# Supplementary material for: Error Tolerance of Machine Learning Algorithms across Contemporary Biological Targets
Source: MDPI journal article supplement (doi:10.3390/molecules24112115), 2019-06-04
Supplement: s1 [file s1]

# Error Tolerance of Machine Learning Algorithms across Contemporary Biological Targets

Supporting Information - Performance Statistics of Machine Learning Algorithms

Thomas M. Kaiser <sup>1,\*</sup> and Pieter B. Burger <sup>2,3,\*</sup>

<sup>1</sup> St Peter's College, University of Oxford, New Inn Hall St, Oxford OX1 2DL , United Kingdom

<sup>2</sup> Department of Drug Discovery and Biomedical Sciences, College of Pharmacy, Medical University of South Carolina, 280 Calhoun St. MSC 141 Charleston, SC 29425-1410, United States

<sup>3</sup> Department of Chemistry, Emory University, 201 Dowman Drive, Atlanta, GA 30322, United States

\*Correspondence: [thomas.kaiser@spc.ox.ac.uk](mailto:thomas.kaiser@spc.ox.ac.uk) (T.M.K.); [pieter.burger@gmail.com](mailto:pieter.burger@gmail.com) (P.B.B.)

# ALK FEP Experiments

# ALK Algorithm Design

- Rules -  $\$RELATION\$ = "="$  OR  $\$IC50\$ > 999$  OR  $\$IC50\$ < 10 \Rightarrow TRUE$
- Sort ascending and remove duplicates
- DefGood was used as 20 nM
- 80-20 split for both actives and inactives
- NBN – ECFP4 used Classifier where Prediction was Active = True
- 1343 Compounds made it through the filter

# NBN Error Tolerance- <20 nM DefGood in AKL

- 27% error confined to the range of 3.7 – 109 nM



<20 nM DefGood in AKL, 27% error (FEP interval); Random seed = 1515533876005

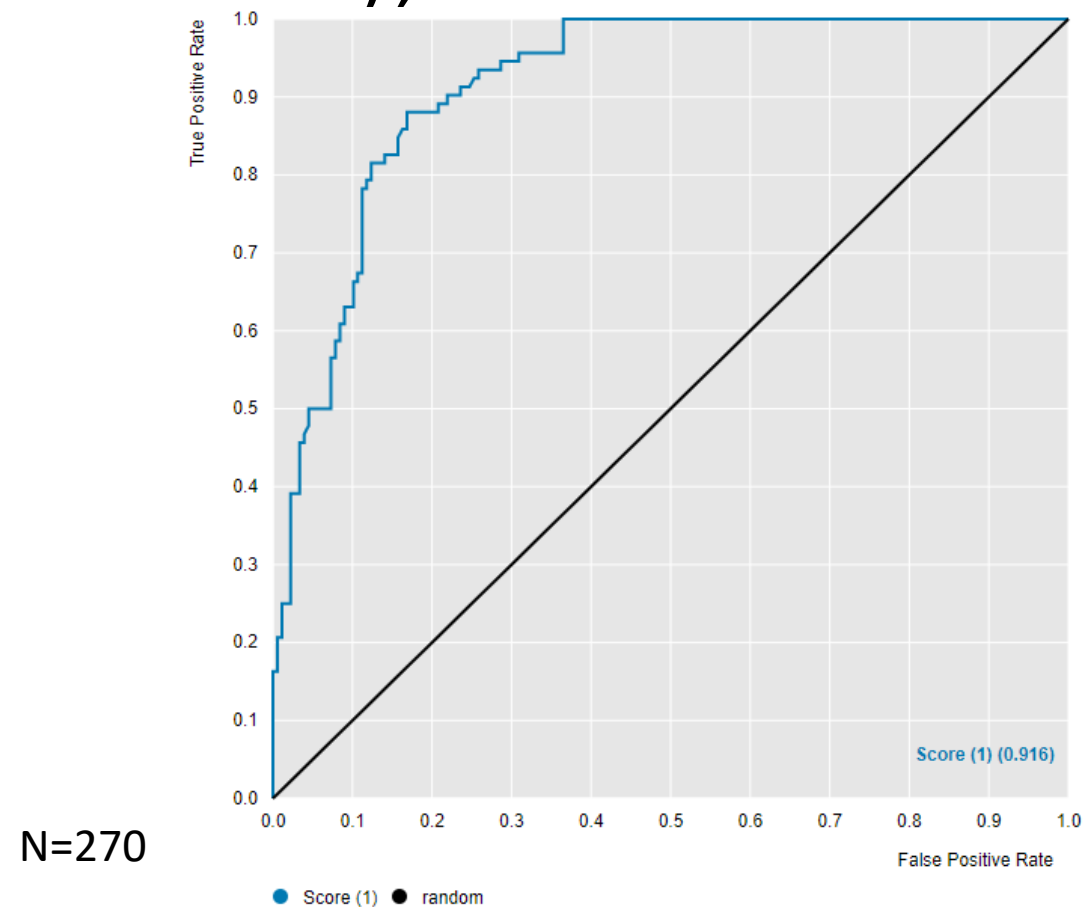

N=270

|                      |           |
|----------------------|-----------|
| Top 10% Mean IC50    | 18.0 nM   |
| Bottom 10% Mean IC50 | 17,000 nM |

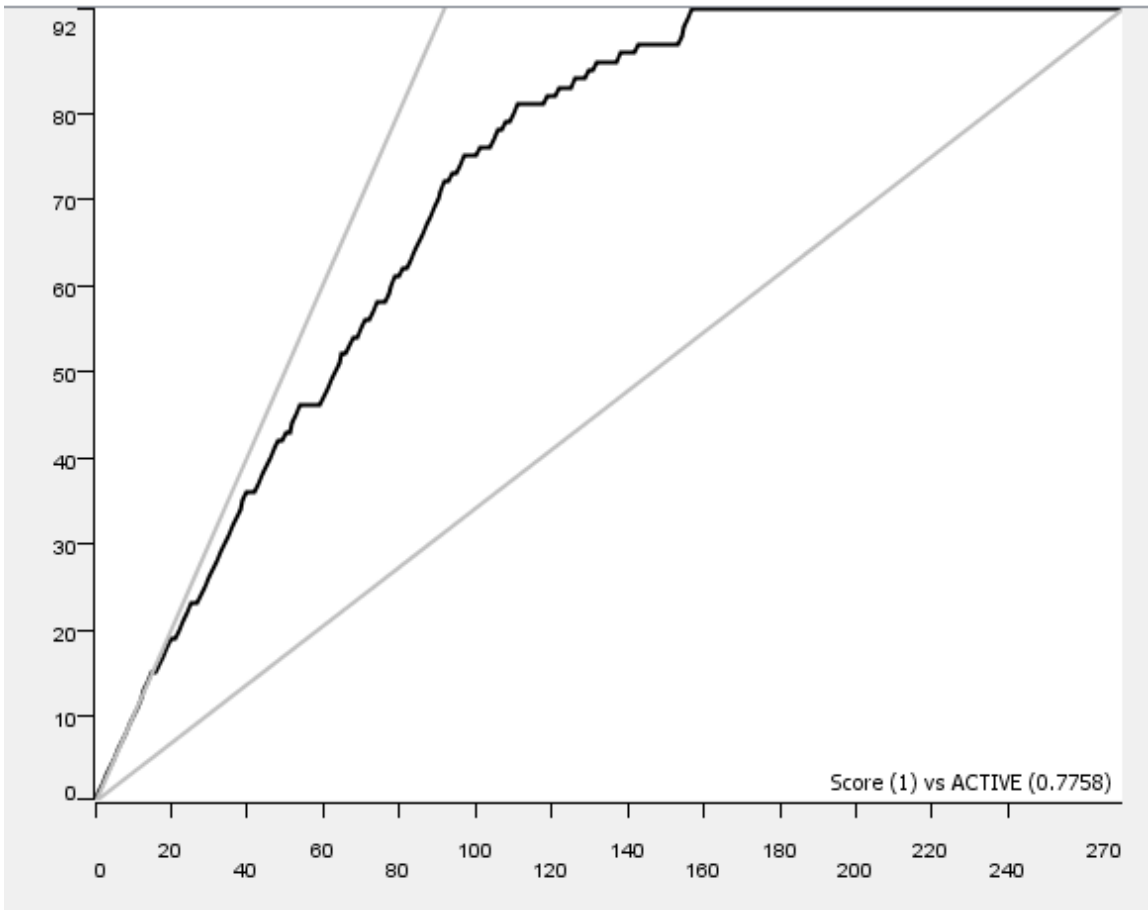

|          | Predicted Active | Predicted Inactive |
|----------|------------------|--------------------|
| Active   | 79               | 13                 |
| Inactive | 29               | 149                |

<20 nM DefGood in AKL, 27% error (FEP interval); Random seed = 429

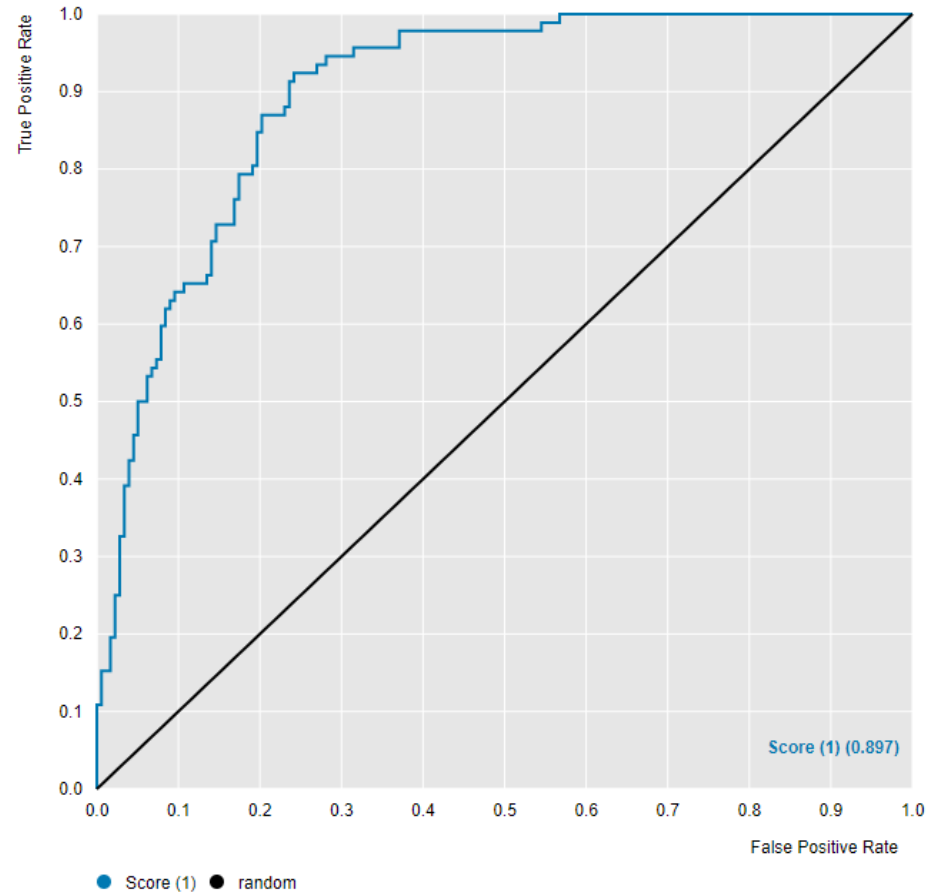

N=270

|                      |          |
|----------------------|----------|
| Top 10% Mean IC50    | 22.5 nM  |
| Bottom 10% Mean IC50 | 7,000 nM |

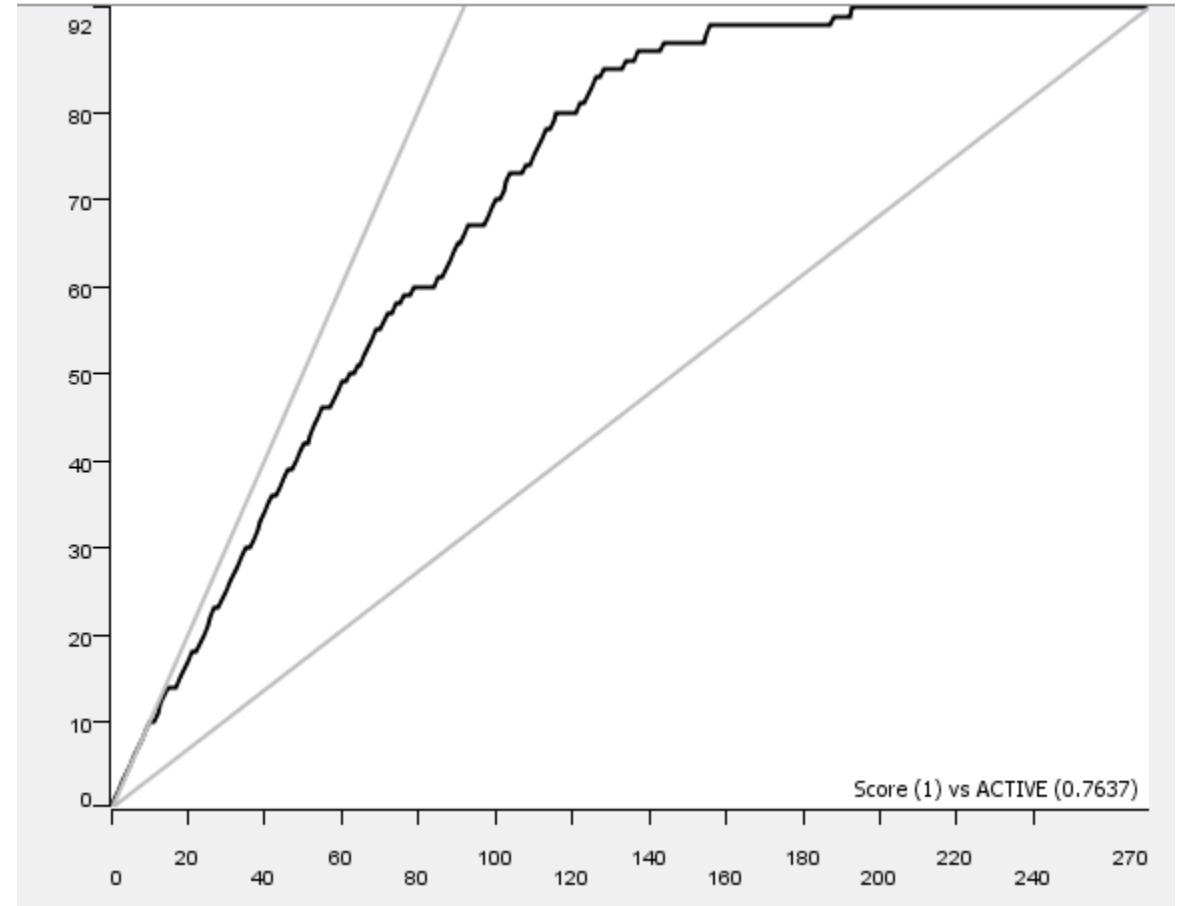

|          | Predicted Active | Predicted Inactive |
|----------|------------------|--------------------|
| Active   | 85               | 7                  |
| Inactive | 45               | 133                |

<20 nM DefGood in AKL, 27% error (FEP interval); Random seed = 121783

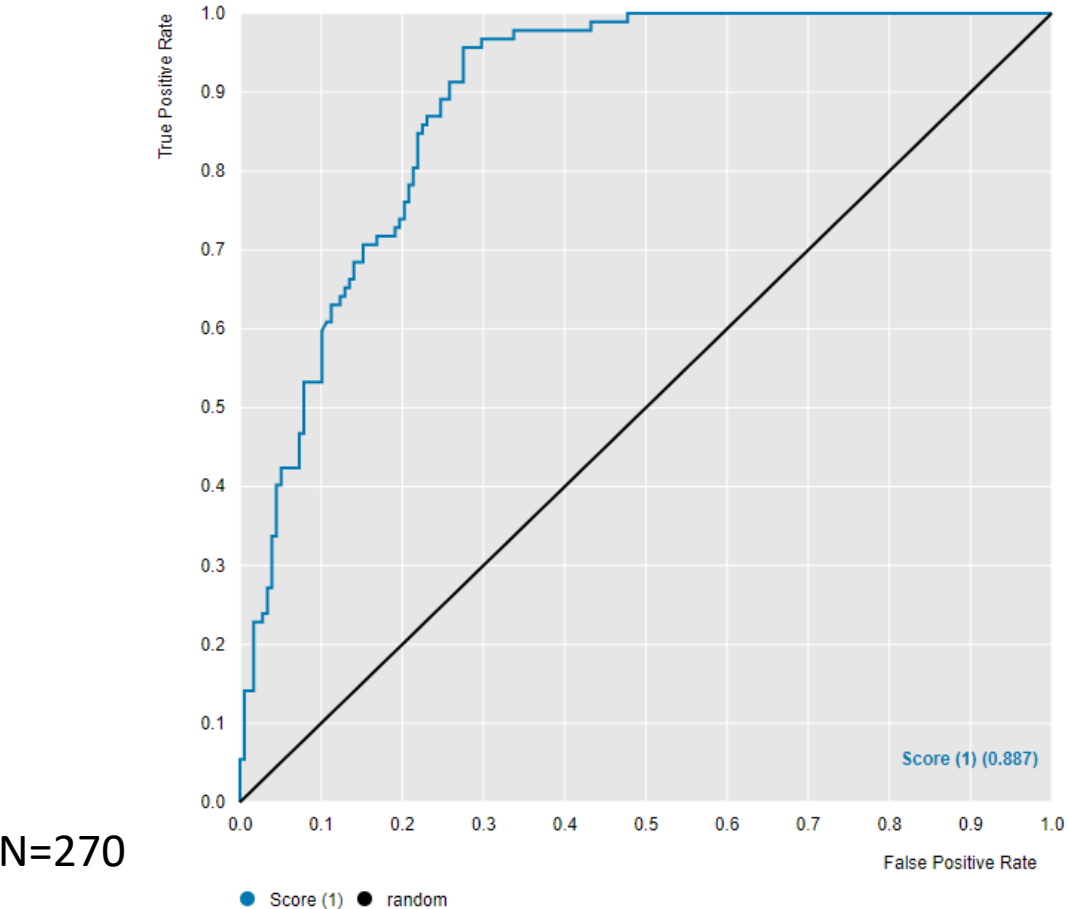

N=270

|                      |           |
|----------------------|-----------|
| Top 10% Mean IC50    | 99.8 nM   |
| Bottom 10% Mean IC50 | 14,000 nM |

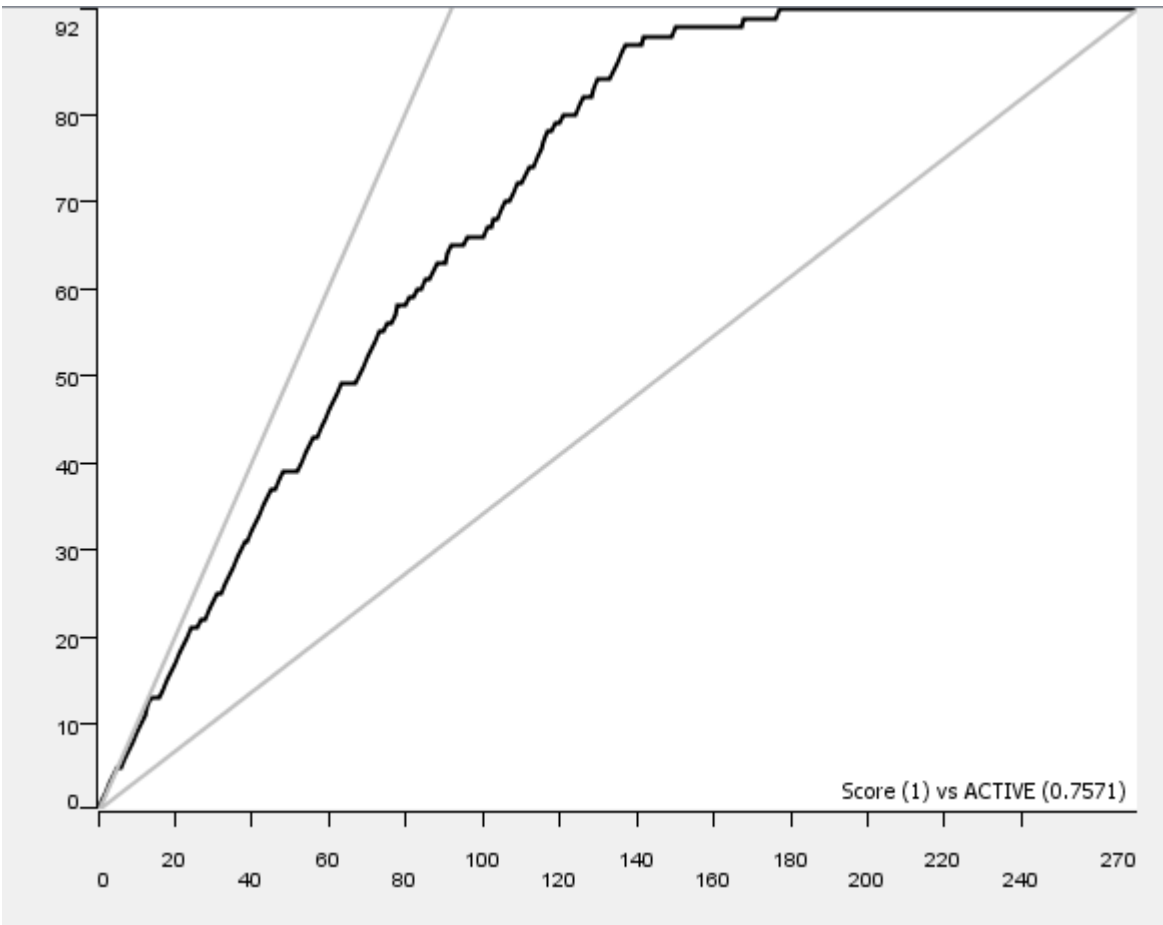

|          | Predicted Active | Predicted Inactive |
|----------|------------------|--------------------|
| Active   | 80               | 12                 |
| Inactive | 42               | 136                |

# Random Forrest Error Tolerance- <20 nM DefGood in AKL

- 27% error confined to the range of 3.7 – 109 nM

RF <20 nM DefGood in AKL, 27% error (FEP interval); Random seed = 1515533876005

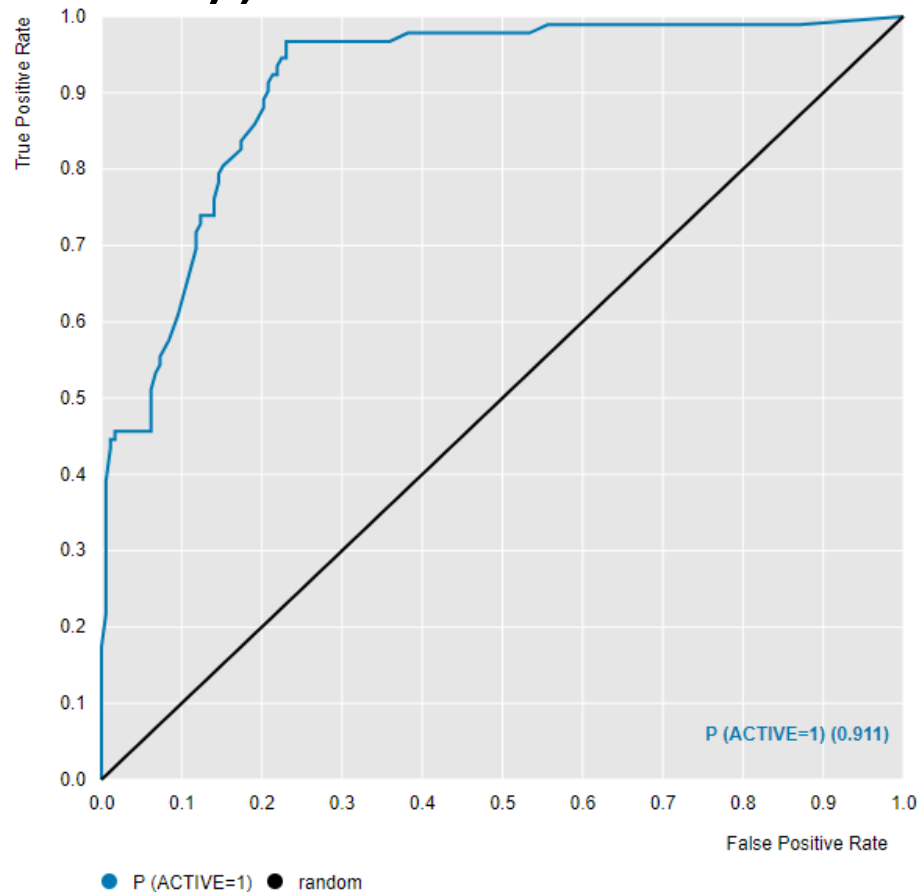

N=270

|                      |           |
|----------------------|-----------|
| Top 10% Mean IC50    | 4.87 nM   |
| Bottom 10% Mean IC50 | 17,000 nM |

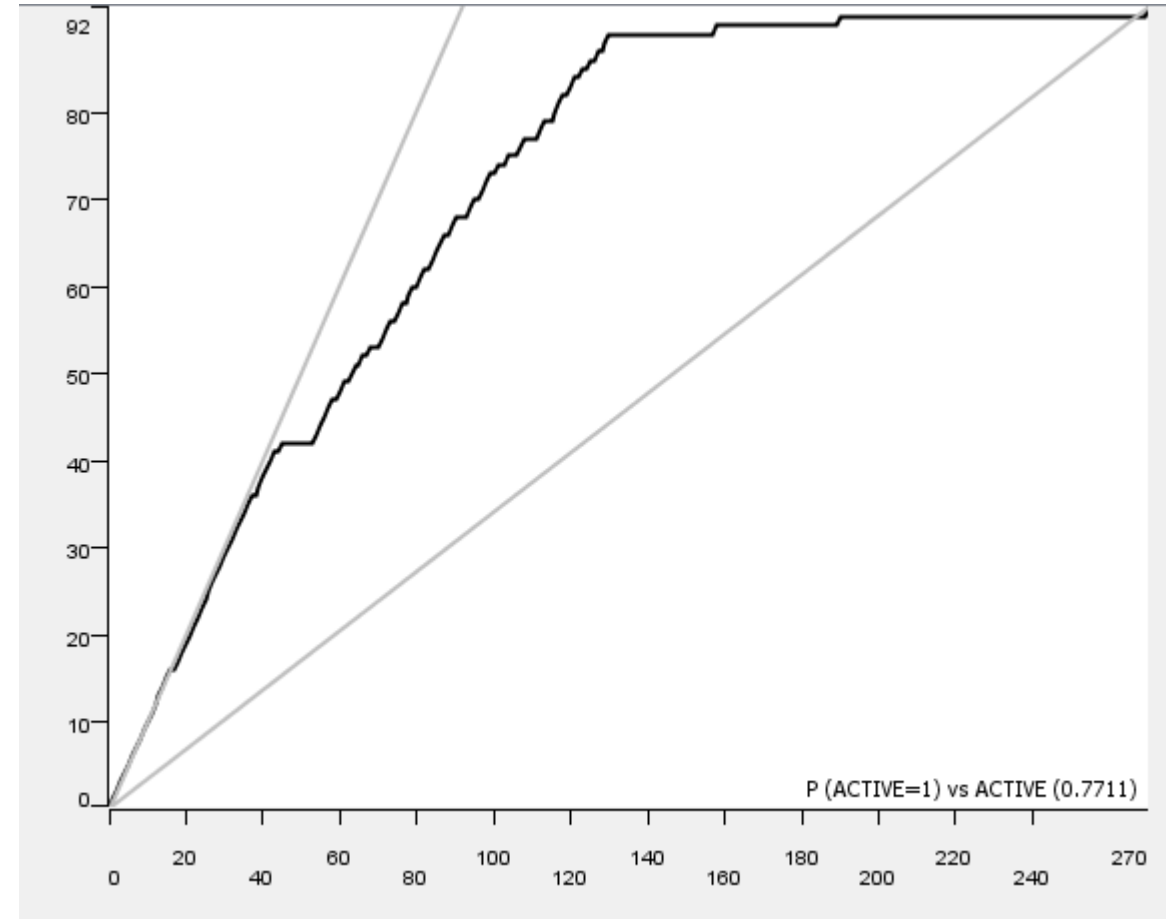

|          | Predicted Active | Predicted Inactive |
|----------|------------------|--------------------|
| Active   | 68               | 24                 |
| Inactive | 22               | 156                |

RF <20 nM DefGood in AKL, 27% error (FEP interval); Random seed = 429

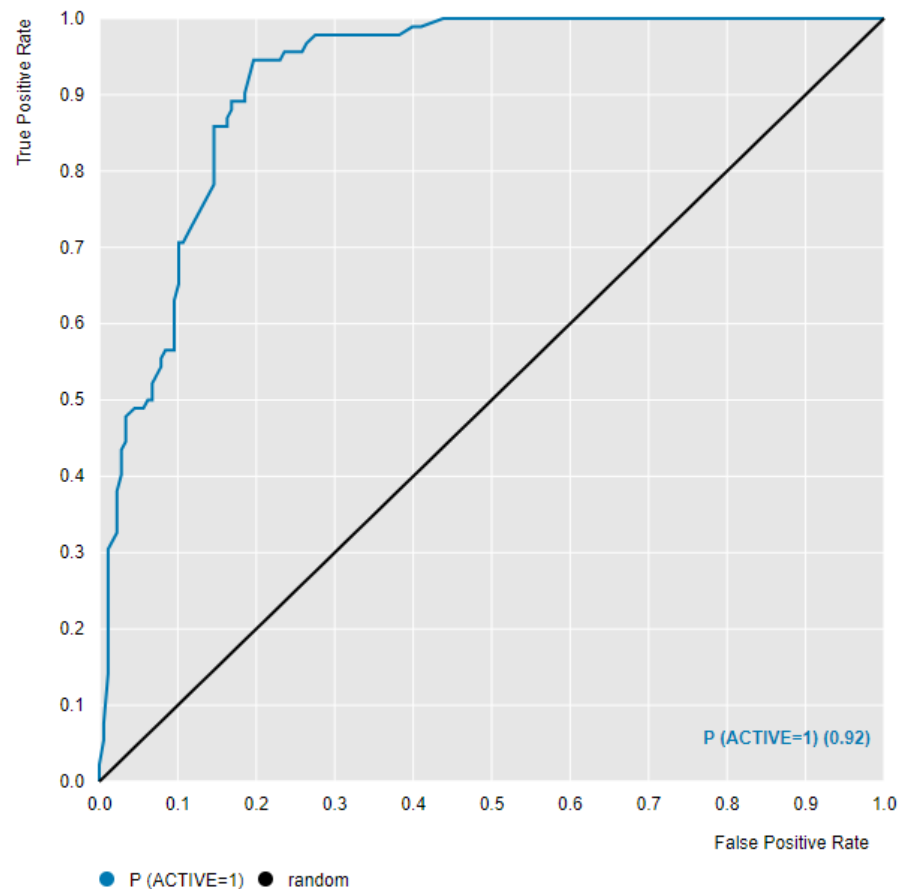

N=270

| Top 10% Mean IC50    | 15.6 nM  |
|----------------------|----------|
| Bottom 10% Mean IC50 | 7,000 nM |

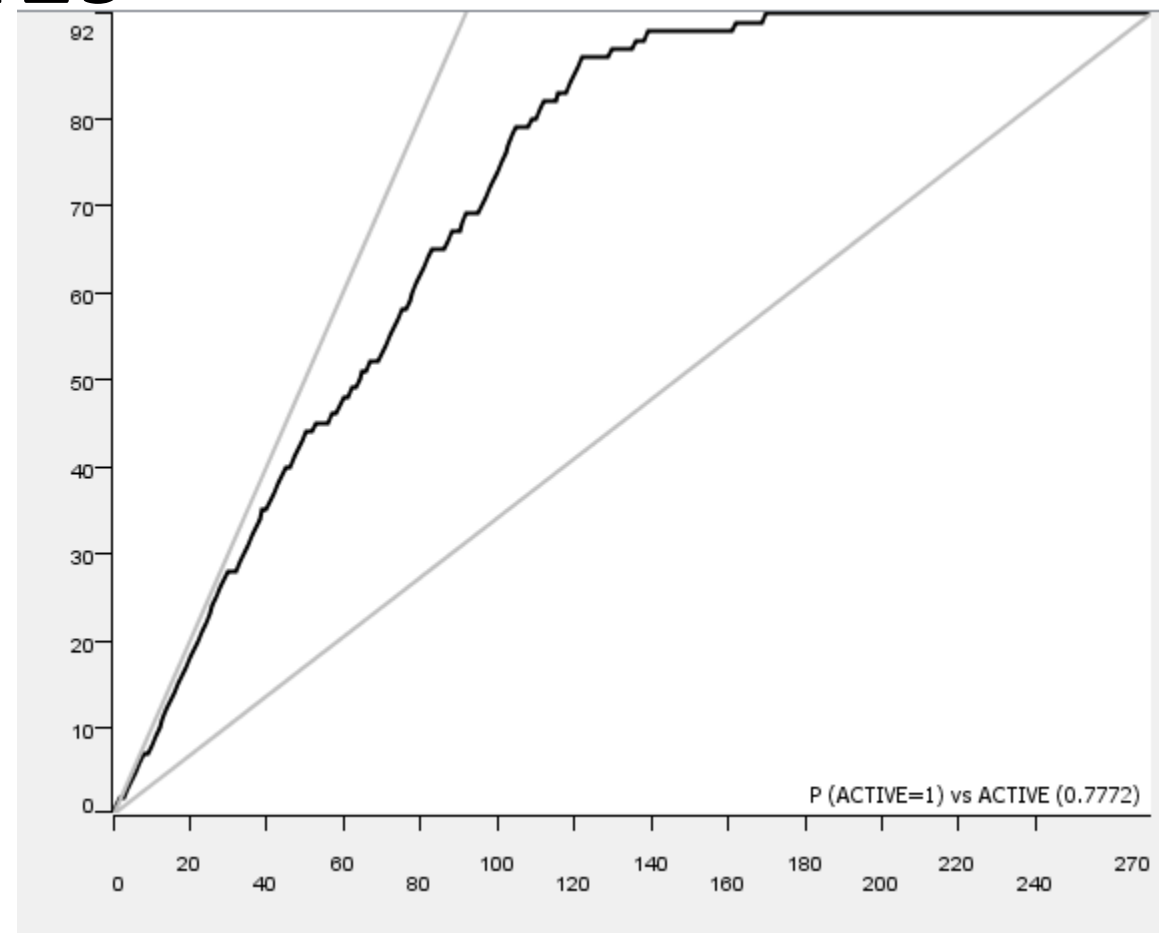

|          | Predicted Active | Predicted Inactive |
|----------|------------------|--------------------|
| Active   | 79               | 13                 |
| Inactive | 28               | 150                |

# RF<20 nM DefGood in AKL, 27% error (FEP interval); Random seed = 121783

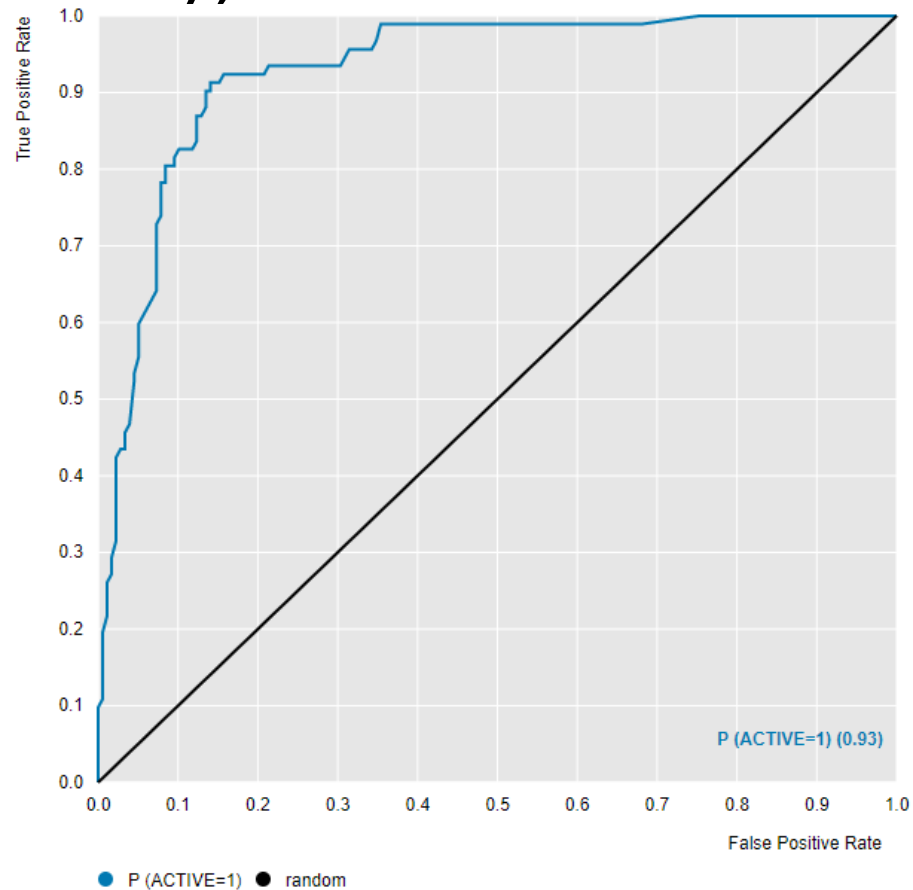

N=270

|                      |           |
|----------------------|-----------|
| Top 10% Mean IC50    | 9.74 nM   |
| Bottom 10% Mean IC50 | 12,000 nM |

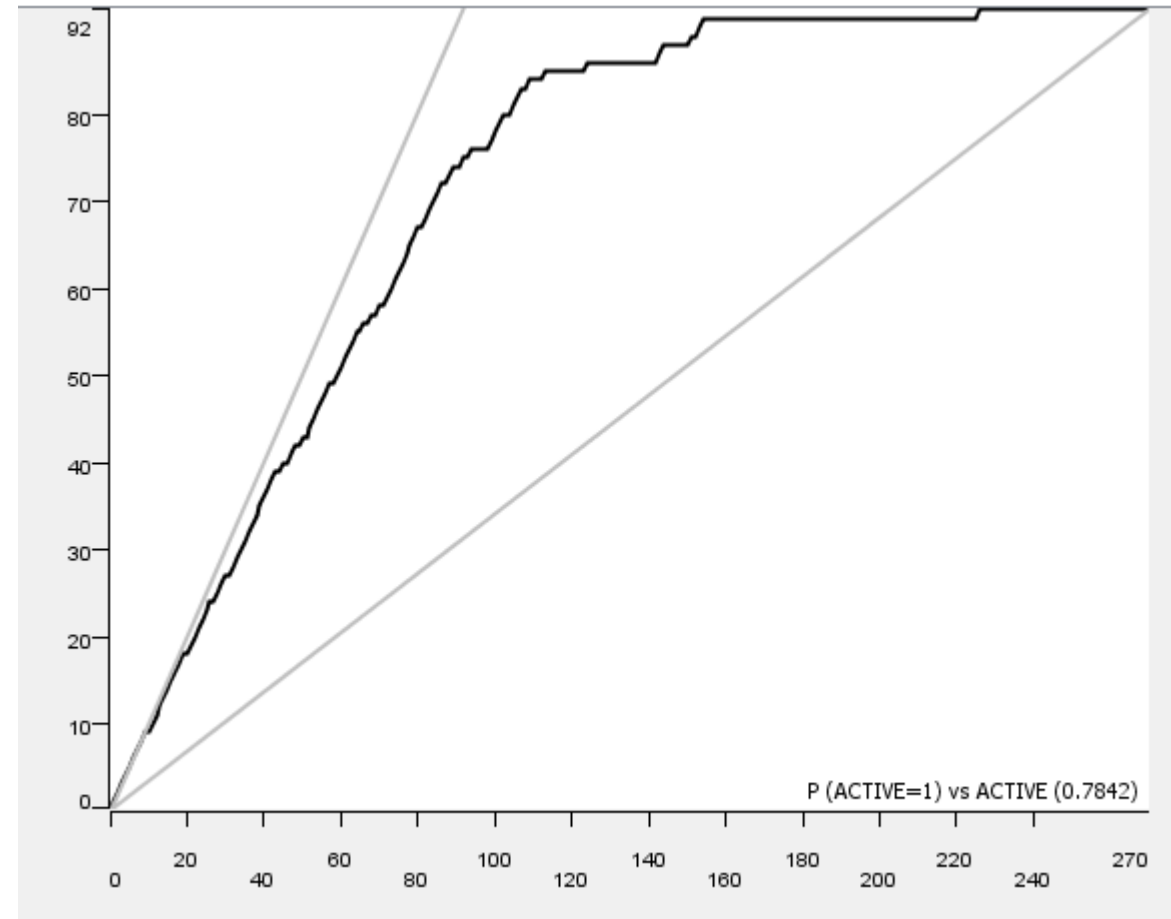

|          | Predicted Active | Predicted Inactive |
|----------|------------------|--------------------|
| Active   | 75               | 17                 |
| Inactive | 17               | 161                |

ALK



# ALK NBN Design

- Rules -  $\$RELATION\$ = "="$  OR  $\$IC50\$ > 999$  OR  $\$IC50\$ < 10 \Rightarrow TRUE$
- Sort ascending and remove duplicates
- DefGood scanned between 5 and 25 nM
- 80-20 split for both actives and inactives
- NBN – ECFP4 used Classifier where Prediction was Active = True
- 1343 Compounds made it through the filter

# <5 nM DefGood in ALK

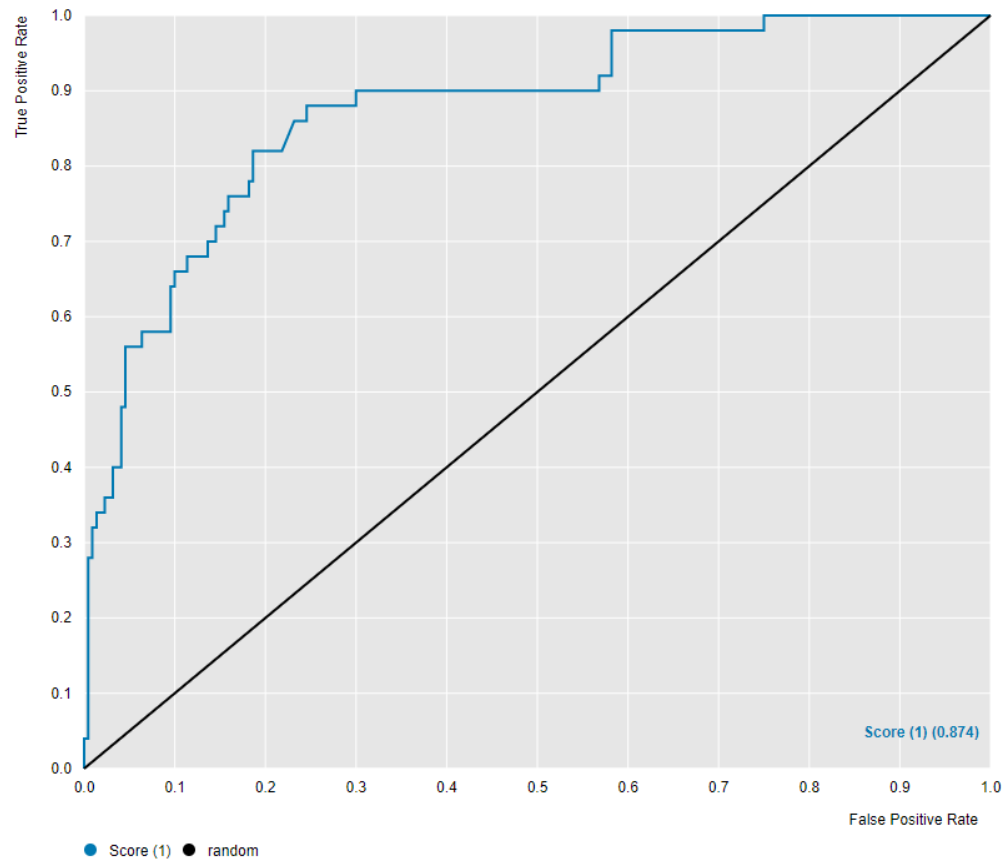

N=270

Top 10% Mean  
IC50

5.3 nM

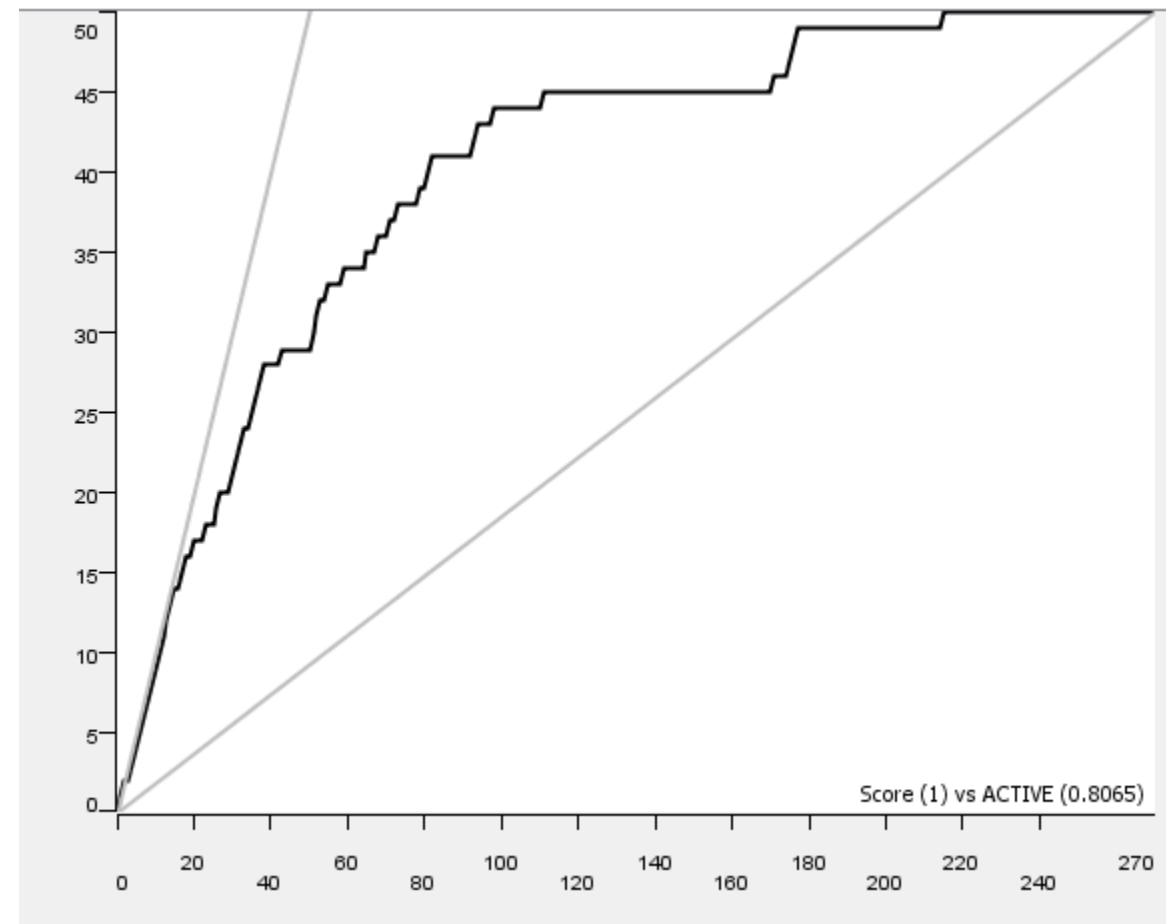

|          | Predicted Active | Predicted Inactive |
|----------|------------------|--------------------|
| Active   | 44               | 6                  |
| Inactive | 55               | 165                |

# <10 nM DefGood in ALK

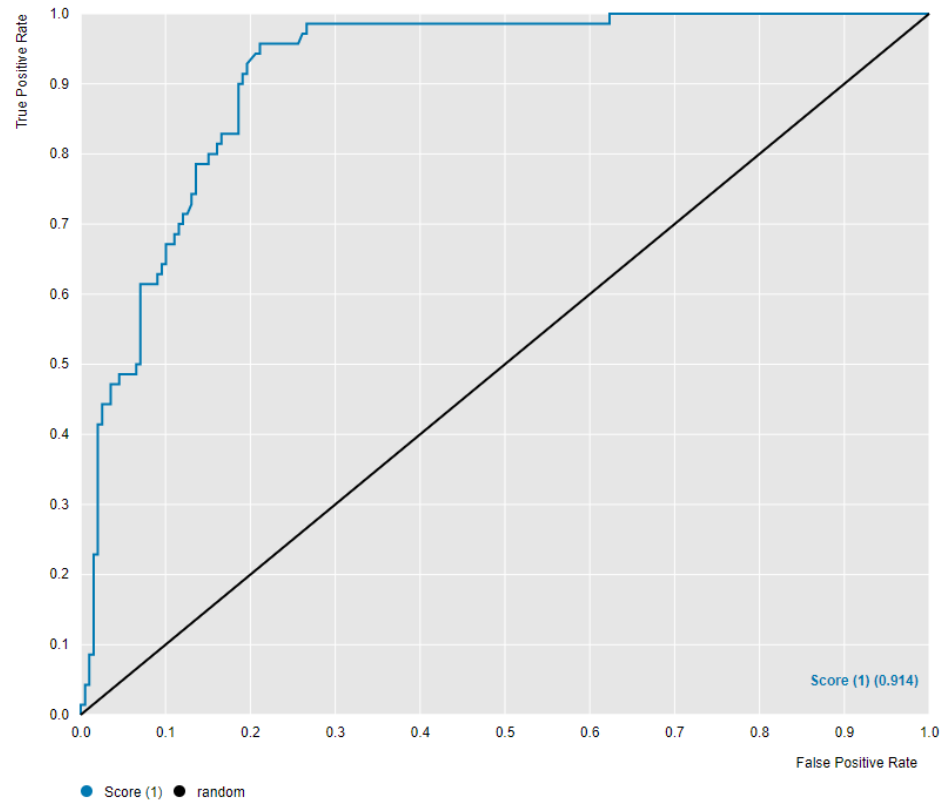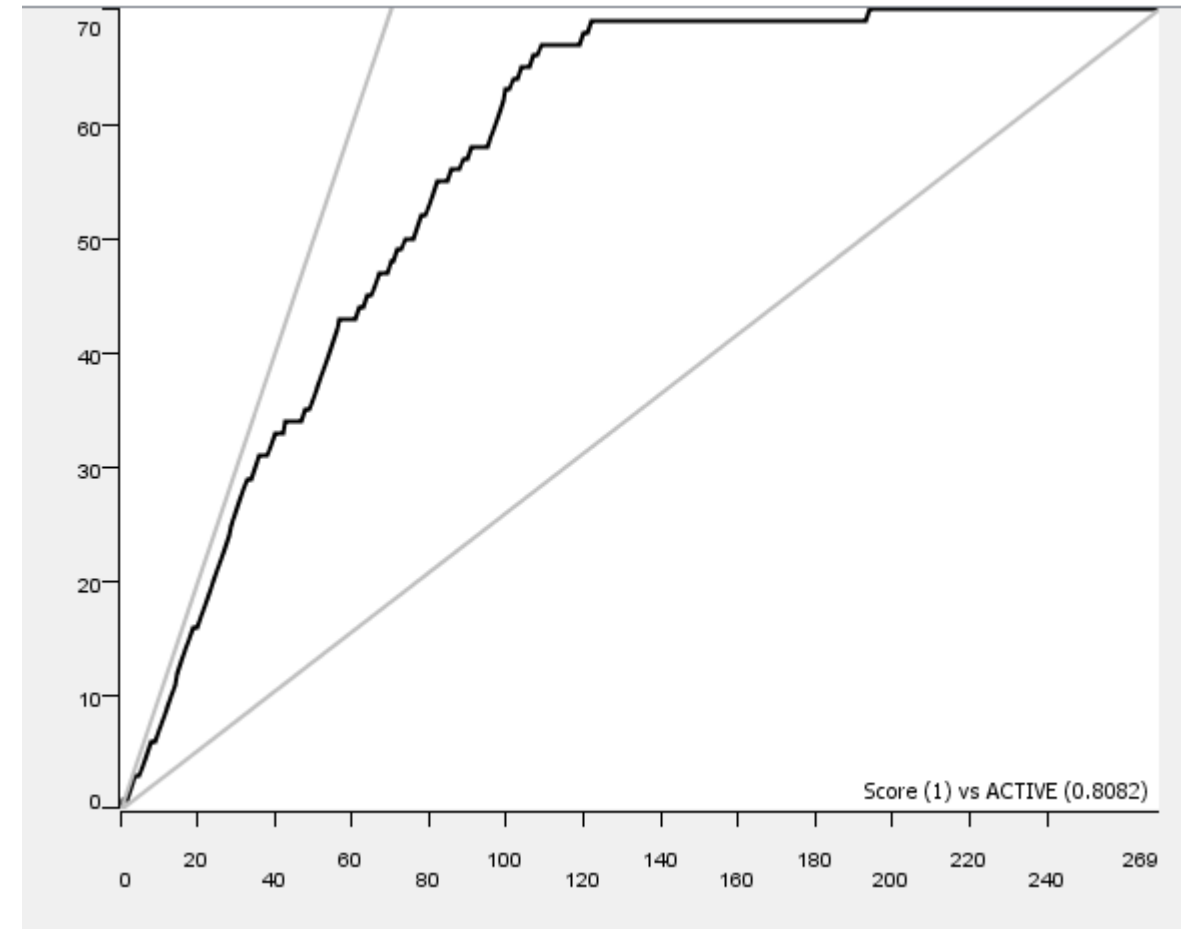

N=269

Top 10% Mean  
IC50

14.6 nM

|          | Predicted Active | Predicted Inactive |
|----------|------------------|--------------------|
| Active   | 67               | 3                  |
| Inactive | 45               | 154                |

# <15 nM DefGood in ALK

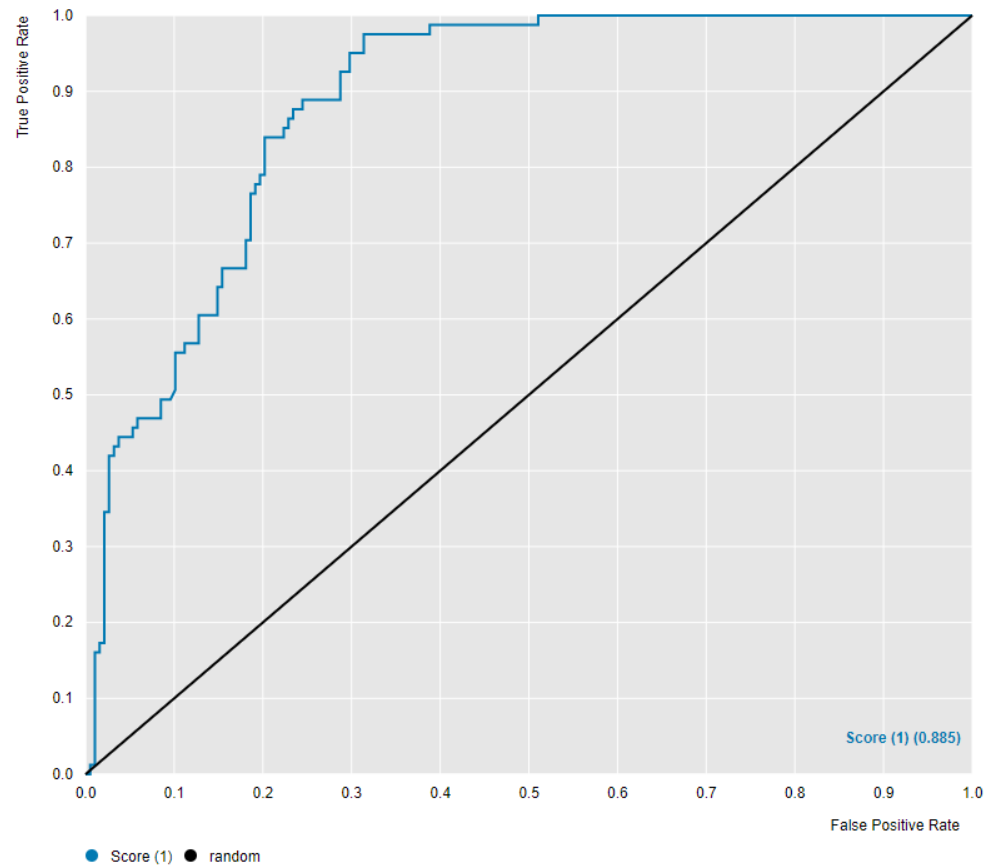

N=269

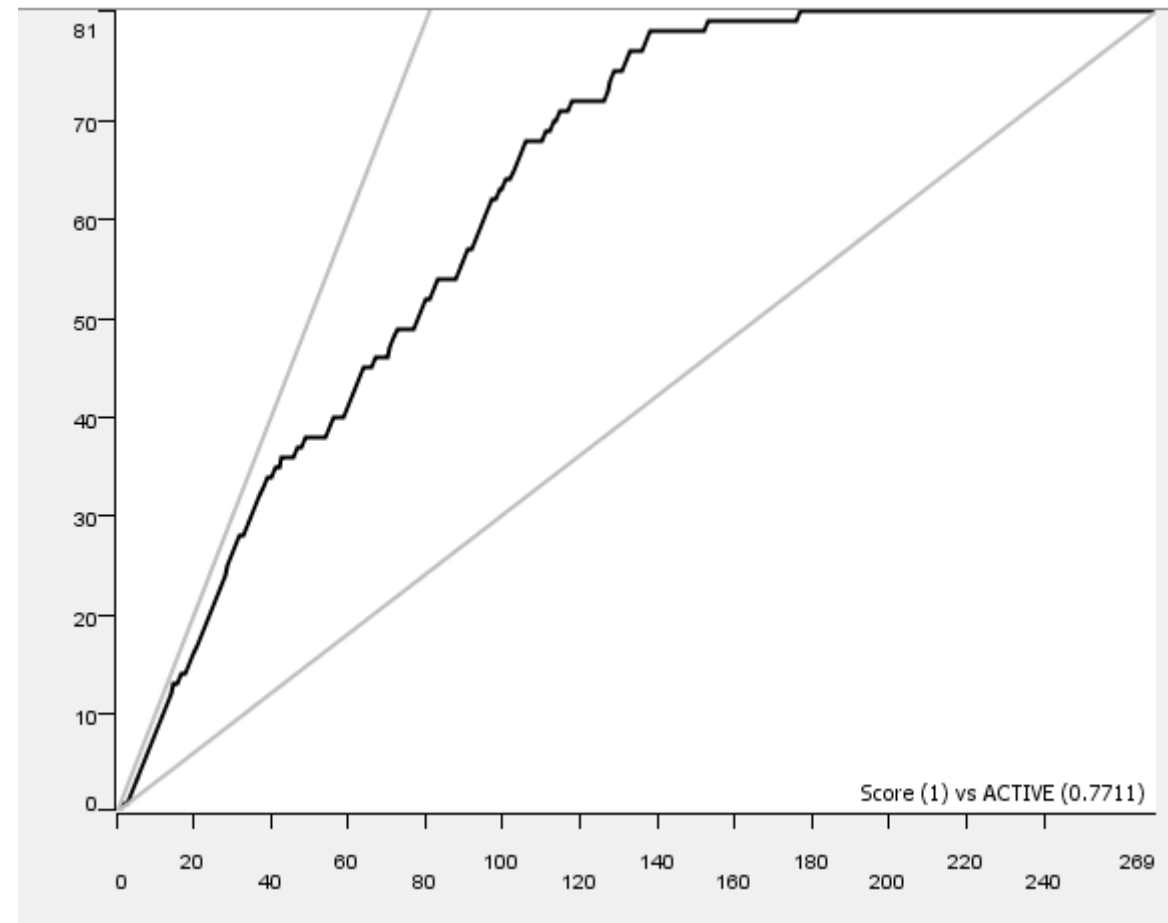

Top 10% Mean  
IC50

7.3 nM

|          | Predicted Active | Predicted Inactive |
|----------|------------------|--------------------|
| Active   | 71               | 10                 |
| Inactive | 46               | 142                |

# <20 nM DefGood in ALK

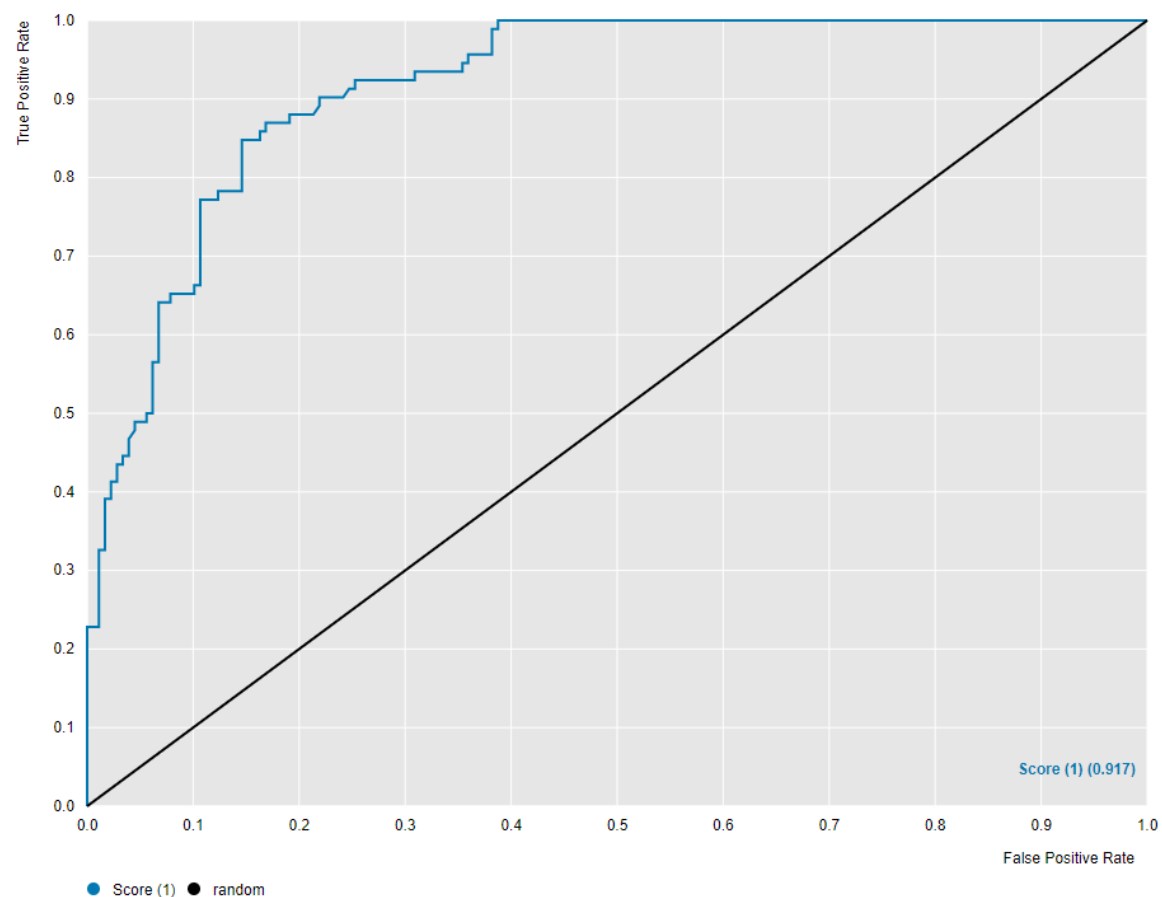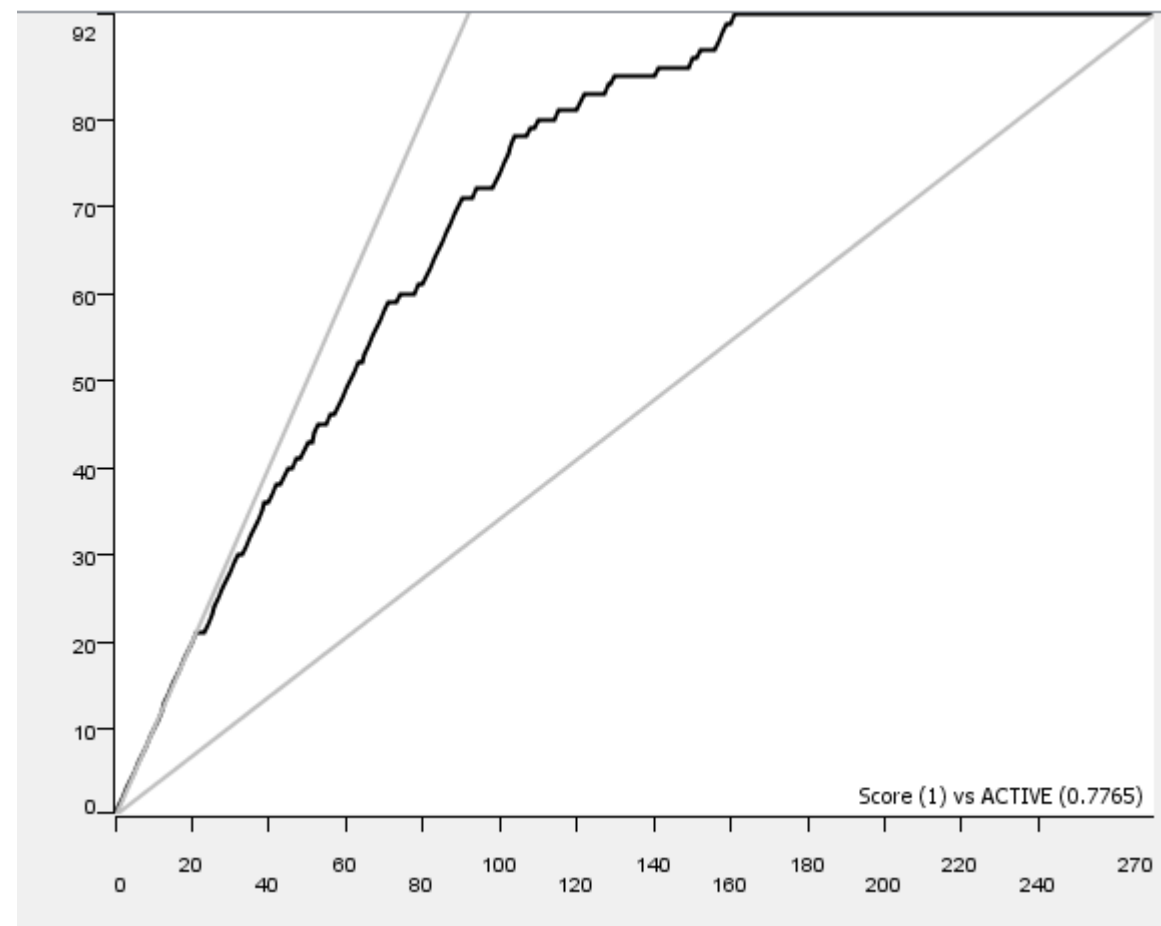

N=270

Top 10% Mean  
IC50

6.7 nM

|          | Predicted Active | Predicted Inactive |
|----------|------------------|--------------------|
| Active   | 82               | 10                 |
| Inactive | 39               | 139                |

# <25 nM DefGood in ALK

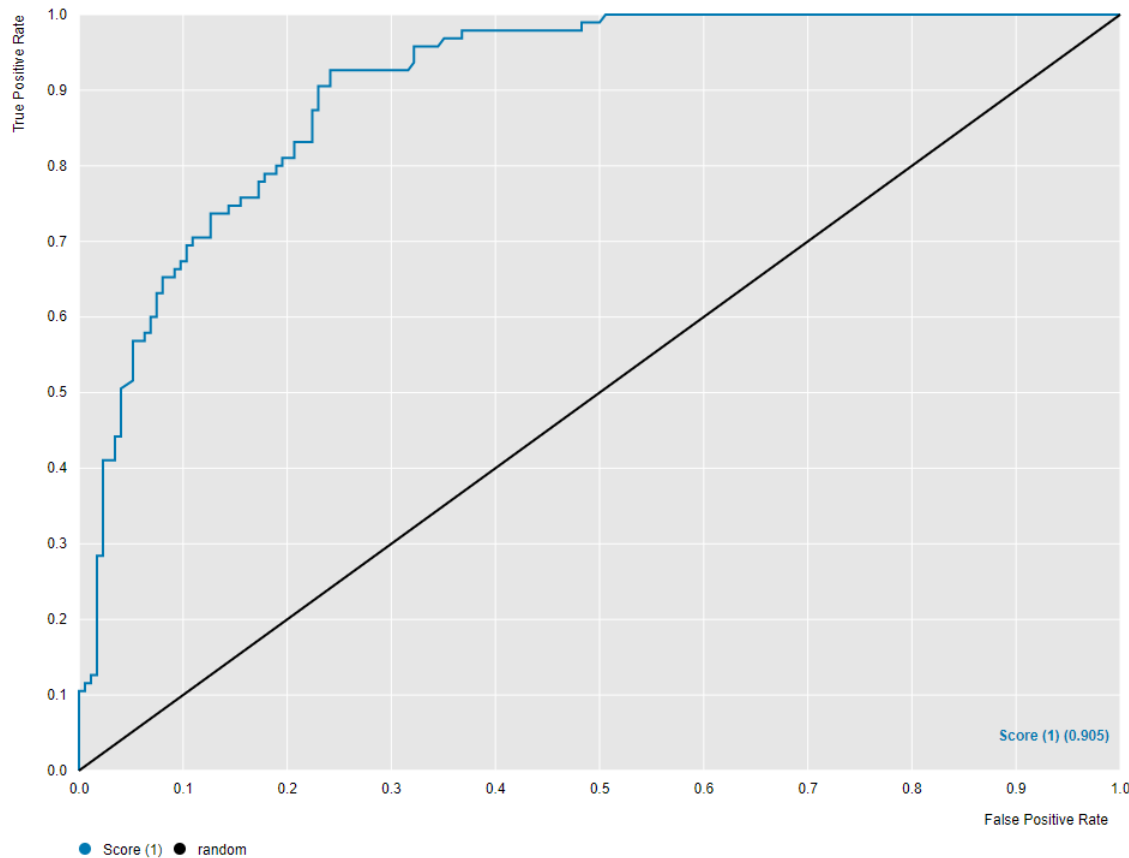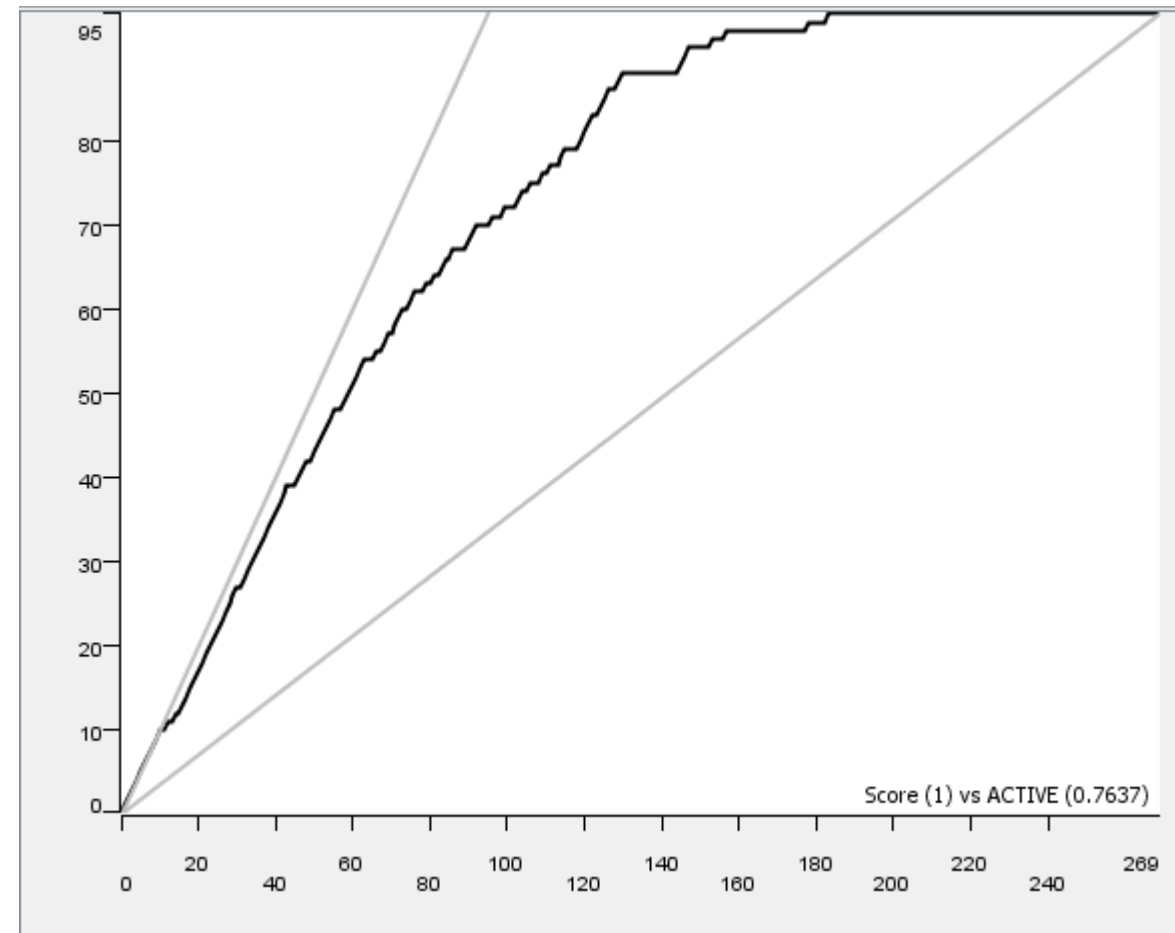

N=269

| Top 10% Mean IC50 | 19.1 nM |
|-------------------|---------|
|-------------------|---------|

|          | Predicted Active | Predicted Inactive |
|----------|------------------|--------------------|
| Active   | 88               | 7                  |
| Inactive | 44               | 130                |

# Decision on DefGood

- <20 nM has the best performance overall. <20 nM may not have the best top 10% IC50, but it is second best at 6.7 and the chemical space defined as good is much larger than the <5 nM NBN without losing significant potency on average. Also the specificity is much higher.

# RF - <15 nM DefGood in ALK

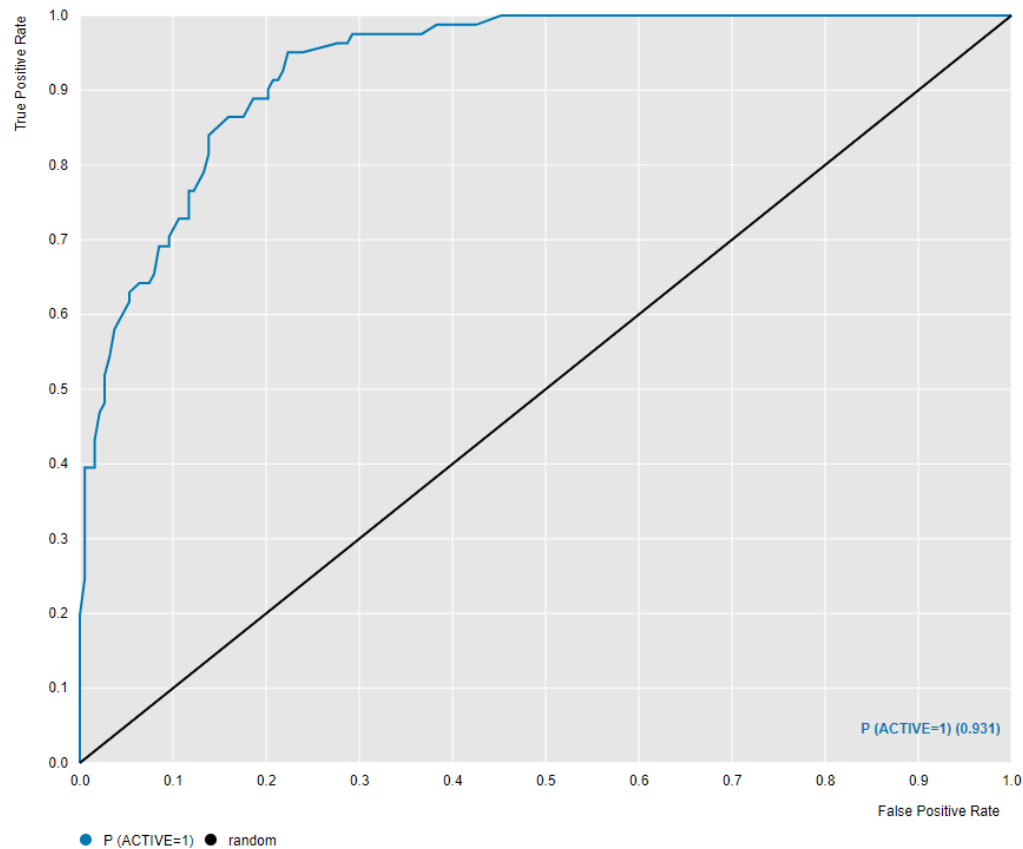

N=269

Top 10% Mean  
IC50

3.9 nM

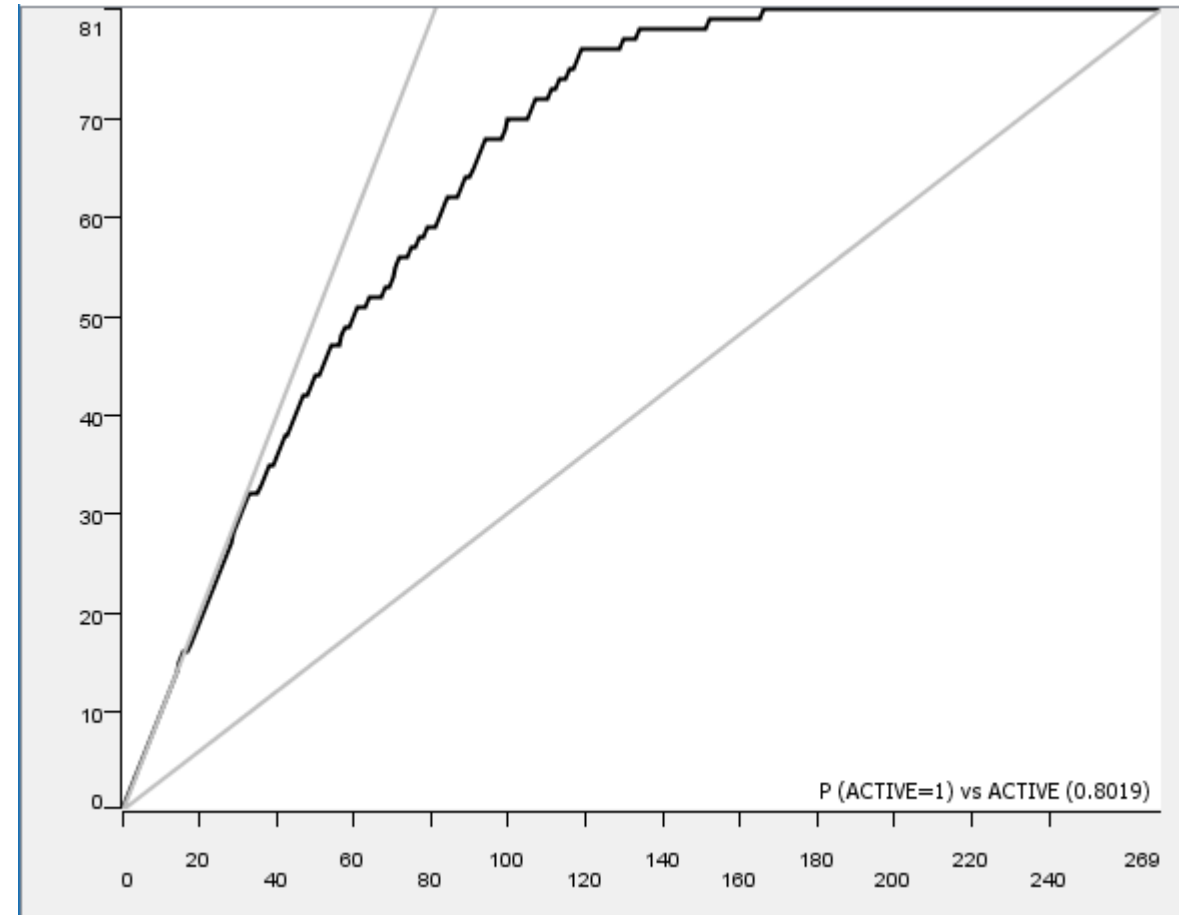

|          | Predicted Active | Predicted Inactive |
|----------|------------------|--------------------|
| Active   | 61               | 20                 |
| Inactive | 22               | 166                |



# RF - <20 nM DefGood in ALK

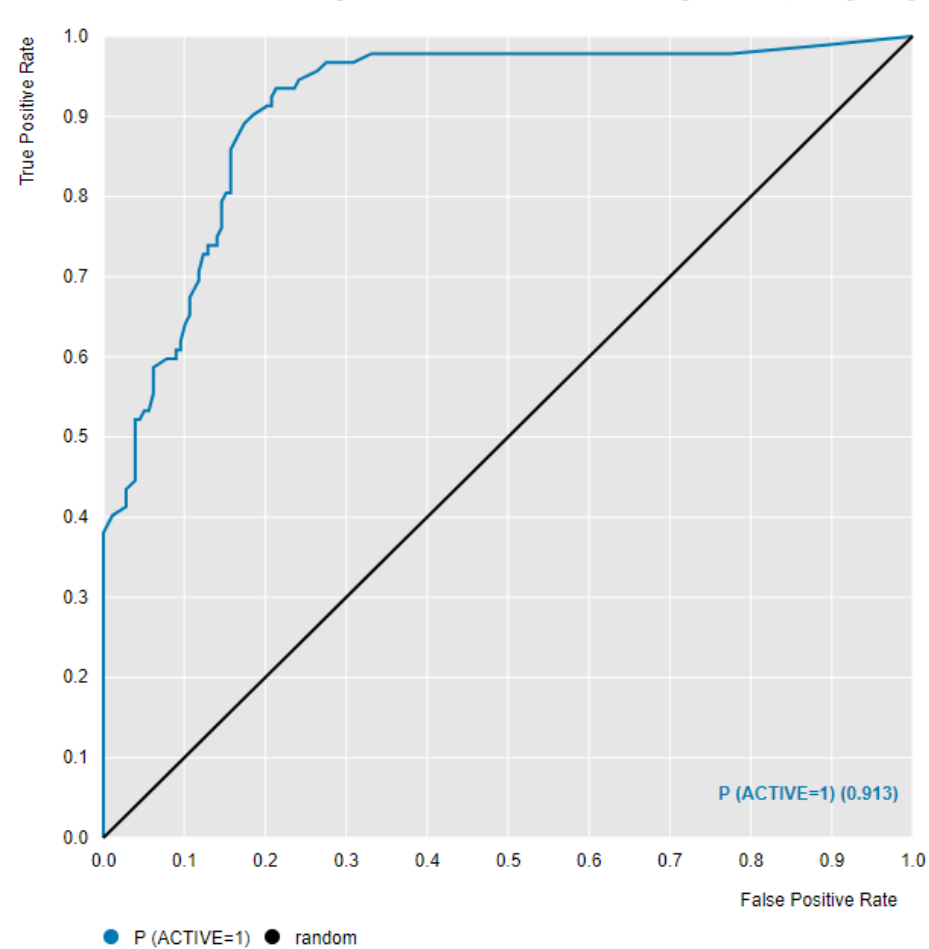

N=269

| Top 10% Mean IC50 | 3.3 nM |
|-------------------|--------|
|-------------------|--------|

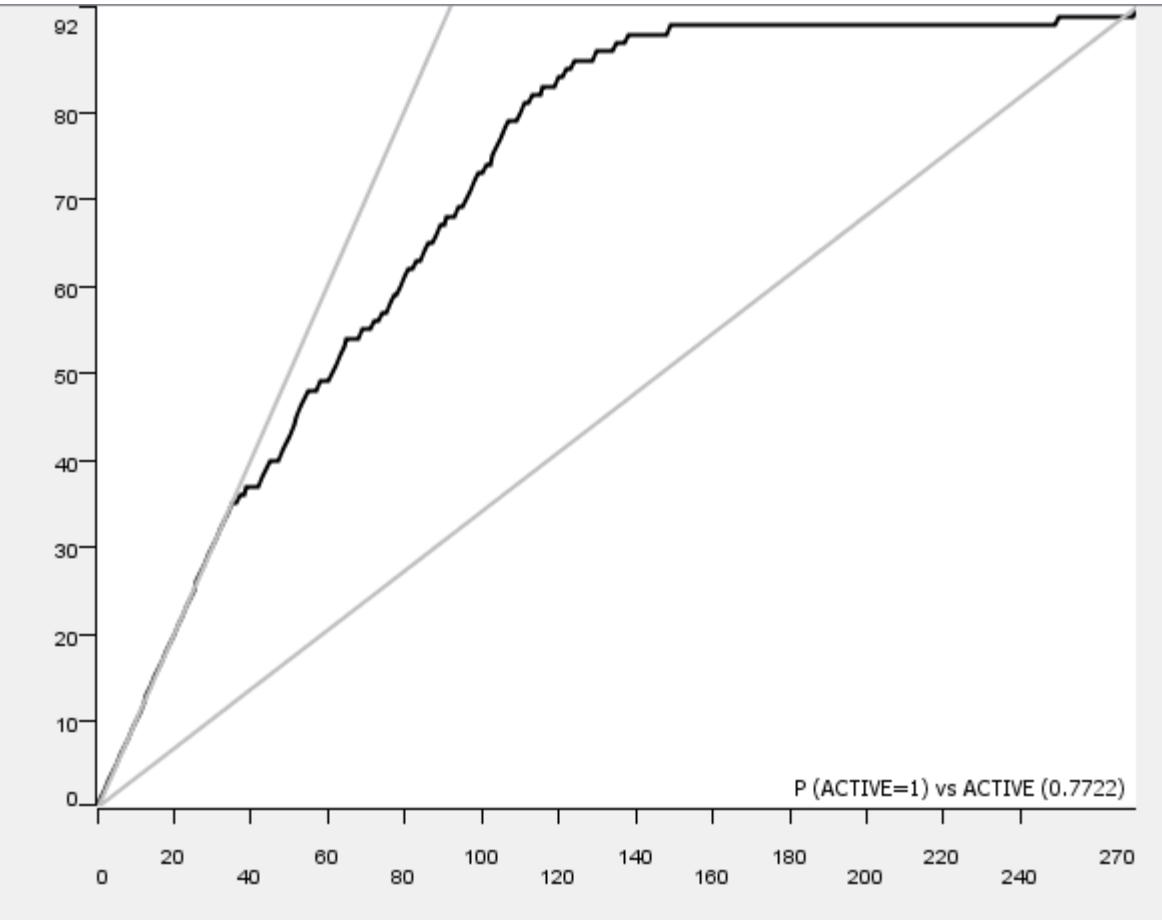

|          | Predicted Active | Predicted Inactive |
|----------|------------------|--------------------|
| Active   | 68               | 24                 |
| Inactive | 24               | 154                |

# RF - <25 nM DefGood in ALK

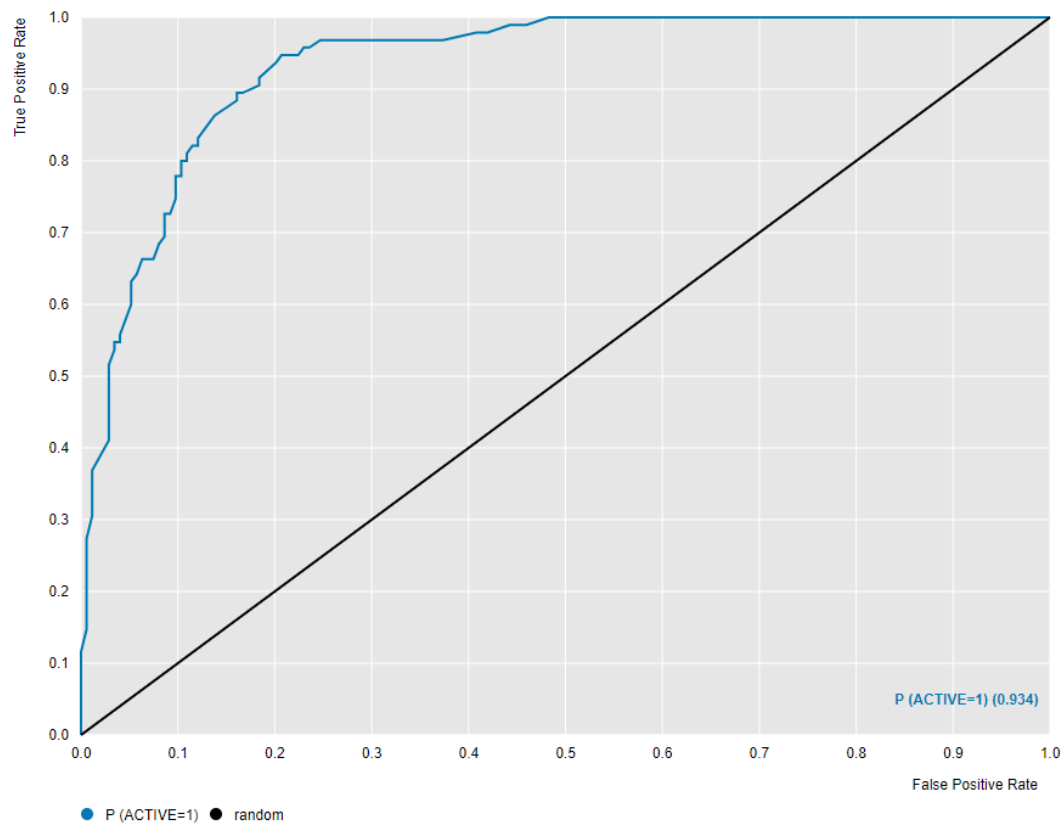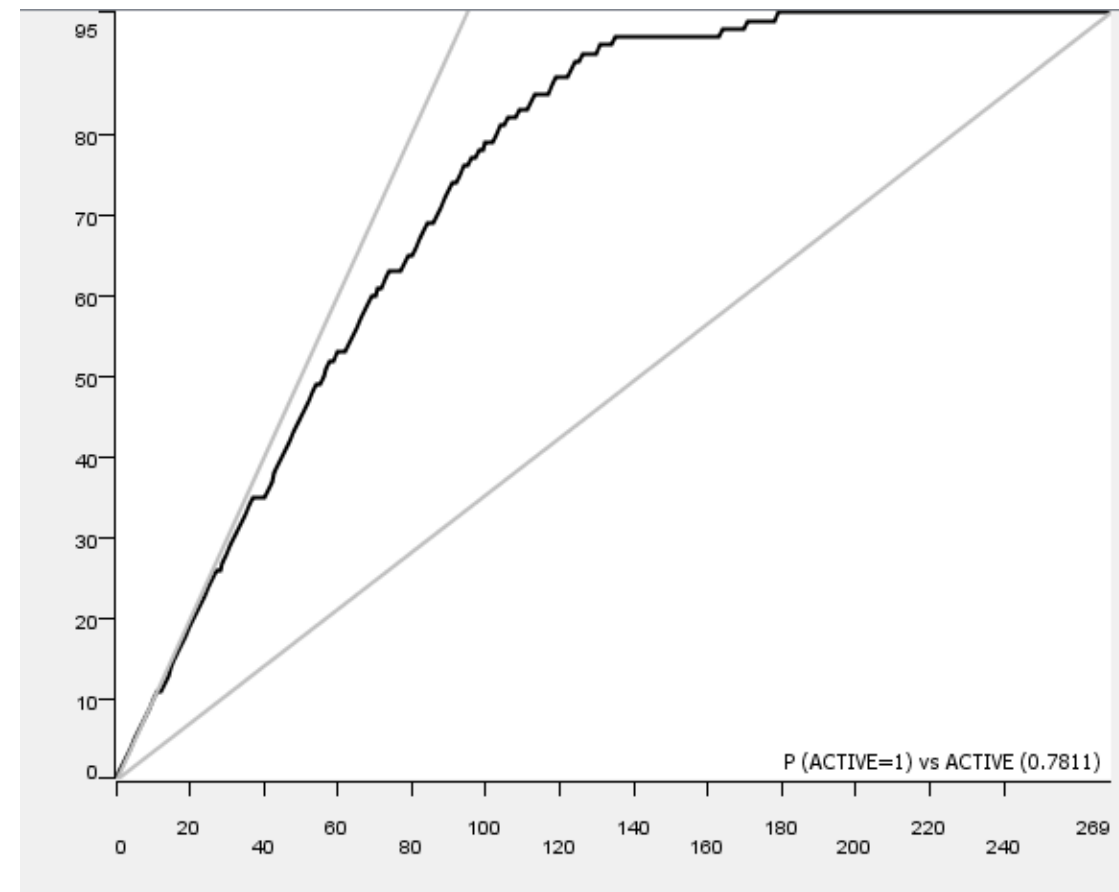

N=269

Top 10% Mean  
IC50

14.5 nM

|          | Predicted Active | Predicted Inactive |
|----------|------------------|--------------------|
| Active   | 76               | 19                 |
| Inactive | 19               | 155                |

# Decision on DefGood - RF

- <20 nM has the best performance overall. This mirrored the NBN DefGood, and the DefGood for the NBNs in the future will be used for the RFs as well.

# PNN - <20 nM DefGood in AKL

- Properties List (46 calculatable properties were used)
- Parameterization (Global Accuracy for Activity at a 20 nM decision value was used, and a 5-fold stratified sampling cross validation was used to parameterize theta minus and theta plus) Theta Minus = 0.35 and Theta Plus = 0.65

# PNN - <20 nM DefGood in AKL

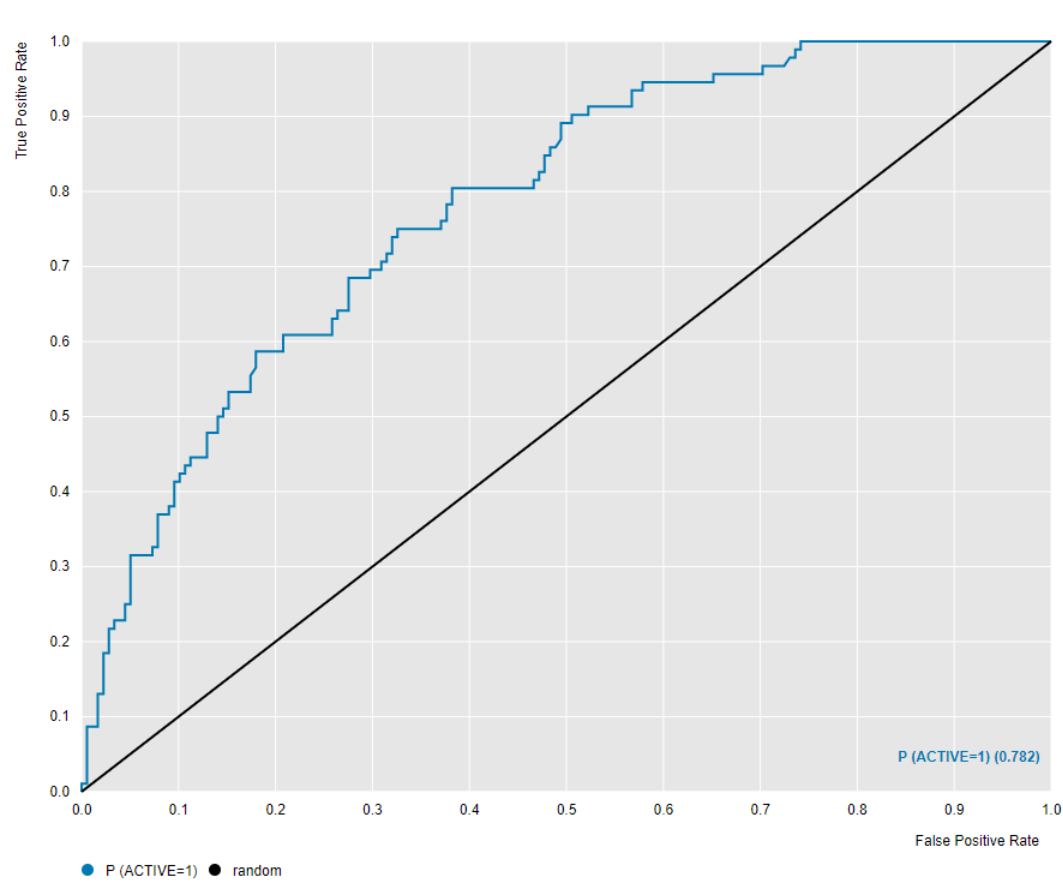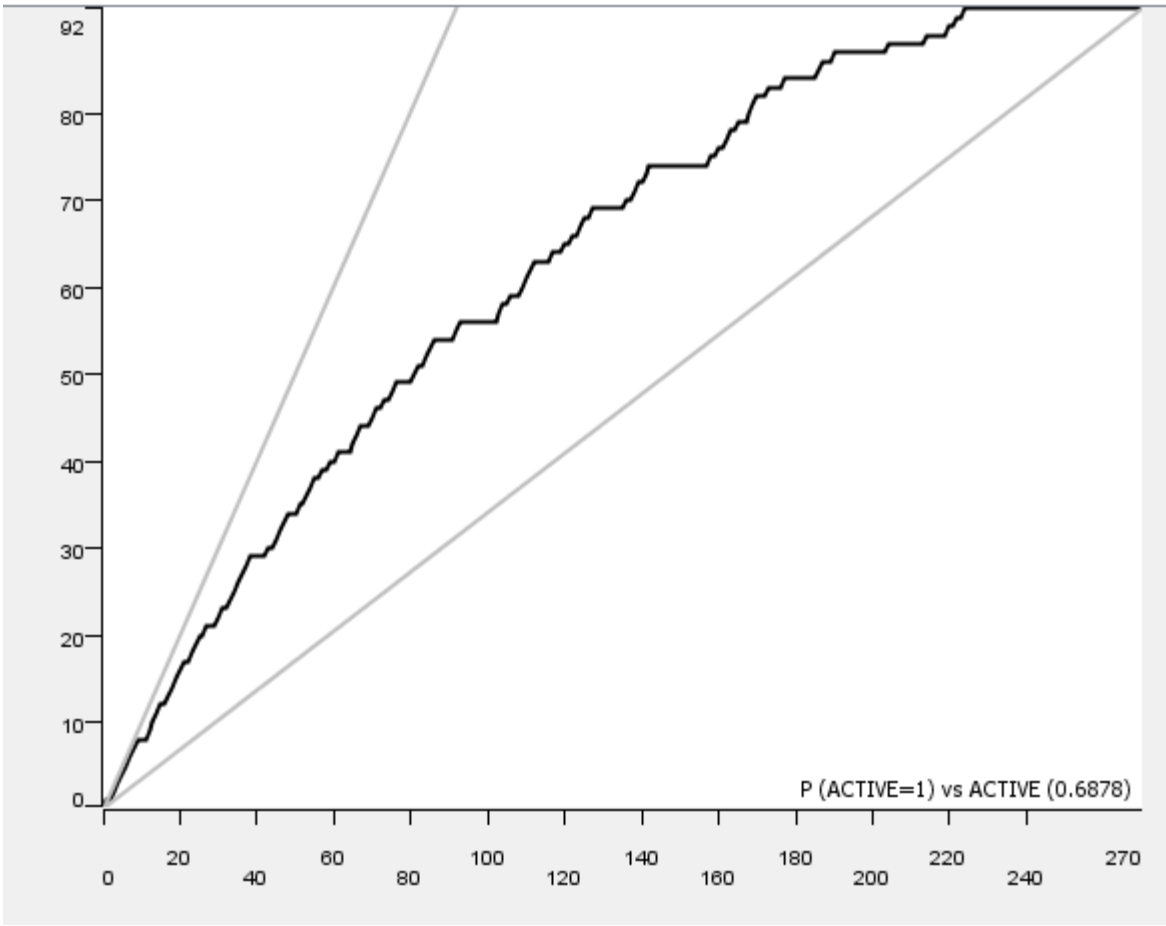

N=270

|                      |         |
|----------------------|---------|
| Top 10% Mean<br>IC50 | 34.7 nM |
|----------------------|---------|

|          | Predicted Active | Predicted Inactive |
|----------|------------------|--------------------|
| Active   | 49               | 43                 |
| Inactive | 27               | 151                |

# PNN - <15 nM DefGood in AKL (unparameterized)

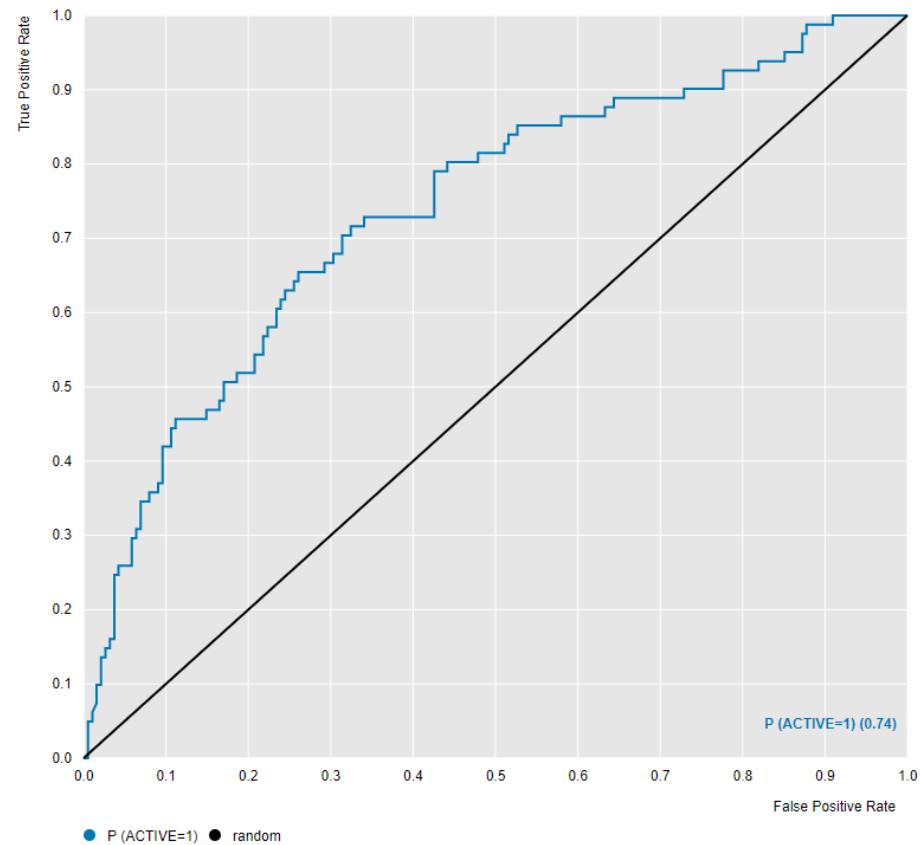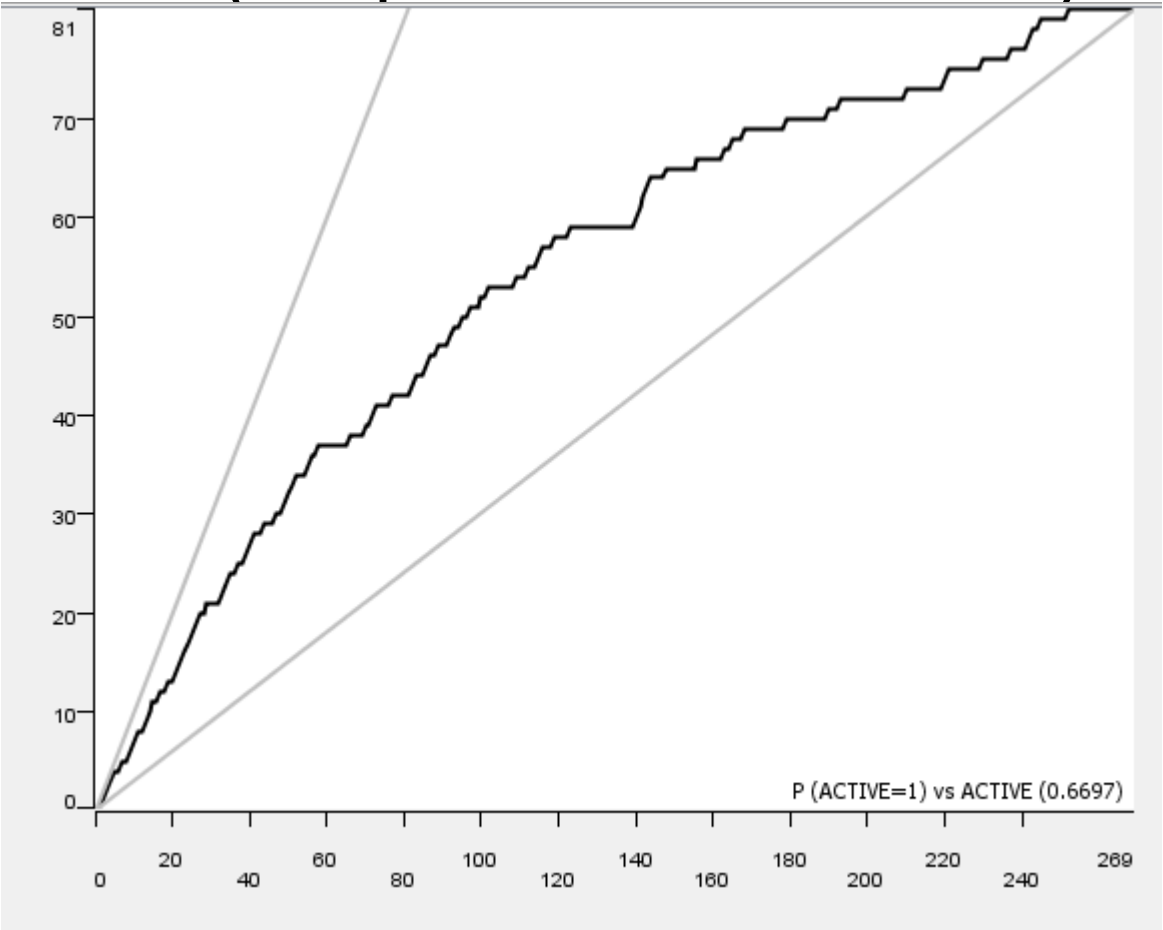

N=269

|                   |          |
|-------------------|----------|
| Top 10% Mean IC50 | 1,200 nM |
|-------------------|----------|

|          | Predicted Active | Predicted Inactive |
|----------|------------------|--------------------|
| Active   | 18               | 63                 |
| Inactive | 7                | 181                |

# PNN - <25 nM DefGood in AKL (unparameterized)

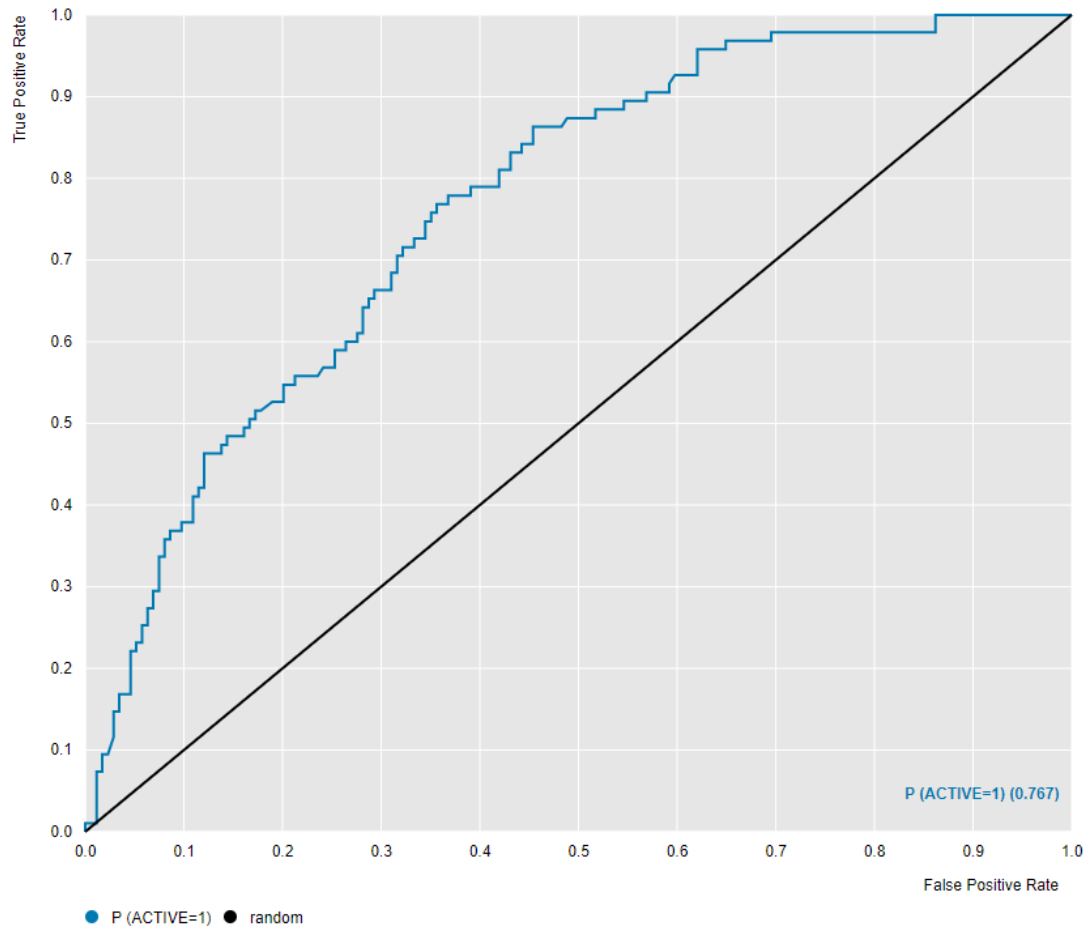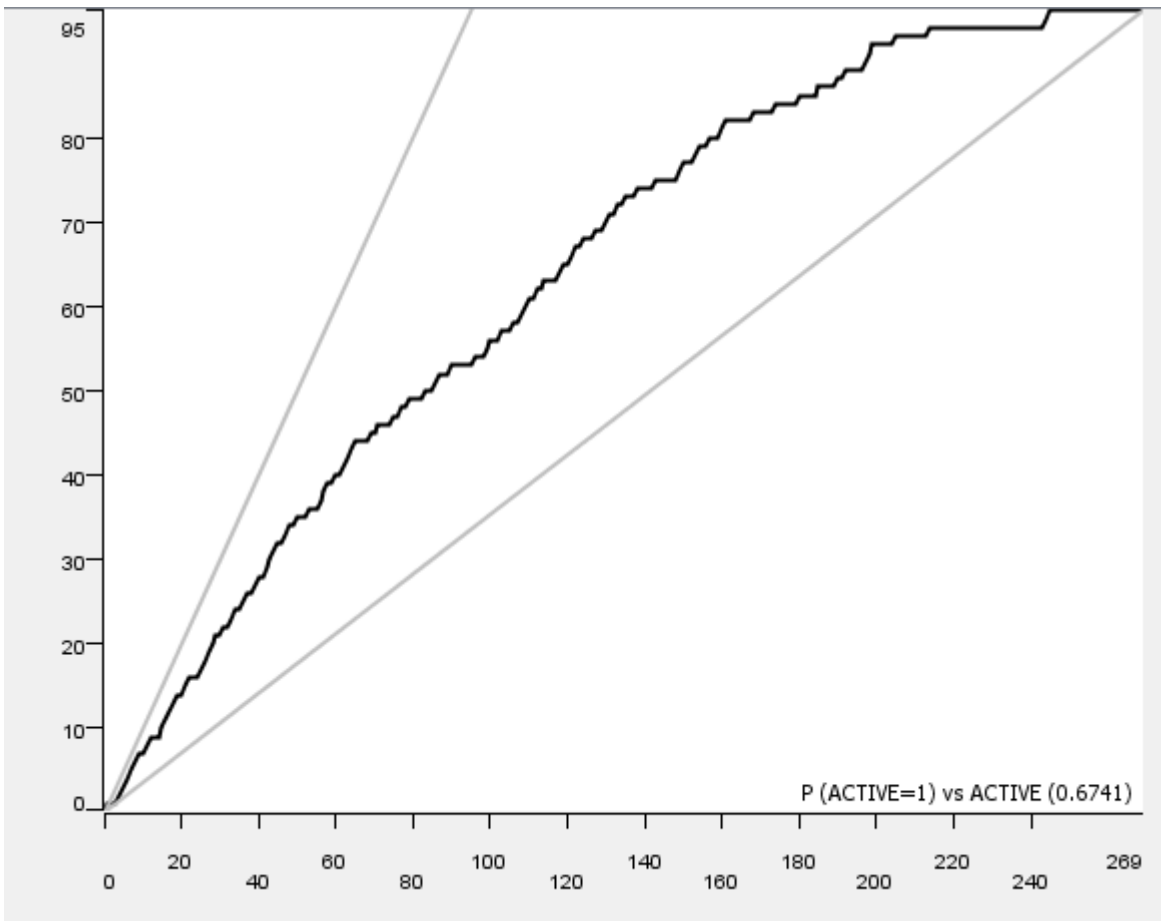

N=269

|                   |          |
|-------------------|----------|
| Top 10% Mean IC50 | 1,100 nM |
|-------------------|----------|

|          | Predicted Active | Predicted Inactive |
|----------|------------------|--------------------|
| Active   | 47               | 48                 |
| Inactive | 29               | 145                |

# PNN - <15 nM DefGood in AKL (parameterized (theta minus = 0.15; theta plus = 0.55)

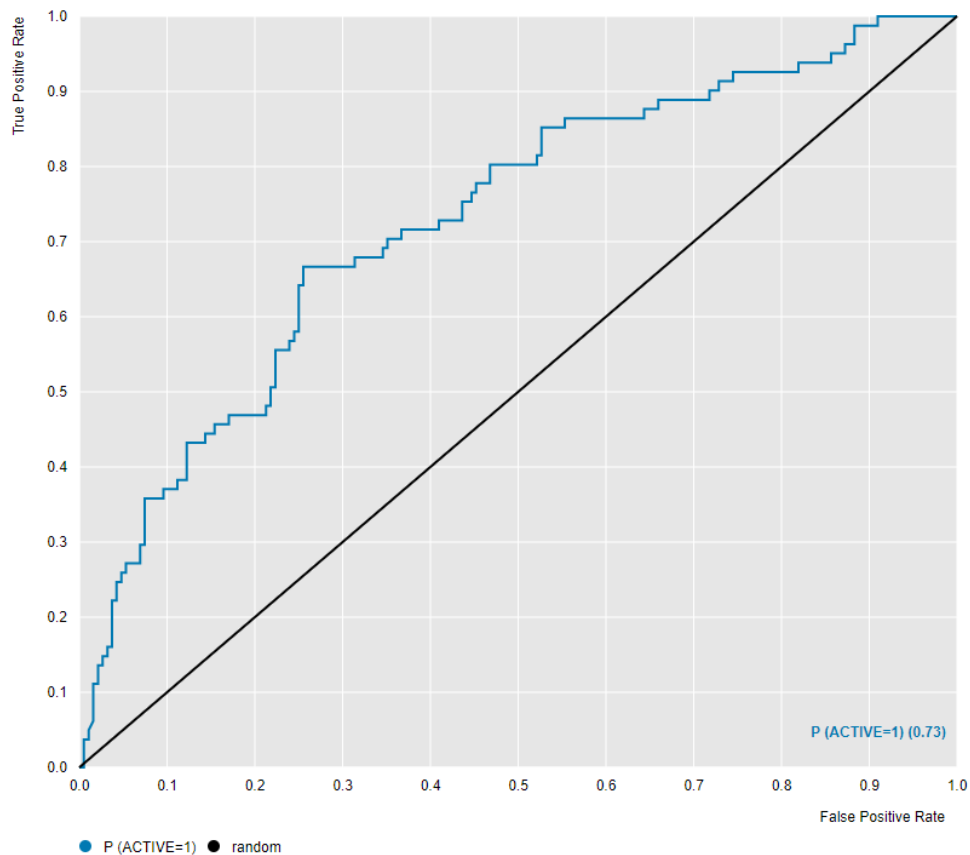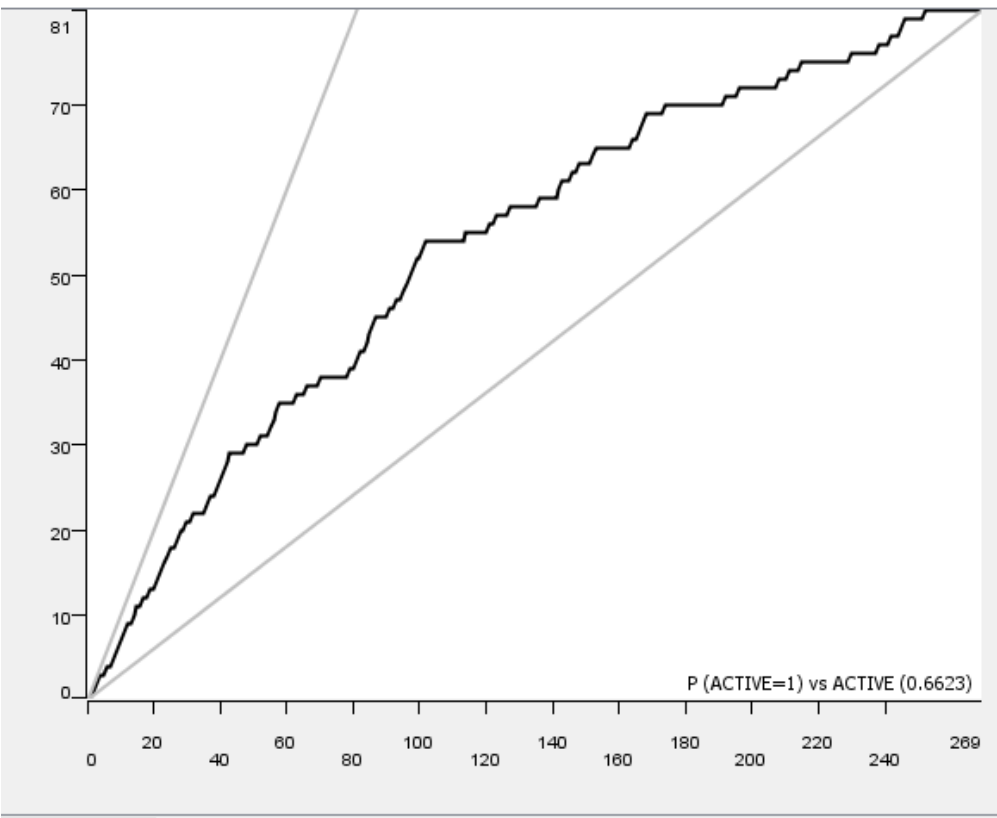

N=269

|                   |          |
|-------------------|----------|
| Top 10% Mean IC50 | 1,200 nM |
|-------------------|----------|

|          | Predicted Active | Predicted Inactive |
|----------|------------------|--------------------|
| Active   | 24               | 57                 |
| Inactive | 14               | 174                |



# PNN - <25 nM DefGood in AKL (parameterized (theta minus = 0.45; theta plus = 0.45)

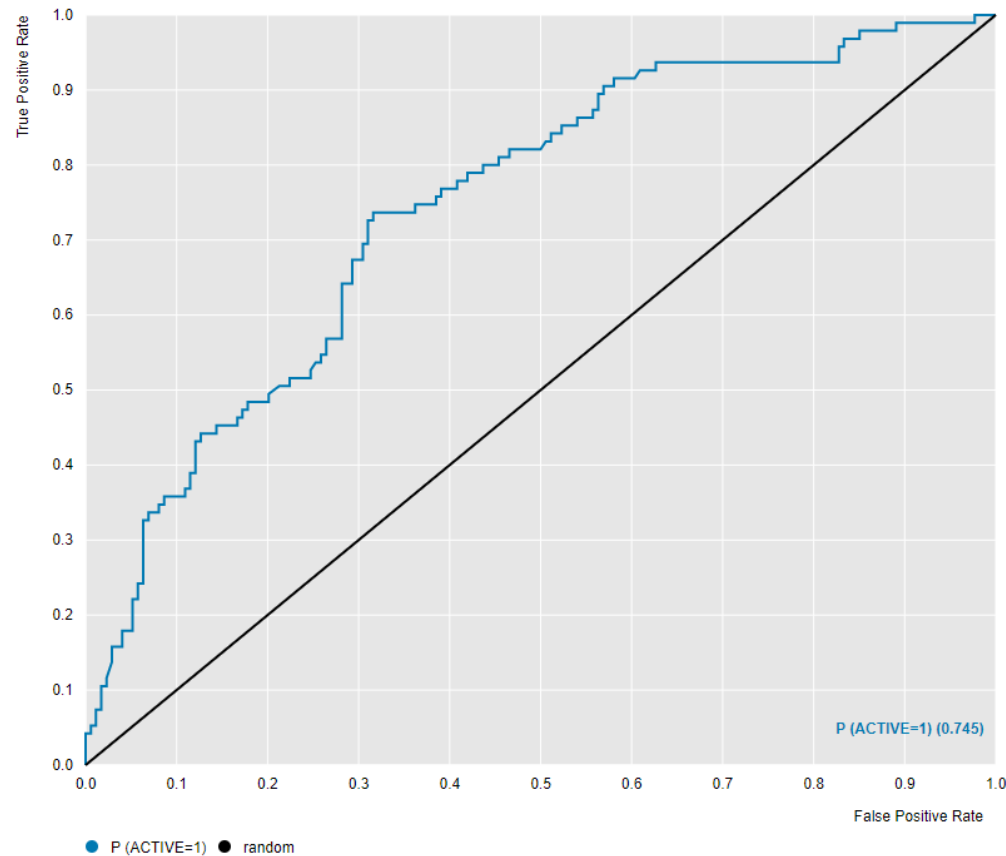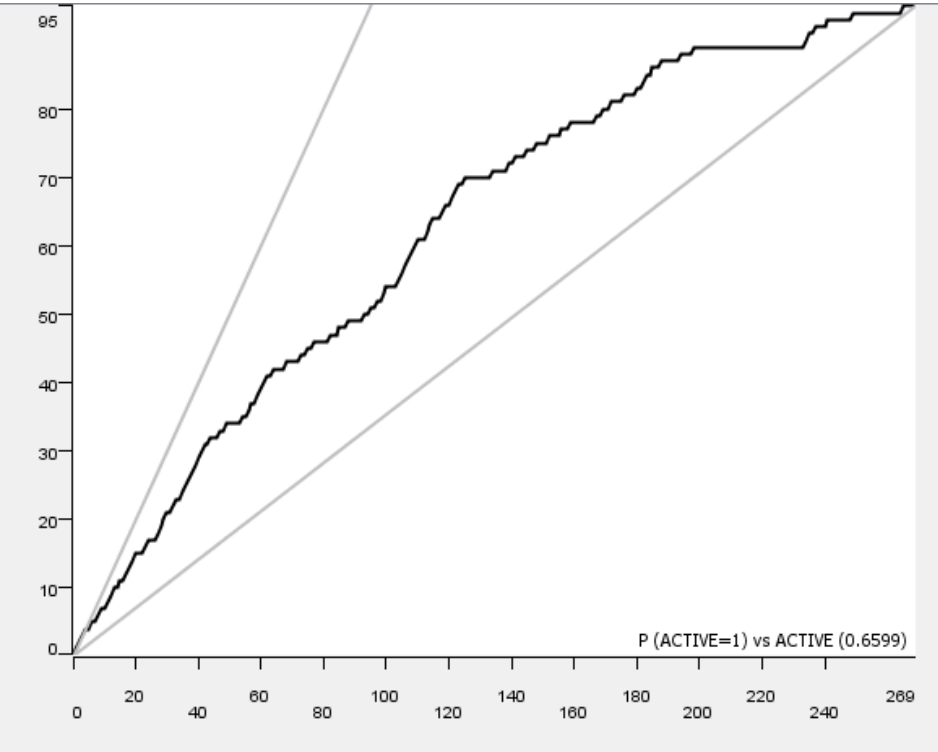

N=269

|                   |        |
|-------------------|--------|
| Top 10% Mean IC50 | 340 nM |
|-------------------|--------|

|          | Predicted Active | Predicted Inactive |
|----------|------------------|--------------------|
| Active   | 42               | 53                 |
| Inactive | 23               | 151                |

# Decision on DefGood - PNN

- <20 nM has the best performance overall. This mirrored the NBN DefGood, and the DefGood for the NBNs in the future will be used for the RFs as well. Parameterization for each model adds significant time to the process. A rough benchmark can be applied where point of failure is discovered and then the model is parameterized to ensure that the situation is optimal for the PNN.

# NBN Error Tolerance- <20 nM DefGood in AKL

- 0-50% absolute error

<20 nM DefGood in AKL, 5% error; Random seed = 1515533876005

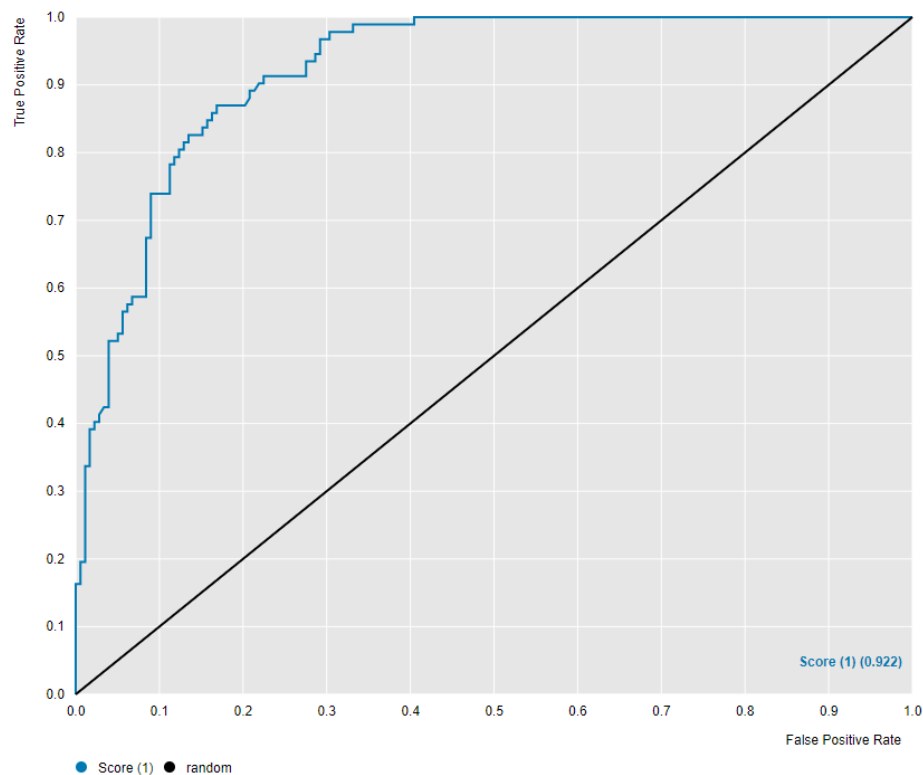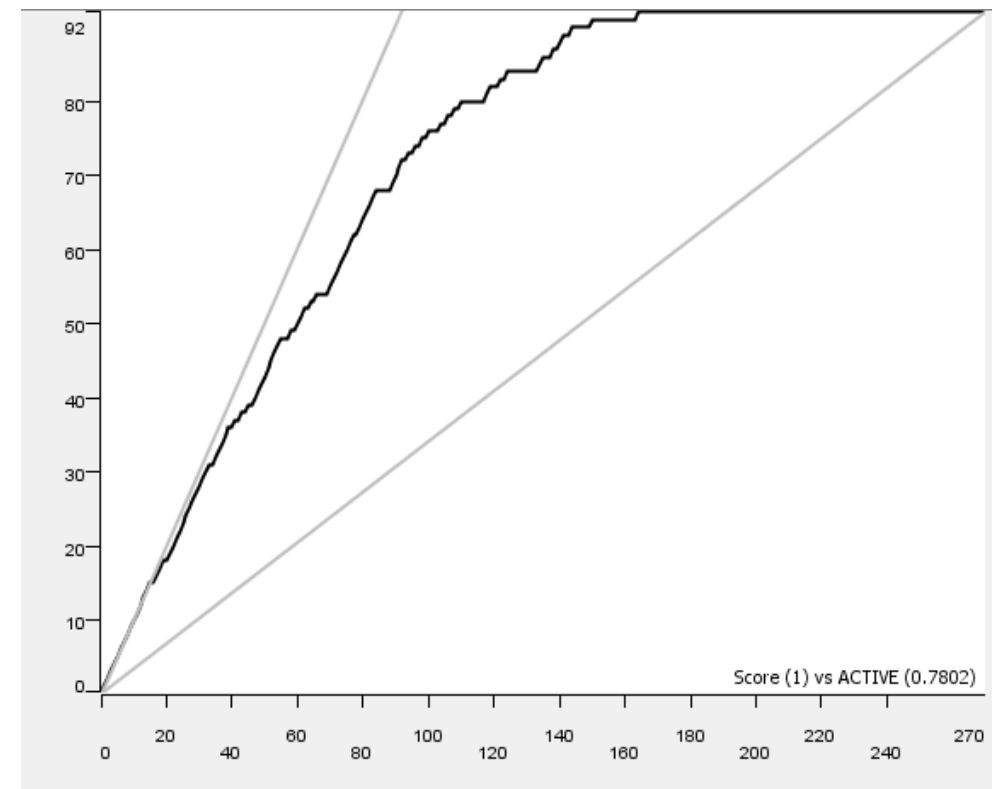

N=270

| Top 10% Mean IC50 | 6.9 |
|-------------------|-----|
|-------------------|-----|

|          | Predicted Active | Predicted Inactive |
|----------|------------------|--------------------|
| Active   | 80               | 12                 |
| Inactive | 35               | 143                |

# <20 nM DefGood in ALK, 10% error

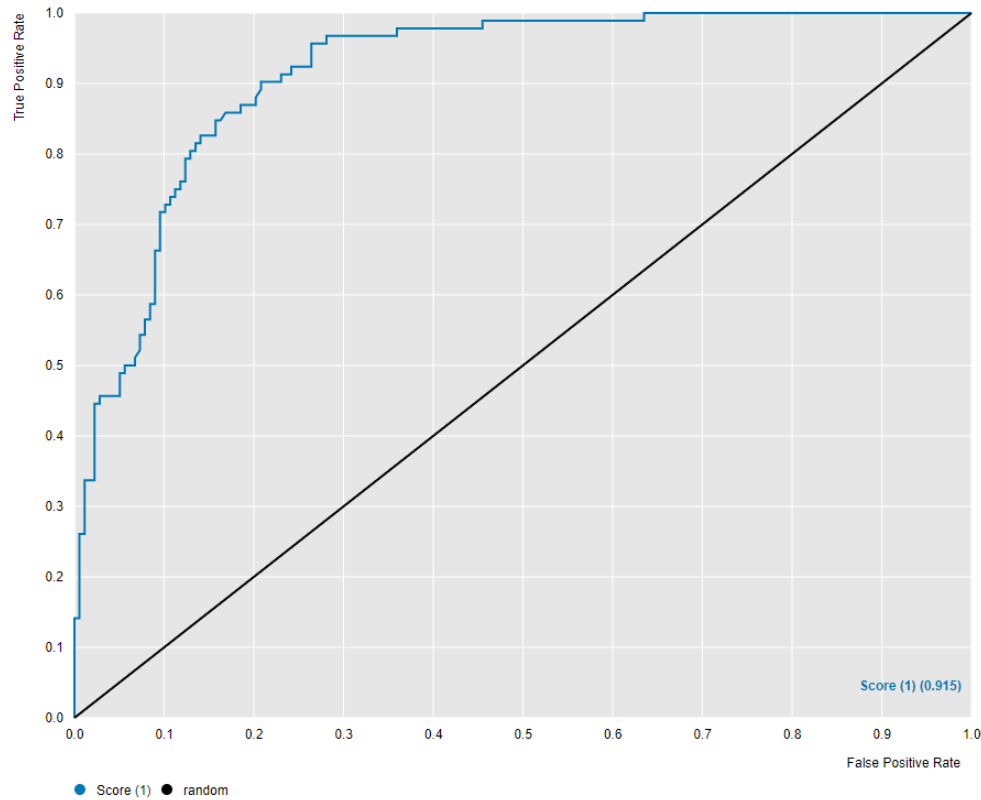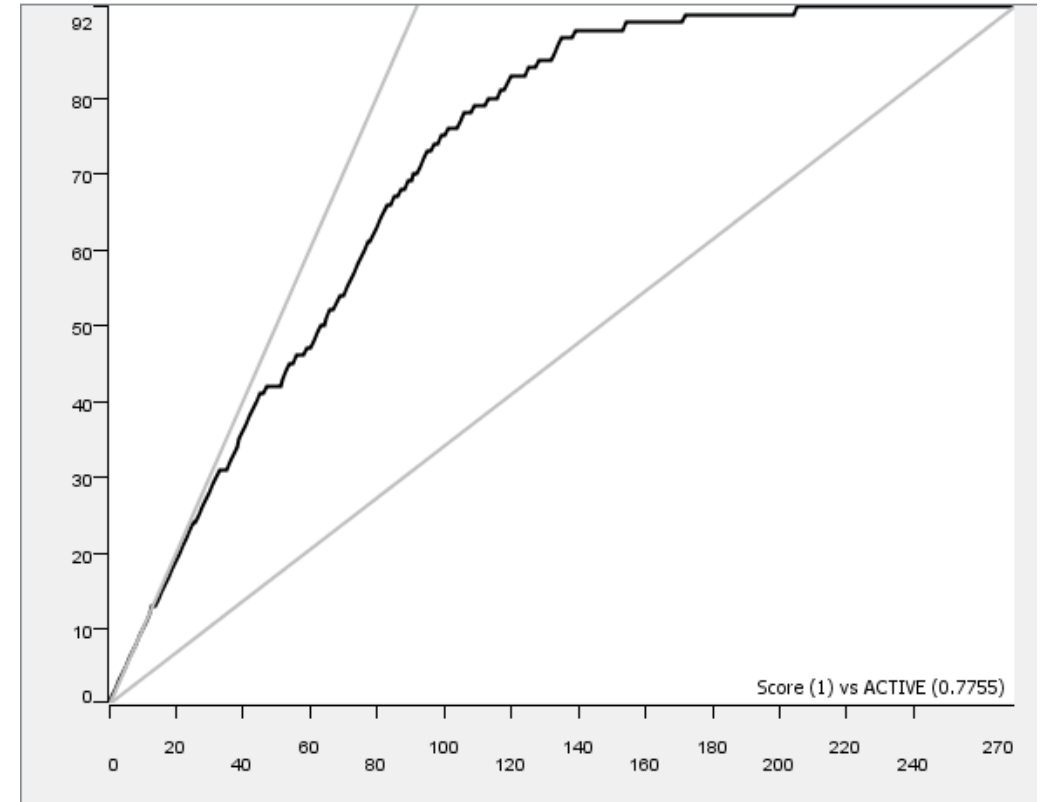

N=270

| Top 10% Mean IC50 | 7.3 nM |
|-------------------|--------|
|-------------------|--------|

|          | Predicted Active | Predicted Inactive |
|----------|------------------|--------------------|
| Active   | 83               | 9                  |
| Inactive | 37               | 141                |

# <20 nM DefGood in ALK, 15% error

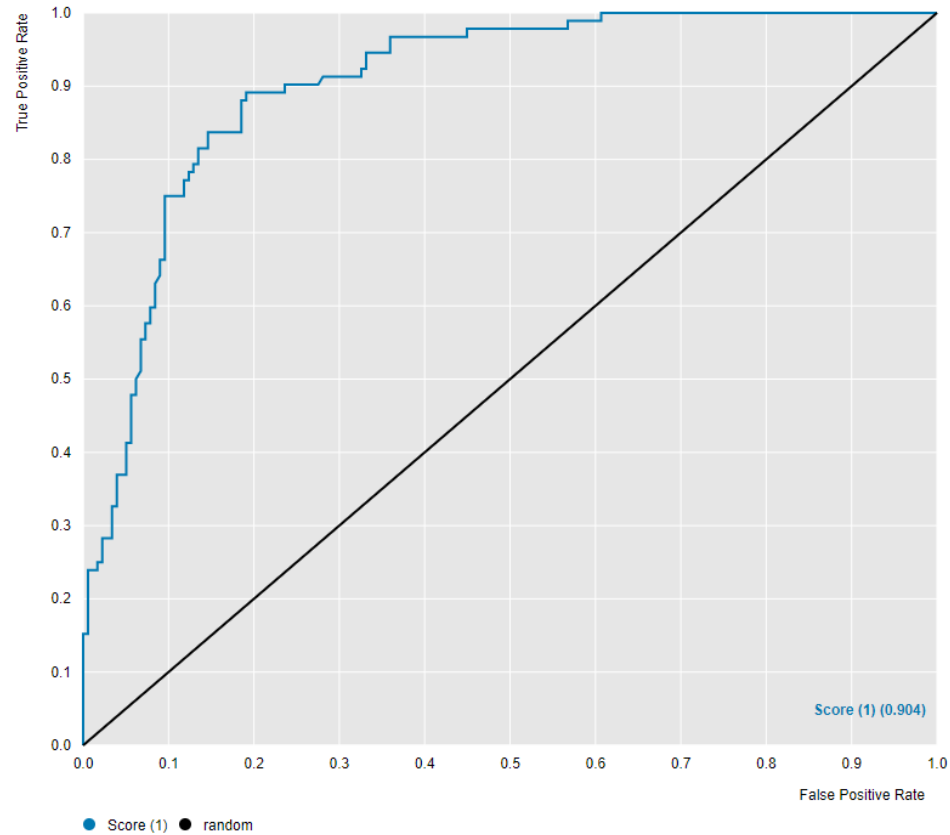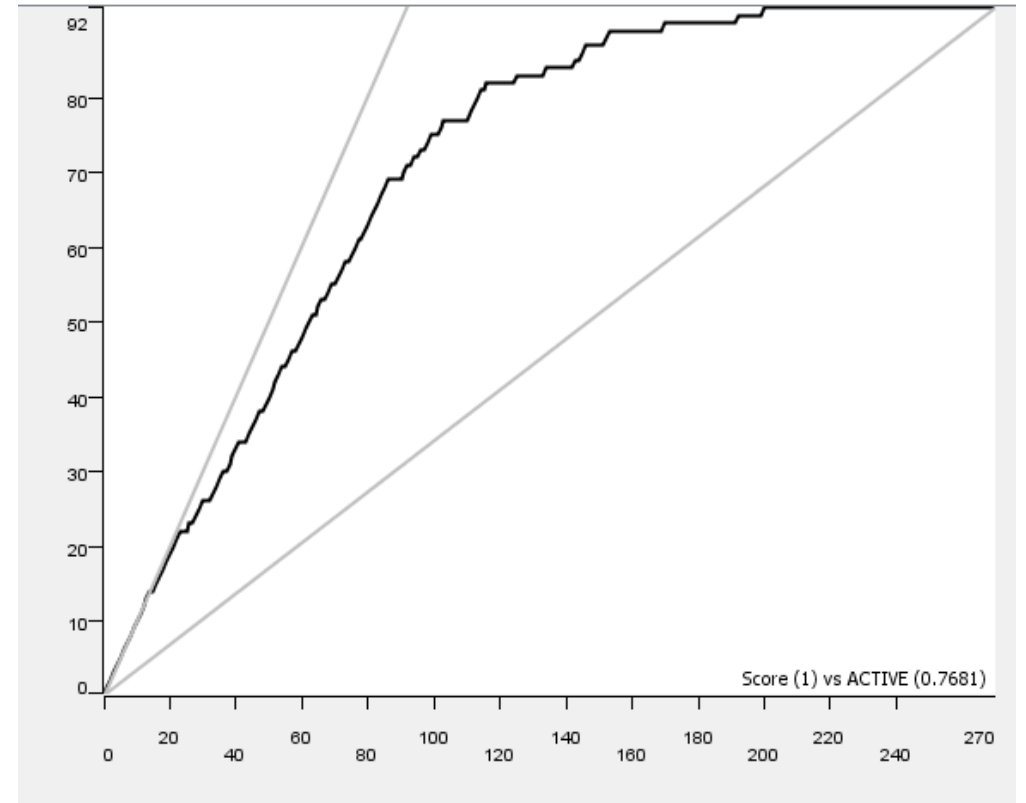

N=270

| Top 10% Mean IC50 | 20.1 nM |
|-------------------|---------|
|-------------------|---------|

|          | Predicted Active | Predicted Inactive |
|----------|------------------|--------------------|
| Active   | 82               | 10                 |
| Inactive | 40               | 138                |

# <20 nM DefGood in ALK, 20% error

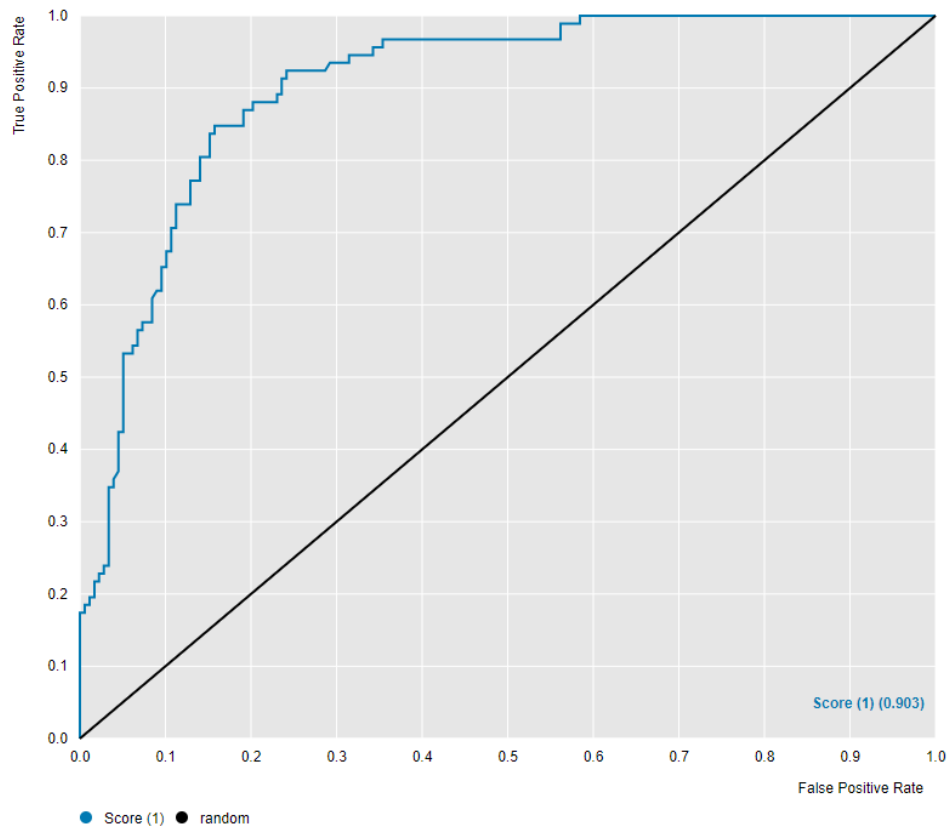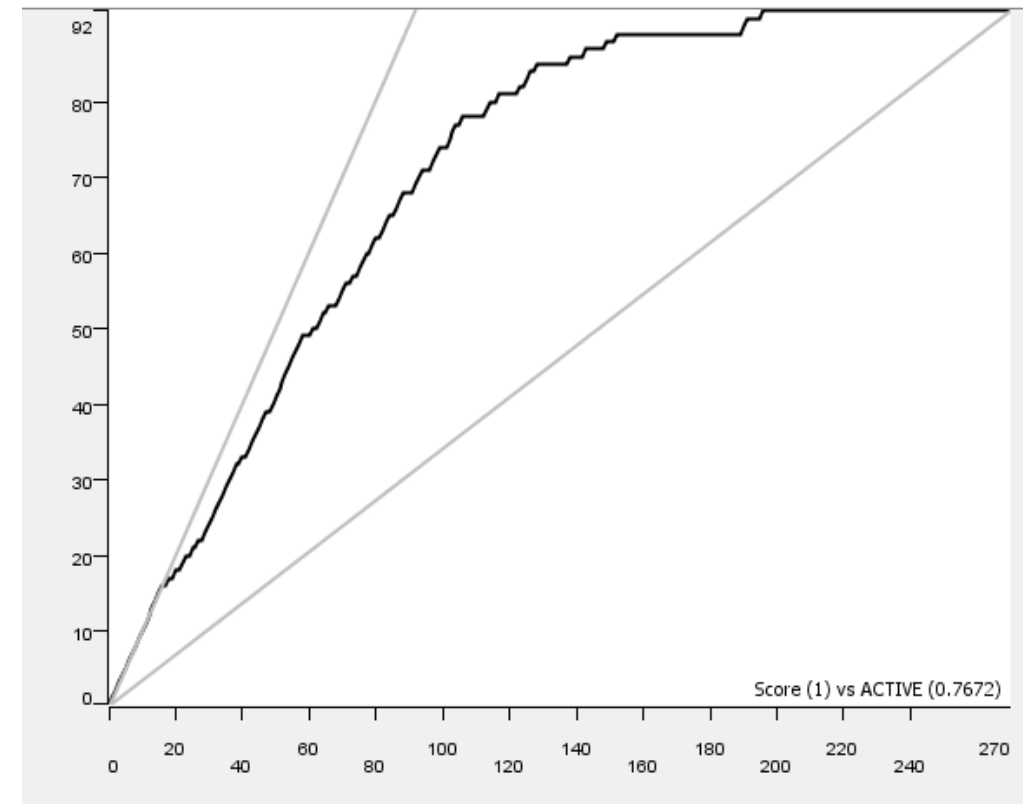

N=270

| Top 10% Mean IC50 | 13.0 nM |
|-------------------|---------|
|-------------------|---------|

|          | Predicted Active | Predicted Inactive |
|----------|------------------|--------------------|
| Active   | 82               | 10                 |
| Inactive | 42               | 136                |

# <20 nM DefGood in ALK, 30% error

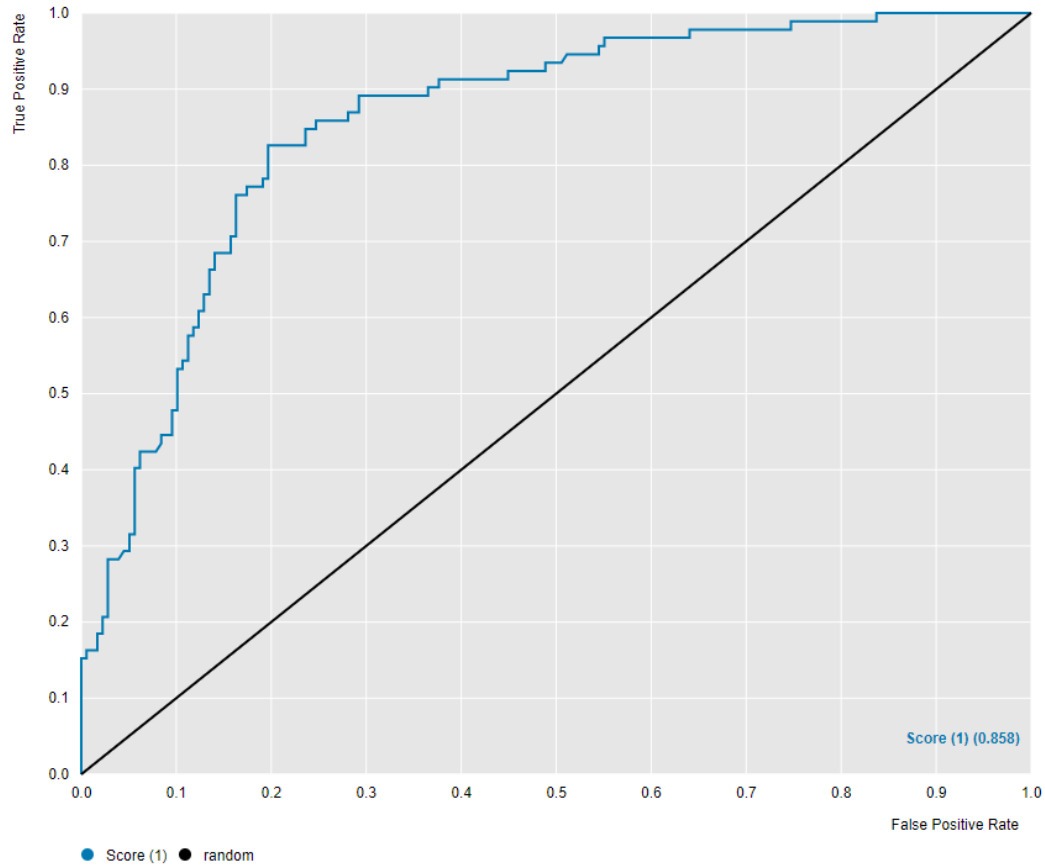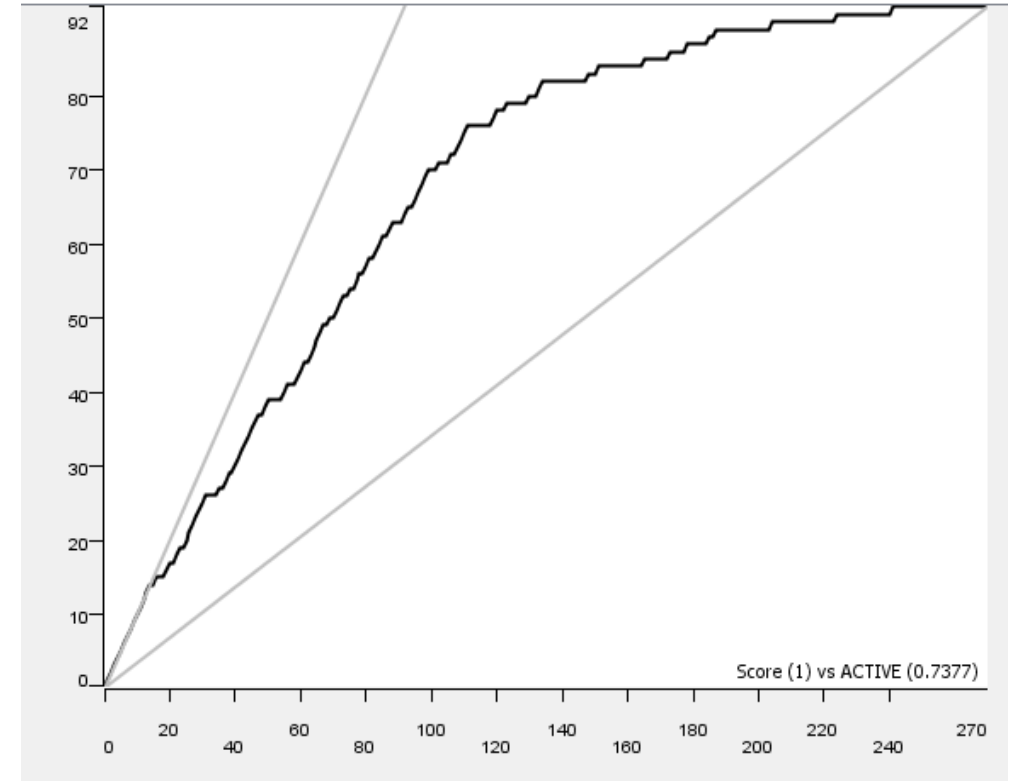

N=270

Top 10% Mean  
IC50

13.8 nM

|          | Predicted Active | Predicted Inactive |
|----------|------------------|--------------------|
| Active   | 78               | 14                 |
| Inactive | 43               | 135                |



# <20 nM DefGood in ALK, 40% error

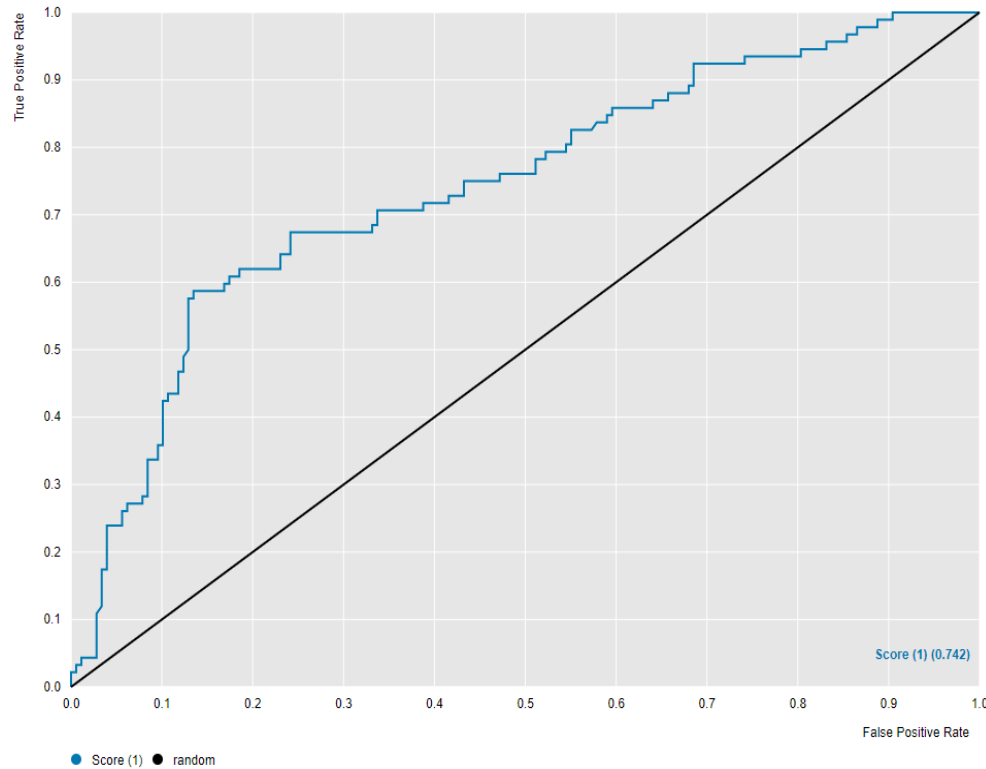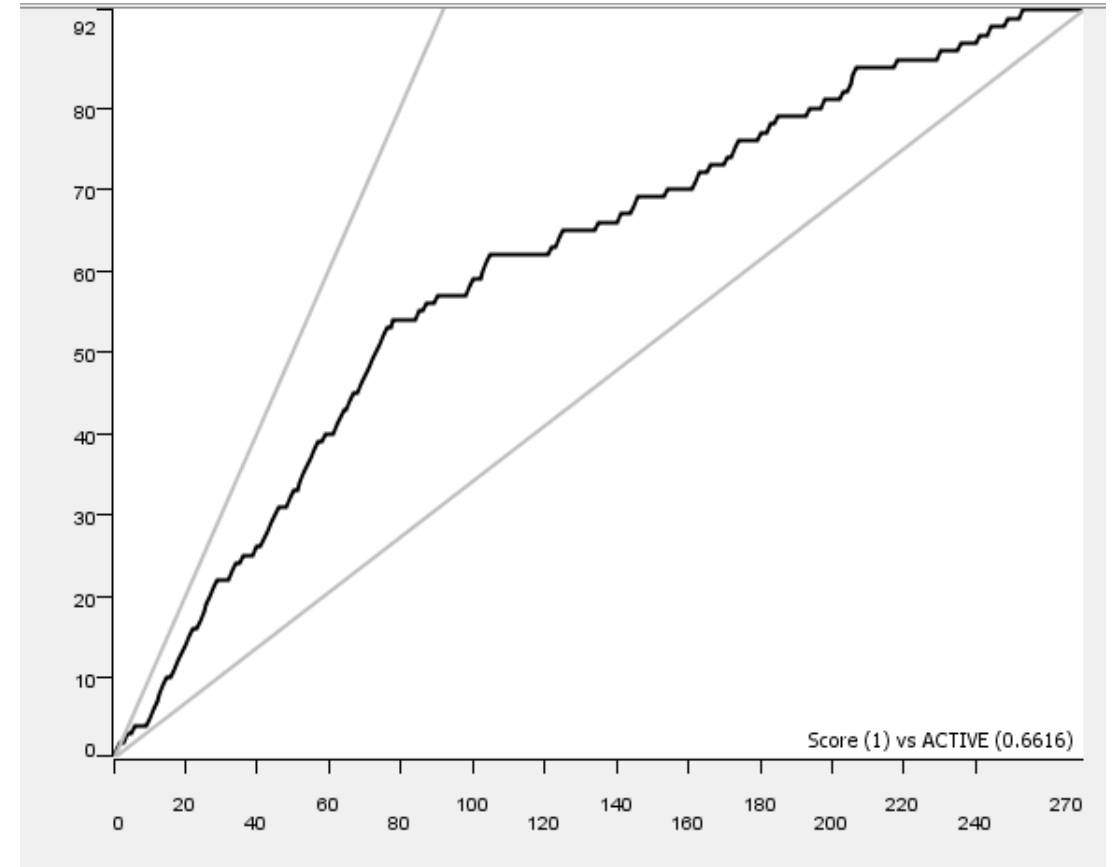

N=270

|                      |         |
|----------------------|---------|
| Top 10% Mean<br>IC50 | 53.5 Nm |
|----------------------|---------|

|          | Predicted Active | Predicted Inactive |
|----------|------------------|--------------------|
| Active   | 82               | 30                 |
| Inactive | 55               | 123                |

# <20 nM DefGood in ALK, 45% error

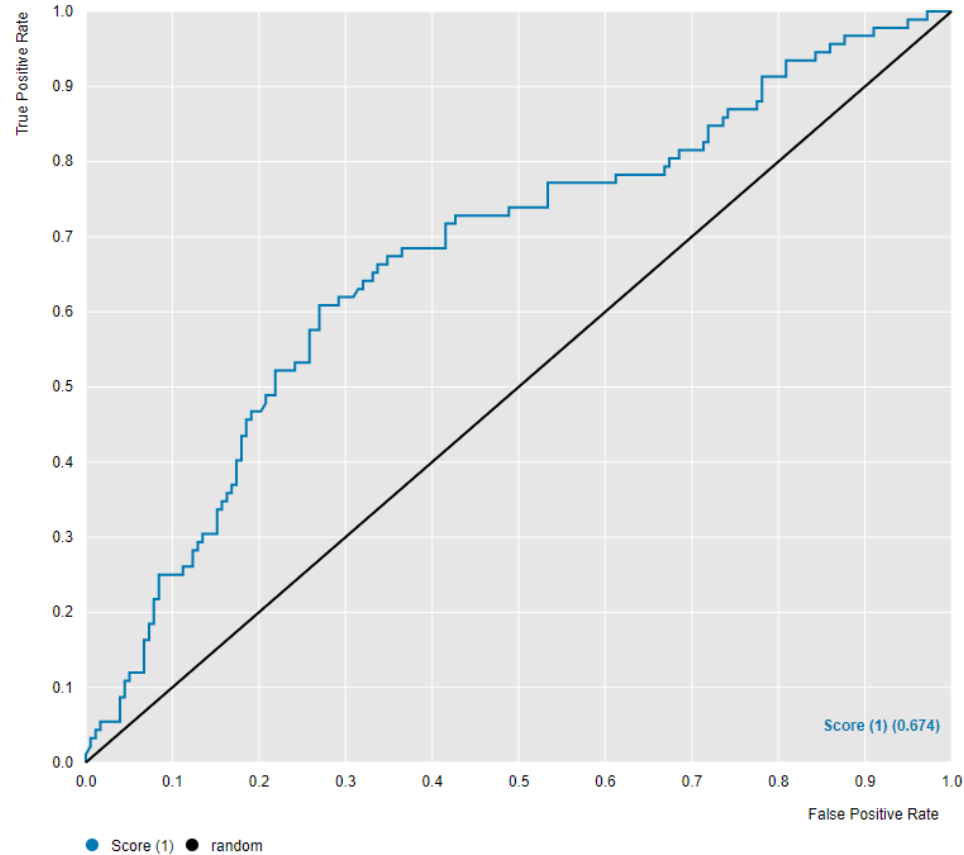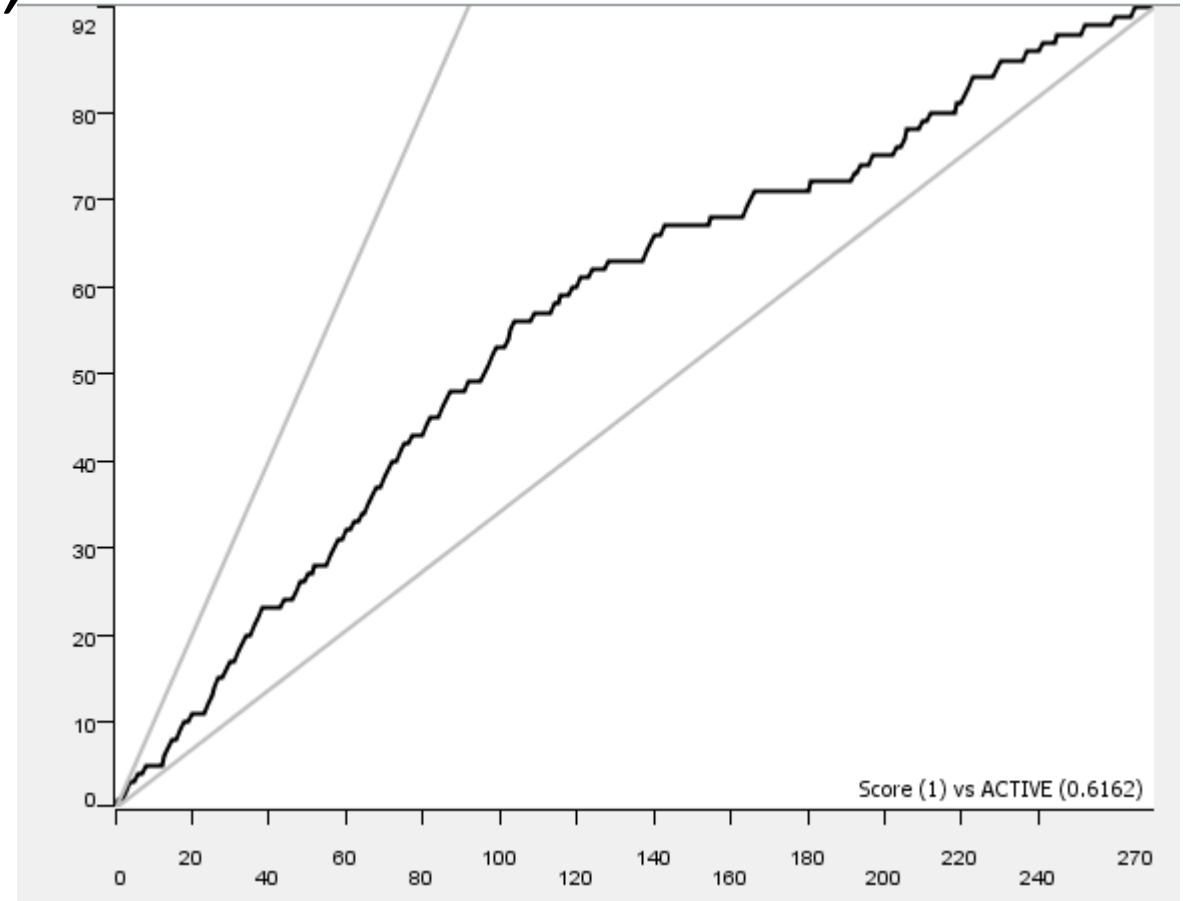

N=270

|                   |          |
|-------------------|----------|
| Top 10% Mean IC50 | 1,400 Nm |
|-------------------|----------|

|          | Predicted Active | Predicted Inactive |
|----------|------------------|--------------------|
| Active   | 71               | 21                 |
| Inactive | 96               | 82                 |

<20 nM DefGood in ALK, 10% error; Random seed = 429

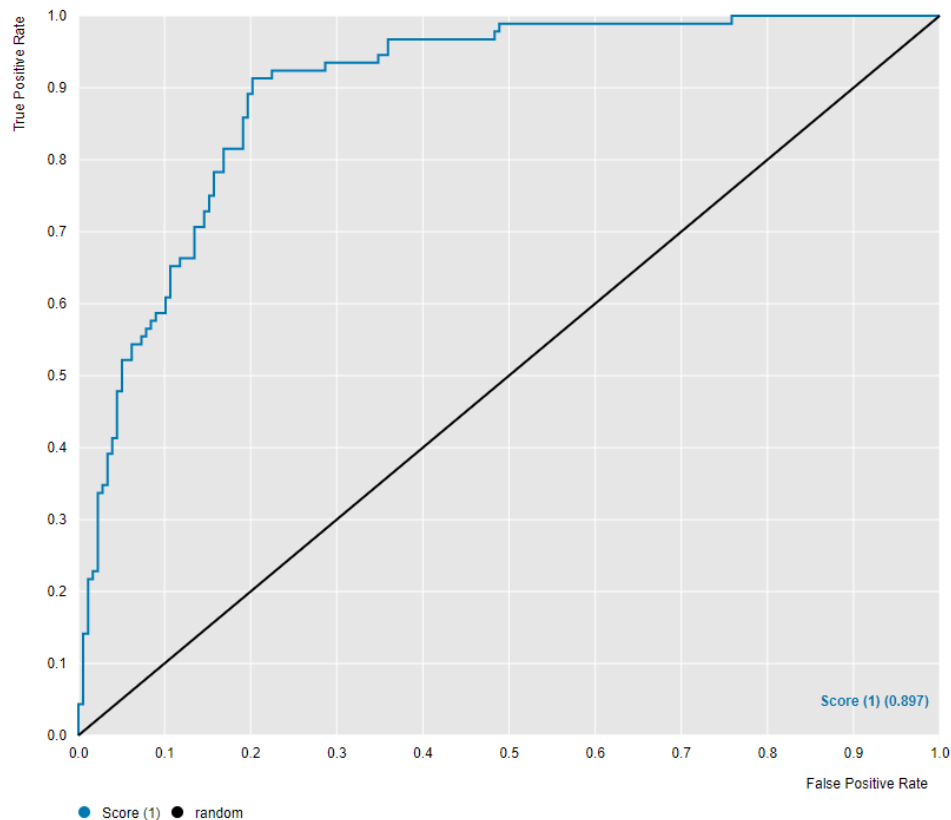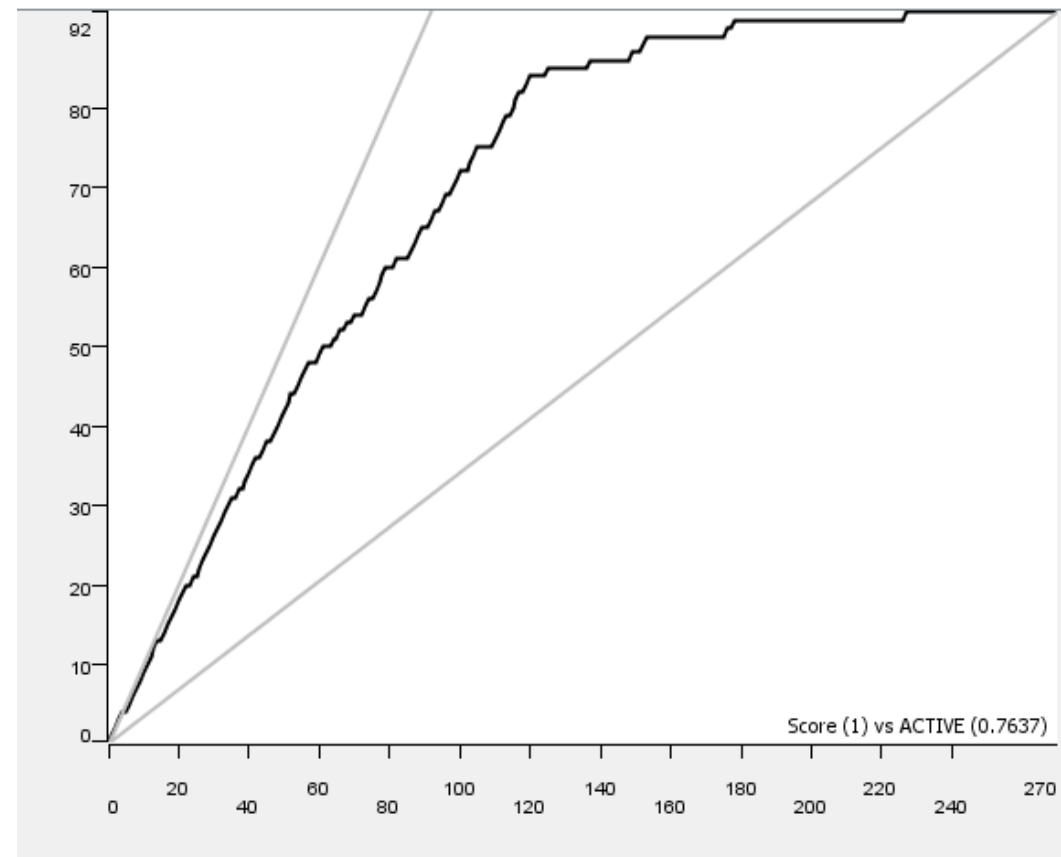

N=270

Top 10% Mean  
IC50

22.3 nM

|          | Predicted Active | Predicted Inactive |
|----------|------------------|--------------------|
| Active   | 83               | 9                  |
| Inactive | 36               | 142                |

<20 nM DefGood in ALK, 20% error; Random seed = 429

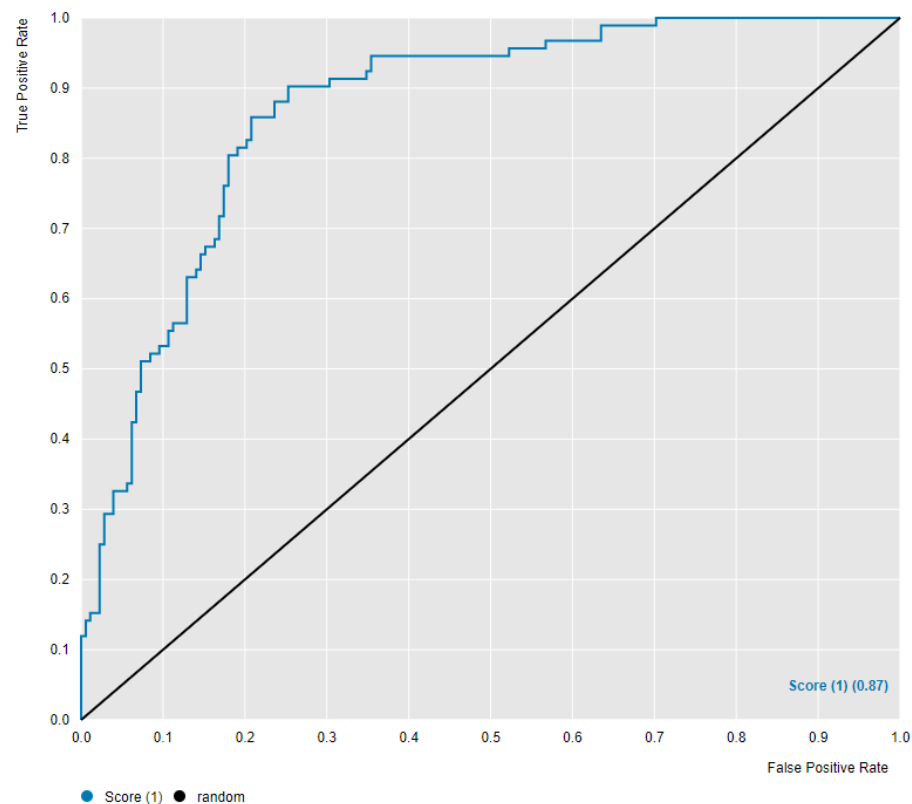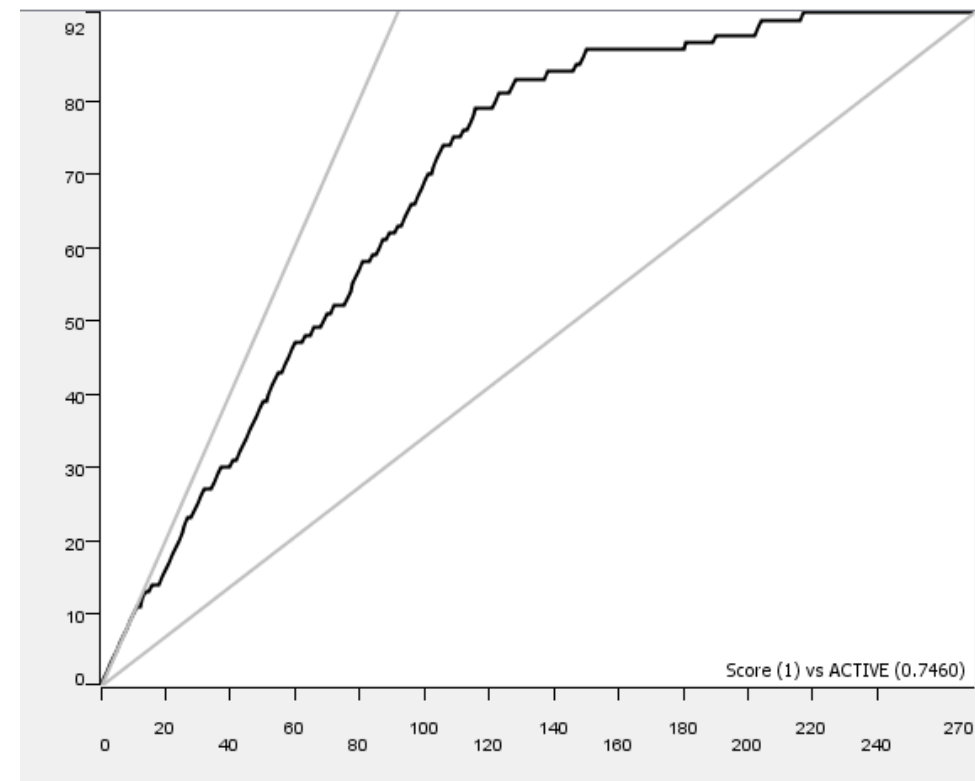

N=270

Top 10% Mean  
IC50

22.9 nM

|          | Predicted Active | Predicted Inactive |
|----------|------------------|--------------------|
| Active   | 81               | 11                 |
| Inactive | 44               | 134                |

<20 nM DefGood in ALK, 30% error; Random seed = 429

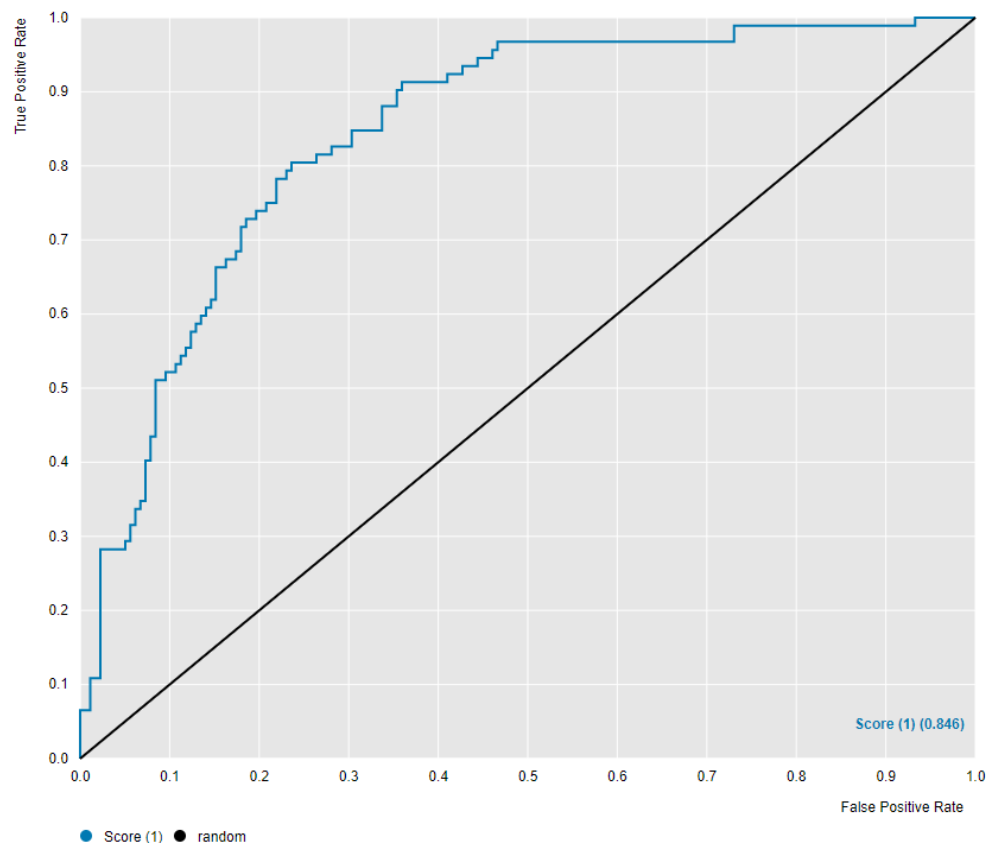

N=270

|                   |         |
|-------------------|---------|
| Top 10% Mean IC50 | 22.4 nM |
|-------------------|---------|

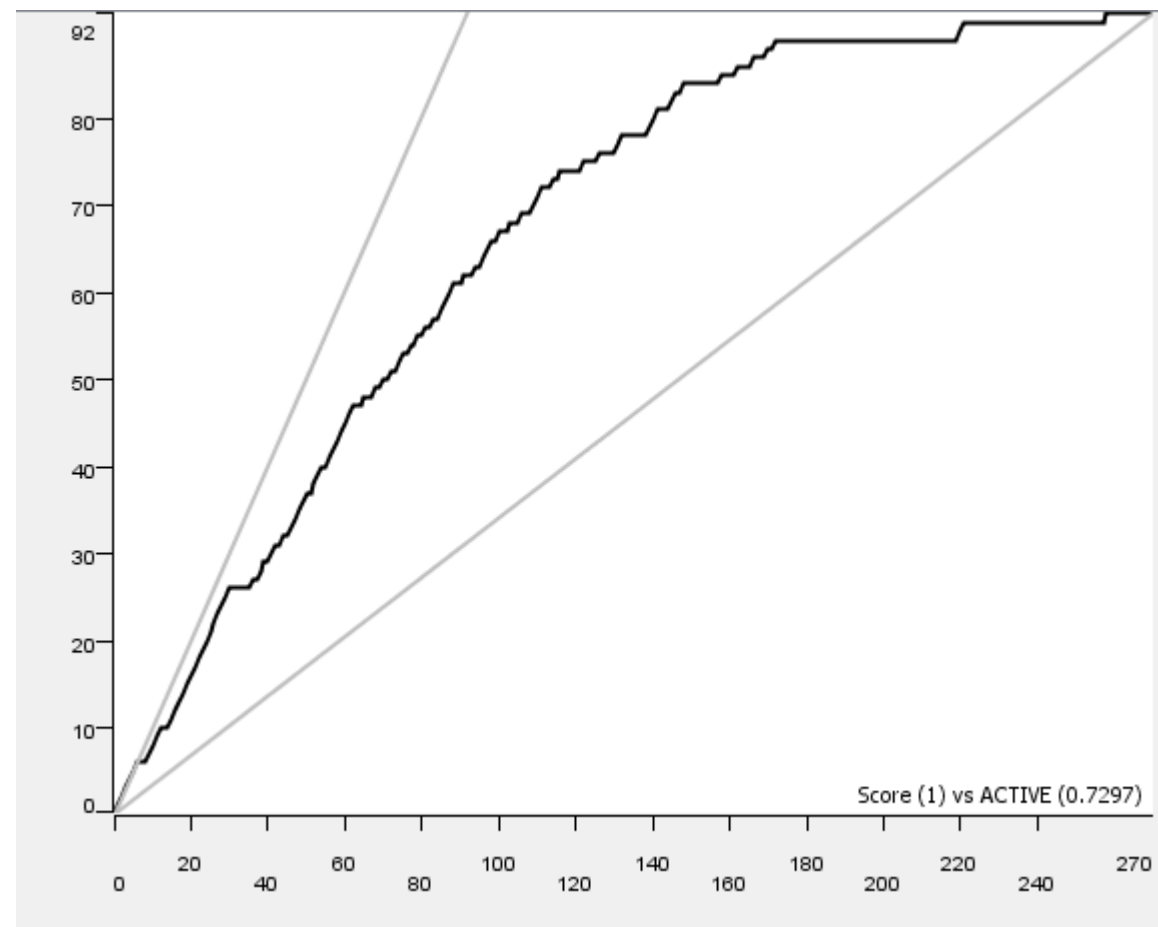

|          | Predicted Active | Predicted Inactive |
|----------|------------------|--------------------|
| Active   | 69               | 23                 |
| Inactive | 38               | 140                |

<20 nM DefGood in ALK, 40% error; Random seed = 429

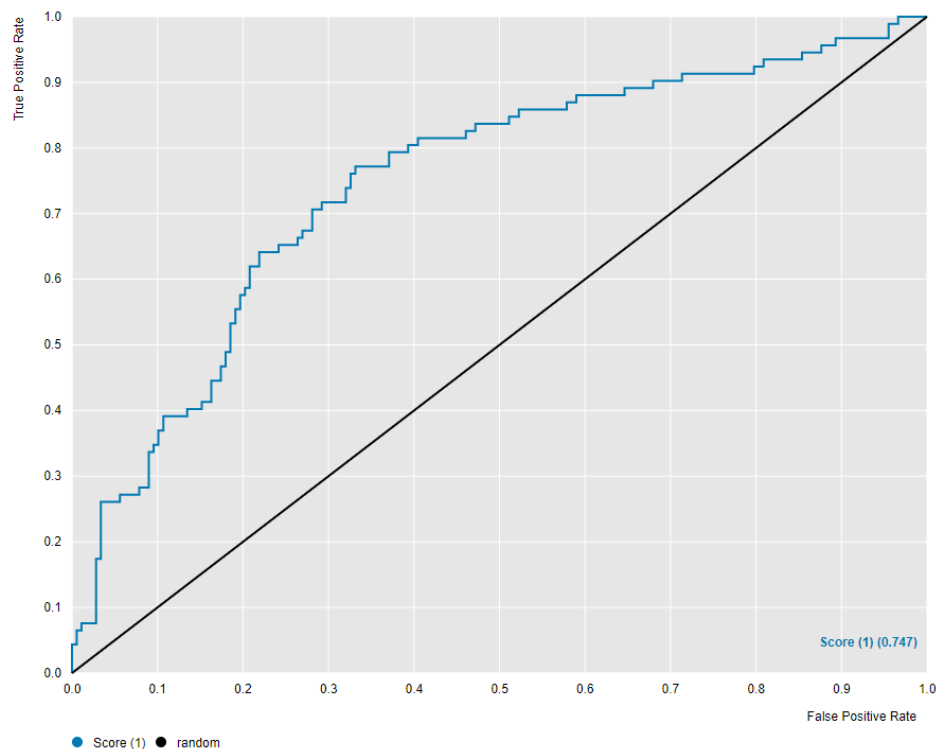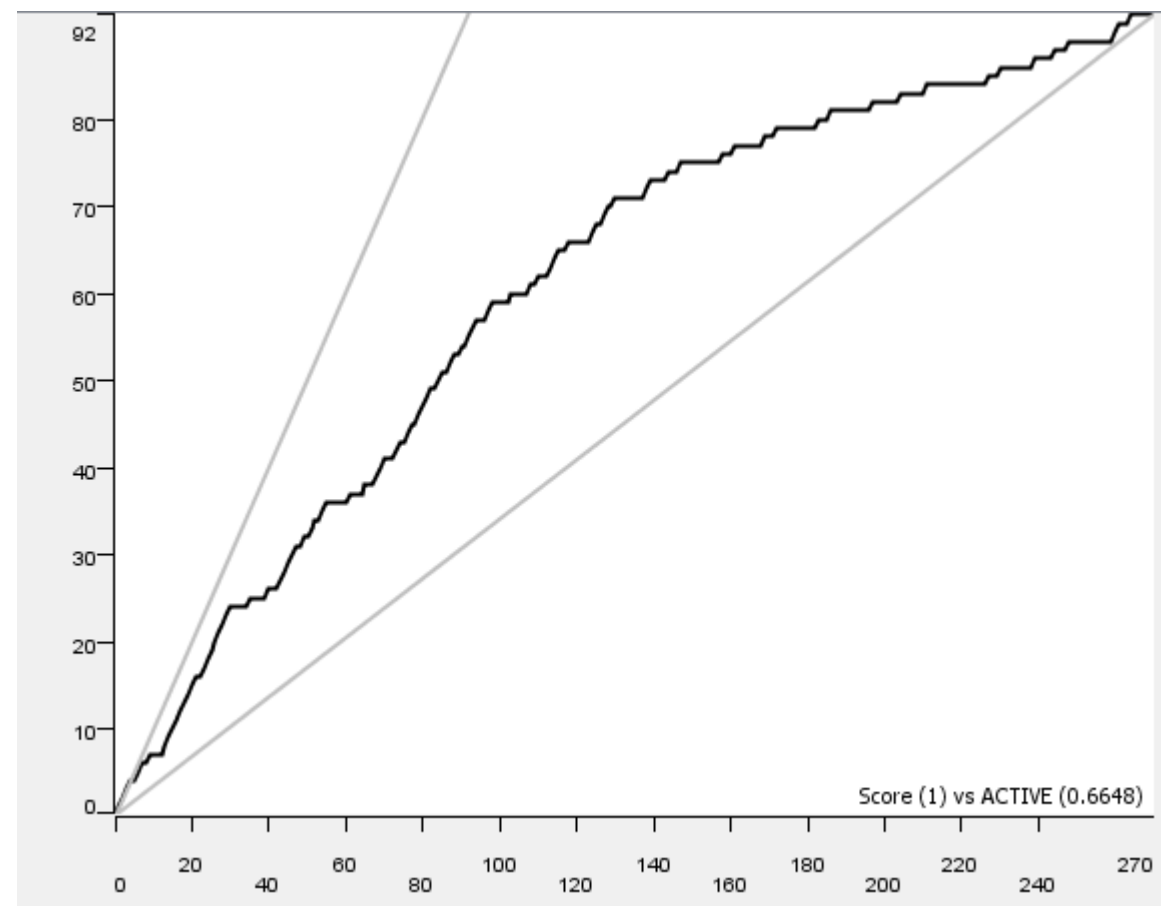

N=270

|                   |                                  |
|-------------------|----------------------------------|
| Top 10% Mean IC50 | 280 nM<br>(one 6,000 nM mistake) |
|-------------------|----------------------------------|

|          | Predicted Active | Predicted Inactive |
|----------|------------------|--------------------|
| Active   | 32               | 60                 |
| Inactive | 17               | 161                |

<20 nM DefGood in ALK, 45% error; Random seed = 429

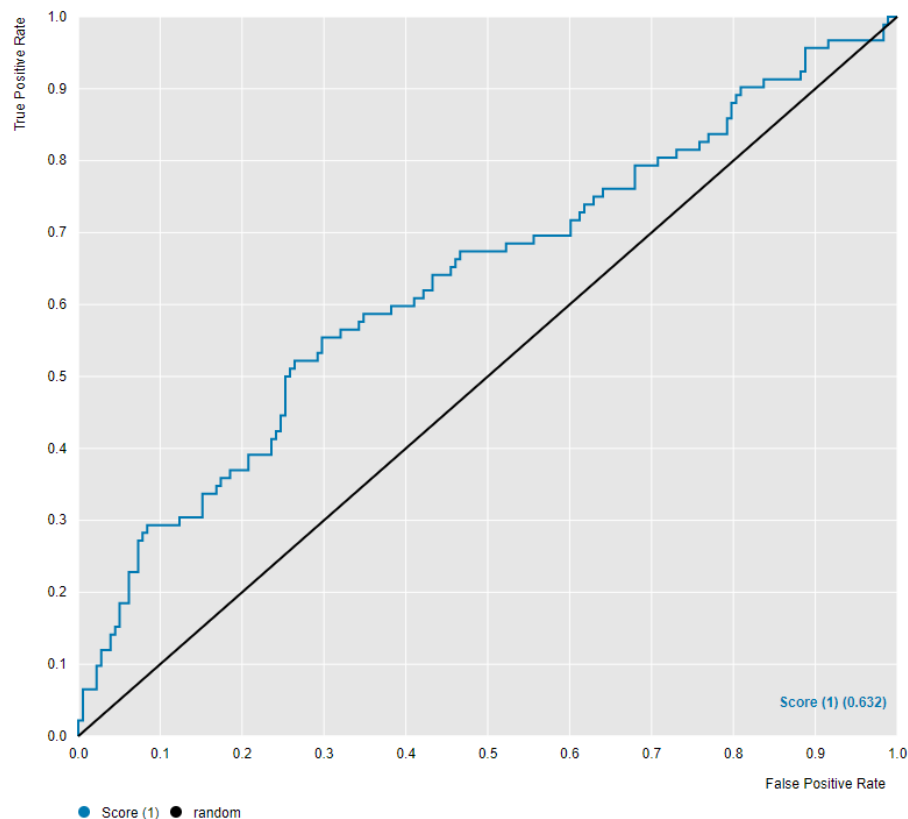

N=270

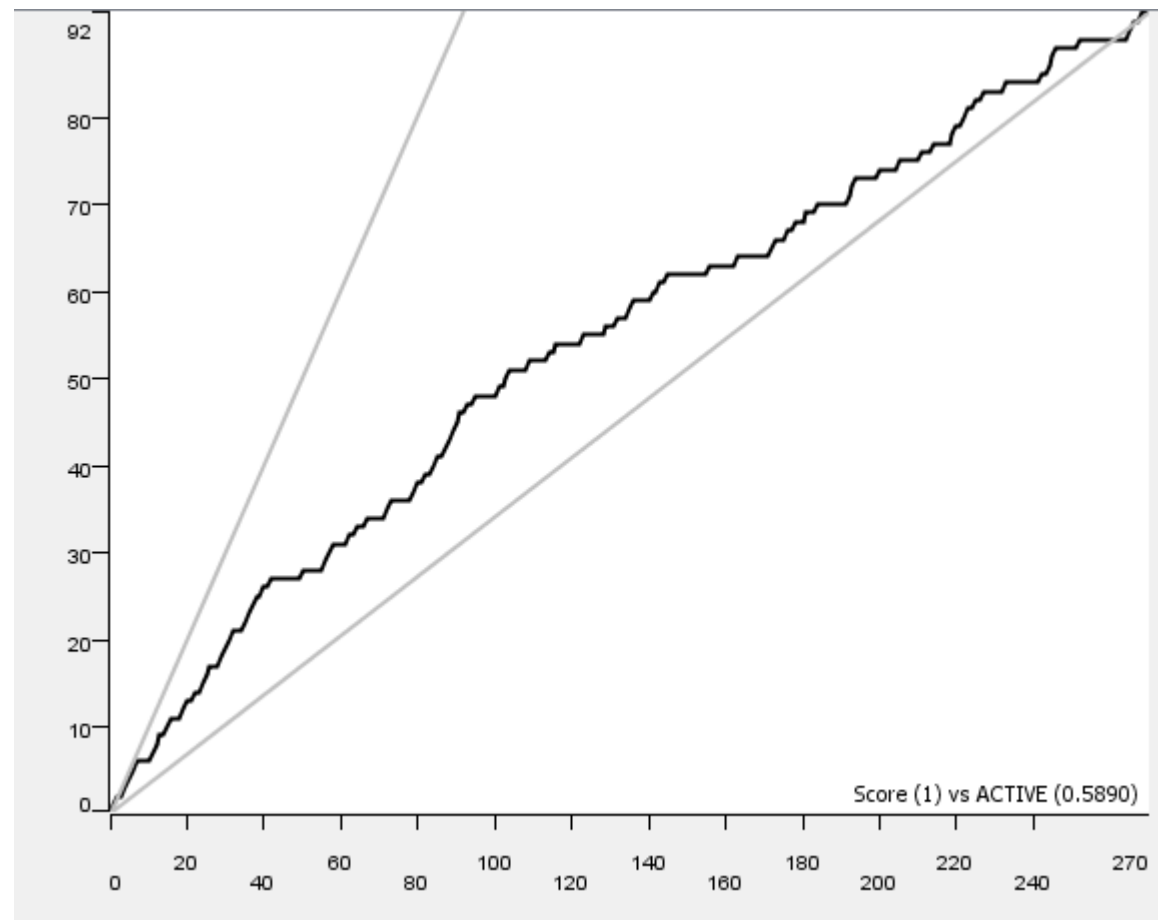

Top 10% Mean  
IC50

900 nM  
Several severe  
mistakes

|          | Predicted Active | Predicted Inactive |
|----------|------------------|--------------------|
| Active   | 17               | 75                 |
| Inactive | 10               | 168                |

<20 nM DefGood in ALK, 10% error; Random seed = 121783

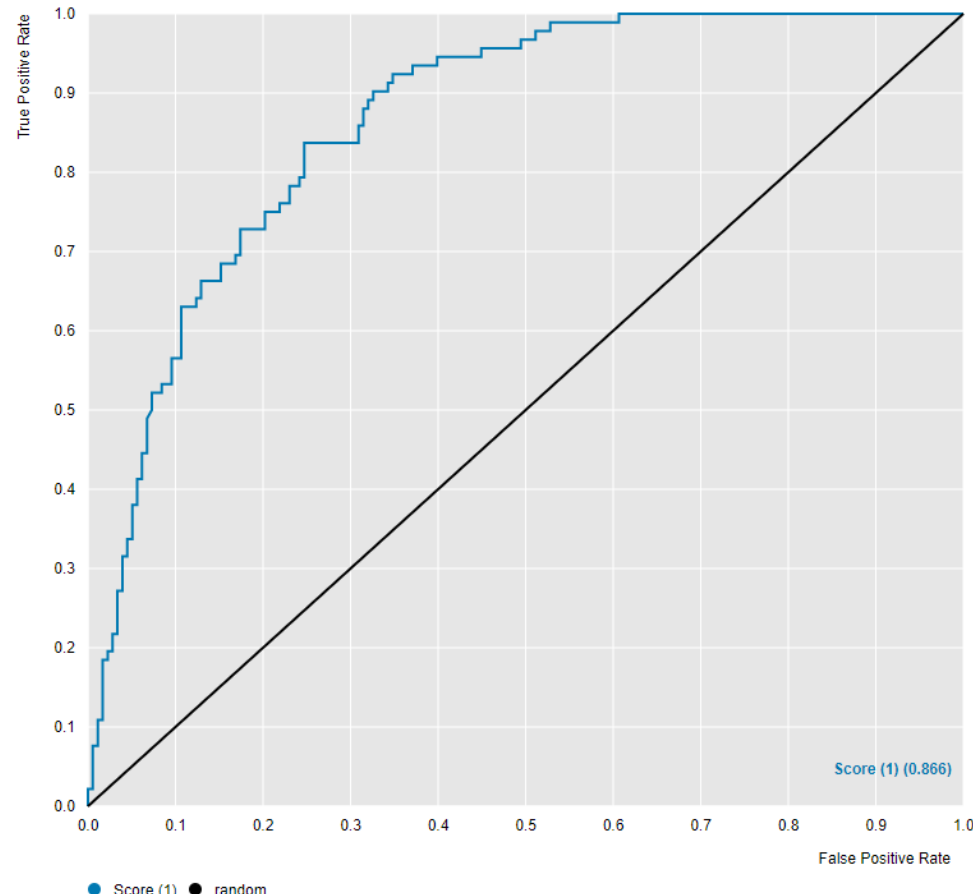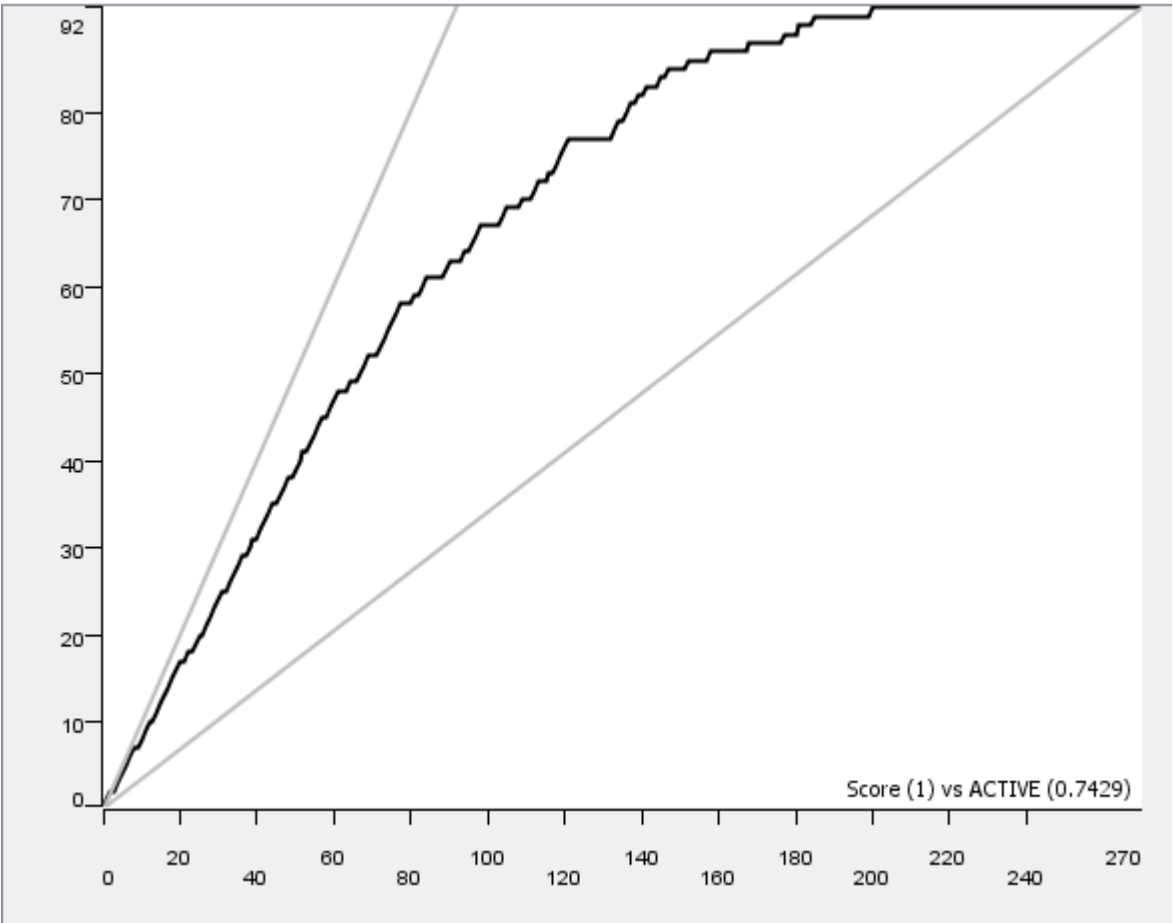

N=270

|                   |       |
|-------------------|-------|
| Top 10% Mean IC50 | 21 nM |
|-------------------|-------|

|          | Predicted Active | Predicted Inactive |
|----------|------------------|--------------------|
| Active   | 81               | 11                 |
| Inactive | 56               | 122                |



<20 nM DefGood in ALK, 20% error; Random seed = 121783

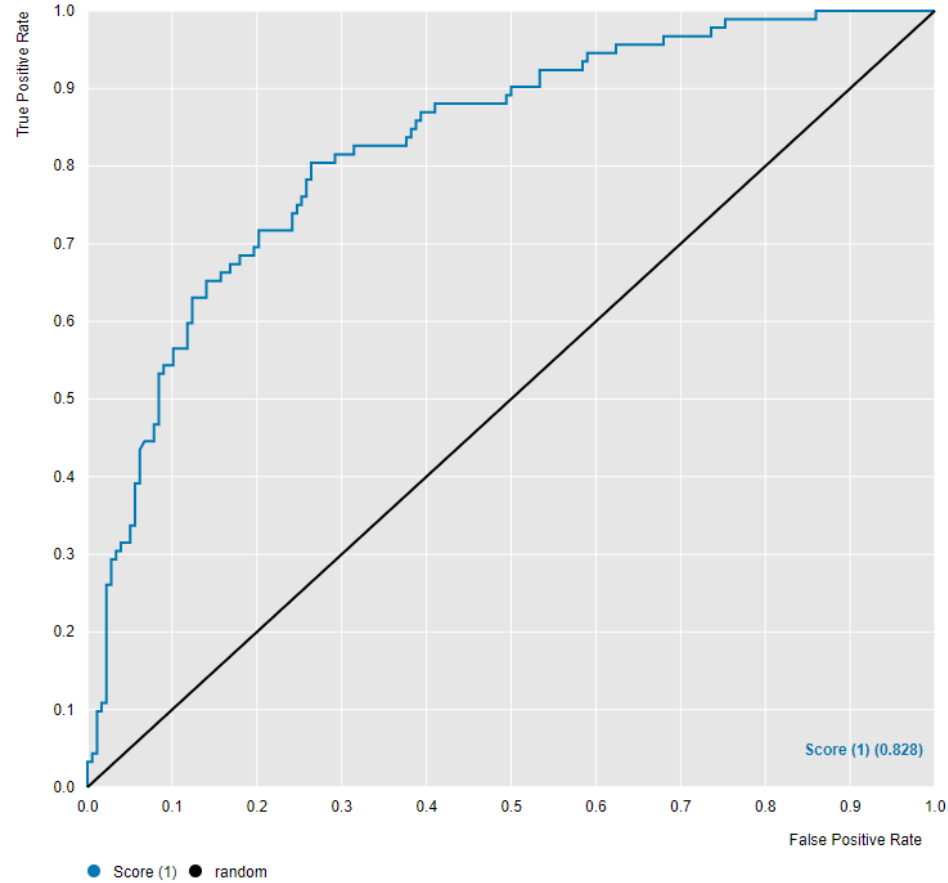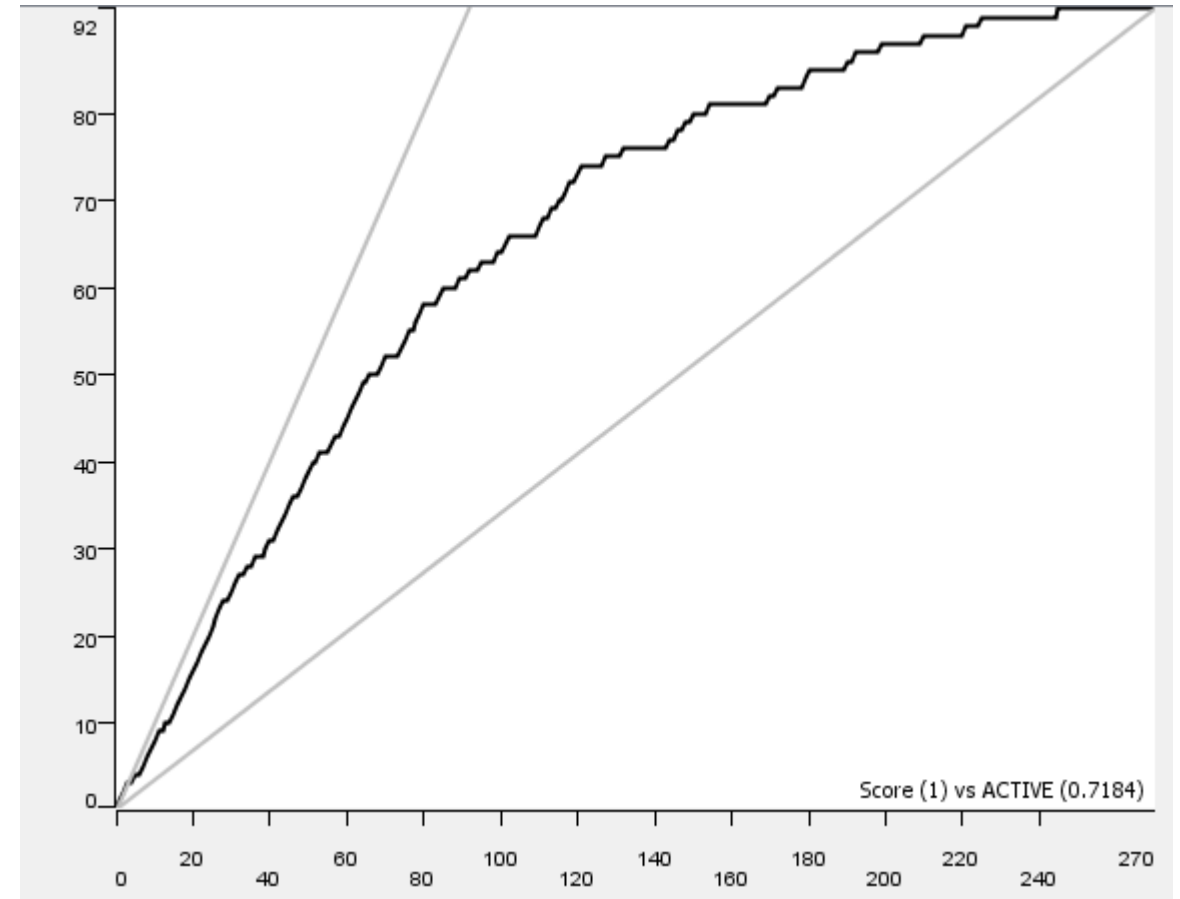

N=270

| Top 10% Mean IC50 | 18.4 nM |
|-------------------|---------|
|-------------------|---------|

|          | Predicted Active | Predicted Inactive |
|----------|------------------|--------------------|
| Active   | 74               | 18                 |
| Inactive | 50               | 128                |

< 20 nM DefGood in ALK, 30% error; Random  
seed = 121783

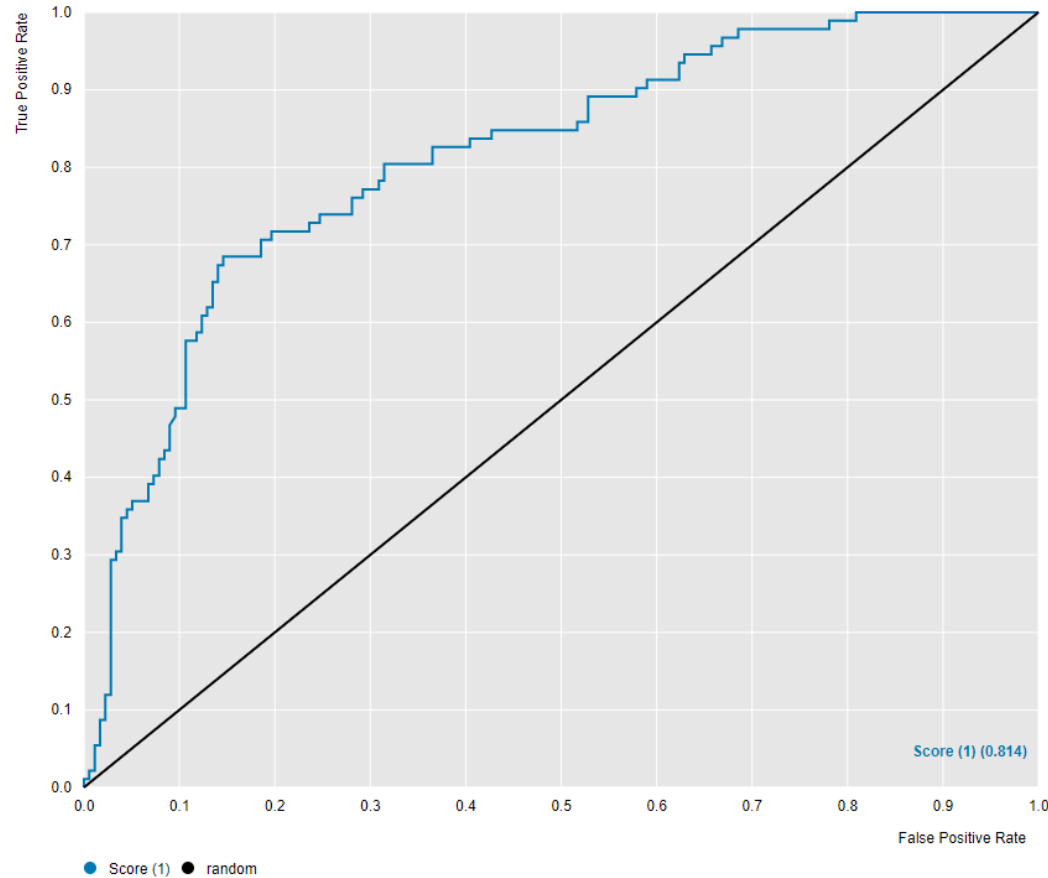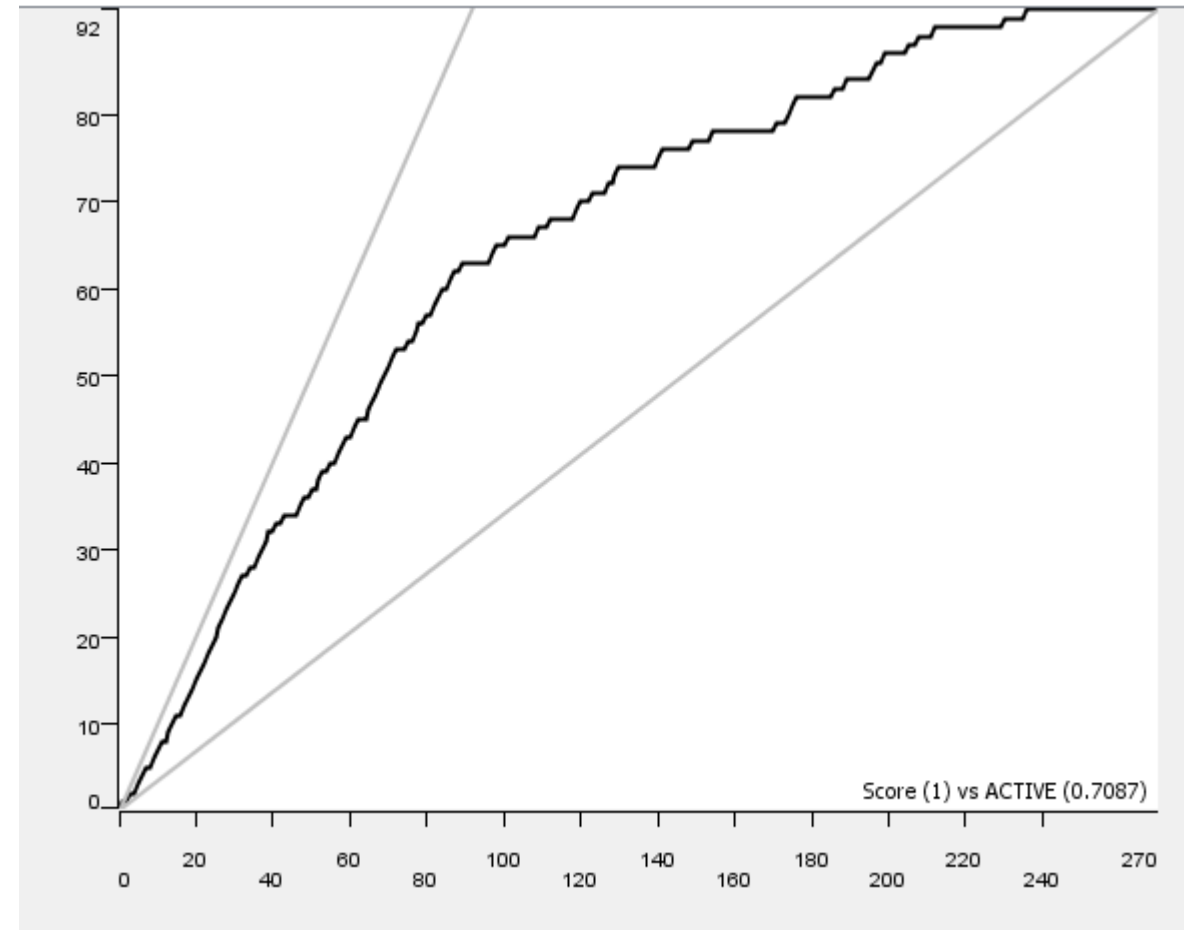

N=270

Top 10% Mean  
IC50 20.4 nM

|          | Predicted Active | Predicted Inactive |
|----------|------------------|--------------------|
| Active   | 63               | 29                 |
| Inactive | 31               | 147                |

<20 nM DefGood in ALK, 40% error; Random seed = 121783

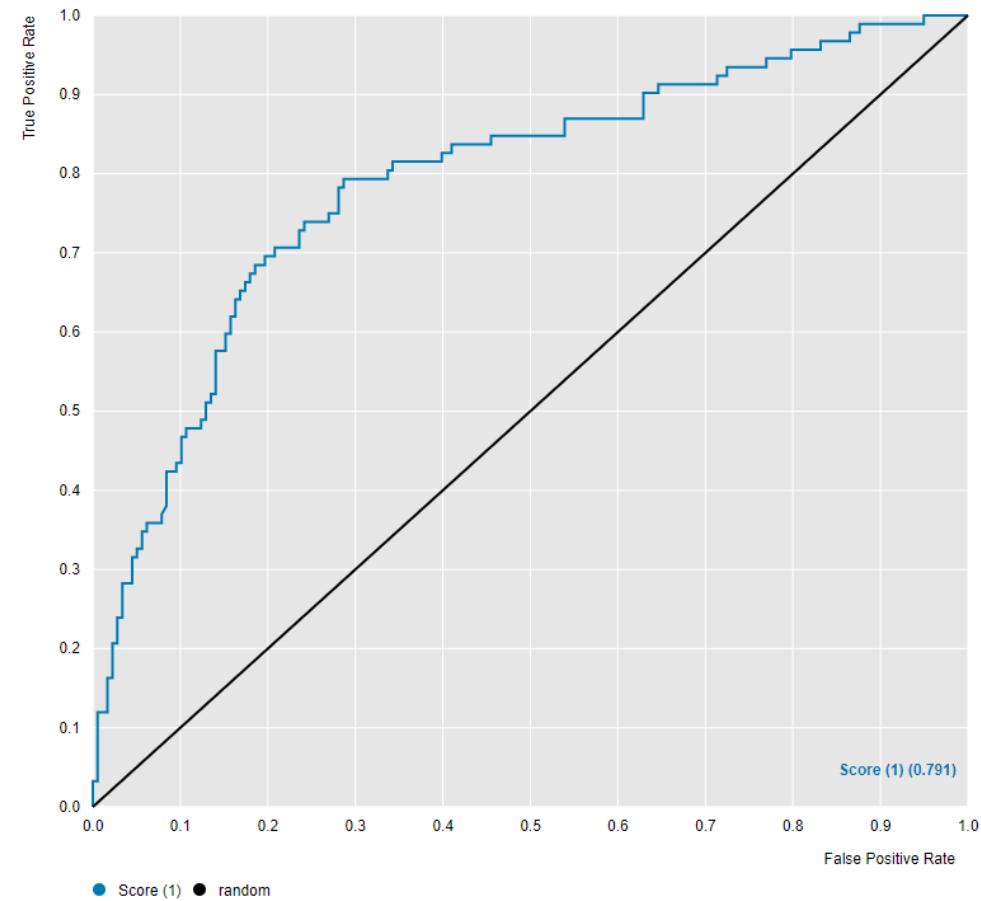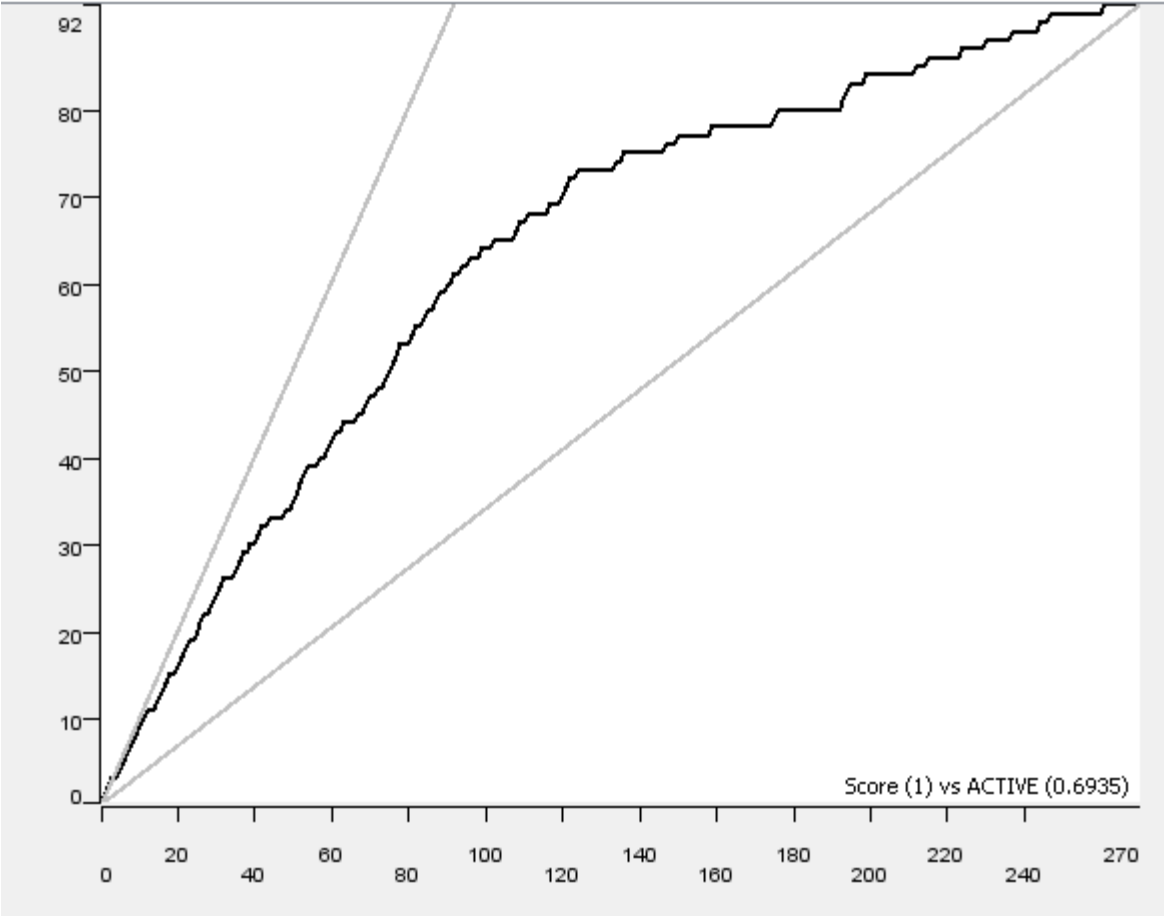

N=270

|                   |         |
|-------------------|---------|
| Top 10% Mean IC50 | 20.0 nM |
|-------------------|---------|

|          | Predicted Active | Predicted Inactive |
|----------|------------------|--------------------|
| Active   | 57               | 35                 |
| Inactive | 28               | 150                |

<20 nM DefGood in ALK, 45% error; Random seed = 121783

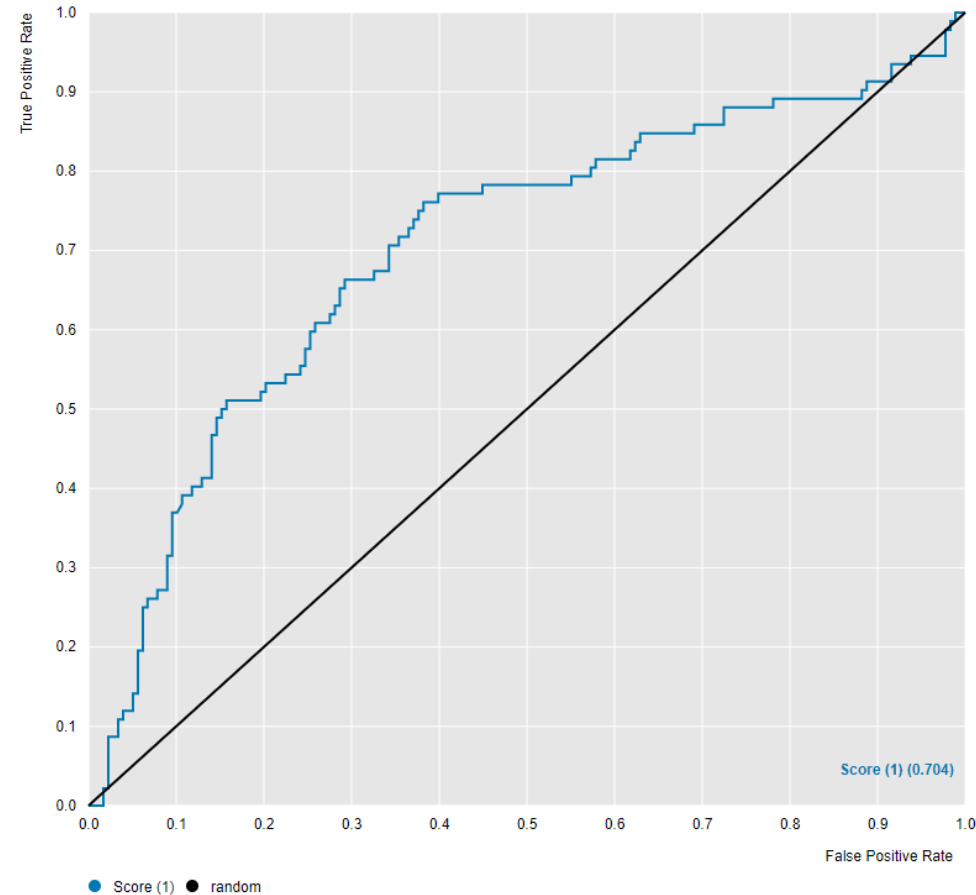

N=333

| Top 10% Mean IC50 | 130 nM |
|-------------------|--------|
|-------------------|--------|

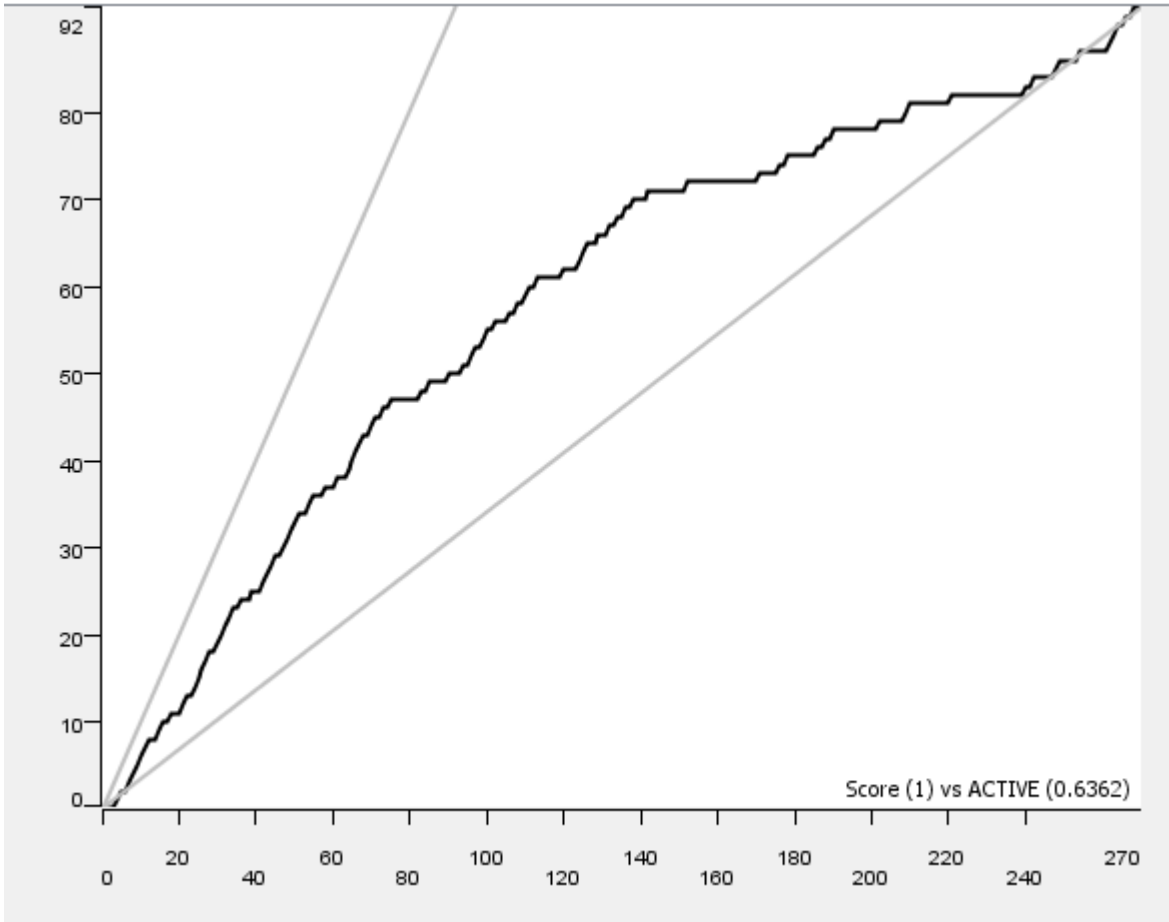

|          | Predicted Active | Predicted Inactive |
|----------|------------------|--------------------|
| Active   | 47               | 45                 |
| Inactive | 28               | 150                |

<20 nM DefGood in ALK, 50% error; Random seed = 121783

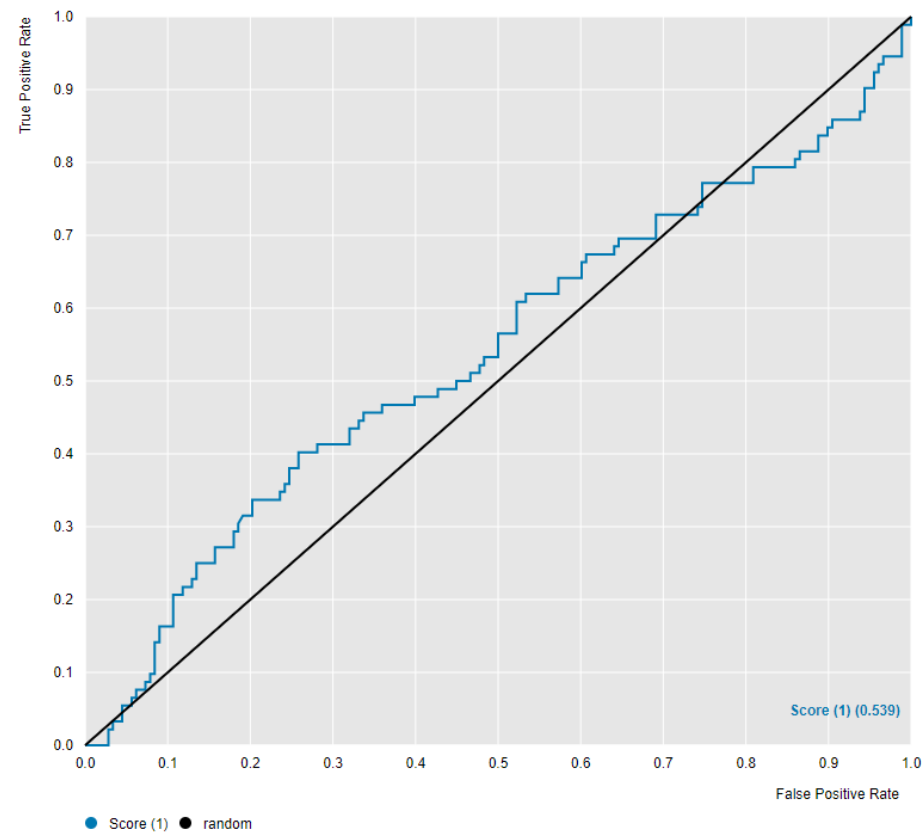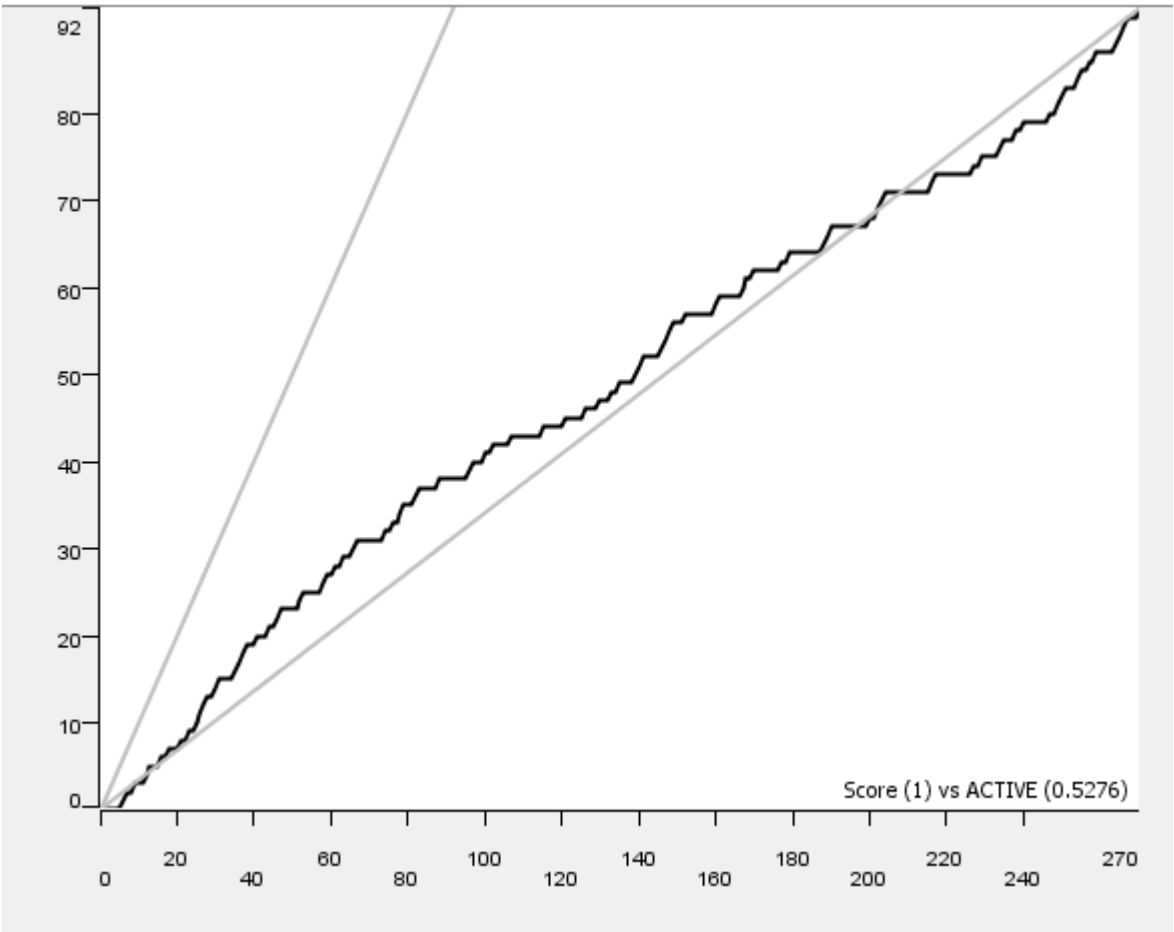

N=270

|                   |          |
|-------------------|----------|
| Top 10% Mean IC50 | 2,400 nM |
|-------------------|----------|

|          | Predicted Active | Predicted Inactive |
|----------|------------------|--------------------|
| Active   | 67               | 25                 |
| Inactive | 123              | 55                 |

# Conclusion - NBN

- An NBN could be generated for ALK with a decision value of  $<20$  nM as defined as active. The predictivity of the algorithm could be preserved in three random train/test cycles. The point of failure was 45%, 45% and 50% error.

# RF Error Tolerance- <20 nM DefGood in ALK

- 0-50% absolute error

RF- < 20 nM DefGood in ALK, 5% error;  
Random seed = 1515533876005

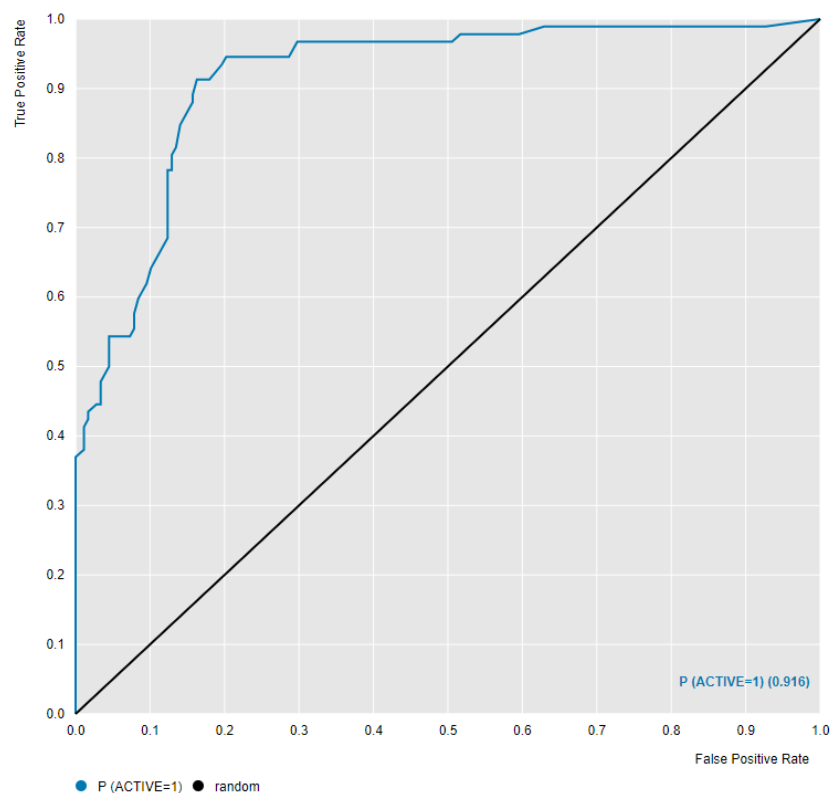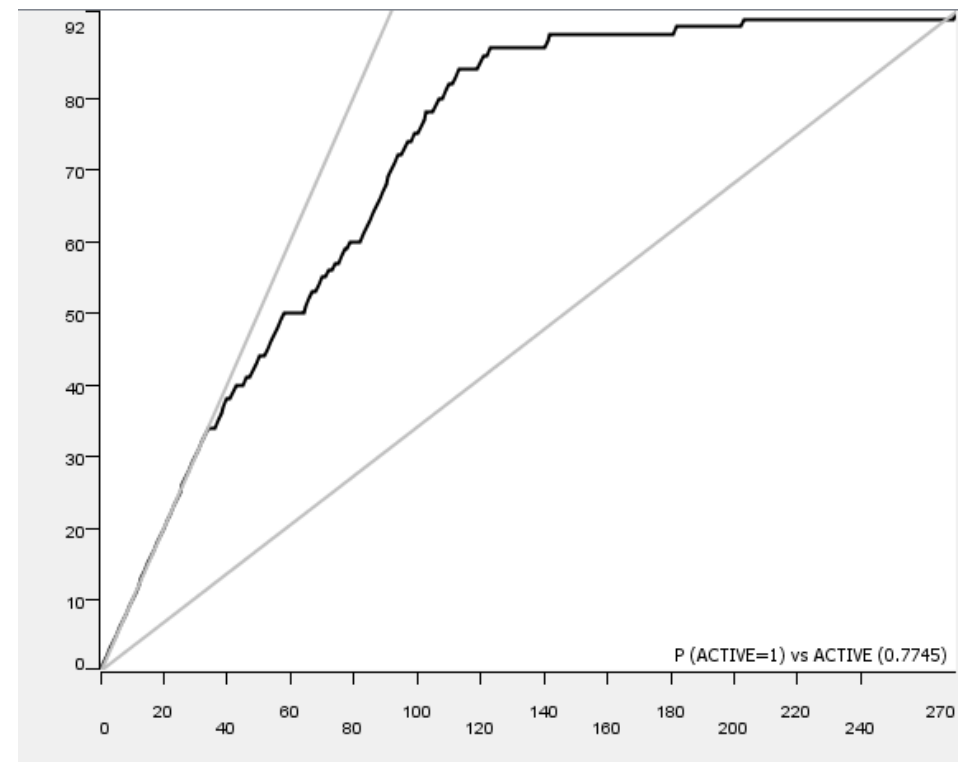

N=270

| Top 10% Mean<br>IC50 | 2.8 nM |
|----------------------|--------|
|----------------------|--------|

|          | Predicted Active | Predicted Inactive |
|----------|------------------|--------------------|
| Active   | 66               | 26                 |
| Inactive | 22               | 156                |



# RF-< 20 nM DefGood in ALK, 10% error

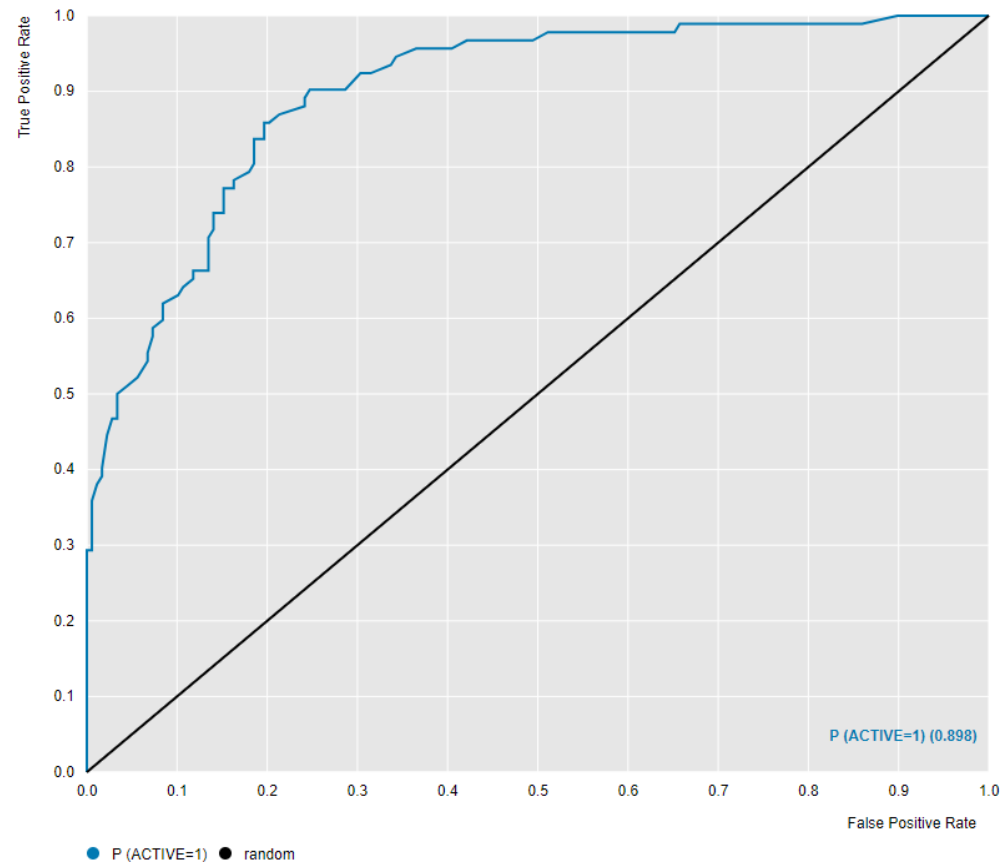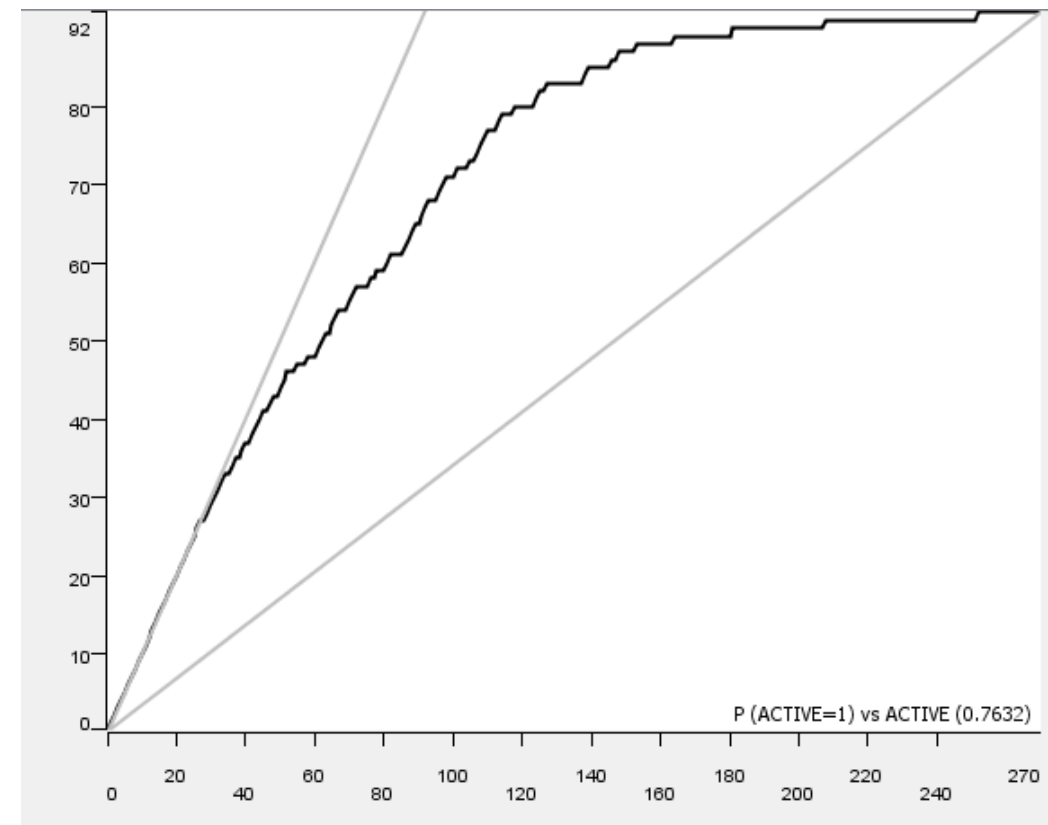

N=270

|                      |        |
|----------------------|--------|
| Top 10% Mean<br>IC50 | 3.5 nM |
|----------------------|--------|

|          | Predicted Active | Predicted Inactive |
|----------|------------------|--------------------|
| Active   | 68               | 24                 |
| Inactive | 26               | 152                |

# RF-< 20 nM DefGood in ALK, 20% error

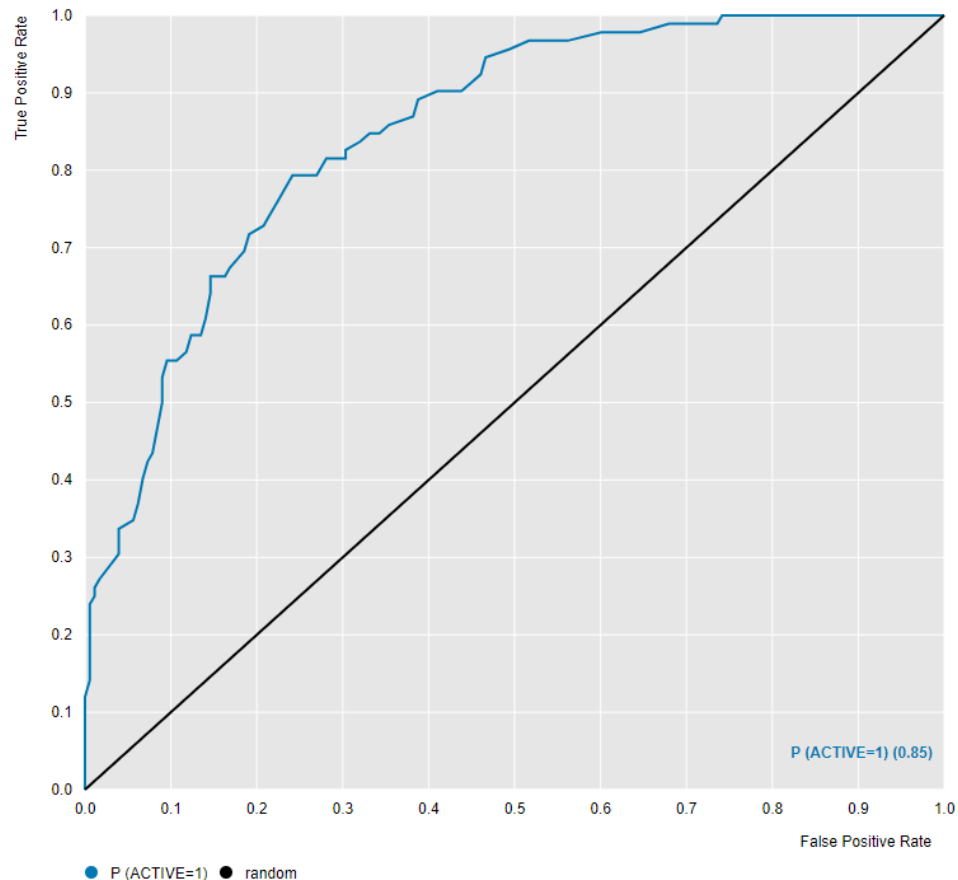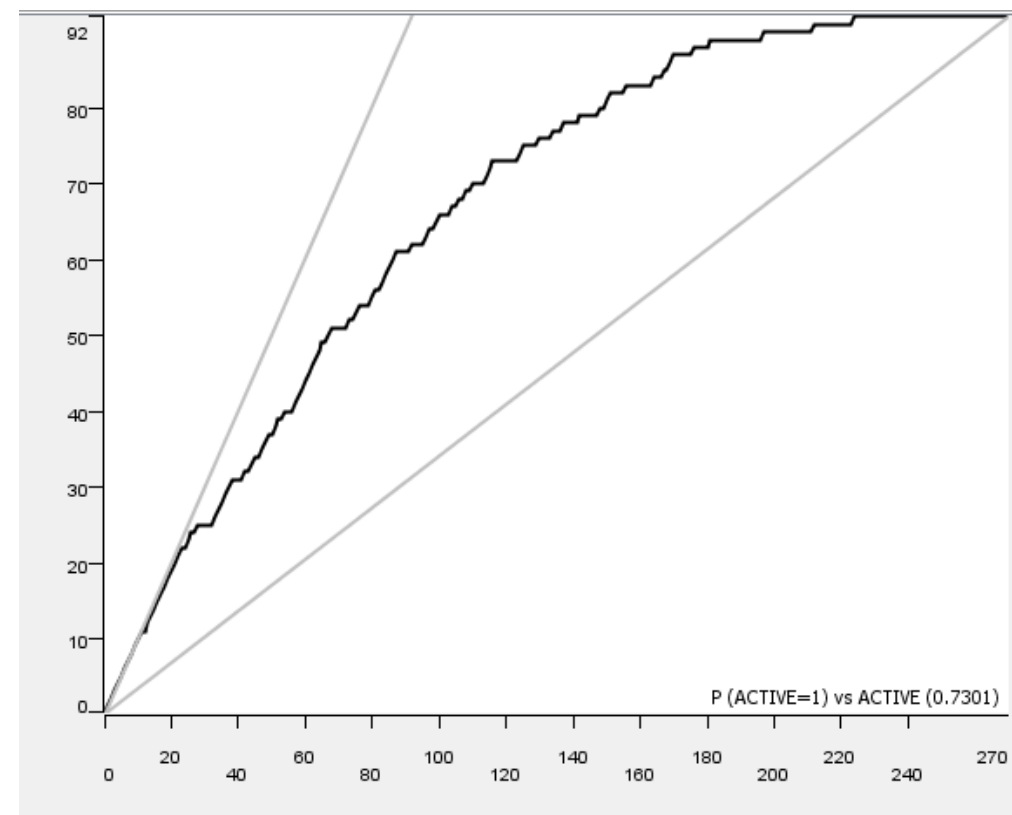

N=270

Top 10% Mean  
IC50

6.8 nM

|          | Predicted Active | Predicted Inactive |
|----------|------------------|--------------------|
| Active   | 62               | 30                 |
| Inactive | 30               | 148                |

# RF-< 20 nM DefGood in ALK, 25% error

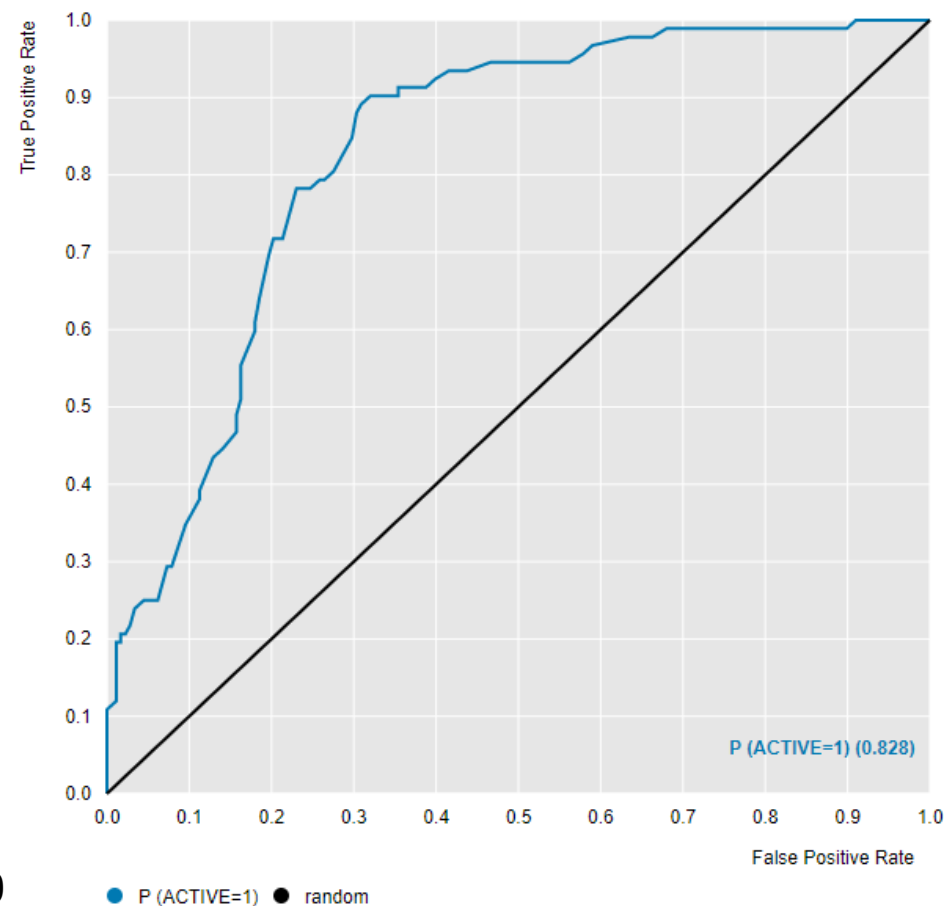

N=270

| Top 10% Mean IC50 | 362 nM |
|-------------------|--------|
|-------------------|--------|

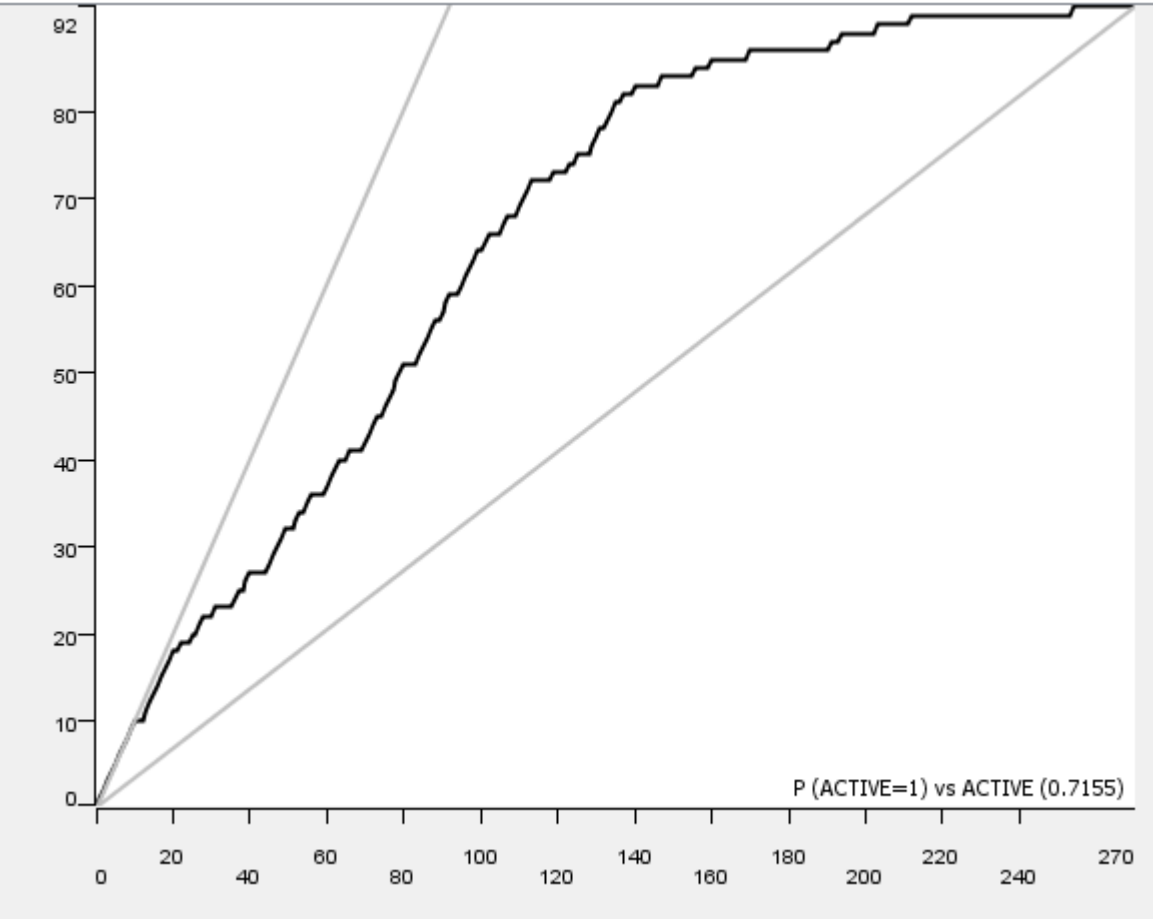

|          | Predicted Active | Predicted Inactive |
|----------|------------------|--------------------|
| Active   | 66               | 26                 |
| Inactive | 38               | 140                |

# RF-<20 nM DefGood in ALK, 30% error

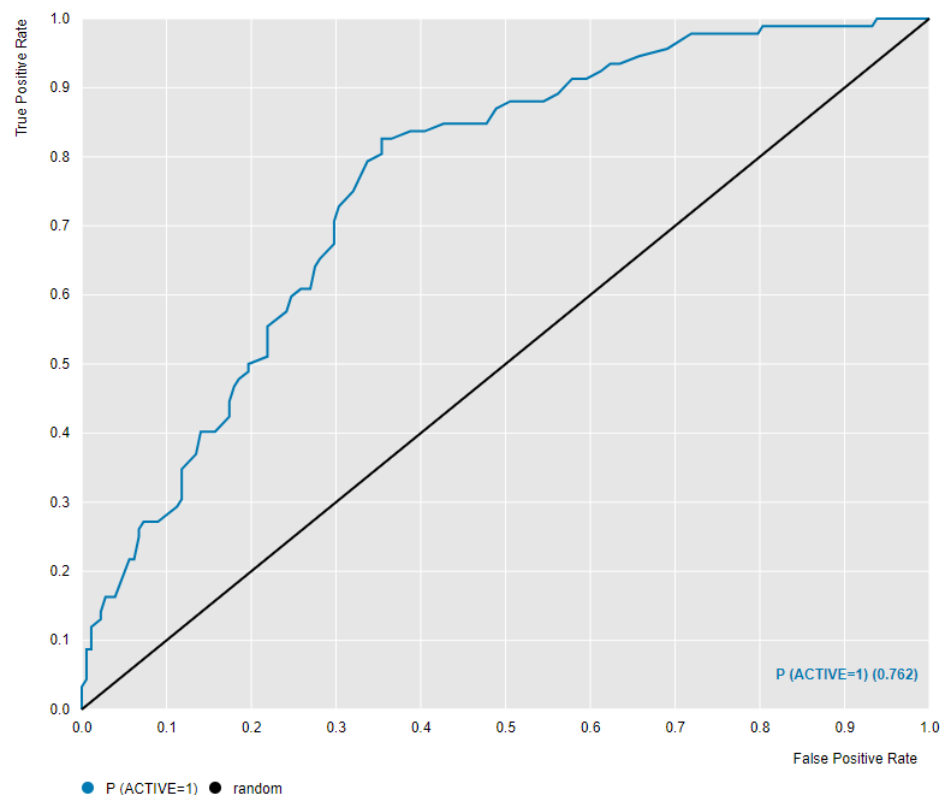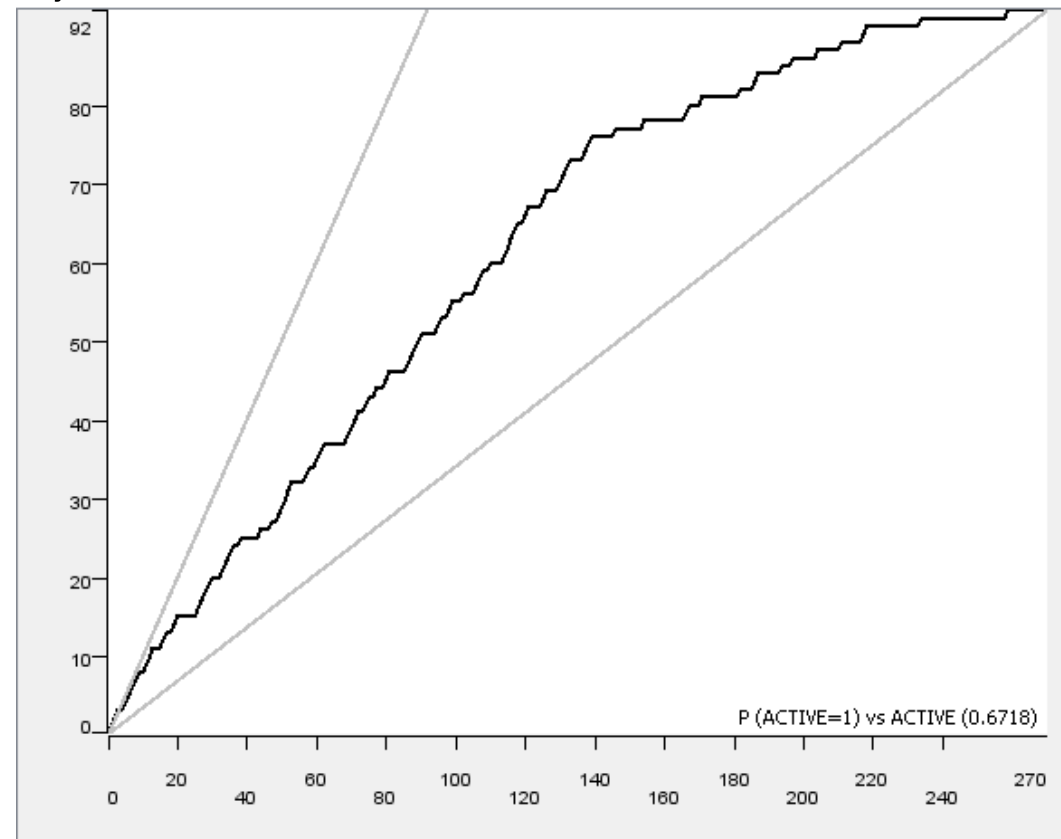

N=270

|                   |          |
|-------------------|----------|
| Top 10% Mean IC50 | 1,800 nM |
|-------------------|----------|

|          | Predicted Active | Predicted Inactive |
|----------|------------------|--------------------|
| Active   | 56               | 36                 |
| Inactive | 46               | 132                |

< 20 nM DefGood in ALK, 10% error; Random seed = 429

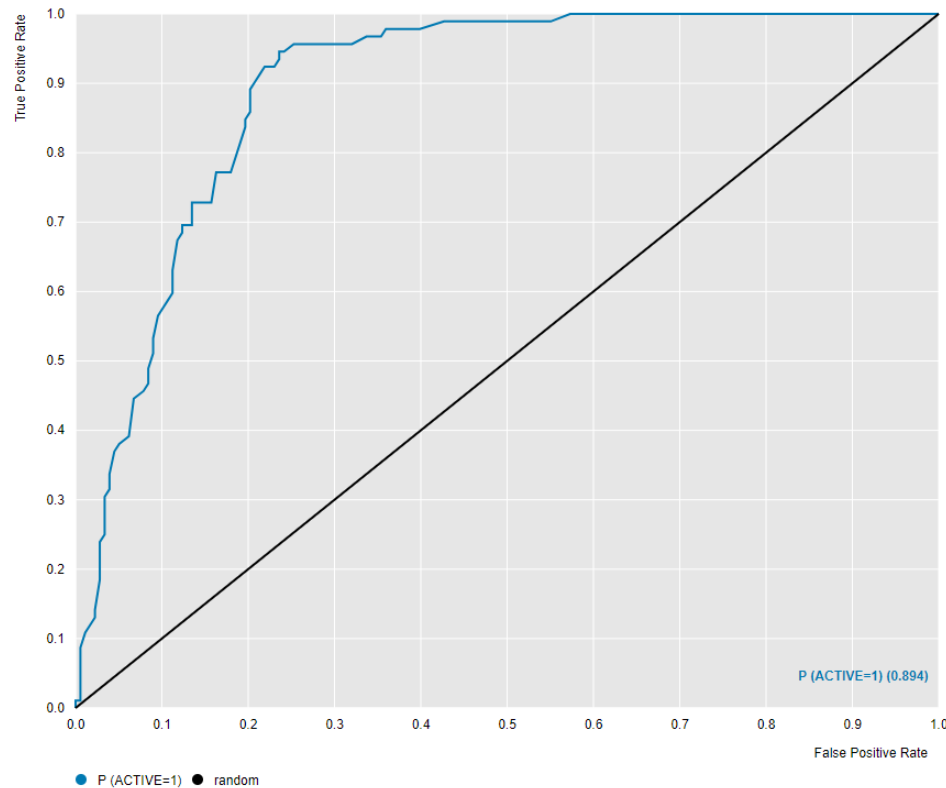

N=270

| Top 10% Mean IC50 | 16.2 nM |
|-------------------|---------|
|-------------------|---------|

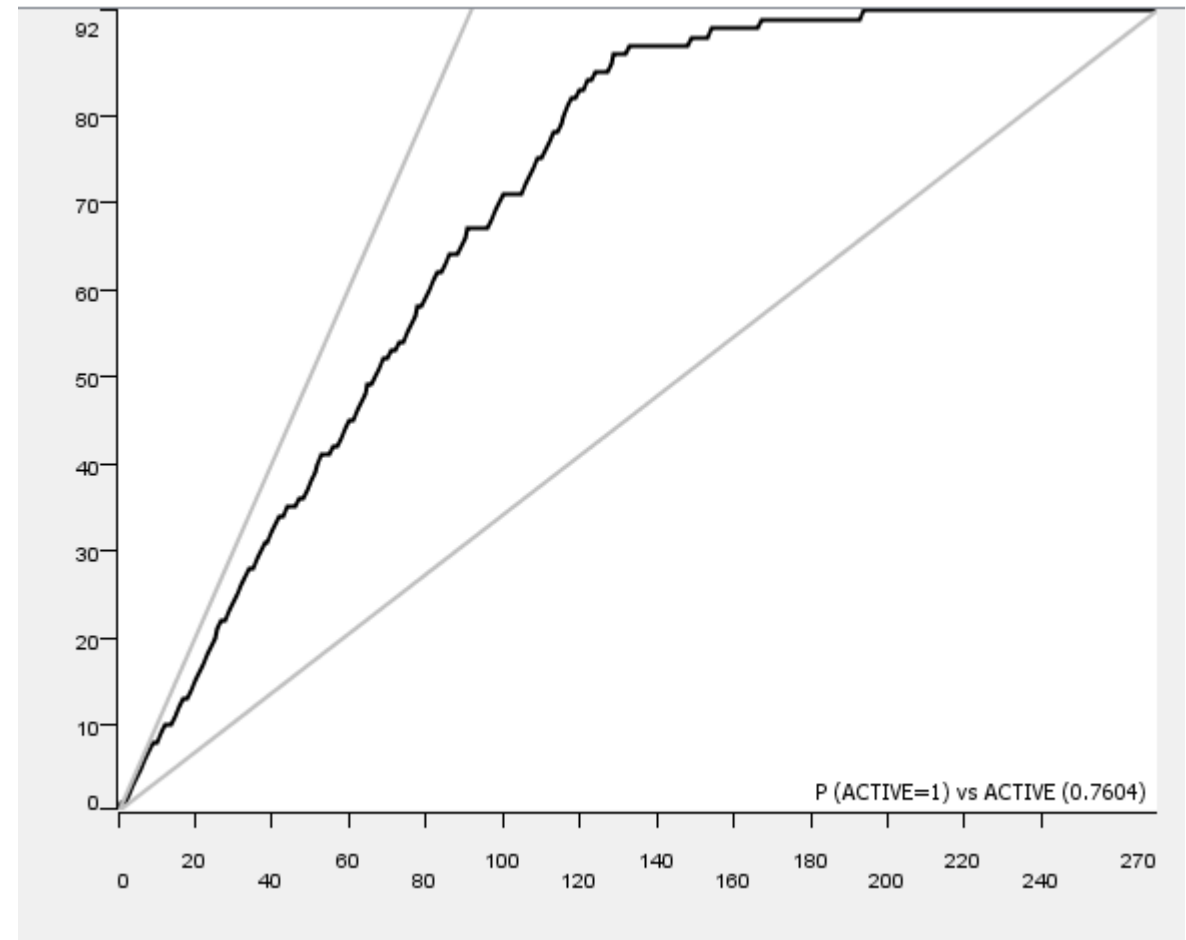

|          | Predicted Active | Predicted Inactive |
|----------|------------------|--------------------|
| Active   | 67               | 25                 |
| Inactive | 28               | 150                |

< 20 nM DefGood in ALK, 20% error; Random seed = 429

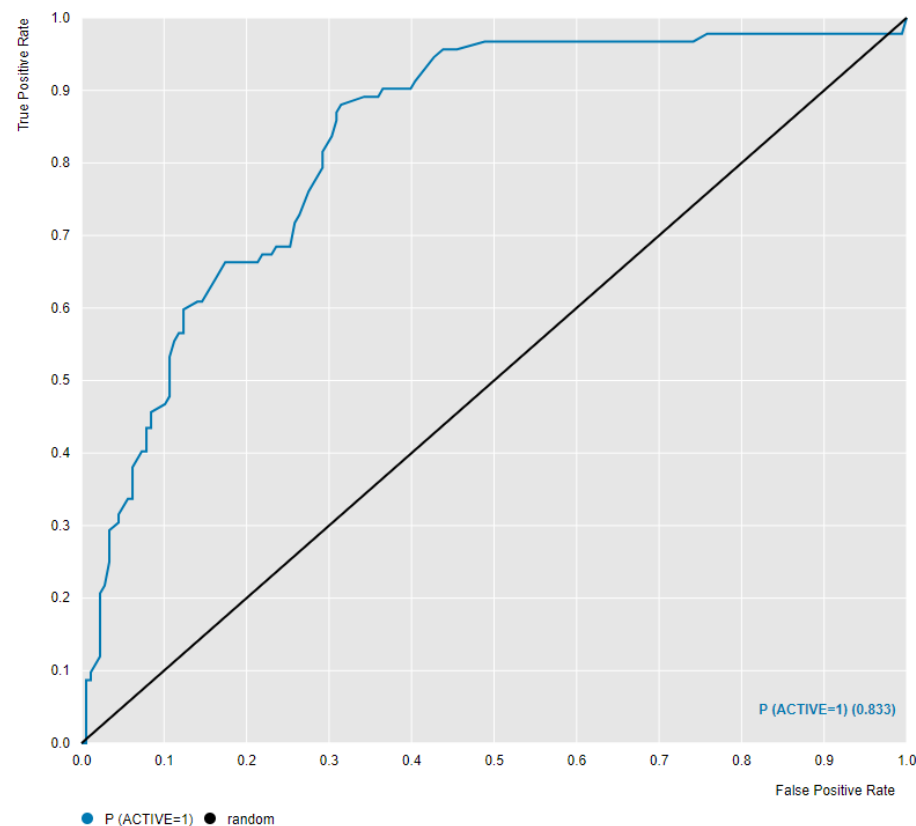

N=270

| Top 10% Mean IC50 | 139 nM |
|-------------------|--------|
|-------------------|--------|

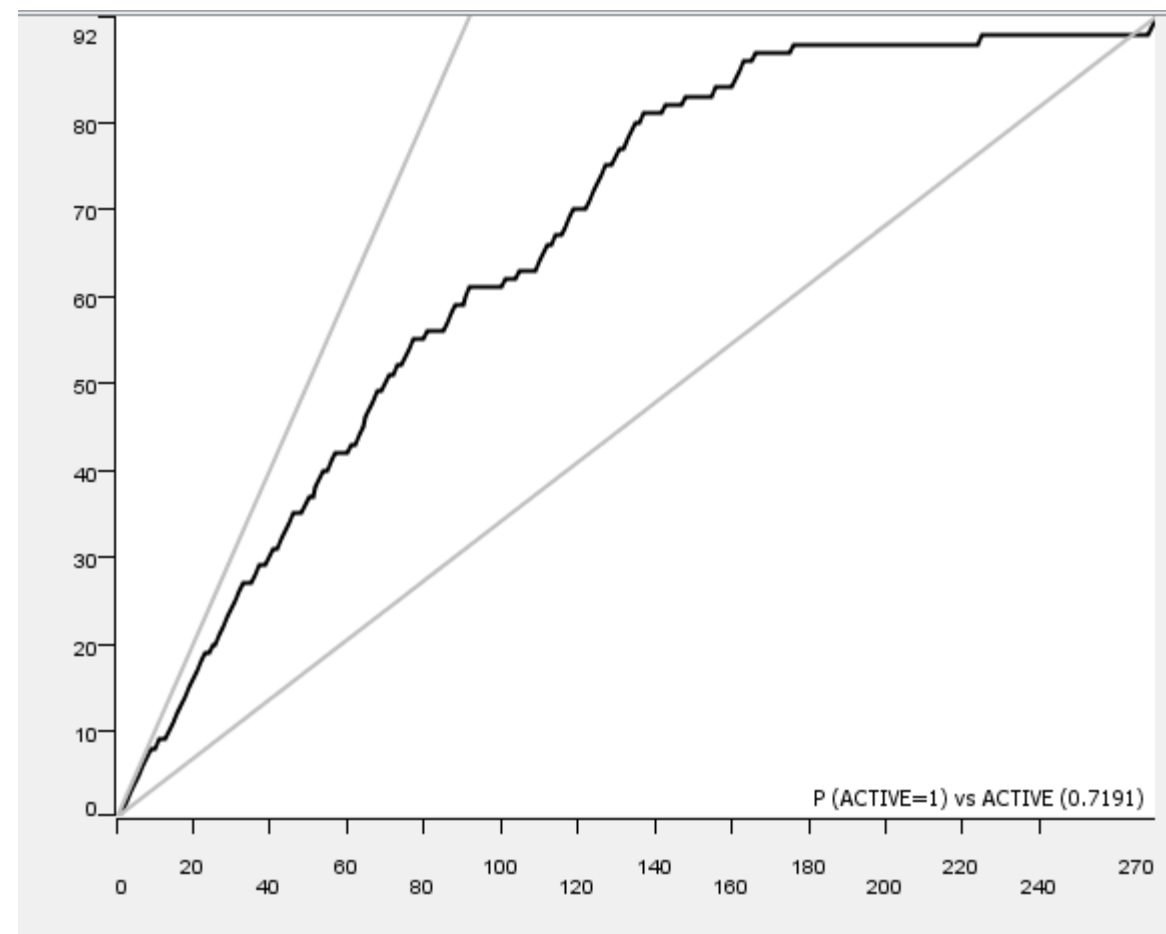

|          | Predicted Active | Predicted Inactive |
|----------|------------------|--------------------|
| Active   | 62               | 30                 |
| Inactive | 39               | 139                |

< 20 nM DefGood in ALK, 25% error; Random seed = 429

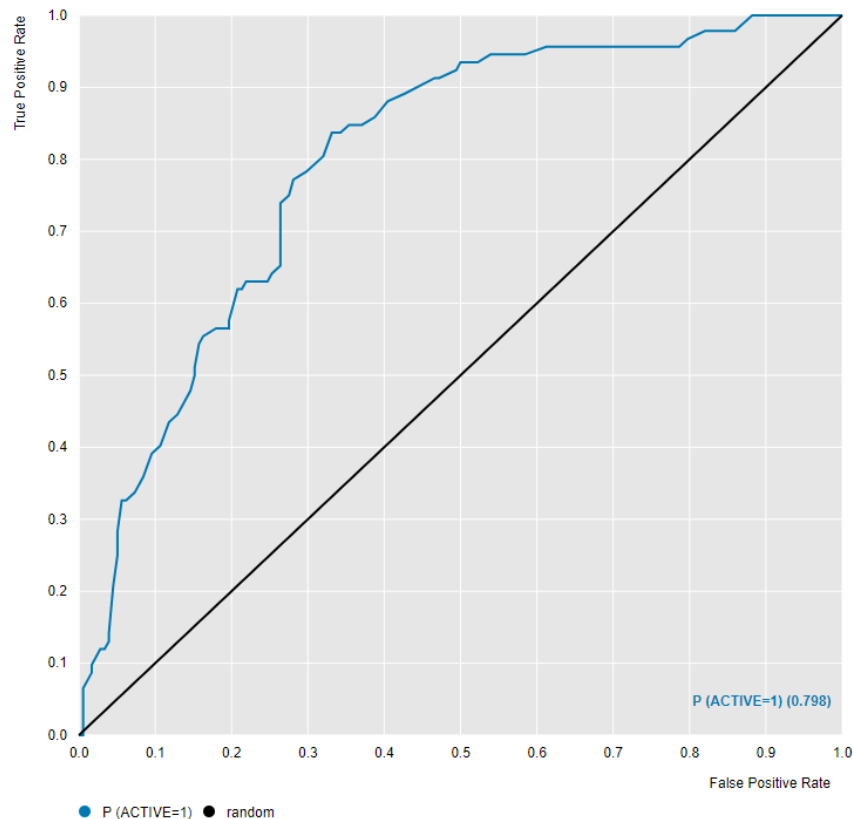

N=270

Top 10% Mean  
IC50

233 nM

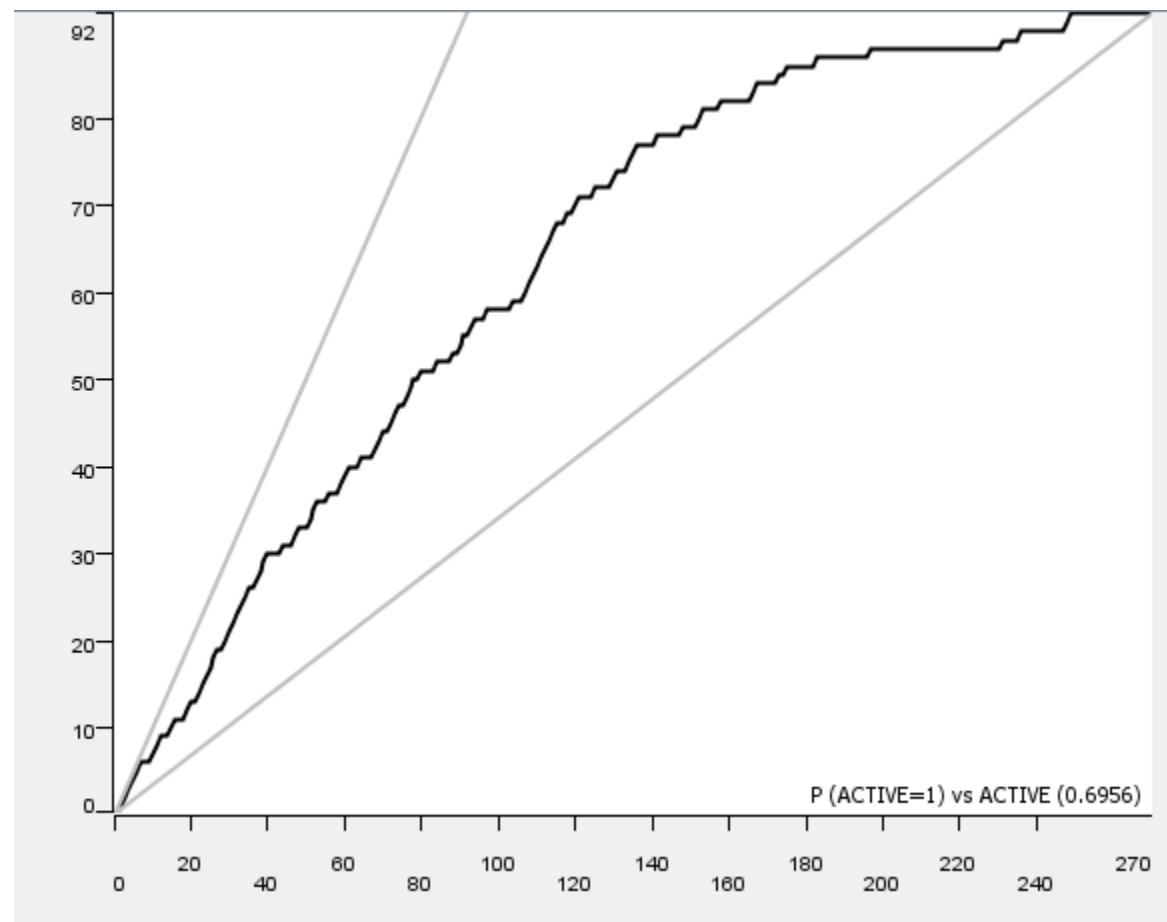

|          | Predicted Active | Predicted Inactive |
|----------|------------------|--------------------|
| Active   | 58               | 34                 |
| Inactive | 43               | 135                |

< 20 nM DefGood in ALK, 35% error; Random seed = 429

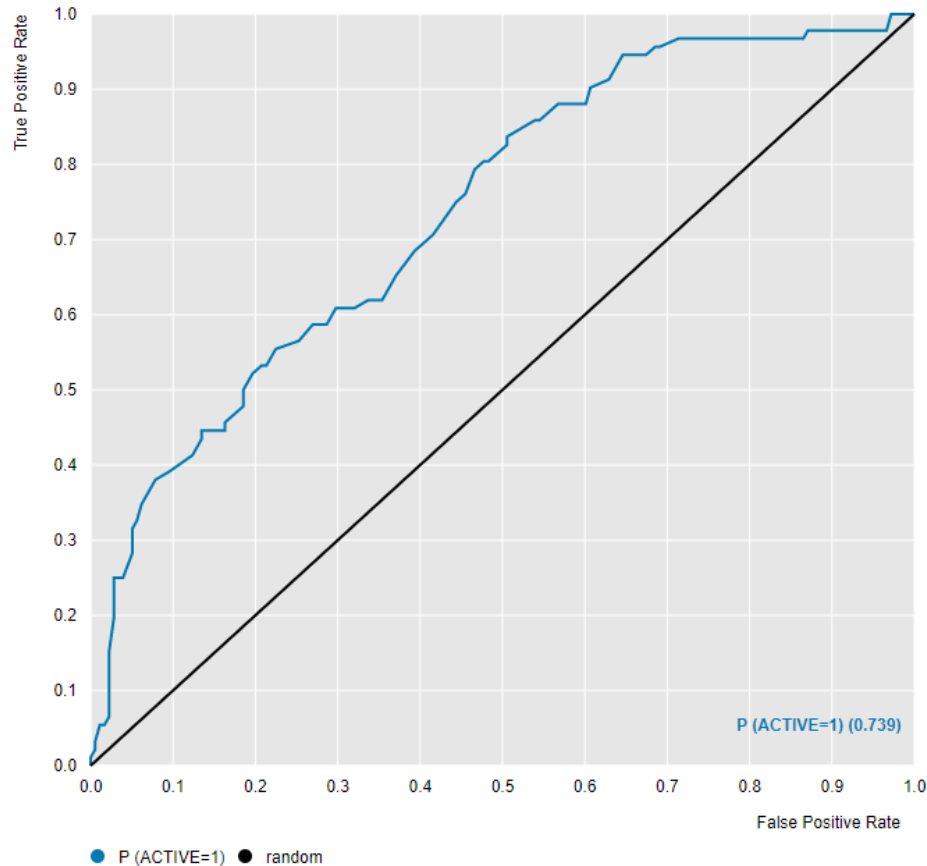

N=270

Top 10% Mean  
IC50

111 nM

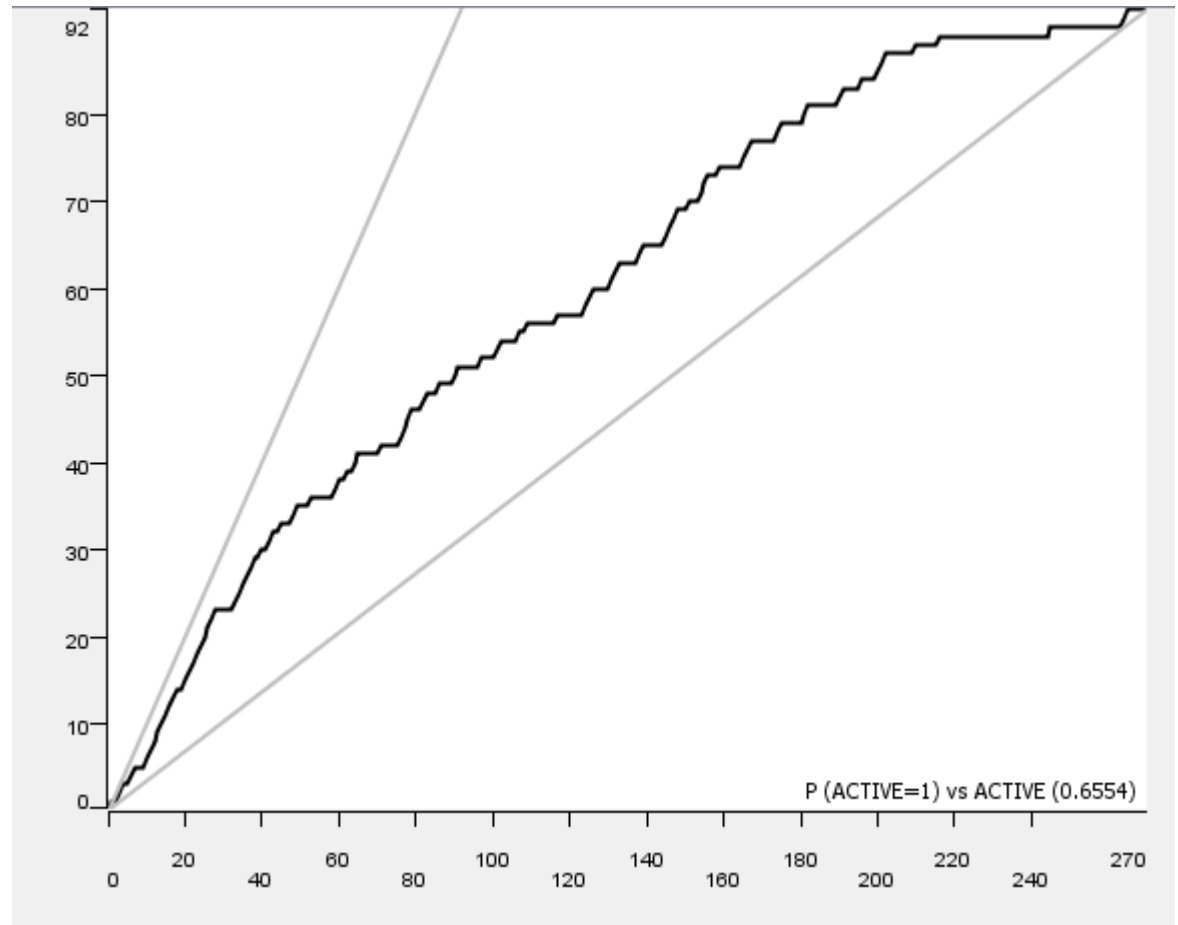

|          | Predicted Active | Predicted Inactive |
|----------|------------------|--------------------|
| Active   | 55               | 37                 |
| Inactive | 52               | 126                |



< 20 nM DefGood in ALK, 40% error; Random seed = 429

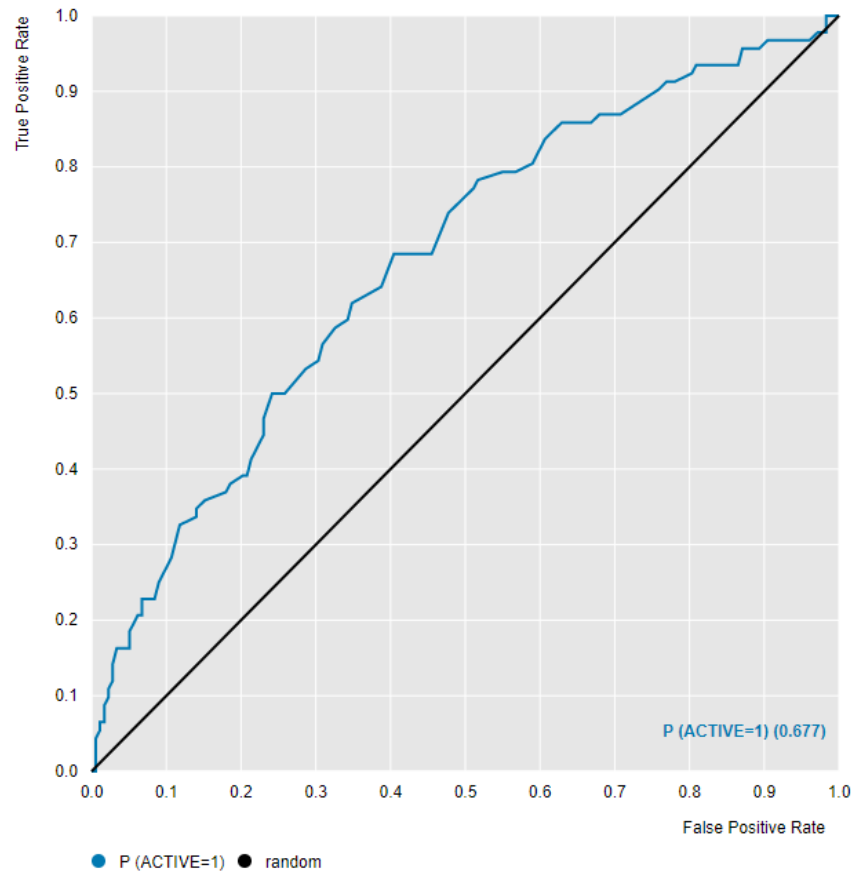

N=270

Top 10% Mean  
IC50

383 nM

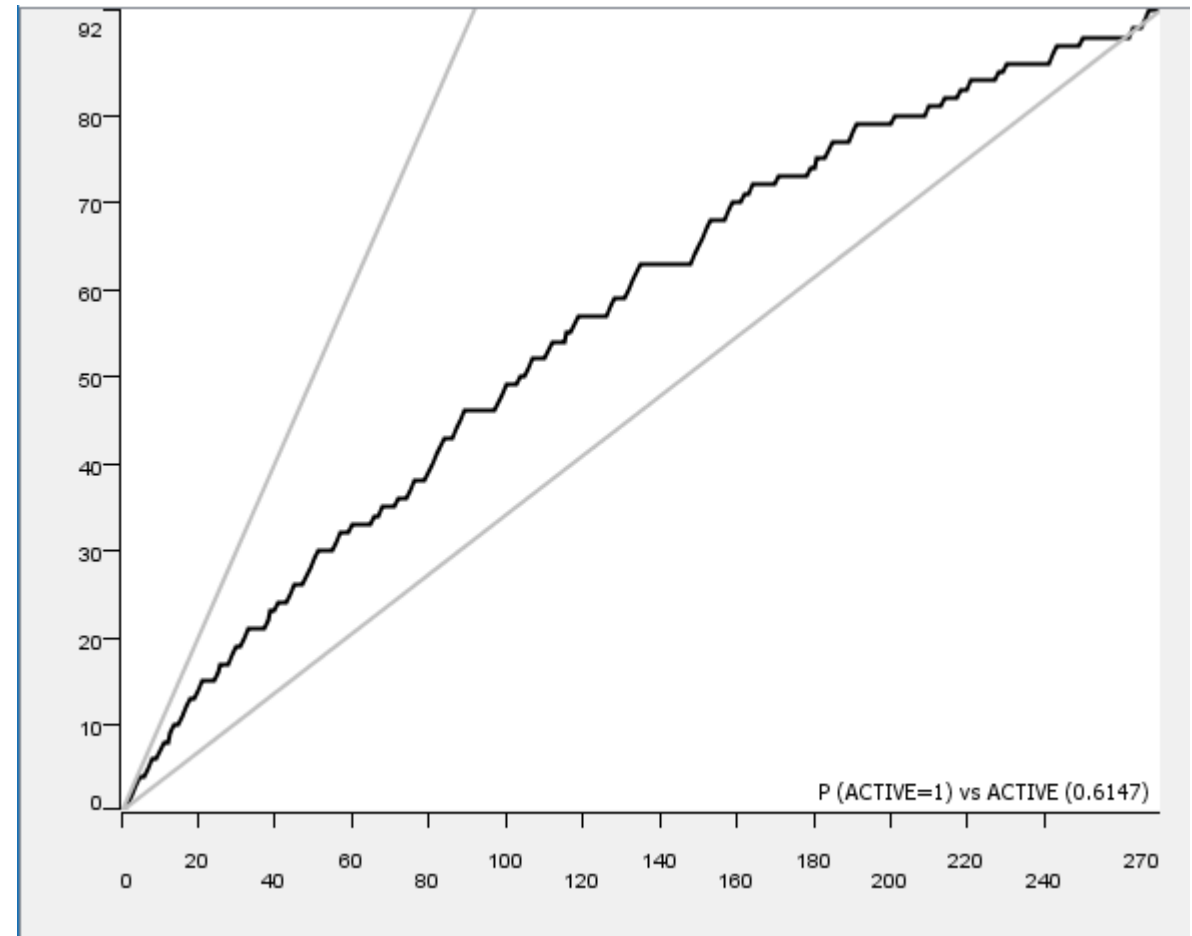

|          | Predicted Active | Predicted Inactive |
|----------|------------------|--------------------|
| Active   | 50               | 42                 |
| Inactive | 54               | 124                |

< 20 nM DefGood in ALK, 10% error; Random seed = 121783

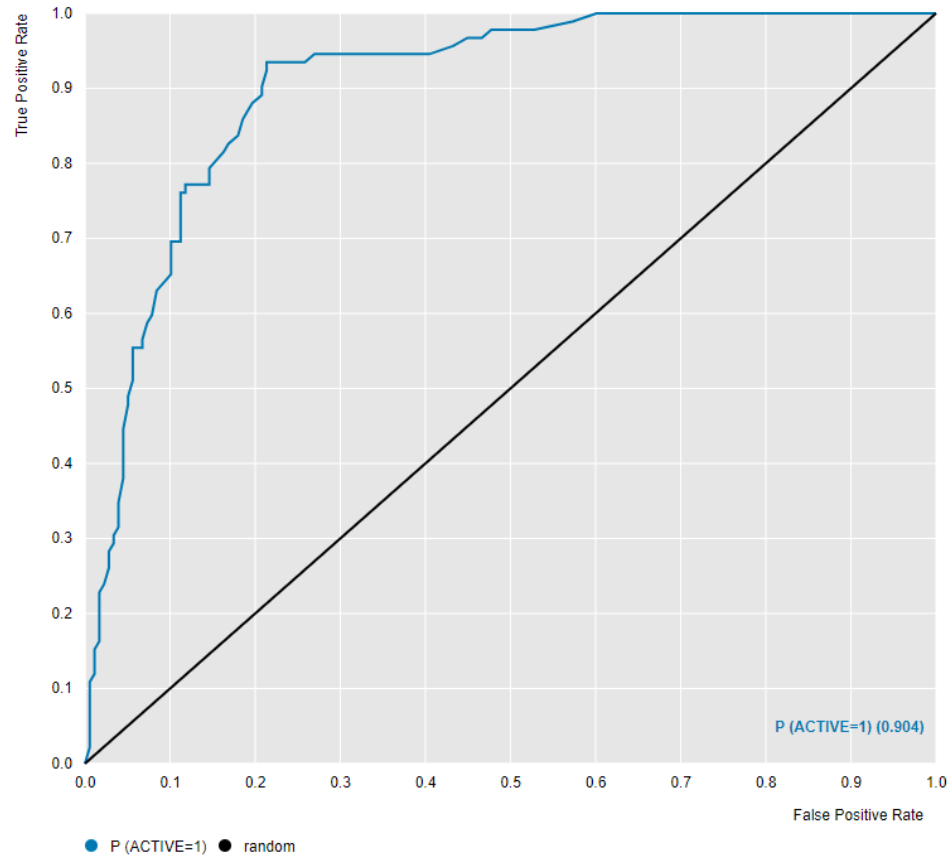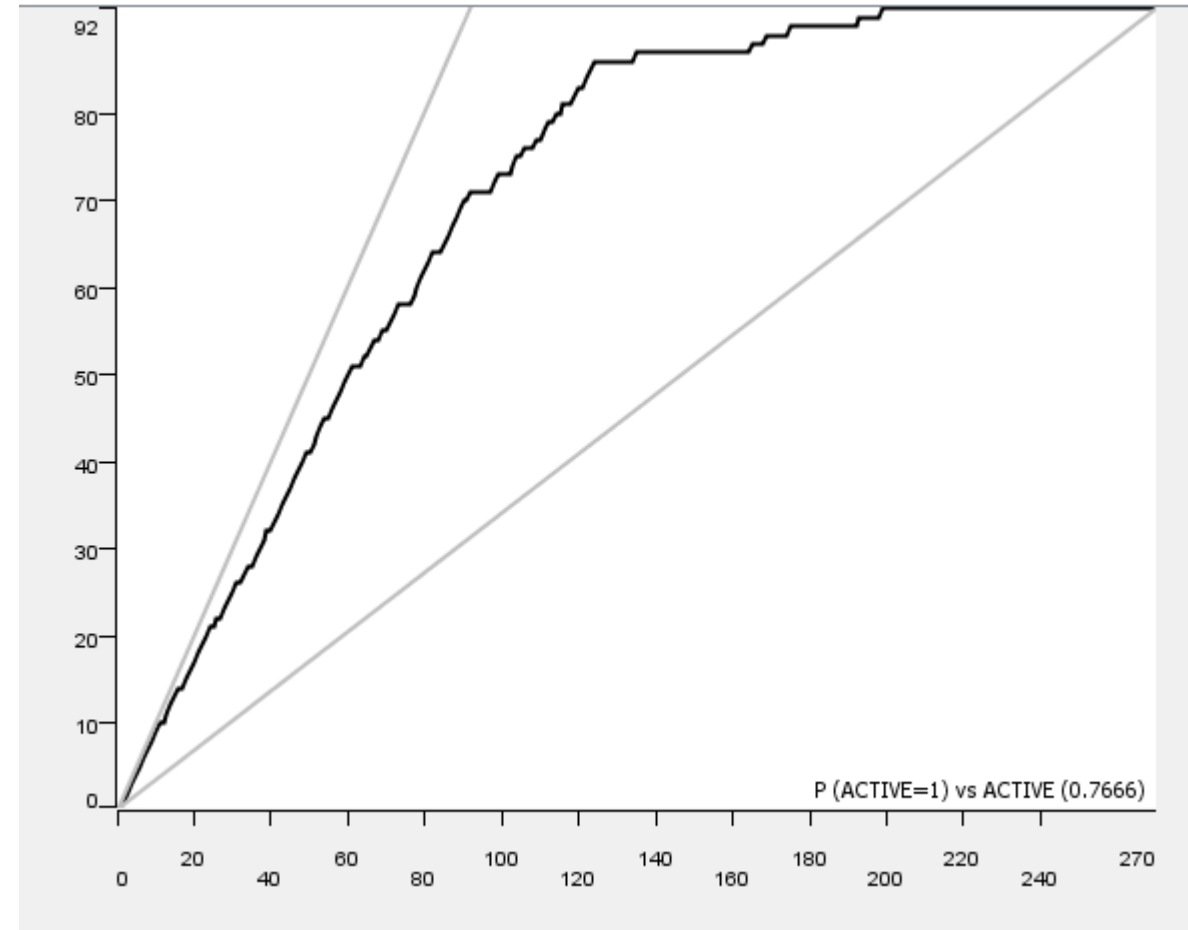

N=270

| Top 10% Mean IC50 | 13.4 nM |
|-------------------|---------|
|-------------------|---------|

|          | Predicted Active | Predicted Inactive |
|----------|------------------|--------------------|
| Active   | 71               | 21                 |
| Inactive | 21               | 157                |

< 20 nM DefGood in ALK, 20% error; Random seed = 121783

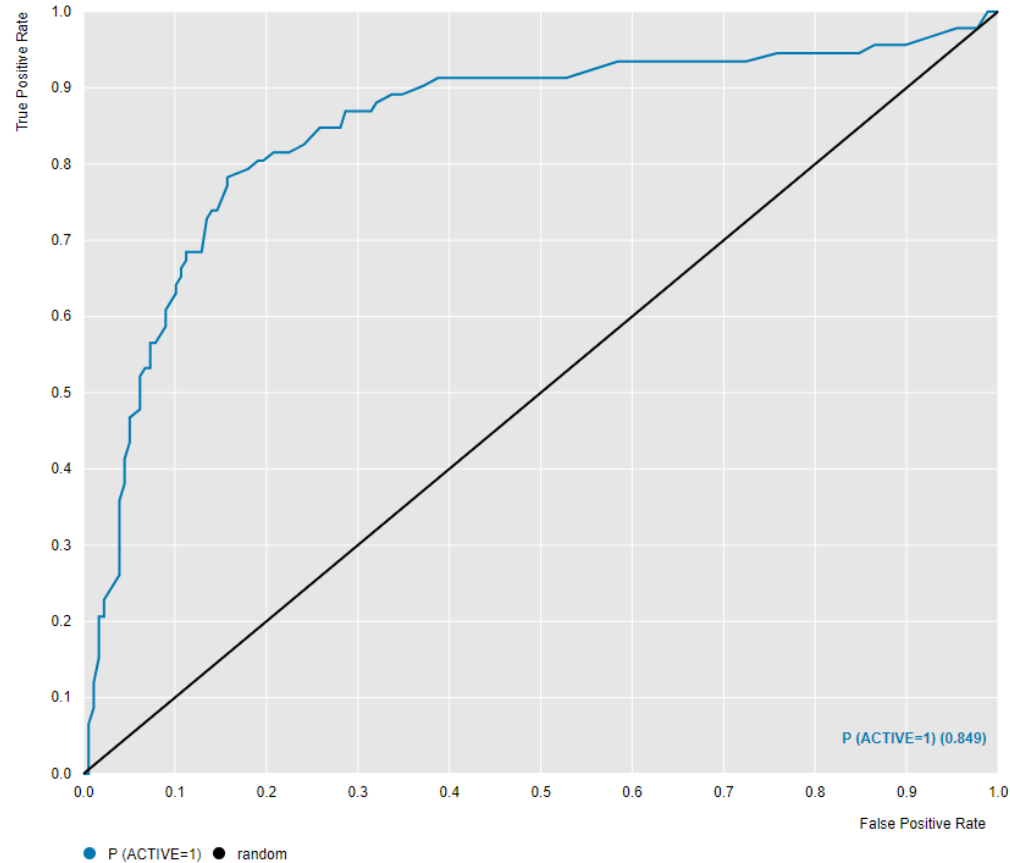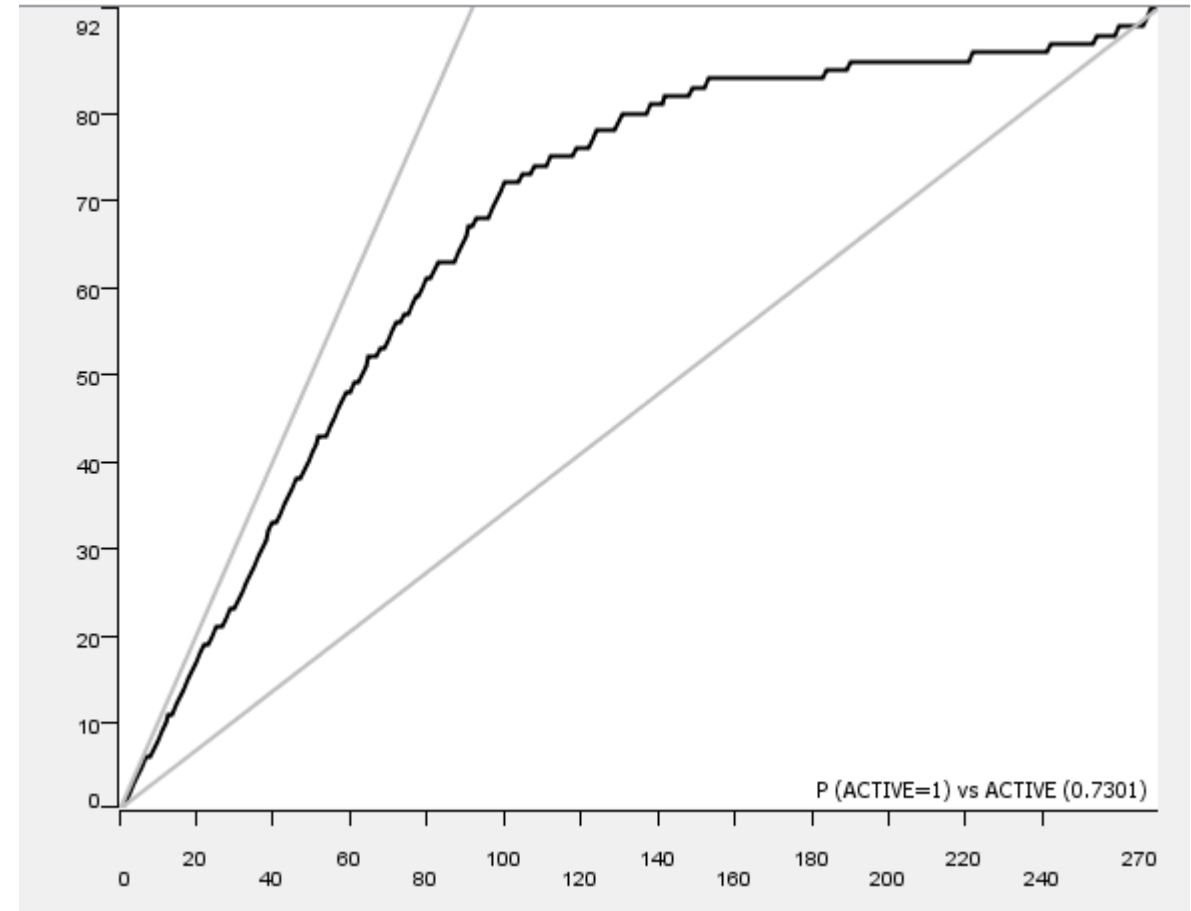

N=270

|                   |                                    |
|-------------------|------------------------------------|
| Top 10% Mean IC50 | 15.9 nM<br>(2 micromolar mistakes) |
|-------------------|------------------------------------|

|          | Predicted Active | Predicted Inactive |
|----------|------------------|--------------------|
| Active   | 63               | 29                 |
| Inactive | 22               | 156                |

< 20 nM DefGood in ALK, 30% error; Random seed = 121783

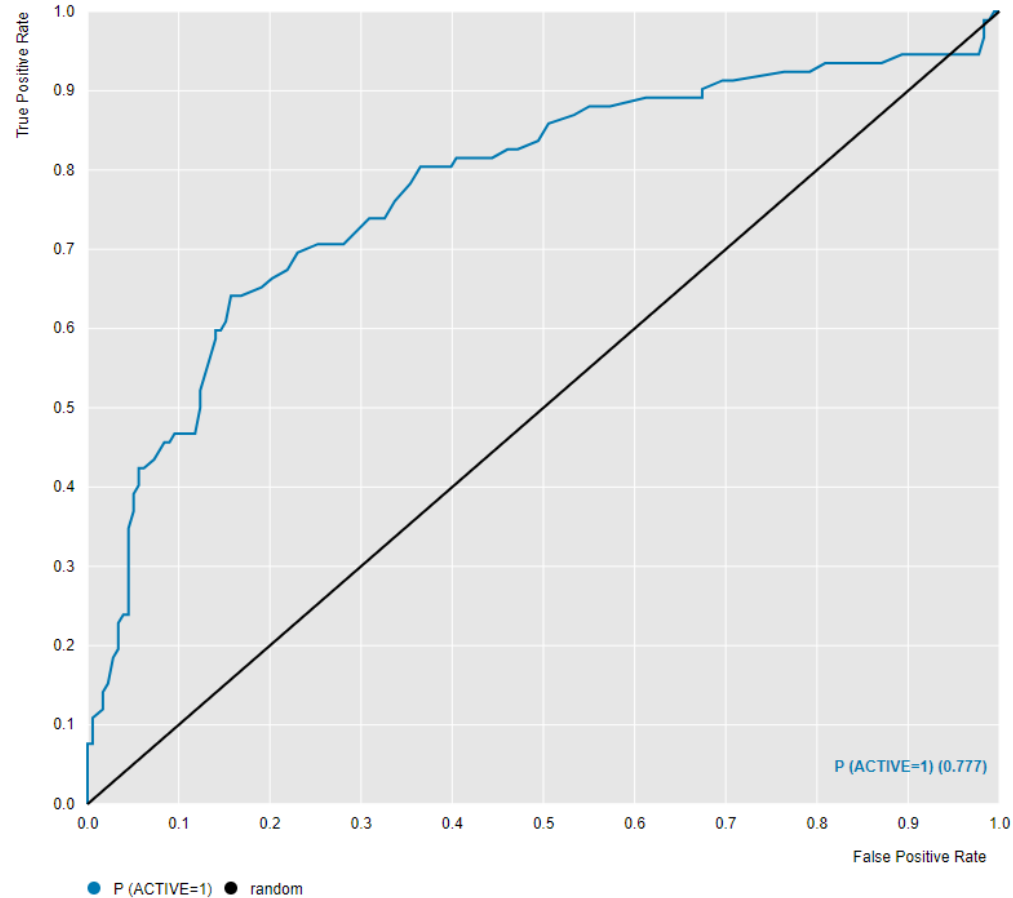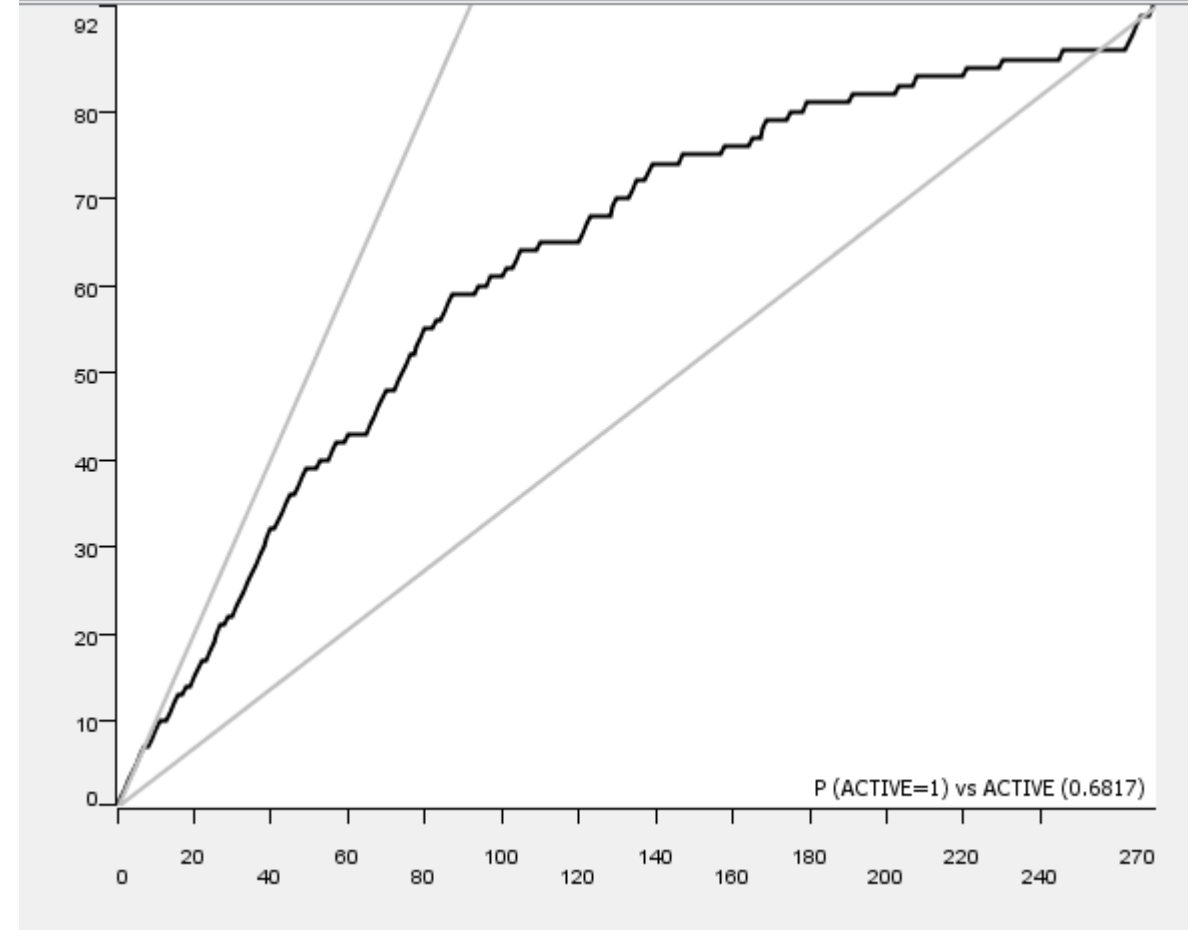

N=270

| Top 10% Mean IC50 | 19.0 nM |
|-------------------|---------|
|-------------------|---------|

|          | Predicted Active | Predicted Inactive |
|----------|------------------|--------------------|
| Active   | 56               | 36                 |
| Inactive | 27               | 151                |

< 20 nM DefGood in ALK, 35% error; Random seed = 121783

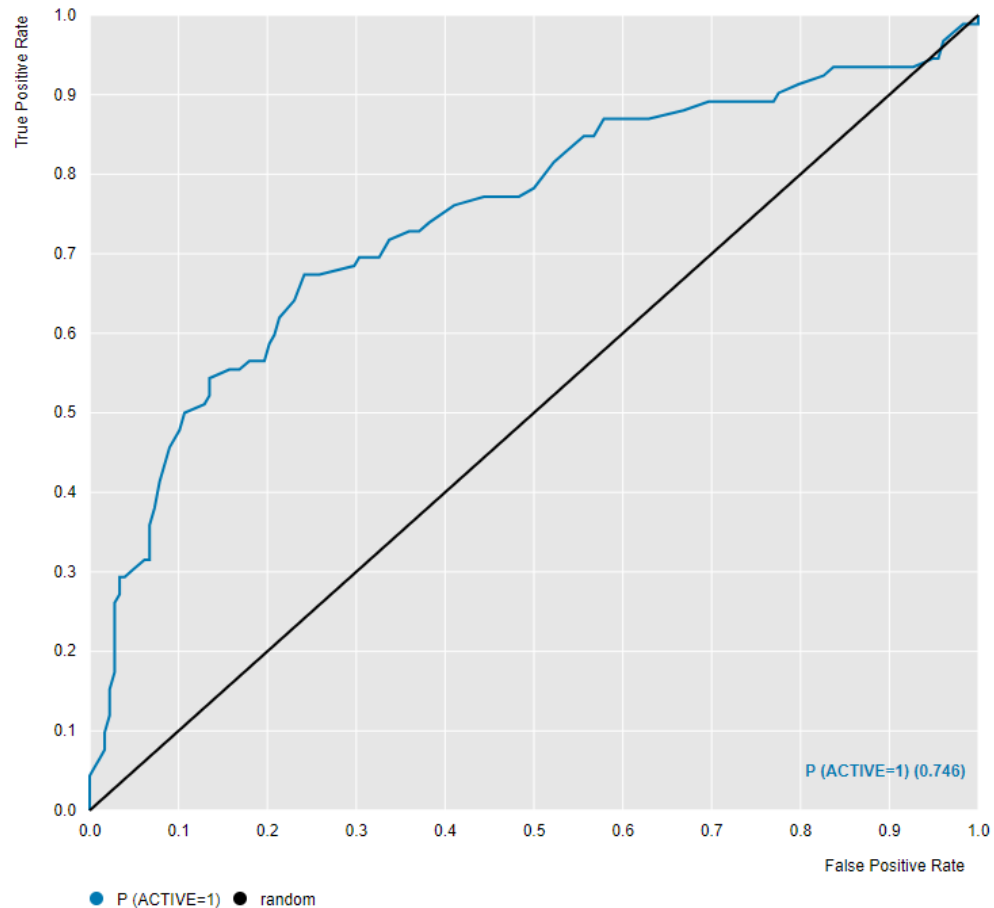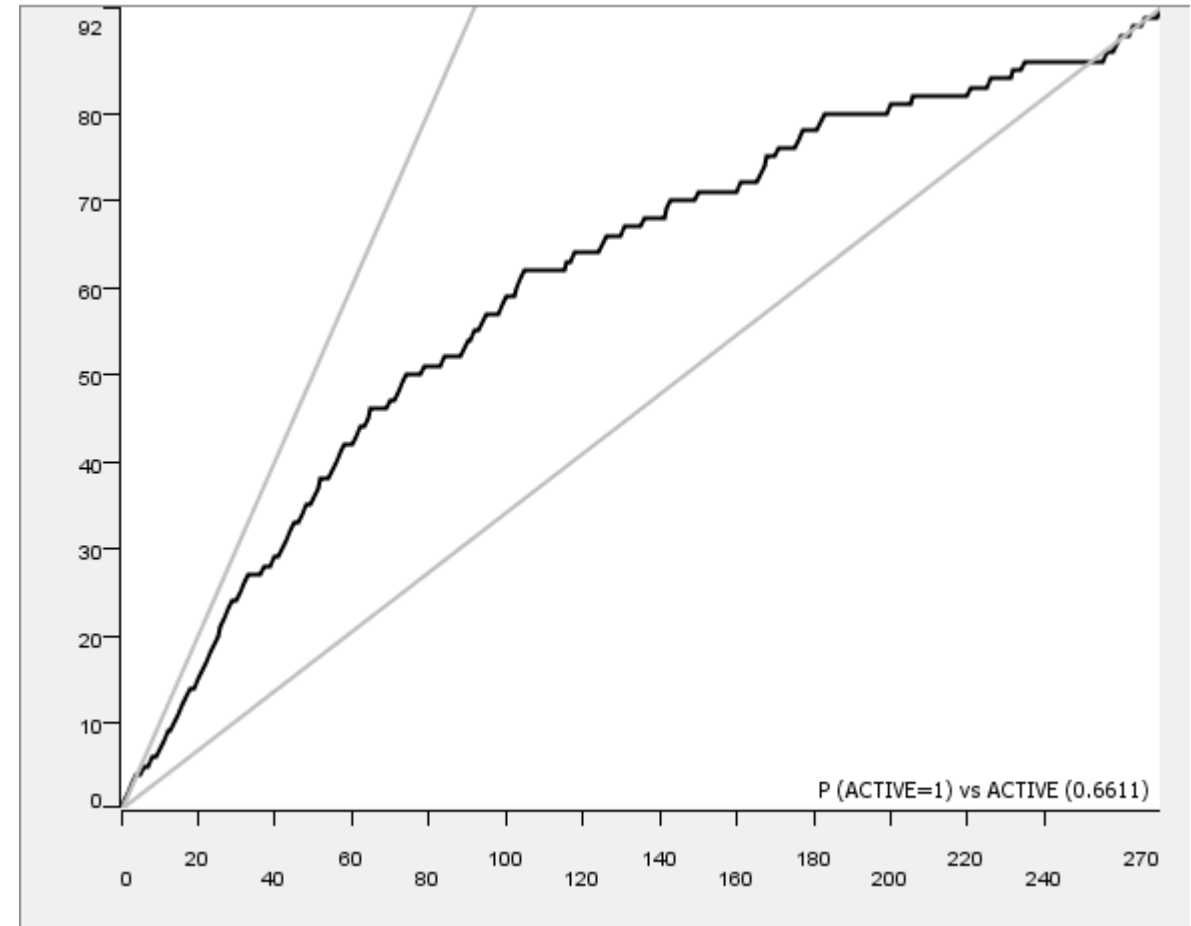

N=270

| Top 10% Mean IC50 | 19.5 nM |
|-------------------|---------|
|-------------------|---------|

|          | Predicted Active | Predicted Inactive |
|----------|------------------|--------------------|
| Active   | 54               | 38                 |
| Inactive | 36               | 142                |

# < 20 nM DefGood in ALK, 40% error; Random seed = 121783

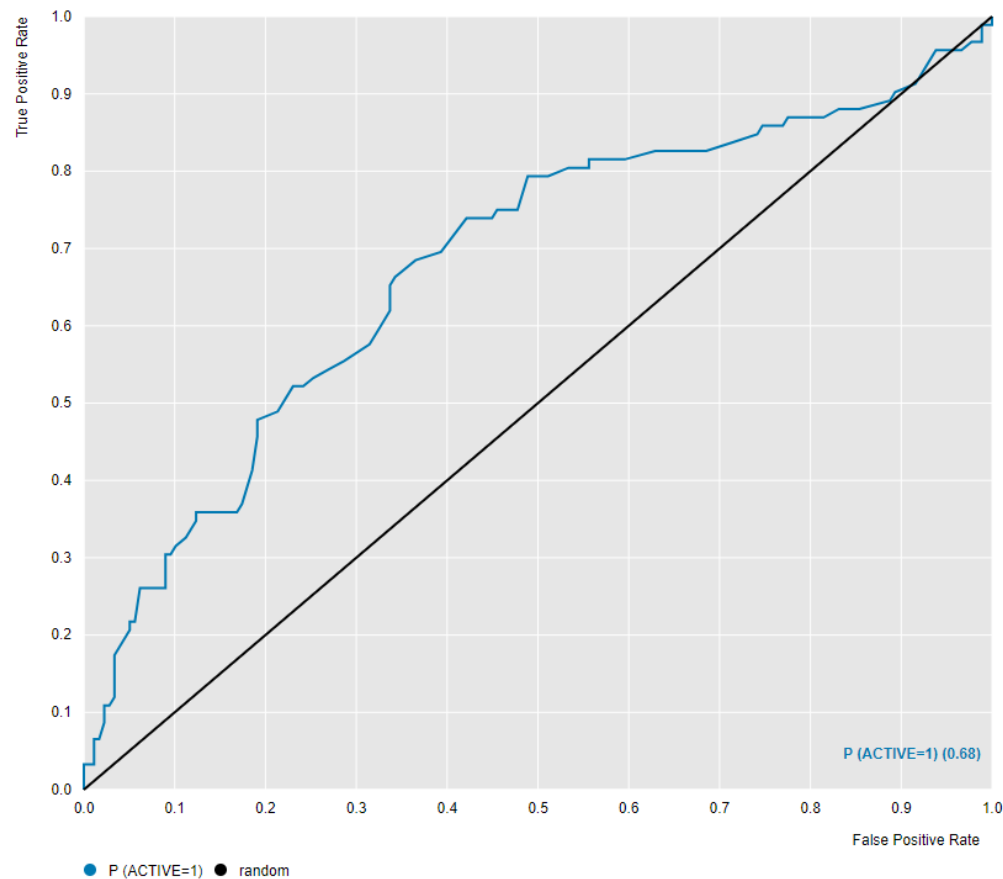

N=270

Top 10% Mean  
IC50

128 nM

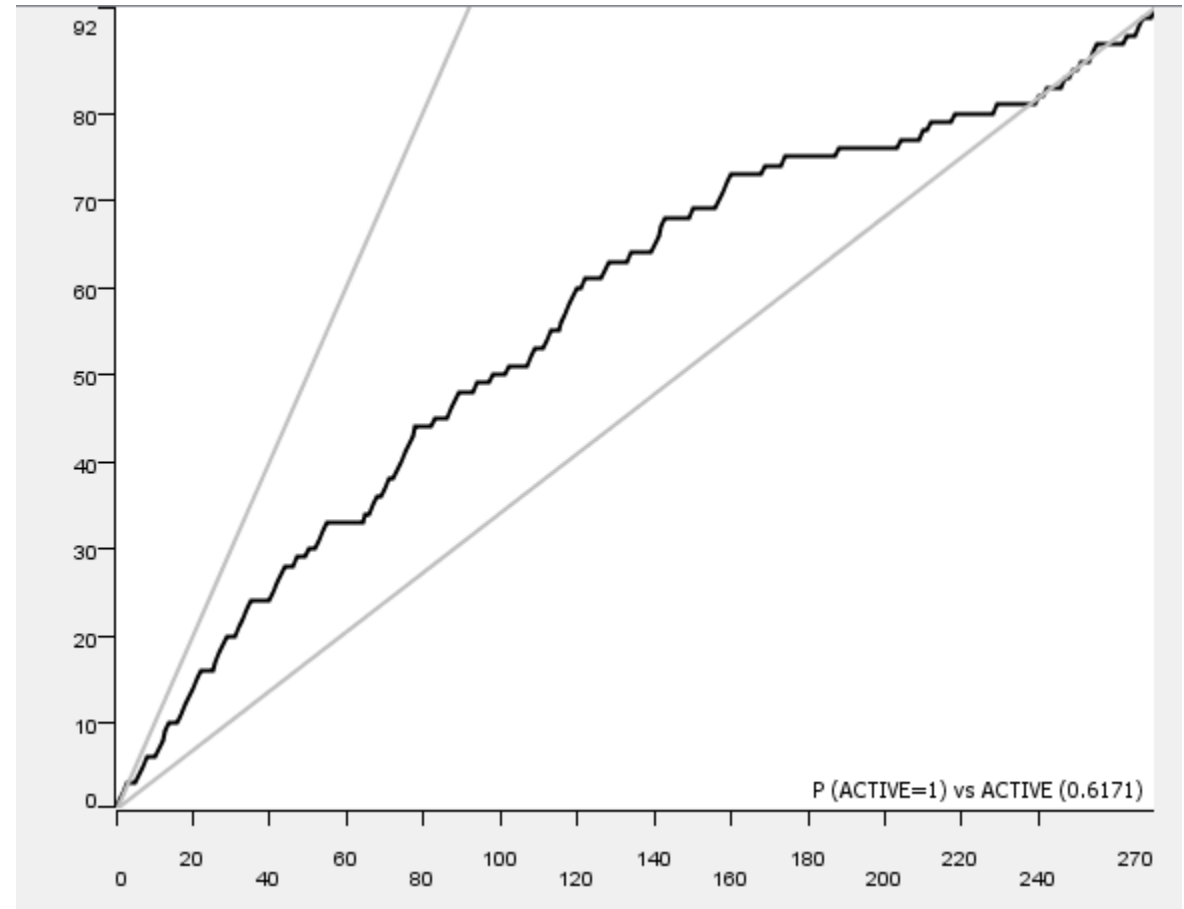

|          | Predicted Active | Predicted Inactive |
|----------|------------------|--------------------|
| Active   | 53               | 39                 |
| Inactive | 56               | 122                |

# Conclusion - RF

- A Random Forrest could be generated for ALK with a decision value of  $<20$  nM as defined as active. The predictivity of the algorithm could be preserved in three random train/test cycles as error was introduced in the training set. The point of failure was 30%, 35% and 40% error.

PNN - <20 nM DefGood in ALK, 5% error ;  
Random seed = 1515533876005

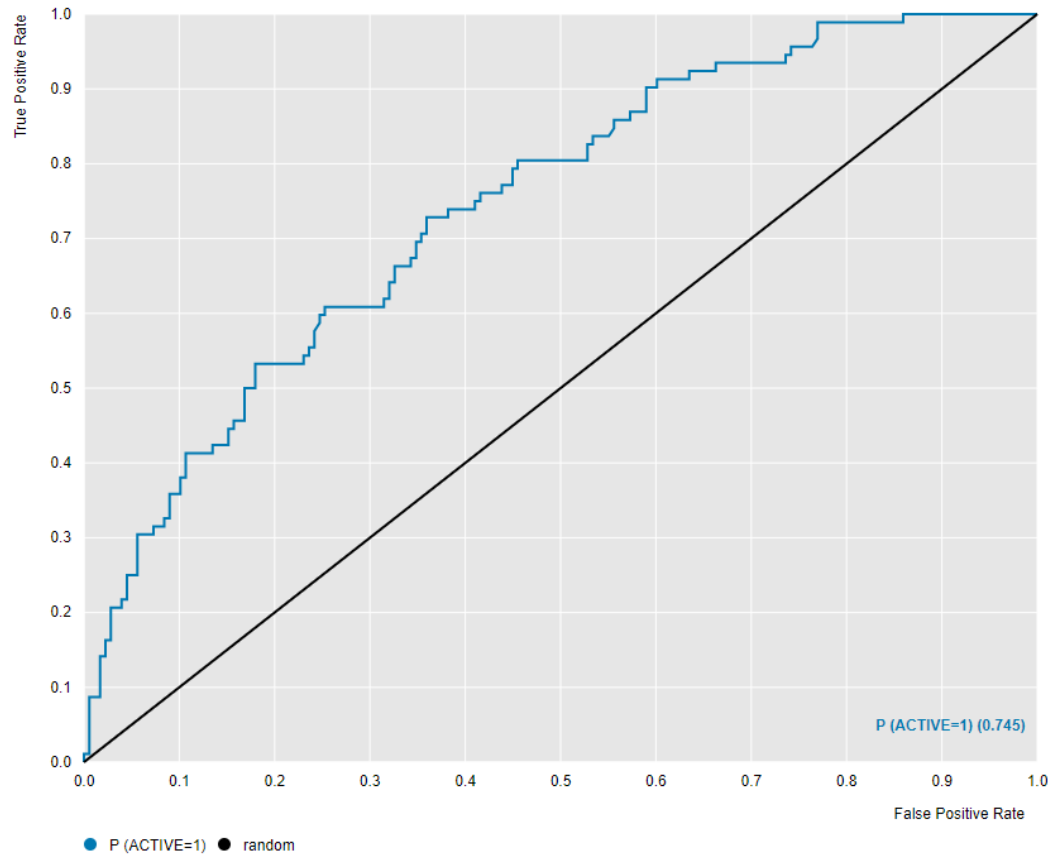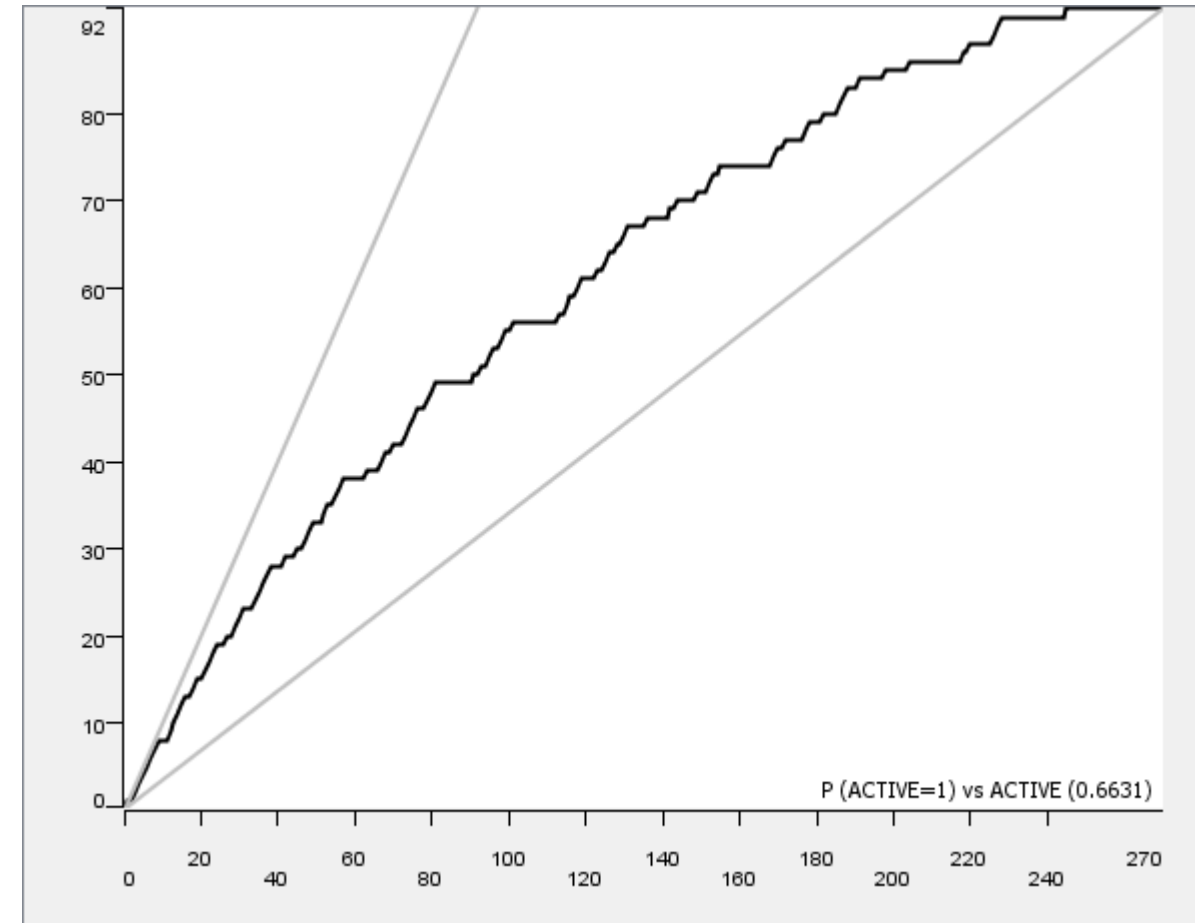

N=270

Top 10% Mean IC50

223 nM

|          | Predicted Active | Predicted Inactive |
|----------|------------------|--------------------|
| Active   | 49               | 43                 |
| Inactive | 33               | 145                |



# PNN - < 20 nM DefGood in ALK, 10% error

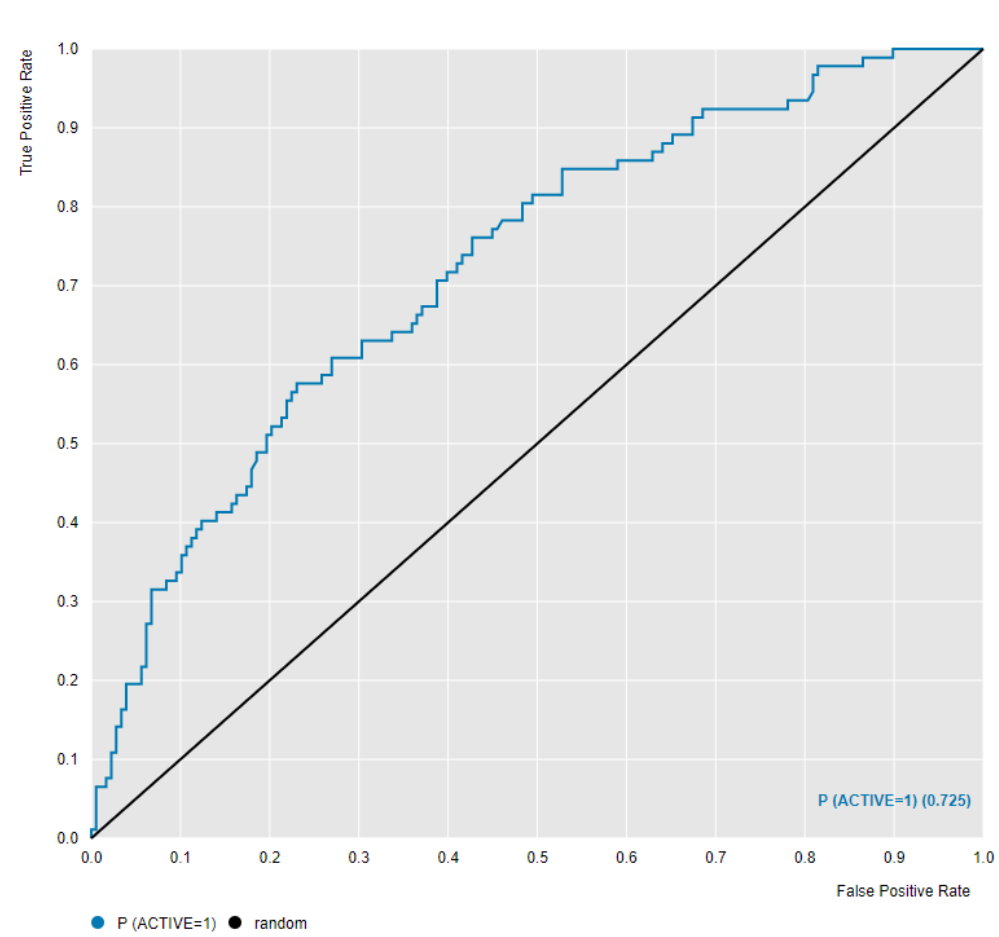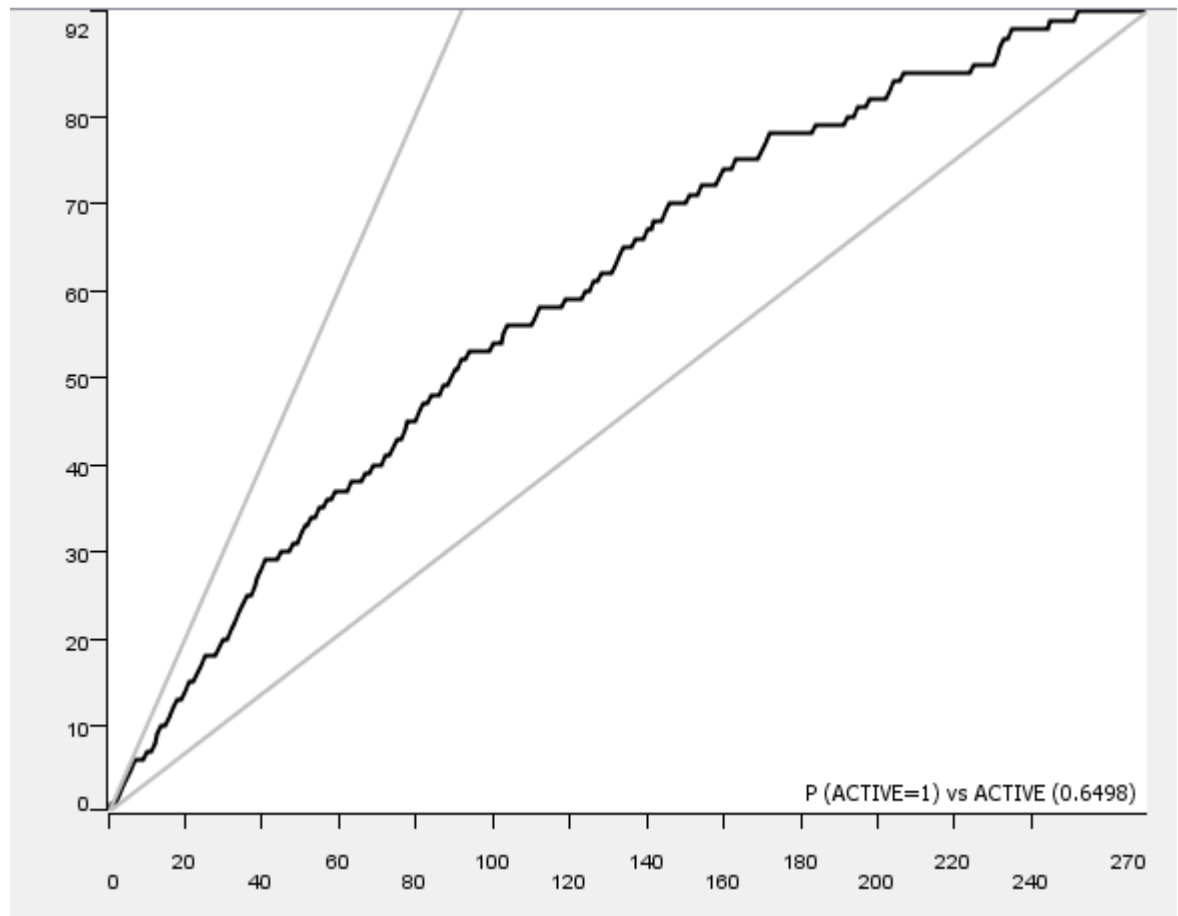

N=270

|                   |        |
|-------------------|--------|
| Top 10% Mean IC50 | 440 nM |
|-------------------|--------|

|          | Predicted Active | Predicted Inactive |
|----------|------------------|--------------------|
| Active   | 51               | 41                 |
| Inactive | 40               | 138                |

# PNN - < 20 nM DefGood in ALK, 15% error

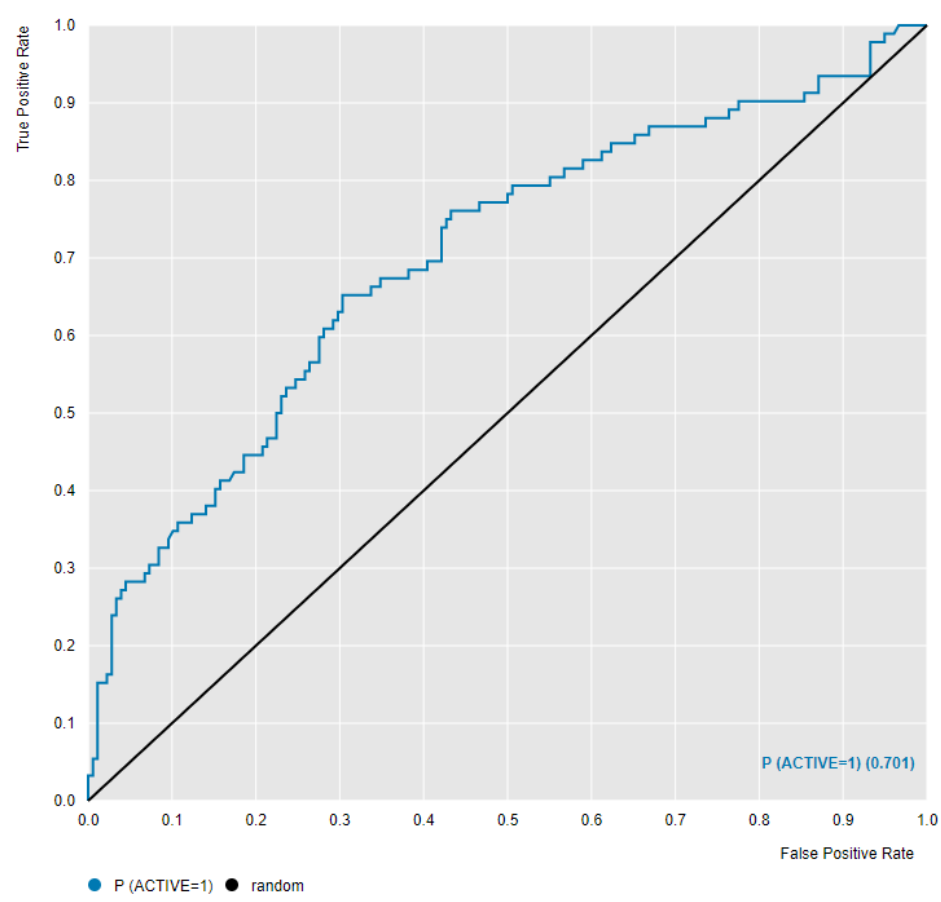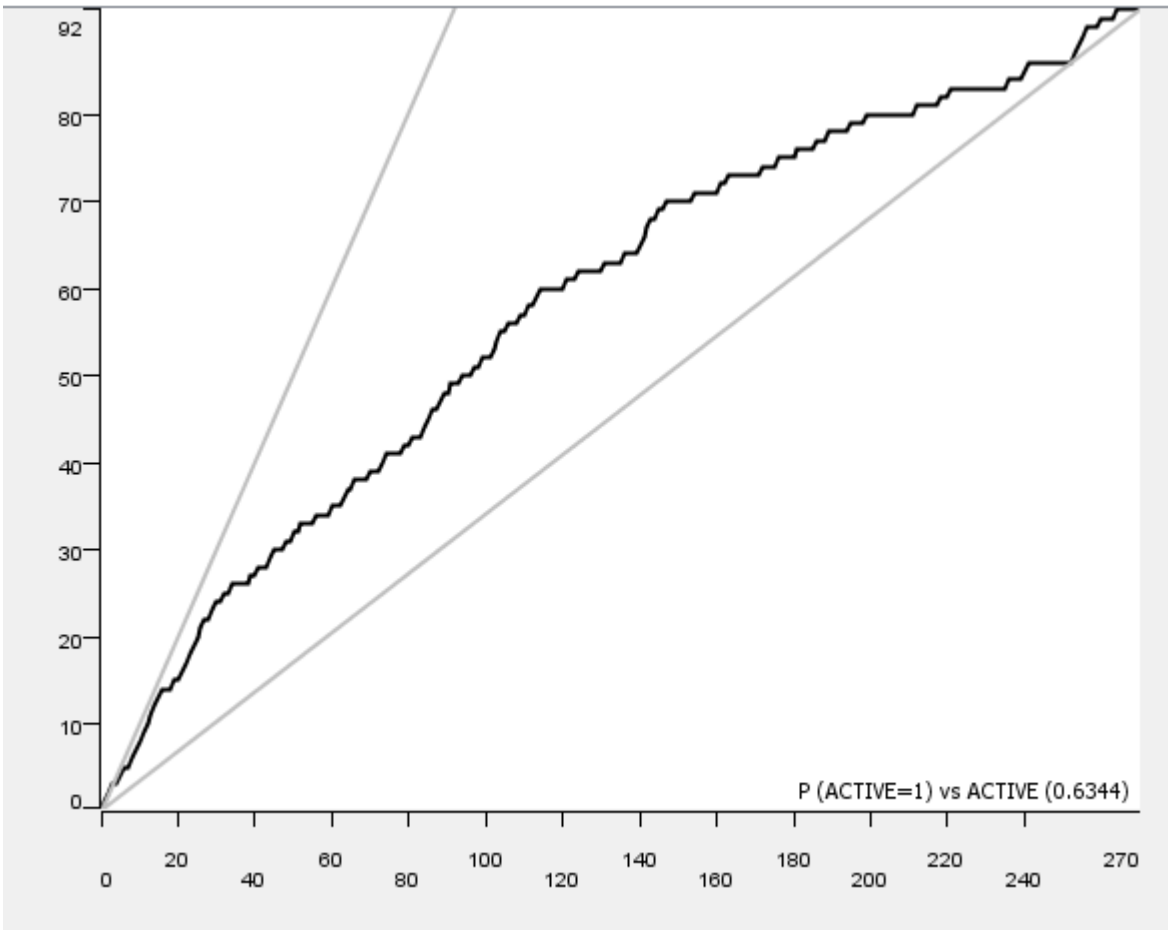

N=270

|                   |       |
|-------------------|-------|
| Top 10% Mean IC50 | 14 nM |
|-------------------|-------|

|          | Predicted Active | Predicted Inactive |
|----------|------------------|--------------------|
| Active   | 33               | 59                 |
| Inactive | 22               | 156                |

# PNN - < 20 nM DefGood in ALK, 20% error

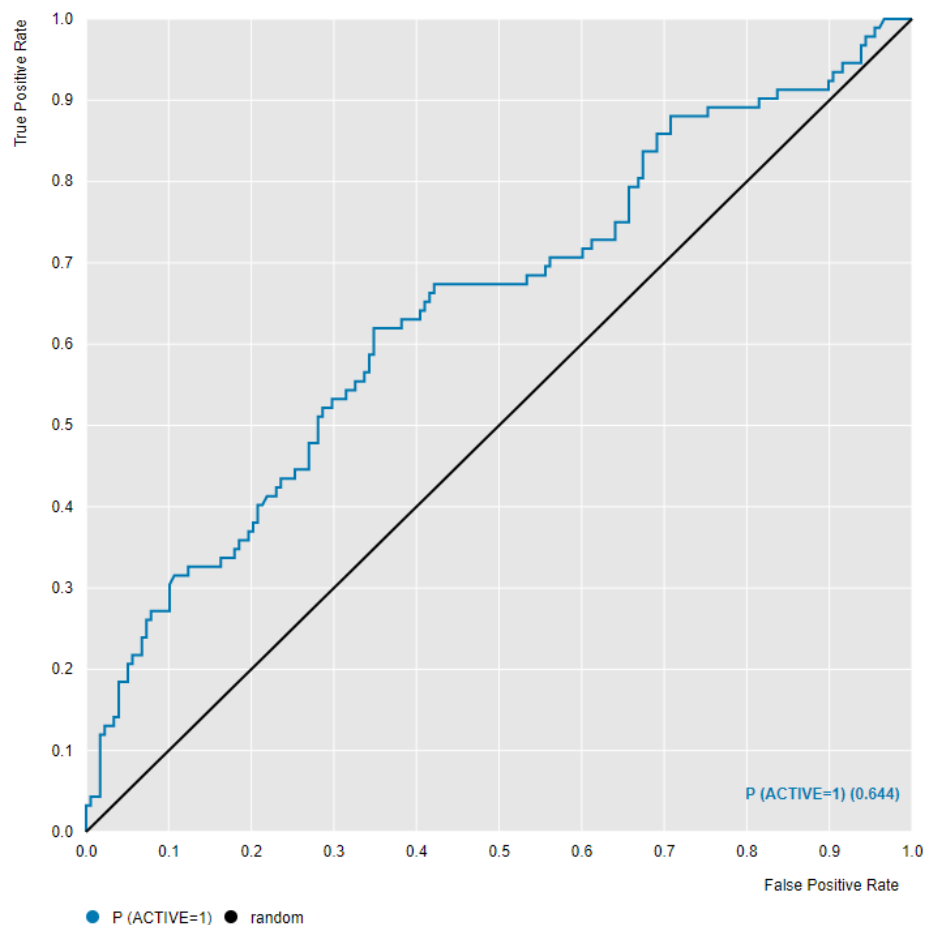

N=270

| Top 10% Mean IC50 | 1,400 nM |
|-------------------|----------|
|-------------------|----------|

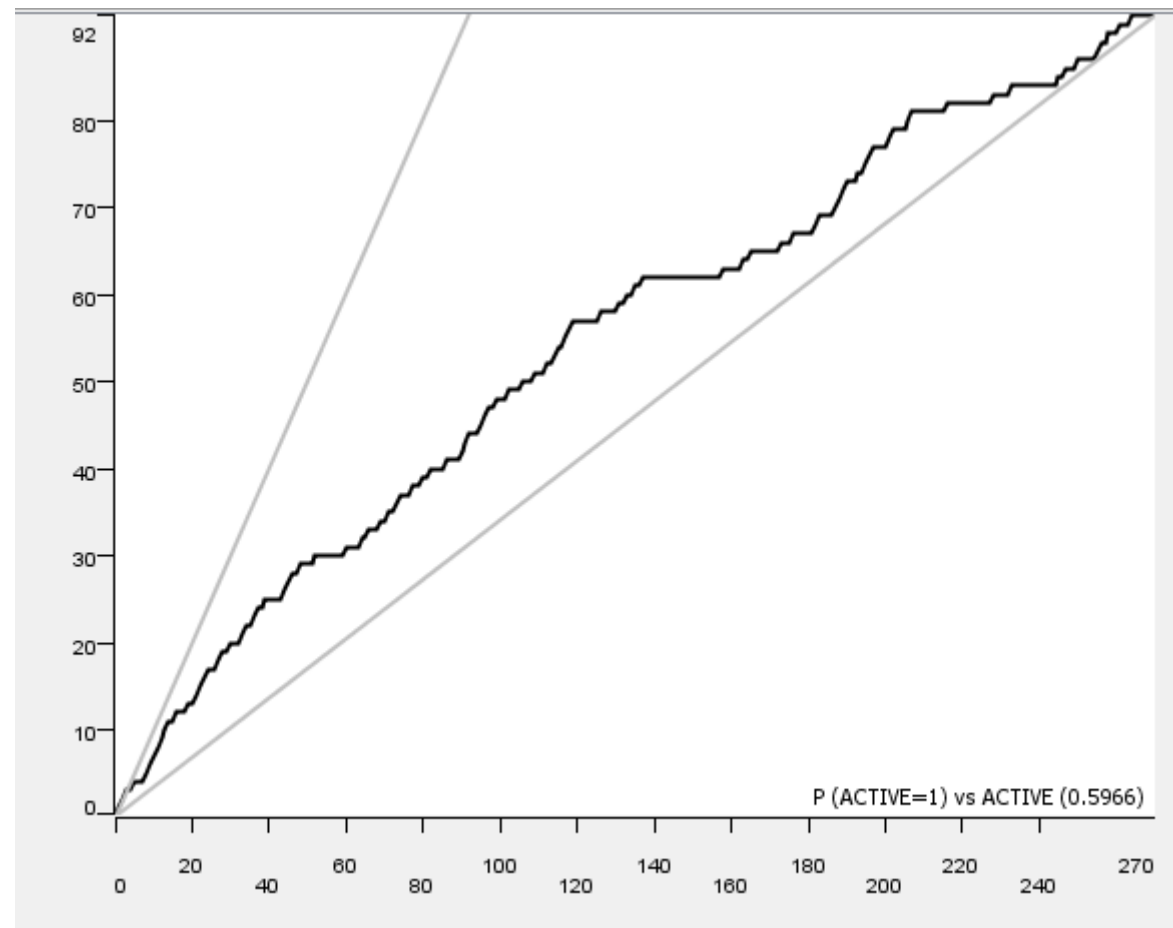

|          | Predicted Active | Predicted Inactive |
|----------|------------------|--------------------|
| Active   | 32               | 60                 |
| Inactive | 33               | 145                |

PNN - < 20 nM DefGood in ALK, 20% error  
(reparametrized; (0.95, 0.85) (Theta minus and plus)

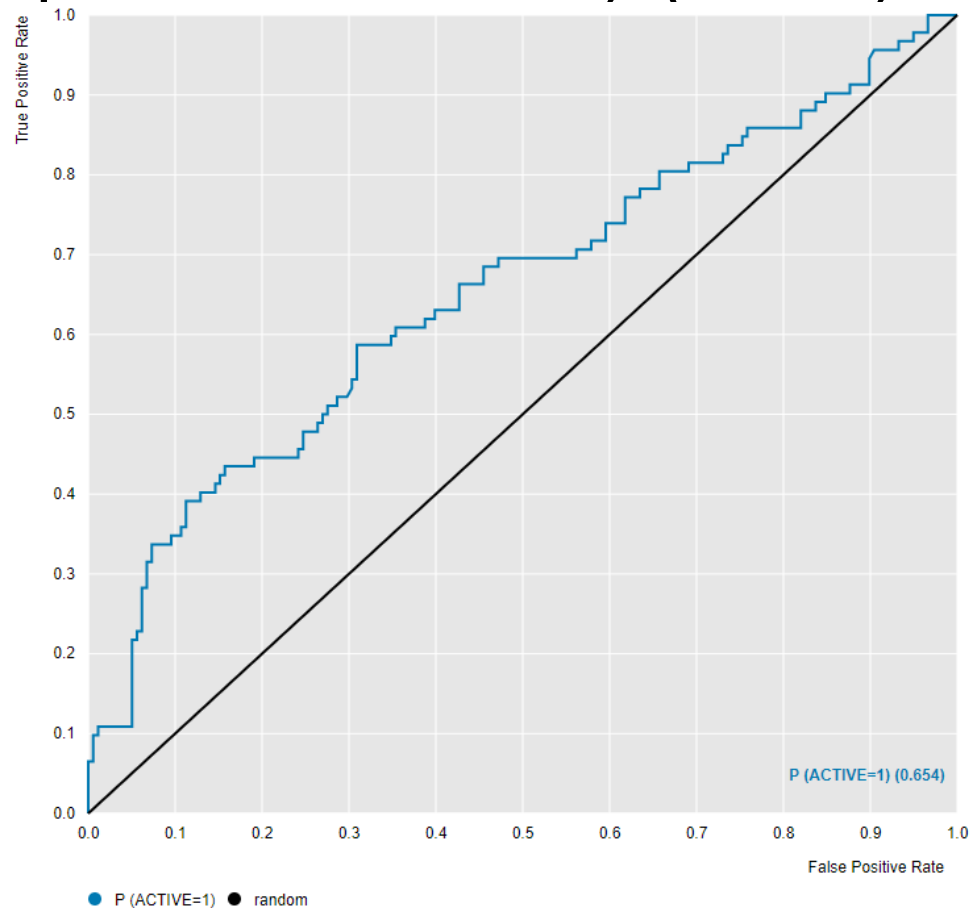

N=270

|                      |        |
|----------------------|--------|
| Top 10% Mean<br>IC50 | 779 nM |
|----------------------|--------|

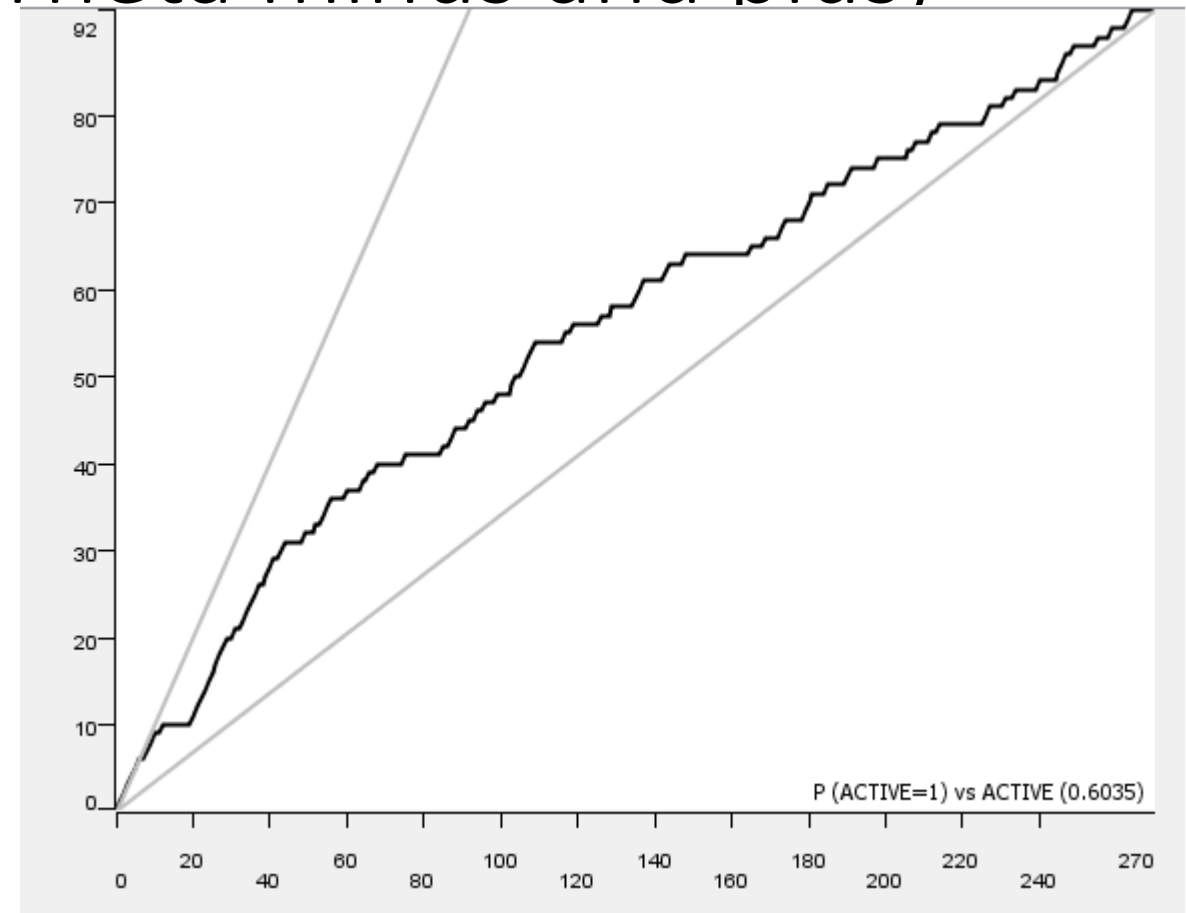

|          | Predicted Active | Predicted Inactive |
|----------|------------------|--------------------|
| Active   | 25               | 67                 |
| Inactive | 11               | 167                |

PNN - < 20 nM DefGood in ALK, 15% error;  
Random seed = 429

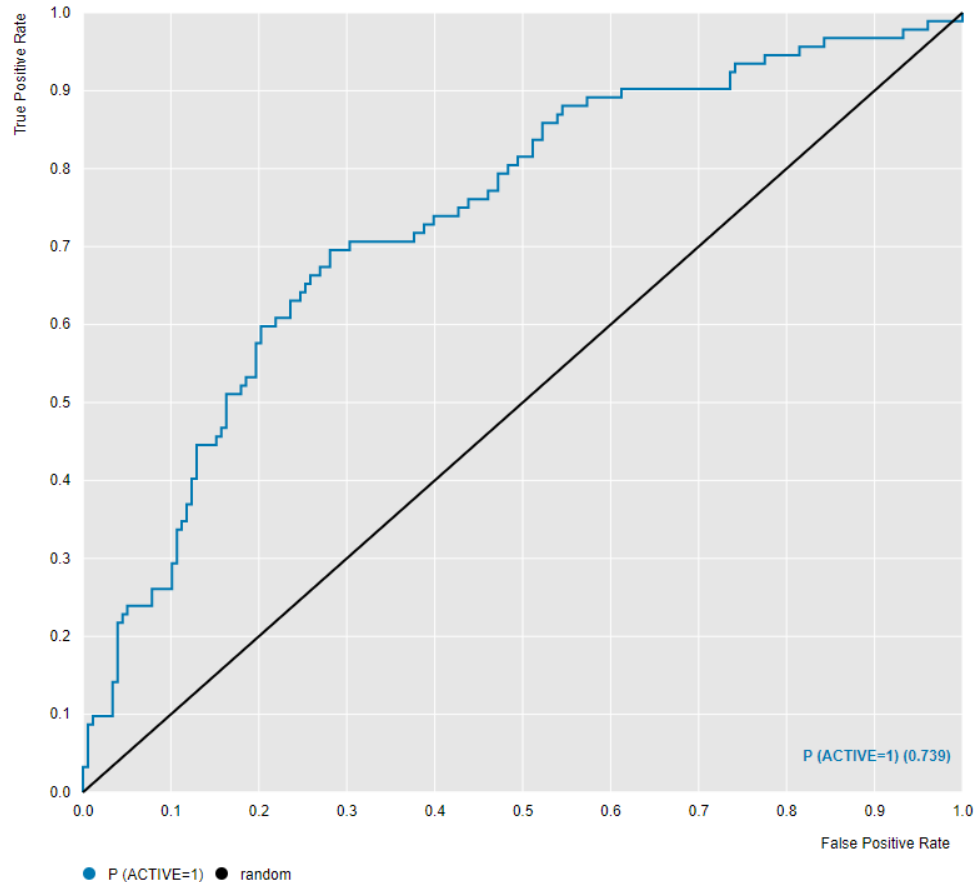

N=270

|                      |        |
|----------------------|--------|
| Top 10% Mean<br>IC50 | 552 nM |
|----------------------|--------|

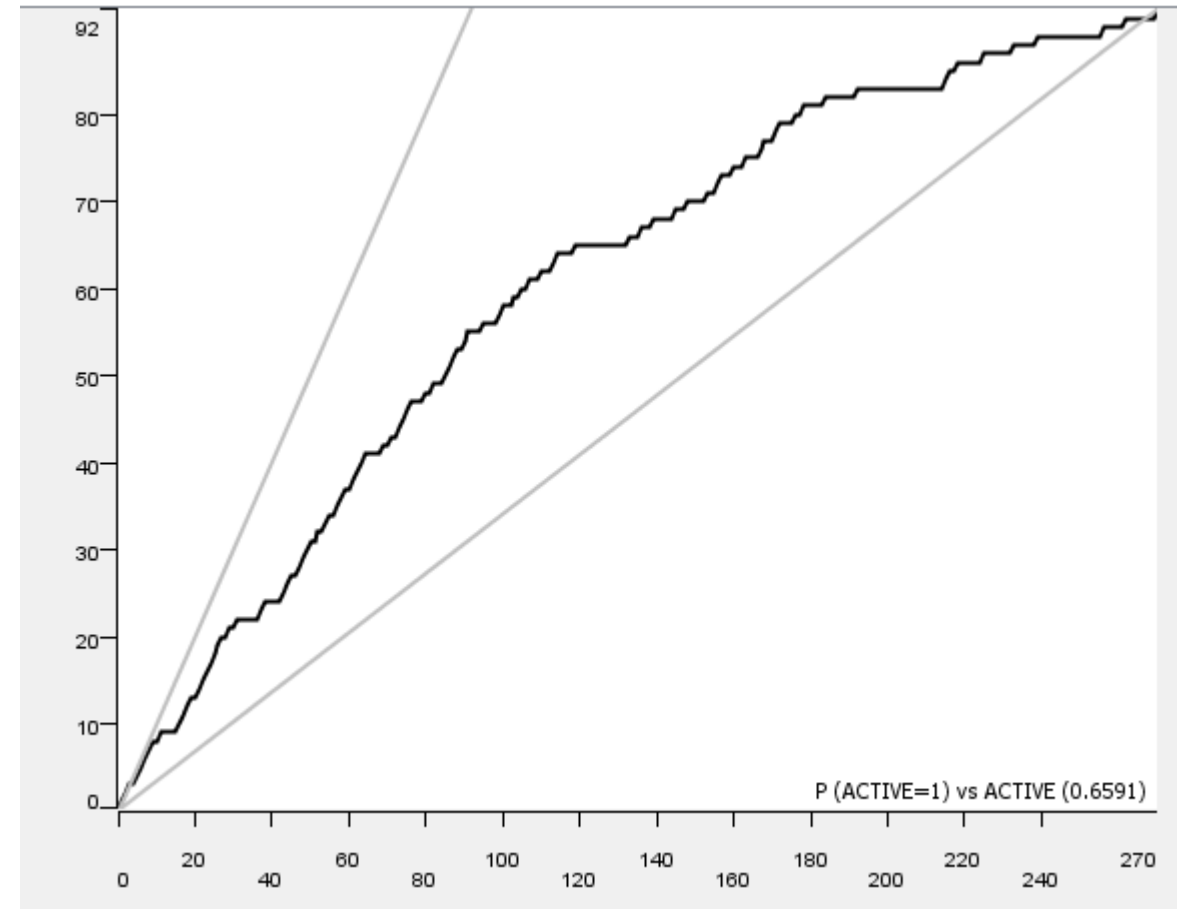

|          | Predicted Active | Predicted Inactive |
|----------|------------------|--------------------|
| Active   | 45               | 47                 |
| Inactive | 29               | 149                |

# PNN - < 20 nM DefGood in ALK, 20% error ;

## Random seed = 429

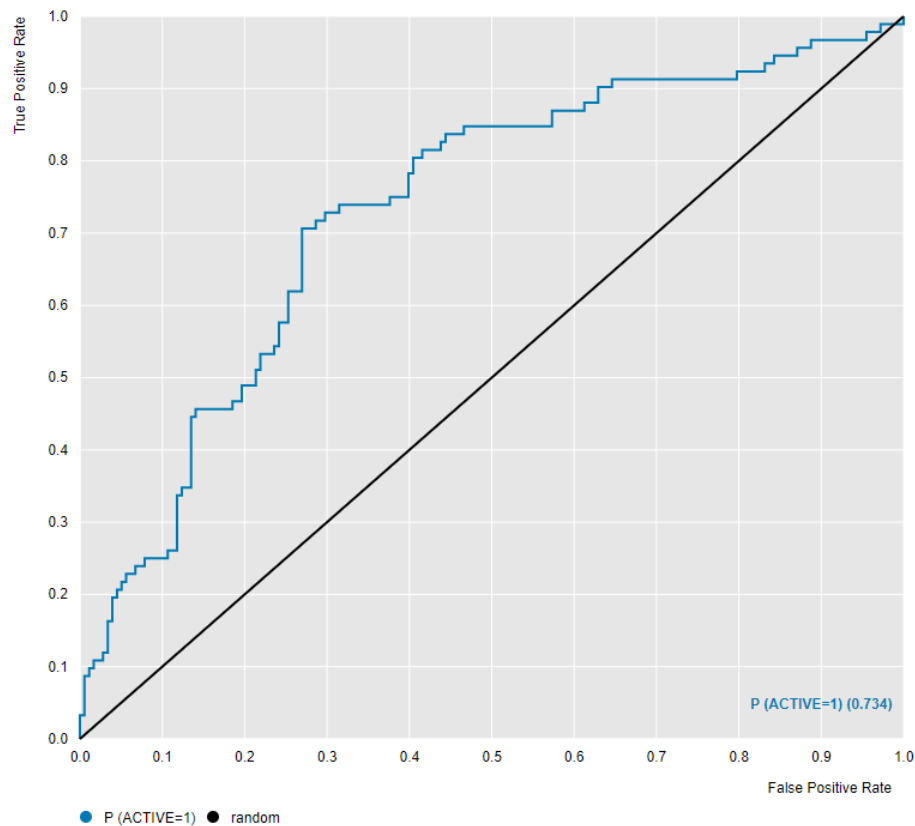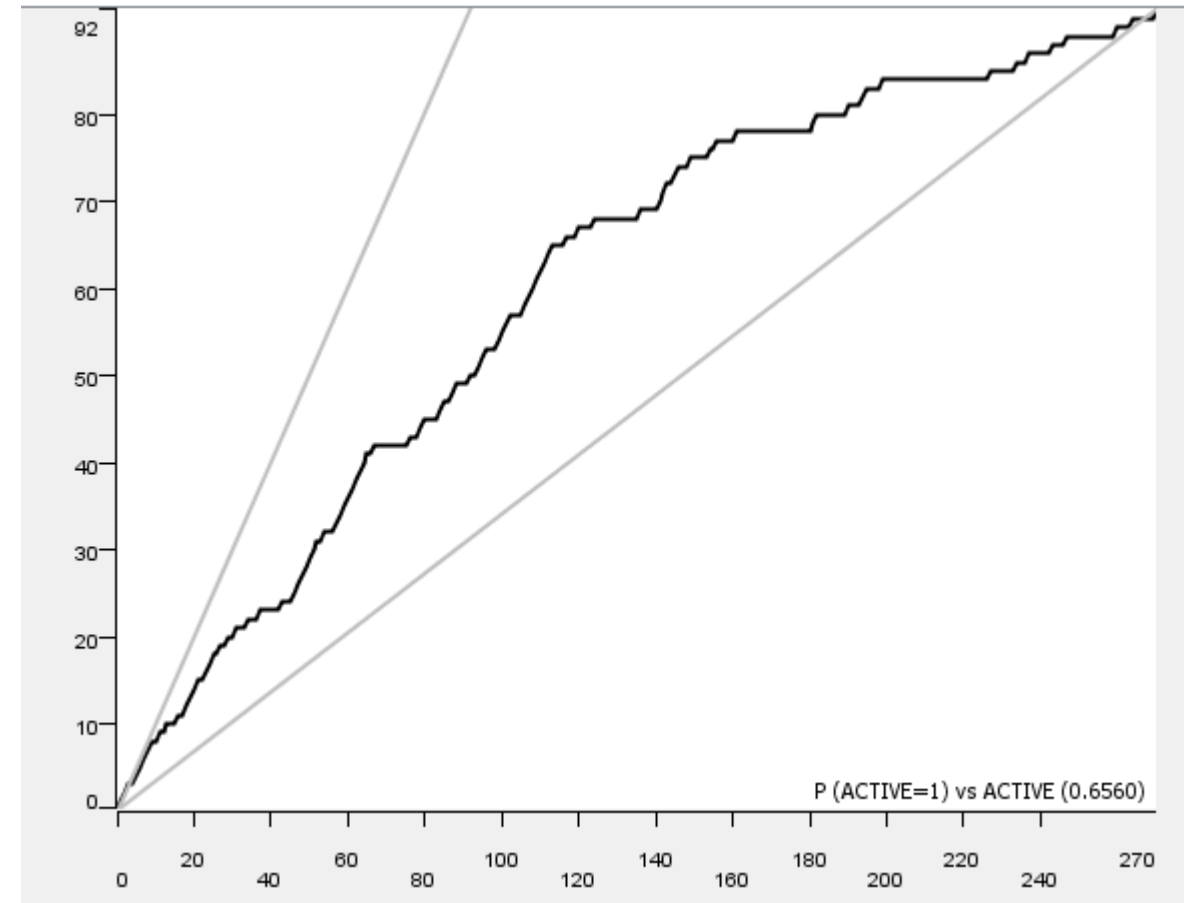

N=270

Top 10% Mean IC50

600 nM

|          | Predicted Active | Predicted Inactive |
|----------|------------------|--------------------|
| Active   | 45               | 47                 |
| Inactive | 35               | 143                |

# PNN - < 20 nM DefGood in ALK, 25% error ;

## Random seed = 429

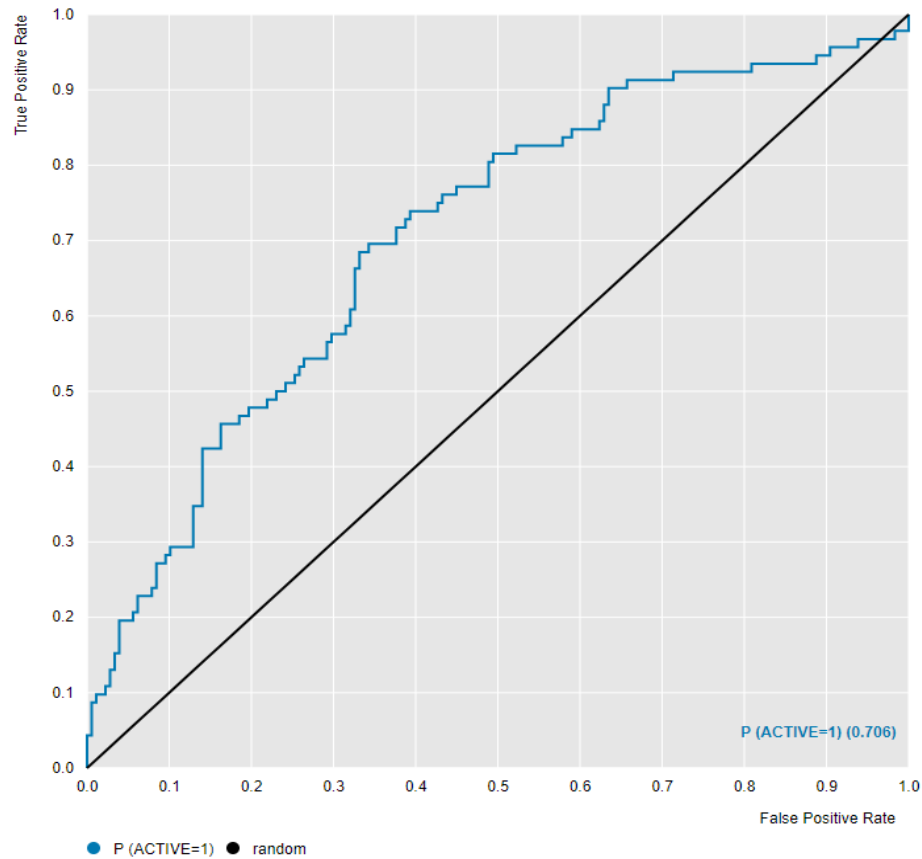

N=270

**Top 10% Mean IC50**      **637 nM**

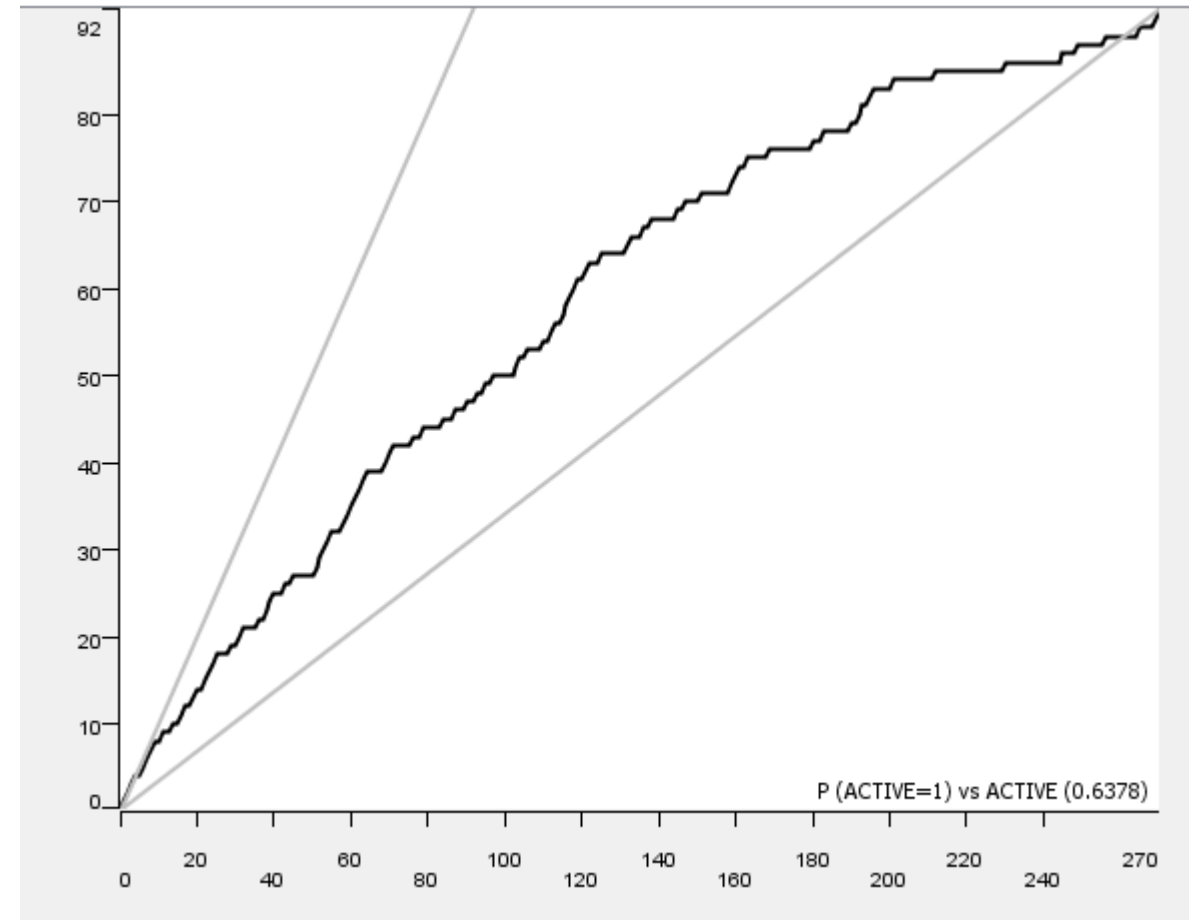

|          | Predicted Active | Predicted Inactive |
|----------|------------------|--------------------|
| Active   | 46               | 46                 |
| Inactive | 41               | 137                |

# PNN - < 20 nM DefGood in ALK, 30% error ;

## Random seed = 429

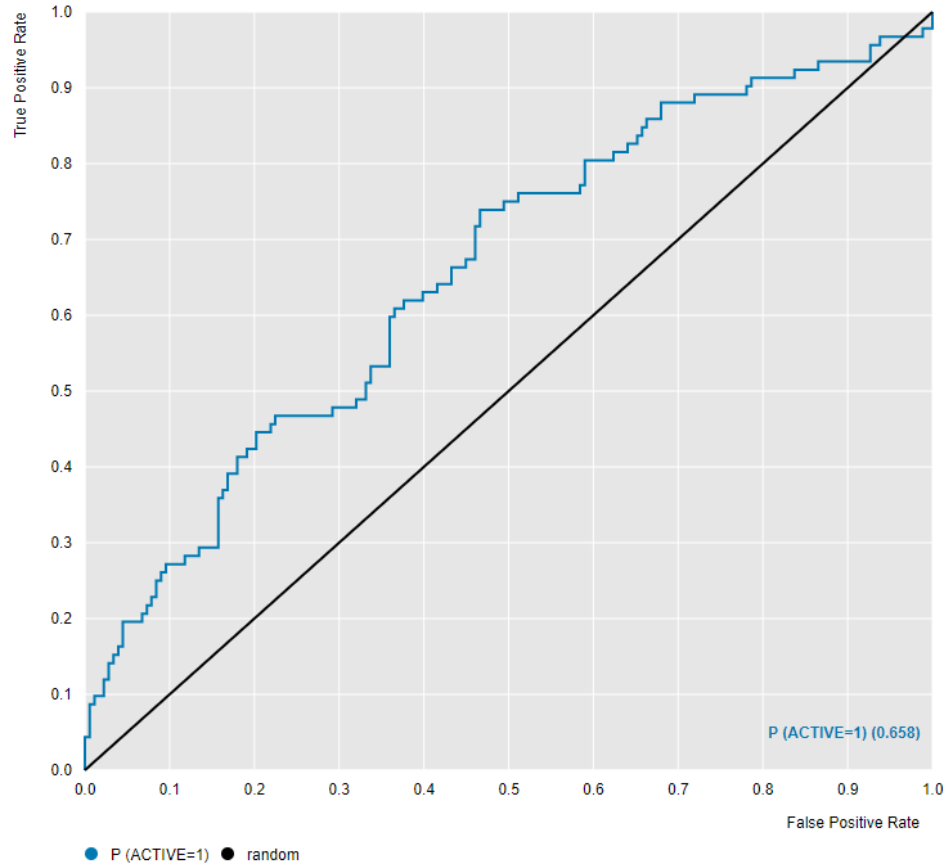

N=270

Top 10% Mean IC50 680 nM

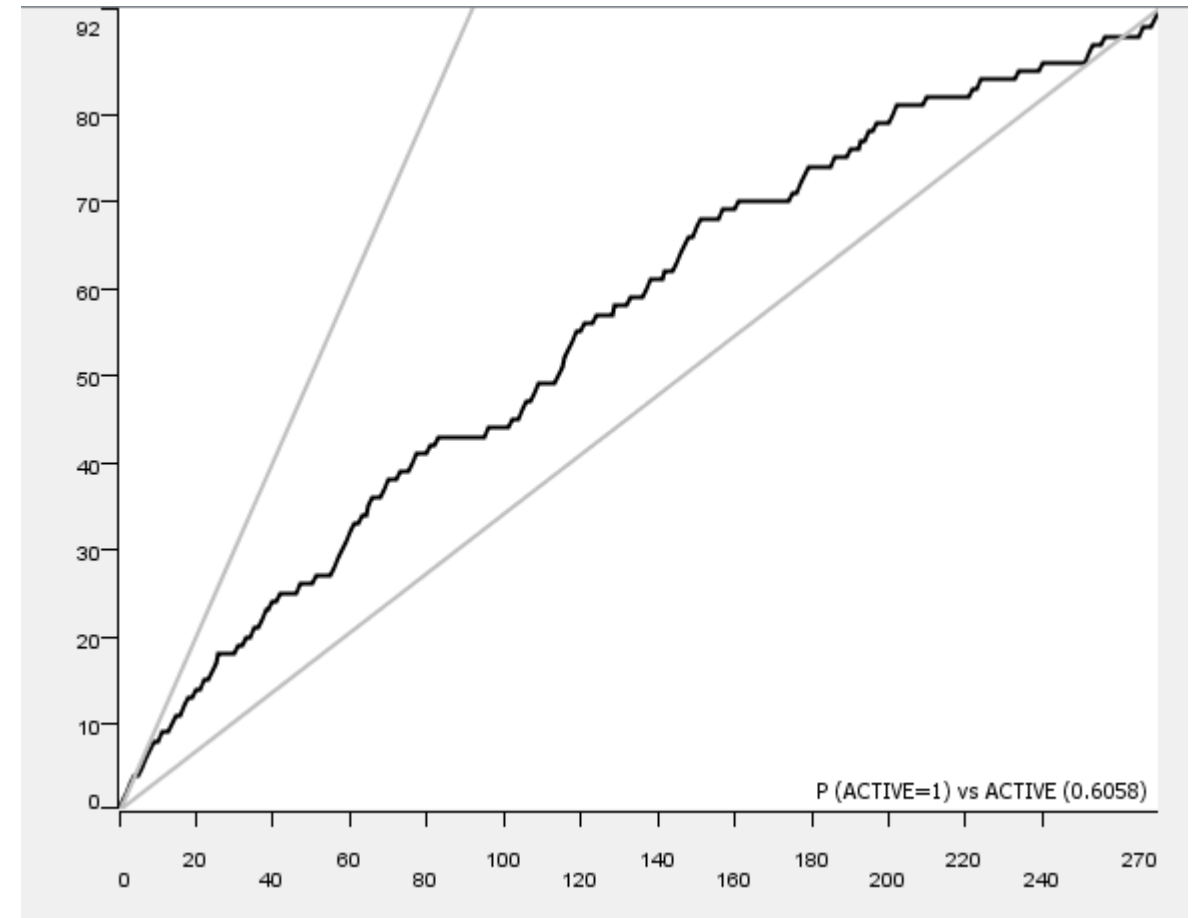

|          | Predicted Active | Predicted Inactive |
|----------|------------------|--------------------|
| Active   | 44               | 48                 |
| Inactive | 55               | 123                |



PNN - < 20 nM DerGood In ALK, 30% error ;  
 Random seed = 429 (reparametrized) Theta minus  
 = 0.75; Theta plus = 0.65

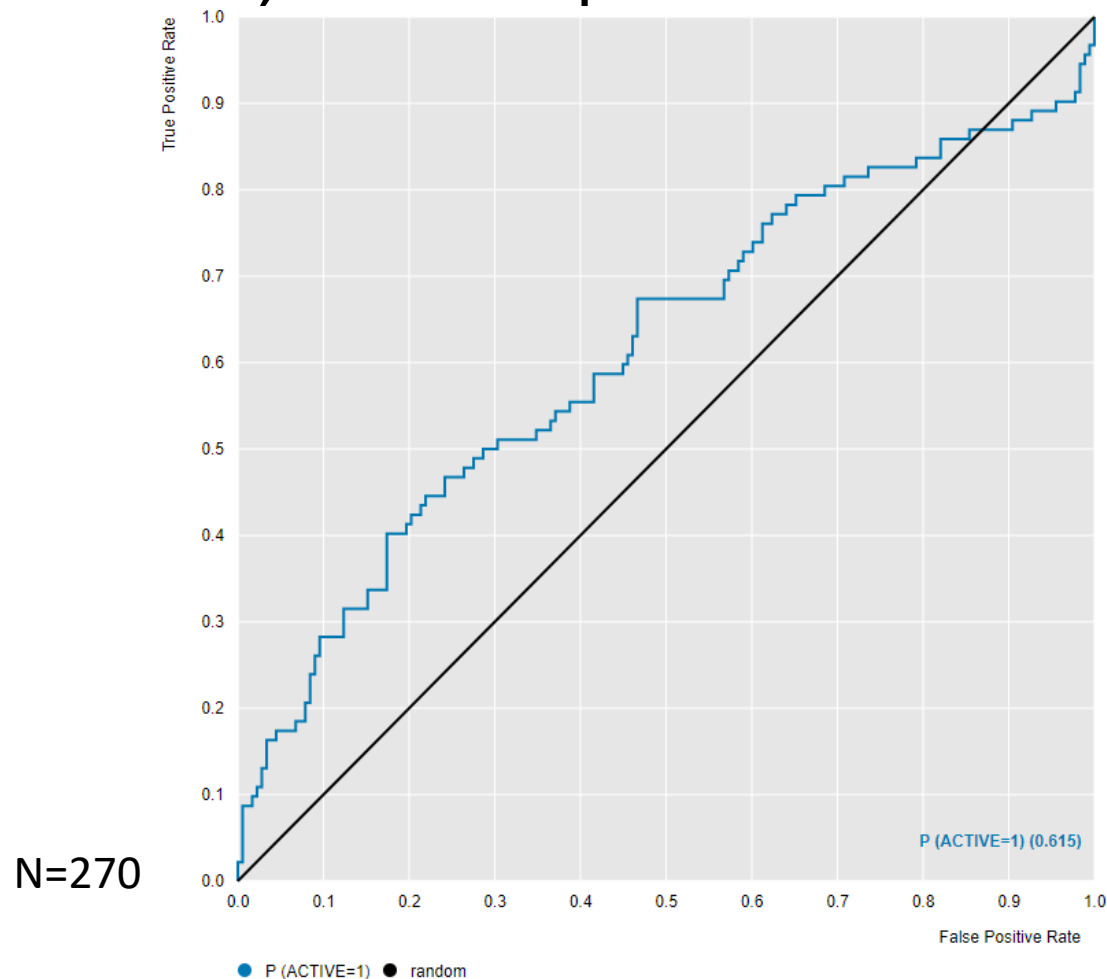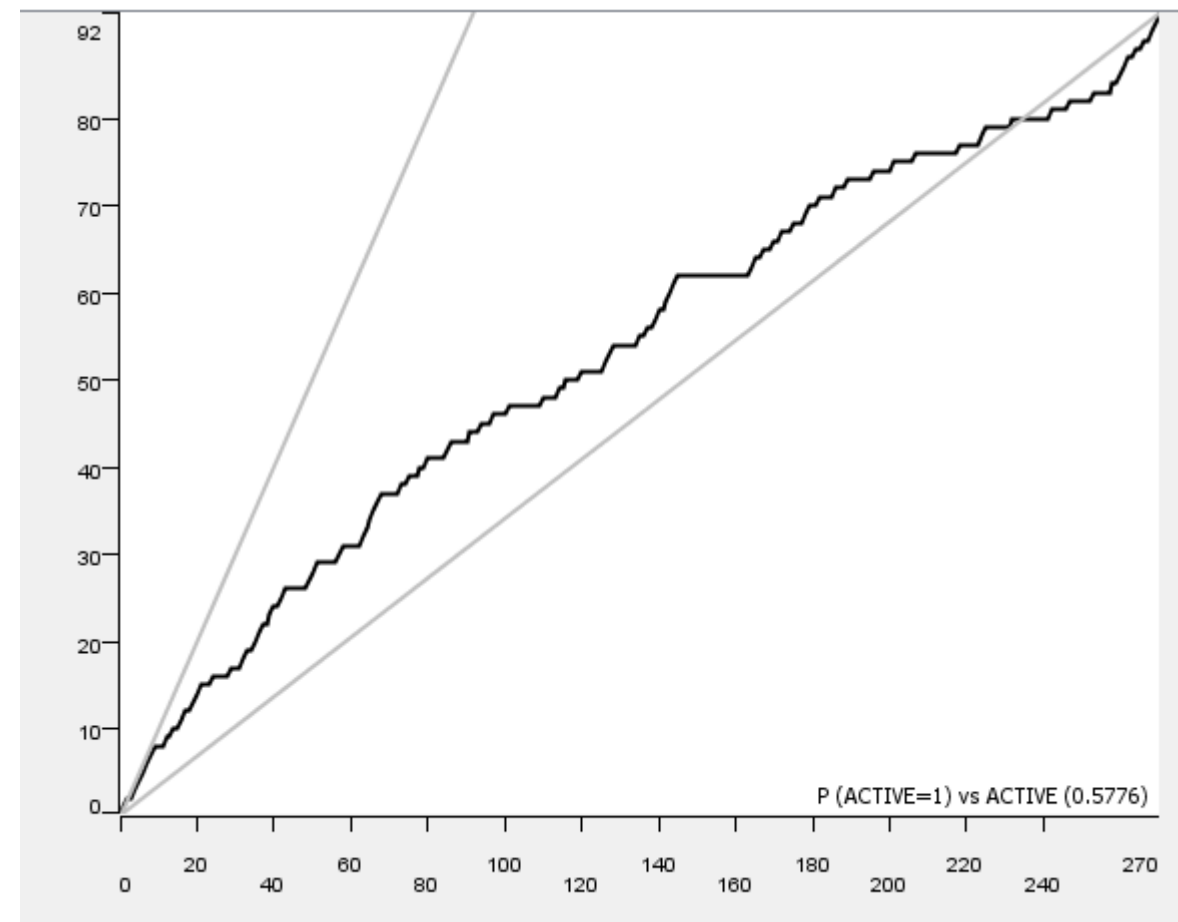

Top 10% Mean IC50

320 nM

|          | Predicted Active | Predicted Inactive |
|----------|------------------|--------------------|
| Active   | 37               | 55                 |
| Inactive | 32               | 146                |

# PNN - < 20 nM DefGood in ALK, 10% error; Random seed = 121783

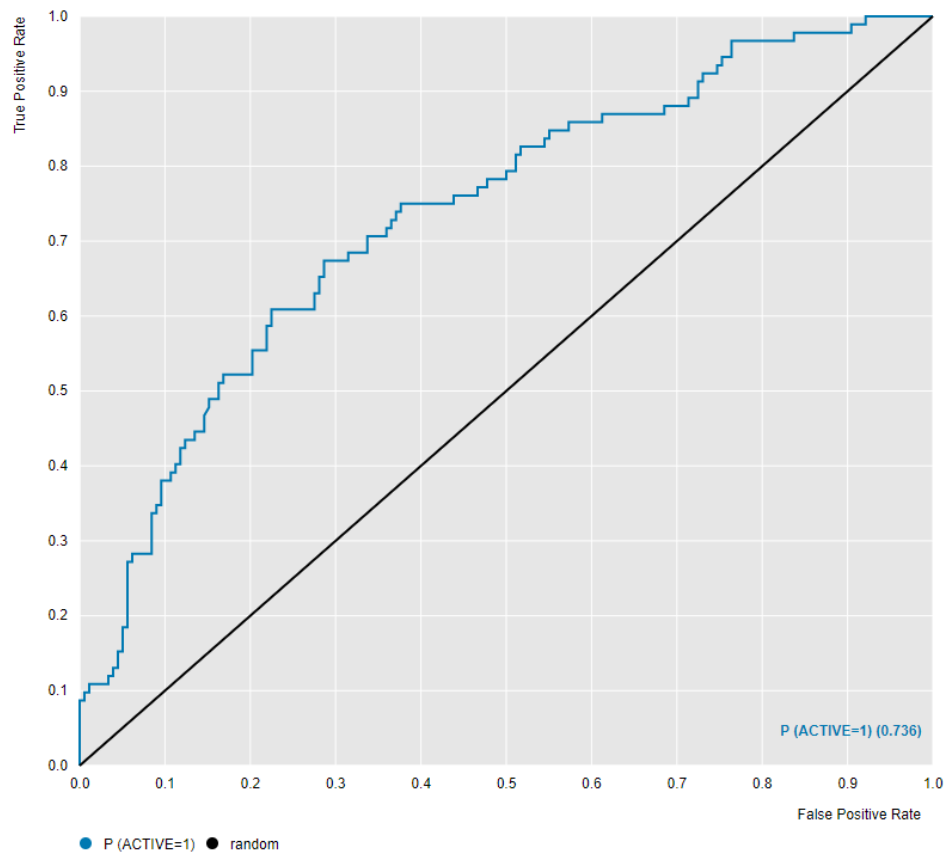

N=270

|                      |        |
|----------------------|--------|
| Top 10% Mean<br>IC50 | 375 nM |
|----------------------|--------|

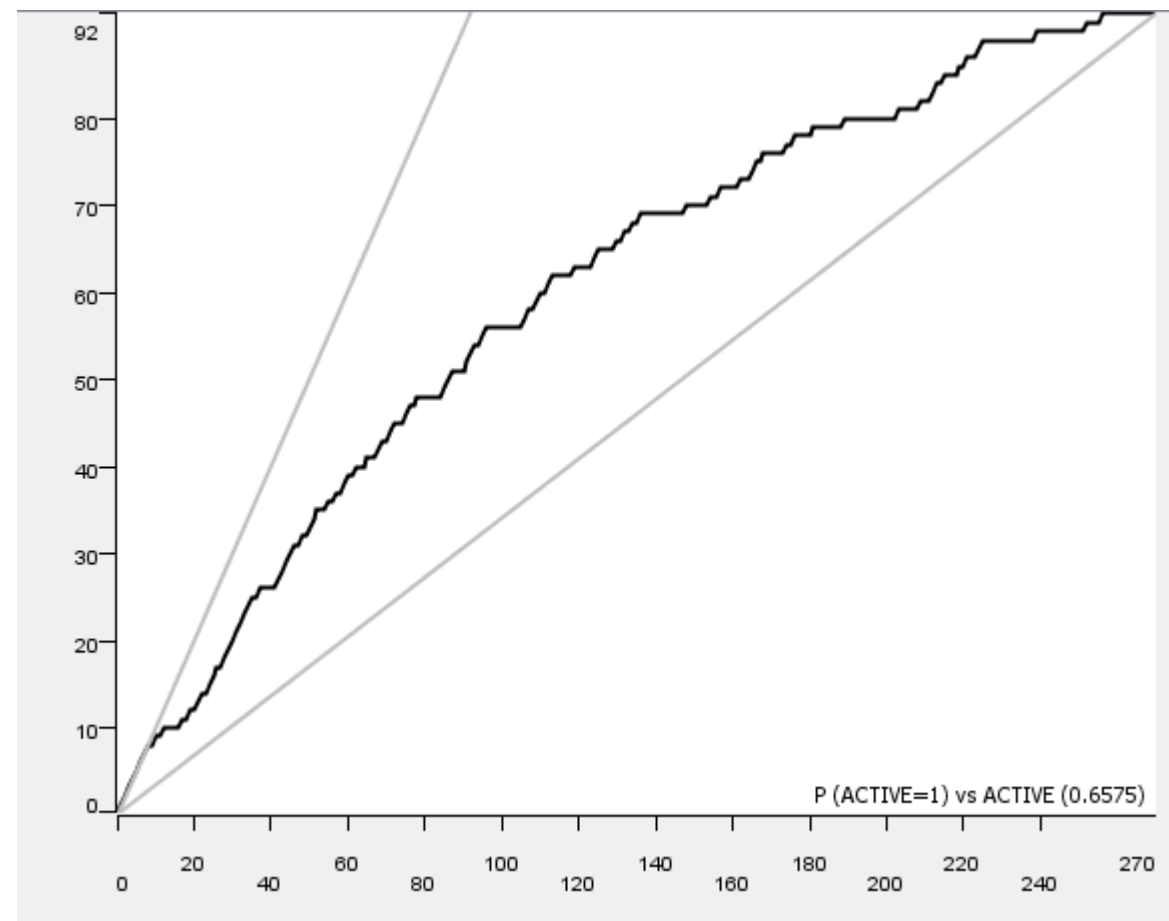

|          | Predicted Active | Predicted Inactive |
|----------|------------------|--------------------|
| Active   | 44               | 48                 |
| Inactive | 27               | 151                |

PNN - < 20 nM DefGood in ALK, 15% error;  
Random seed = 121783

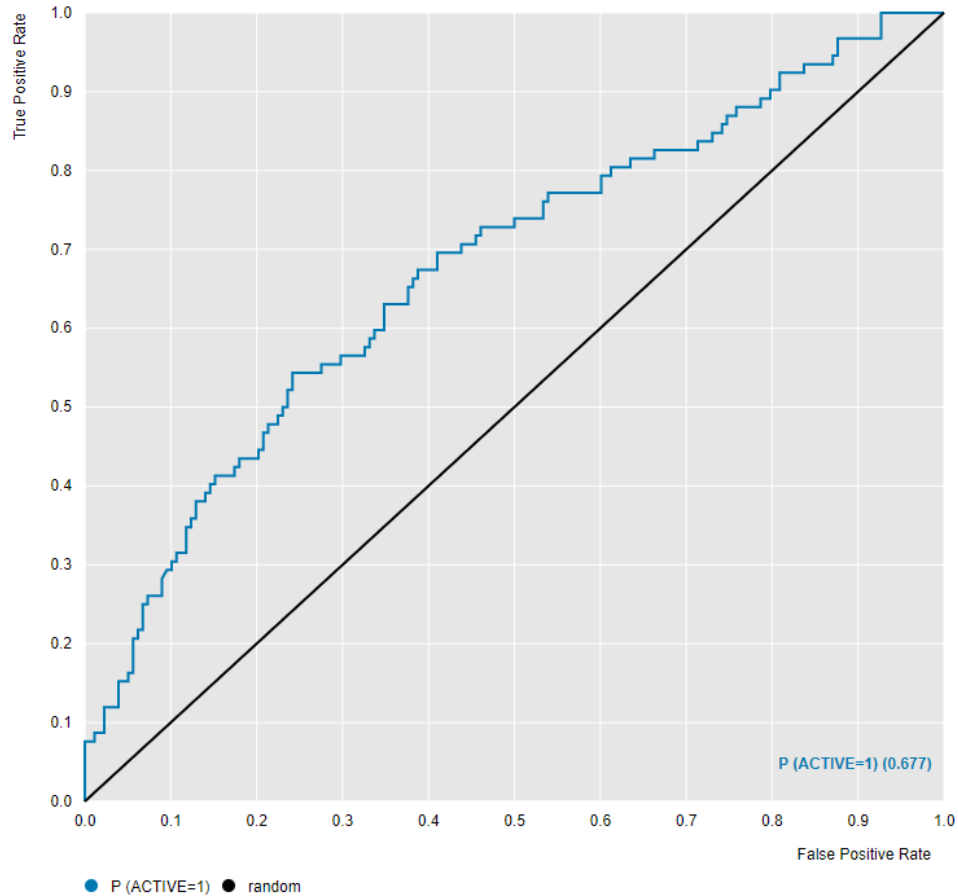

N=270

| Top 10% Mean<br>IC50 | 115 nM |
|----------------------|--------|
|----------------------|--------|

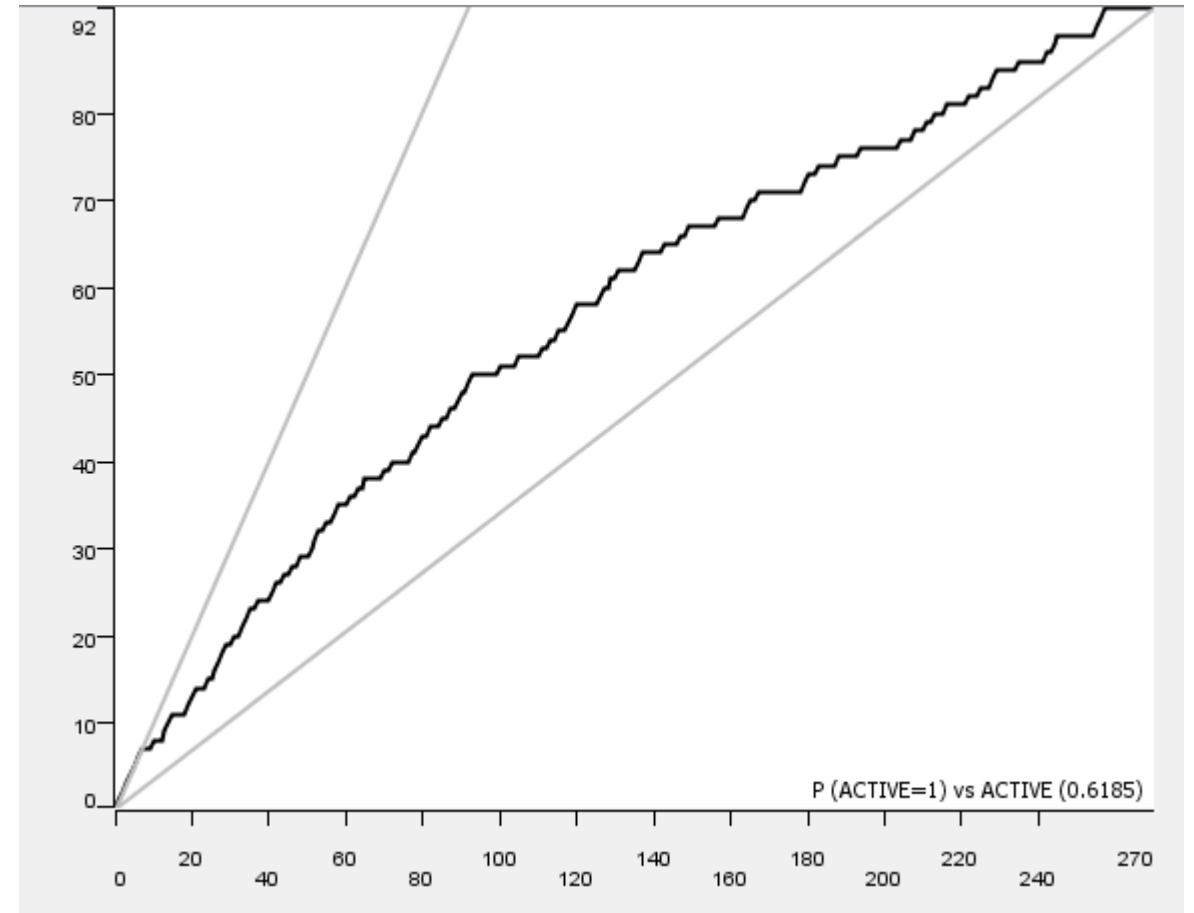

|          | Predicted Active | Predicted Inactive |
|----------|------------------|--------------------|
| Active   | 37               | 55                 |
| Inactive | 26               | 152                |

# PNN - < 20 nM DefGood in ALK, 20% error; Random seed = 121783

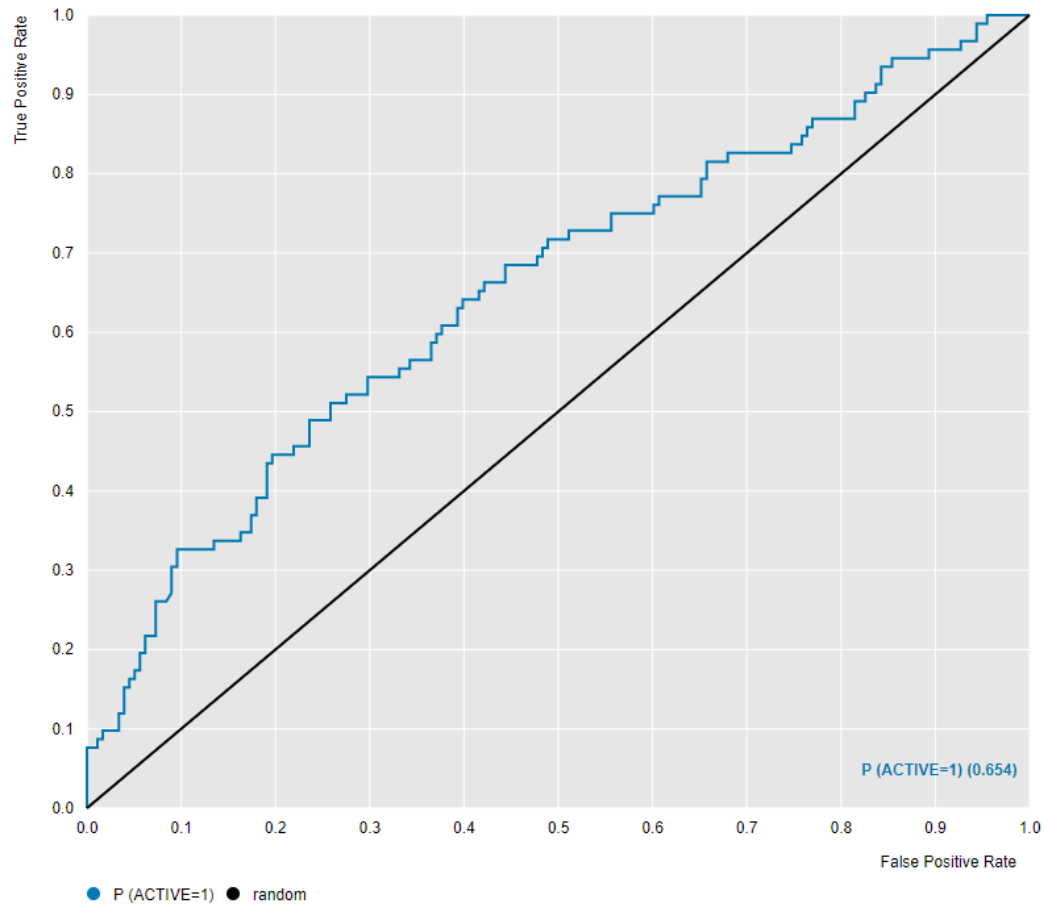

N=270

| Top 10% Mean<br>IC50 | 115 nM |
|----------------------|--------|
|----------------------|--------|

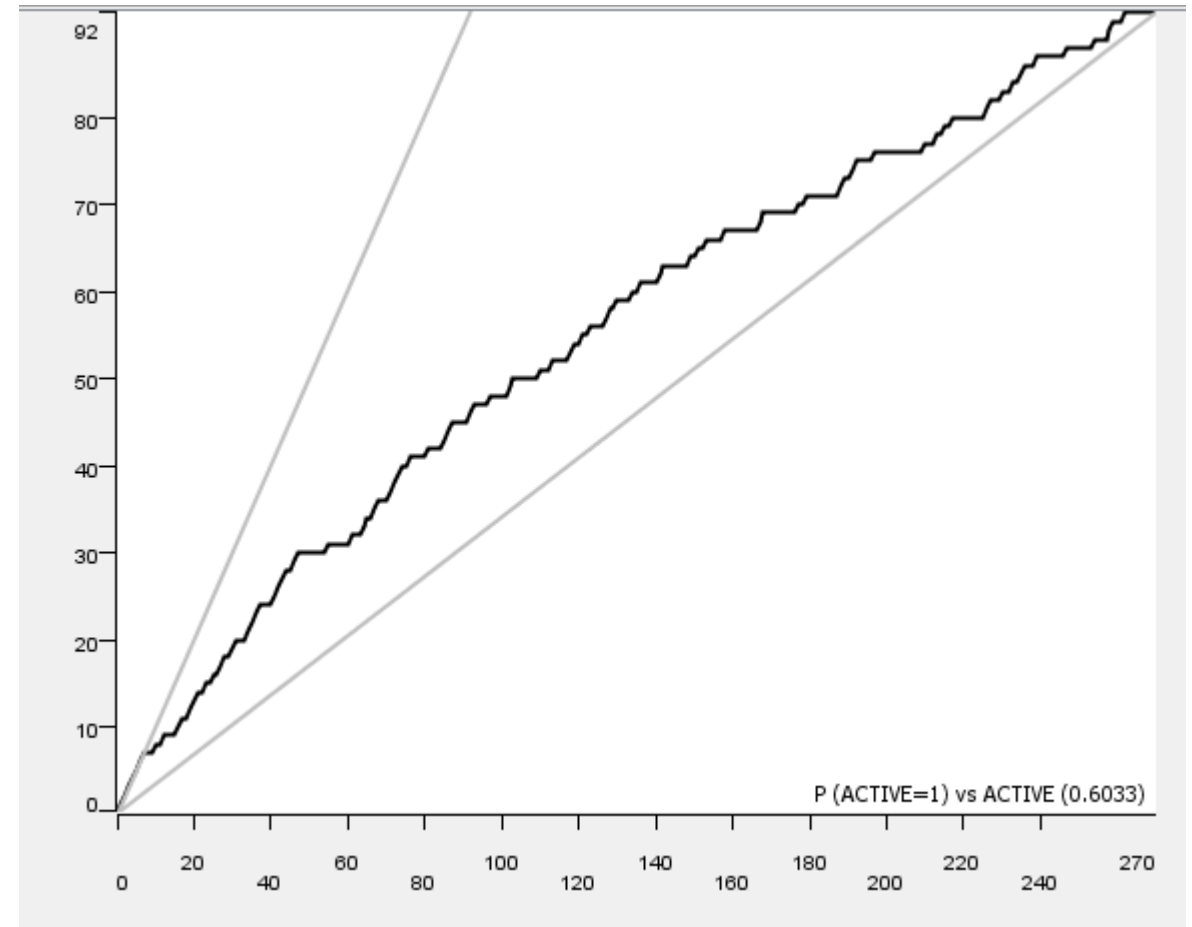

|          | Predicted Active | Predicted Inactive |
|----------|------------------|--------------------|
| Active   | 34               | 58                 |
| Inactive | 31               | 147                |

# Conclusion - PNN

- Across three random seeds, the % error that lead to a significant enrichment failure and/or top 10% IC50 increase in the retrospective test was 20%, 30% and 15% for each unique random seed.
- Finally, reparameterization needs to be undertaken with each dataset. It did not significantly alter the outcomes of when failure was encountered as a result of error. In the future, a model will be parameterized on the original dataset and unaltered for the error experiment.

# Aurora B Kinase

# Aurora B Kinase NBN Design

- Rules -  $\$RELATION\$ = "="$  OR  $\$IC50\$ > 999$  OR  $\$IC50\$ < 10 \Rightarrow TRUE$
- Sort ascending and remove duplicates
- DefGood scanned between 5 and 25 nM
- 80-20 split for both actives and inactives
- NBN – ECFP4 used Classifier where Prediction was Active = True
- Resulted in 1481 compounds after cleaning the data

# <5 nM DefGood in Aurora B

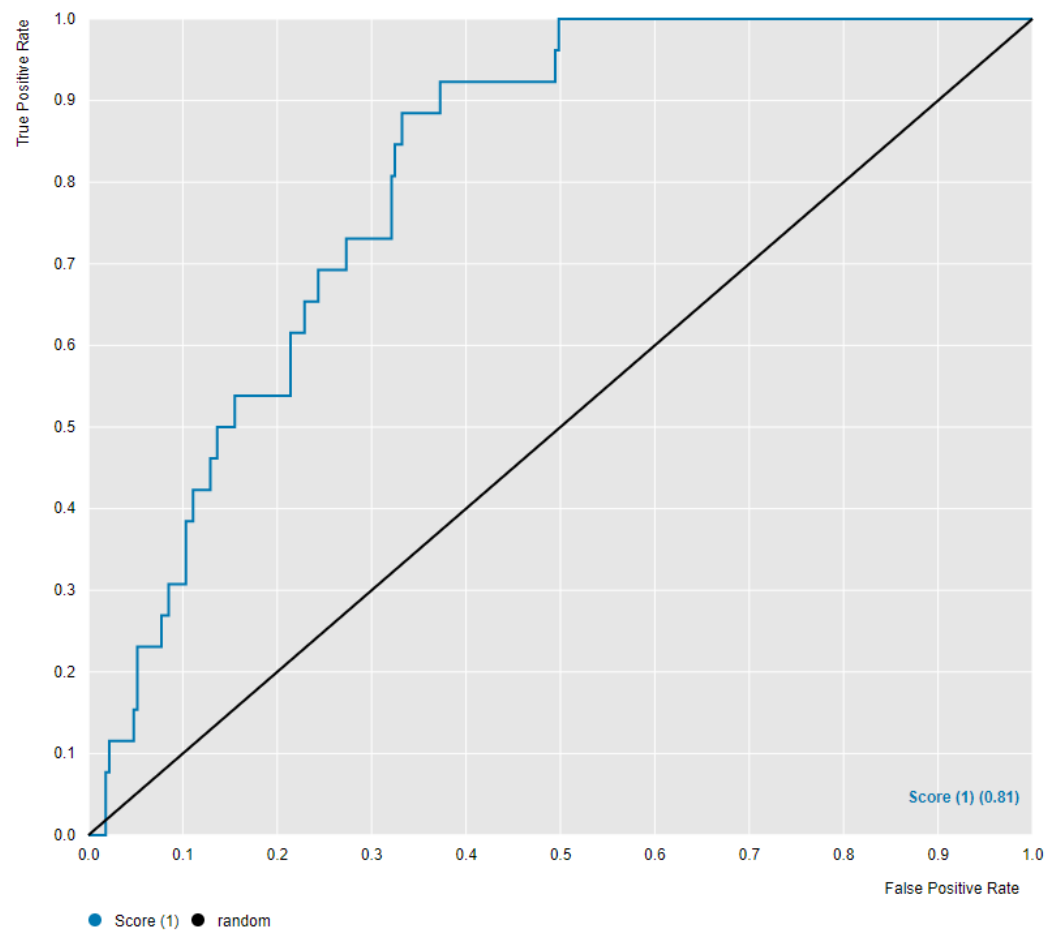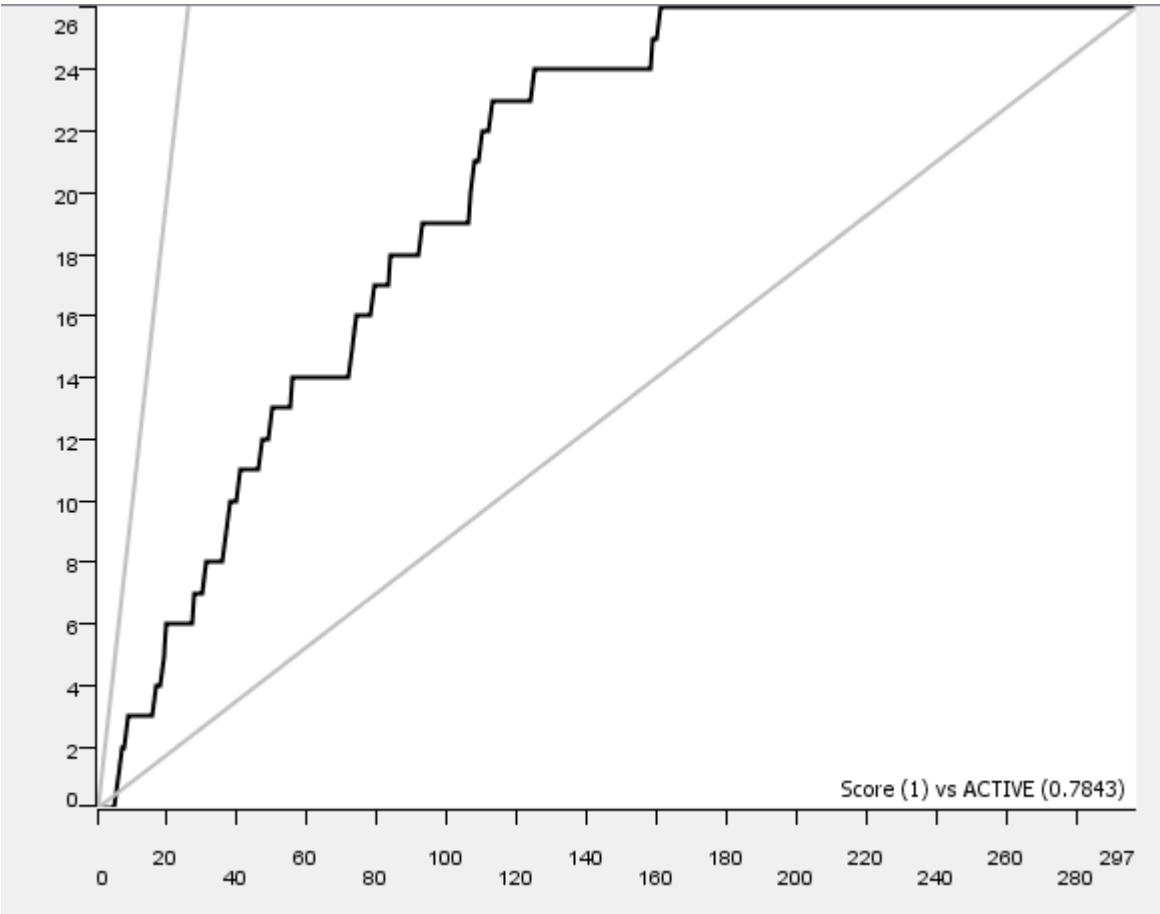

N=297

|                   |        |
|-------------------|--------|
| Top 10% Mean IC50 | 157 nM |
|-------------------|--------|

|          | Predicted Active | Predicted Inactive |
|----------|------------------|--------------------|
| Active   | 16               | 10                 |
| Inactive | 61               | 210                |



# <10 nM DefGood in Aurora B

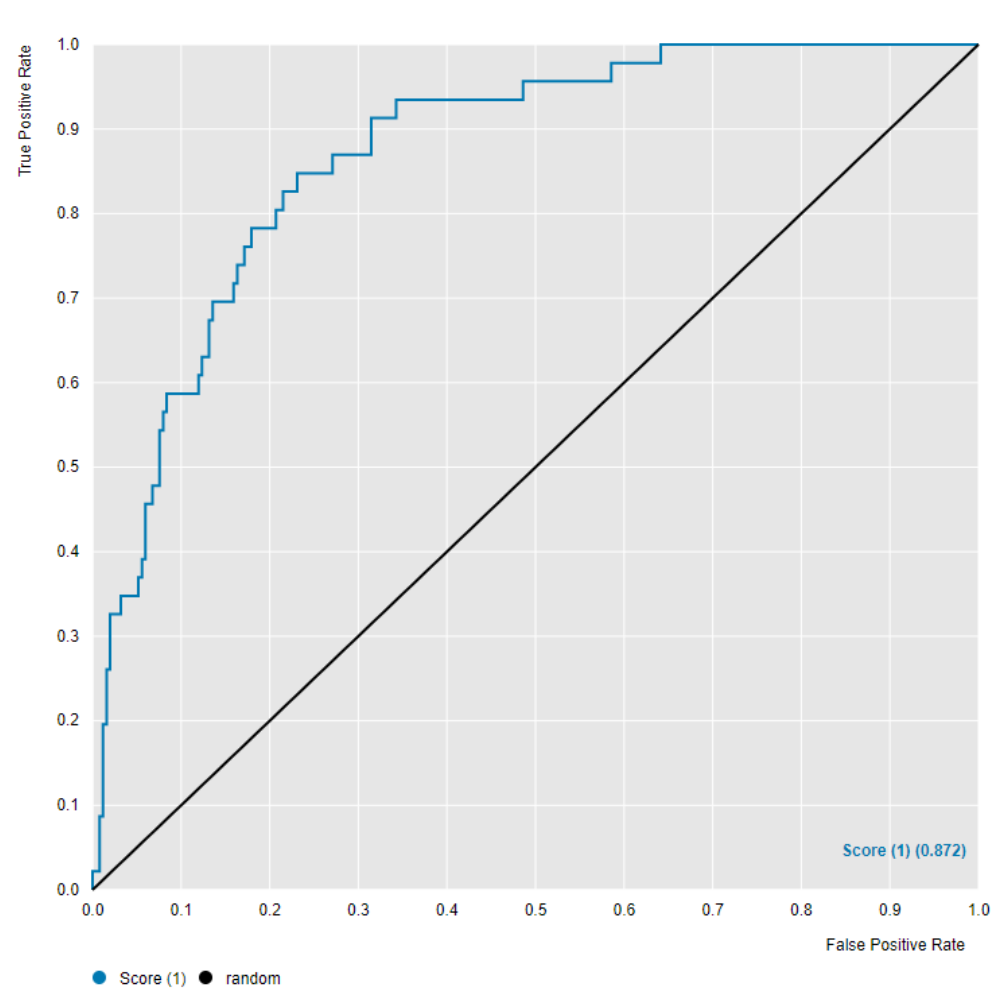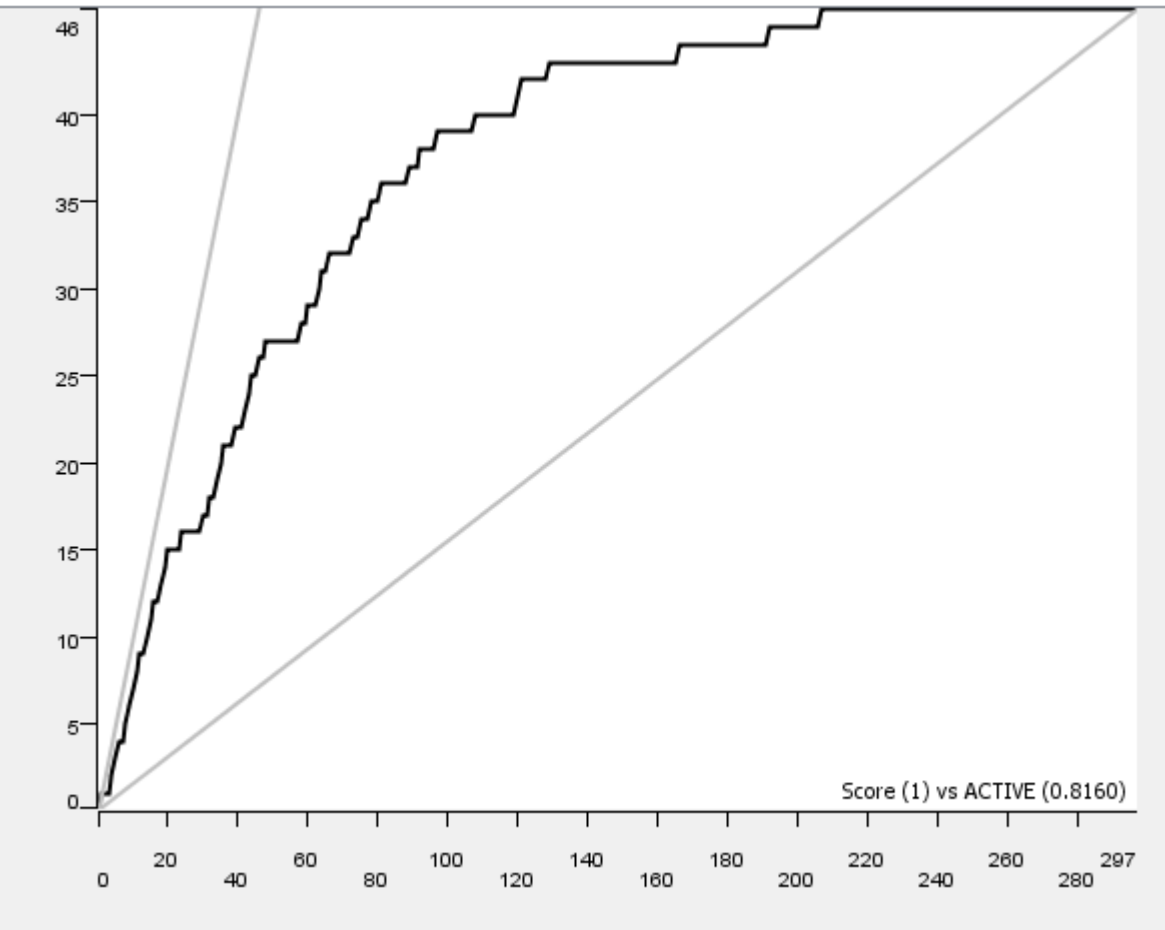

N=297

|                      |         |
|----------------------|---------|
| Top 10% Mean<br>IC50 | 30.6 nM |
|----------------------|---------|

|          | Predicted Active | Predicted Inactive |
|----------|------------------|--------------------|
| Active   | 39               | 7                  |
| Inactive | 64               | 187                |

# <15 nM DefGood in Aurora B

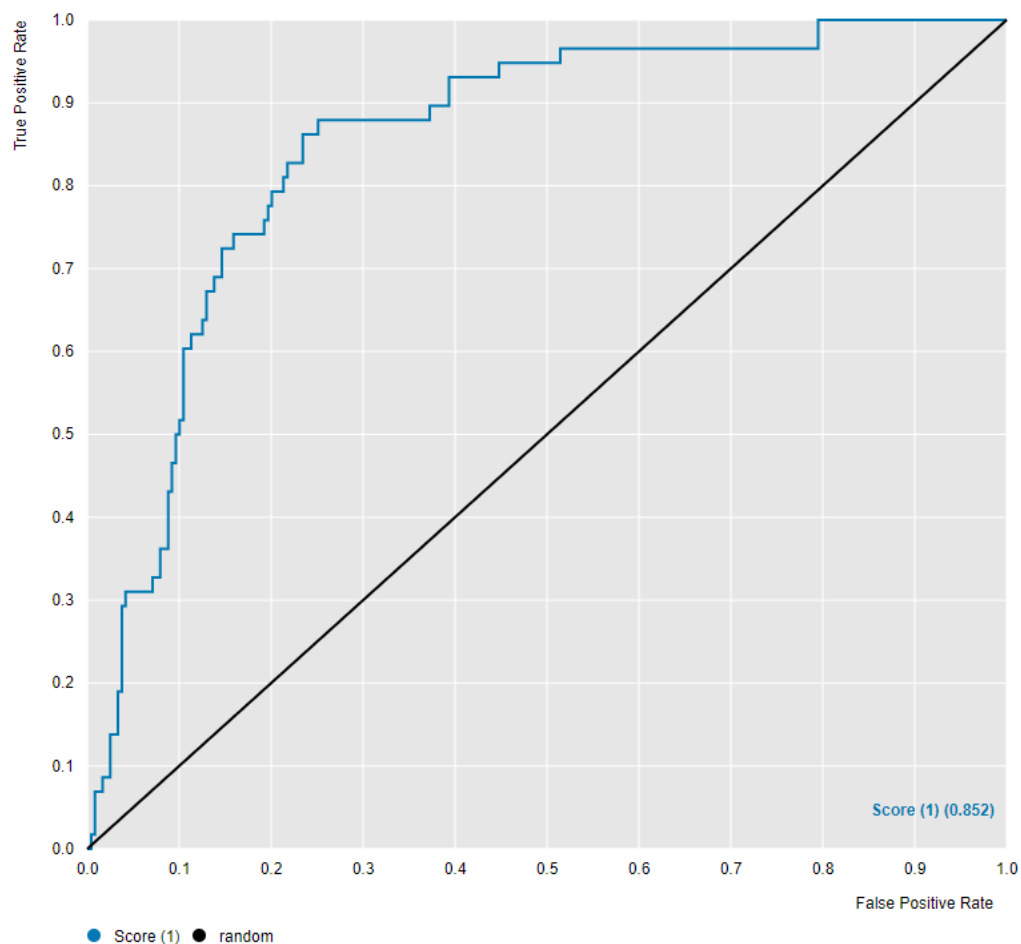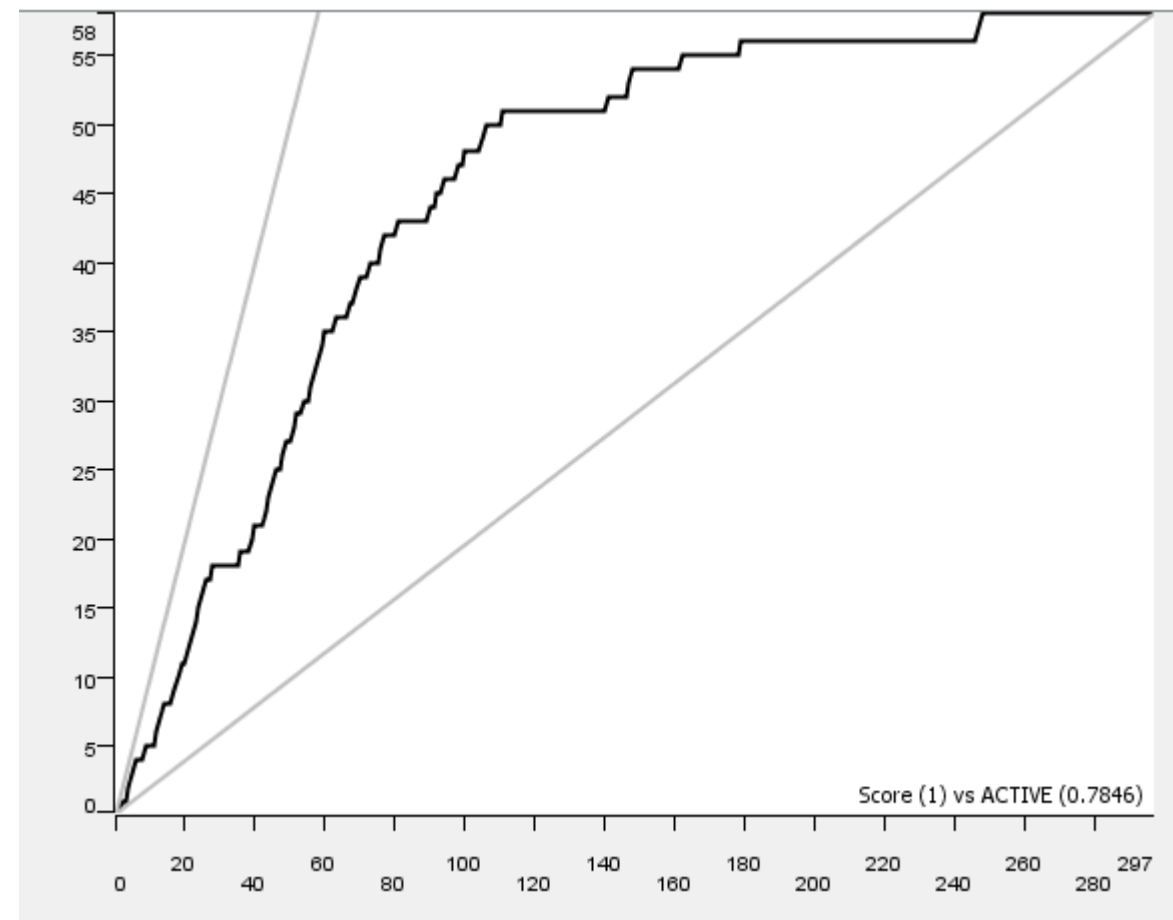

N=297

|                      |         |
|----------------------|---------|
| Top 10% Mean<br>IC50 | 53.1 nM |
|----------------------|---------|

|          | Predicted Active | Predicted Inactive |
|----------|------------------|--------------------|
| Active   | 51               | 7                  |
| Inactive | 66               | 173                |

# <20 nM DefGood in Aurora B

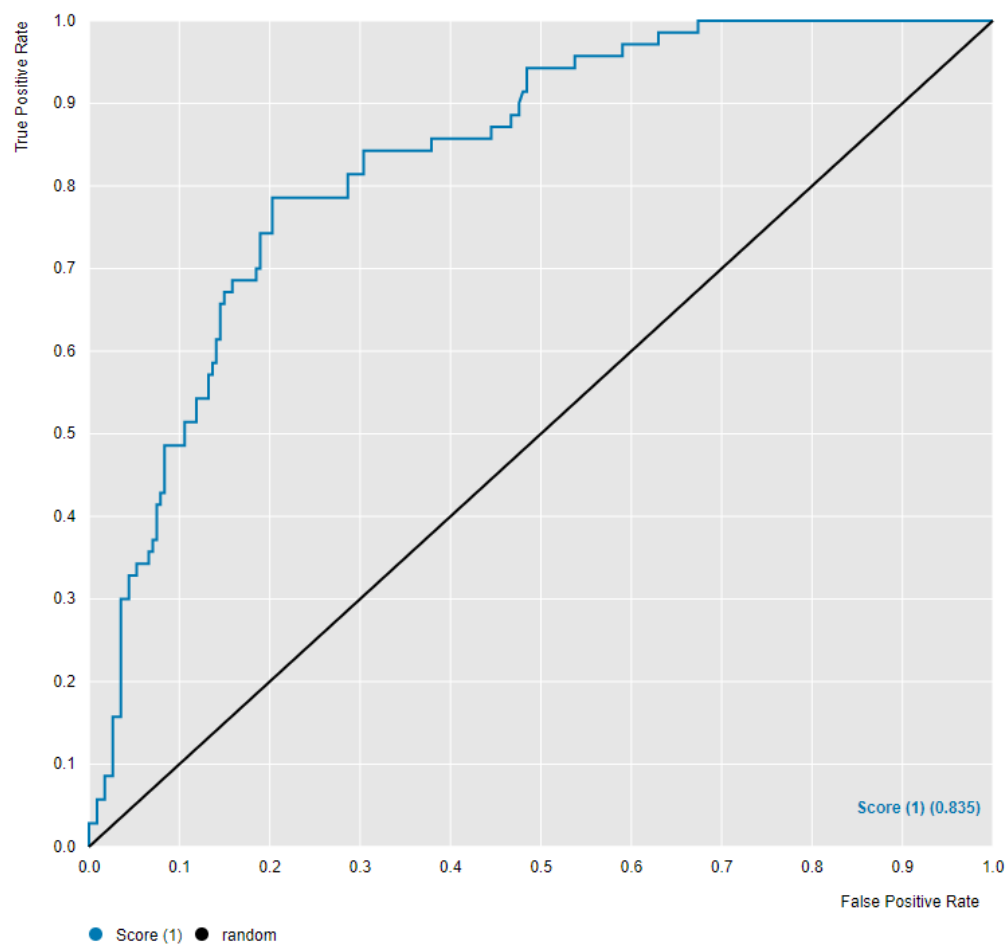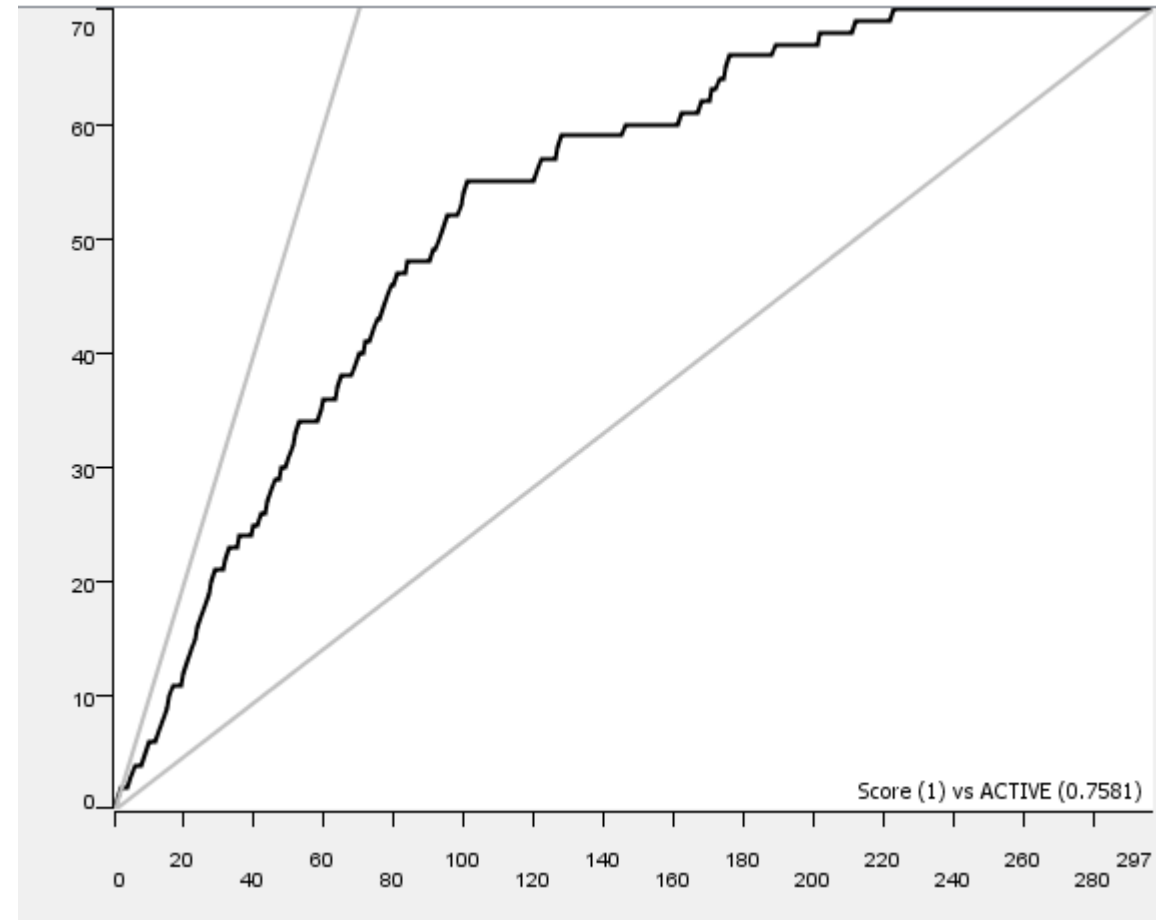

N=297

Top 10% Mean  
IC50

32.4 nM

|          | Predicted Active | Predicted Inactive |
|----------|------------------|--------------------|
| Active   | 52               | 18                 |
| Inactive | 44               | 183                |

# <25 nM DefGood in Aurora B

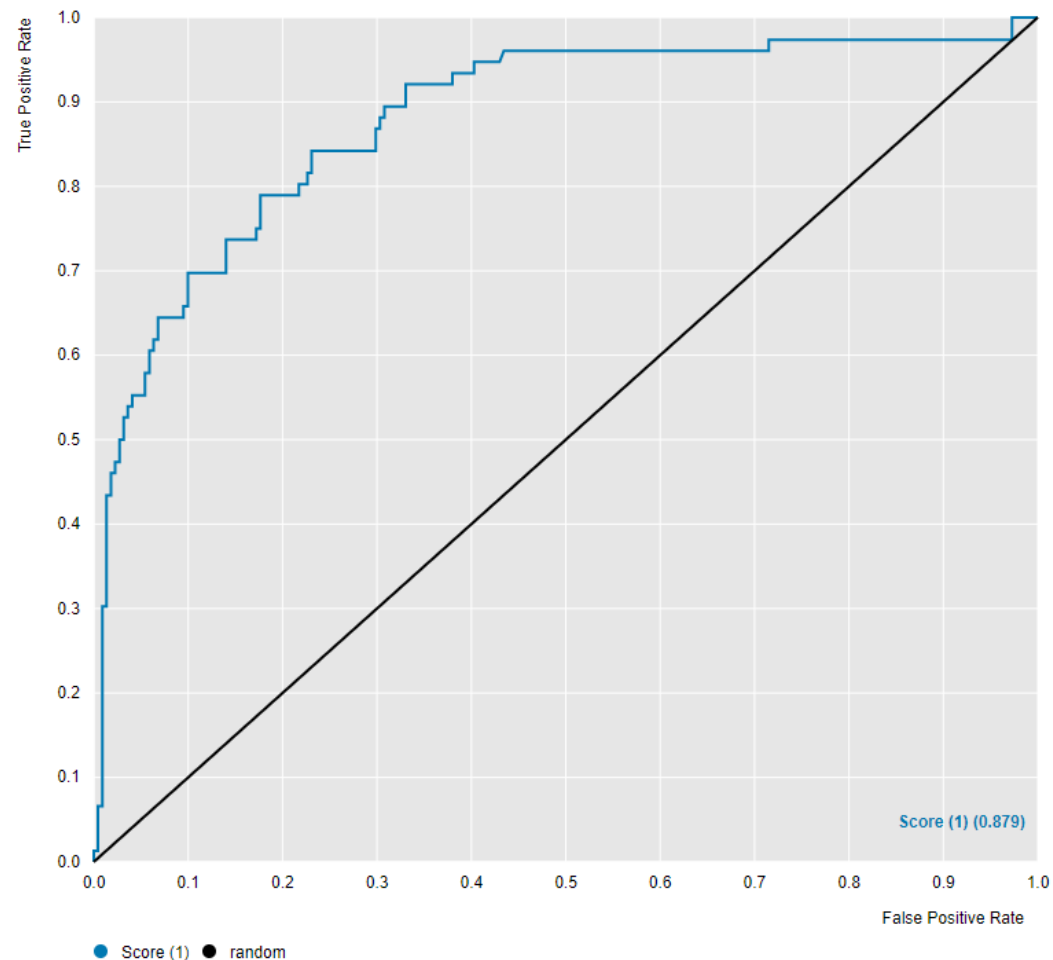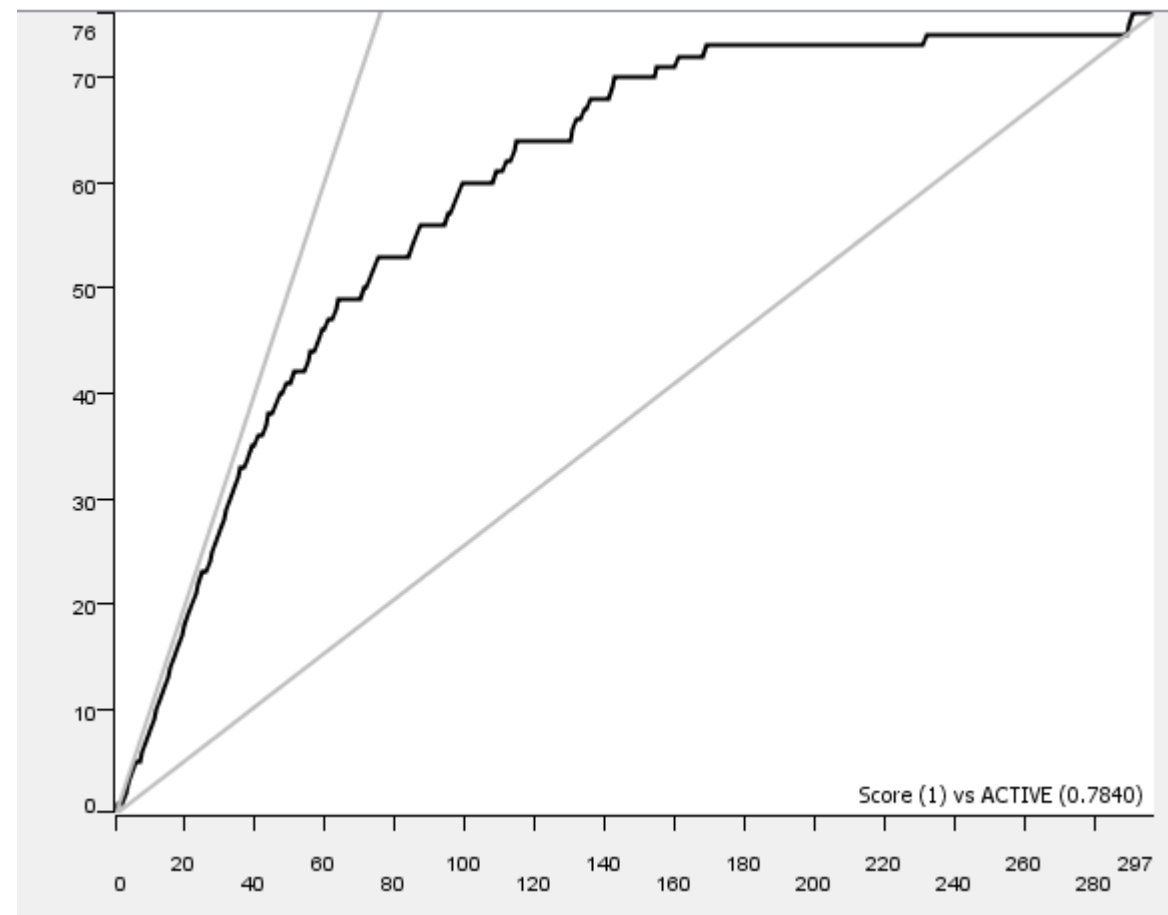

N=297

|                      |        |
|----------------------|--------|
| Top 10% Mean<br>IC50 | 391 nM |
|----------------------|--------|

|          | Predicted Active | Predicted Inactive |
|----------|------------------|--------------------|
| Active   | 60               | 16                 |
| Inactive | 40               | 181                |

# Decision on DefGood

- <10 nM has the best performance with regard to enrichment and mean top 10% IC50.

# RF - <10 nM DefGood in Aurora B

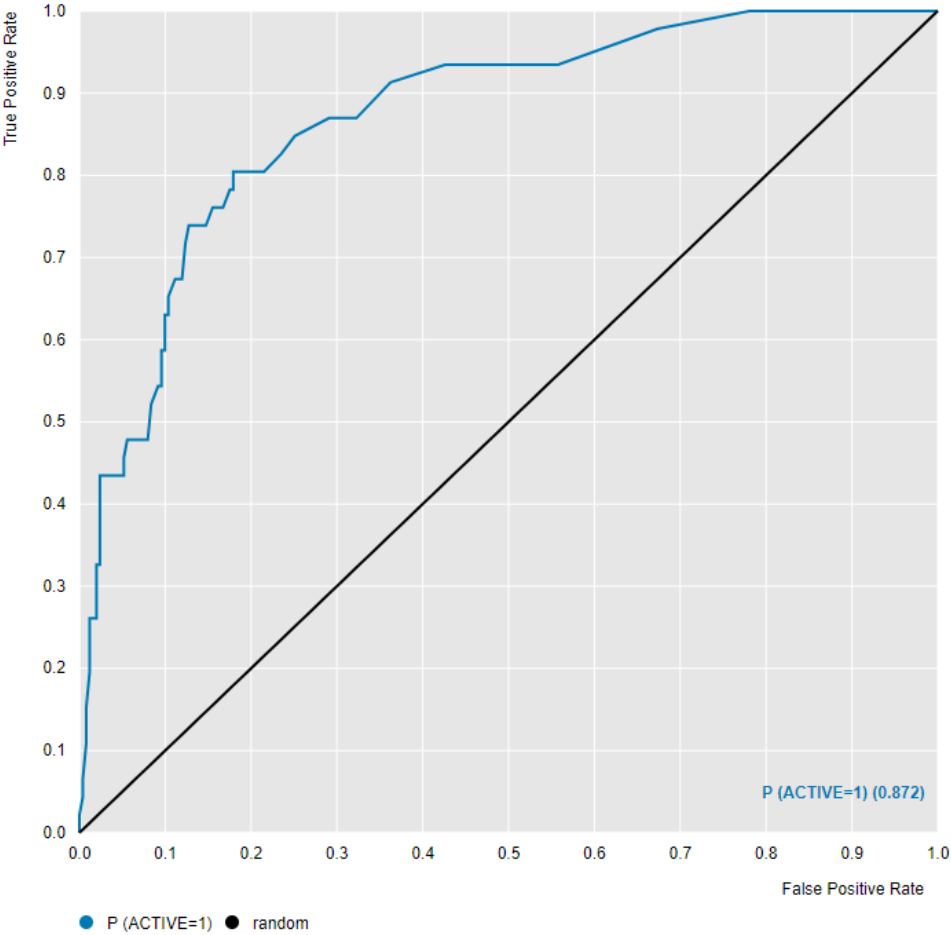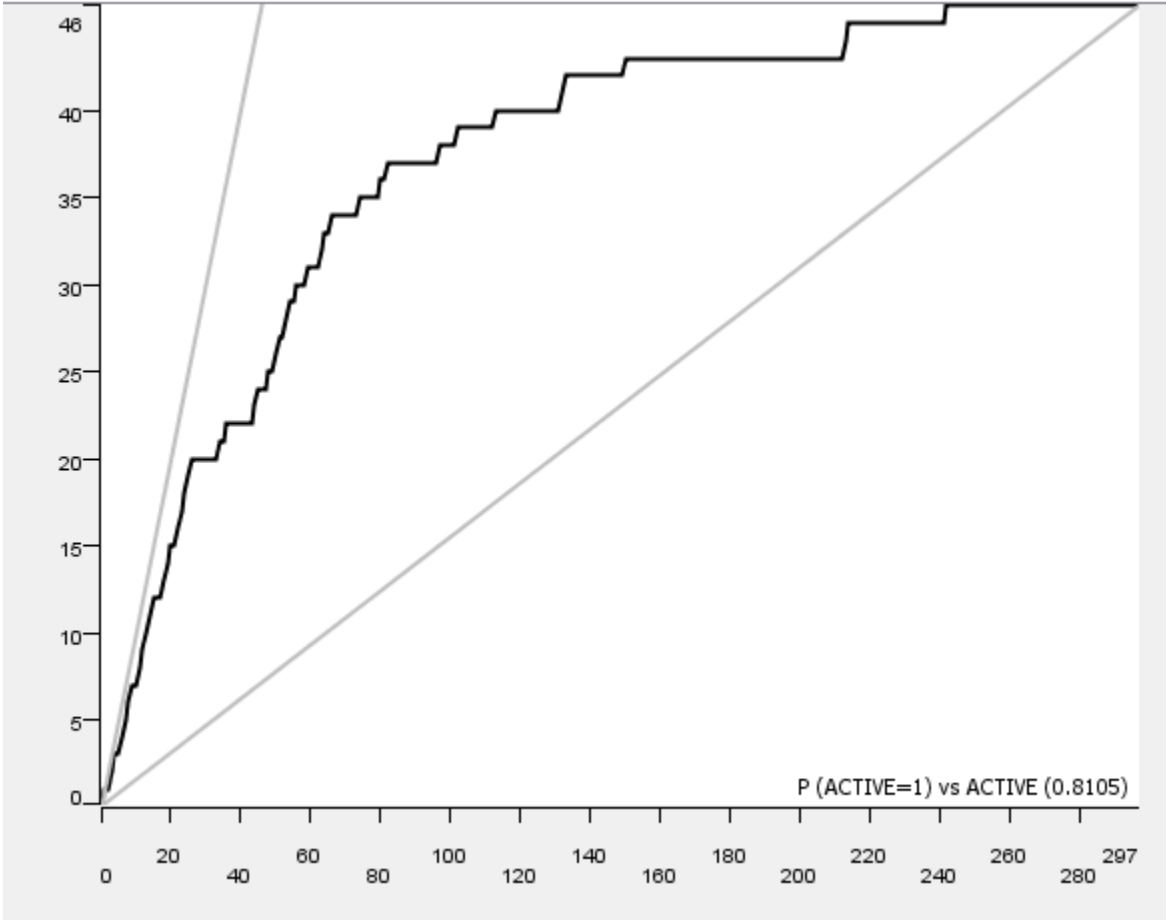

N=297

|                      |         |
|----------------------|---------|
| Top 10% Mean<br>IC50 | 32.6 nM |
|----------------------|---------|

|          | Predicted Active | Predicted Inactive |
|----------|------------------|--------------------|
| Active   | 20               | 26                 |
| Inactive | 9                | 242                |

# Decision on DefGood - RF

- Work in ALK showed DefGood in the NBN was similar to DefGood in an RF. Therefore, this value for DefGood from the NBN design was used as DefGood.

# PNN - <10 nM DefGood in Aurora B

- Properties List (46 calculatable properties were used)
- Parameterization (Global Accuracy for Activity at a 10 nM decision value was used, and a 5-fold stratified sampling cross validation was used to parameterize theta minus and theta plus) Theta Minus = 0.05 and Theta Plus = 0.45



# PNN - <10 nM DefGood in Aurora B

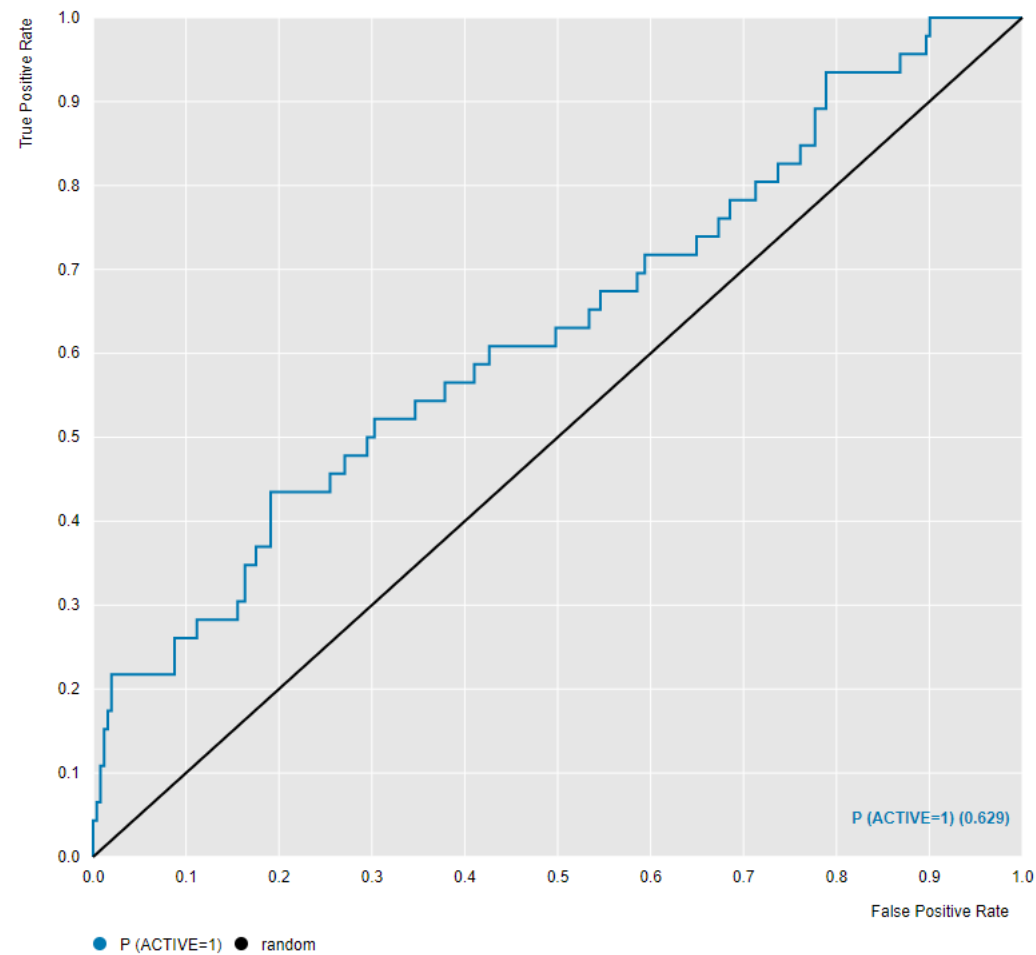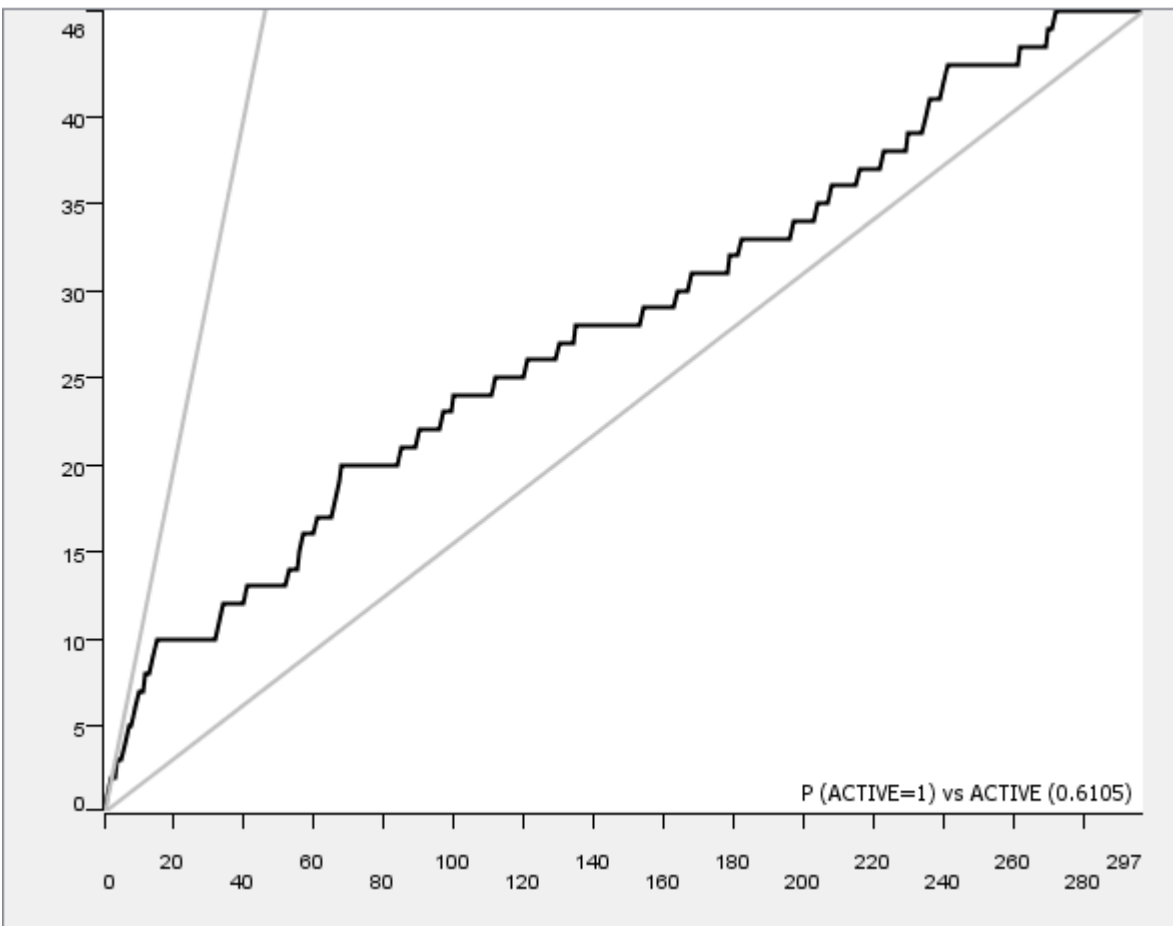

N=297

|                   |          |
|-------------------|----------|
| Top 10% Mean IC50 | 5,900 nM |
|-------------------|----------|

|          | Predicted Active | Predicted Inactive |
|----------|------------------|--------------------|
| Active   | 3                | 43                 |
| Inactive | 1                | 250                |

# PNN - <20 nM DefGood in Aurora B

- Initial DefGood failed to generate a useful model. Therefore, 20 nM was evaluated as the decision value
- Properties List (46 calculatable properties were used)
- Parameterization (Global Accuracy for Activity at a 20 nM decision value was used, and a 5-fold stratified sampling cross validation was used to parameterize theta minus and theta plus) Theta Minus = 0.05 and Theta Plus = 0.65

# PNN - <20 nM DefGood in Aurora B

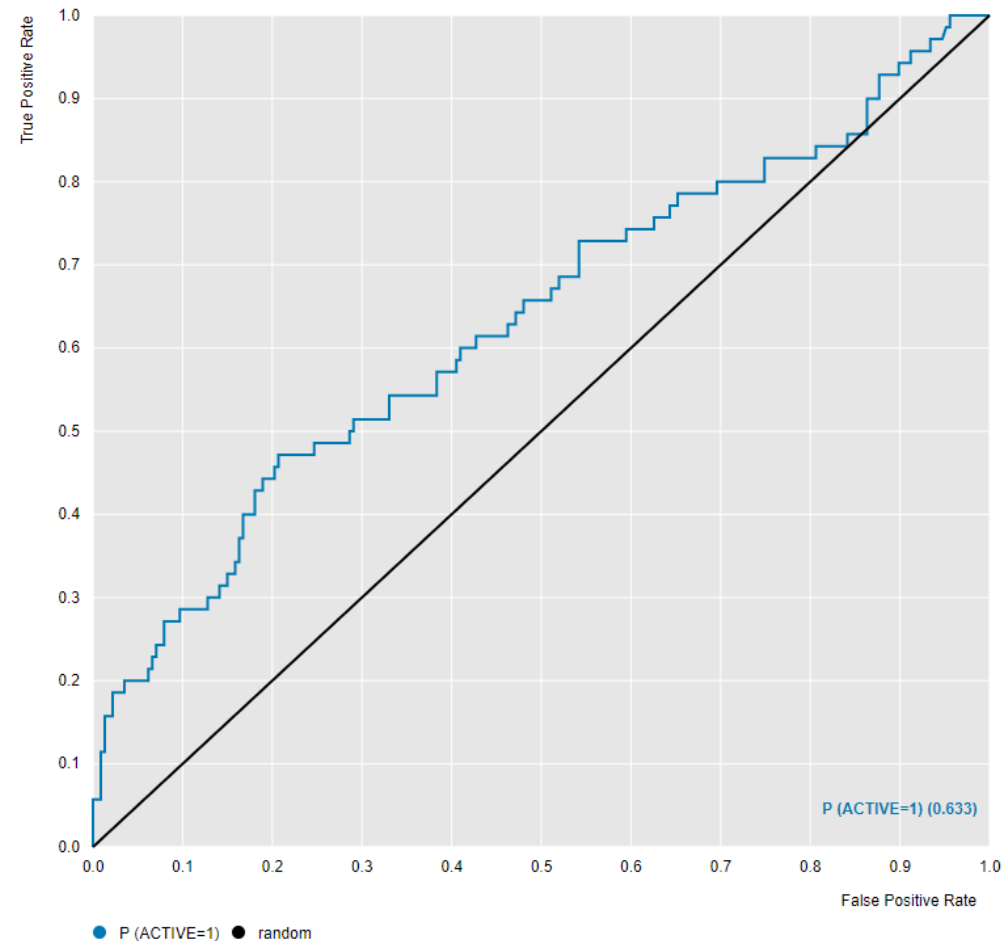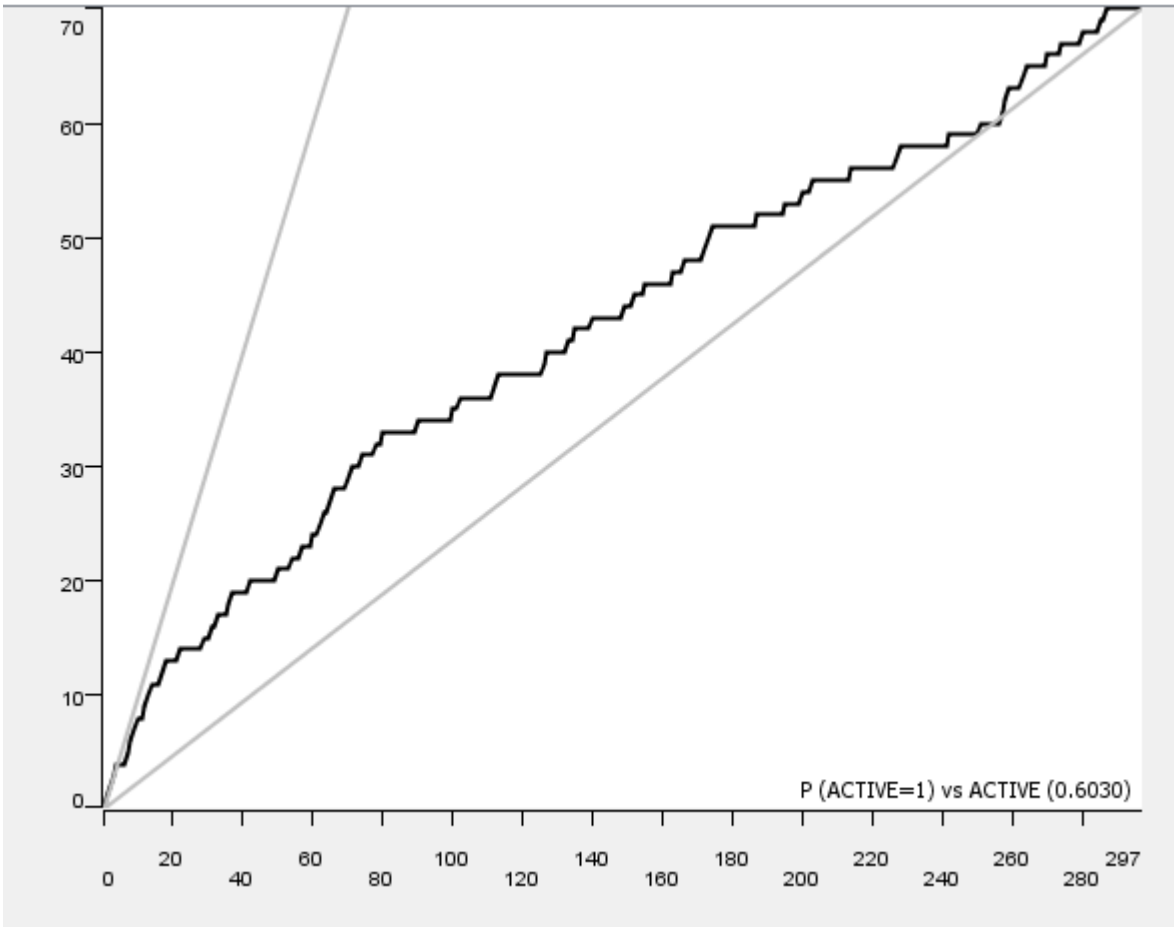

N=297

|                   |          |
|-------------------|----------|
| Top 10% Mean IC50 | 2,300 nM |
|-------------------|----------|

|          | Predicted Active | Predicted Inactive |
|----------|------------------|--------------------|
| Active   | 4                | 66                 |
| Inactive | 0                | 227                |

# Decision on DefGood - PNN

- The PNN failed to generate a useful predictive algorithm with a definition of good at  $<10$  nM or at  $<20$  nM
- A PNN will not be used for aroura B kinase

# NBN Error Tolerance- <10 nM DefGood in Aurora B

- 0-50% absolute error

<10 nM DefGood in aurora B, 5% error;  
Random seed = 1515533876005

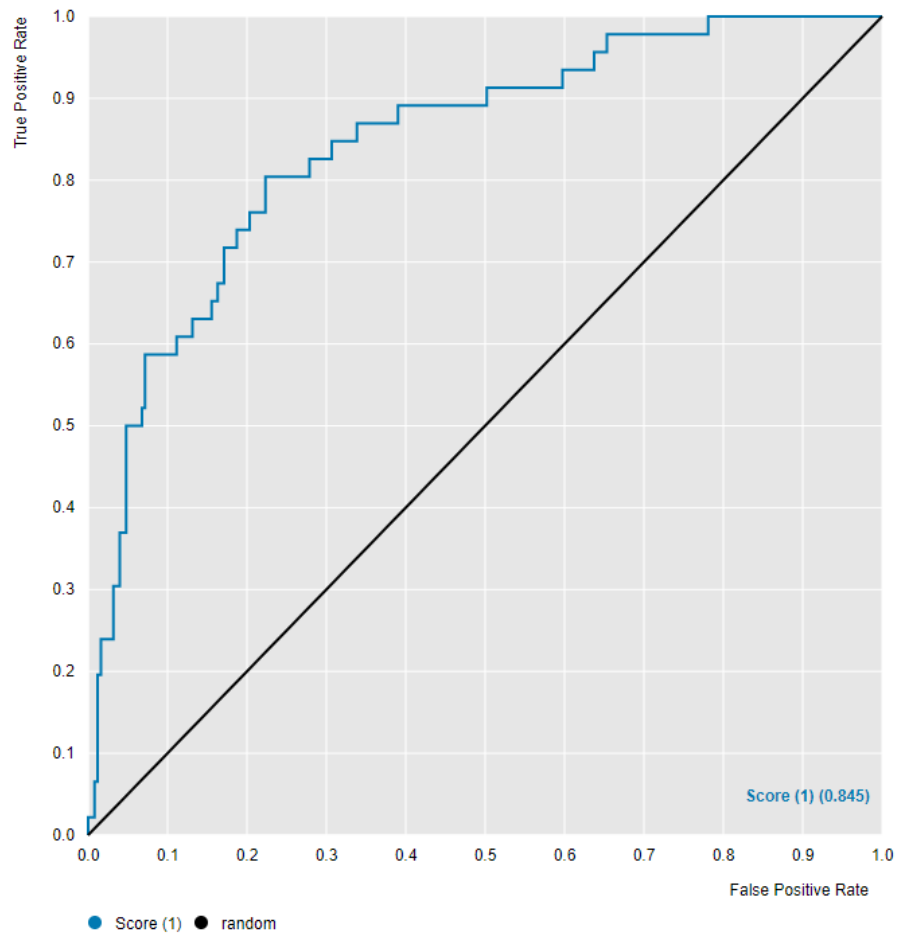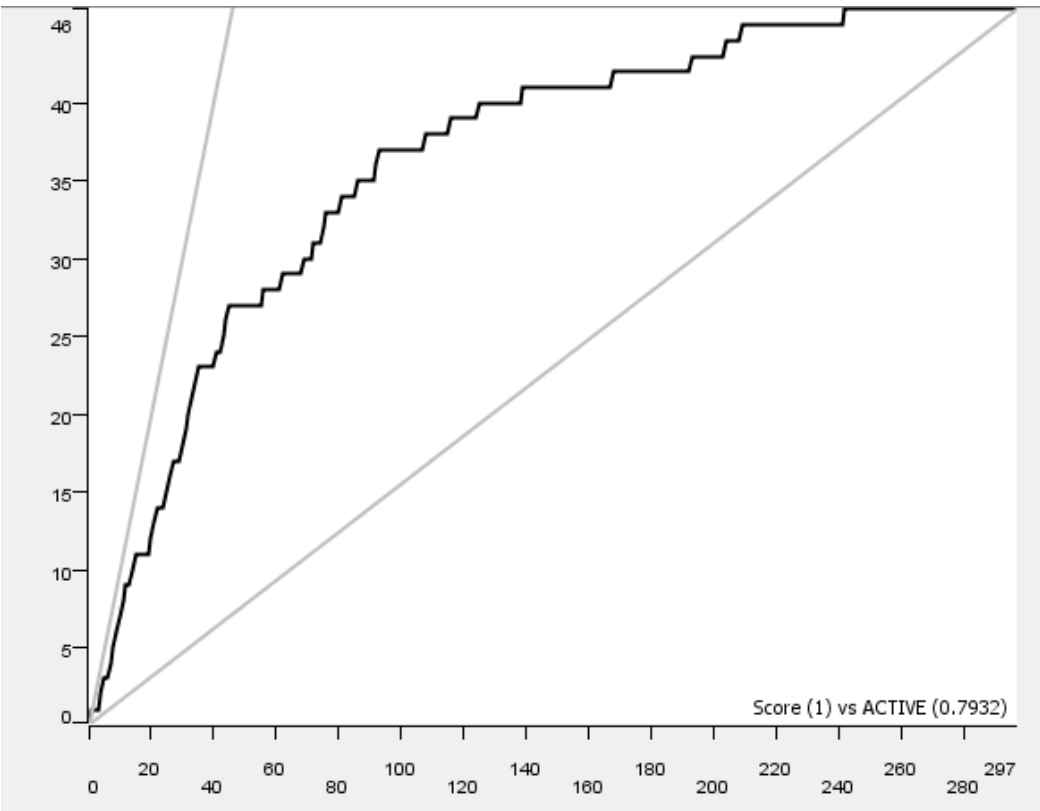

N=297

|                   |                                              |
|-------------------|----------------------------------------------|
| Top 10% Mean IC50 | 405 nM<br>(one micromolar and one >10000 nM) |
|-------------------|----------------------------------------------|

|          | Predicted Active | Predicted Inactive |
|----------|------------------|--------------------|
| Active   | 37               | 9                  |
| Inactive | 63               | 188                |

# <10nM DefGood in aurora B, 10% error

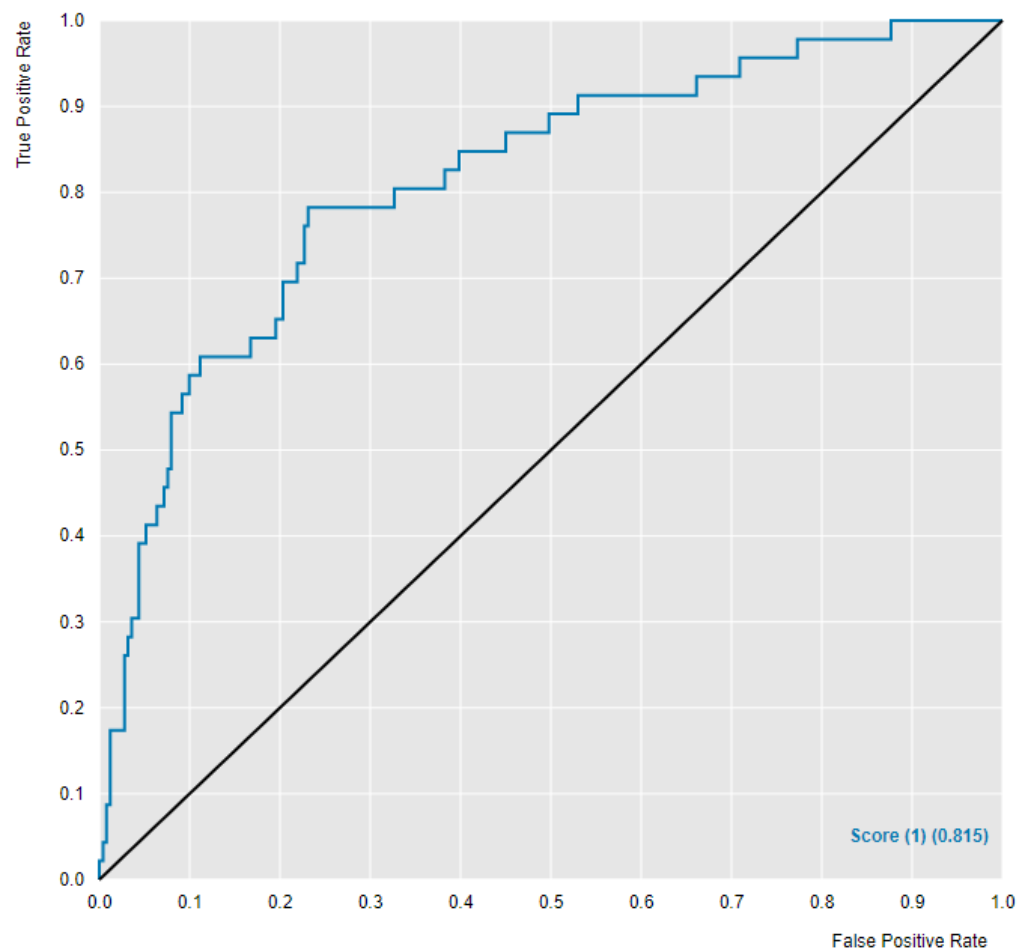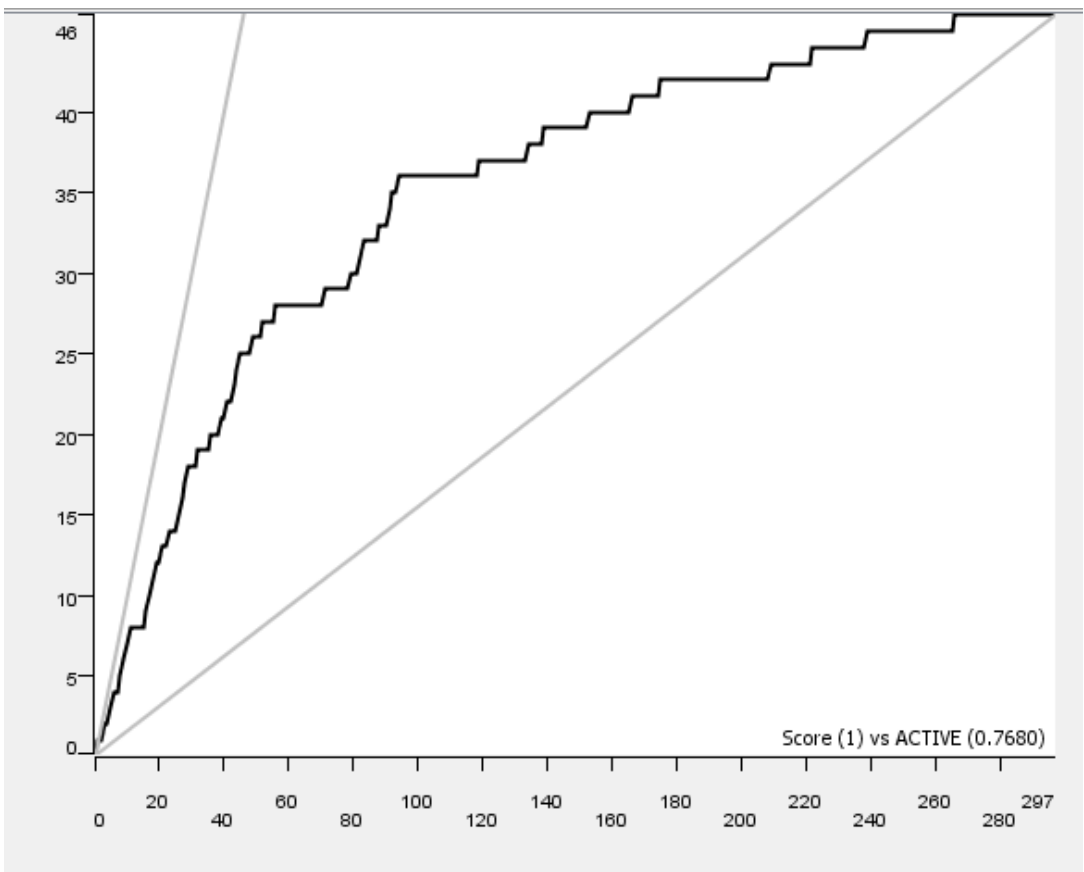

N=297

● Score (1) ● random

|                   |                                              |
|-------------------|----------------------------------------------|
| Top 10% Mean IC50 | 403 nM<br>(one micromolar and one >10000 nM) |
|-------------------|----------------------------------------------|

|          | Predicted Active | Predicted Inactive |
|----------|------------------|--------------------|
| Active   | 28               | 18                 |
| Inactive | 41               | 210                |

# <10nM DefGood in aurora B, 15% error

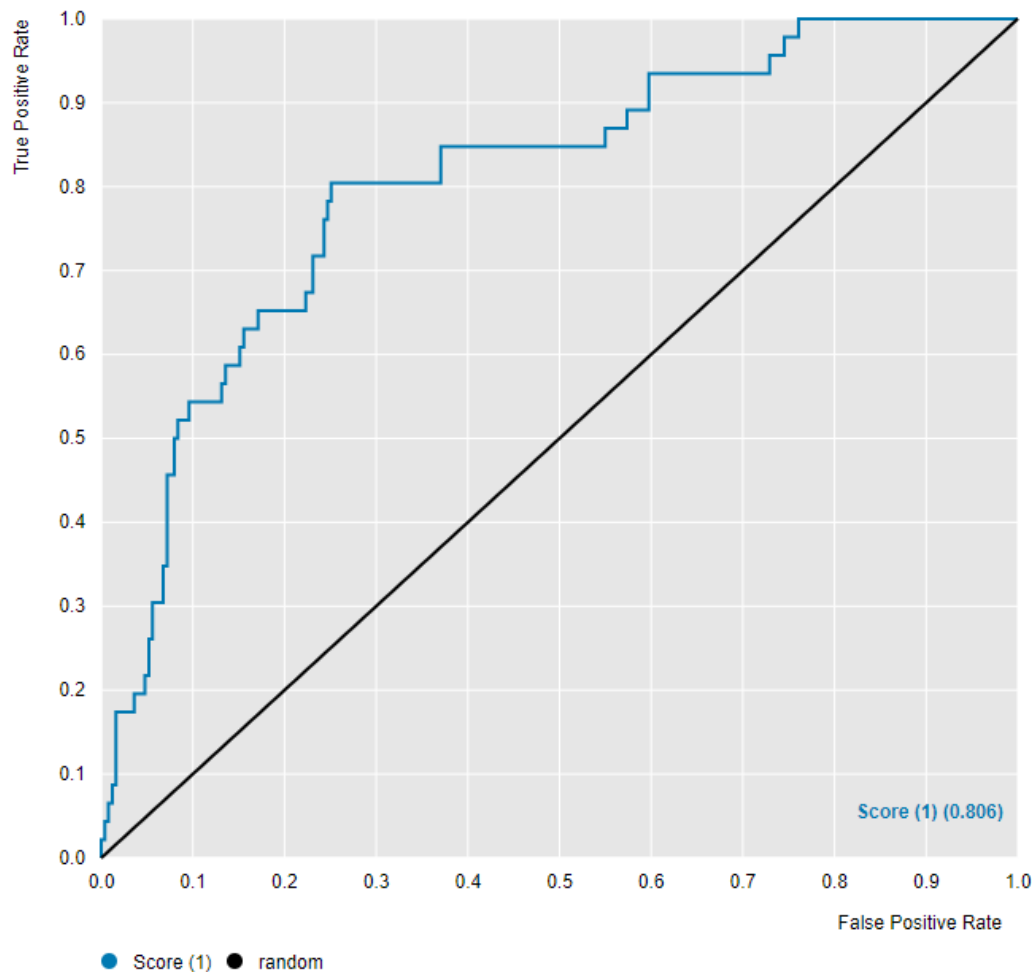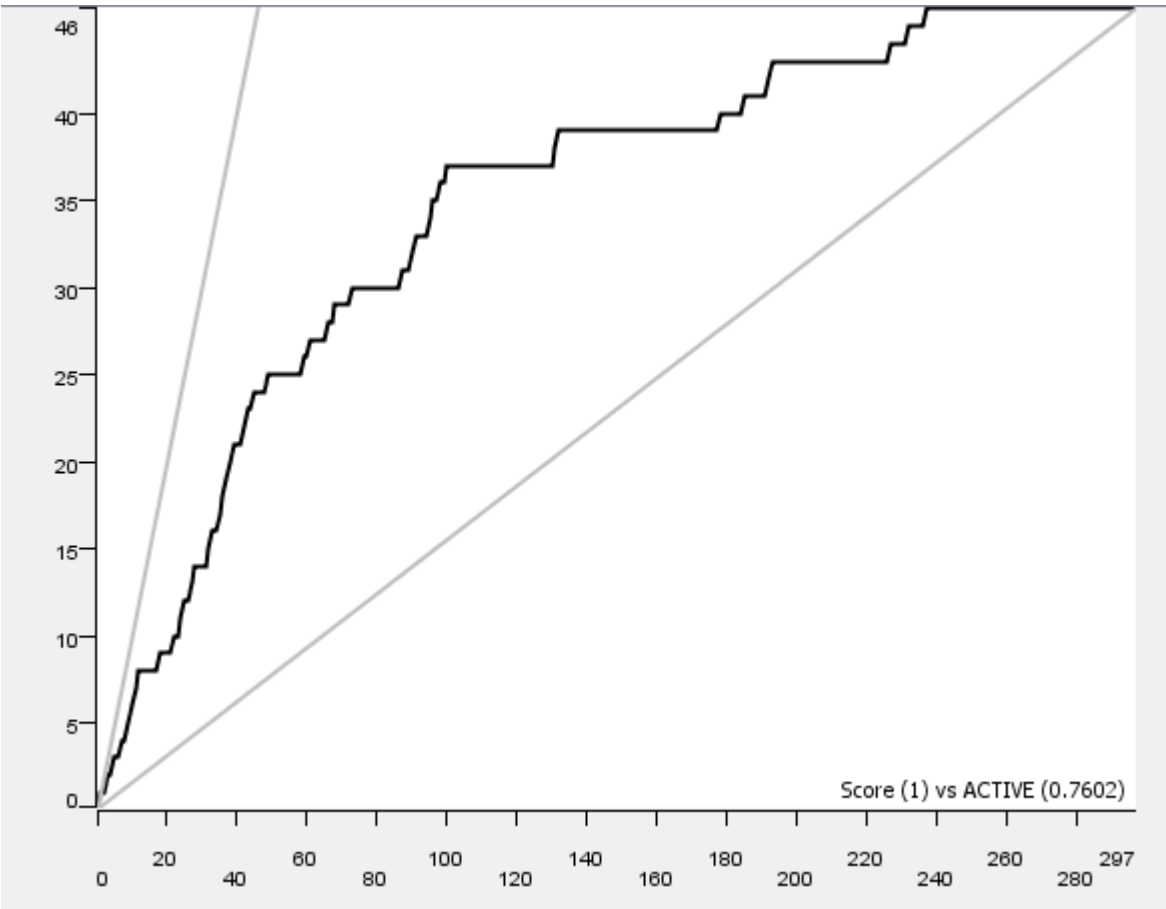

N=297

|                   |        |
|-------------------|--------|
| Top 10% Mean IC50 | 426 nM |
|-------------------|--------|

|          | Predicted Active | Predicted Inactive |
|----------|------------------|--------------------|
| Active   | 26               | 20                 |
| Inactive | 33               | 218                |



# <10nM DefGood in aurora B, 20% error

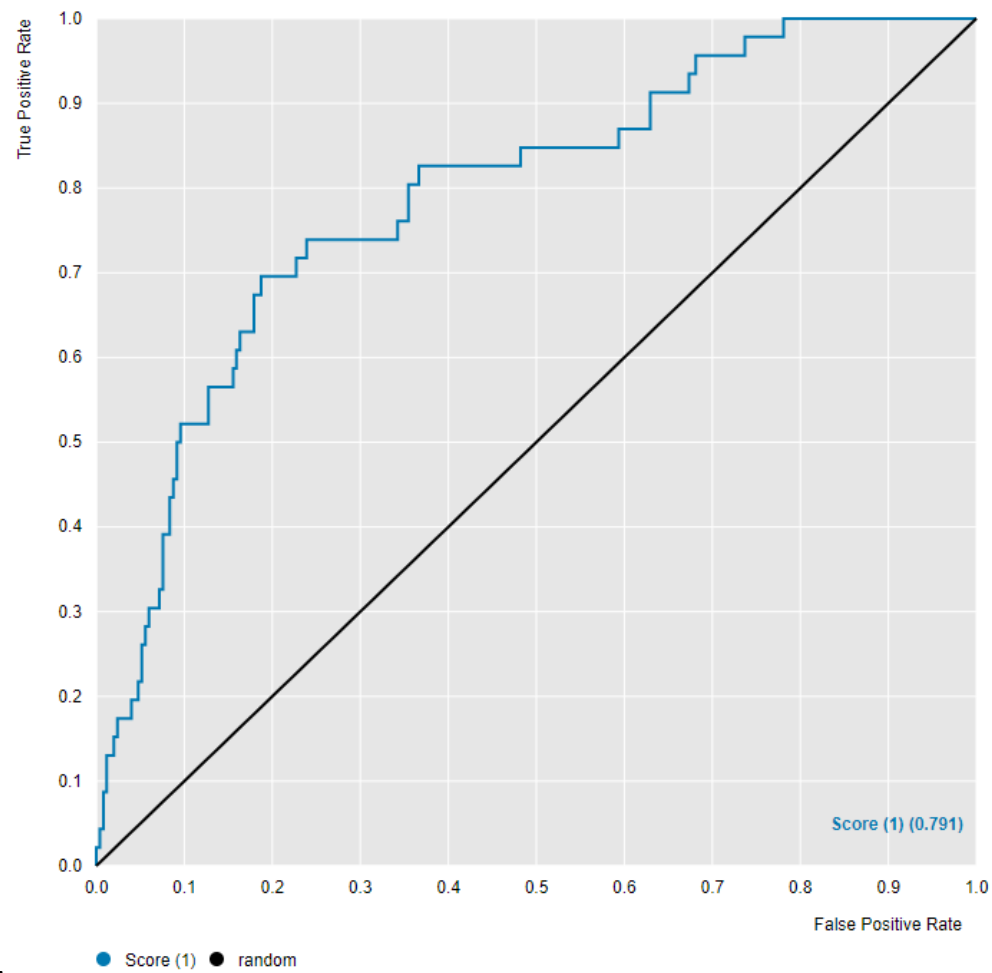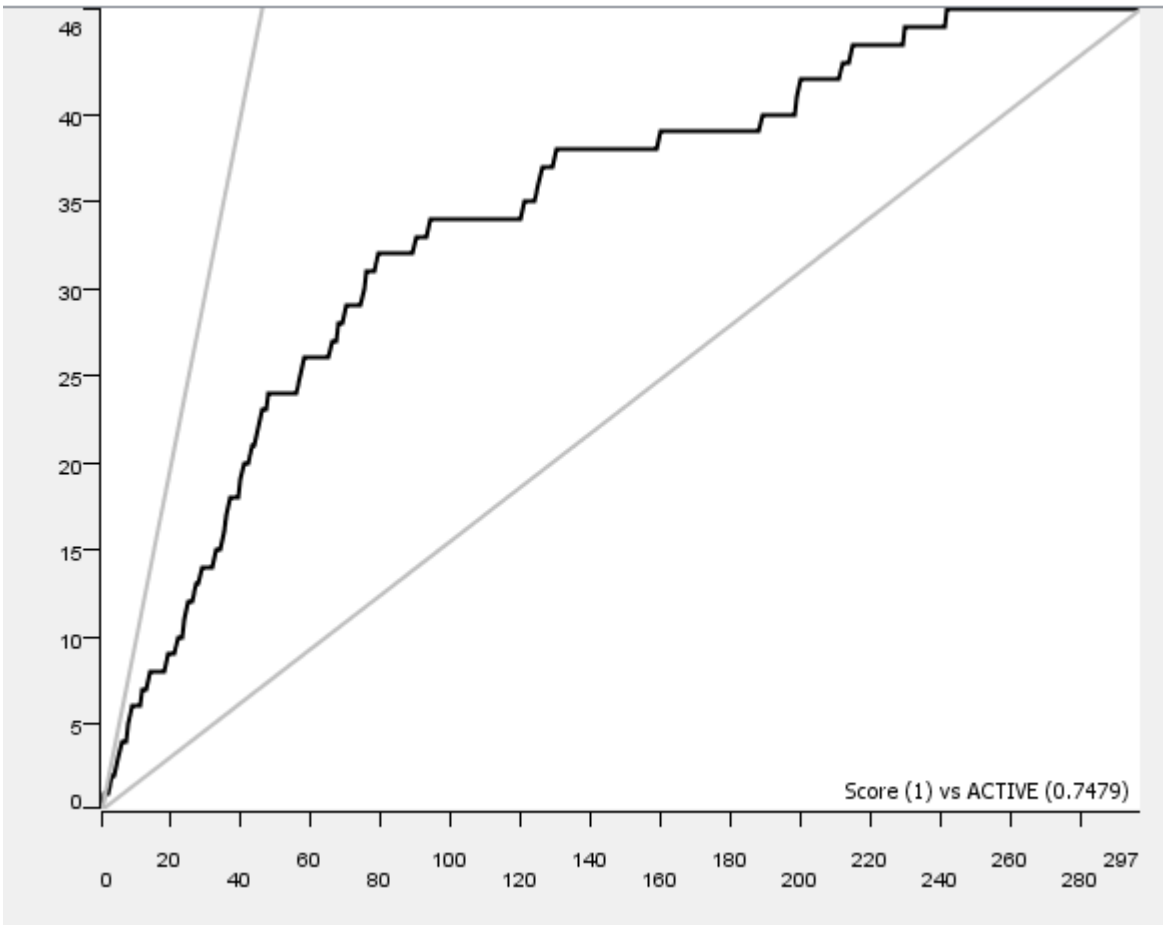

N=297

|                   |        |
|-------------------|--------|
| Top 10% Mean IC50 | 427 nM |
|-------------------|--------|

|          | Predicted Active | Predicted Inactive |
|----------|------------------|--------------------|
| Active   | 33               | 13                 |
| Inactive | 57               | 194                |

# <10nM DefGood in aurora B, 25% error

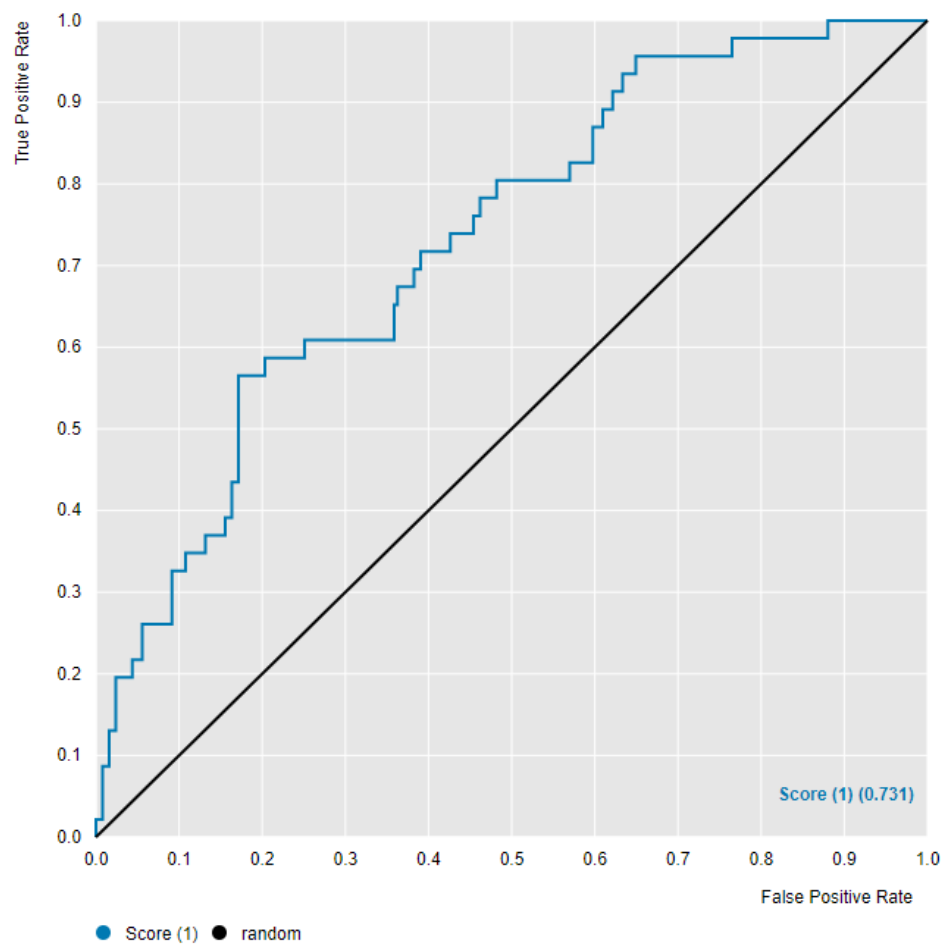

N=297

|                   |        |
|-------------------|--------|
| Top 10% Mean IC50 | 435 nM |
|-------------------|--------|

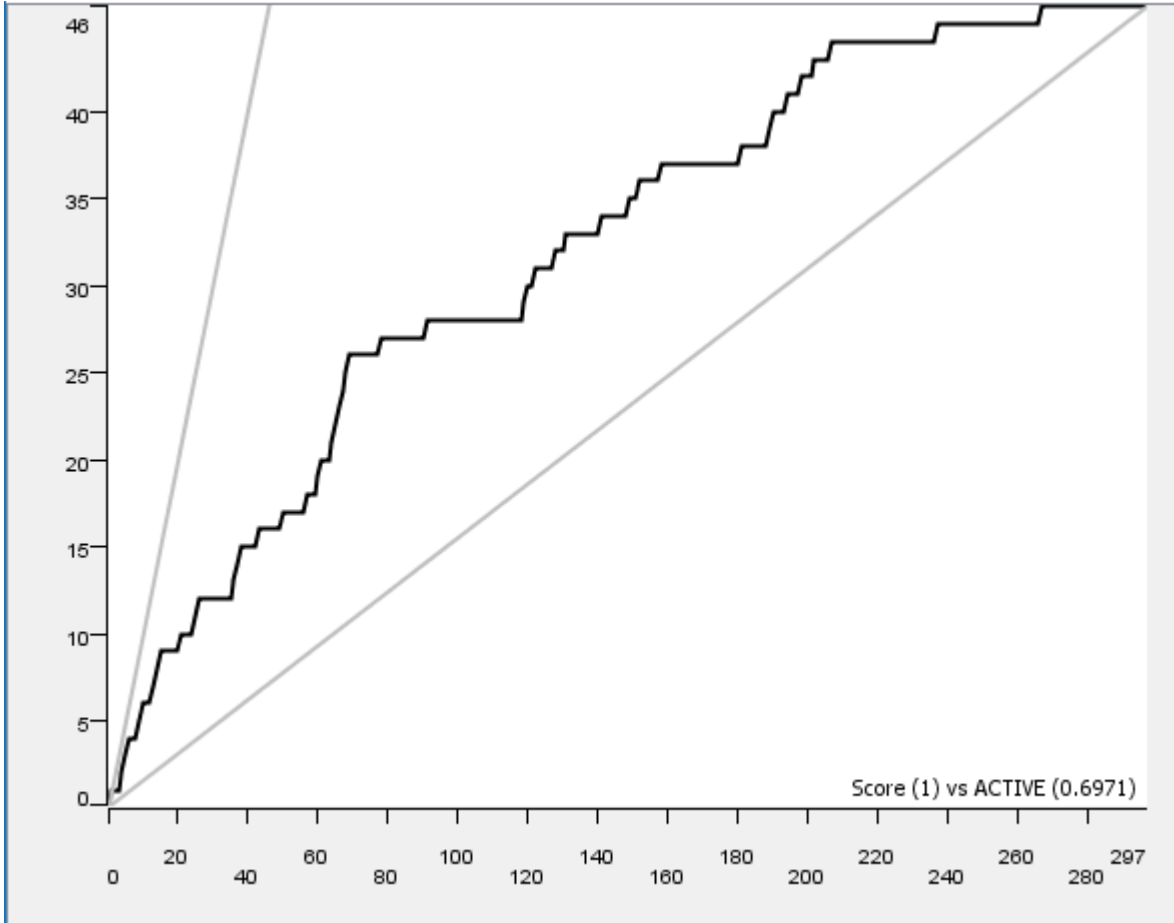

|          | Predicted Active | Predicted Inactive |
|----------|------------------|--------------------|
| Active   | 28               | 18                 |
| Inactive | 80               | 171                |

# <10nM DefGood in aurora B, 30% error

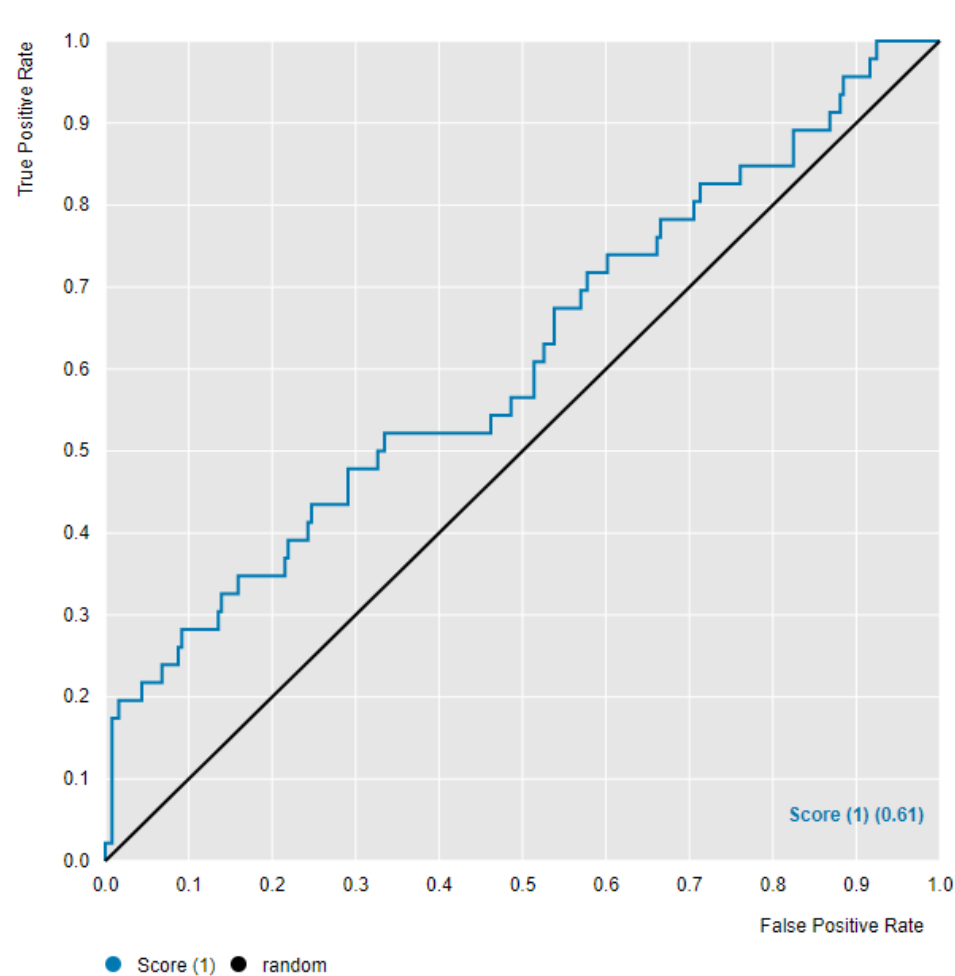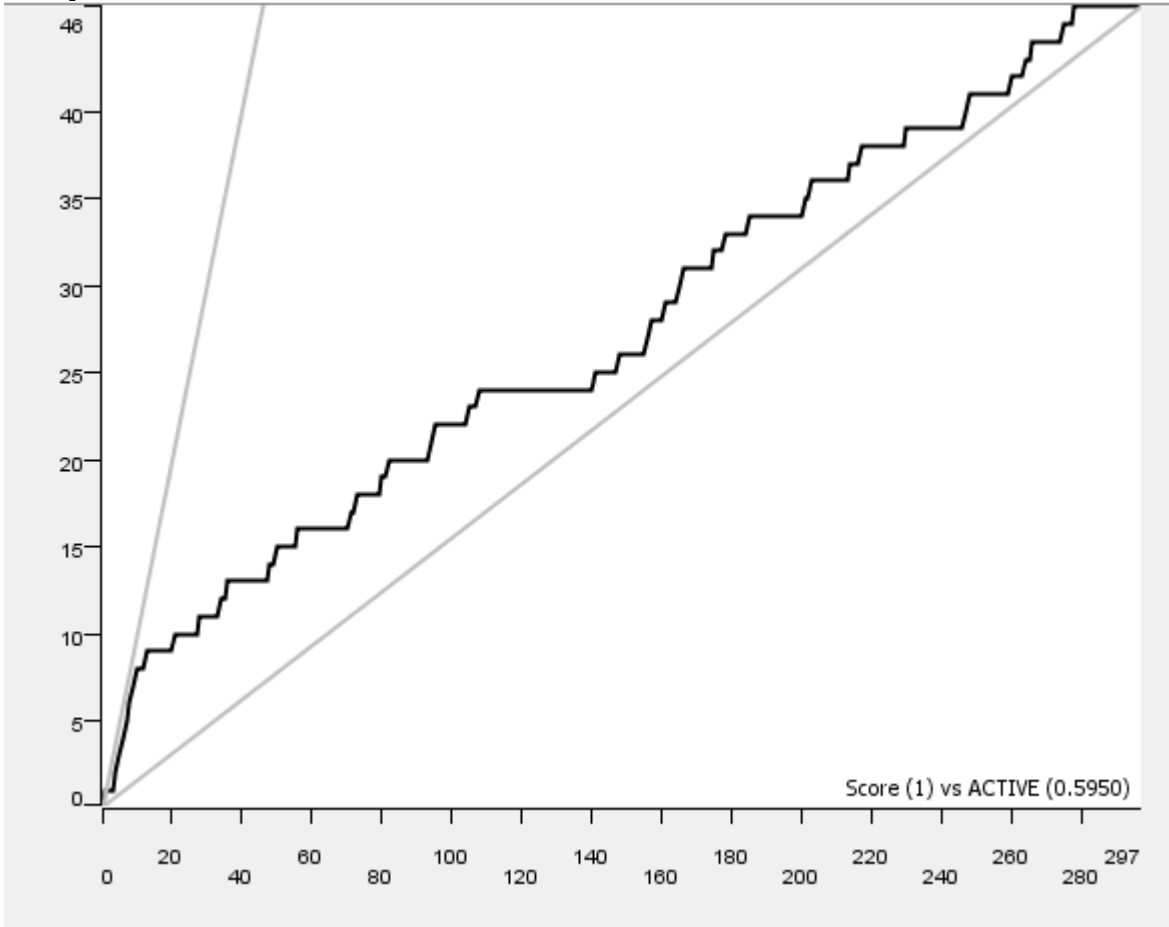

N=297

|                   |        |
|-------------------|--------|
| Top 10% Mean IC50 | 925 nM |
|-------------------|--------|

|          | Predicted Active | Predicted Inactive |
|----------|------------------|--------------------|
| Active   | 24               | 22                 |
| Inactive | 98               | 153                |

<10nM DefGood in aurora B, 10% error;  
Random seed = 429

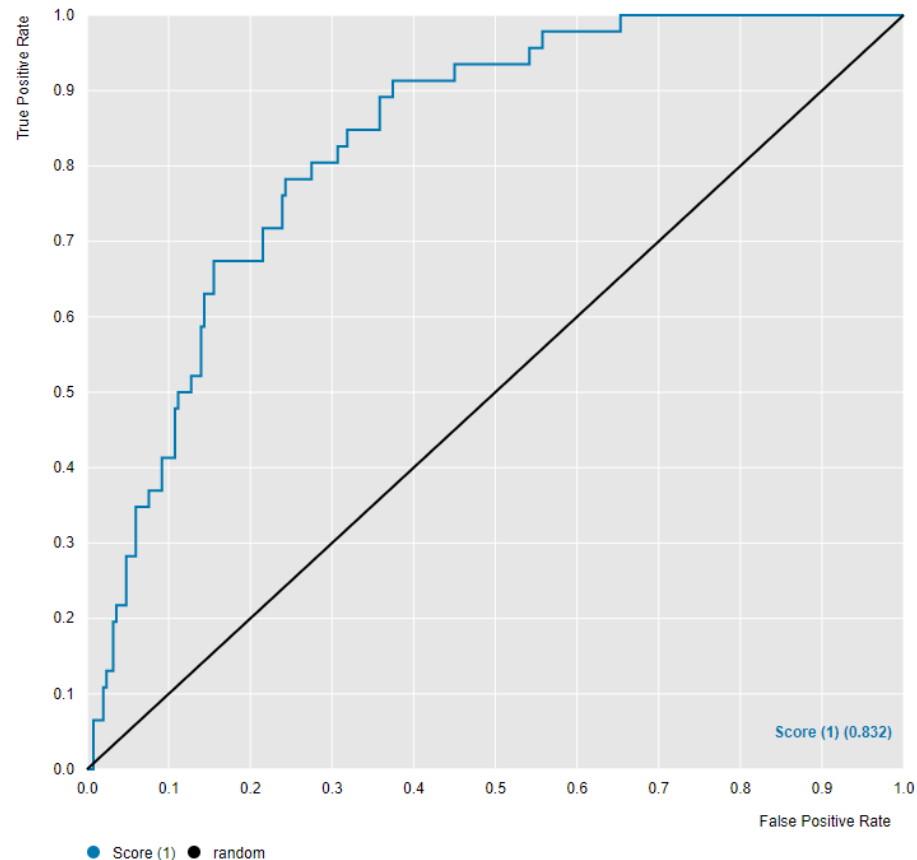

N=297

Top 10% Mean  
IC50

385 nM  
(one > 10,000  
nM compound)

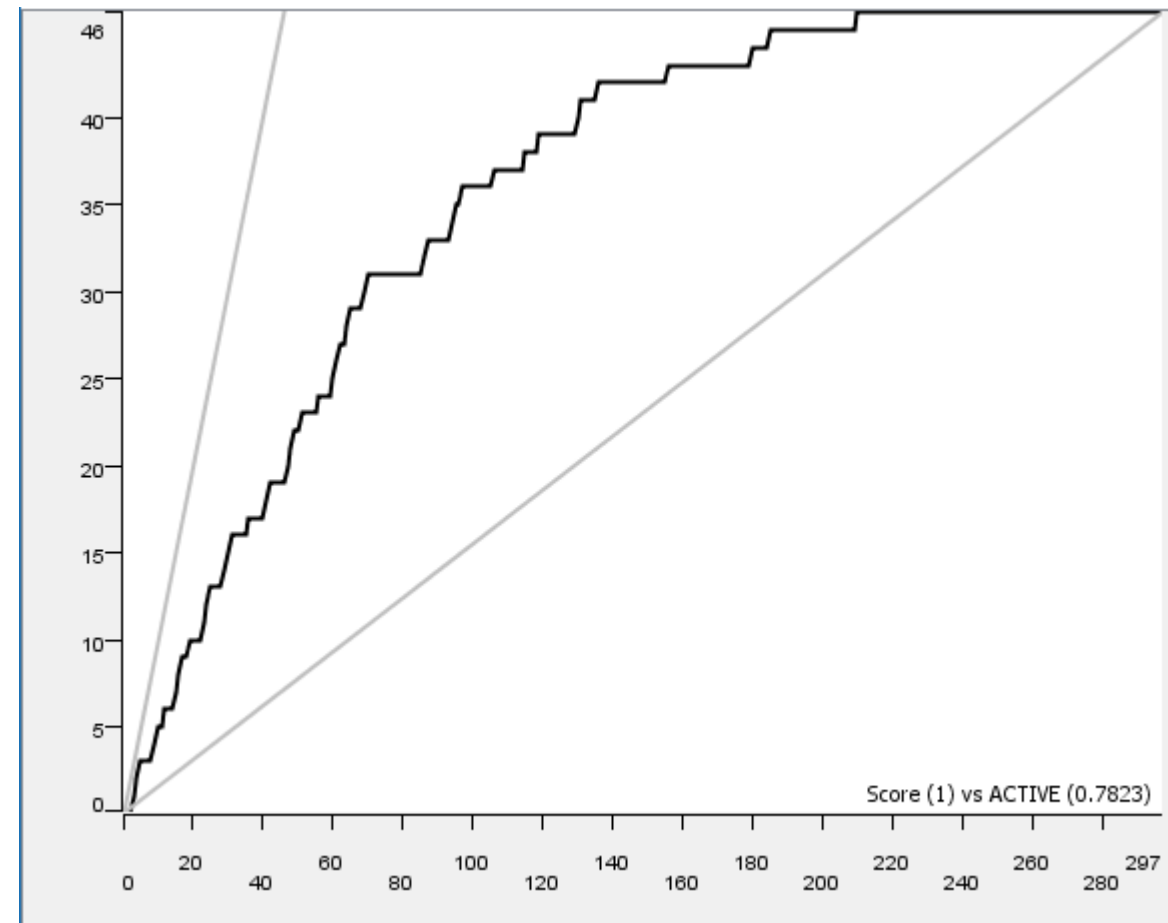

|          | Predicted Active | Predicted Inactive |
|----------|------------------|--------------------|
| Active   | 36               | 10                 |
| Inactive | 61               | 190                |

<10nM DefGood in aurora B, 20% error;  
Random seed = 429

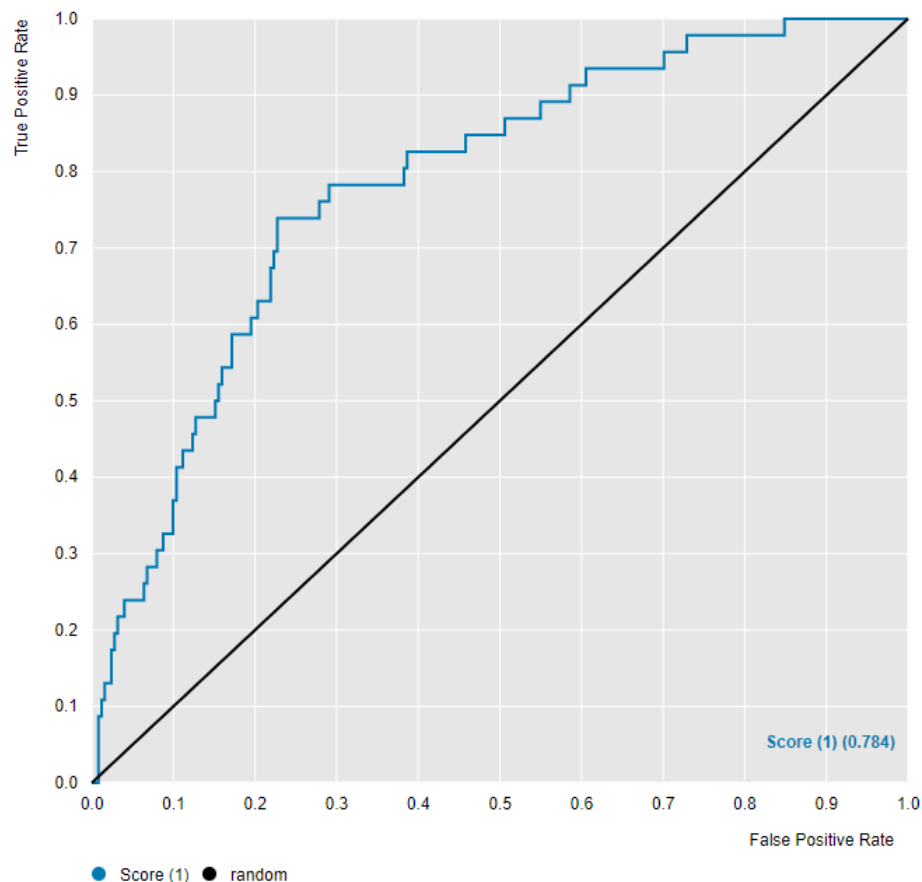

N=297

Top 10% Mean  
IC50

391 nM

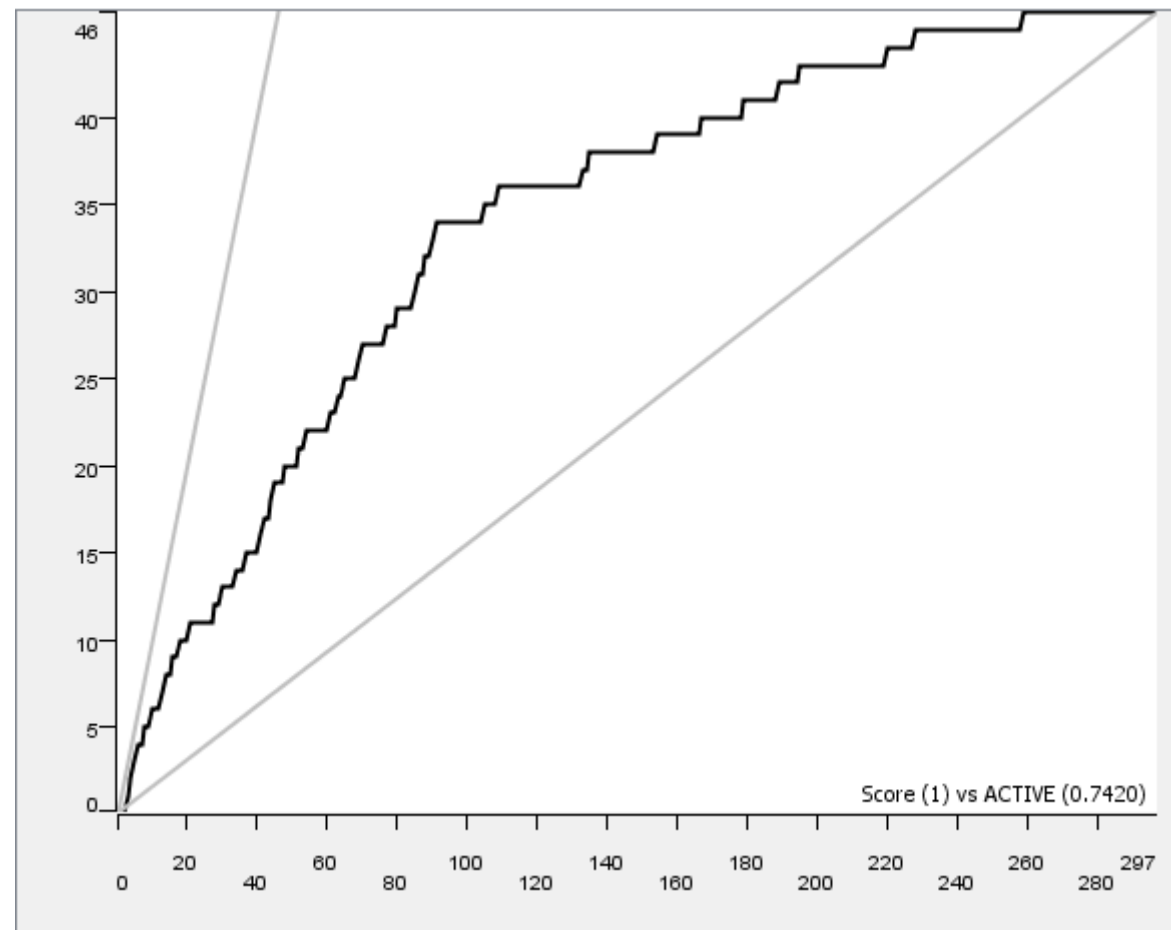

|          | Predicted Active | Predicted Inactive |
|----------|------------------|--------------------|
| Active   | 24               | 22                 |
| Inactive | 40               | 211                |

<10nM DefGood in aurora B, 25% error;  
Random seed = 429

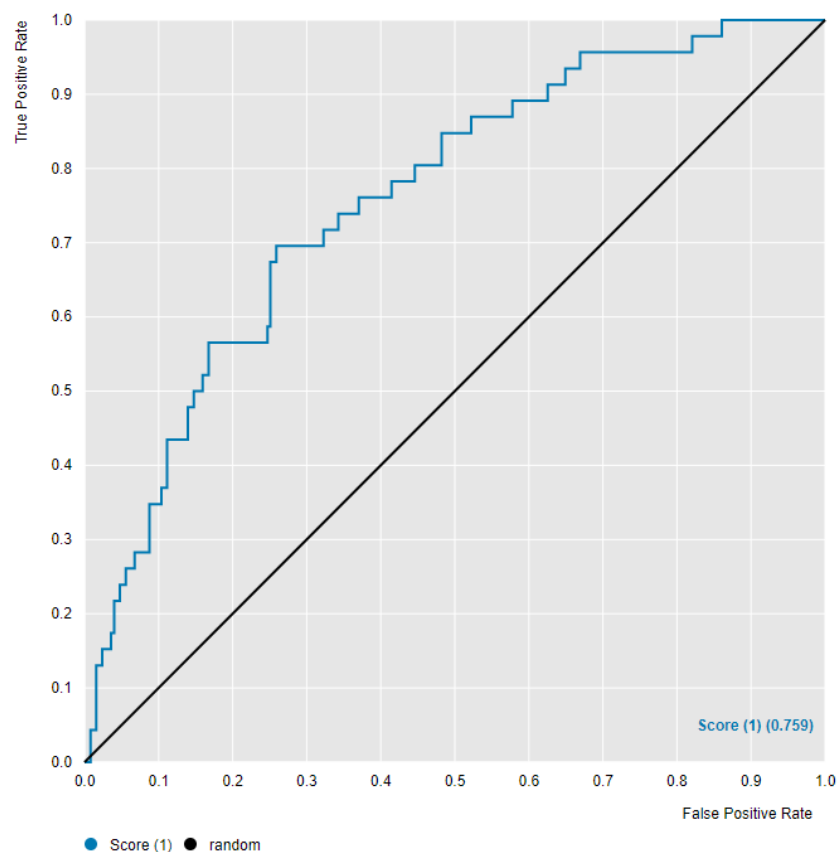

N=297

Top 10% Mean  
IC50

407 nM

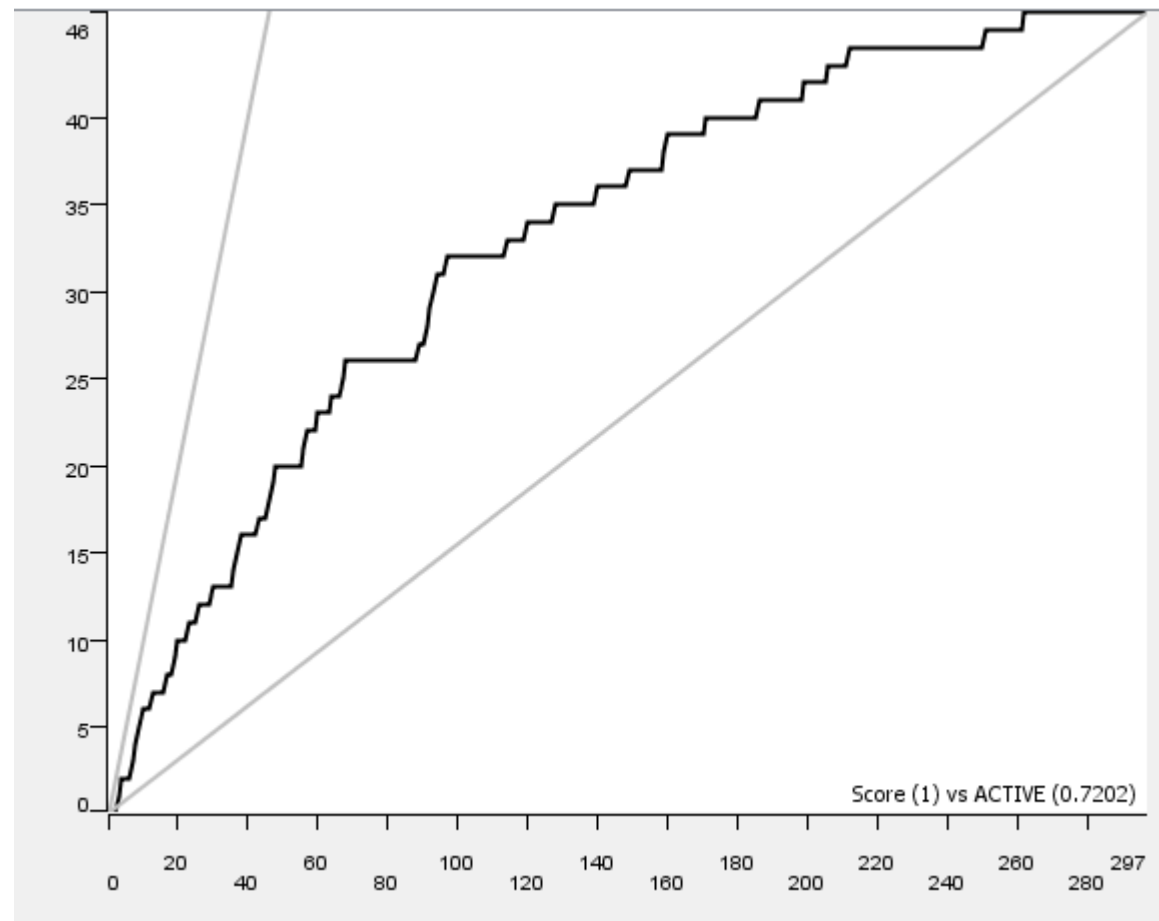

|          | Predicted Active | Predicted Inactive |
|----------|------------------|--------------------|
| Active   | 26               | 20                 |
| Inactive | 47               | 204                |

<10nM DefGood in aurora B, 30% error;  
Random seed = 429

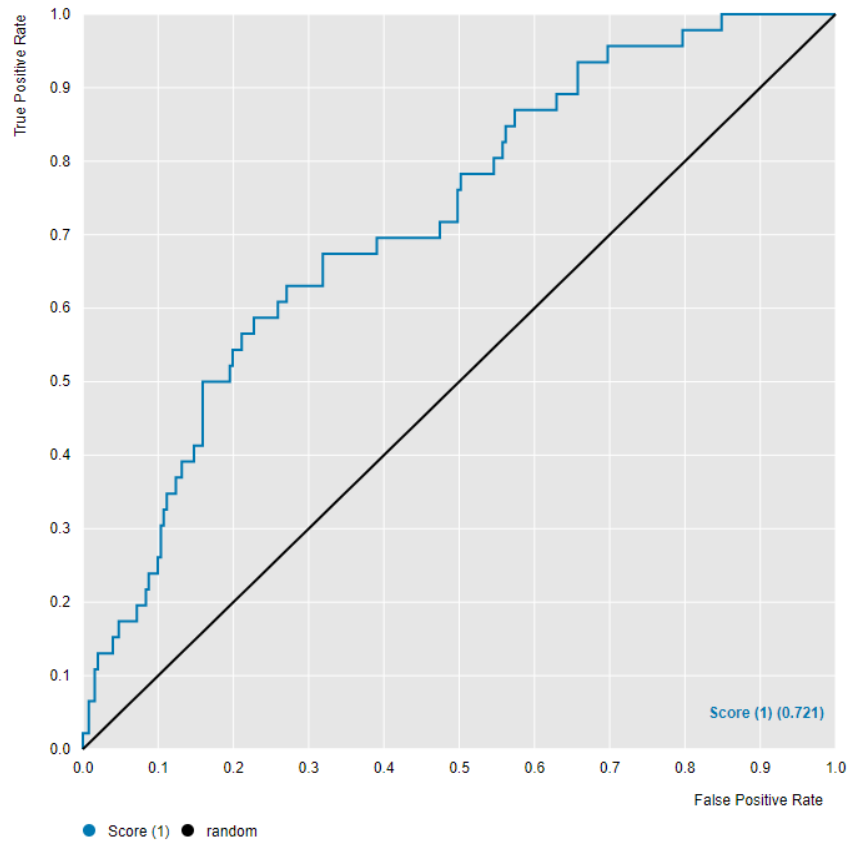

N=297

| Top 10% Mean<br>IC50 | 1,000 nM |
|----------------------|----------|
|----------------------|----------|

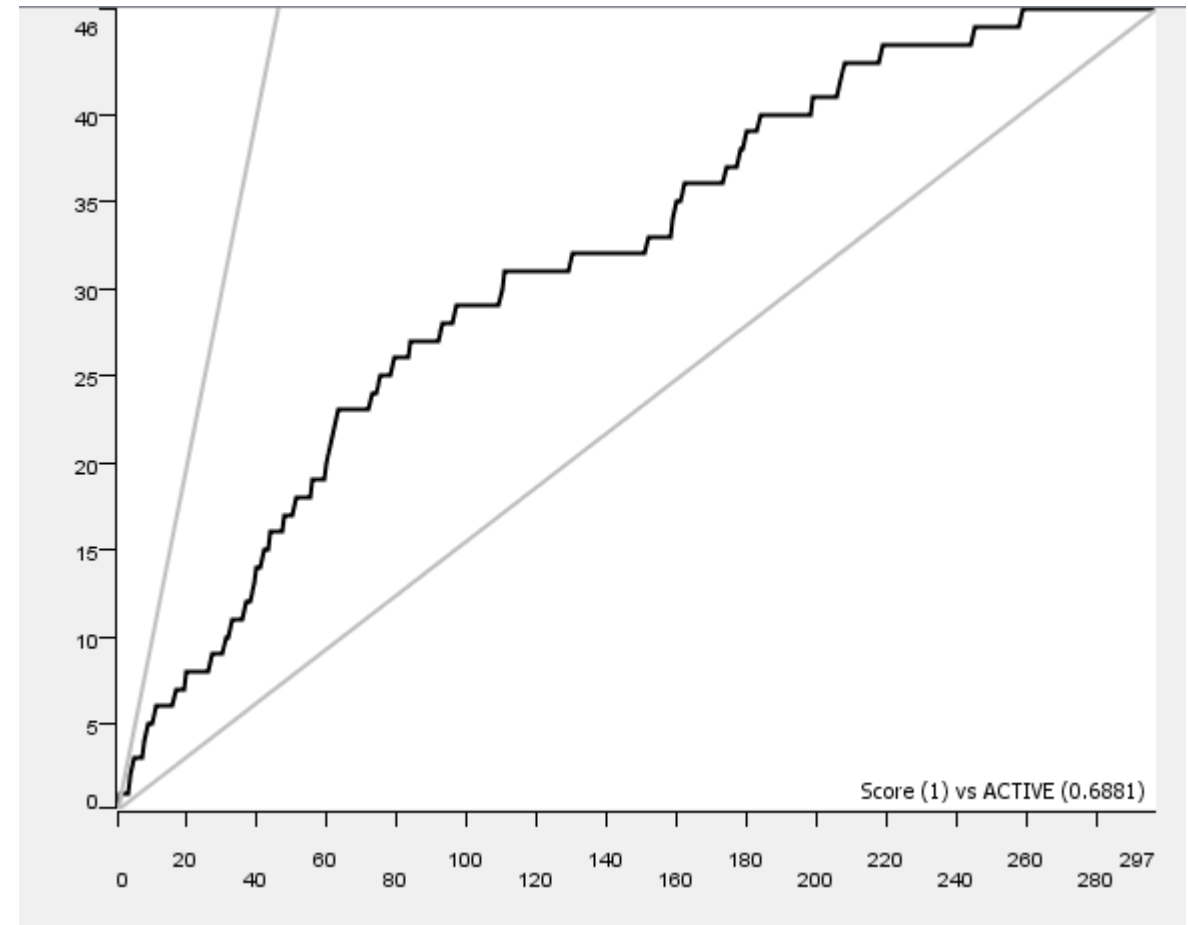

|          | Predicted Active | Predicted Inactive |
|----------|------------------|--------------------|
| Active   | 23               | 23                 |
| Inactive | 46               | 205                |

<10nM DefGood in aurora B, 10% error;  
Random seed = 121783

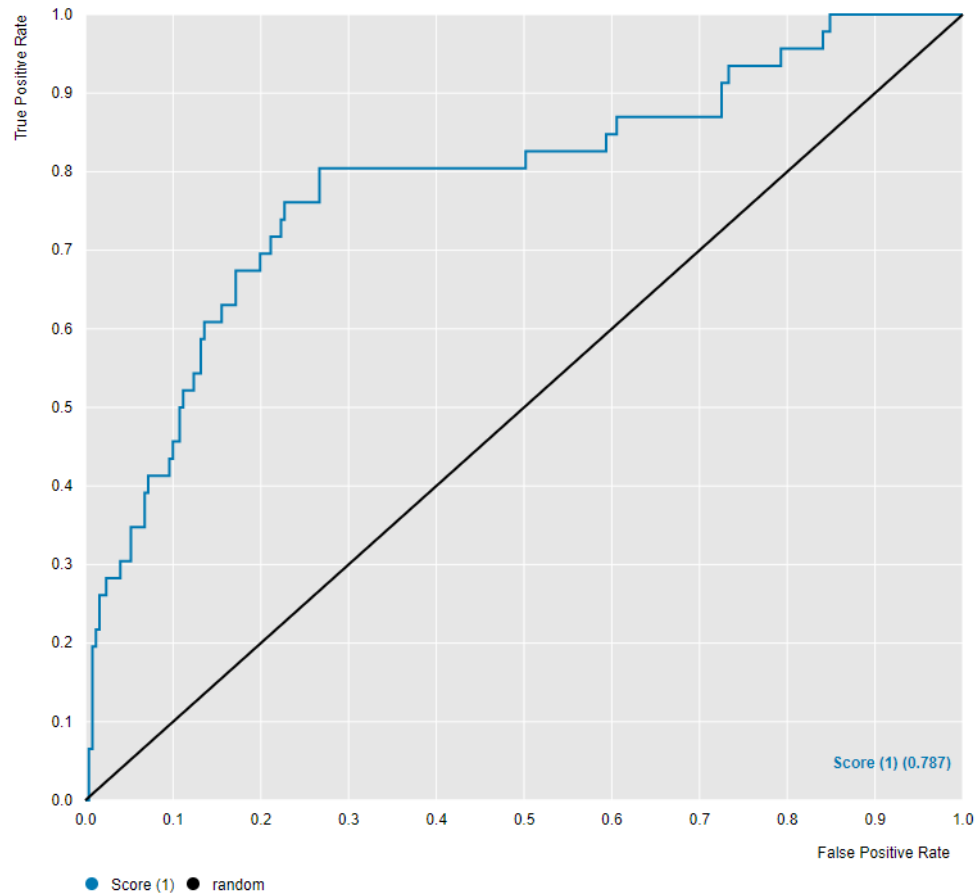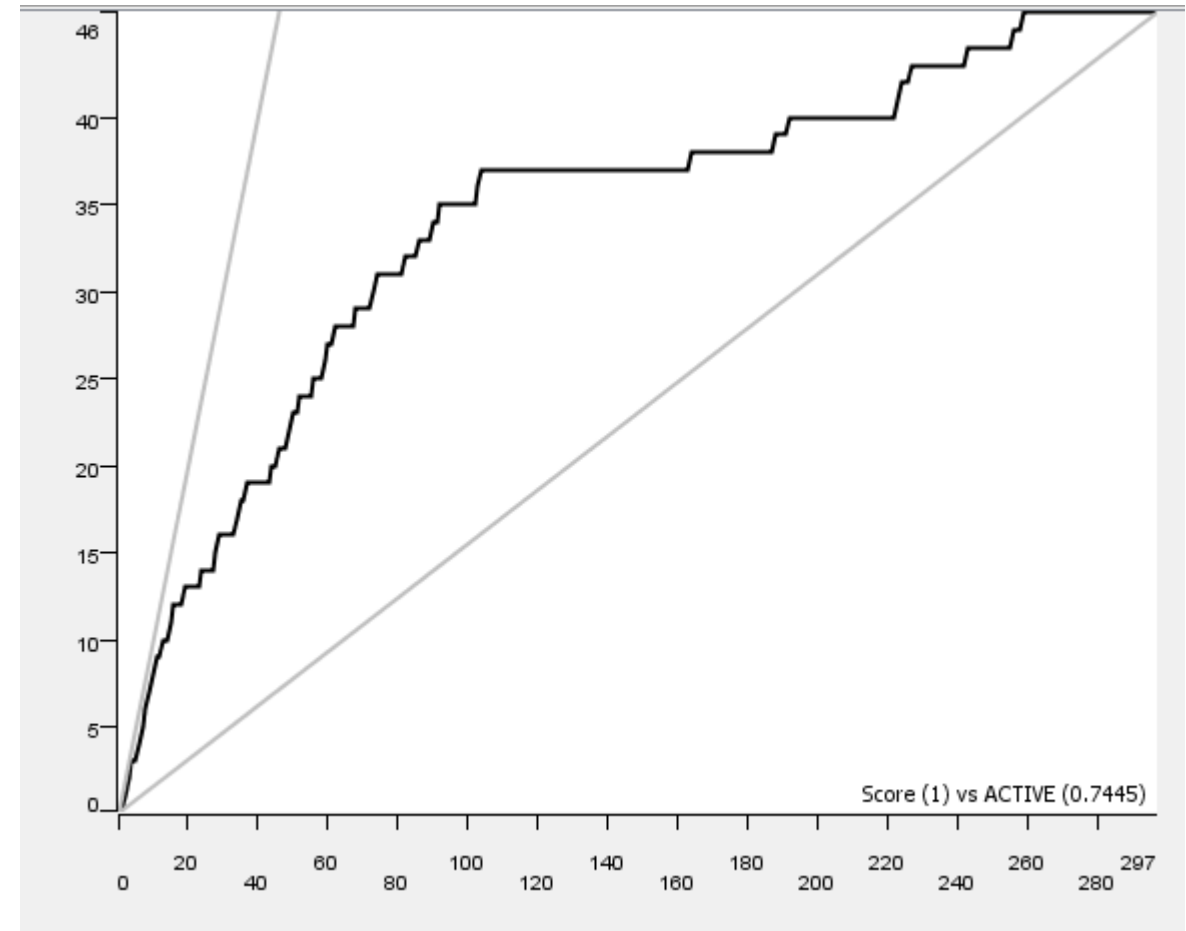

N=297

|                      |         |
|----------------------|---------|
| Top 10% Mean<br>IC50 | 42.7 nM |
|----------------------|---------|

|          | Predicted Active | Predicted Inactive |
|----------|------------------|--------------------|
| Active   | 23               | 23                 |
| Inactive | 28               | 223                |



<10nM DefGood in aurora B, 20% error;  
Random seed = 121783

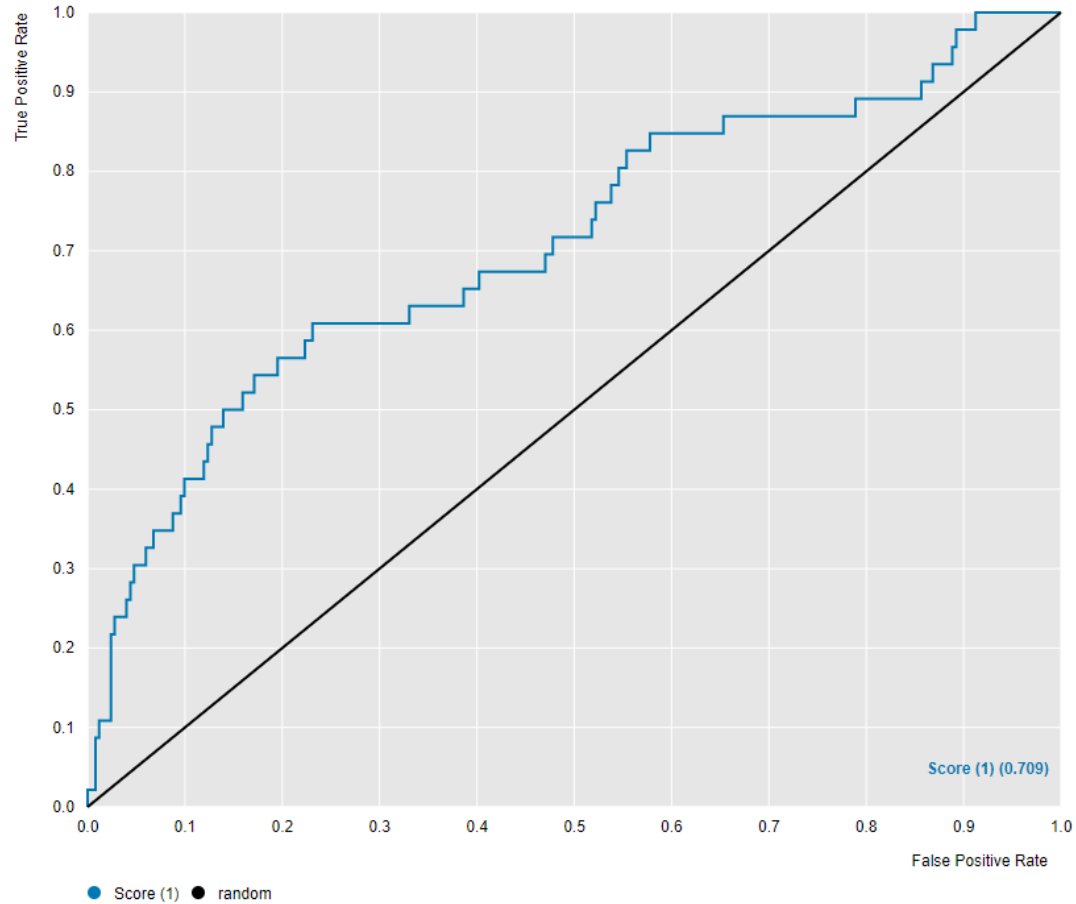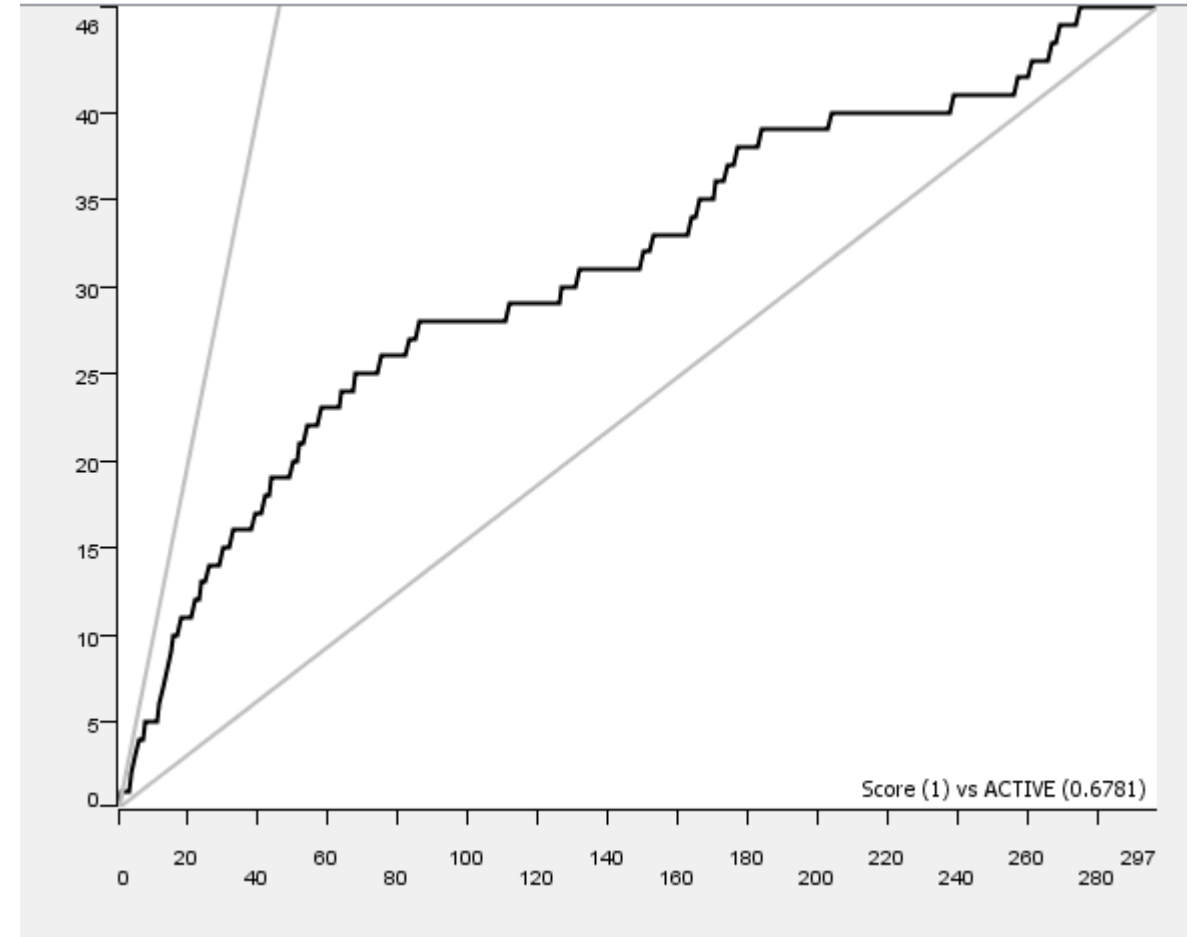

N=297

|                      |         |
|----------------------|---------|
| Top 10% Mean<br>IC50 | 53.9 nM |
|----------------------|---------|

|          | Predicted Active | Predicted Inactive |
|----------|------------------|--------------------|
| Active   | 27               | 19                 |
| Inactive | 58               | 193                |

<10nM DefGood in aurora B, 25% error;  
Random seed = 121783

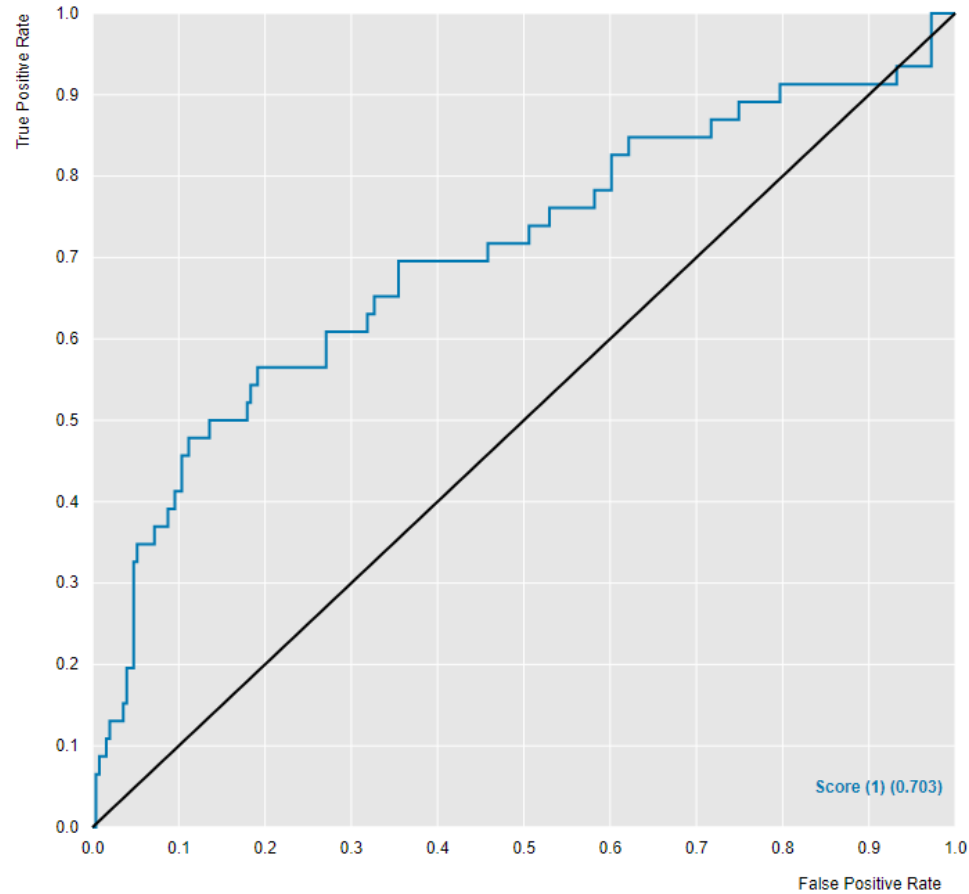

N=297

● Score (1) ● random

Top 10% Mean  
IC50

83.4 nM

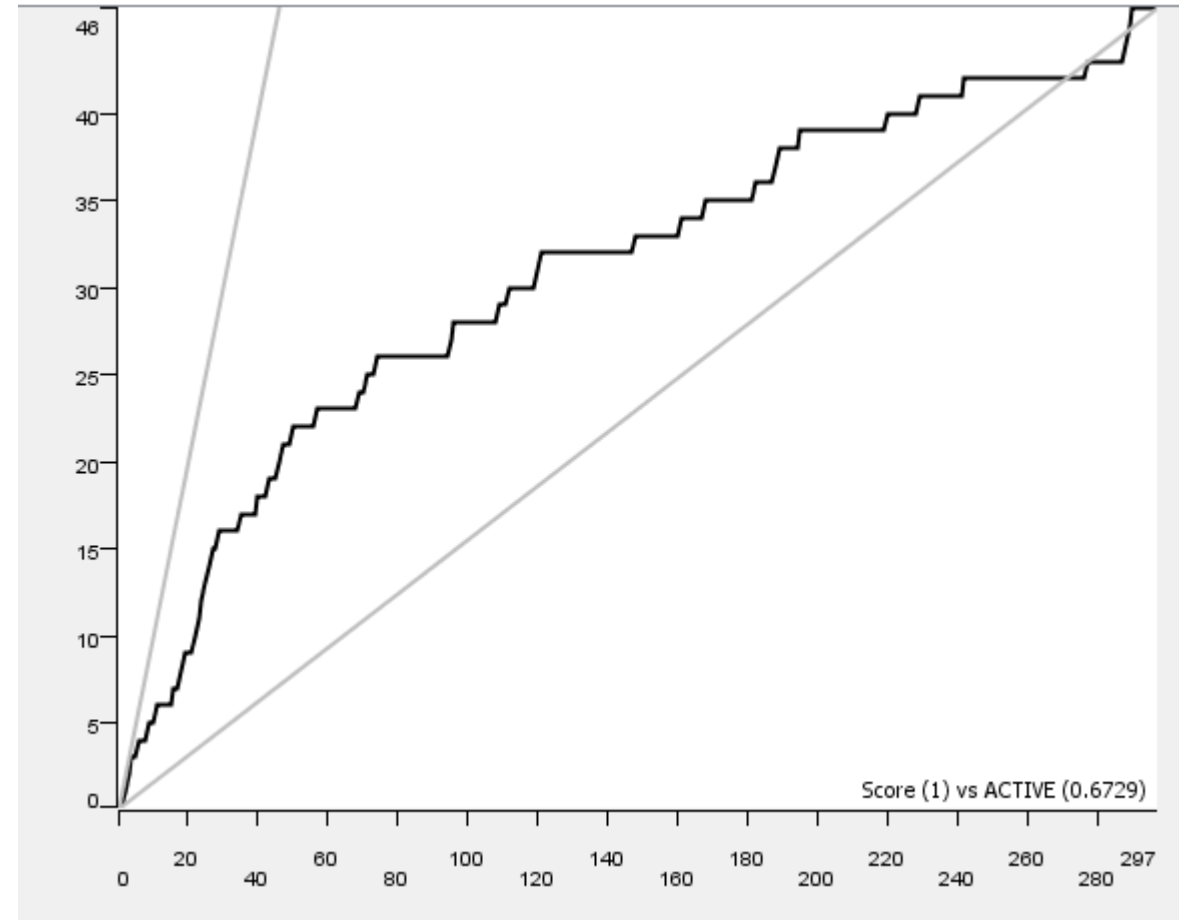

|          | Predicted Active | Predicted Inactive |
|----------|------------------|--------------------|
| Active   | 26               | 20                 |
| Inactive | 53               | 198                |

<10nM DefGood in aurora B, 30% error;  
Random seed = 121783

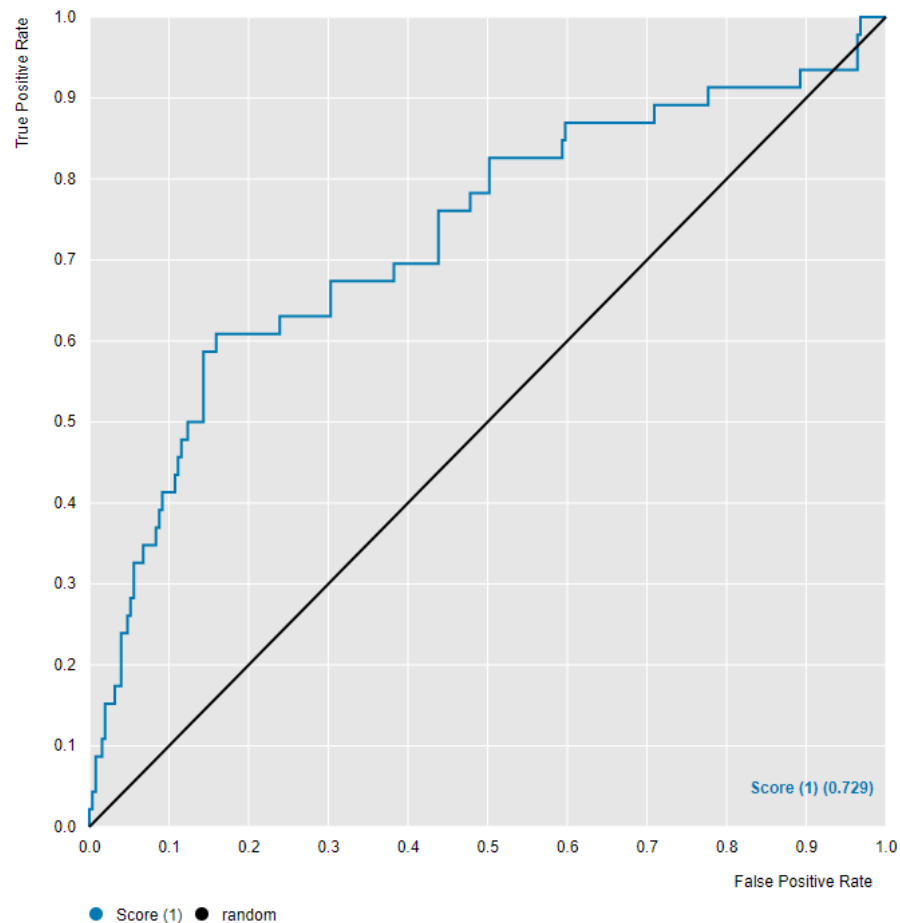

N=297

|                      |         |
|----------------------|---------|
| Top 10% Mean<br>IC50 | 67.4 nM |
|----------------------|---------|

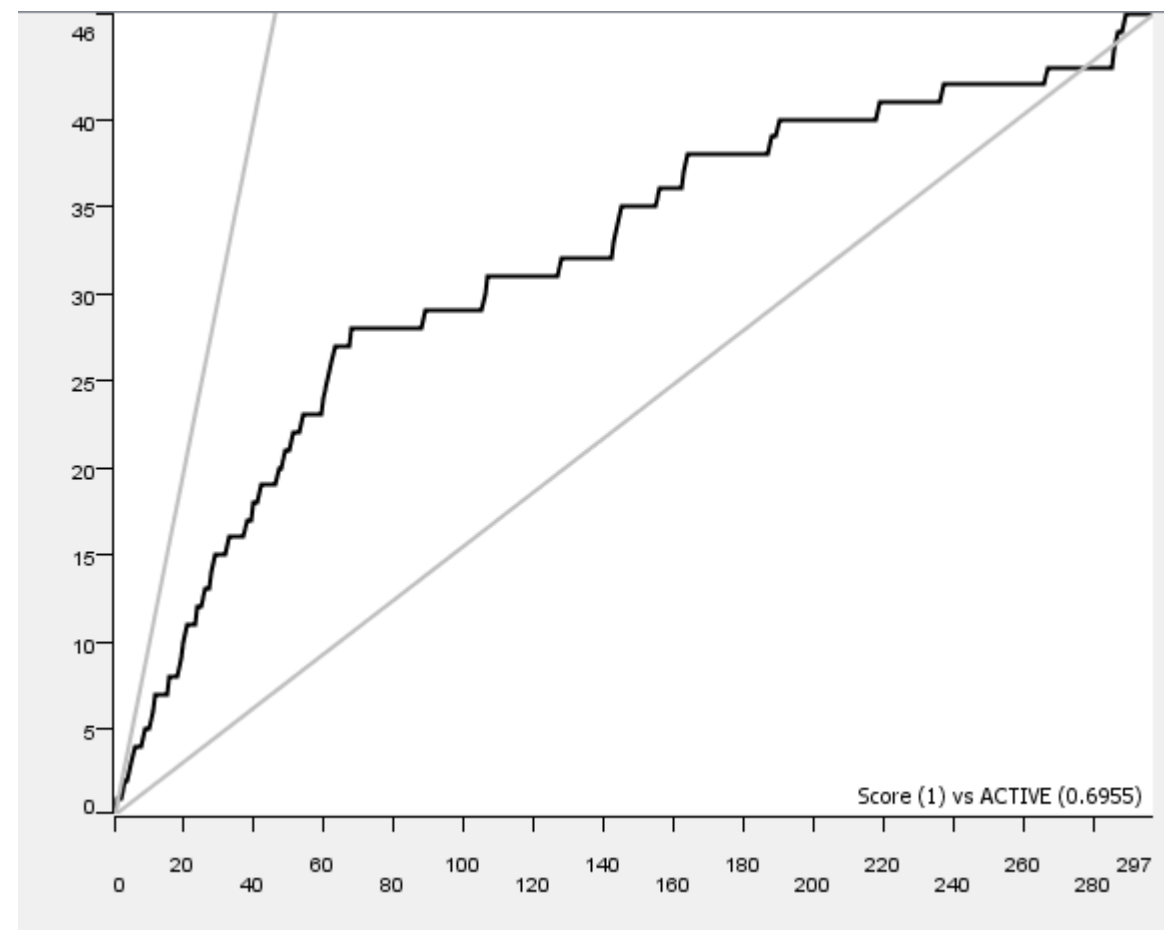

|          | Predicted Active | Predicted Inactive |
|----------|------------------|--------------------|
| Active   | 28               | 18                 |
| Inactive | 52               | 199                |

<10nM DefGood in aurora B, 35% error;  
Random seed = 121783

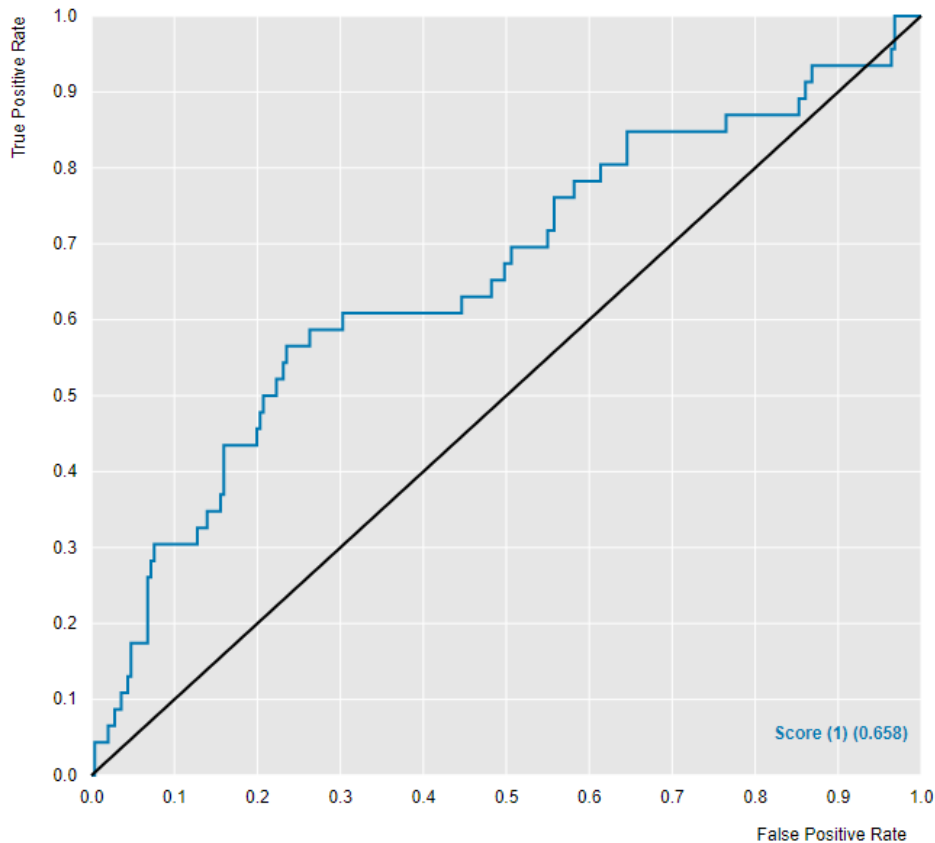

N=297

● Score (1) ● random

| Top 10% Mean IC50 | 67.4 nM |
|-------------------|---------|
|-------------------|---------|

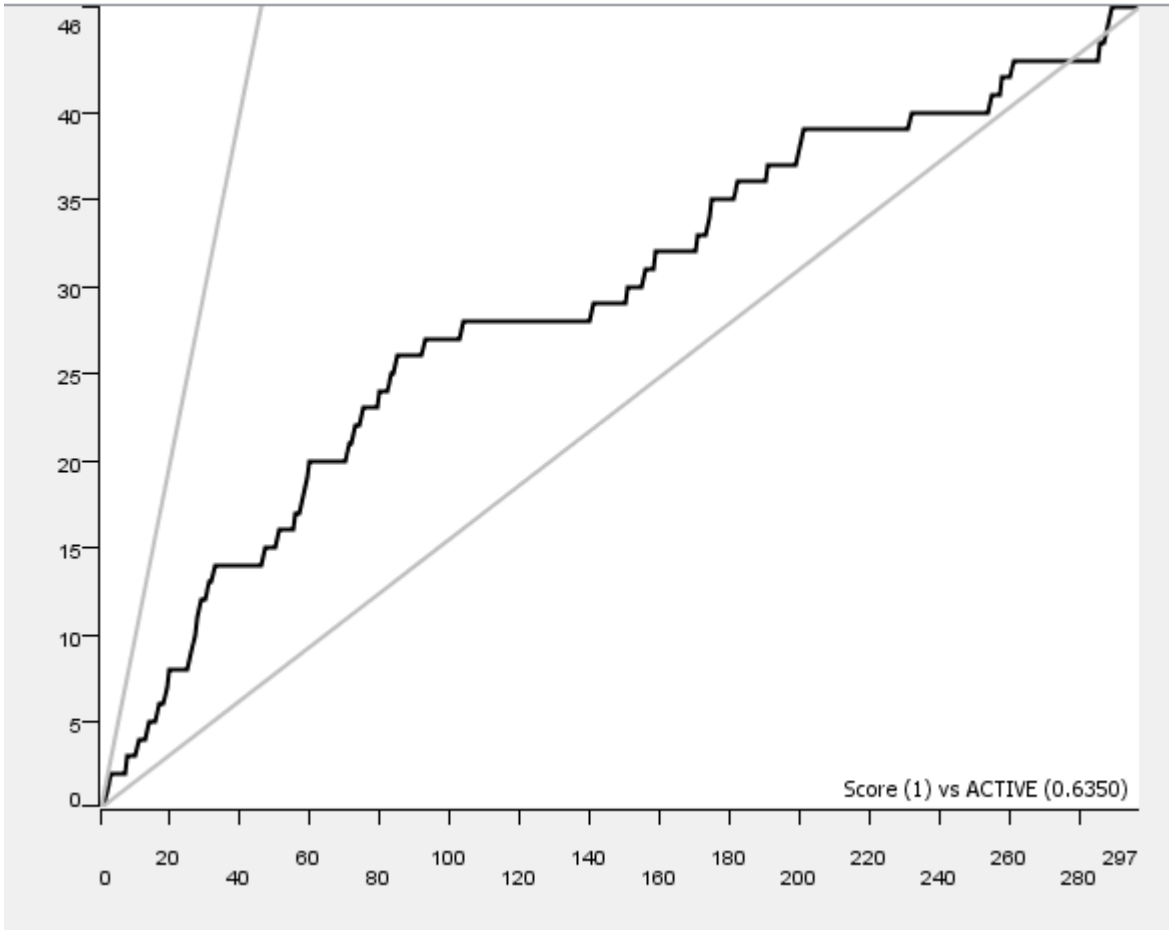

|          | Predicted Active | Predicted Inactive |
|----------|------------------|--------------------|
| Active   | 28               | 18                 |
| Inactive | 52               | 199                |

# Conclusion - NBN

- An NBN could be generated for aurora B kinase with a decision value of  $<10$  nM as defined as active. The predictivity of the algorithm could be preserved in three random train/test cycles. The point of failure was 30%, 30% and 35% error.

# RF Error Tolerance- <10 nM DefGood in Aurora B

- 0-50% absolute error

# RF- <10nM DefGood in aurora B, 10% error

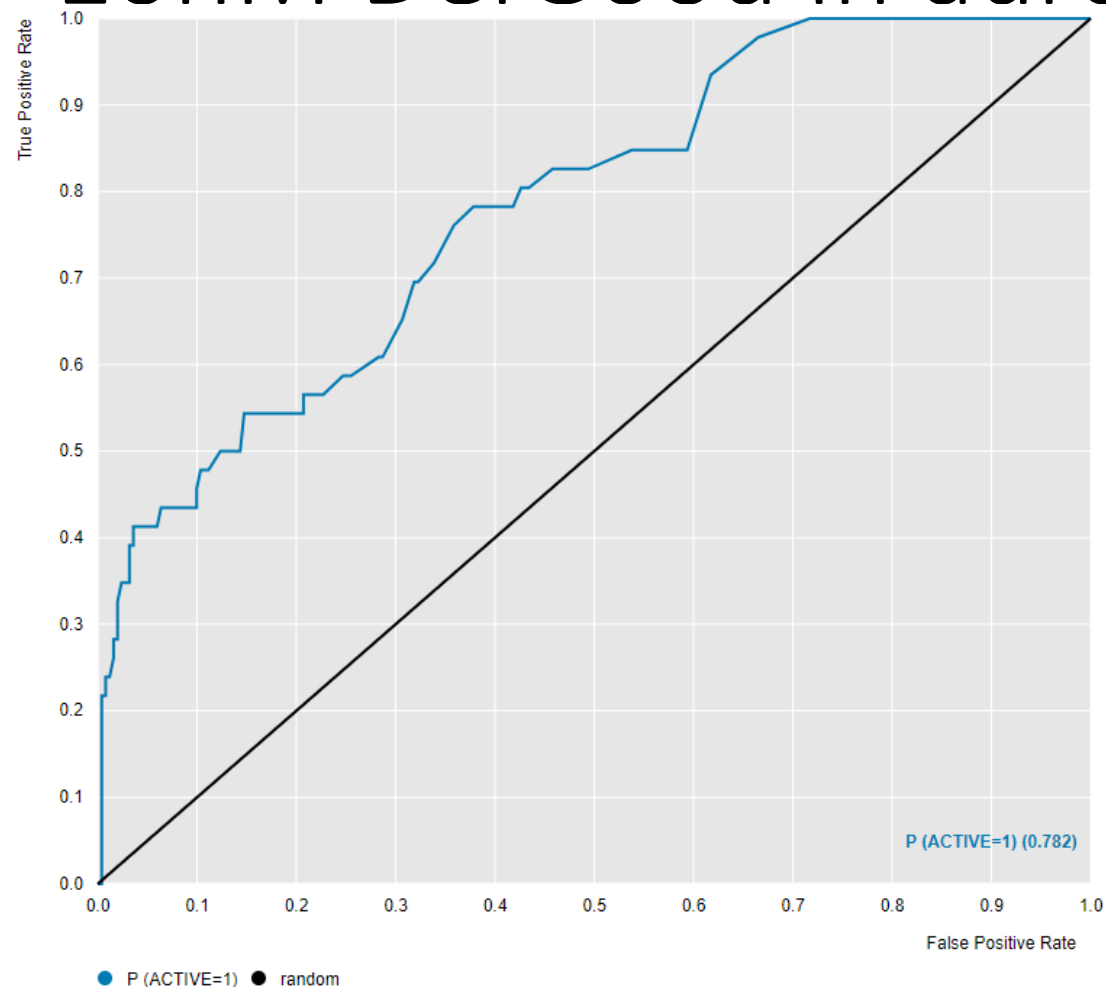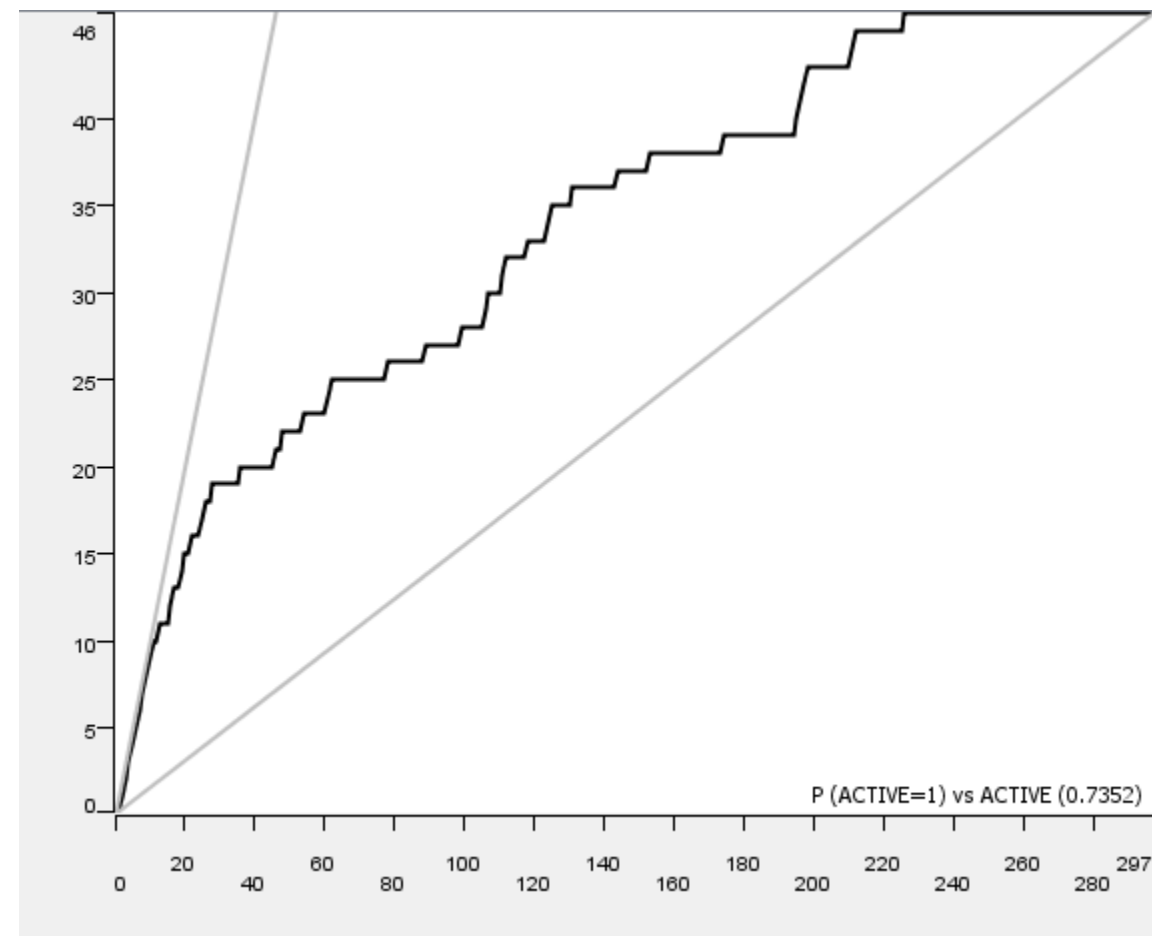

N=297

|                      |         |
|----------------------|---------|
| Top 10% Mean<br>IC50 | 93.1 nM |
|----------------------|---------|

|          | Predicted Active | Predicted Inactive |
|----------|------------------|--------------------|
| Active   | 19               | 27                 |
| Inactive | 15               | 236                |

# RF- <10nM DefGood in aurora B, 15% error

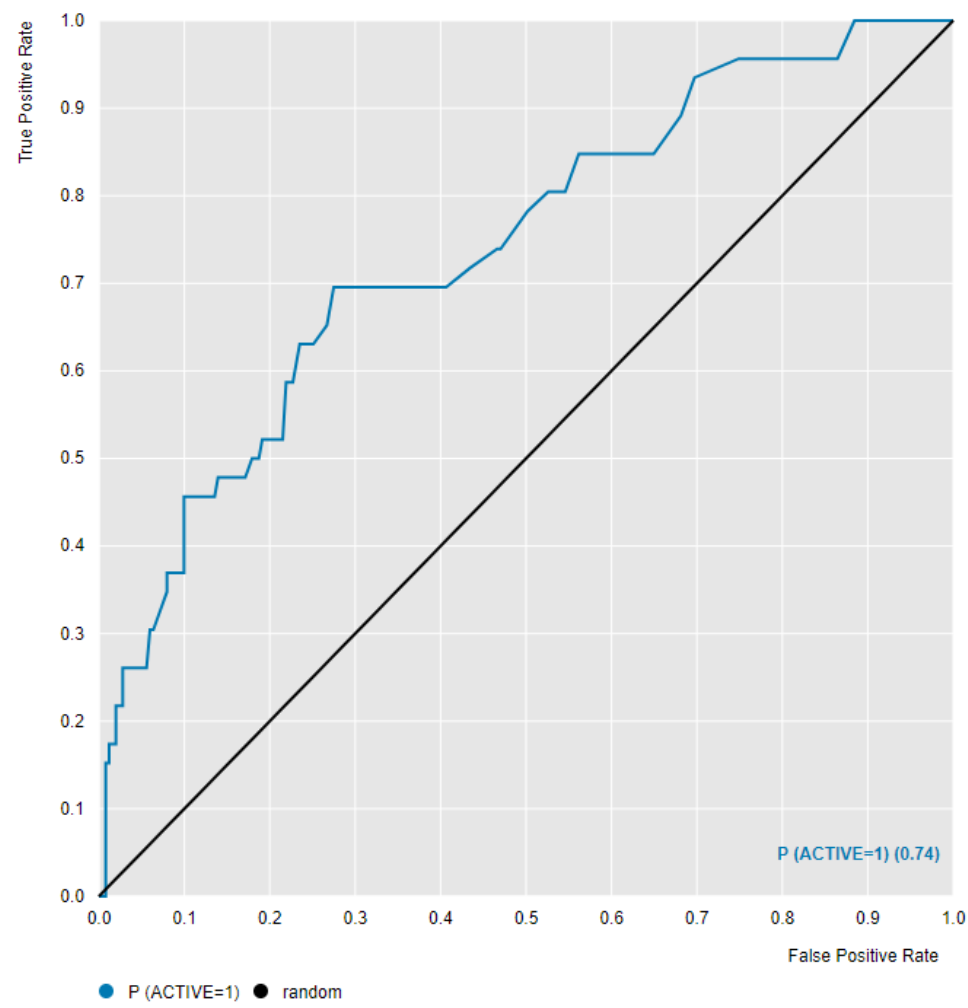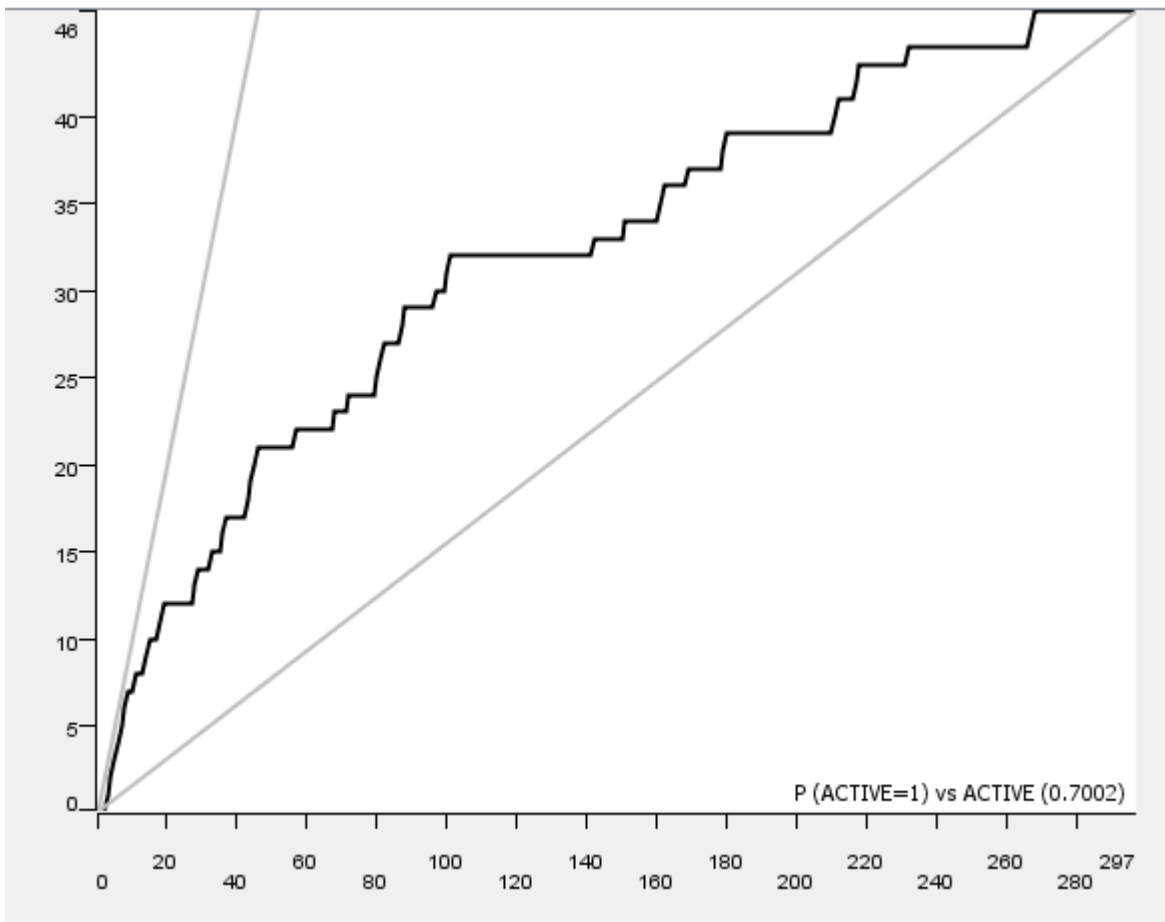

N=297

|                   |        |
|-------------------|--------|
| Top 10% Mean IC50 | 128 nM |
|-------------------|--------|

|          | Predicted Active | Predicted Inactive |
|----------|------------------|--------------------|
| Active   | 17               | 29                 |
| Inactive | 24               | 227                |



# RF- <10nM DefGood in aurora B, 20% error

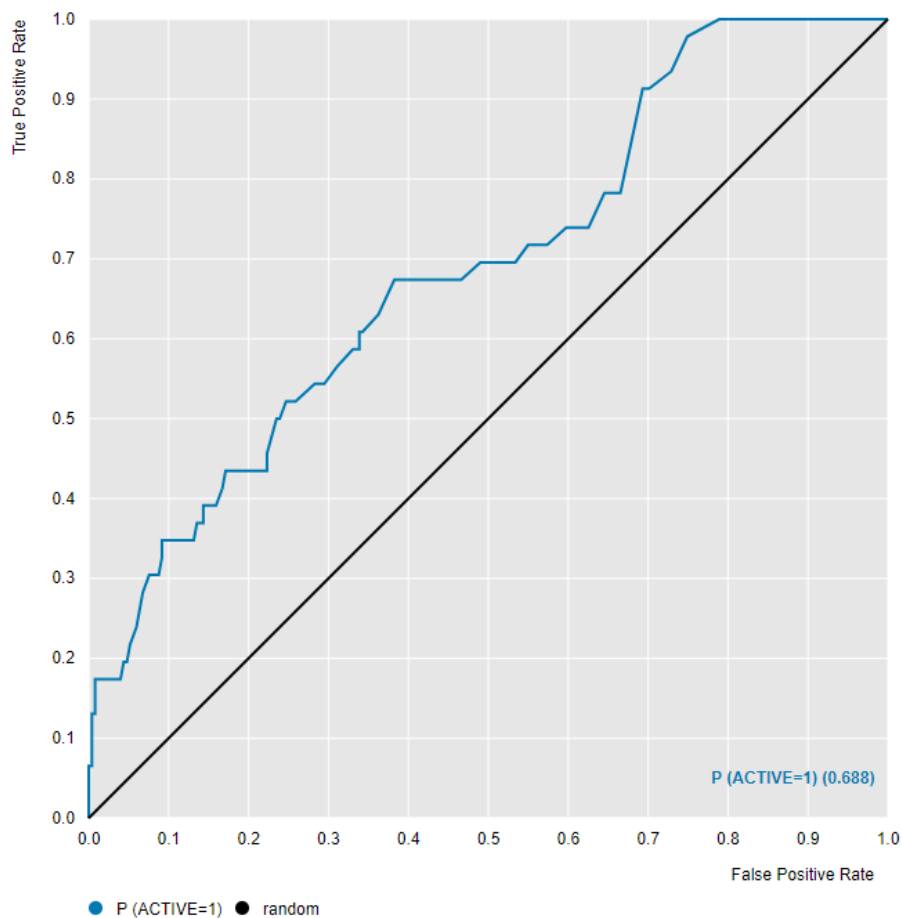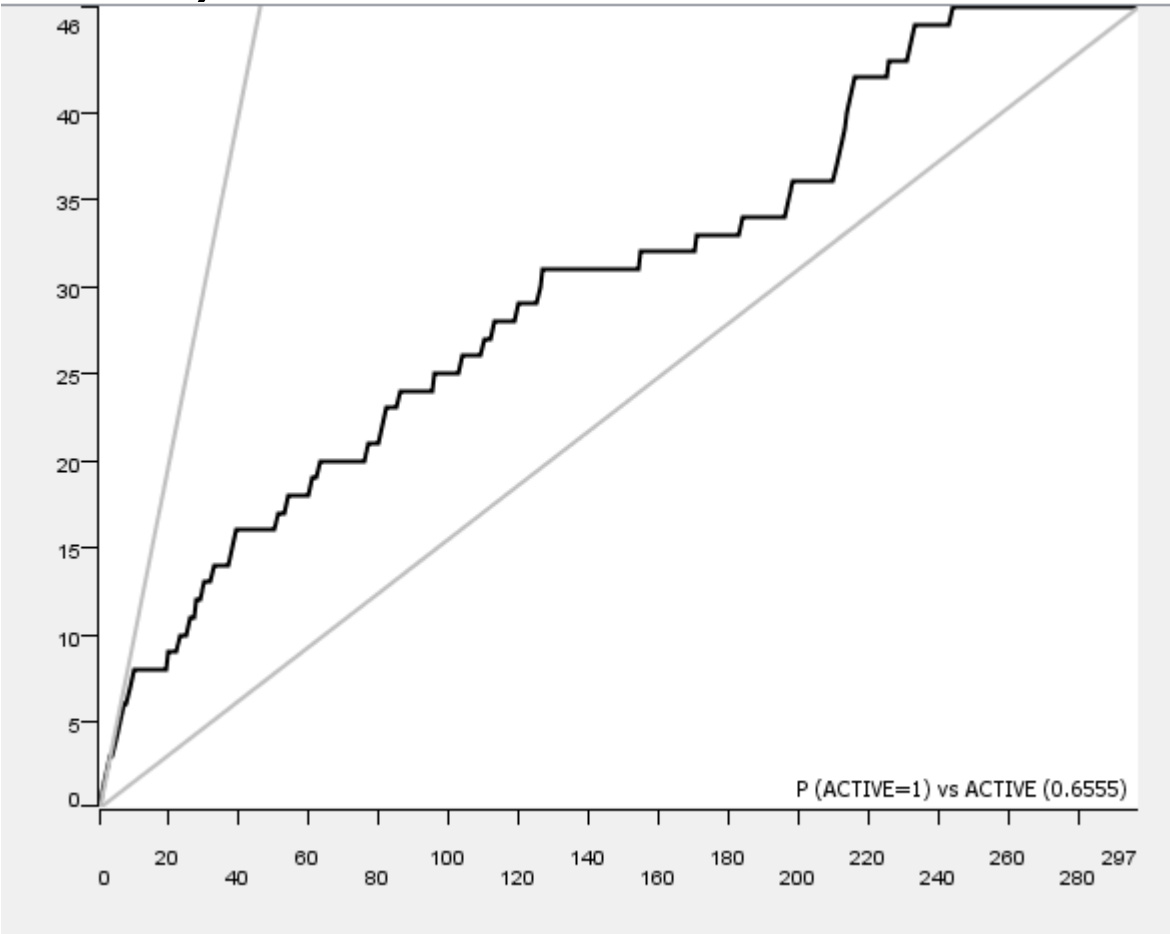

N=297

| Top 10% Mean IC50 | 534 nM |
|-------------------|--------|
|-------------------|--------|

|          | Predicted Active | Predicted Inactive |
|----------|------------------|--------------------|
| Active   | 17               | 29                 |
| Inactive | 36               | 215                |

<10nM DefGood in aurora B, 10% error;  
Random seed = 429

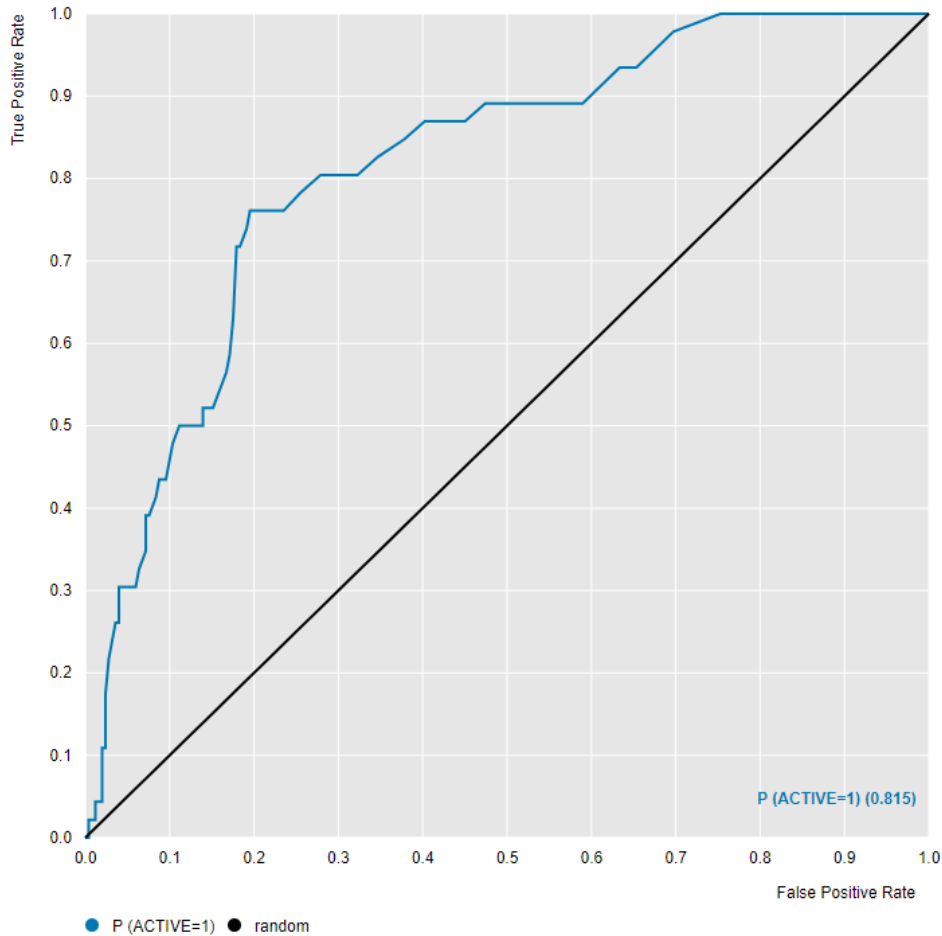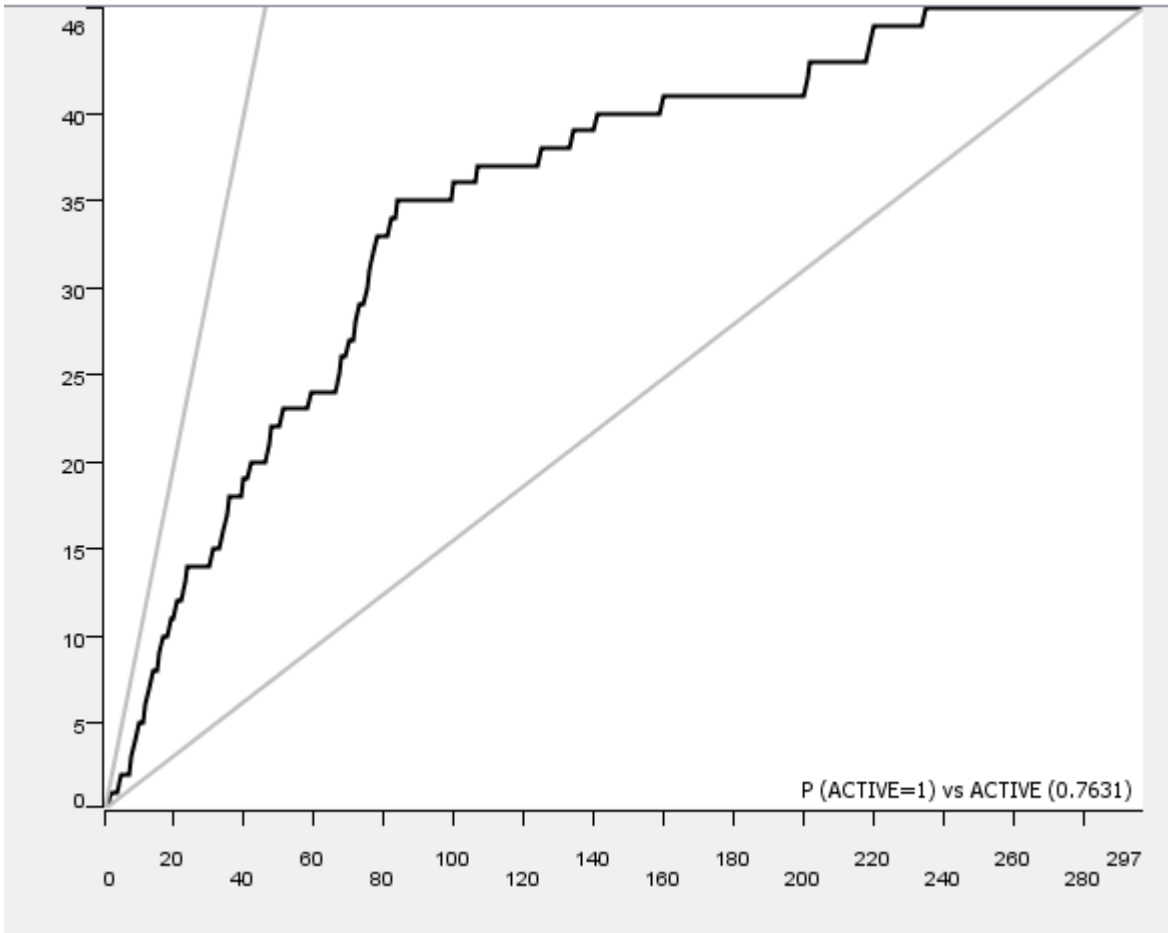

N=297

|                      |                                         |
|----------------------|-----------------------------------------|
| Top 10% Mean<br>IC50 | 365 nM<br>(one > 10,000<br>nM compound) |
|----------------------|-----------------------------------------|

|          | Predicted Active | Predicted Inactive |
|----------|------------------|--------------------|
| Active   | 19               | 27                 |
| Inactive | 21               | 230                |

<10nM DefGood in aurora B, 15% error;  
Random seed = 429

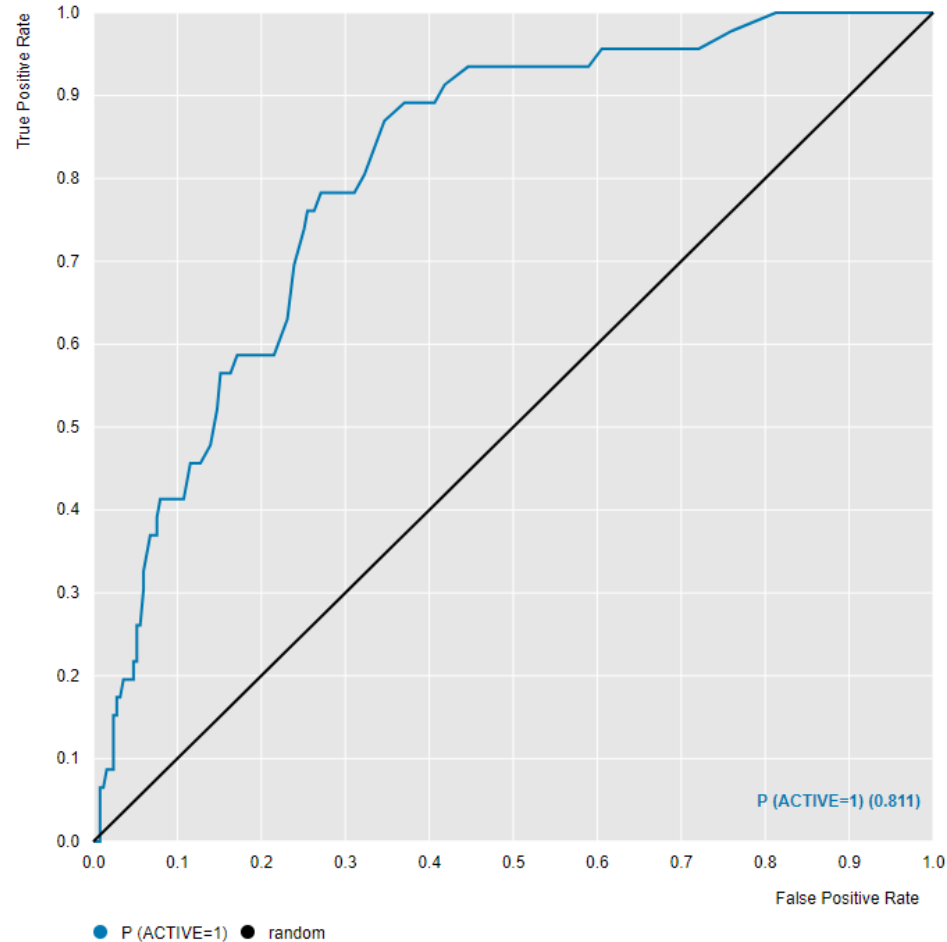

N=297

Top 10% Mean  
IC50

656 nM

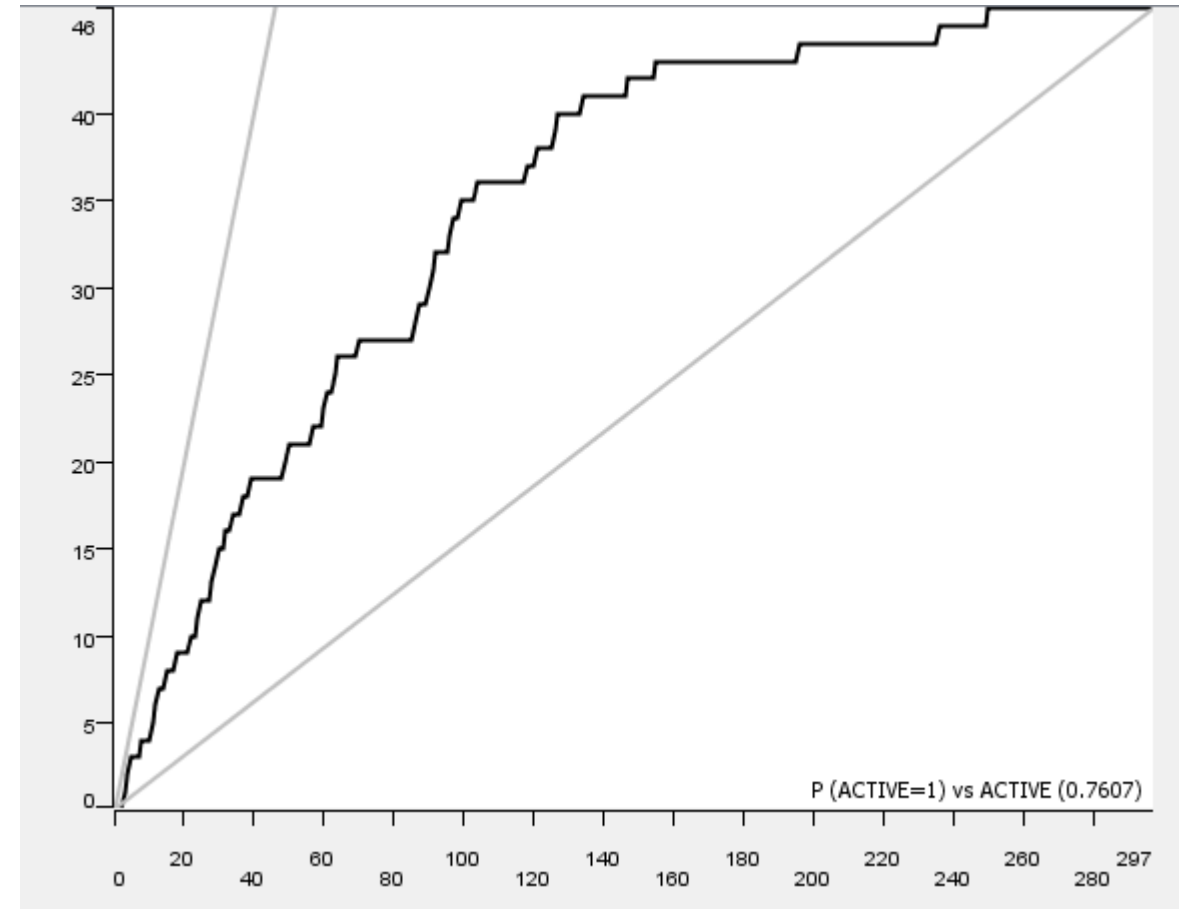

|          | Predicted Active | Predicted Inactive |
|----------|------------------|--------------------|
| Active   | 19               | 27                 |
| Inactive | 24               | 227                |

<10nM DefGood in aurora B, 20% error;  
Random seed = 429

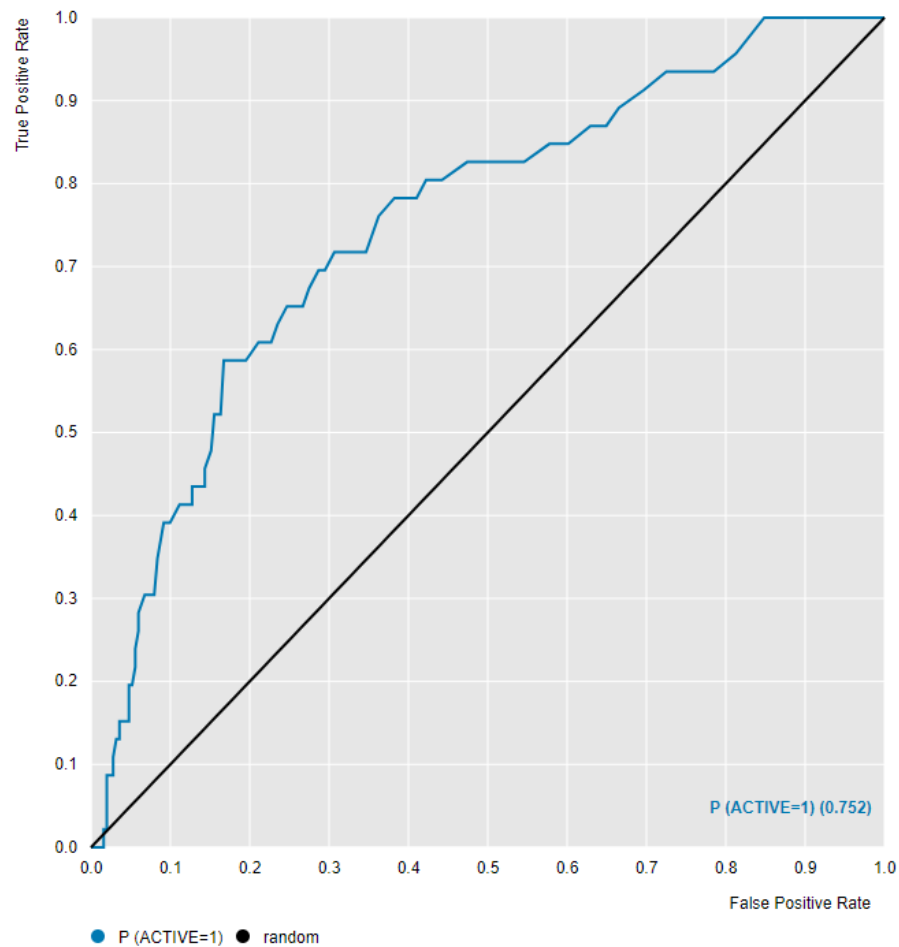

N=270

| Top 10% Mean IC50 | 1,000 nM |
|-------------------|----------|
|-------------------|----------|

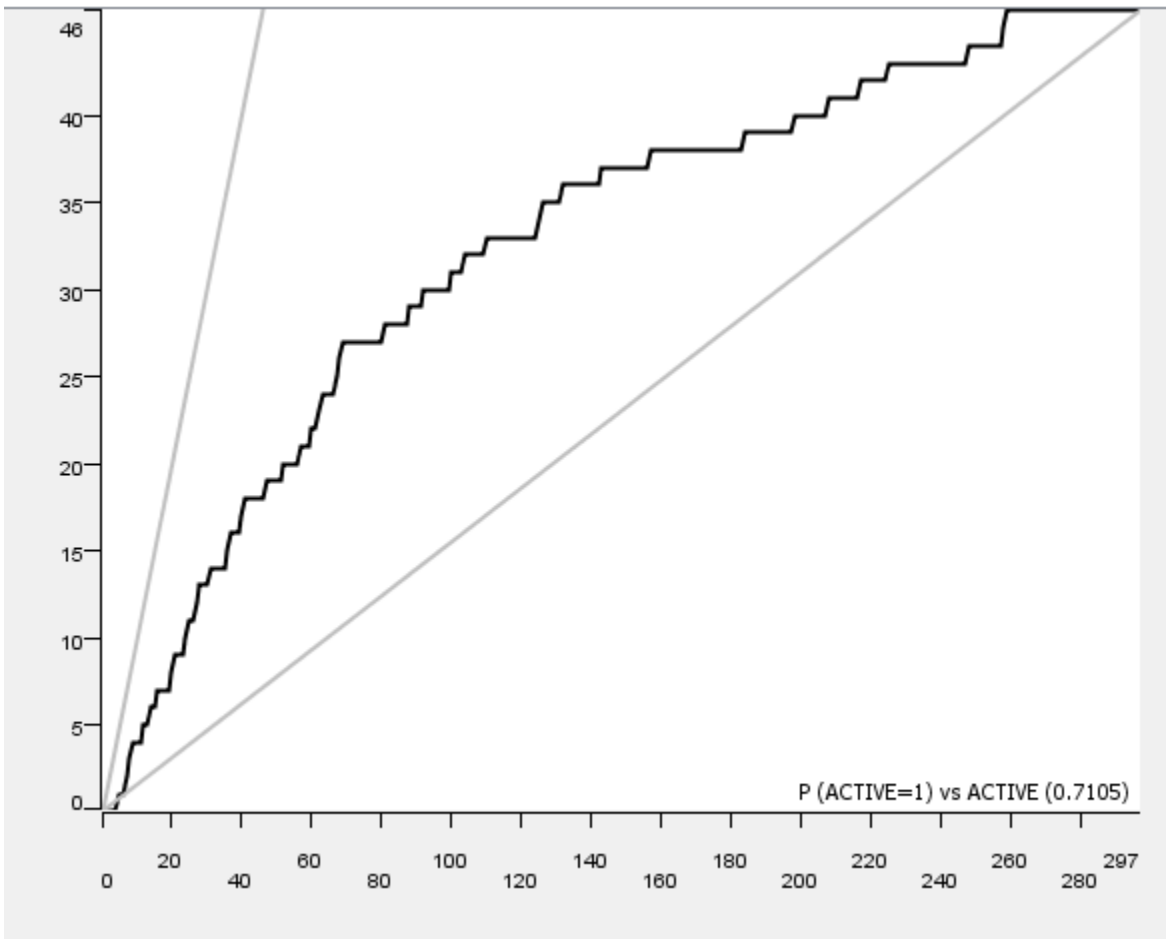

|          | Predicted Active | Predicted Inactive |
|----------|------------------|--------------------|
| Active   | 20               | 26                 |
| Inactive | 35               | 216                |

<10nM DefGood in aurora B, 10% error;  
Random seed = 121783

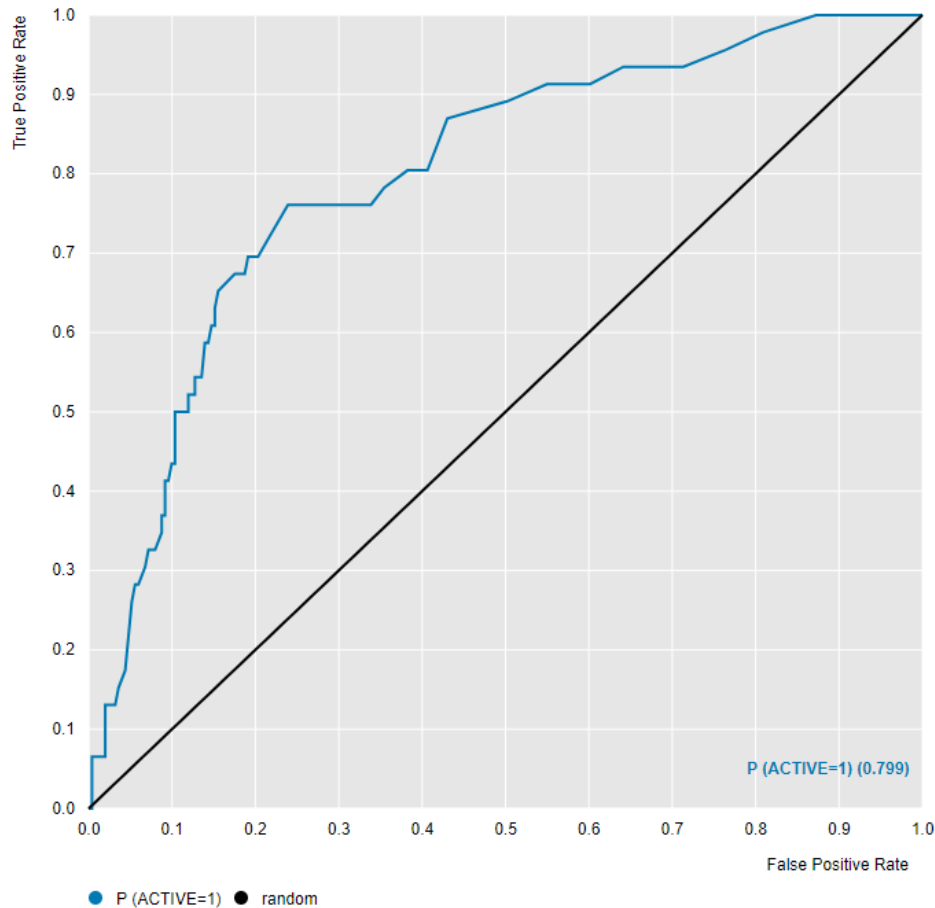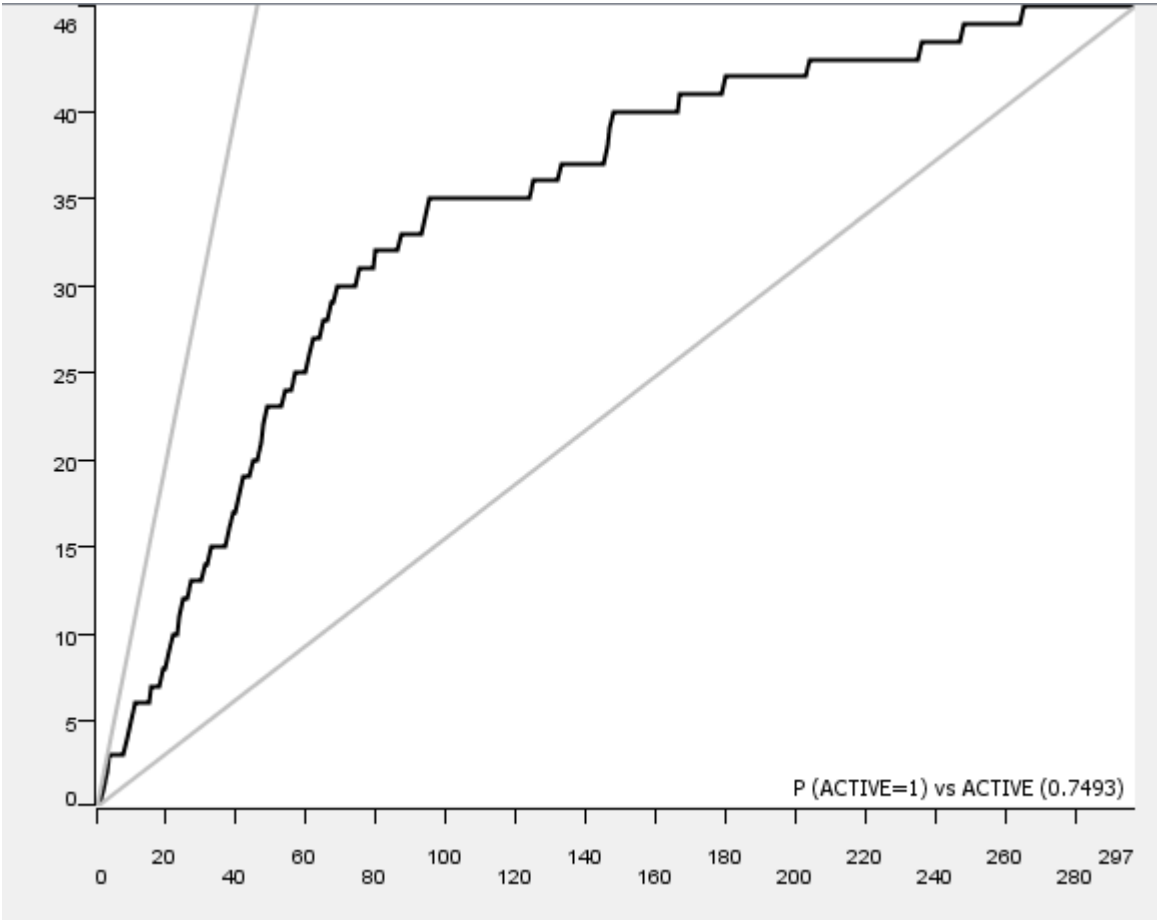

N=297

|                   |        |
|-------------------|--------|
| Top 10% Mean IC50 | 221 nM |
|-------------------|--------|

|          | Predicted Active | Predicted Inactive |
|----------|------------------|--------------------|
| Active   | 17               | 29                 |
| Inactive | 22               | 229                |

<10nM DefGood in aurora B, 20% error;  
Random seed = 121783

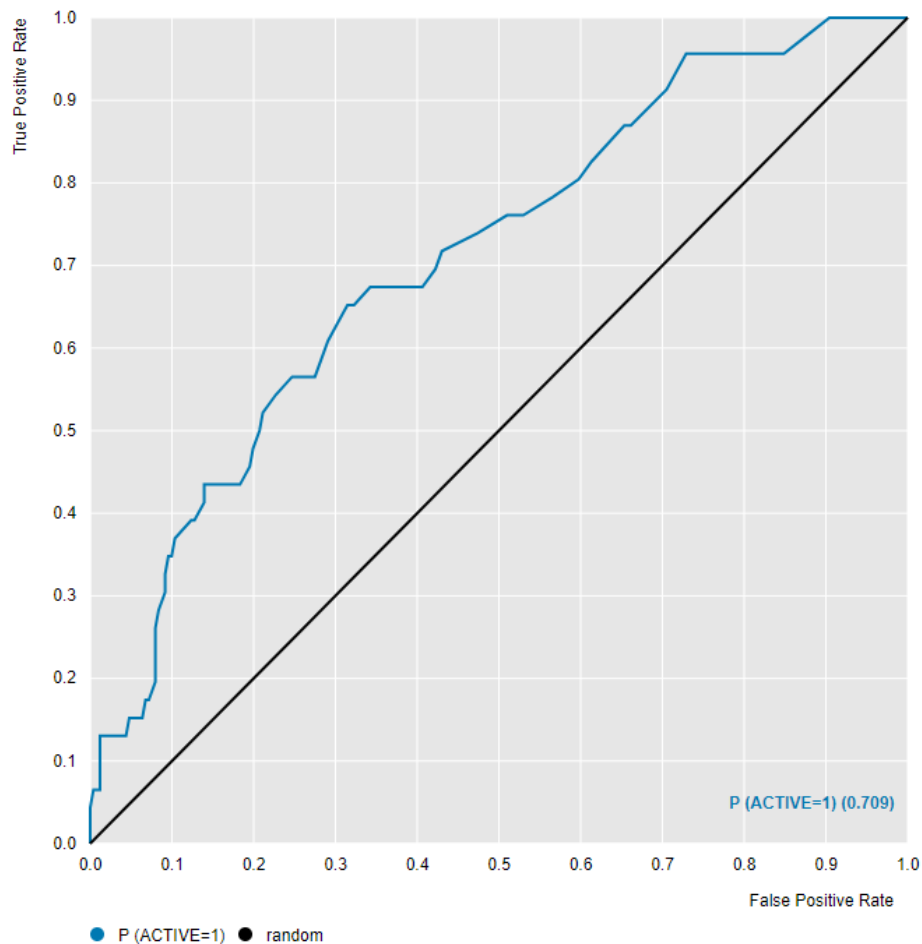

N=297

|                      |        |
|----------------------|--------|
| Top 10% Mean<br>IC50 | 395 nM |
|----------------------|--------|

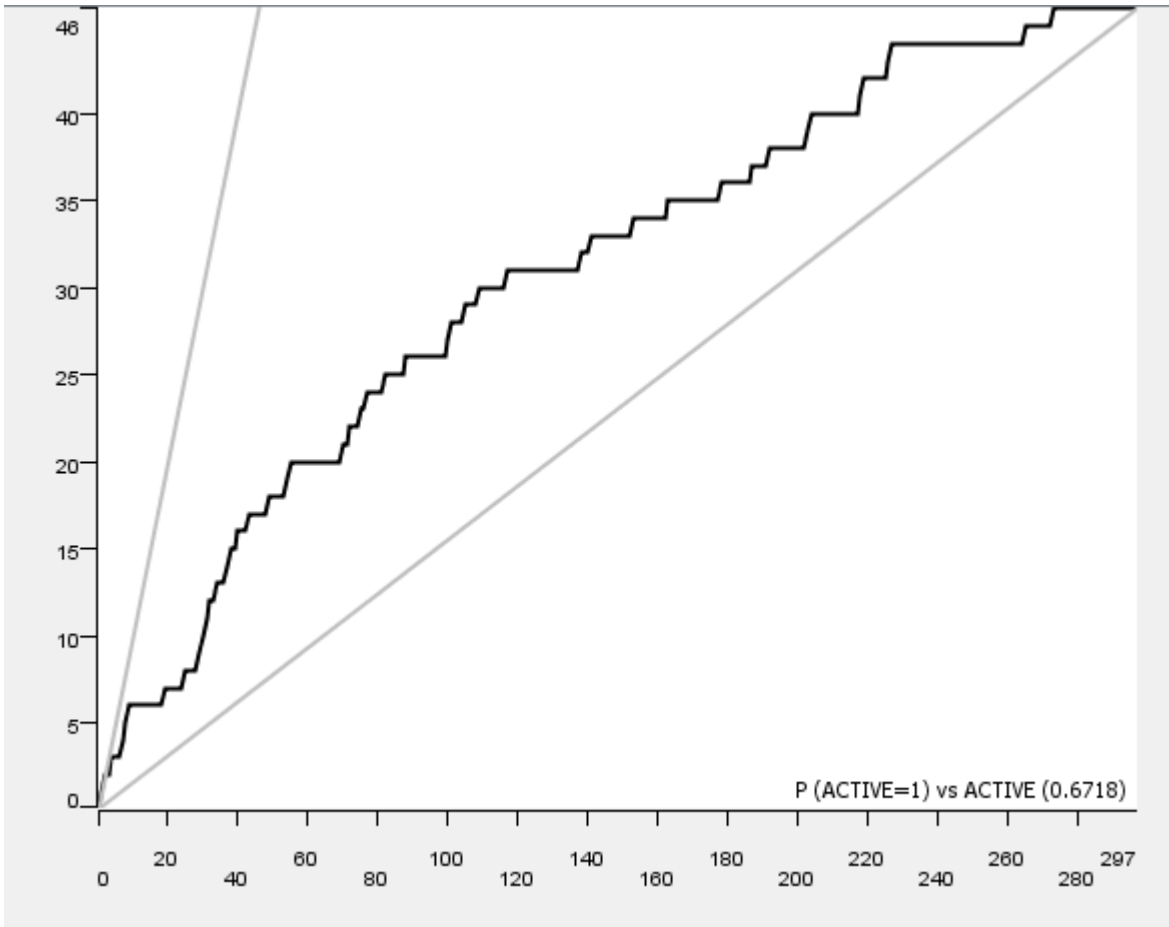

|          | Predicted Active | Predicted Inactive |
|----------|------------------|--------------------|
| Active   | 15               | 31                 |
| Inactive | 23               | 228                |

<10nM DefGood in aurora B, 25% error;  
Random seed = 121783

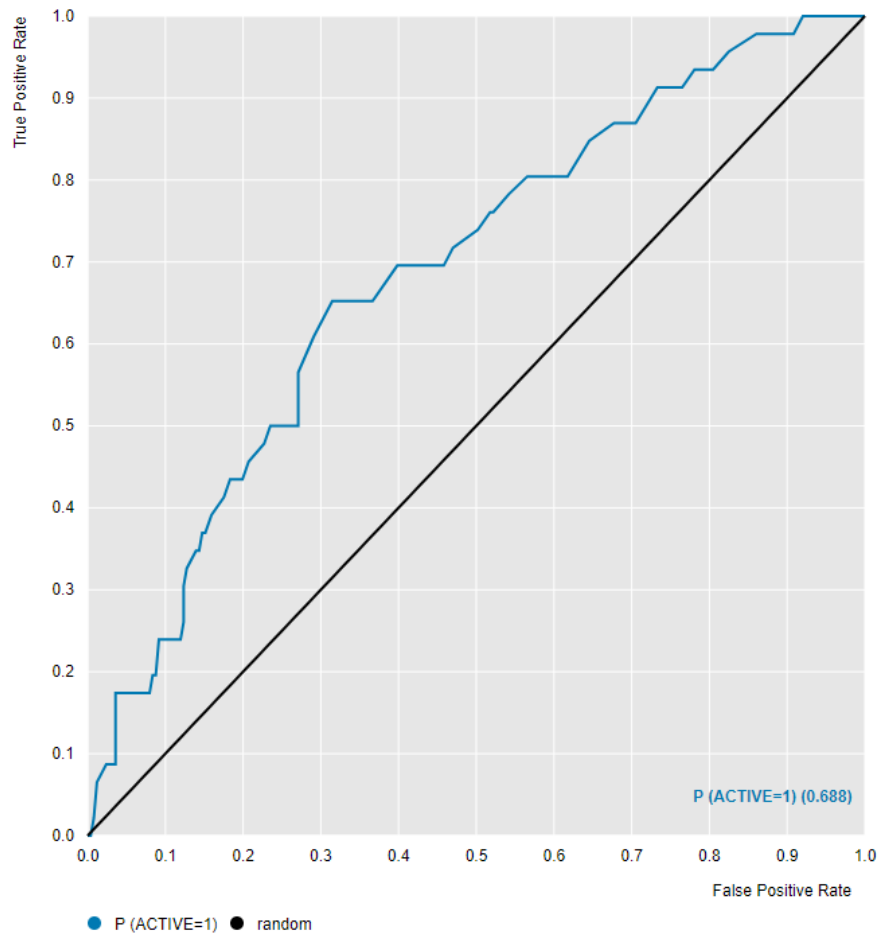

N=297

| Top 10% Mean IC50 | 1,980 nM |
|-------------------|----------|
|-------------------|----------|

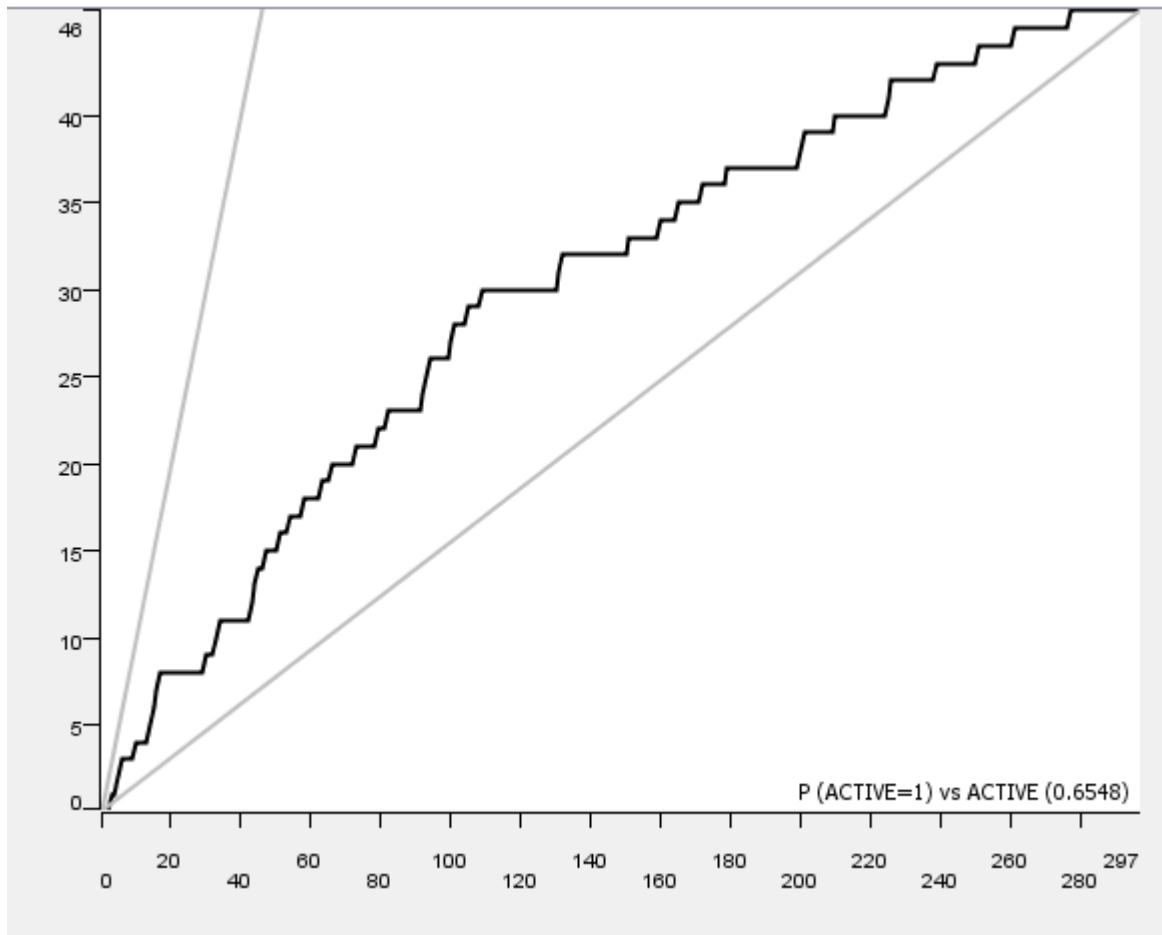

|          | Predicted Active | Predicted Inactive |
|----------|------------------|--------------------|
| Active   | 14               | 32                 |
| Inactive | 31               | 220                |

# Conclusion - RF

- A Random Forrest could be generated for aurora B kinase with a decision value of  $<10$  nM as defined as active. The predictivity of the algorithm could be preserved in three random train/test cycles as error was introduced in the training set. The point of failure was 20%, 20% and 25% error.



# Conclusion - PNN

- Not done due to early failure on control set

# $\beta$ 2 Adrenergic Receptor

# β2 Adrenergic Receptor NBN Design

- Rules - \$RELATION\$ = "=" OR \$IC50\$ > 999 OR \$IC50\$ < 10 => TRUE
- Sort ascending and remove duplicates
- DefGood scanned between 5 and 25 nM
- 80-20 split for both actives and inactives
- NBN – ECFP4 used Classifier where Prediction was Active = True
- Resulted in 641 compounds after cleaning the data

# <5 nM DefGood in beta-adren

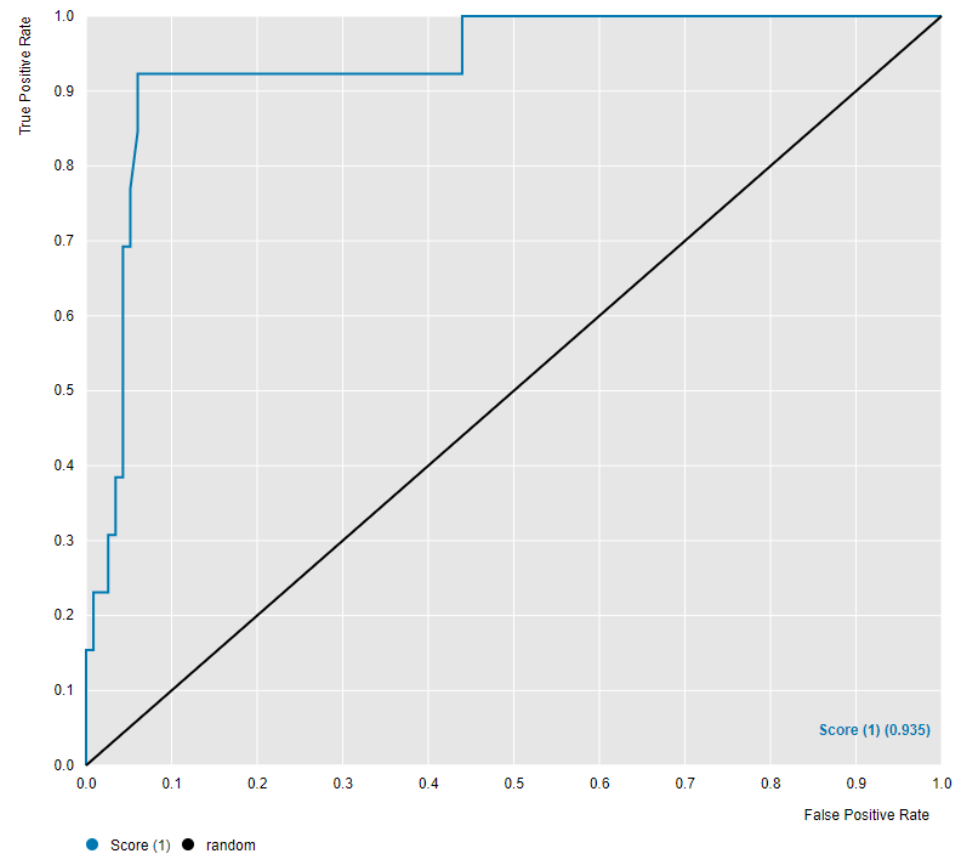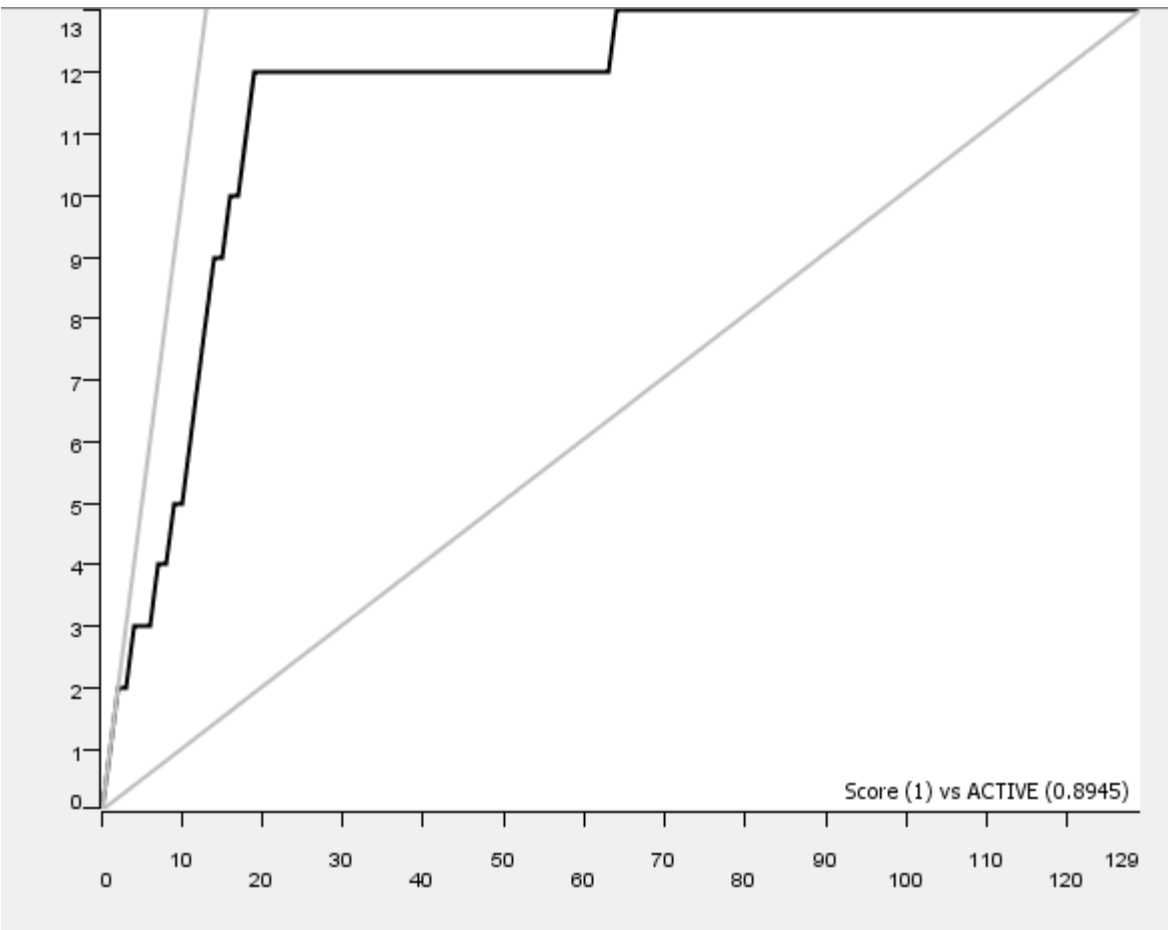

N=129

|                      |         |
|----------------------|---------|
| Top 10% Mean<br>IC50 | 63.0 nM |
|----------------------|---------|

|          | Predicted Active | Predicted Inactive |
|----------|------------------|--------------------|
| Active   | 12               | 1                  |
| Inactive | 11               | 105                |

# <10 nM DefGood in beta-adren

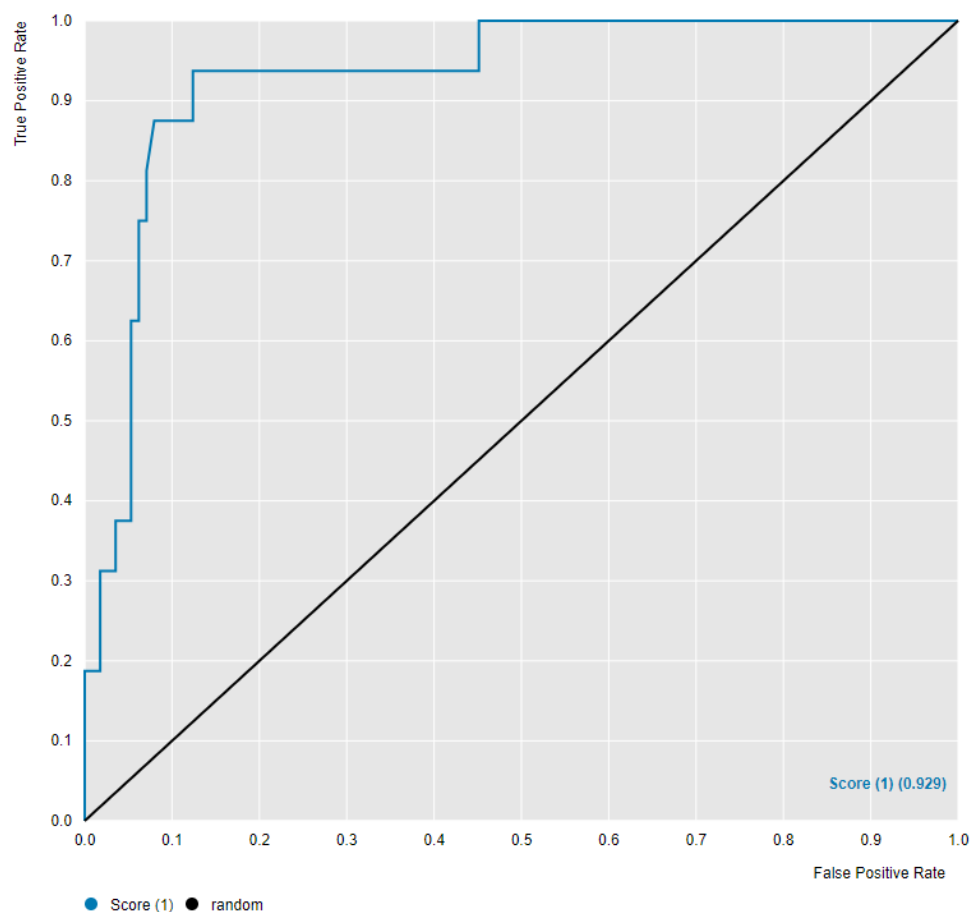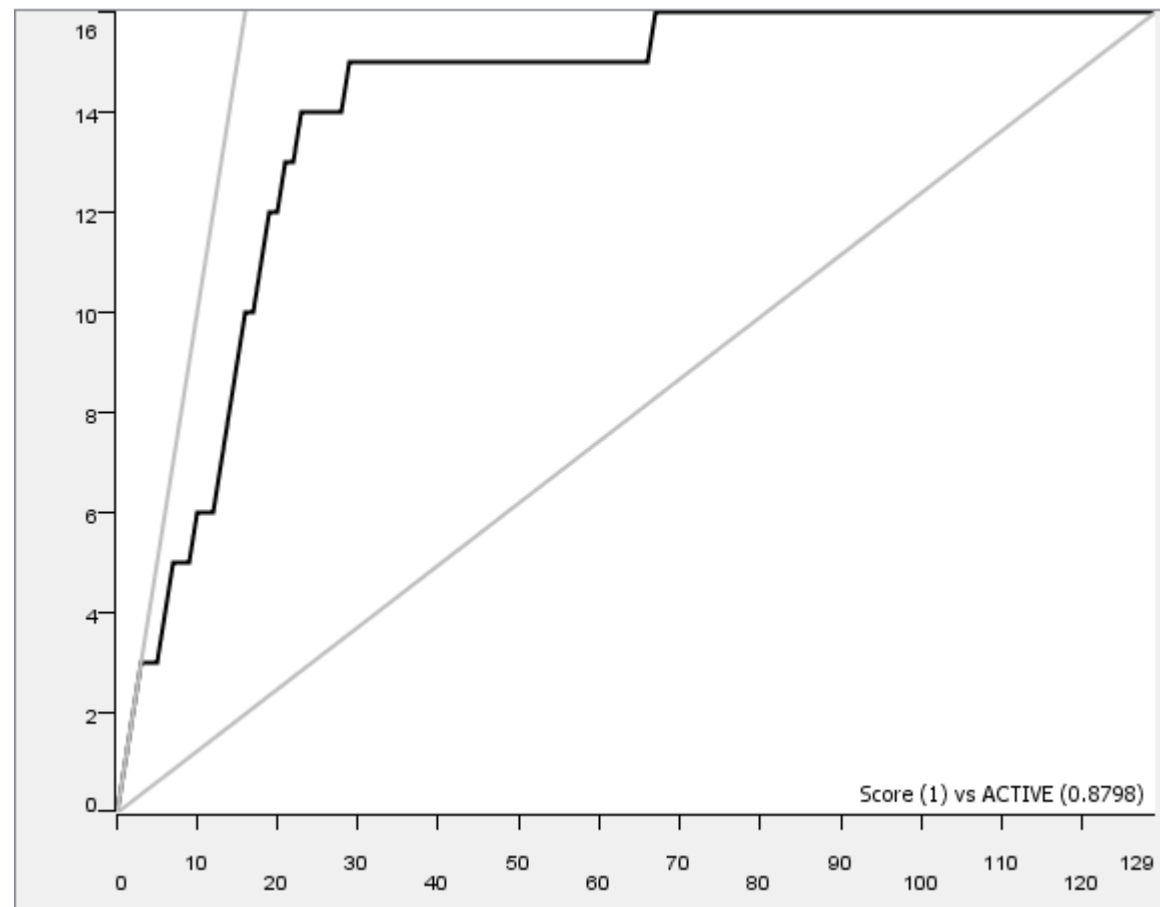

N=129

Top 10% Mean  
IC50

33.7 nM

|          | Predicted Active | Predicted Inactive |
|----------|------------------|--------------------|
| Active   | 15               | 1                  |
| Inactive | 17               | 96                 |

# <15 nM DefGood in beta-adren

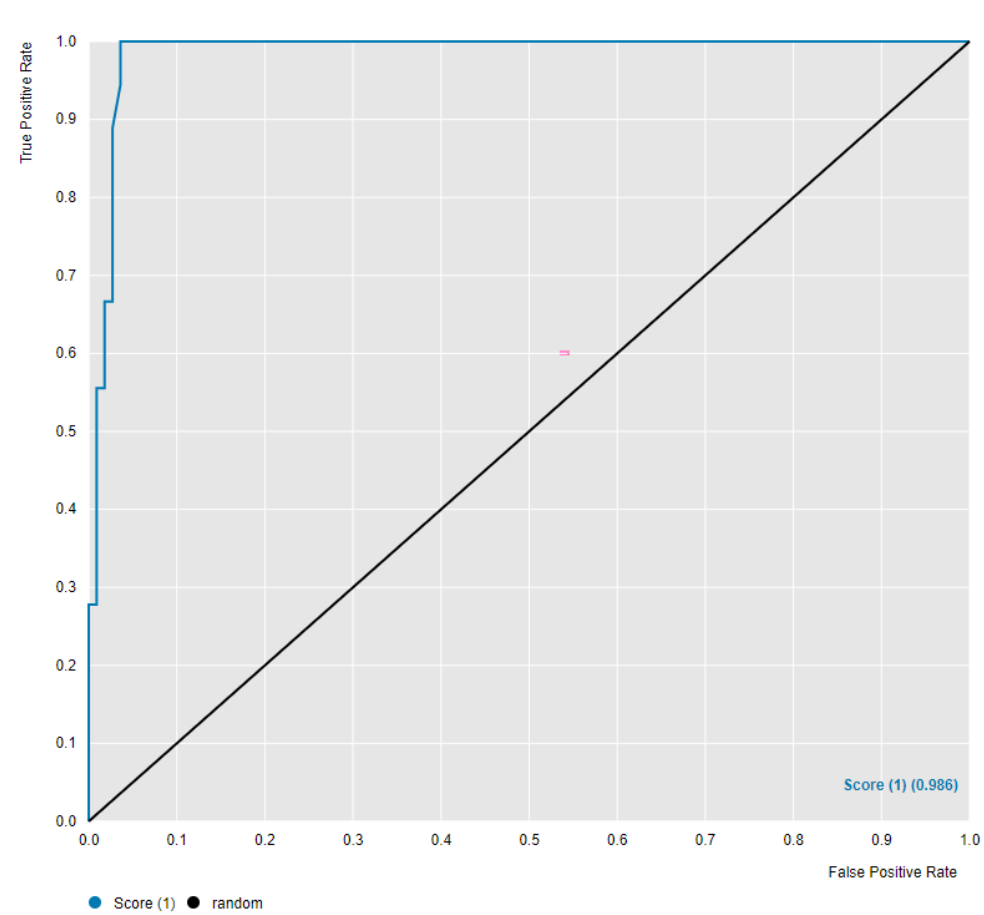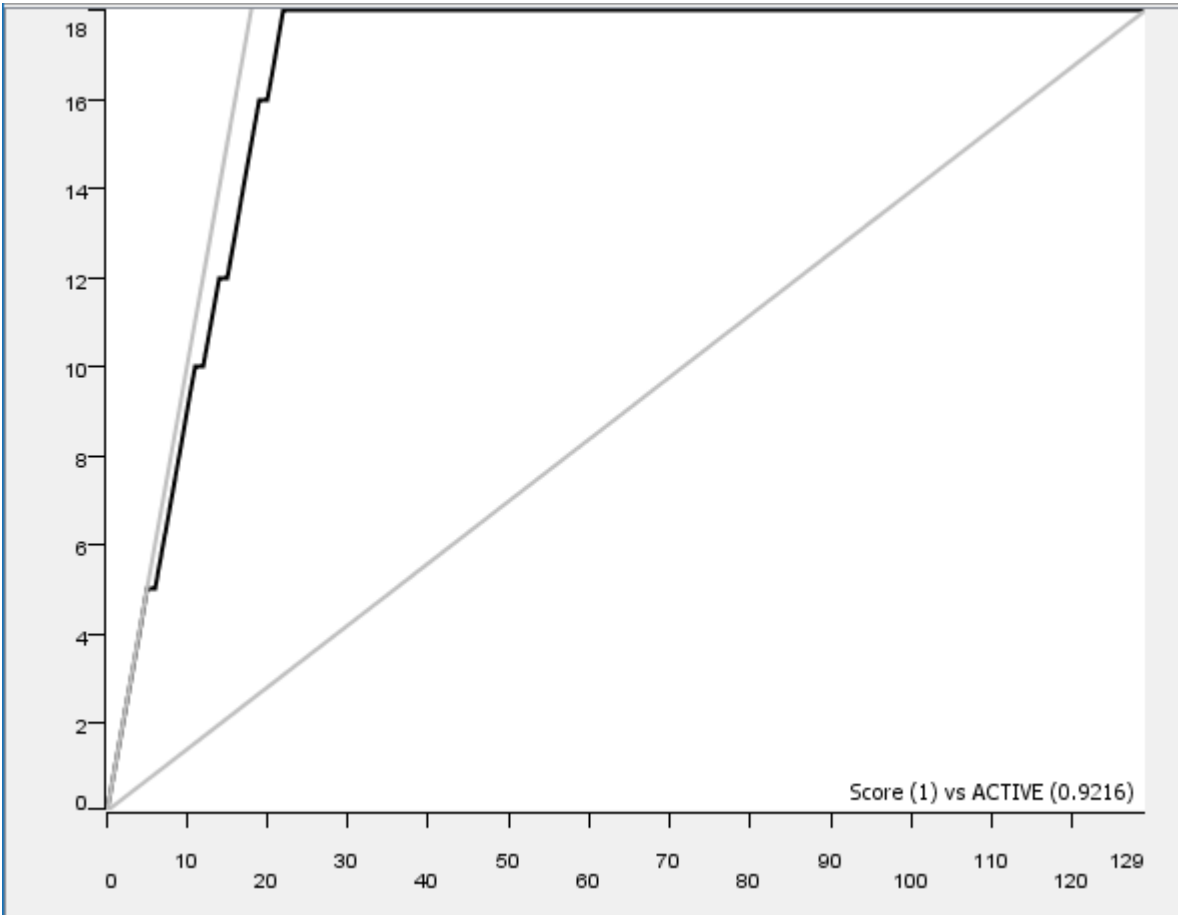

N=129

|                      |         |
|----------------------|---------|
| Top 10% Mean<br>IC50 | 21.7 nM |
|----------------------|---------|

|          | Predicted Active | Predicted Inactive |
|----------|------------------|--------------------|
| Active   | 18               | 0                  |
| Inactive | 9                | 102                |

# <20 nM DefGood in beta-adren

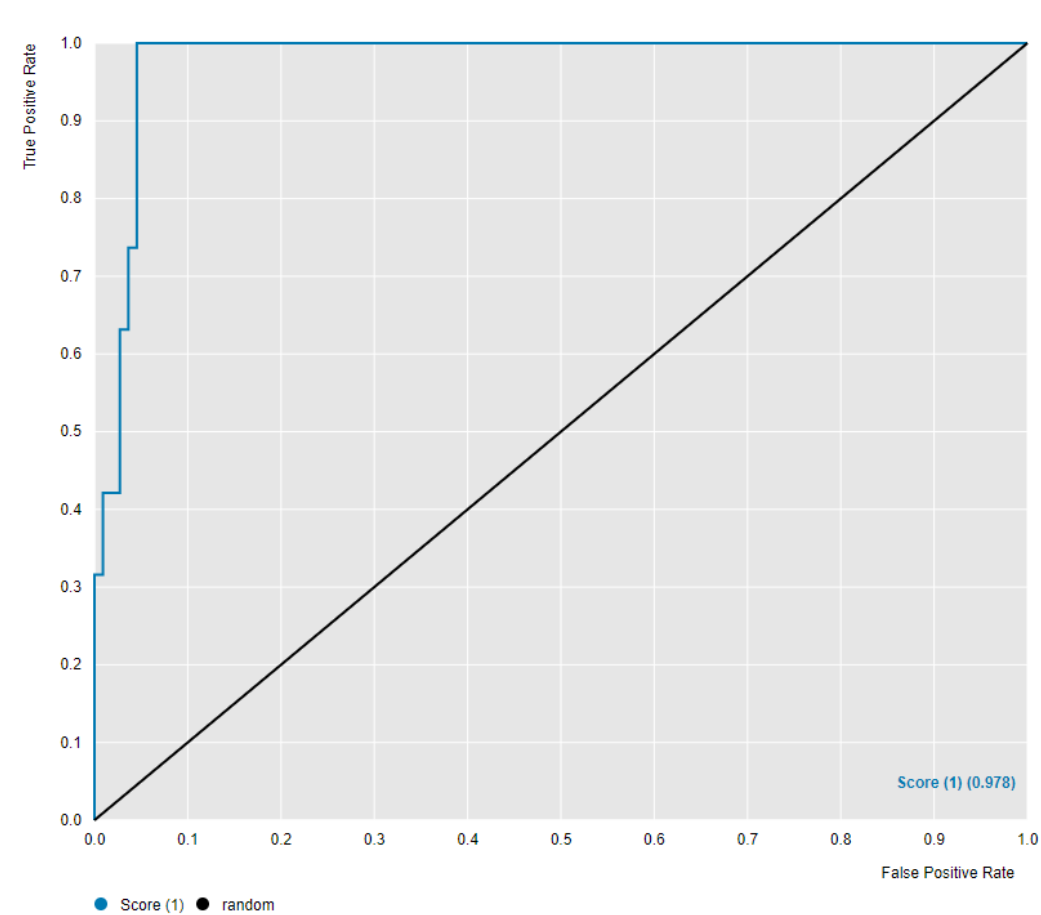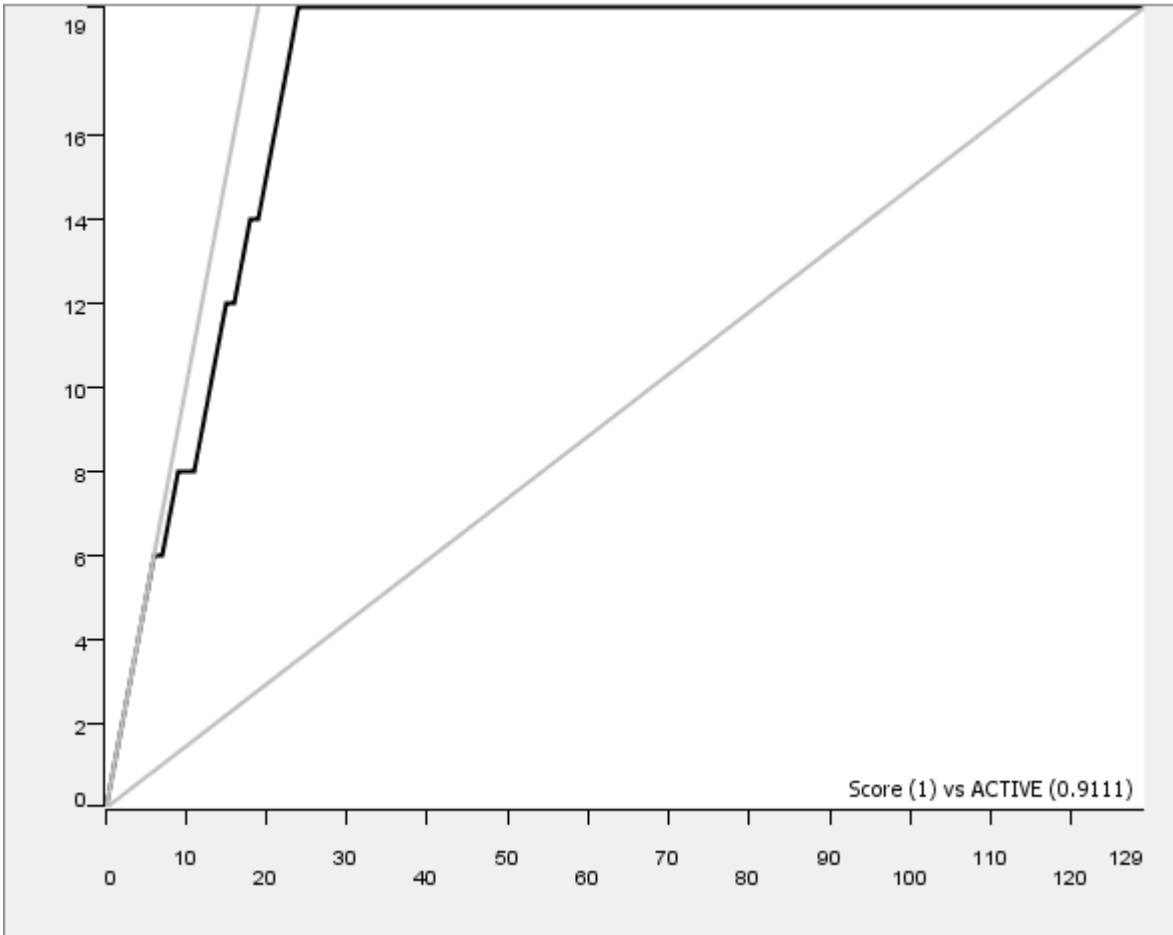

N=129

|                      |         |
|----------------------|---------|
| Top 10% Mean<br>IC50 | 32.2 nM |
|----------------------|---------|

|          | Predicted Active | Predicted Inactive |
|----------|------------------|--------------------|
| Active   | 19               | 0                  |
| Inactive | 15               | 95                 |

# <25 nM DefGood in beta-adren

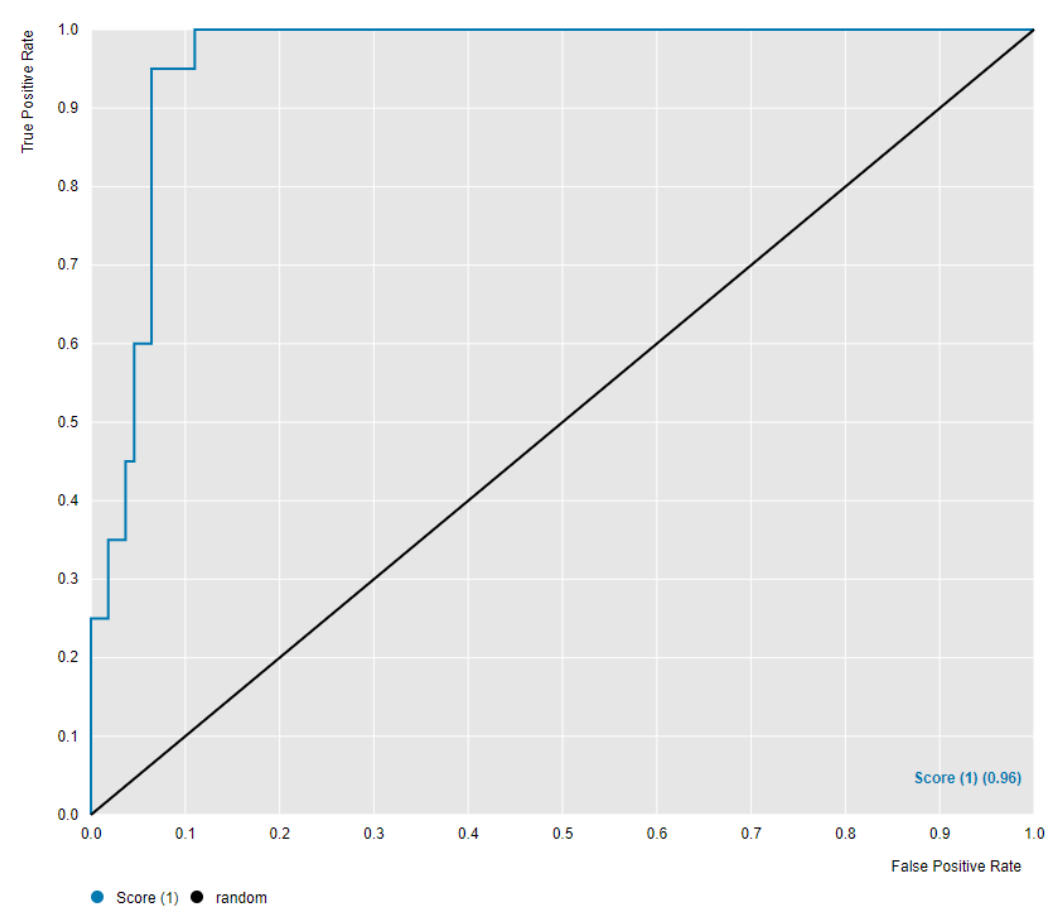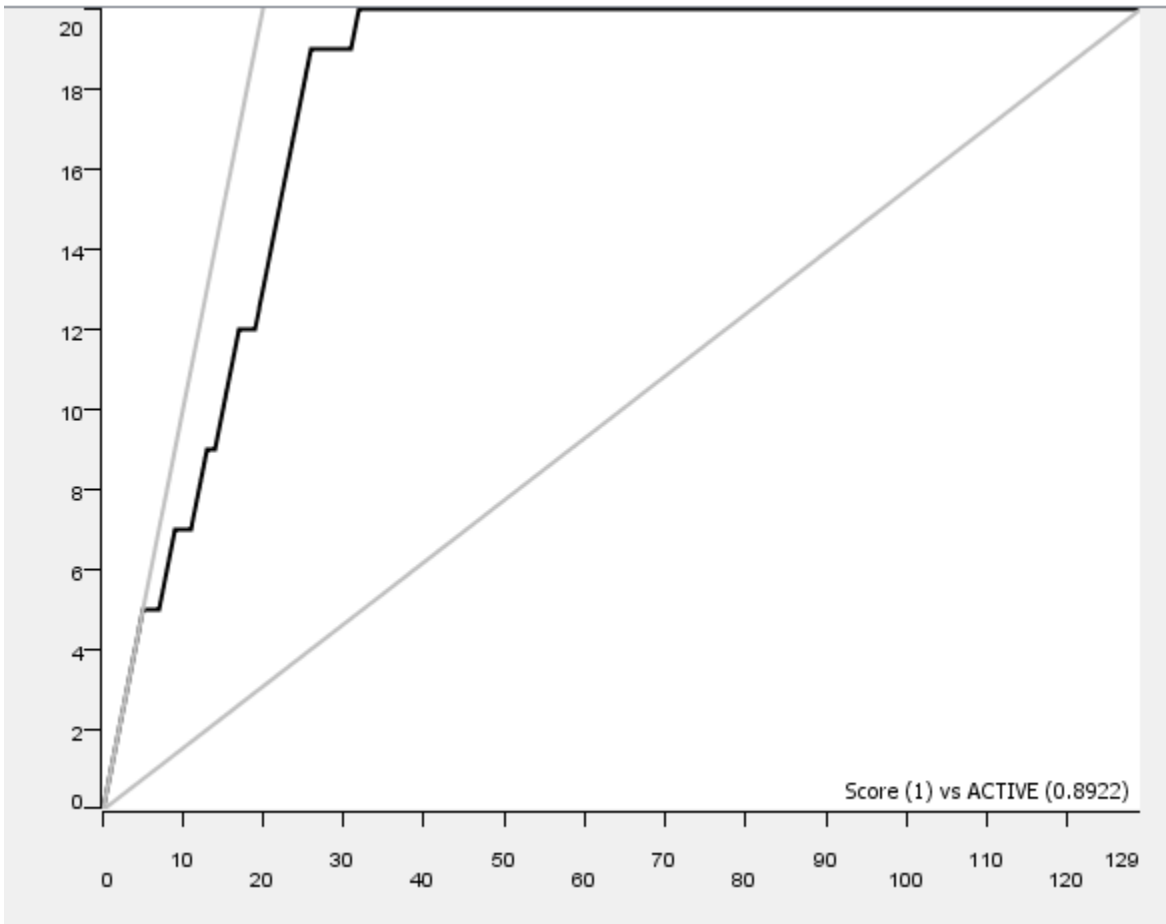

N=129

|                   |         |
|-------------------|---------|
| Top 10% Mean IC50 | 37.1 nM |
|-------------------|---------|

|          | Predicted Active | Predicted Inactive |
|----------|------------------|--------------------|
| Active   | 19               | 1                  |
| Inactive | 10               | 99                 |



# Decision on DefGood

- <15 nM has the best performance overall by far.

# RF - <15 nM DefGood in beta-adren

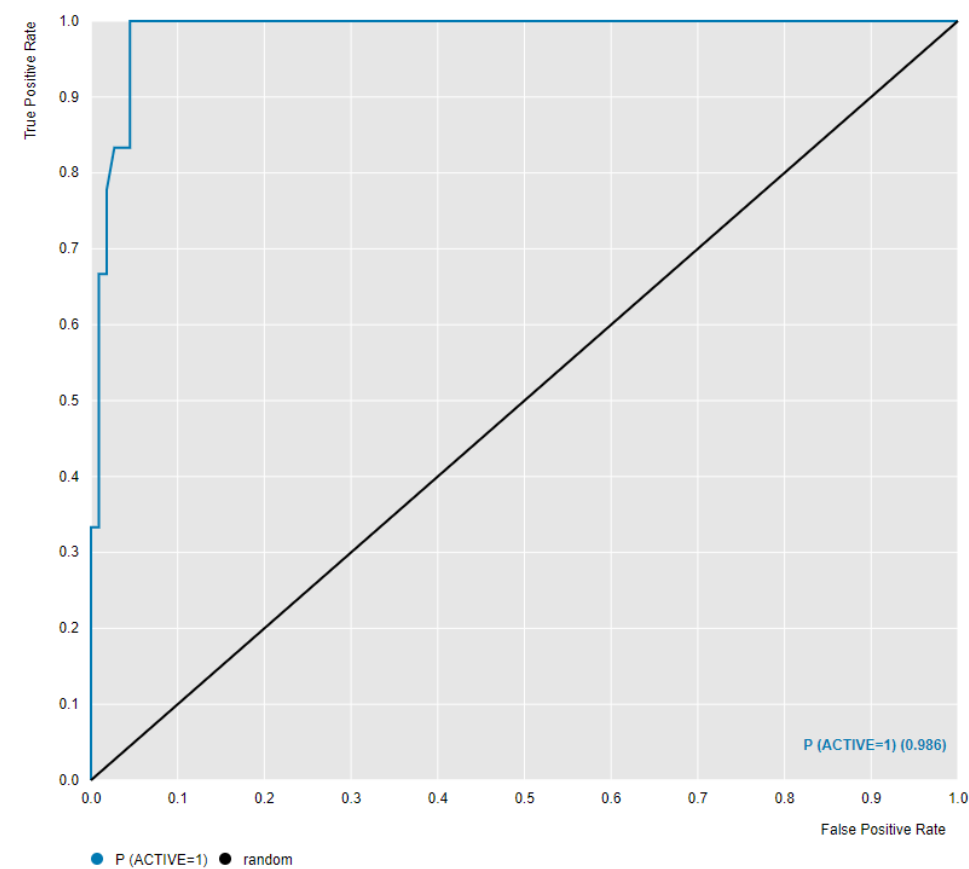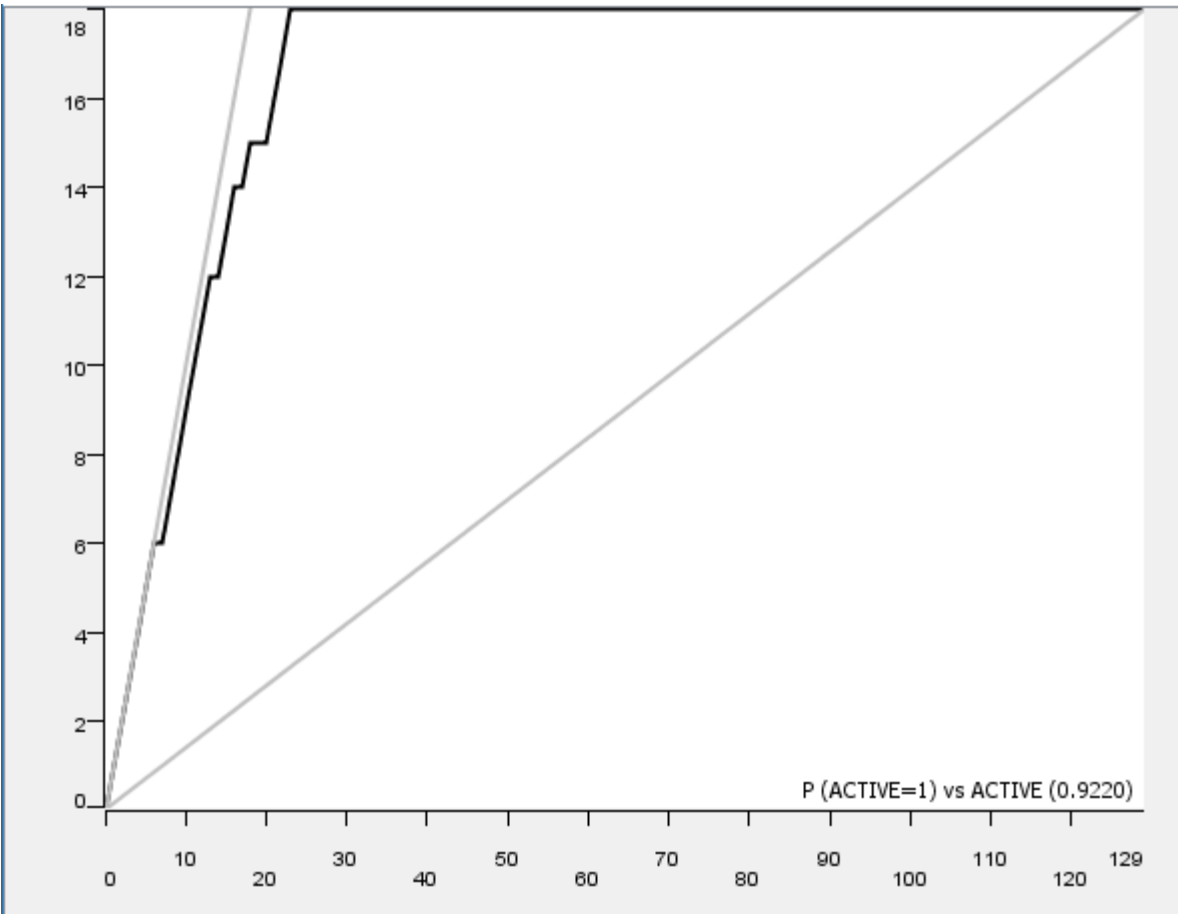

N=129

|                   |        |
|-------------------|--------|
| Top 10% Mean IC50 | 3.8 nM |
|-------------------|--------|

|          | Predicted Active | Predicted Inactive |
|----------|------------------|--------------------|
| Active   | 15               | 3                  |
| Inactive | 3                | 108                |

# Decision on DefGood - RF

- Work in ALK showed DefGood in the NBN was similar to DefGood in an RF. Therefore, this value for DefGood from the NBN design was used as DefGood.

# PNN - <15 nM DefGood in beta-adren

- Properties List (46 calculatable properties were used)
- Parameterization (Global Accuracy for Activity at a 15 nM decision value was used, and a 5-fold stratified sampling cross validation was used to parameterize theta minus and theta plus) Theta Minus = 0.05 and Theta Plus = 0.25

# PNN - <15 nM DefGood in beta-adren

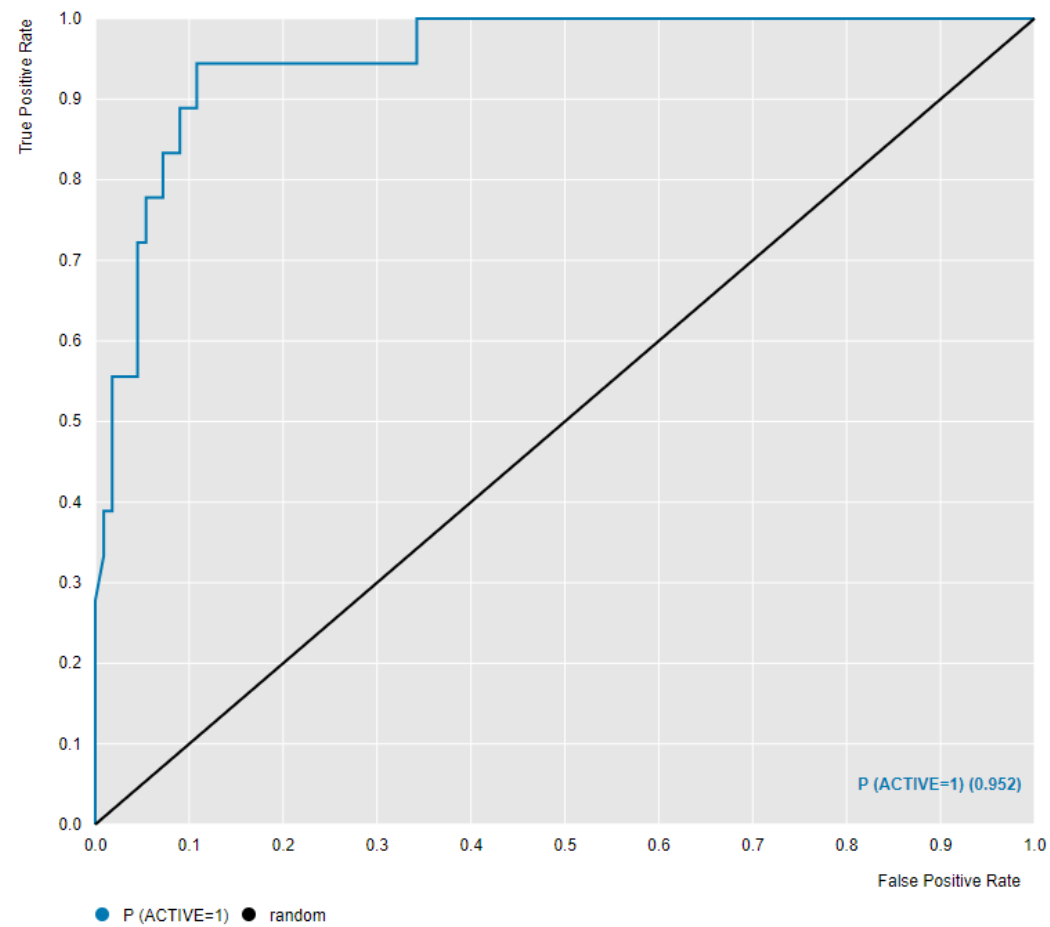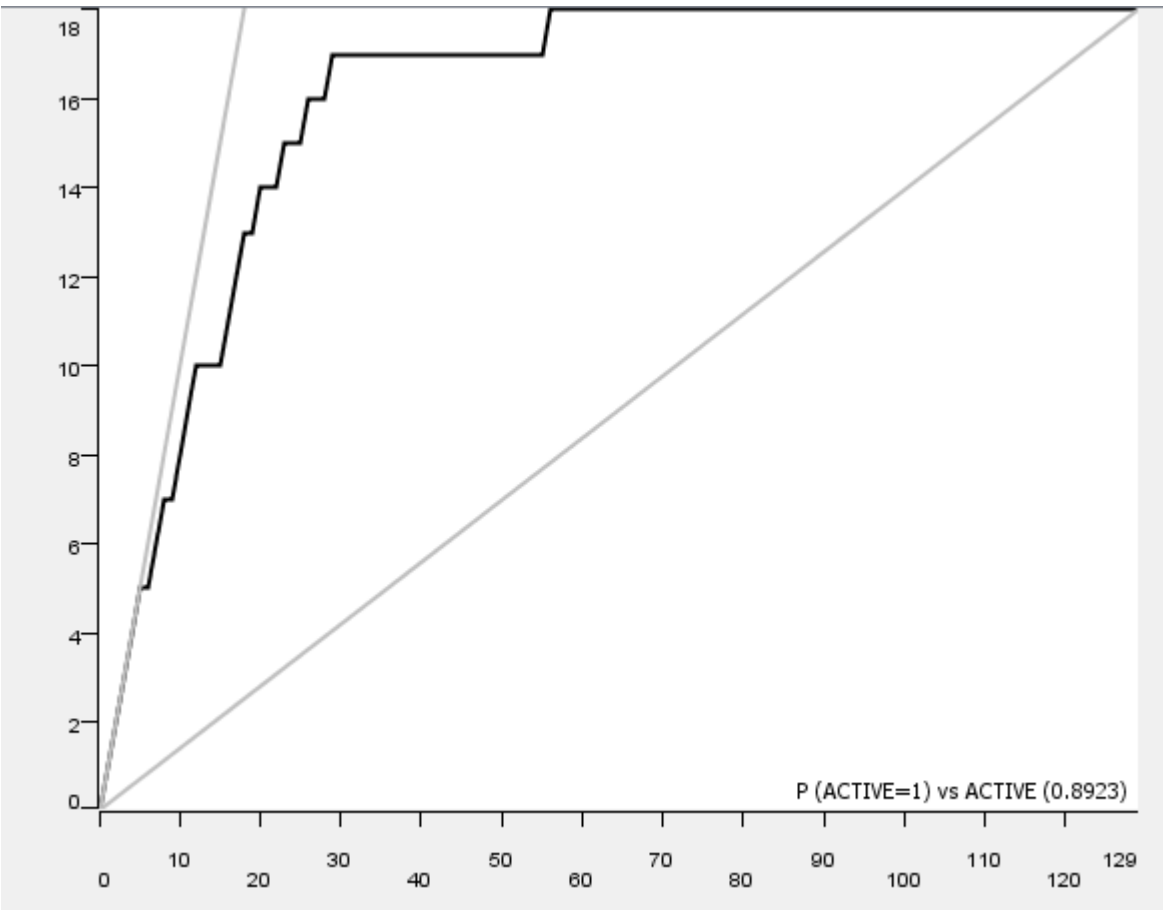

N=129

|                   |         |
|-------------------|---------|
| Top 10% Mean IC50 | 13.1 nM |
|-------------------|---------|

|          | Predicted Active | Predicted Inactive |
|----------|------------------|--------------------|
| Active   | 9                | 9                  |
| Inactive | 2                | 109                |

# Decision on DefGood - PNN

- In ALK, the DefGood for a PNN mirrored those of the RF and the NBN. Therefore, DefGood from the NBN was used as DefGood for the PNN. Parameterization for each model adds significant time to the process. A rough benchmark can be applied where point of failure is discovered and then the model is parameterized to ensure that the situation is optimal for the PNN. This will be applied to the discovery of the error tolerance threshold for the PNN in the beta 2 adrenergic receptor space.

NBN Error Tolerance- <15 nM DefGood in  
beta-adren

- 0-50% absolute error

<15 nM DefGood in beta-adren, 5% error;  
Random seed = 1515533876005

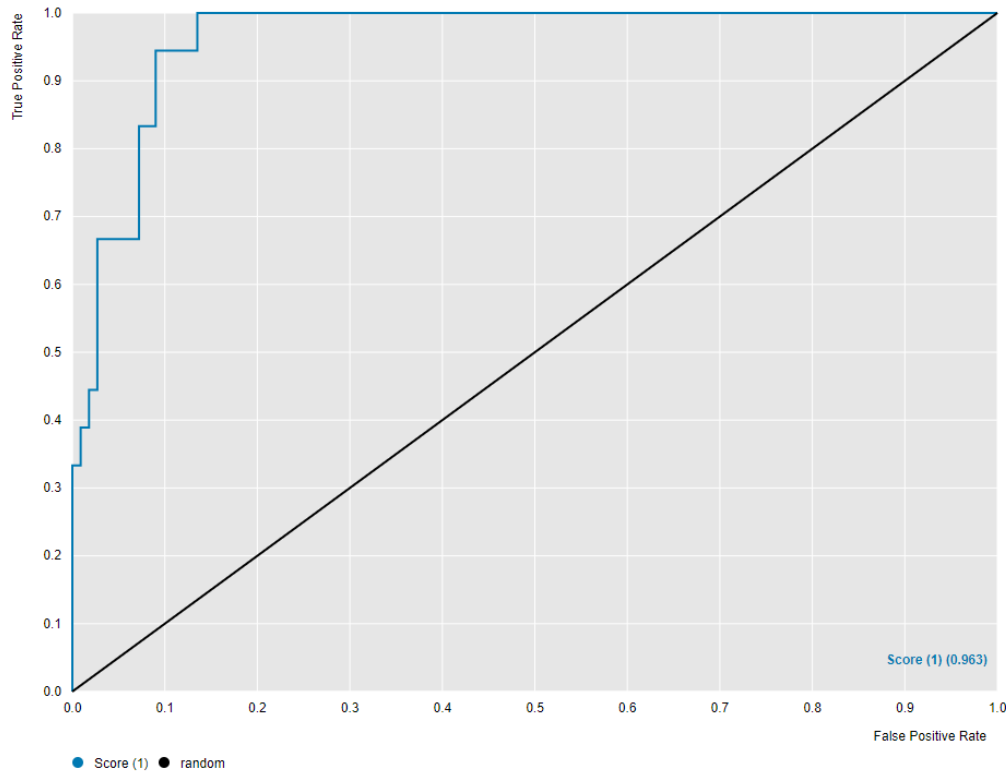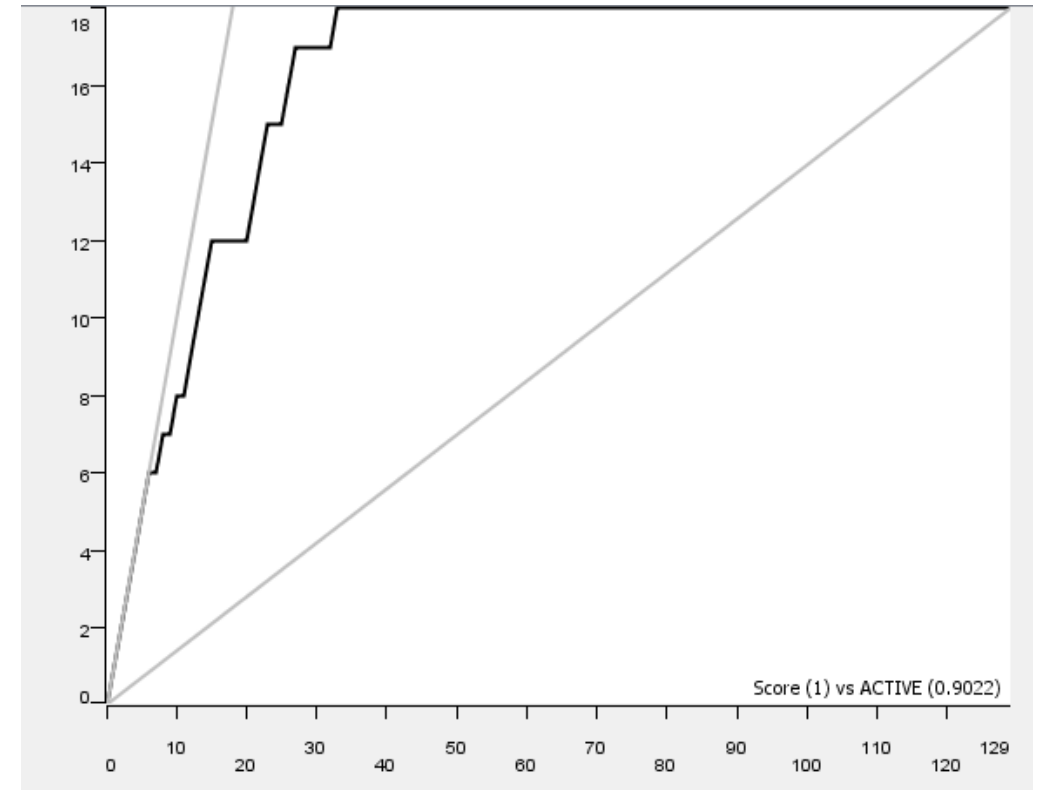

N=129

| Top 10% Mean<br>IC50 | 24.5 nM |
|----------------------|---------|
|----------------------|---------|

|          | Predicted Active | Predicted Inactive |
|----------|------------------|--------------------|
| Active   | 12               | 6                  |
| Inactive | 8                | 103                |



# <15nM DefGood in beta-adren, 10% error

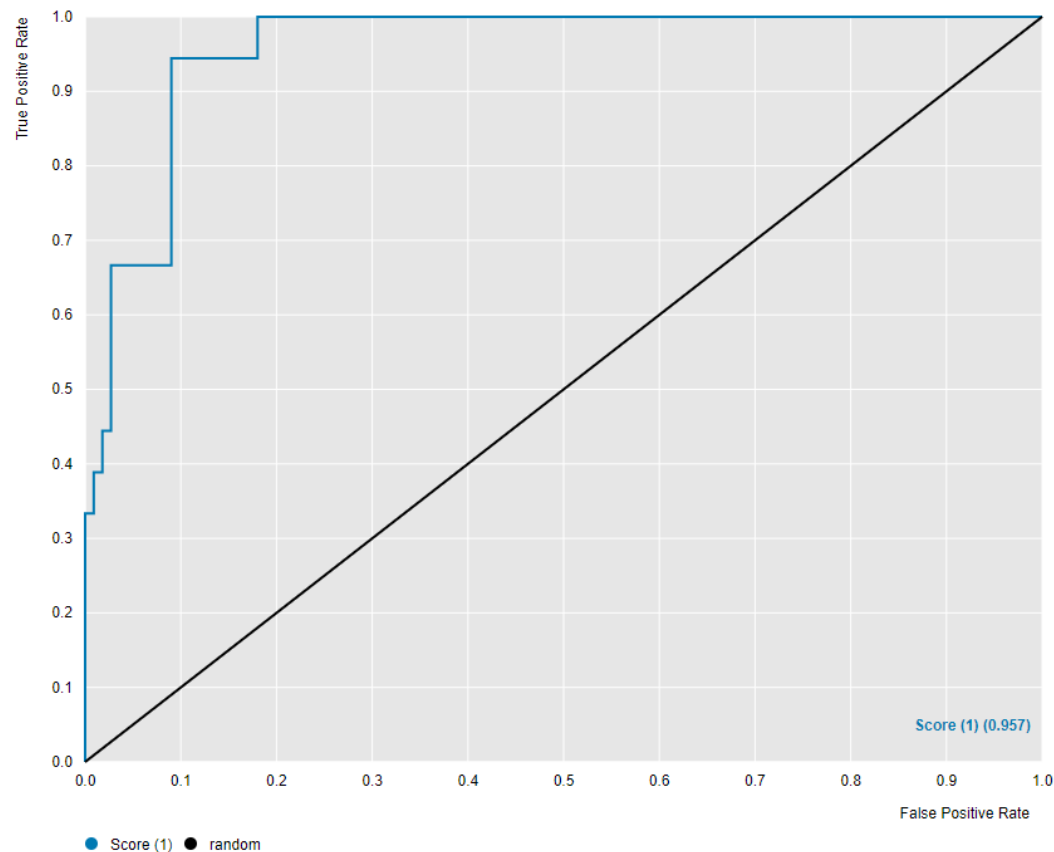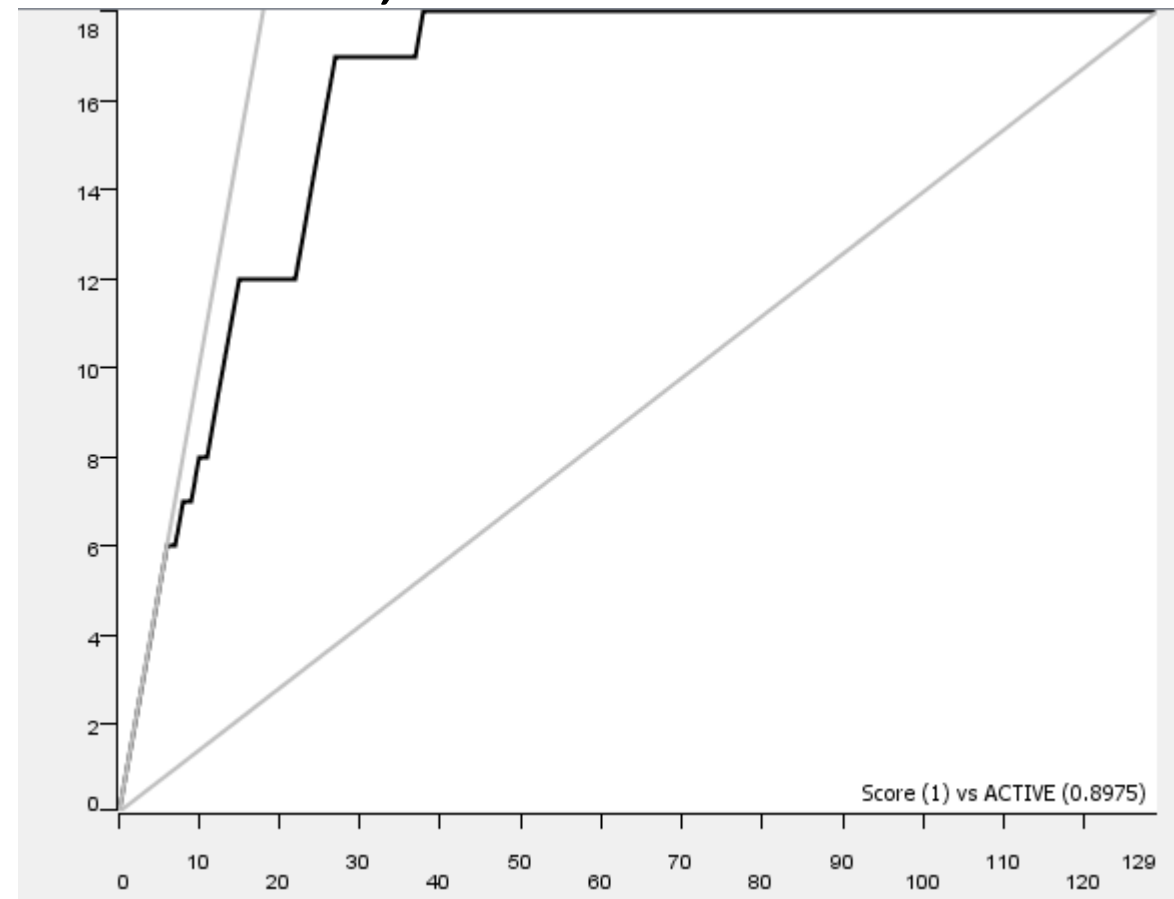

N=129

| Top 10% Mean IC50 | 24.5 nM |
|-------------------|---------|
|-------------------|---------|

|          | Predicted Active | Predicted Inactive |
|----------|------------------|--------------------|
| Active   | 12               | 6                  |
| Inactive | 8                | 103                |

# <15nM DefGood in beta-adren, 15% error

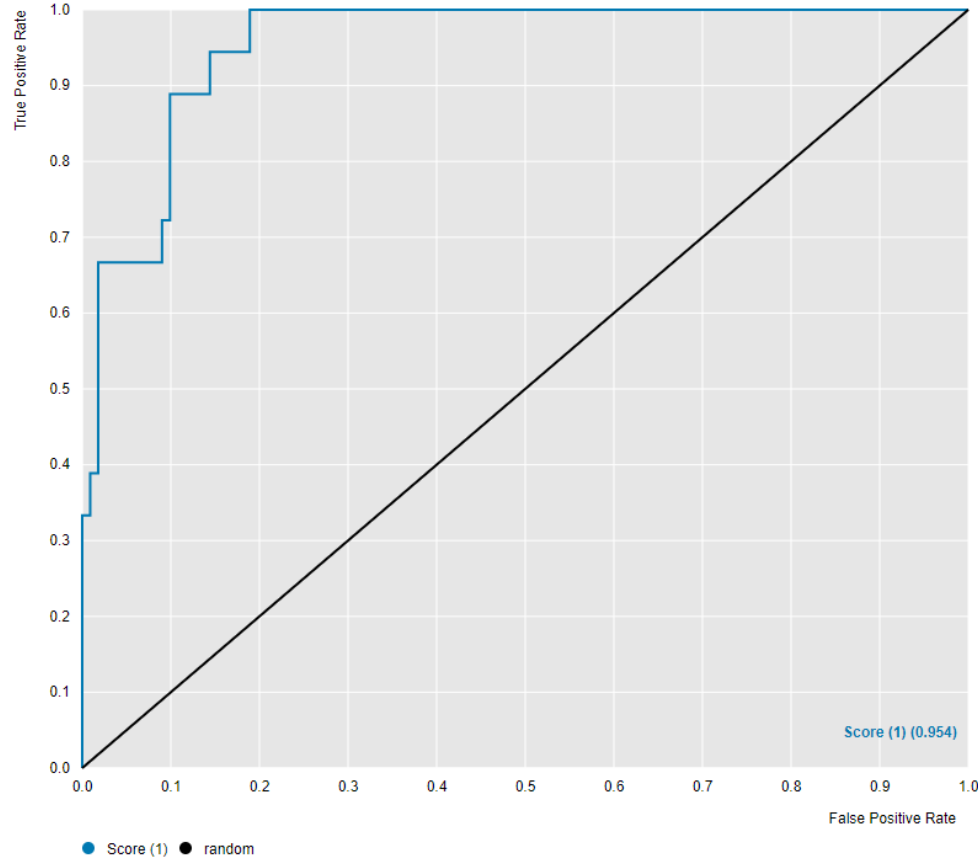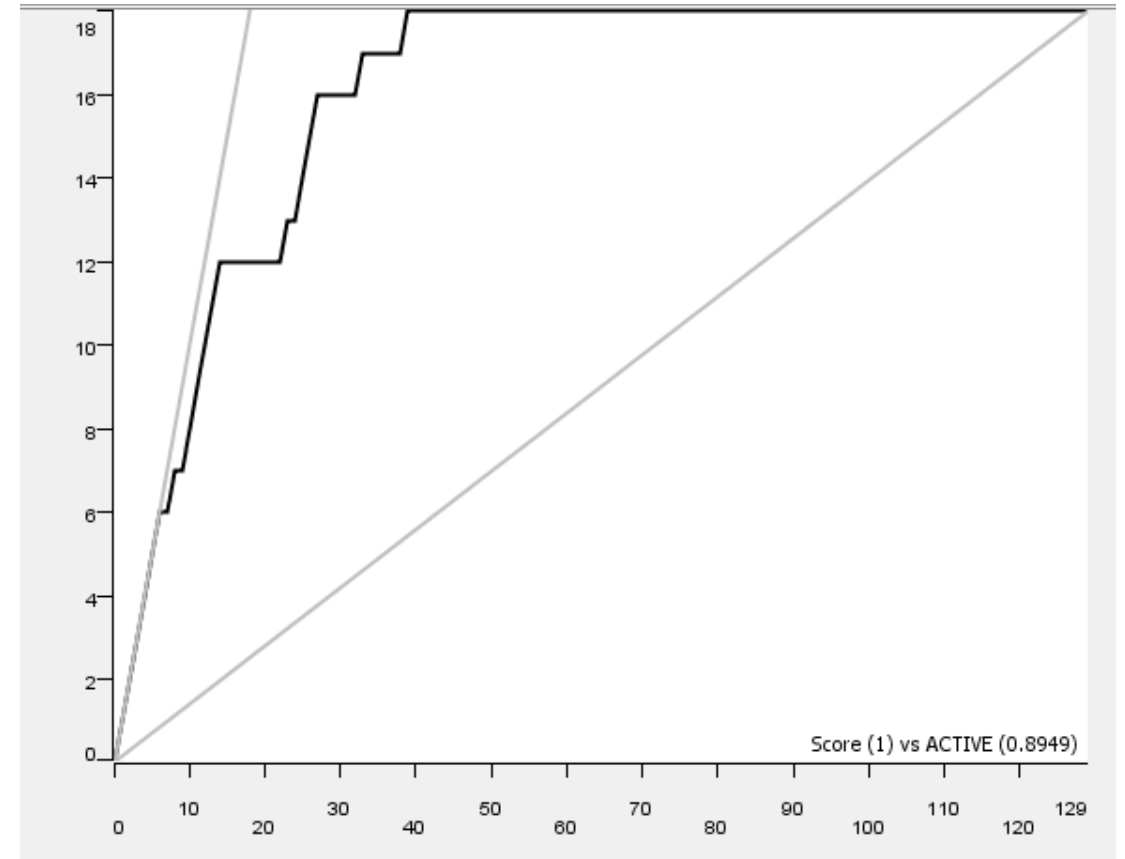

N=129

|                      |         |
|----------------------|---------|
| Top 10% Mean<br>IC50 | 21.9 nM |
|----------------------|---------|

|          | Predicted Active | Predicted Inactive |
|----------|------------------|--------------------|
| Active   | 16               | 2                  |
| Inactive | 12               | 99                 |

# <15nM DefGood in beta-adren, 20% error

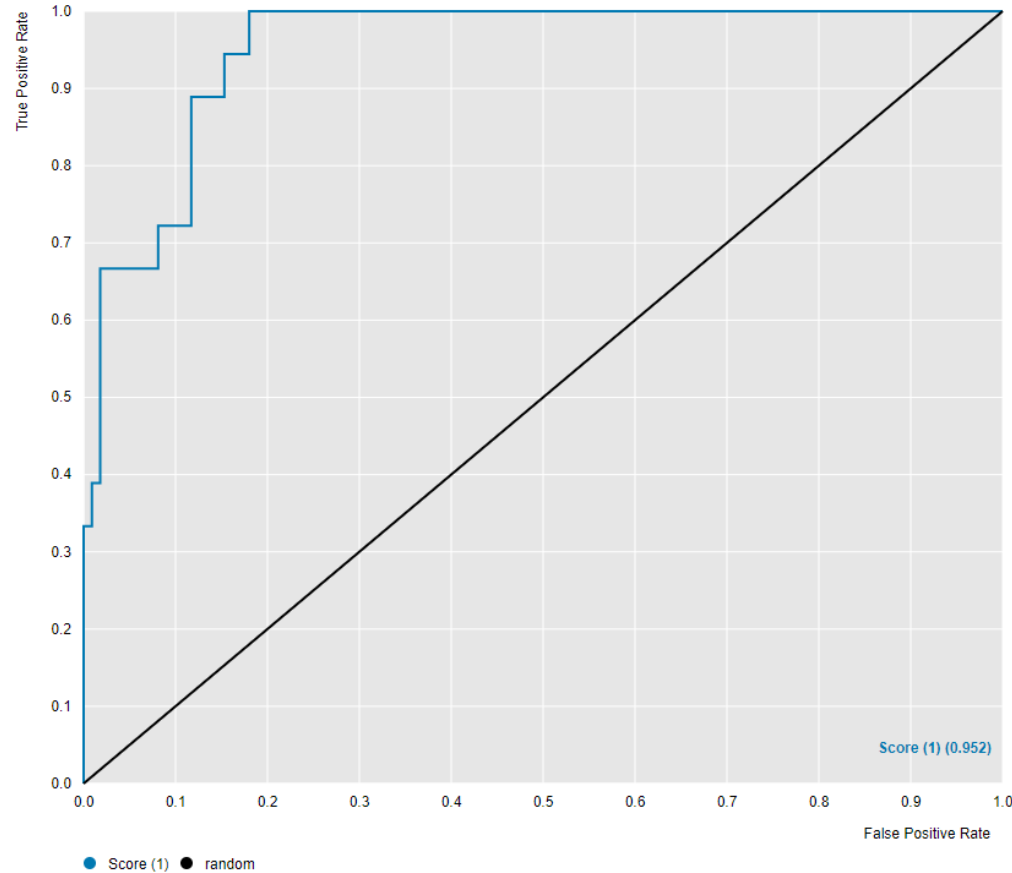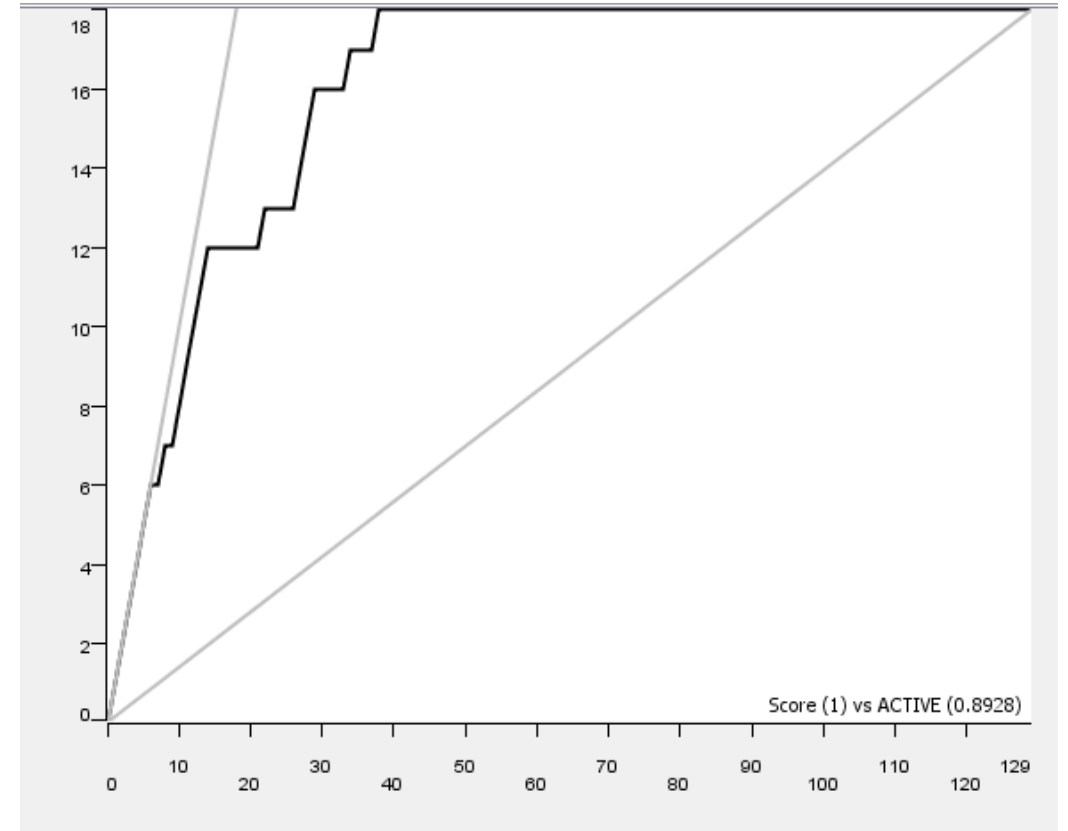

N=129

| Top 10% Mean IC50 | 21.1 nM |
|-------------------|---------|
|-------------------|---------|

|          | Predicted Active | Predicted Inactive |
|----------|------------------|--------------------|
| Active   | 13               | 5                  |
| Inactive | 11               | 100                |

# <15nM DefGood in beta-adren, 30% error

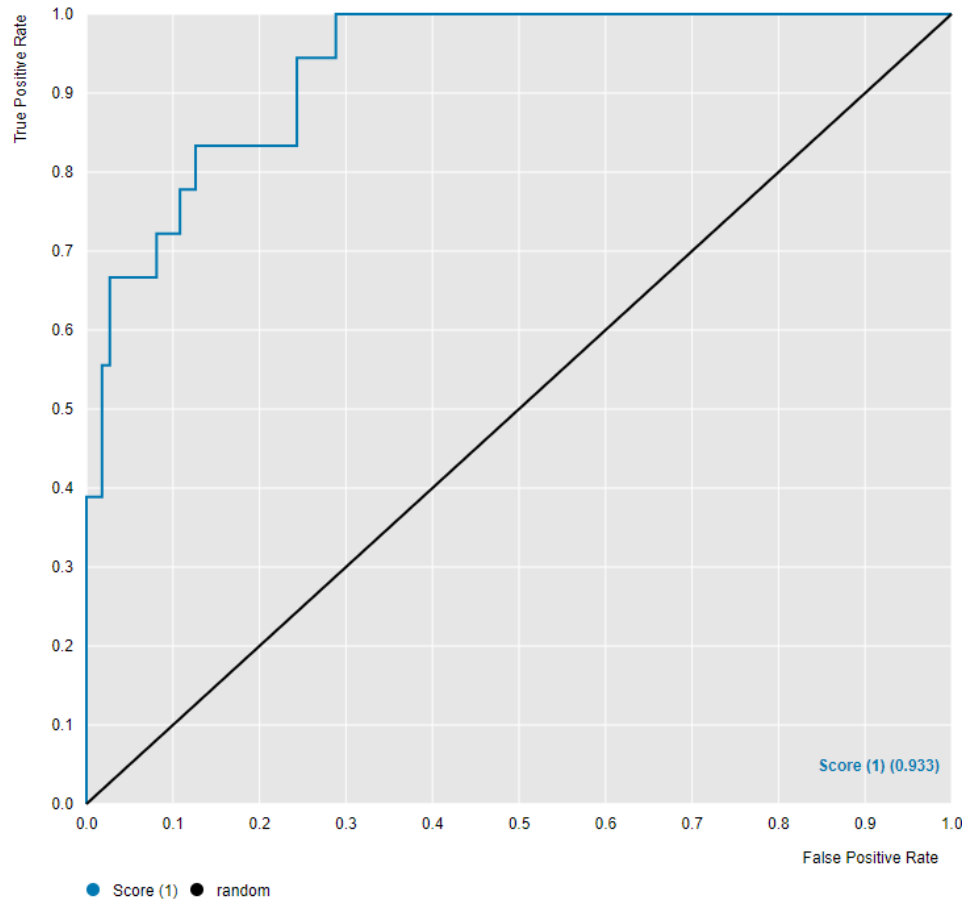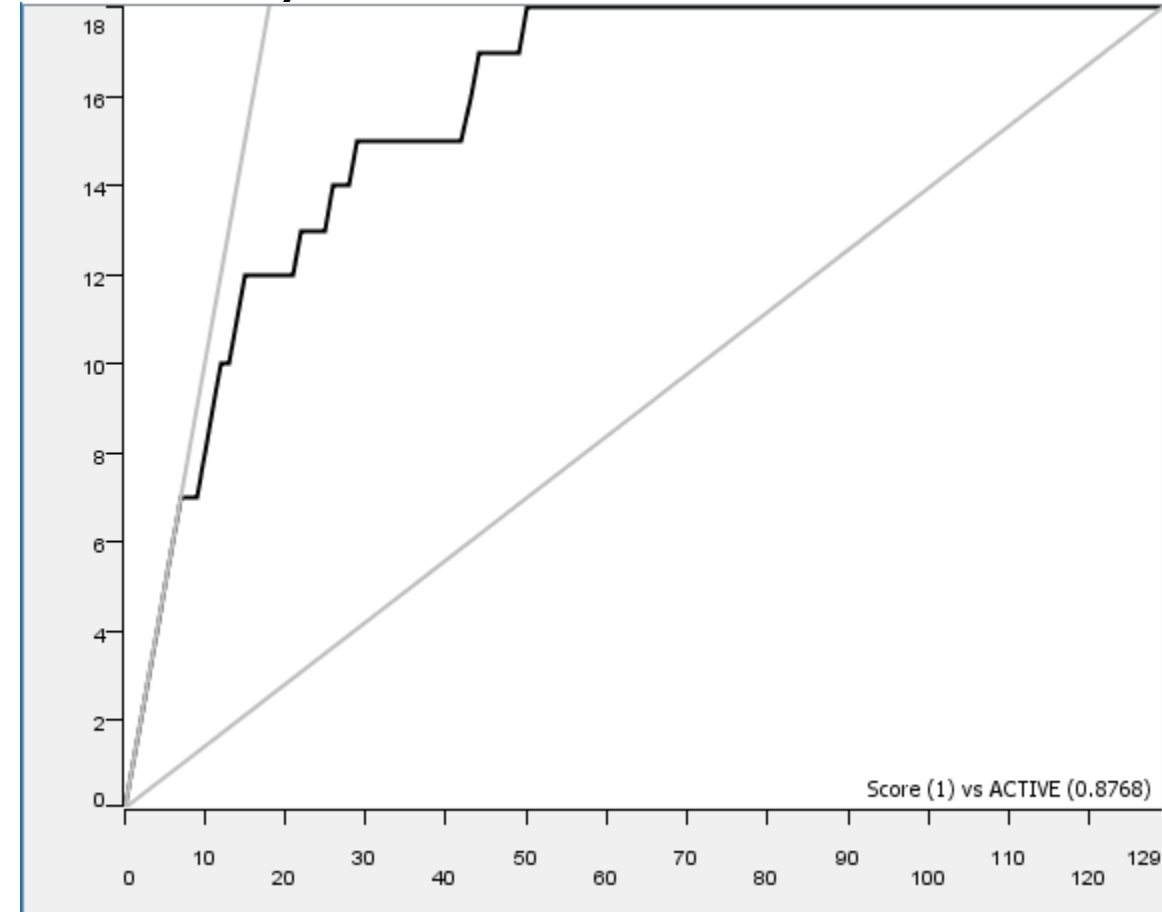

N=129

| Top 10% Mean IC50 | 21.9 nM |
|-------------------|---------|
|-------------------|---------|

|          | Predicted Active | Predicted Inactive |
|----------|------------------|--------------------|
| Active   | 13               | 5                  |
| Inactive | 11               | 100                |

# <15nM DefGood in beta-adren, 40% error

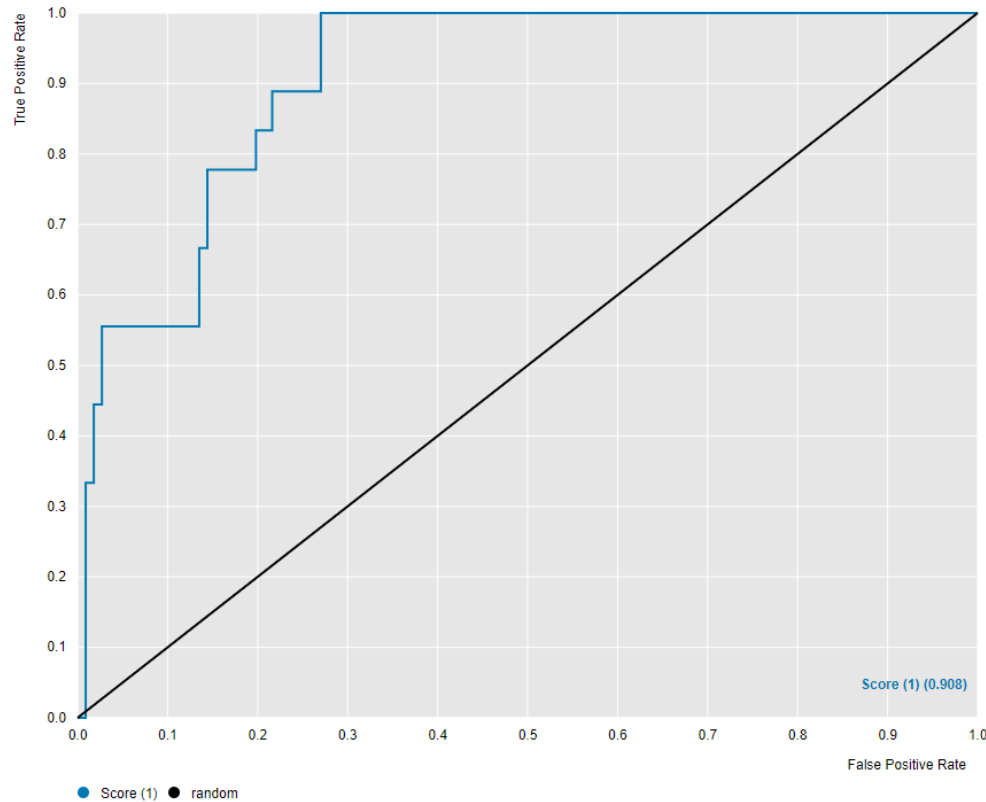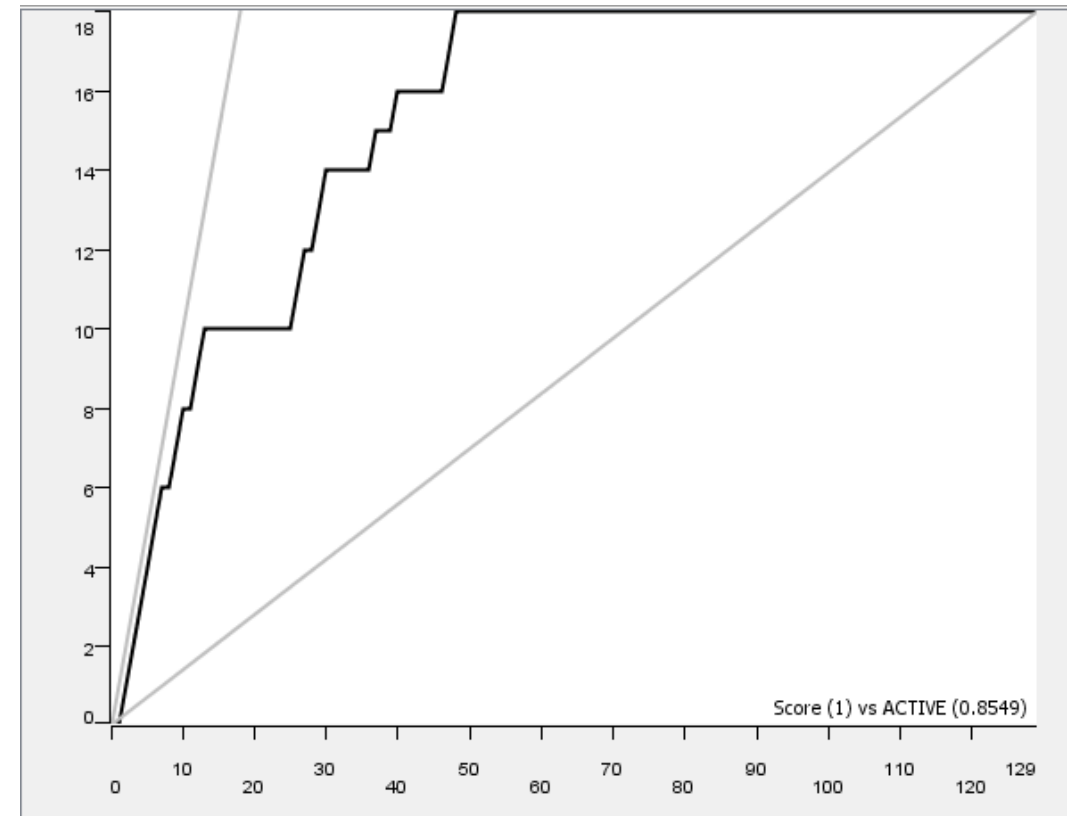

N=129

|                      |         |
|----------------------|---------|
| Top 10% Mean<br>IC50 | 24.5 Nm |
|----------------------|---------|

|          | Predicted Active | Predicted Inactive |
|----------|------------------|--------------------|
| Active   | 10               | 8                  |
| Inactive | 6                | 105                |

# <15nM DefGood in beta-adren, 45% error

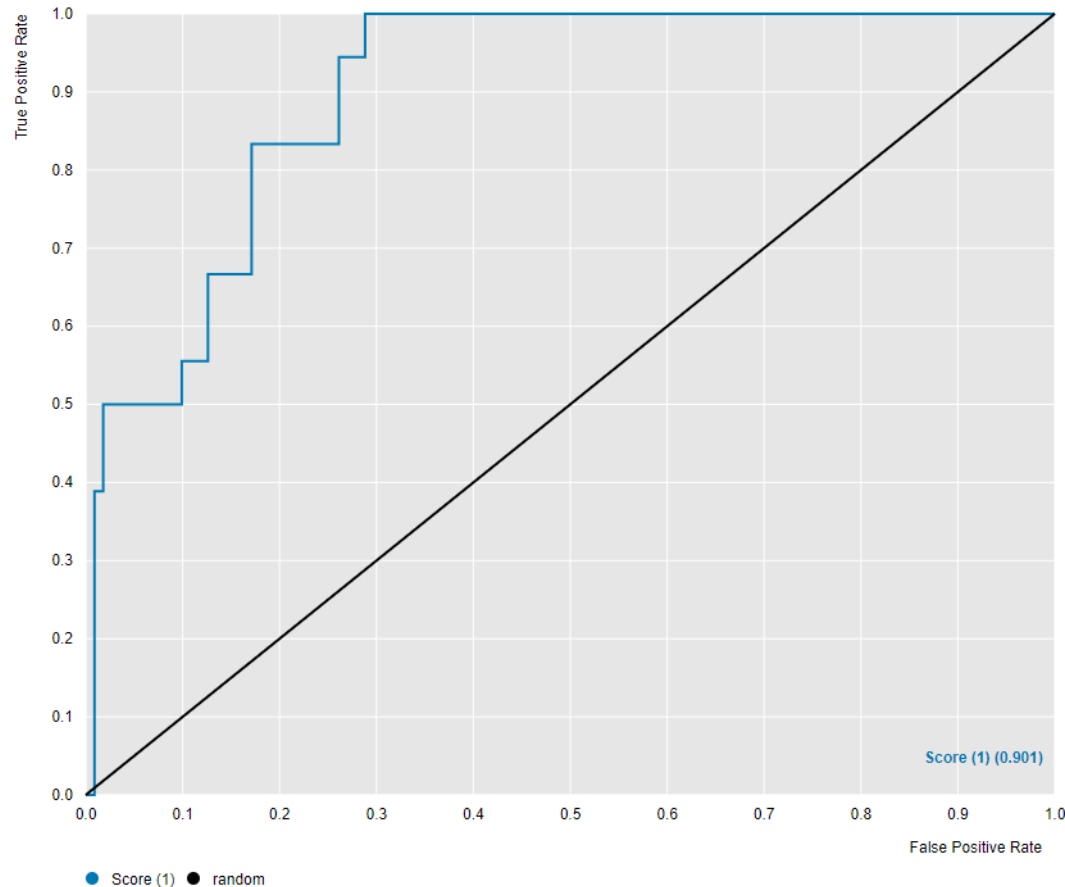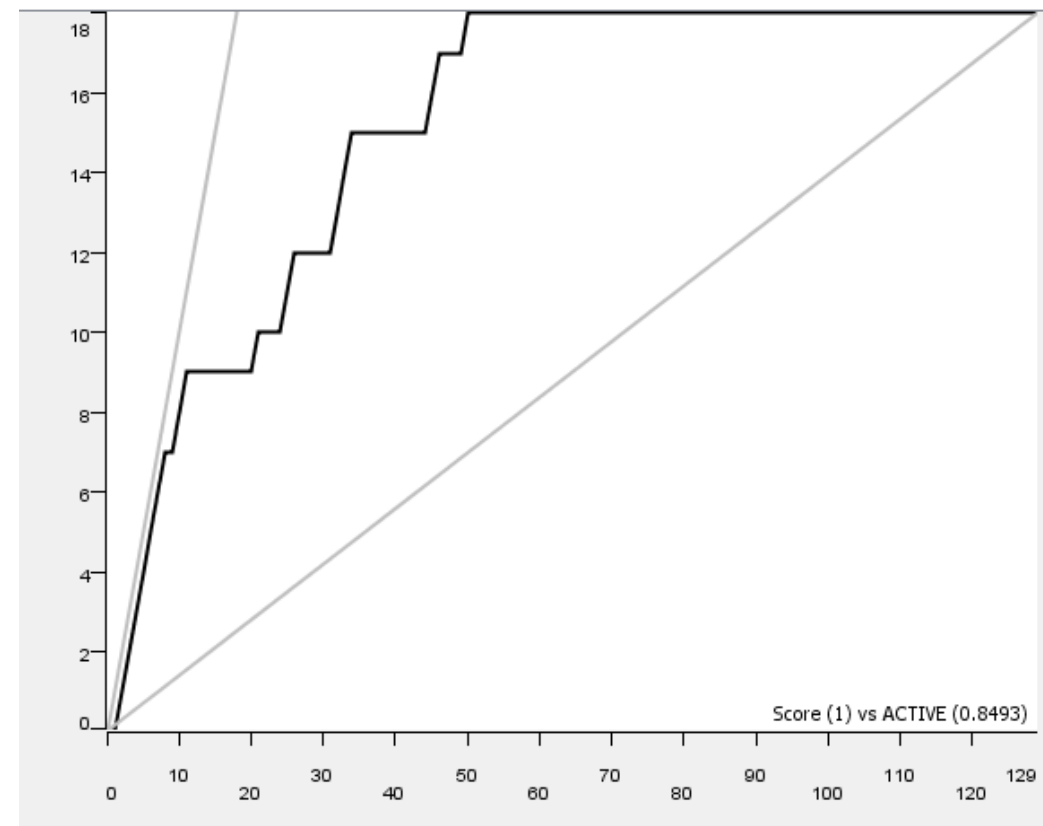

N=129

Top 10% Mean  
IC50

24.5 Nm

|          | Predicted Active | Predicted Inactive |
|----------|------------------|--------------------|
| Active   | 18               | 0                  |
| Inactive | 77               | 34                 |

# <15nM DefGood in beta-adren, 50% error

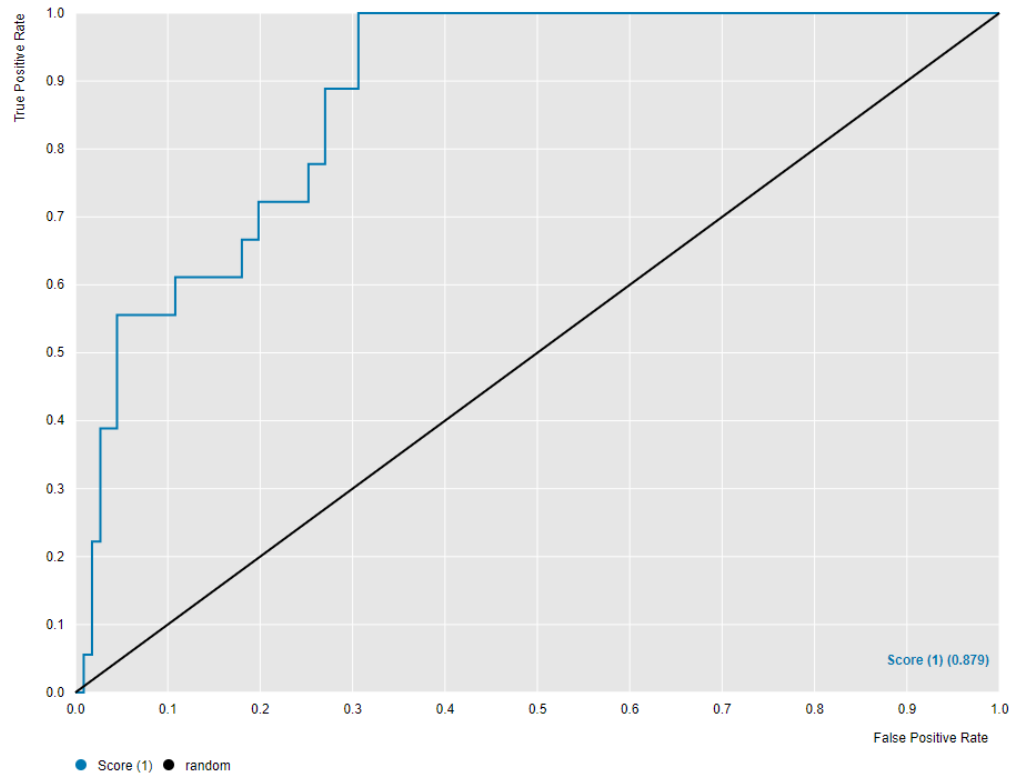

N=129

Top 10% Mean  
IC50

2,500 Nm

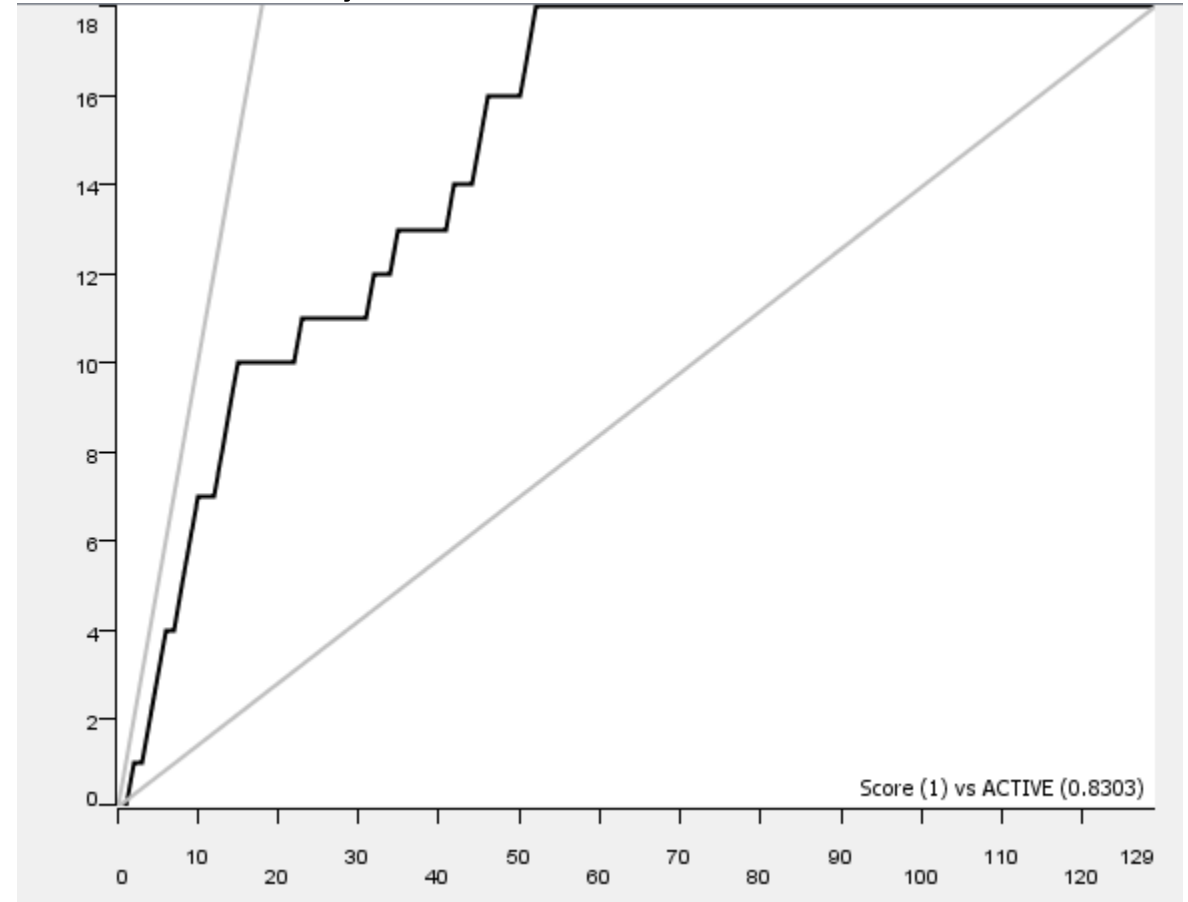

|          | Predicted Active | Predicted Inactive |
|----------|------------------|--------------------|
| Active   | 18               | 0                  |
| Inactive | 77               | 34                 |

<15nM DefGood in beta-adren, 10% error;  
Random seed = 429

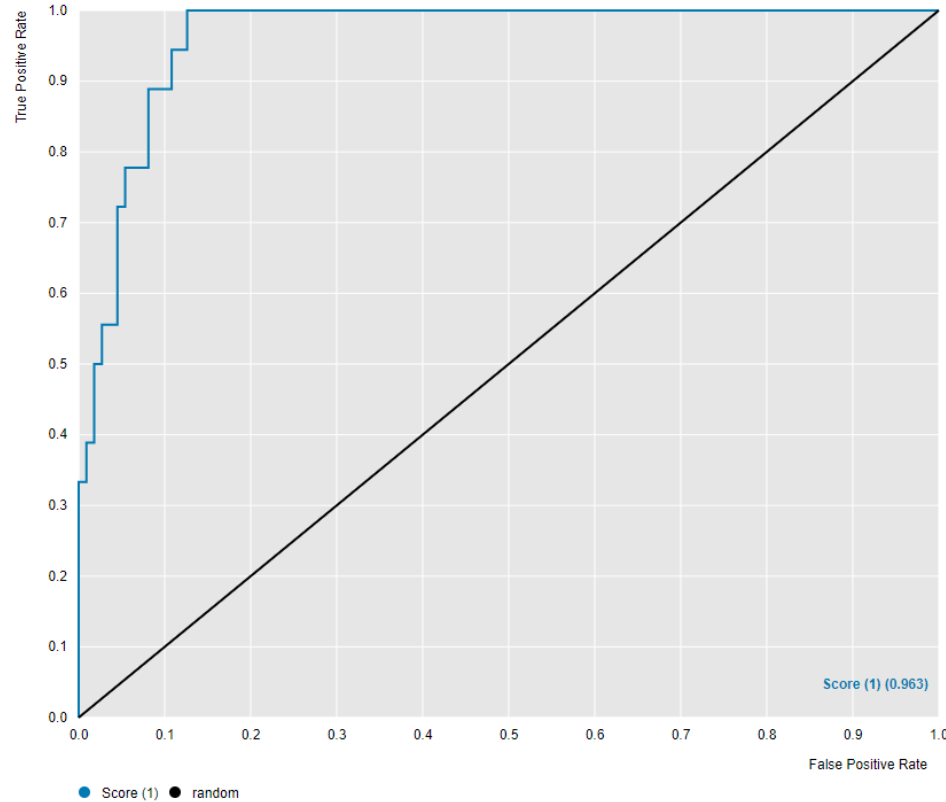

N=129

| Top 10% Mean<br>IC50 | 17.9 nM |
|----------------------|---------|
|----------------------|---------|

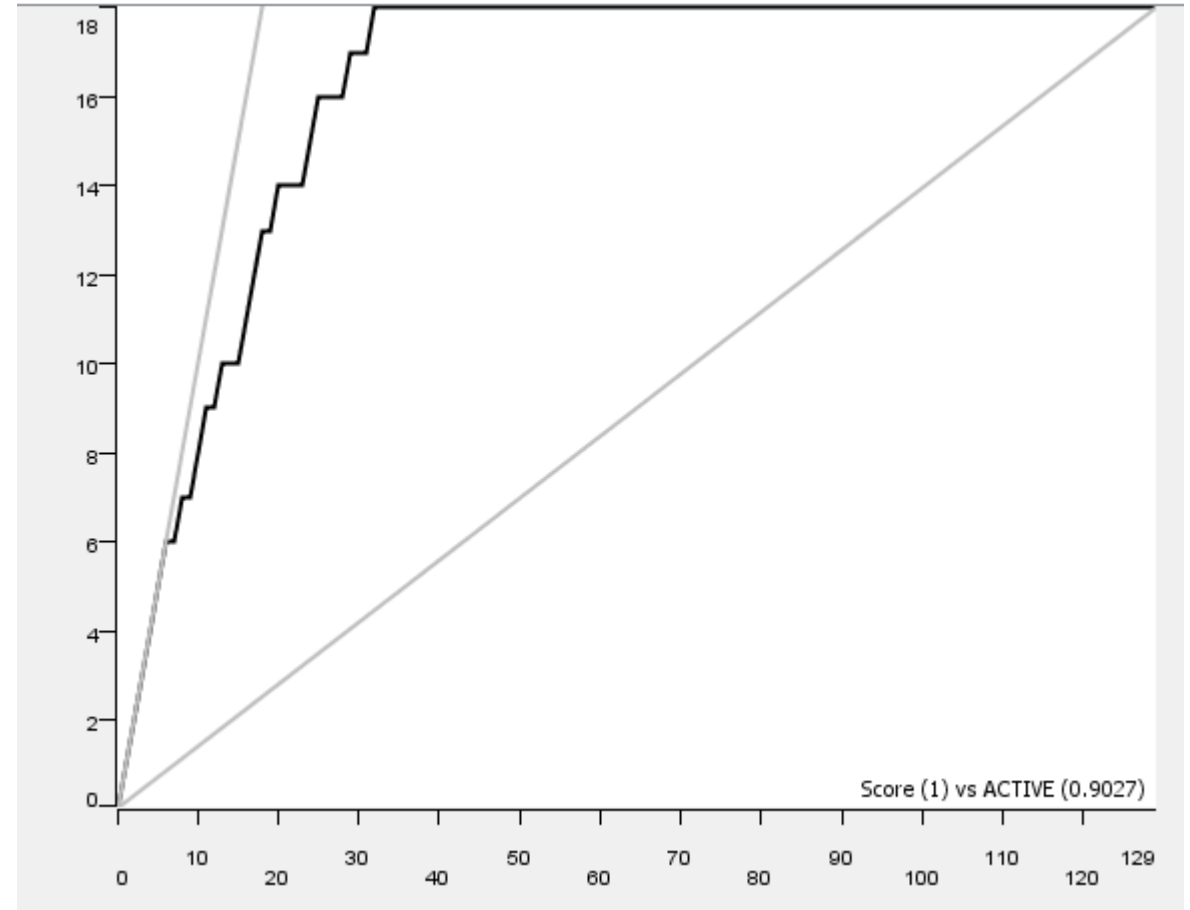

|          | Predicted Active | Predicted Inactive |
|----------|------------------|--------------------|
| Active   | 16               | 2                  |
| Inactive | 9                | 102                |



<15nM DefGood in beta-adren, 20% error;  
Random seed = 429

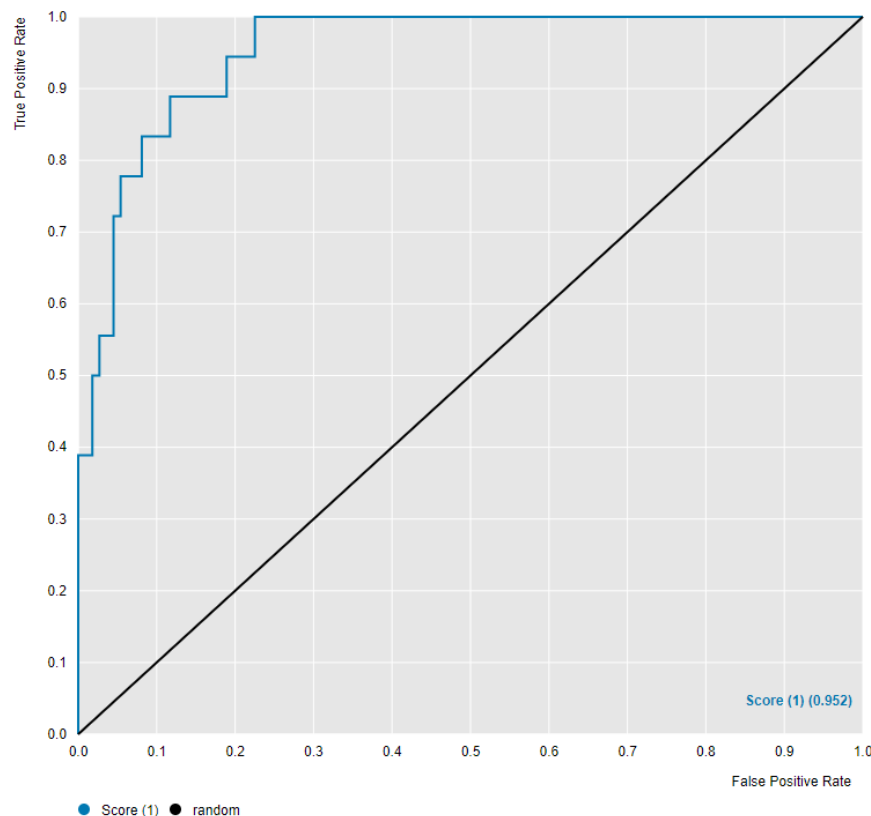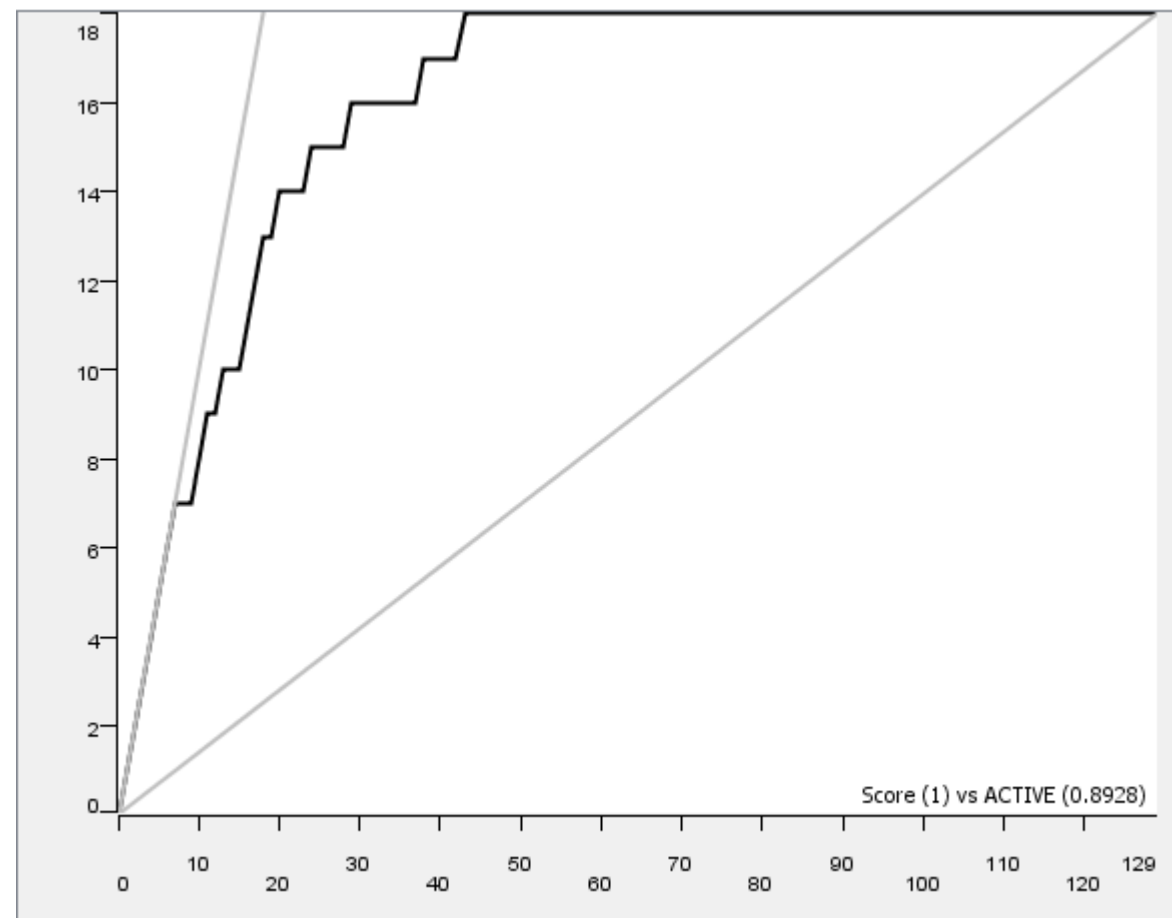

N=129

| Top 10% Mean<br>IC50 | 19.7 nM |
|----------------------|---------|
|----------------------|---------|

|          | Predicted Active | Predicted Inactive |
|----------|------------------|--------------------|
| Active   | 15               | 3                  |
| Inactive | 11               | 100                |

<15nM DefGood in beta-adren, 30% error;  
Random seed = 429

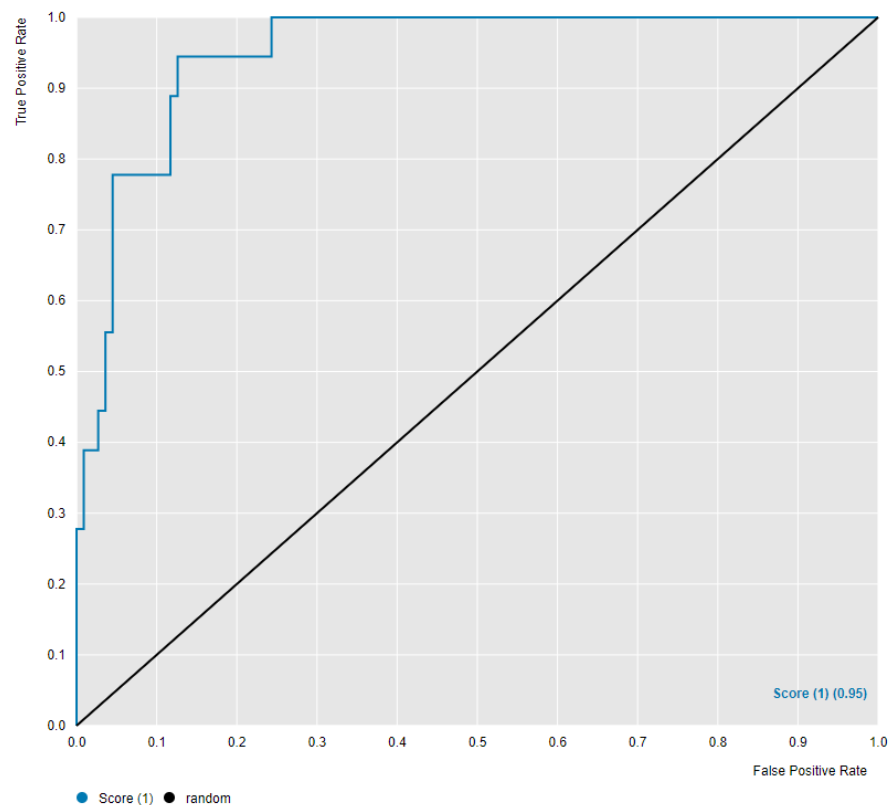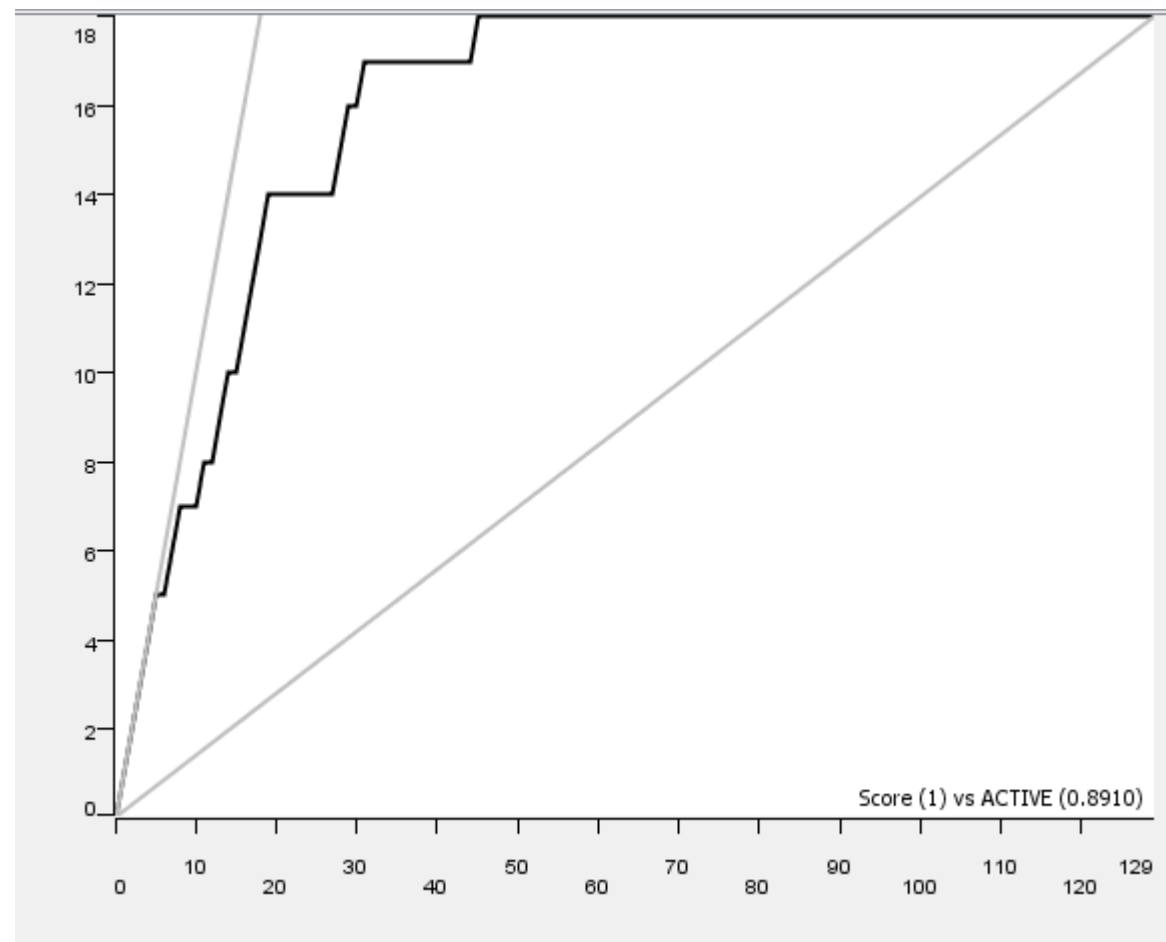

N=129

Top 10% Mean  
IC50

30.0 nM

|          | Predicted Active | Predicted Inactive |
|----------|------------------|--------------------|
| Active   | 17               | 1                  |
| Inactive | 20               | 91                 |

<15nM DefGood in beta-adren, 40% error;  
Random seed = 429

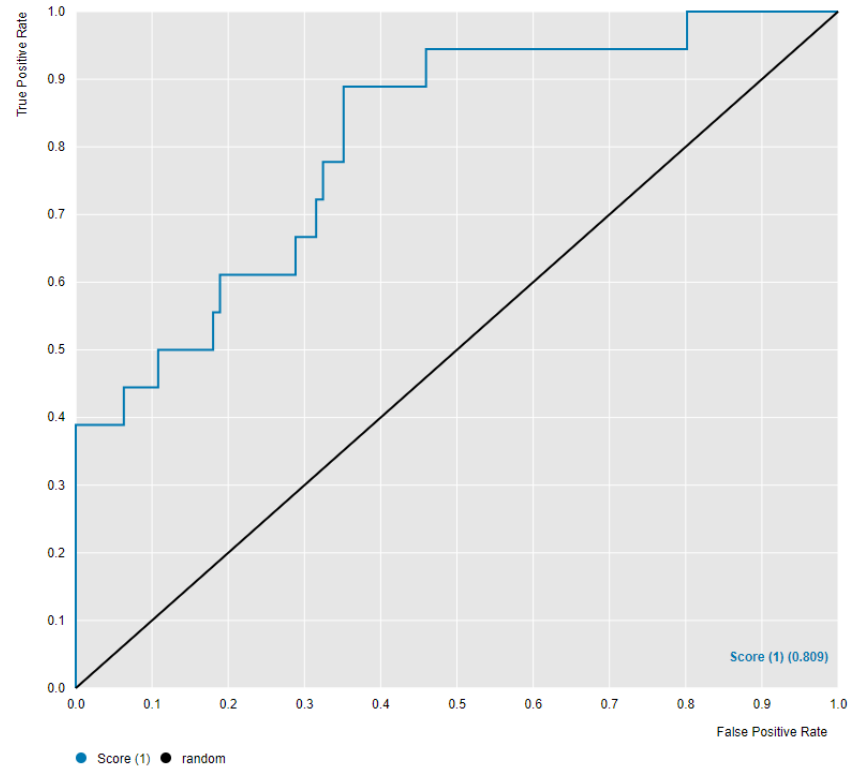

N=129

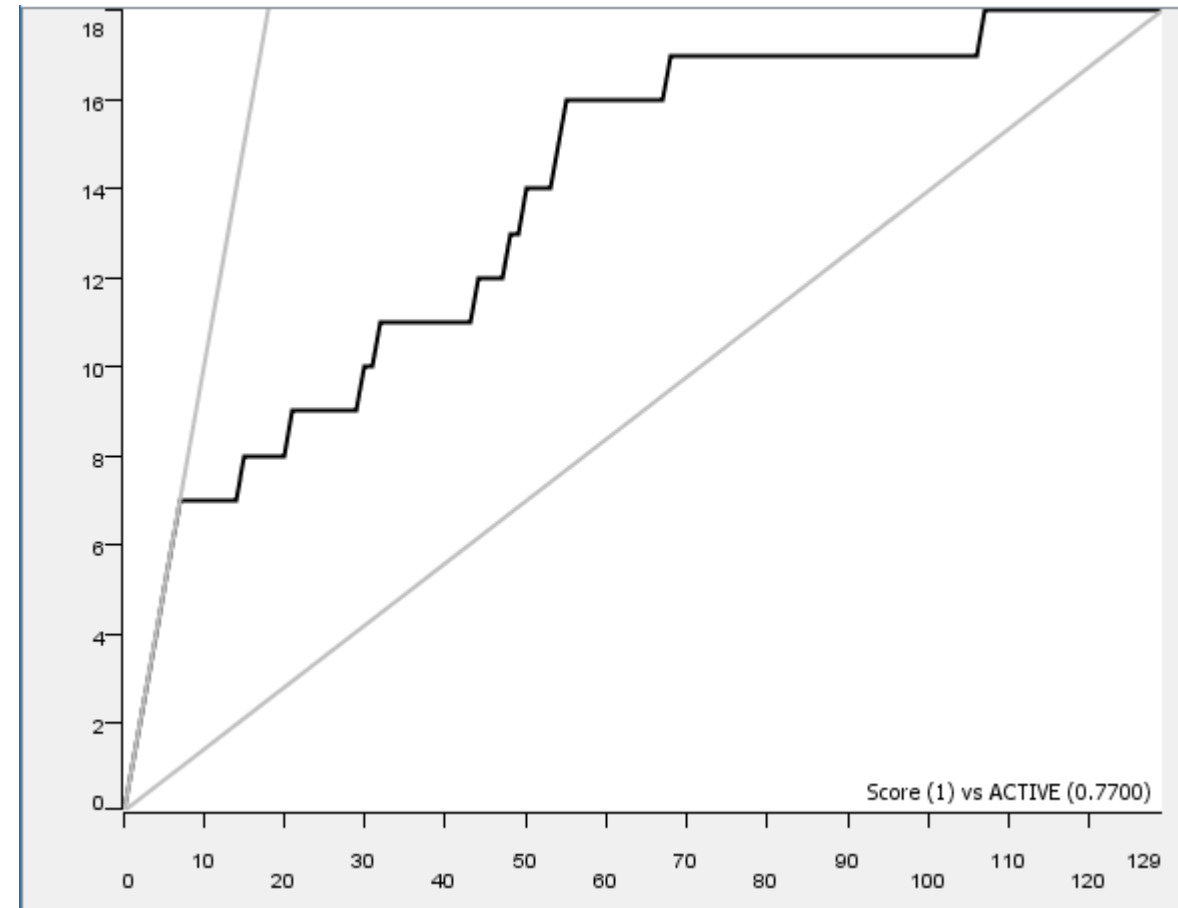

Top 10% Mean  
IC50

109 nM  
(one 900 nM  
mistake)

|          | Predicted Active | Predicted Inactive |
|----------|------------------|--------------------|
| Active   | 17               | 1                  |
| Inactive | 67               | 44                 |

<15nM DefGood in beta-adren, 45% error;  
Random seed = 429

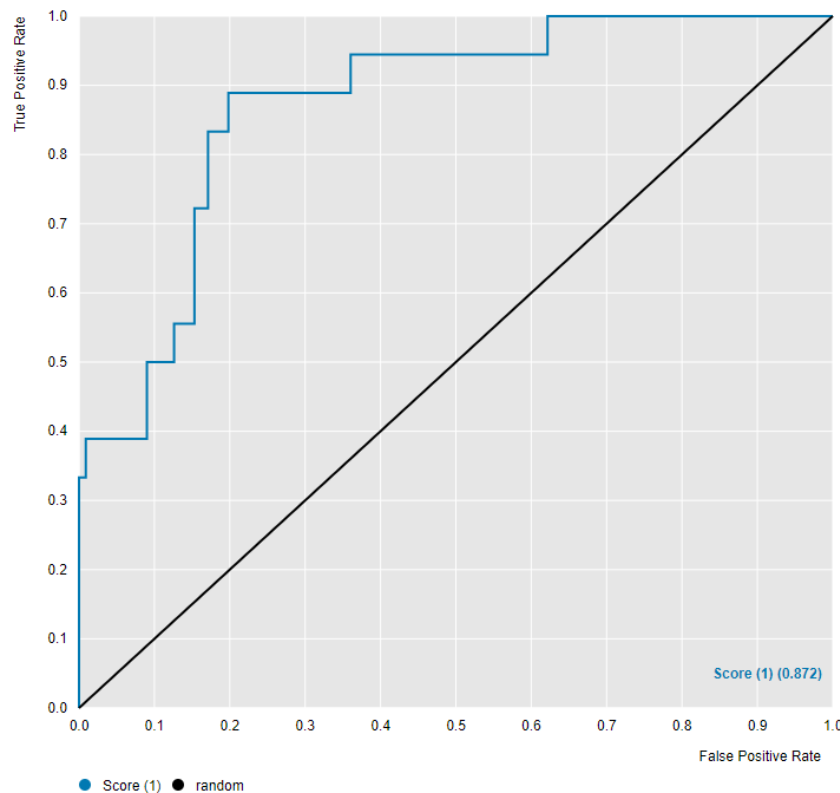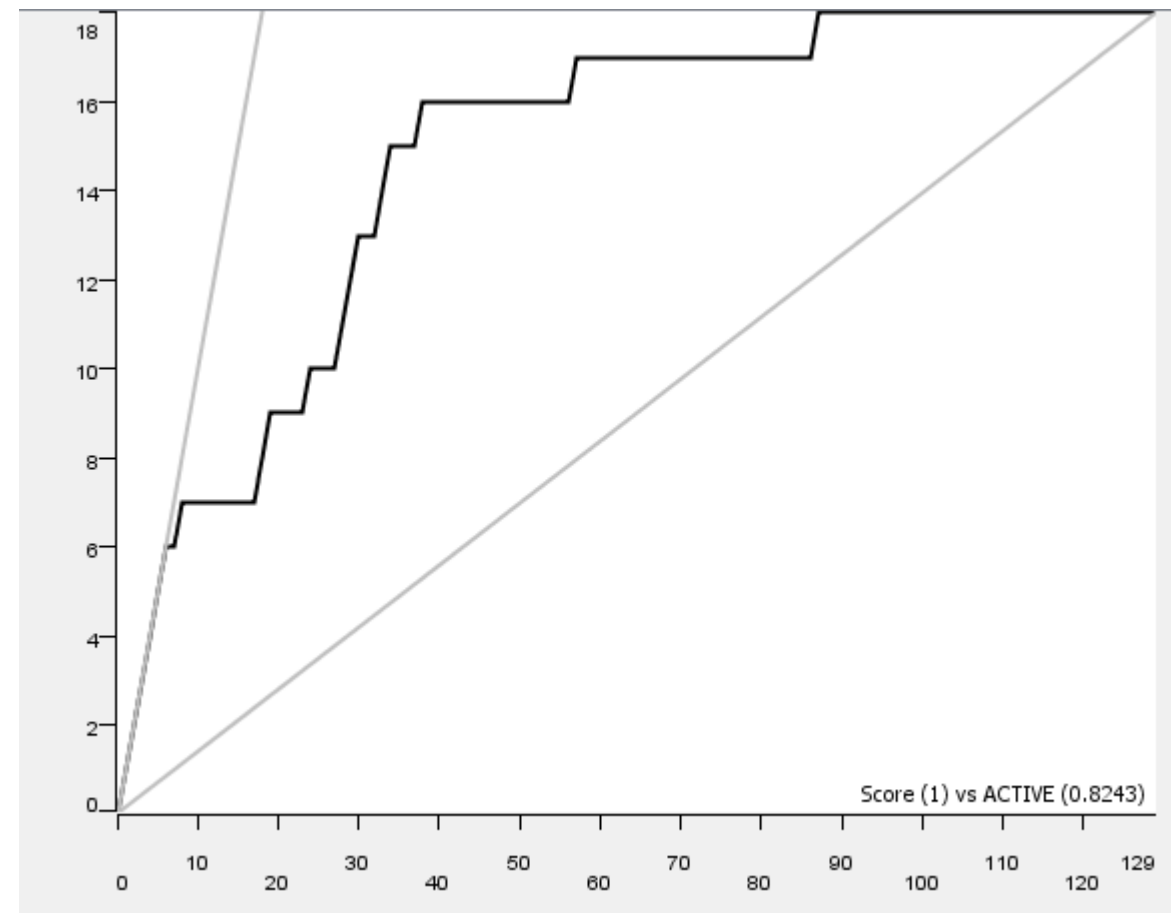

N=129

|                      |                                   |
|----------------------|-----------------------------------|
| Top 10% Mean<br>IC50 | 105 nM<br>(one 900 nM<br>mistake) |
|----------------------|-----------------------------------|

|          | Predicted Active | Predicted Inactive |
|----------|------------------|--------------------|
| Active   | 7                | 11                 |
| Inactive | 2                | 109                |

<15nM DefGood in beta-adren, 50% error;  
Random seed = 429

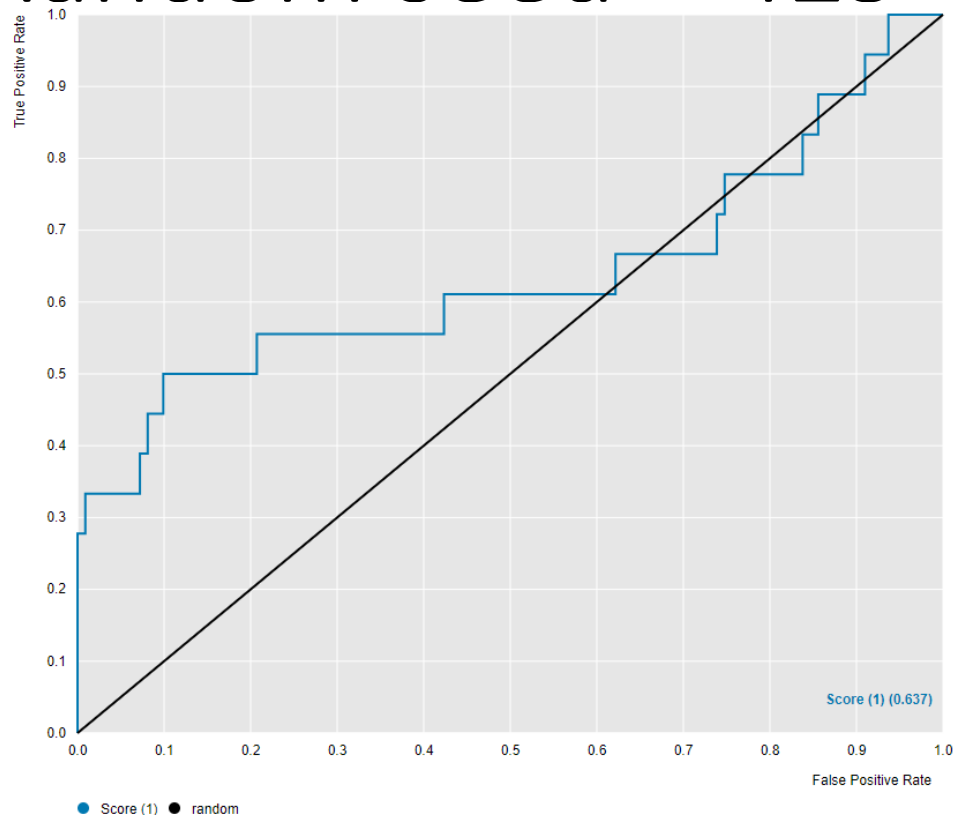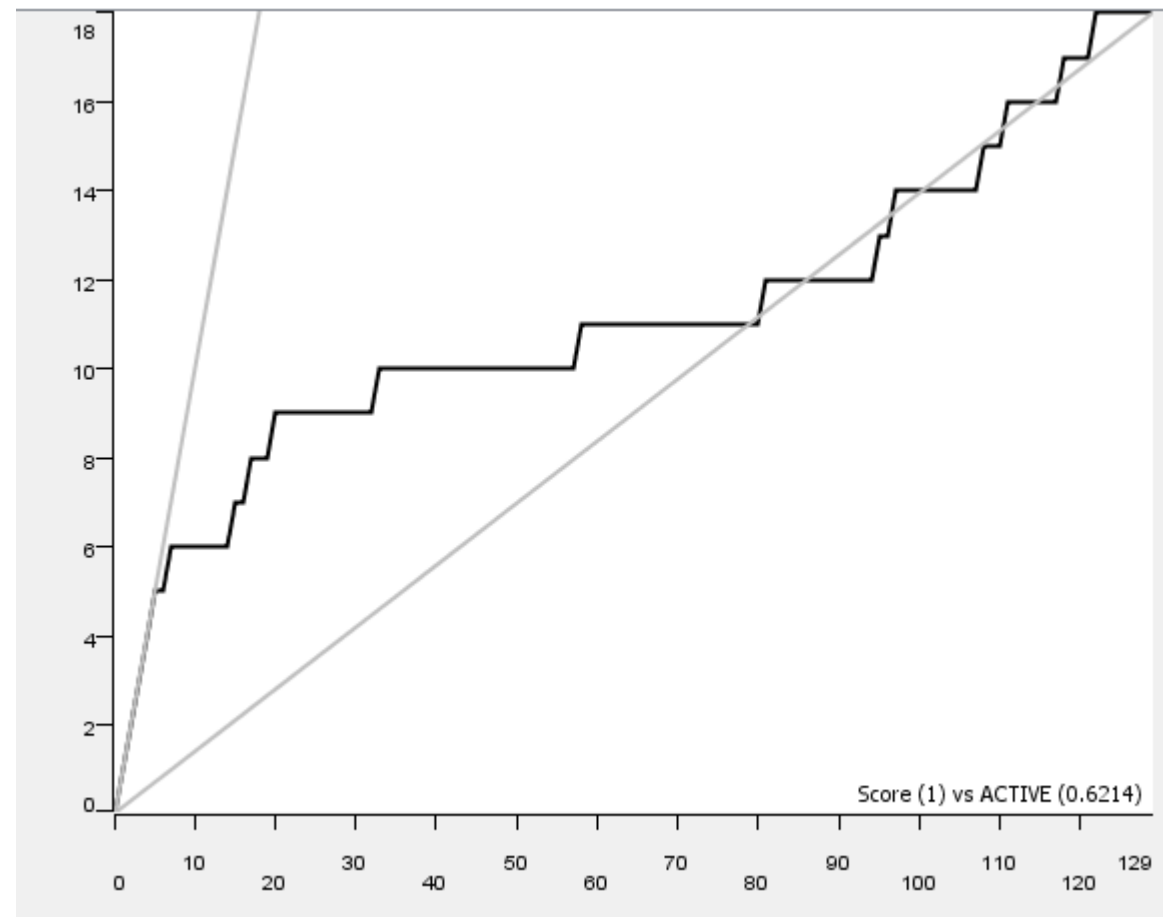

N=129

| Top 10% Mean<br>IC50 | 1,900 nM |
|----------------------|----------|
|----------------------|----------|

|          | Predicted Active | Predicted Inactive |
|----------|------------------|--------------------|
| Active   | 8                | 10                 |
| Inactive | 11               | 100                |

<15nM DefGood in beta-adren, 10% error;  
Random seed = 121783

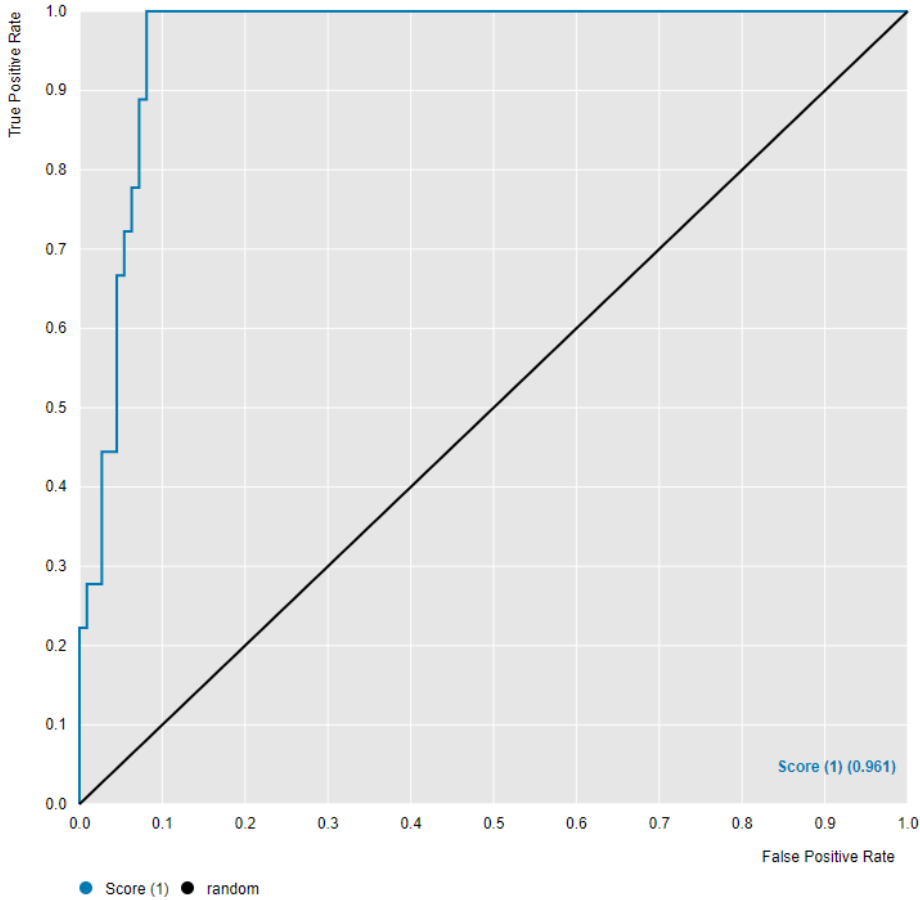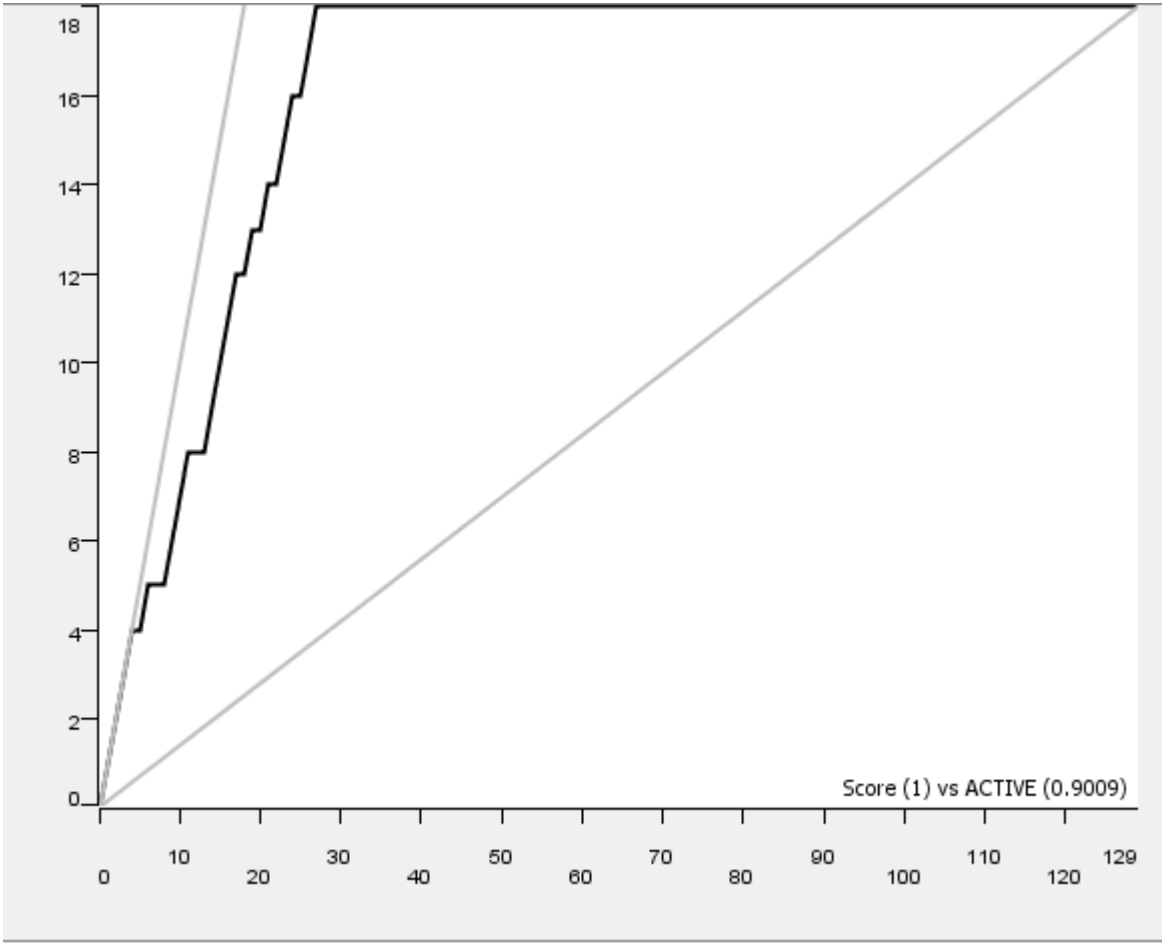

N=129

| Top 10% Mean IC50 | 18.5 nM |
|-------------------|---------|
|-------------------|---------|

|          | Predicted Active | Predicted Inactive |
|----------|------------------|--------------------|
| Active   | 18               | 0                  |
| Inactive | 12               | 99                 |

<15nM DefGood in beta-adren, 20% error;  
Random seed = 121783

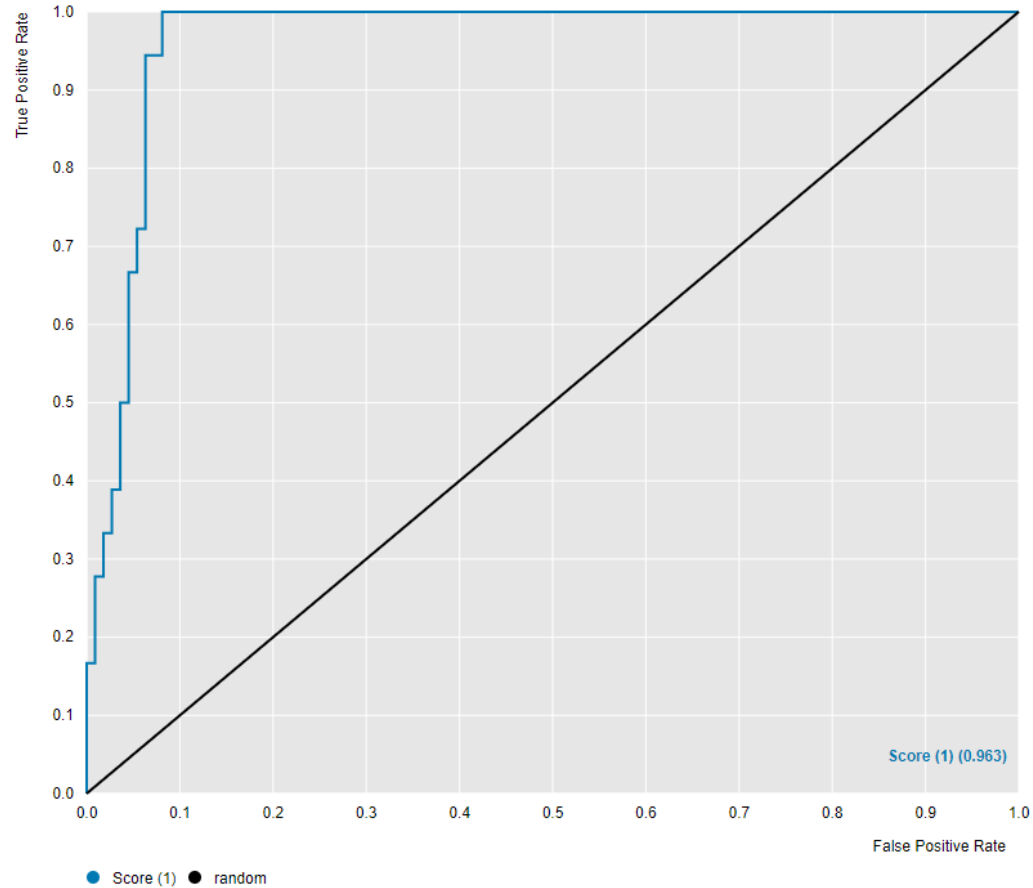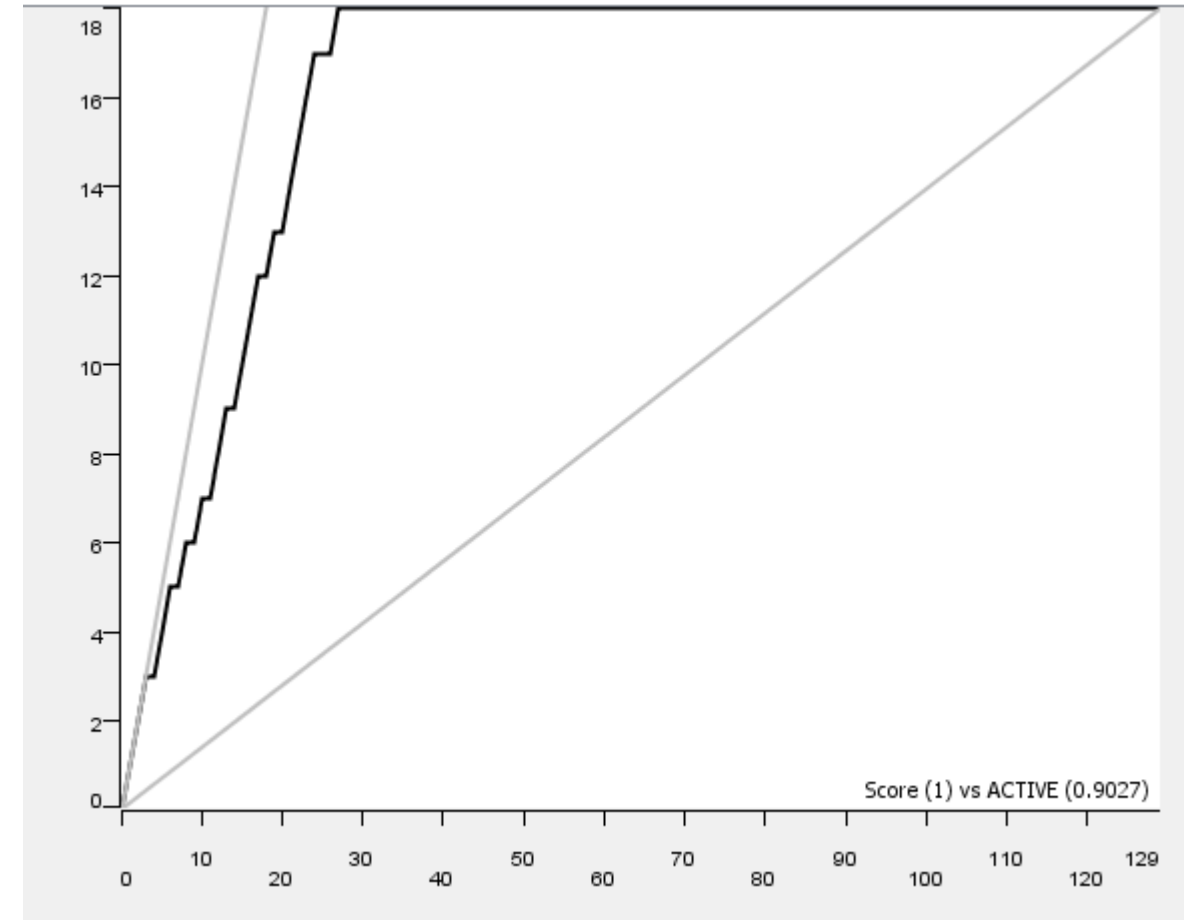

N=129

| Top 10% Mean<br>IC50 | 18.5 nM |
|----------------------|---------|
|----------------------|---------|

|          | Predicted Active | Predicted Inactive |
|----------|------------------|--------------------|
| Active   | 18               | 0                  |
| Inactive | 12               | 99                 |

<15nM DefGood in beta-adren, 30% error;  
Random seed = 121783

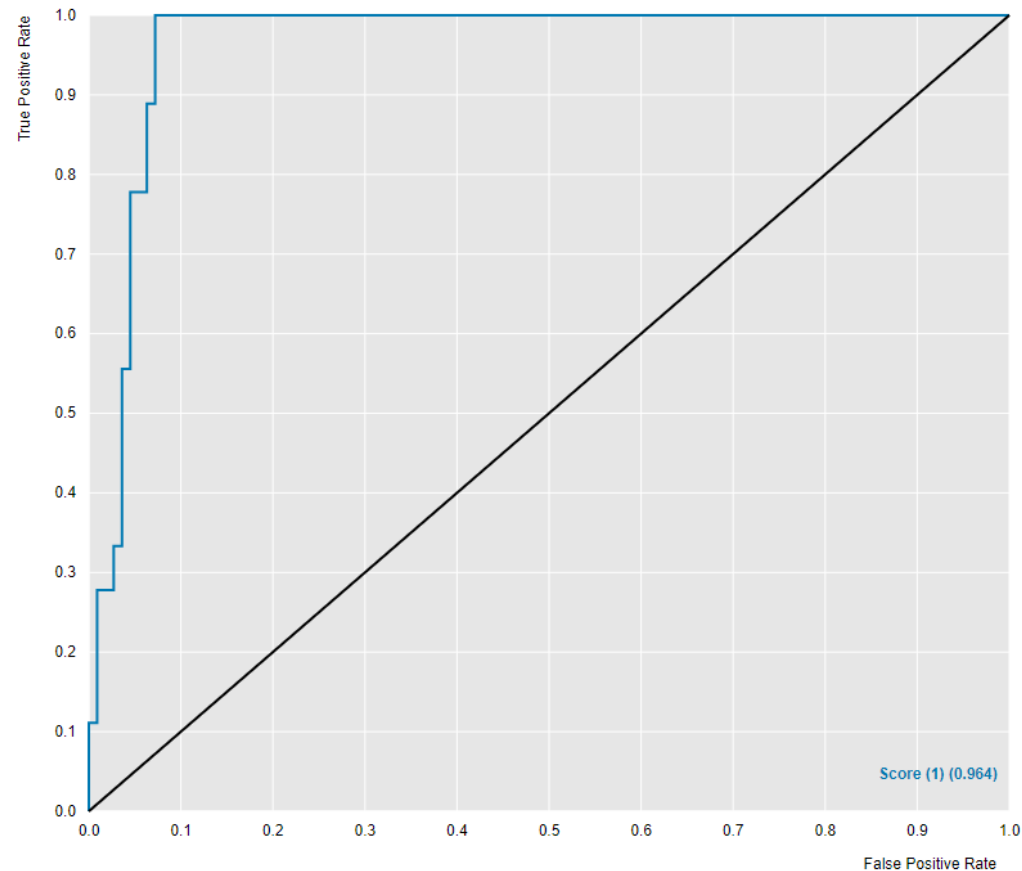

N=270

| Top 10% Mean IC50 | 18.4 nM |
|-------------------|---------|
|-------------------|---------|

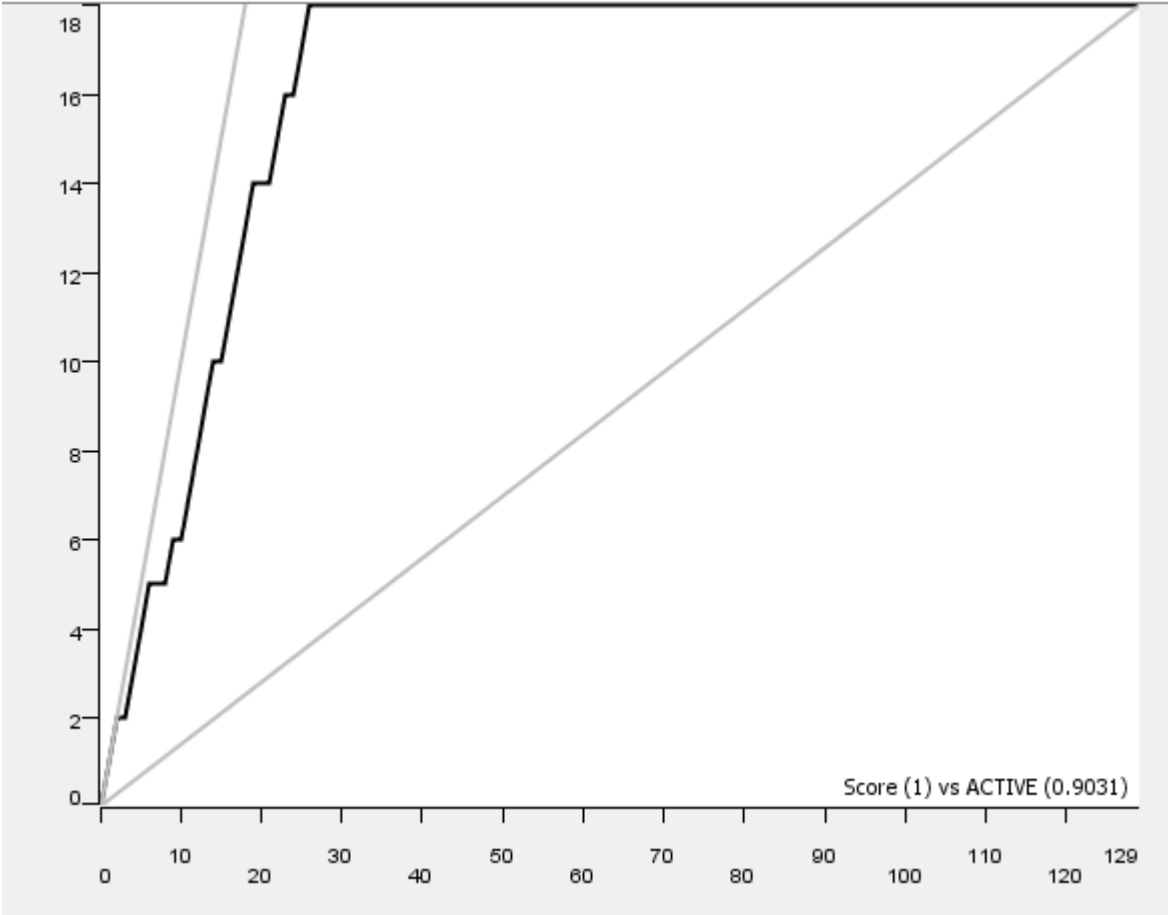

|          | Predicted Active | Predicted Inactive |
|----------|------------------|--------------------|
| Active   | 18               | 0                  |
| Inactive | 20               | 91                 |



<15nM DefGood in beta-adren, 40% error;  
Random seed = 121783

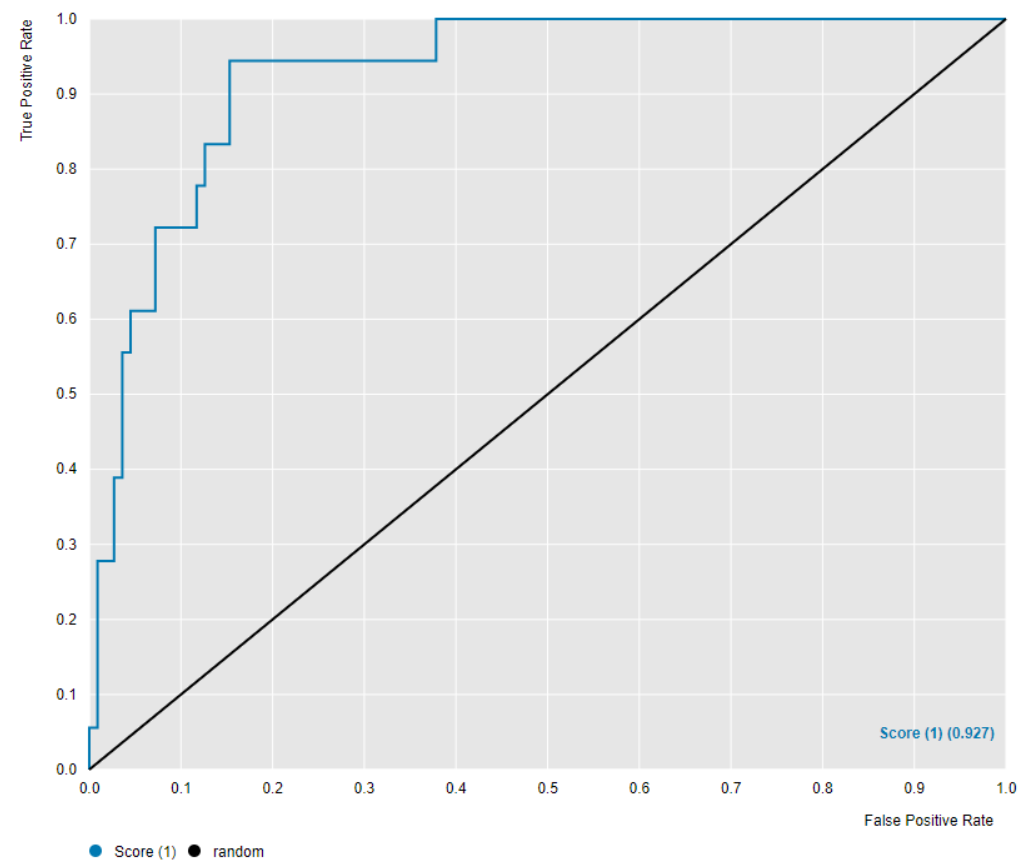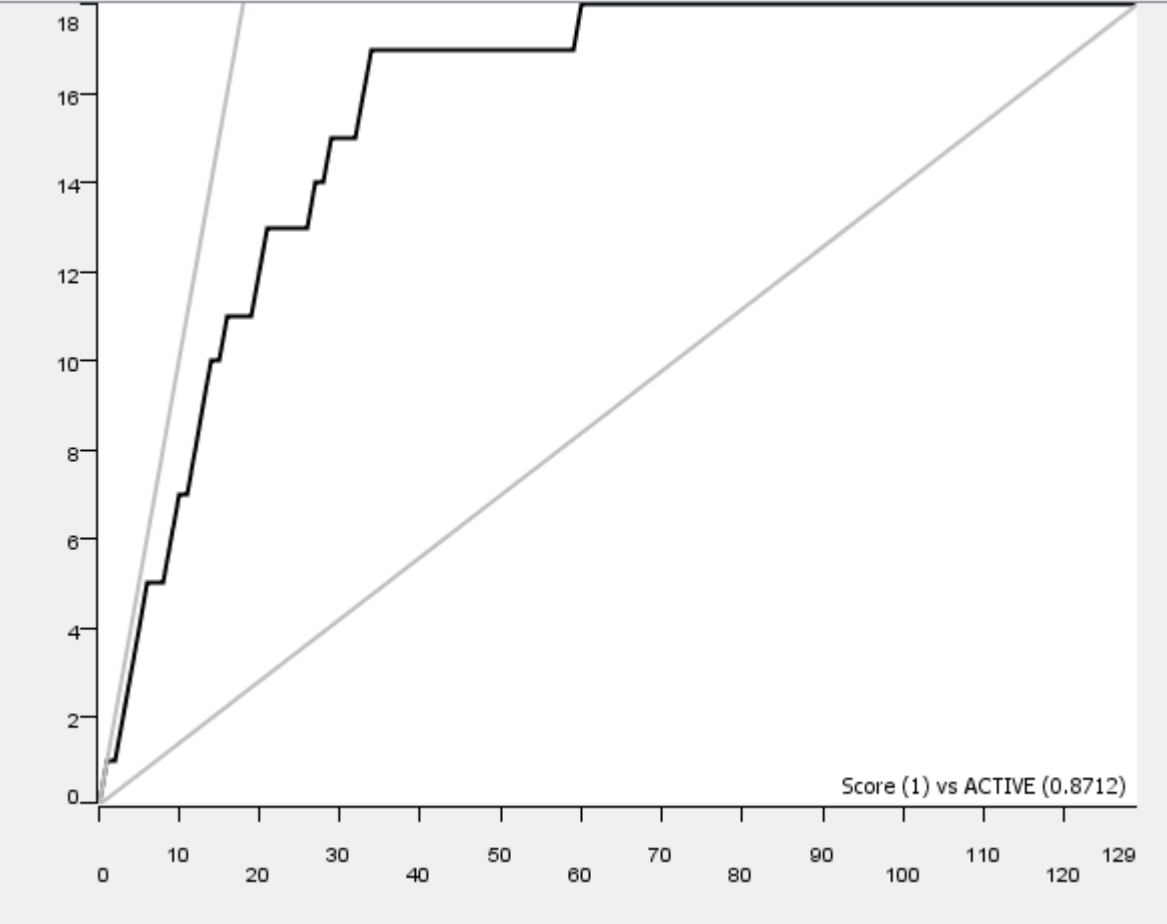

N=129

|                      |         |
|----------------------|---------|
| Top 10% Mean<br>IC50 | 18.4 nM |
|----------------------|---------|

|          | Predicted Active | Predicted Inactive |
|----------|------------------|--------------------|
| Active   | 17               | 1                  |
| Inactive | 31               | 80                 |

<15nM DefGood in beta-adren, 45% error;  
Random seed = 121783

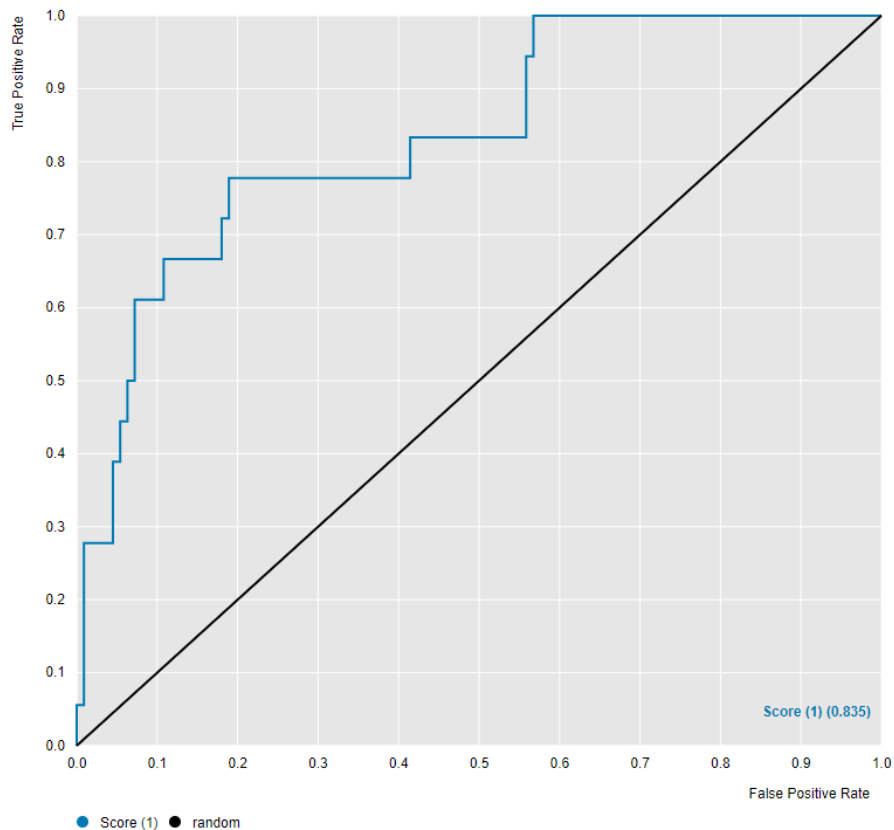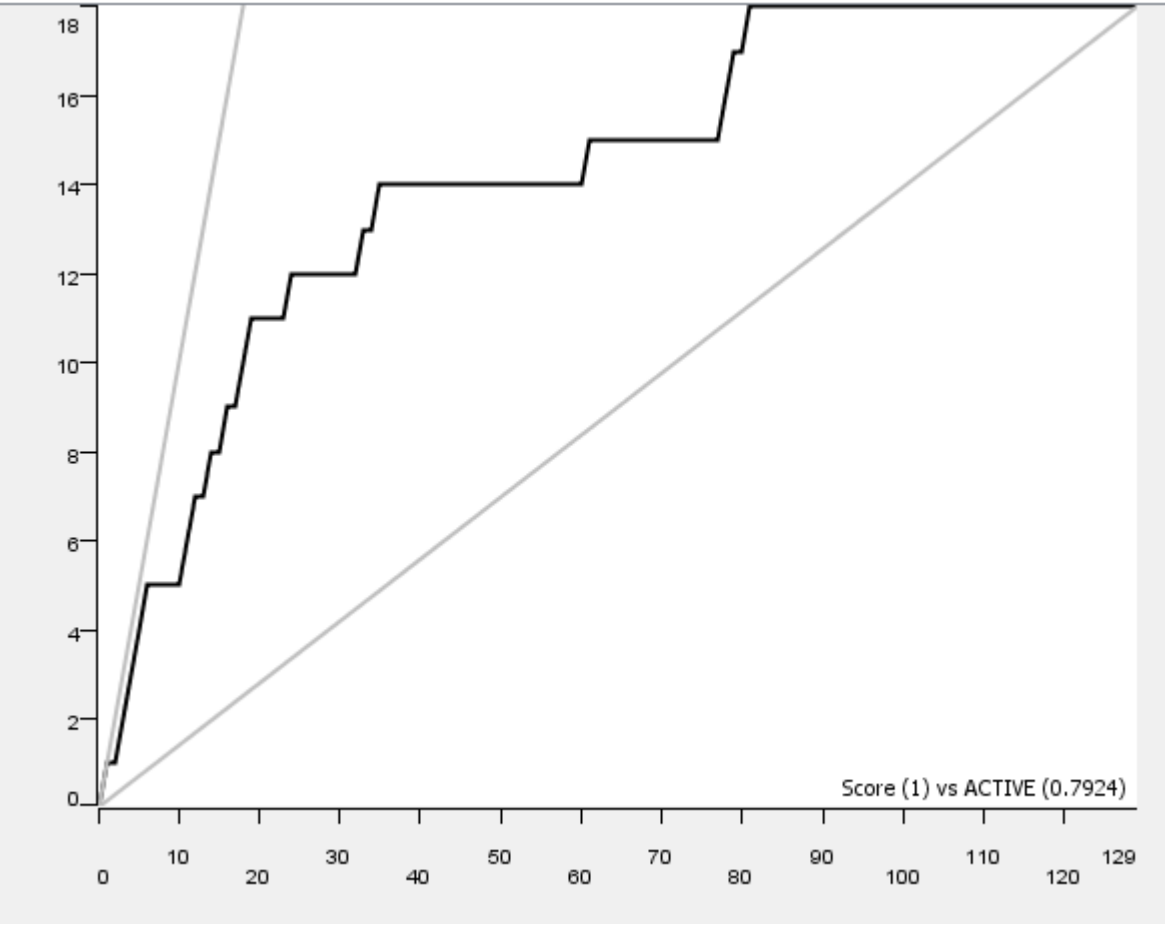

N=129

|                      |         |
|----------------------|---------|
| Top 10% Mean<br>IC50 | 33.1 nM |
|----------------------|---------|

|          | Predicted Active | Predicted Inactive |
|----------|------------------|--------------------|
| Active   | 14               | 4                  |
| Inactive | 30               | 81                 |

<15nM DefGood in beta-adren, 50% error;  
Random seed = 121783

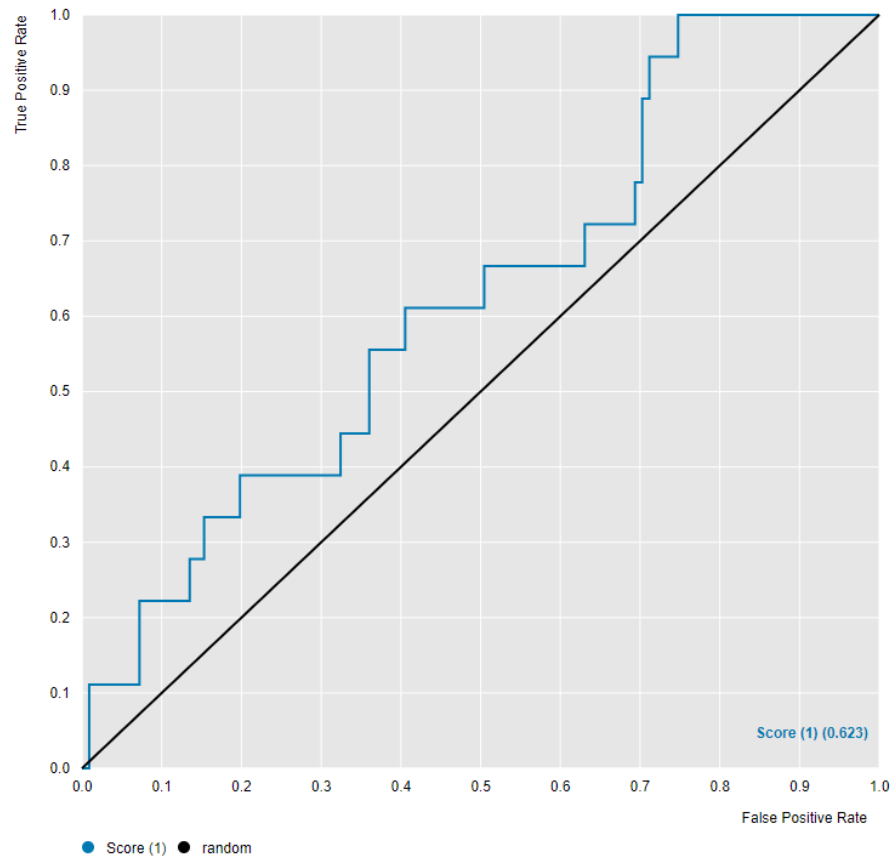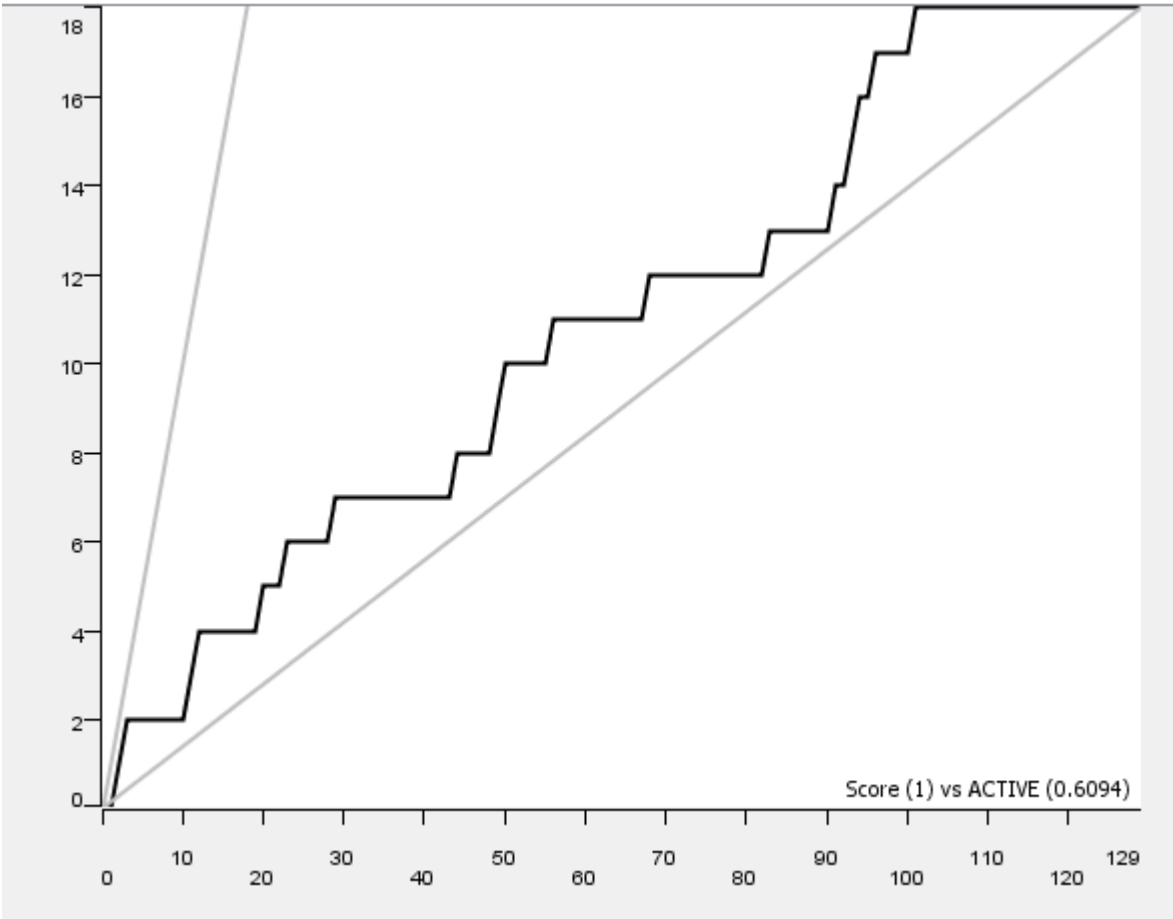

N=129

|                      |          |
|----------------------|----------|
| Top 10% Mean<br>IC50 | 250.5 nM |
|----------------------|----------|

|          | Predicted Active | Predicted Inactive |
|----------|------------------|--------------------|
| Active   | 10               | 8                  |
| Inactive | 42               | 69                 |

# Conclusion - NBN

- An NBN could be generated for the  $\beta_2$  adrenergic receptor with a decision value of  $<15$  nM as defined as active. The predictivity of the algorithm could be preserved in three random train/test cycles. The point of failure was 50%, 50% and 50% error.

# RF Error Tolerance- <15 nM DefGood in Beta Adrenergic Receptor

- 0-50% absolute error

RF- <15nM DefGood in beta-adren, 5% error;  
Random seed = 1515533876005

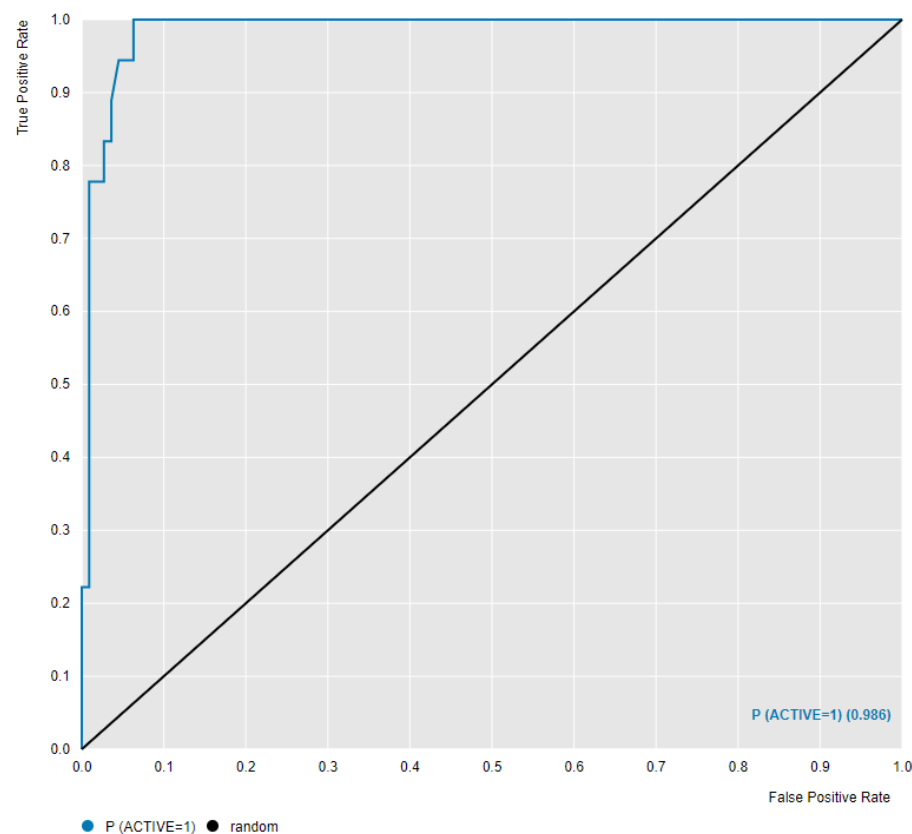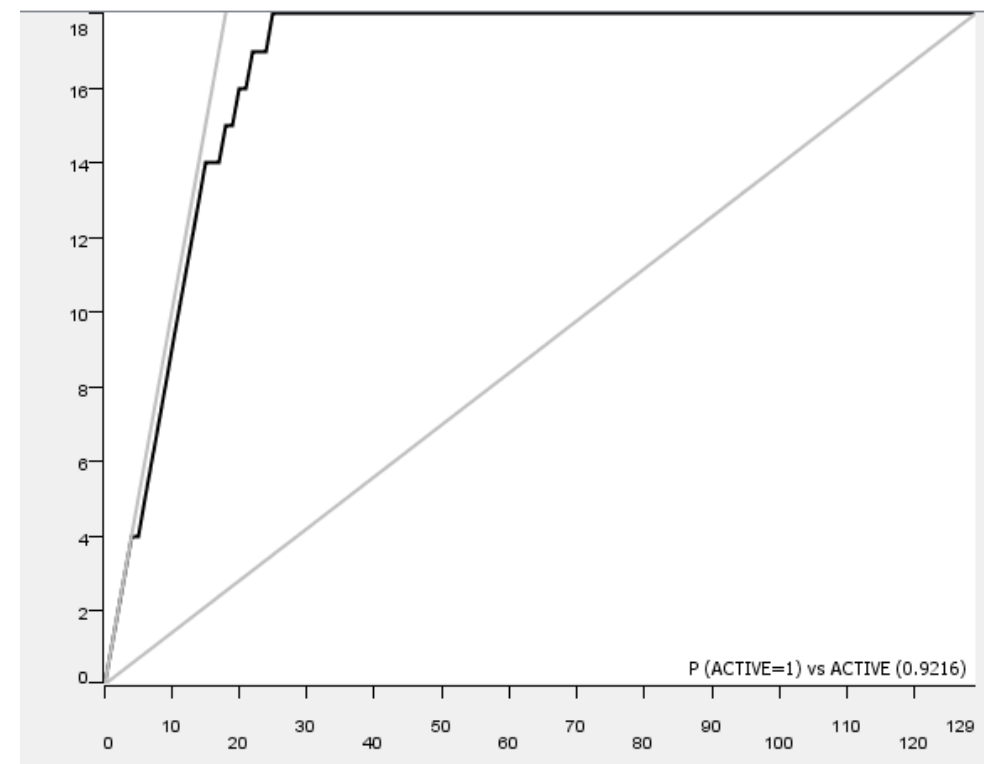

N=129

Top 10% Mean  
IC50

4.8 nM

|          | Predicted Active | Predicted Inactive |
|----------|------------------|--------------------|
| Active   | 15               | 3                  |
| Inactive | 3                | 108                |

# RF- <15nM DefGood in beta-adren, 10% error

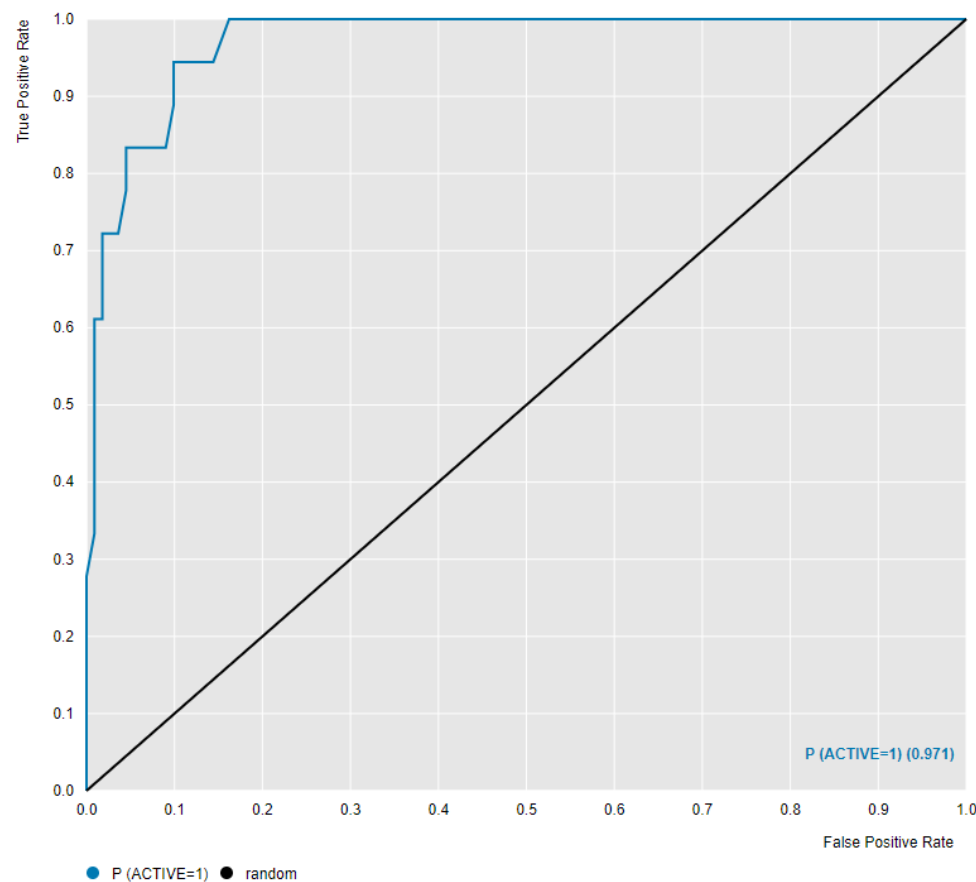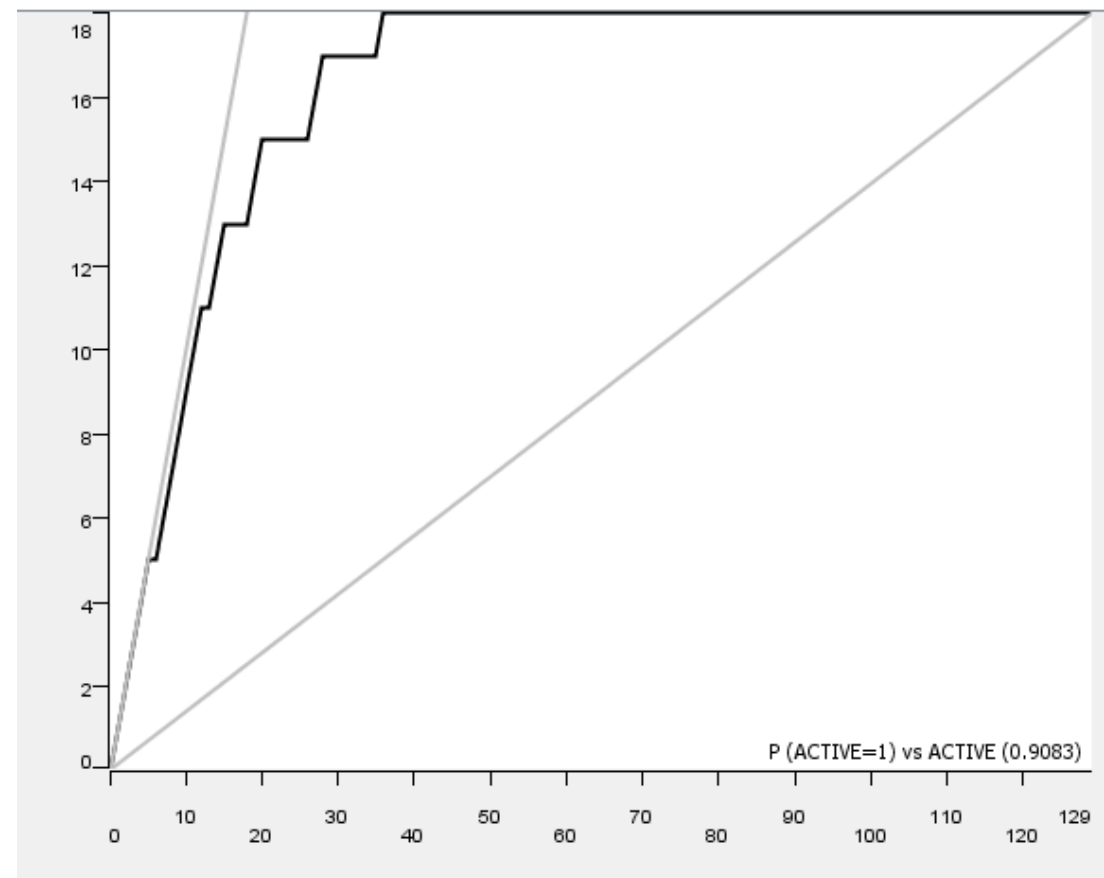

N=129

| Top 10% Mean IC50 | 4.7 nM |
|-------------------|--------|
|-------------------|--------|

|          | Predicted Active | Predicted Inactive |
|----------|------------------|--------------------|
| Active   | 15               | 3                  |
| Inactive | 6                | 105                |

# RF- <15nM DefGood in beta-adren, 20% error

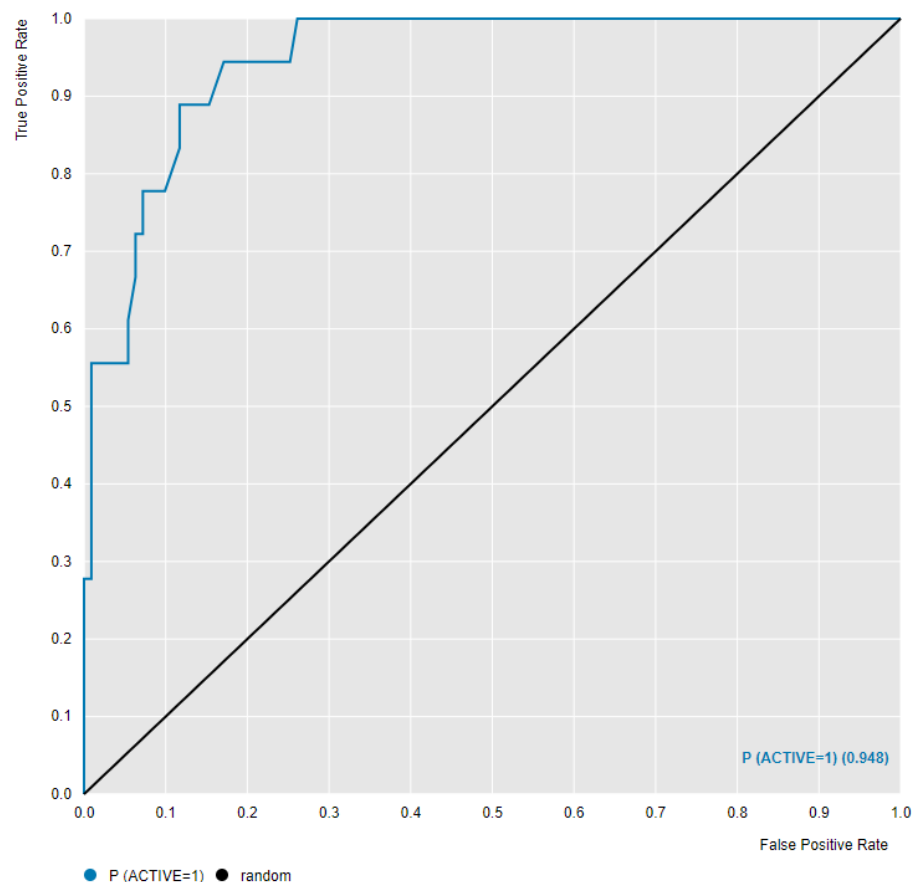

N=129

| Top 10% Mean IC50 | 95 nM |
|-------------------|-------|
|-------------------|-------|

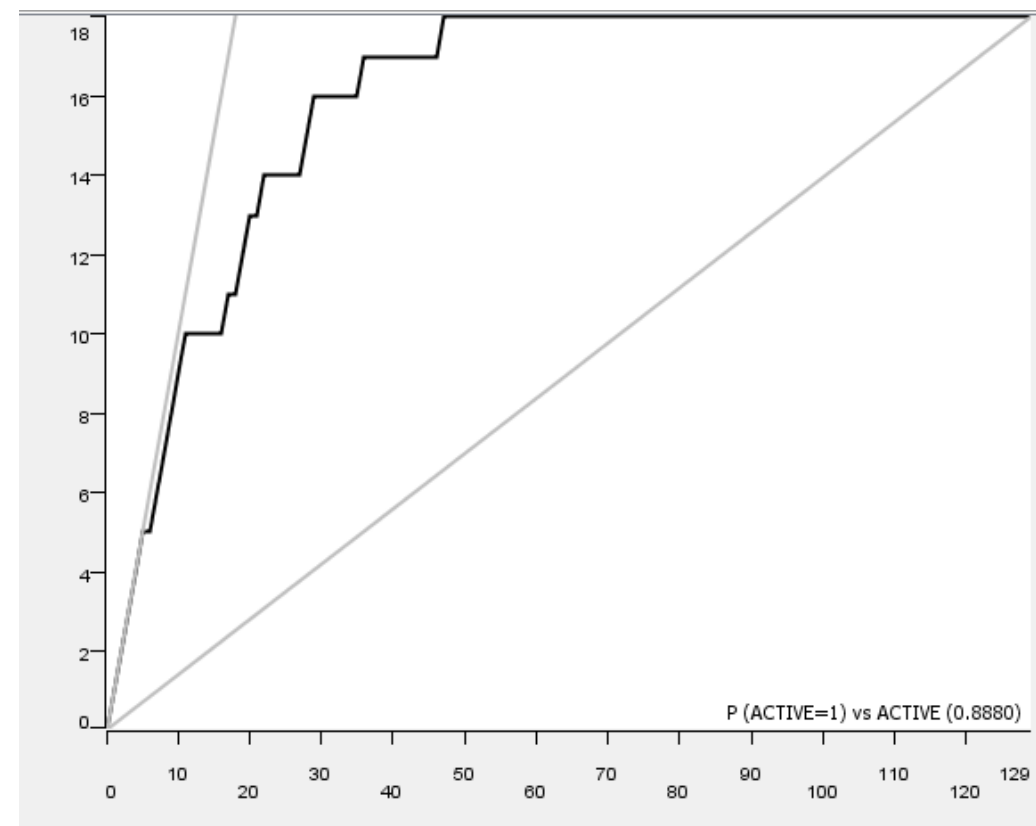

|          | Predicted Active | Predicted Inactive |
|----------|------------------|--------------------|
| Active   | 14               | 4                  |
| Inactive | 8                | 103                |



# RF- <15nM DefGood in beta-adren, 30% error

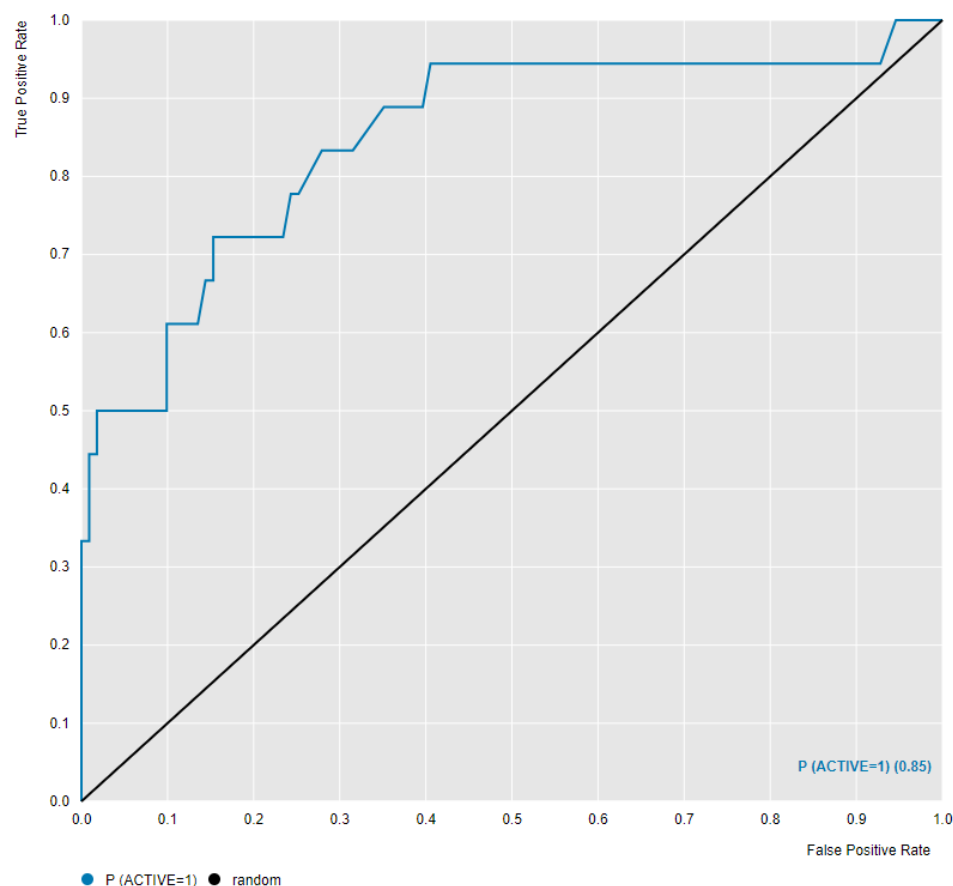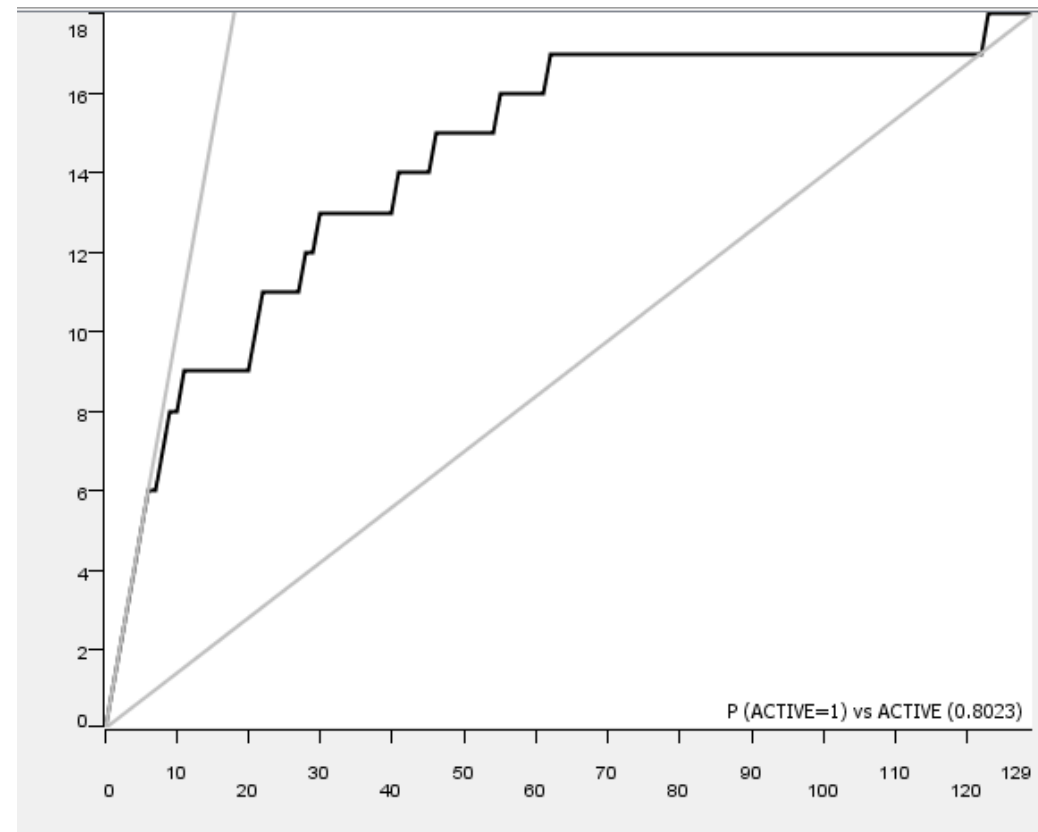

N=129

Top 10% Mean  
IC50

130 nM

|          | Predicted Active | Predicted Inactive |
|----------|------------------|--------------------|
| Active   | 13               | 5                  |
| Inactive | 19               | 92                 |

# RF- <15nM DefGood in beta-adren, 35% error

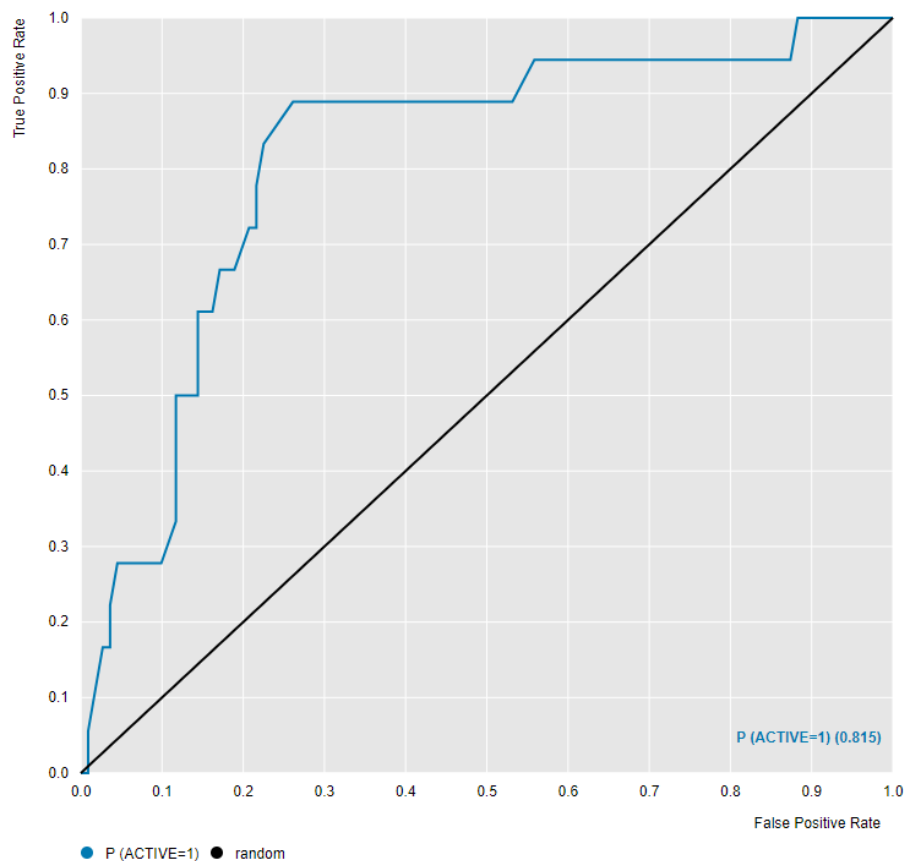

N=129

| Top 10% Mean IC50 | 3,700 nM |
|-------------------|----------|
|-------------------|----------|

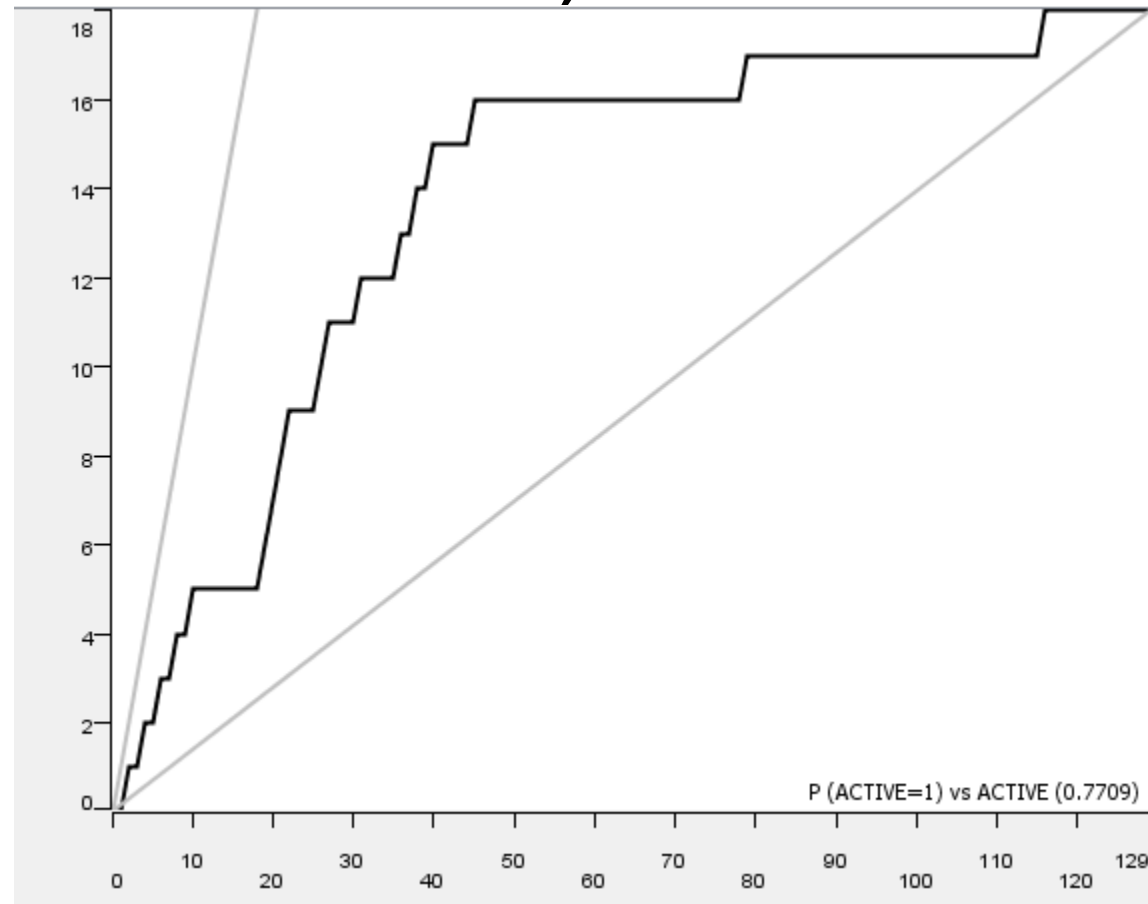

|          | Predicted Active | Predicted Inactive |
|----------|------------------|--------------------|
| Active   | 13               | 5                  |
| Inactive | 24               | 87                 |

<15nM DefGood in beta-adren, 10% error;  
Random seed = 429

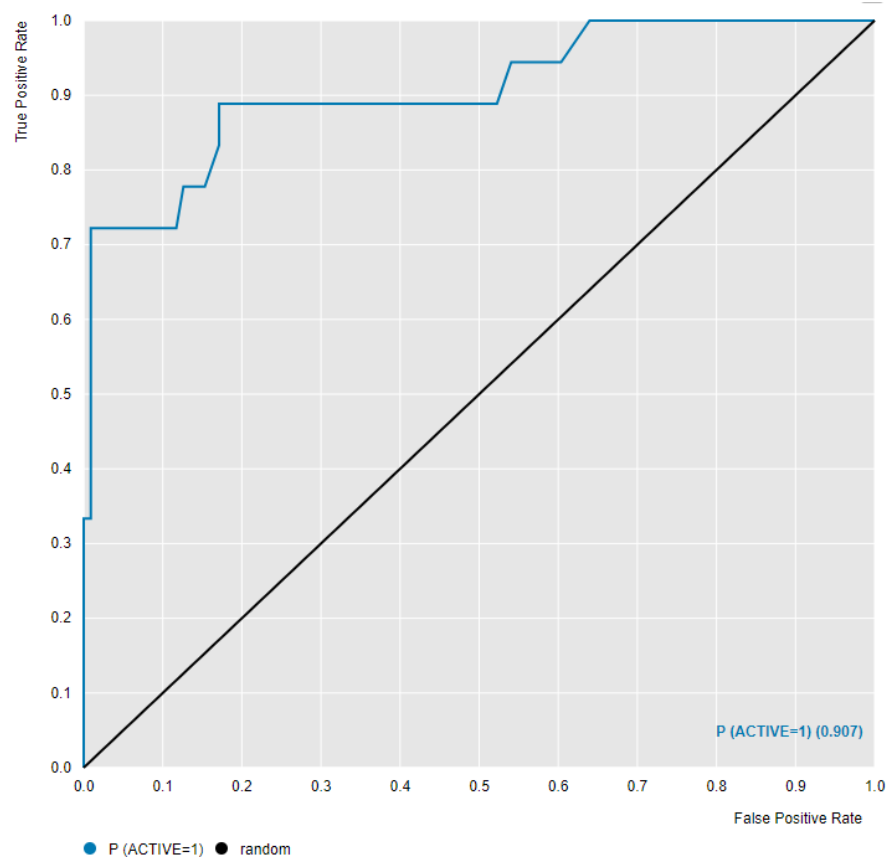

N=129

Top 10% Mean  
IC50

7.9 nM

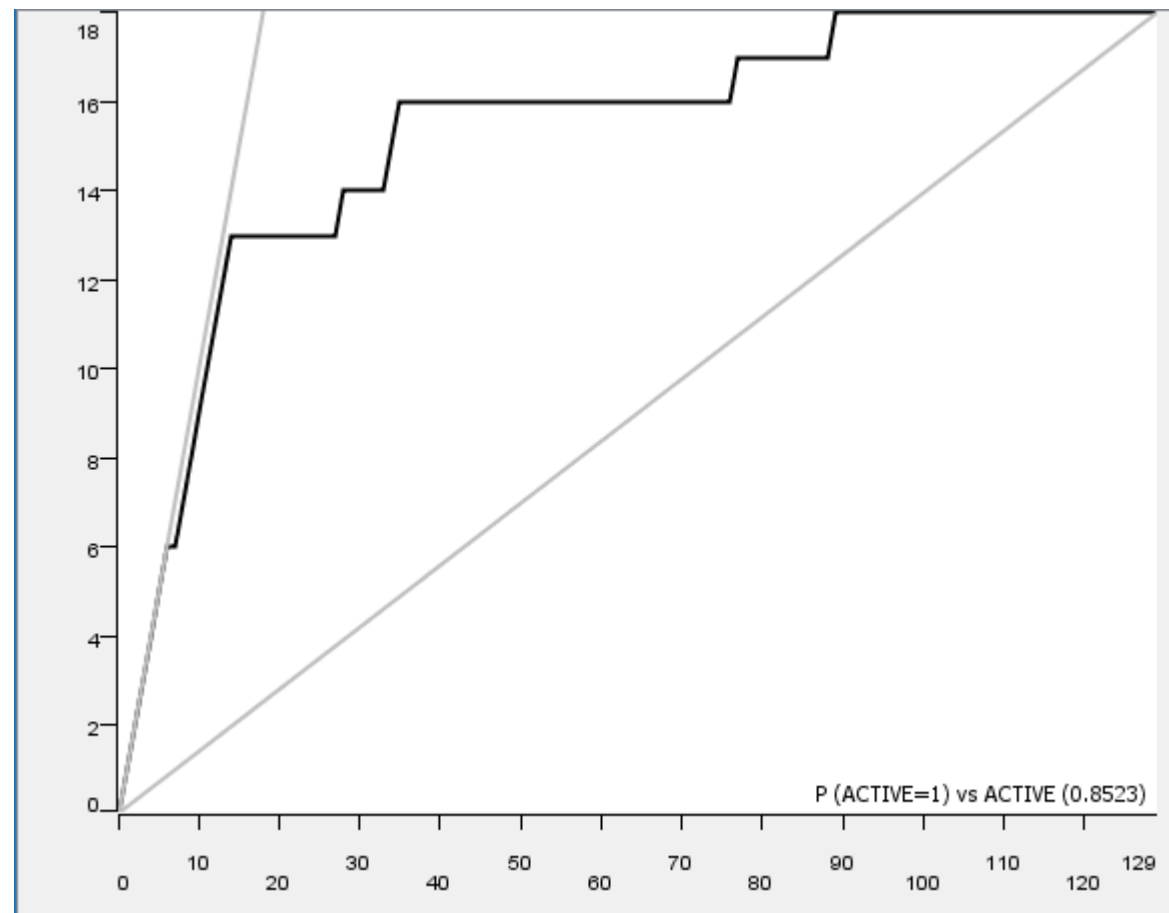

|          | Predicted Active | Predicted Inactive |
|----------|------------------|--------------------|
| Active   | 13               | 5                  |
| Inactive | 6                | 105                |

<15nM DefGood in beta-adren, 20% error;  
Random seed = 429

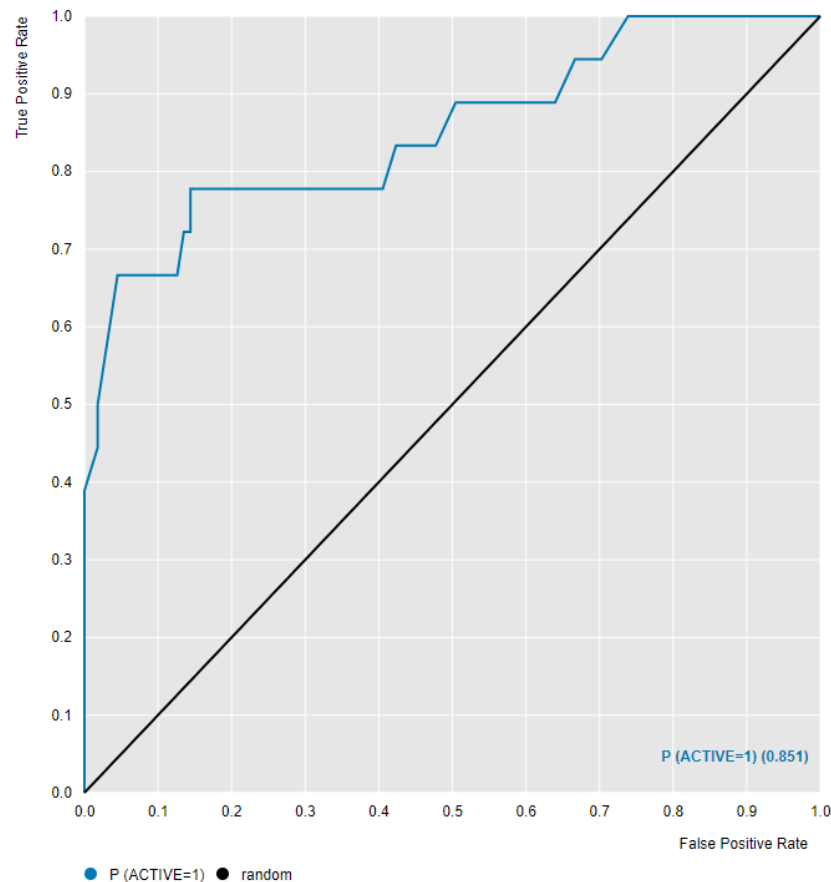

N=129

Top 10% Mean  
IC50

8.4 nM

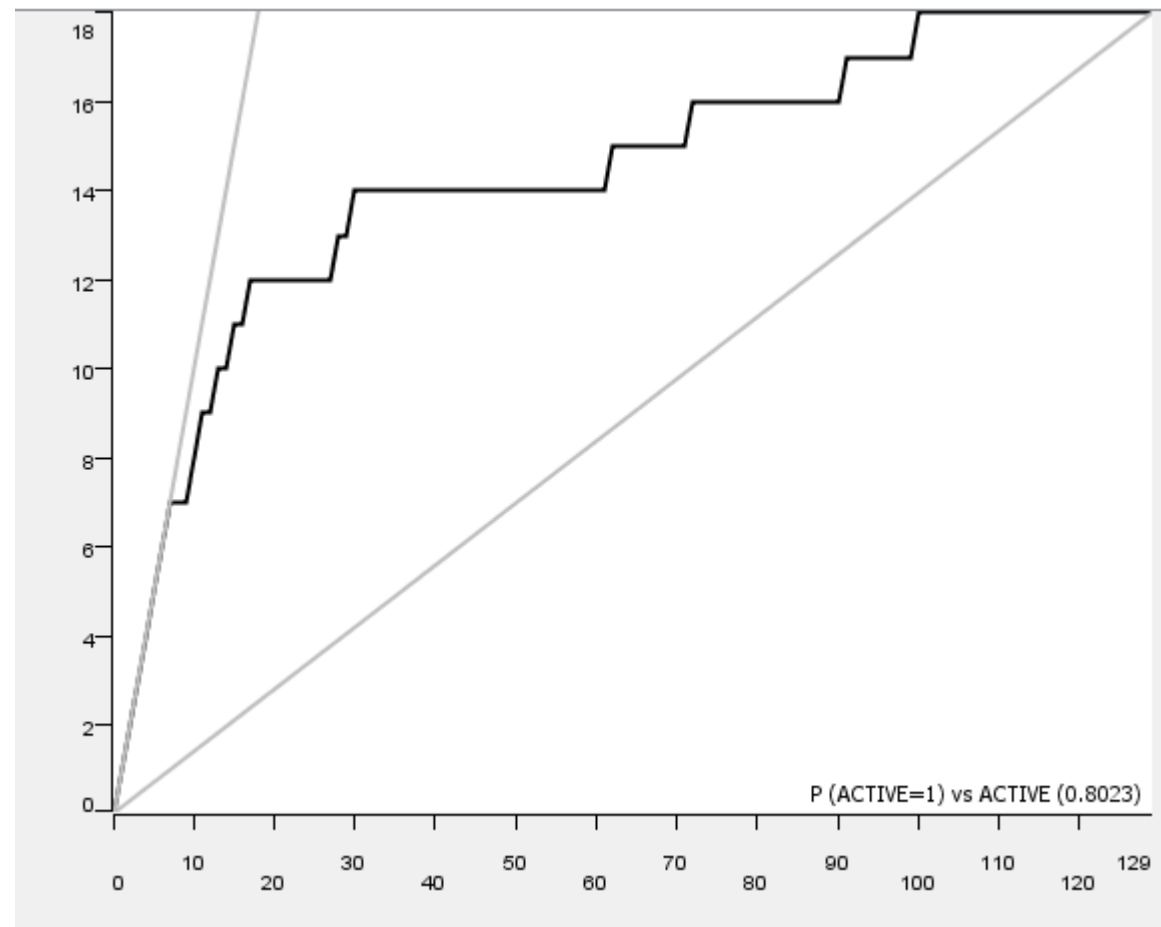

|          | Predicted Active | Predicted Inactive |
|----------|------------------|--------------------|
| Active   | 12               | 6                  |
| Inactive | 9                | 102                |

<15nM DefGood in beta-adren, 25% error;  
Random seed = 429

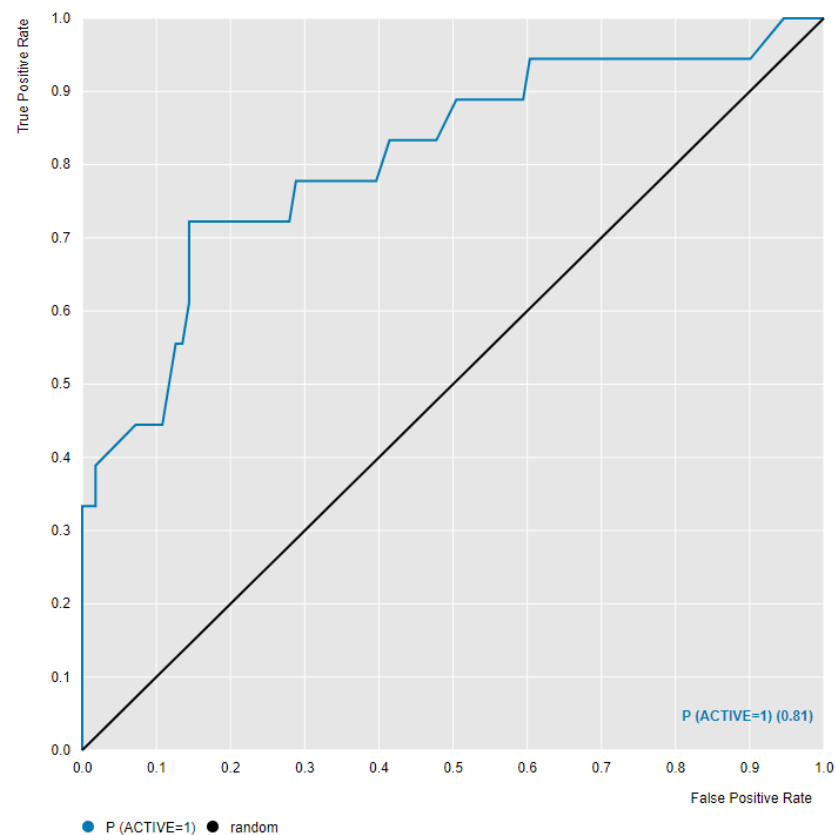

N=129

Top 10% Mean  
IC50

1,800 nM

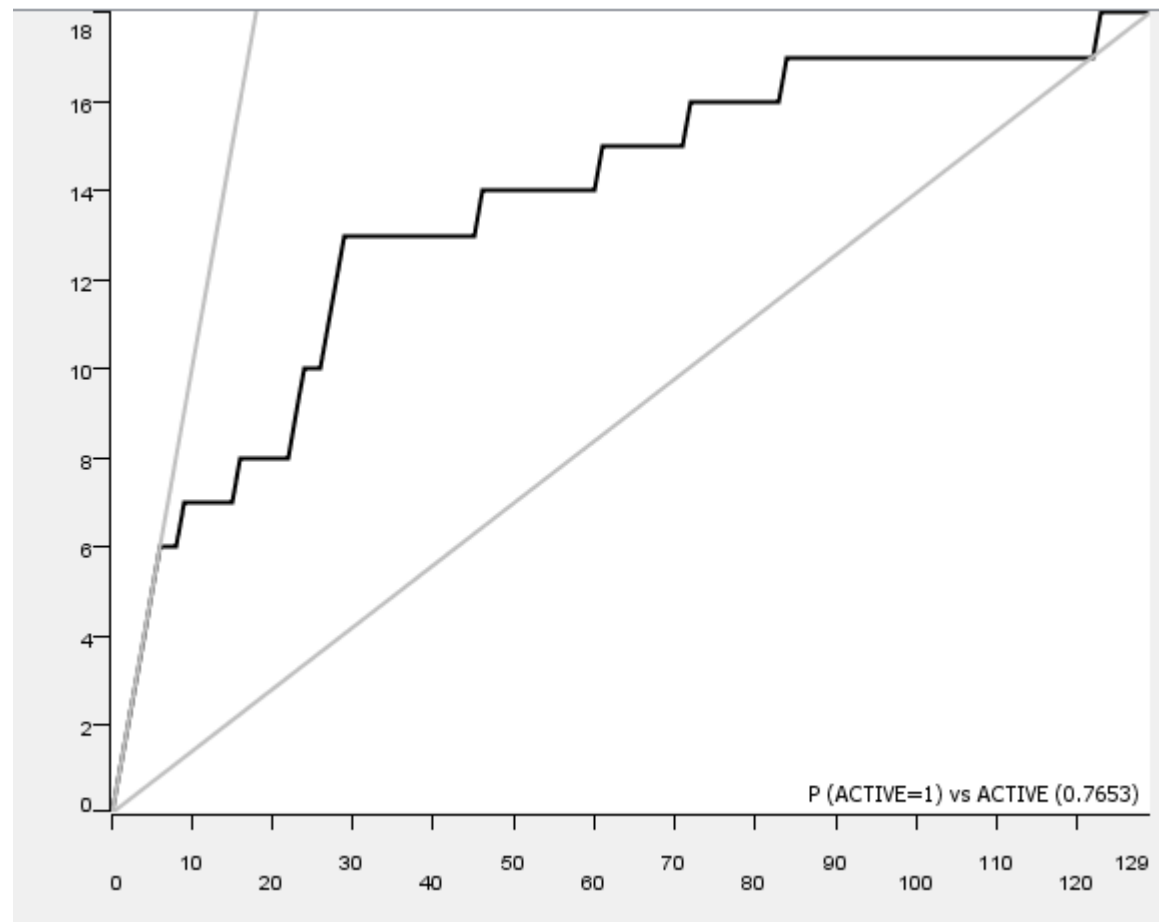

|          | Predicted Active | Predicted Inactive |
|----------|------------------|--------------------|
| Active   | 13               | 5                  |
| Inactive | 17               | 94                 |

<15nM DefGood in beta-adren, 10% error;  
Random seed = 121783

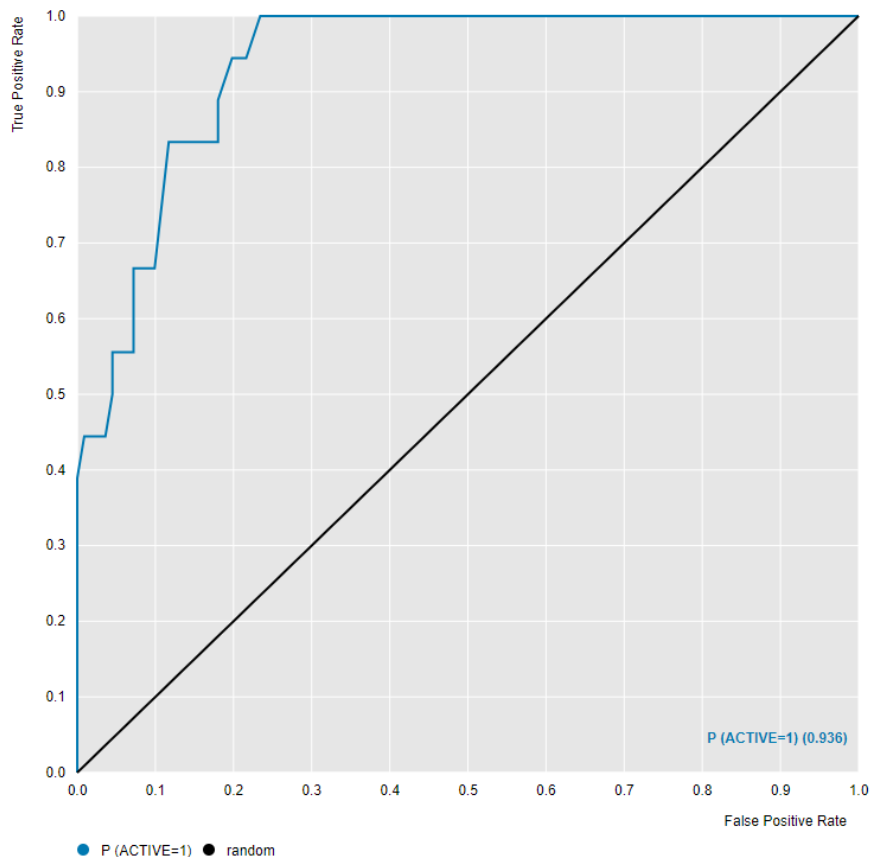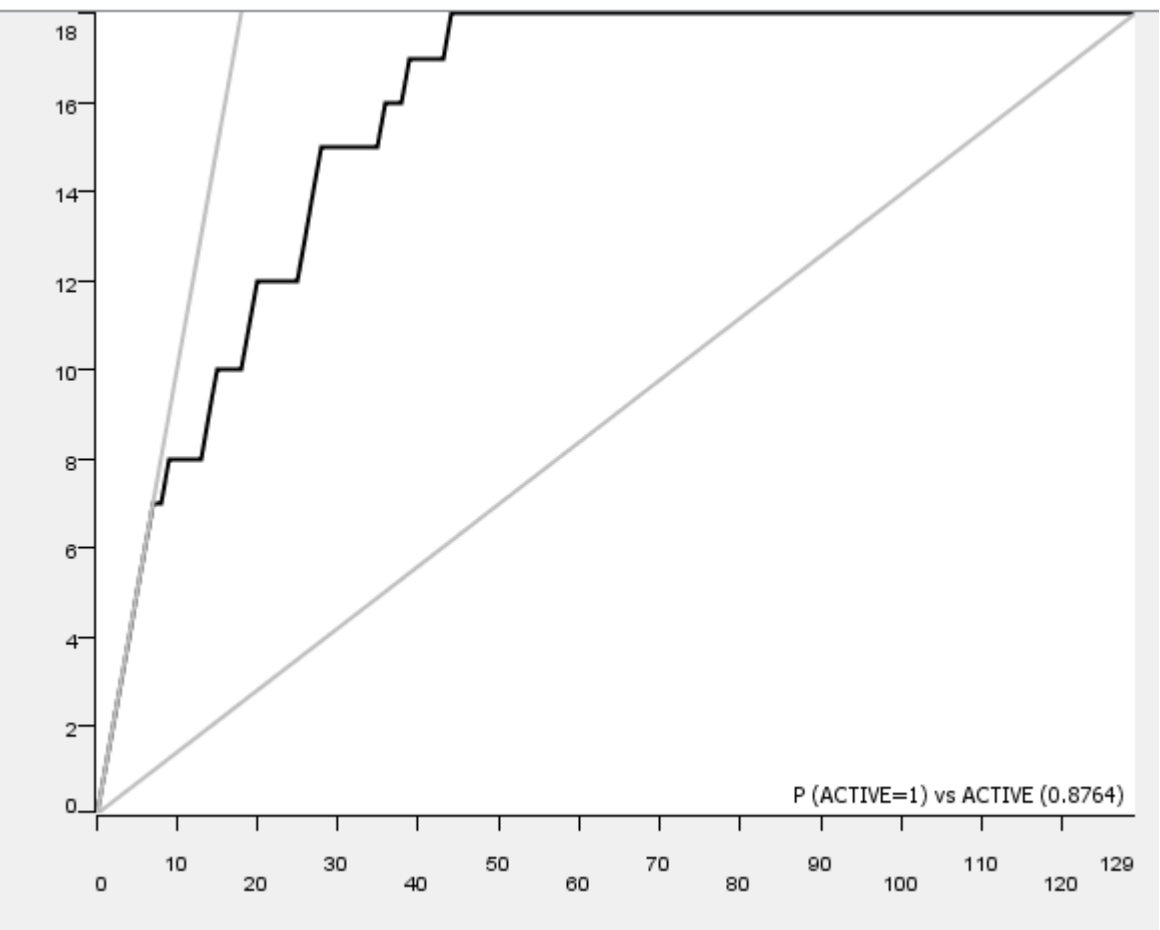

N=129

|                      |         |
|----------------------|---------|
| Top 10% Mean<br>IC50 | 32.7 nM |
|----------------------|---------|

|          | Predicted Active | Predicted Inactive |
|----------|------------------|--------------------|
| Active   | 10               | 8                  |
| Inactive | 7                | 104                |

<15nM DefGood in beta-adren, 20% error;  
Random seed = 121783

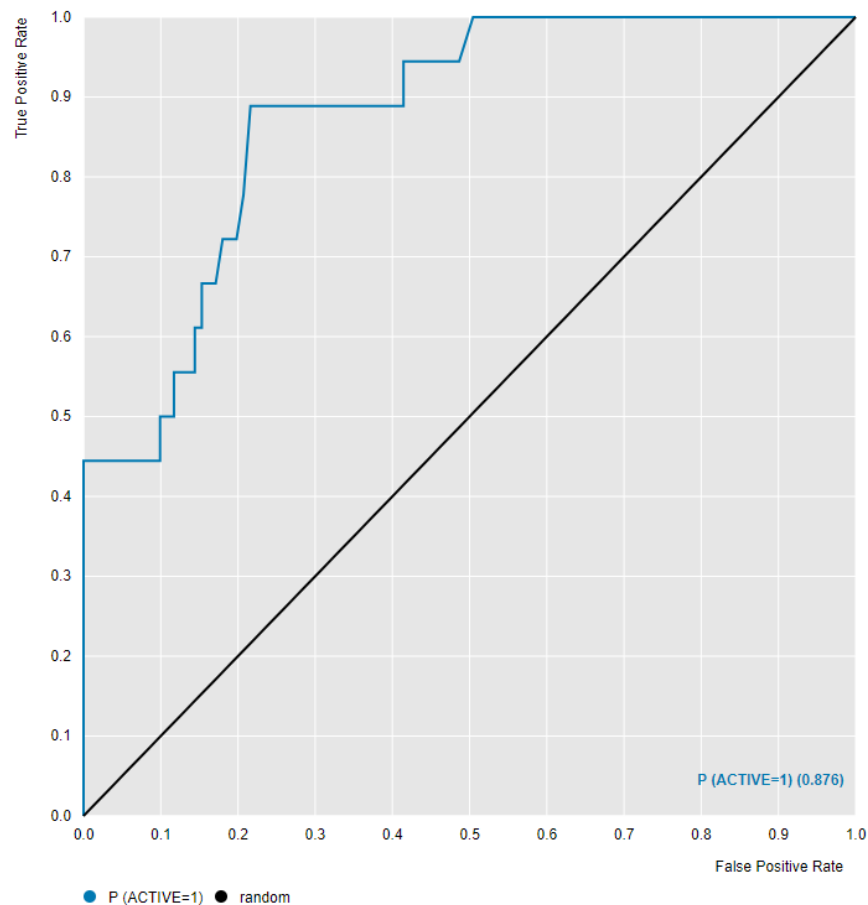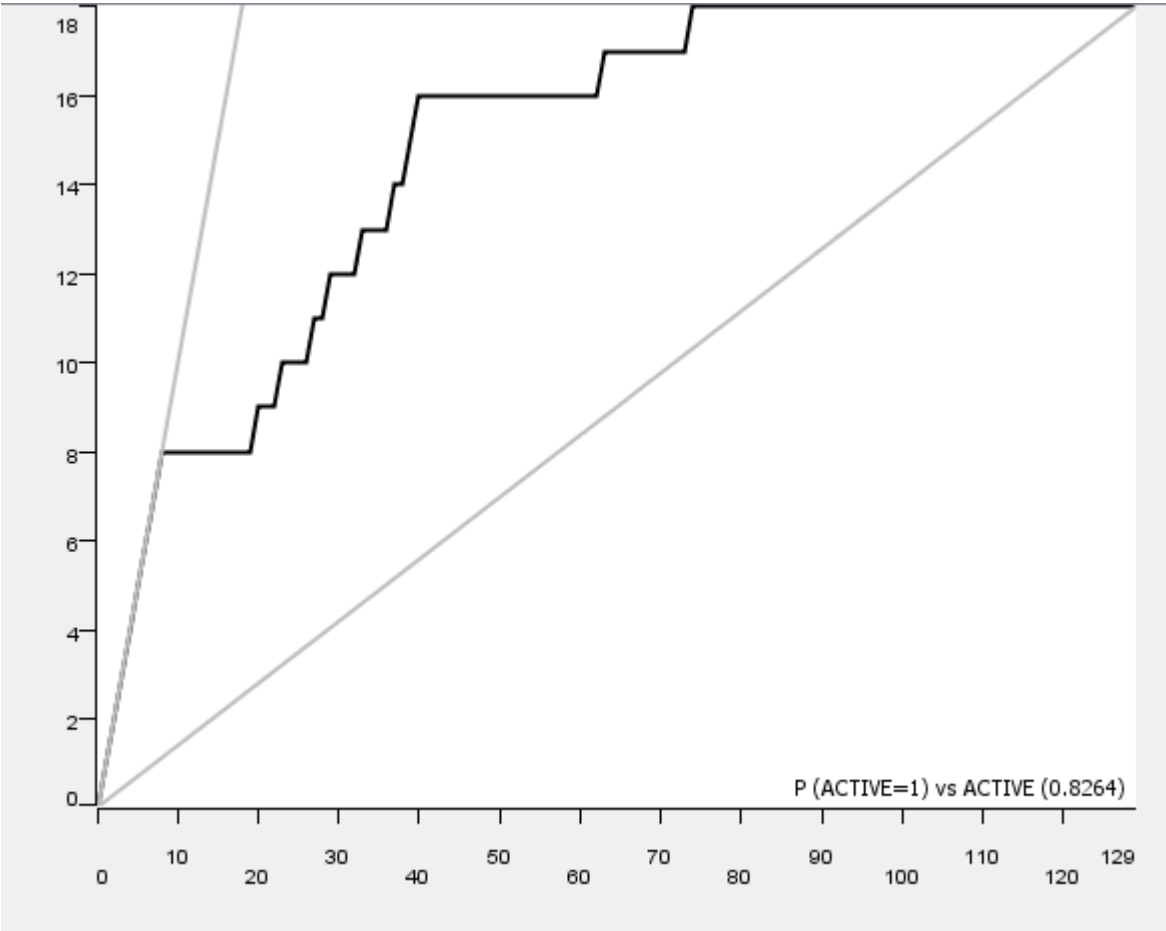

N=129

| Top 10% Mean IC50 | 91 nM |
|-------------------|-------|
|-------------------|-------|

|          | Predicted Active | Predicted Inactive |
|----------|------------------|--------------------|
| Active   | 10               | 8                  |
| Inactive | 13               | 98                 |

<15nM DefGood in beta-adren, 30% error;  
Random seed = 121783

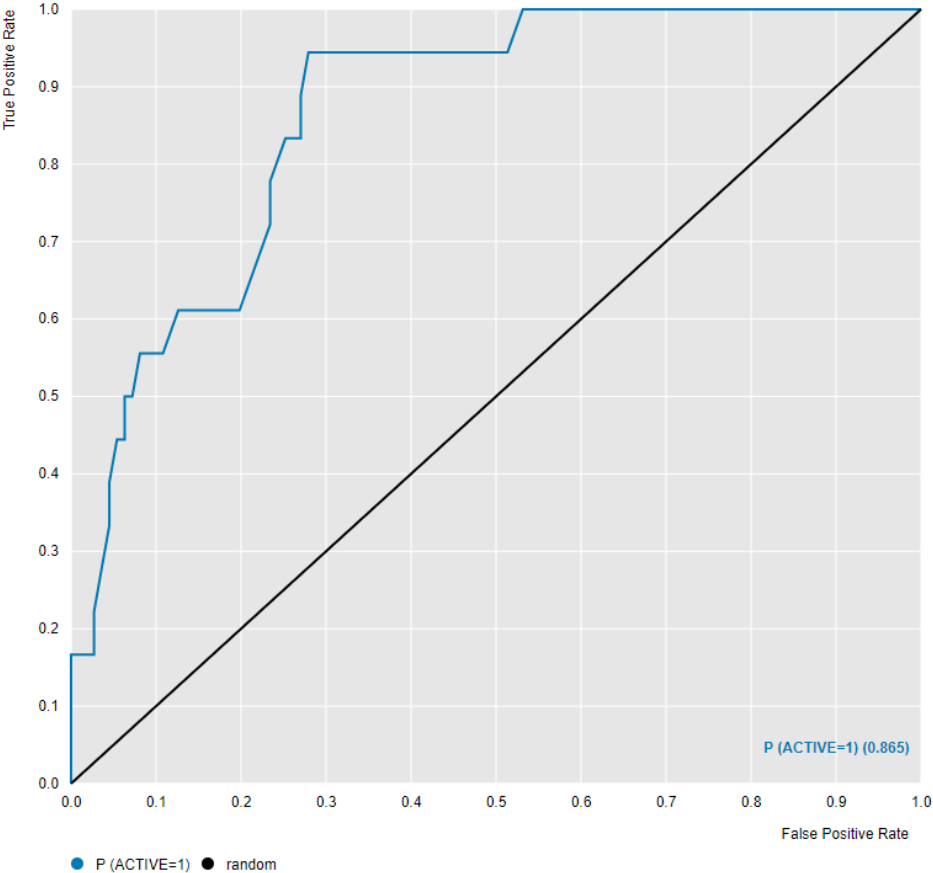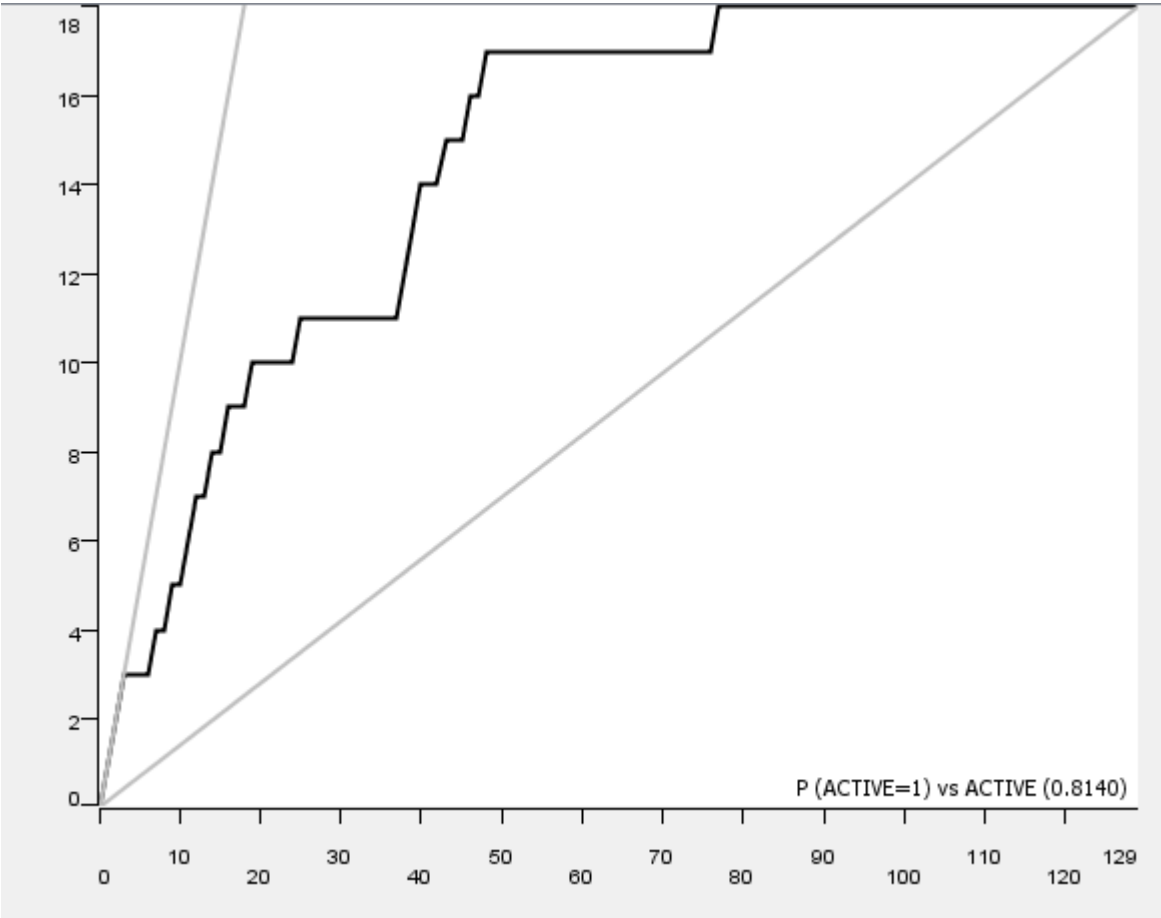

N=129

|                      |       |
|----------------------|-------|
| Top 10% Mean<br>IC50 | 63 nM |
|----------------------|-------|

|          | Predicted Active | Predicted Inactive |
|----------|------------------|--------------------|
| Active   | 11               | 7                  |
| Inactive | 15               | 96                 |



<15nM DefGood in beta-adren, 35% error;  
Random seed = 121783

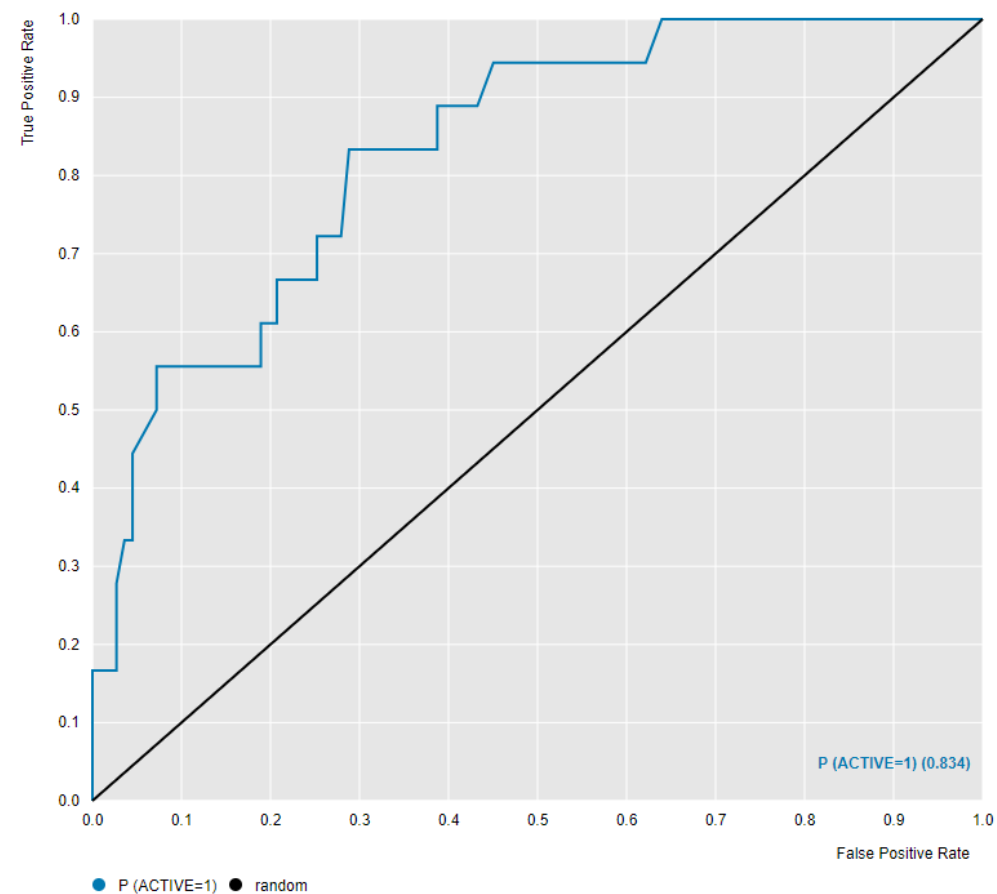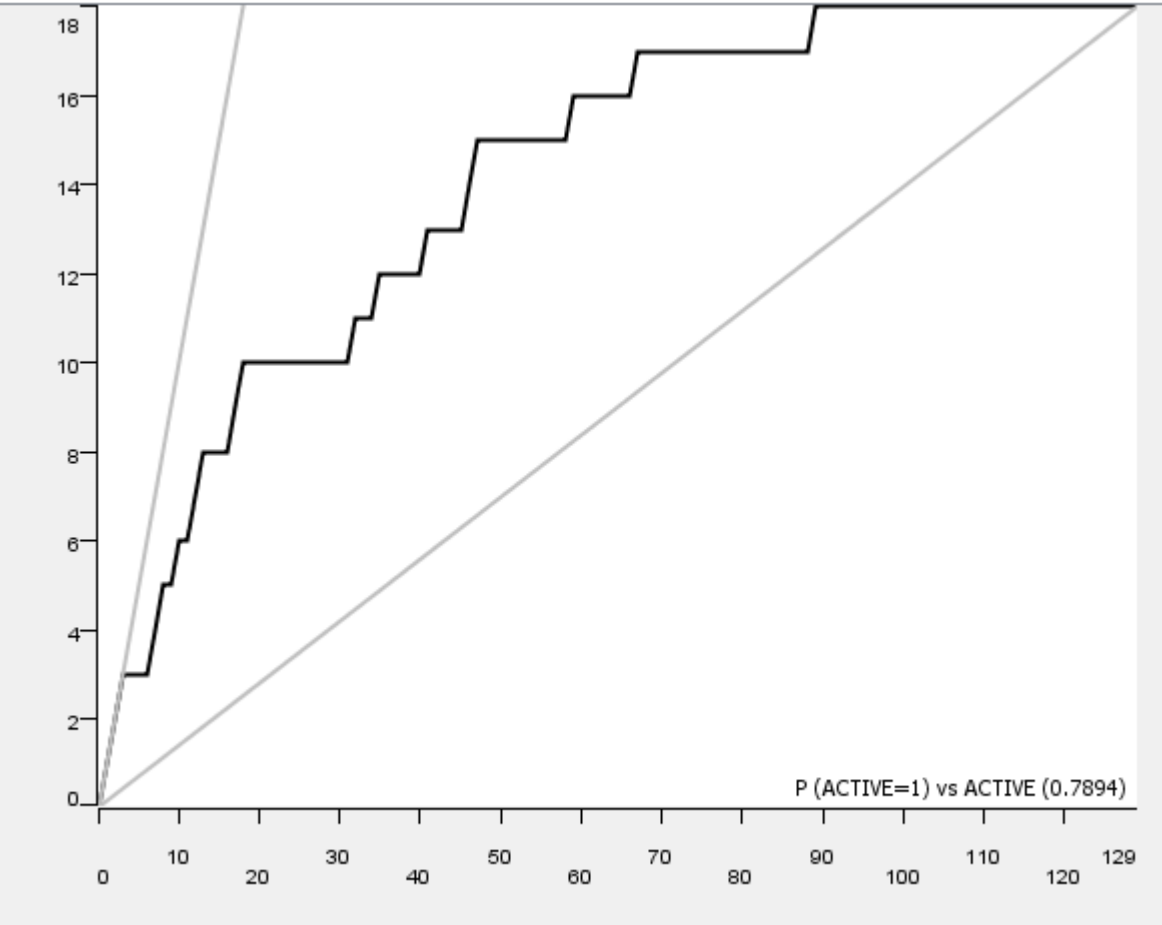

N=129

| Top 10% Mean IC50 | 110 nM |
|-------------------|--------|
|-------------------|--------|

|          | Predicted Active | Predicted Inactive |
|----------|------------------|--------------------|
| Active   | 12               | 6                  |
| Inactive | 26               | 85                 |

<15nM DefGood in beta-adren, 40% error;  
Random seed = 121783

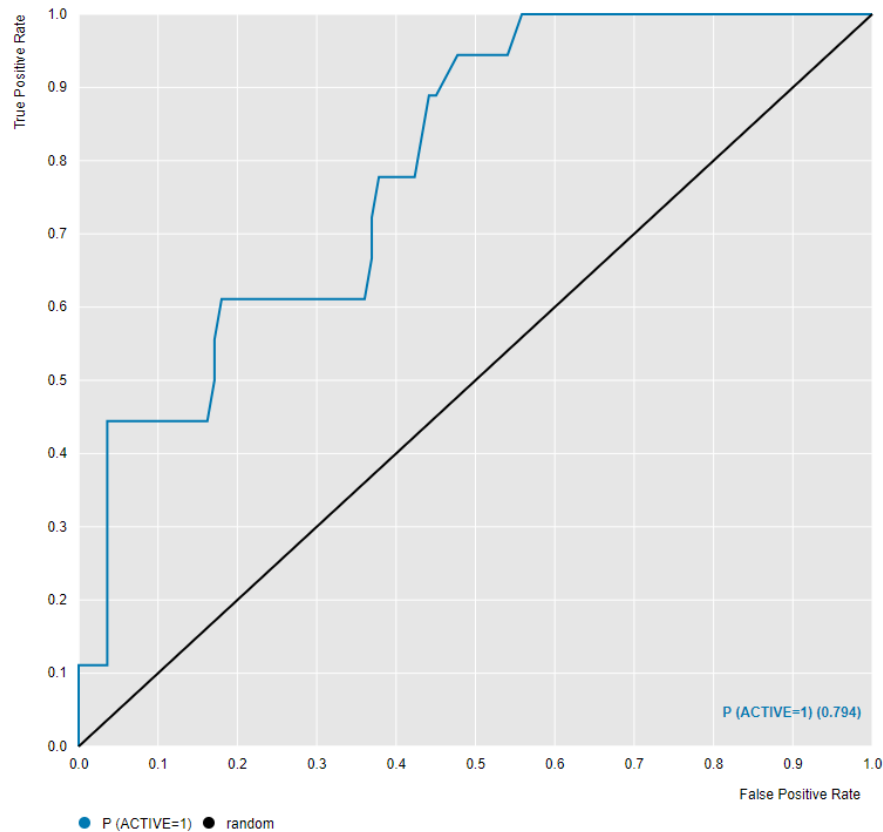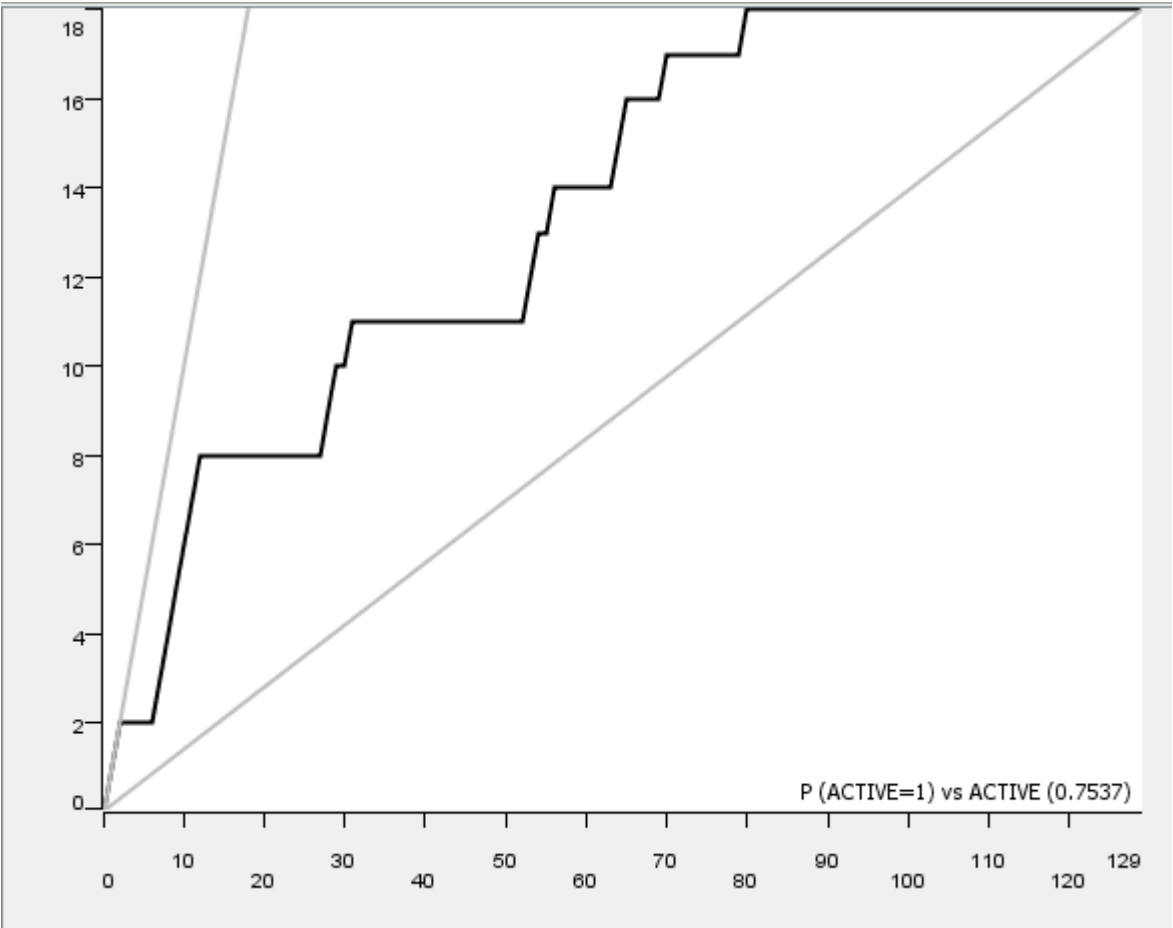

N=129

|                      |         |
|----------------------|---------|
| Top 10% Mean<br>IC50 | 58.2 nM |
|----------------------|---------|

|          | Predicted Active | Predicted Inactive |
|----------|------------------|--------------------|
| Active   | 11               | 7                  |
| Inactive | 26               | 85                 |

<15nM DefGood in beta-adren, 45% error;  
Random seed = 121783

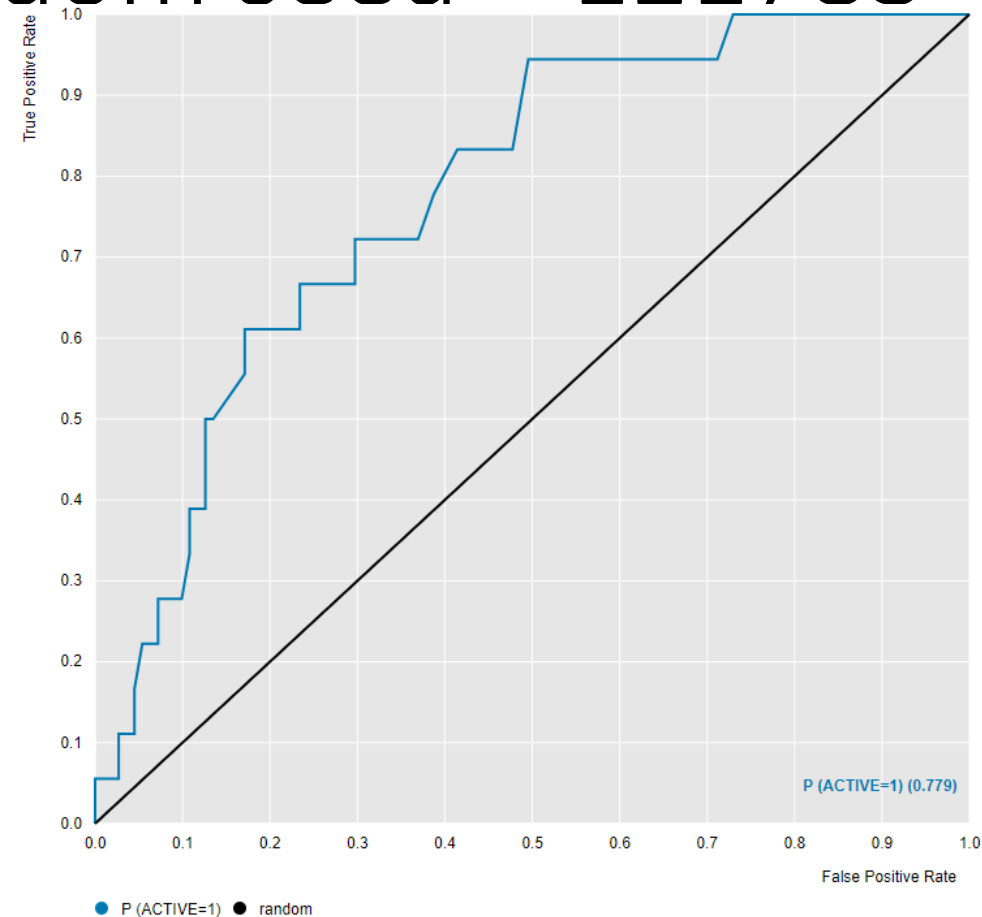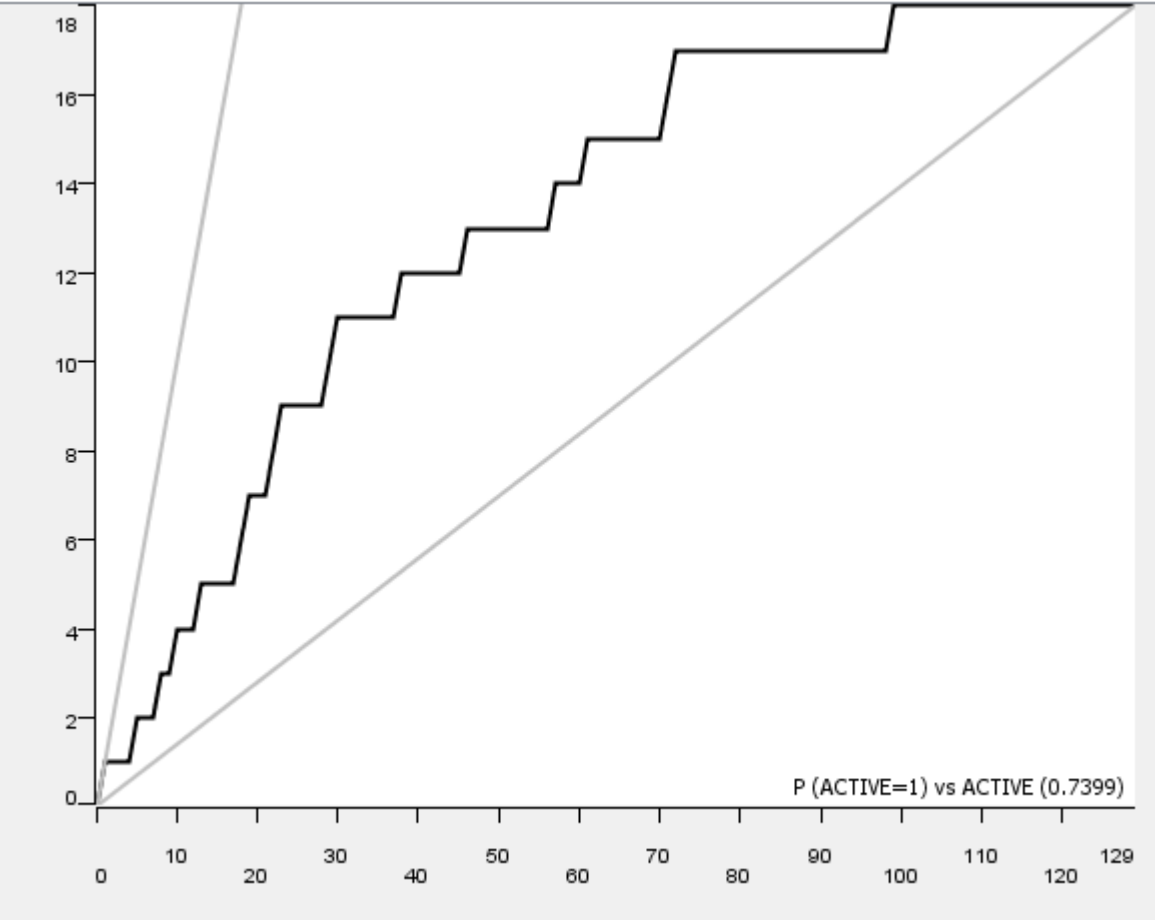

N=129

|                      |        |
|----------------------|--------|
| Top 10% Mean<br>IC50 | 771 nM |
|----------------------|--------|

|          | Predicted Active | Predicted Inactive |
|----------|------------------|--------------------|
| Active   | 12               | 6                  |
| Inactive | 33               | 78                 |

# Conclusion - RF

- A Random Forrest could be generated for  $\beta_2$  adrenergic receptor with a decision value of  $<15$  nM as defined as active. The predictivity of the algorithm could be preserved in three random train/test cycles as error was introduced in the training set. The point of failure was 35%, 25% and 45% error.

PNN- <15nM DefGood in beta-adren, 5%  
error ; Random seed = 1515533876005

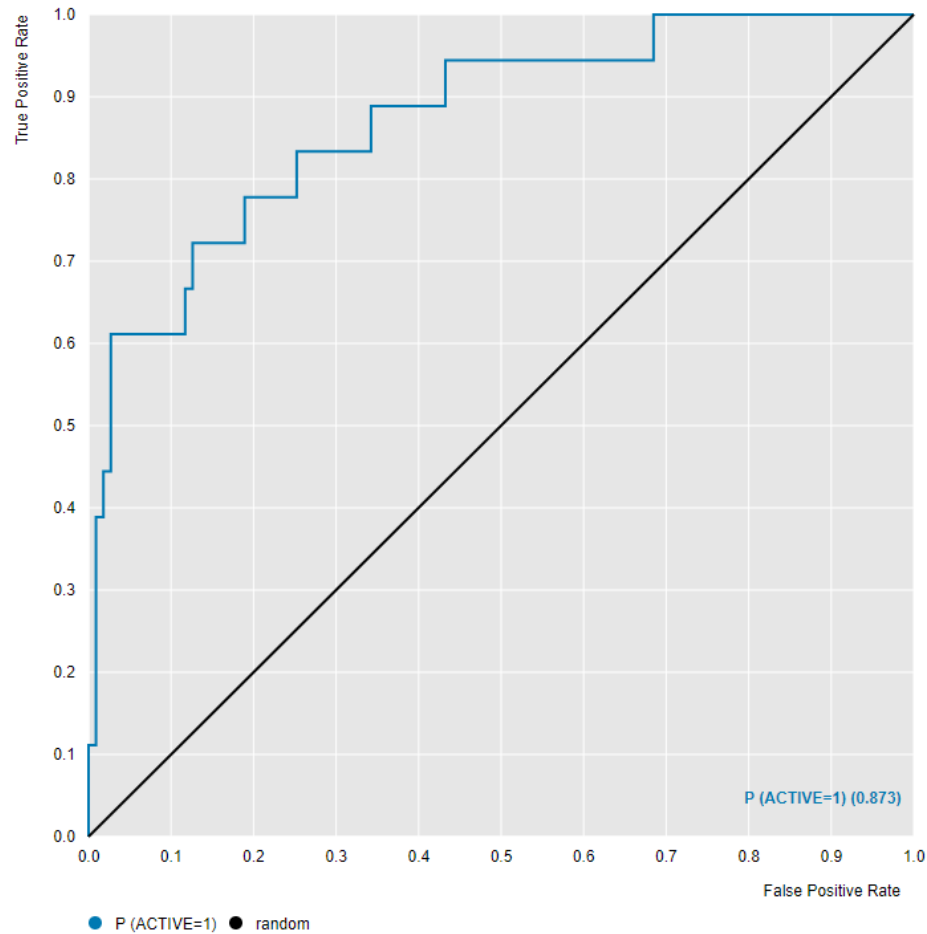

N=129

Top 10% Mean IC50

26.5 nM

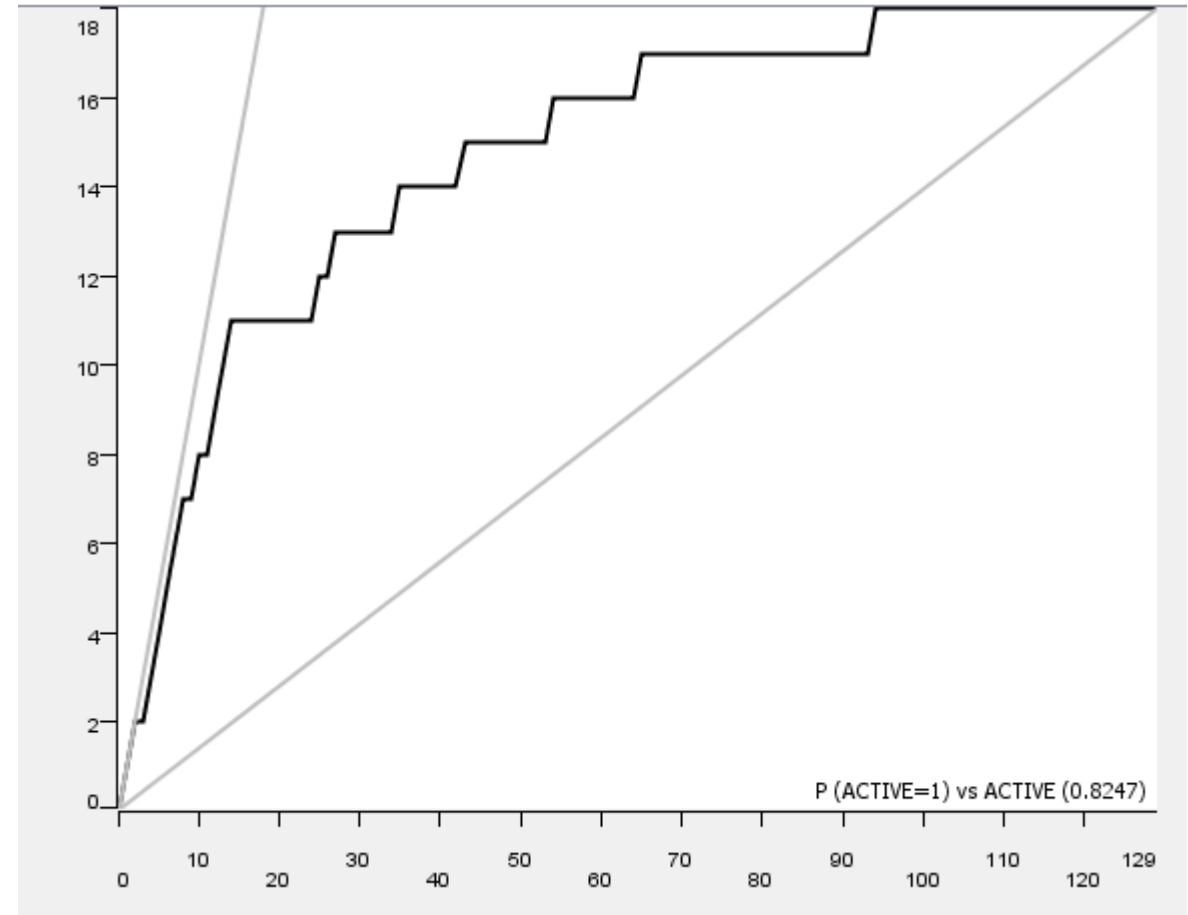

|          | Predicted Active | Predicted Inactive |
|----------|------------------|--------------------|
| Active   | 10               | 8                  |
| Inactive | 3                | 108                |

PNN- <15nM DefGood in beta-adren, 10%  
error ; Random seed = 1515533876005

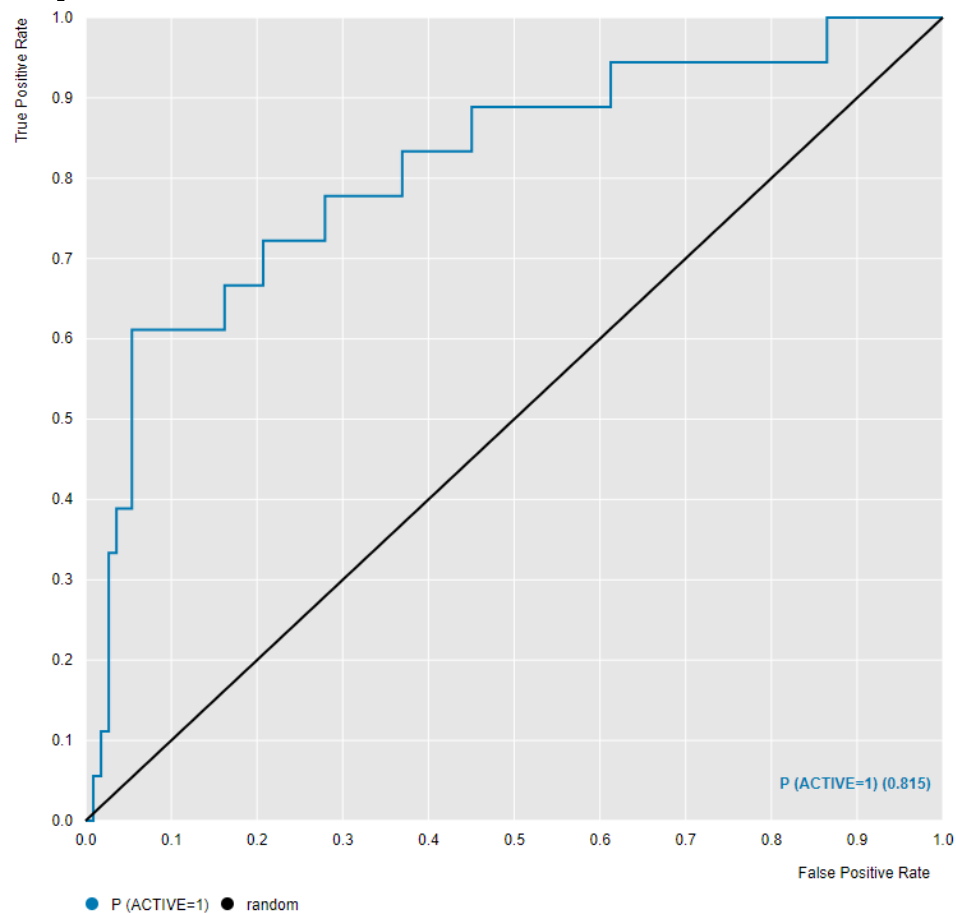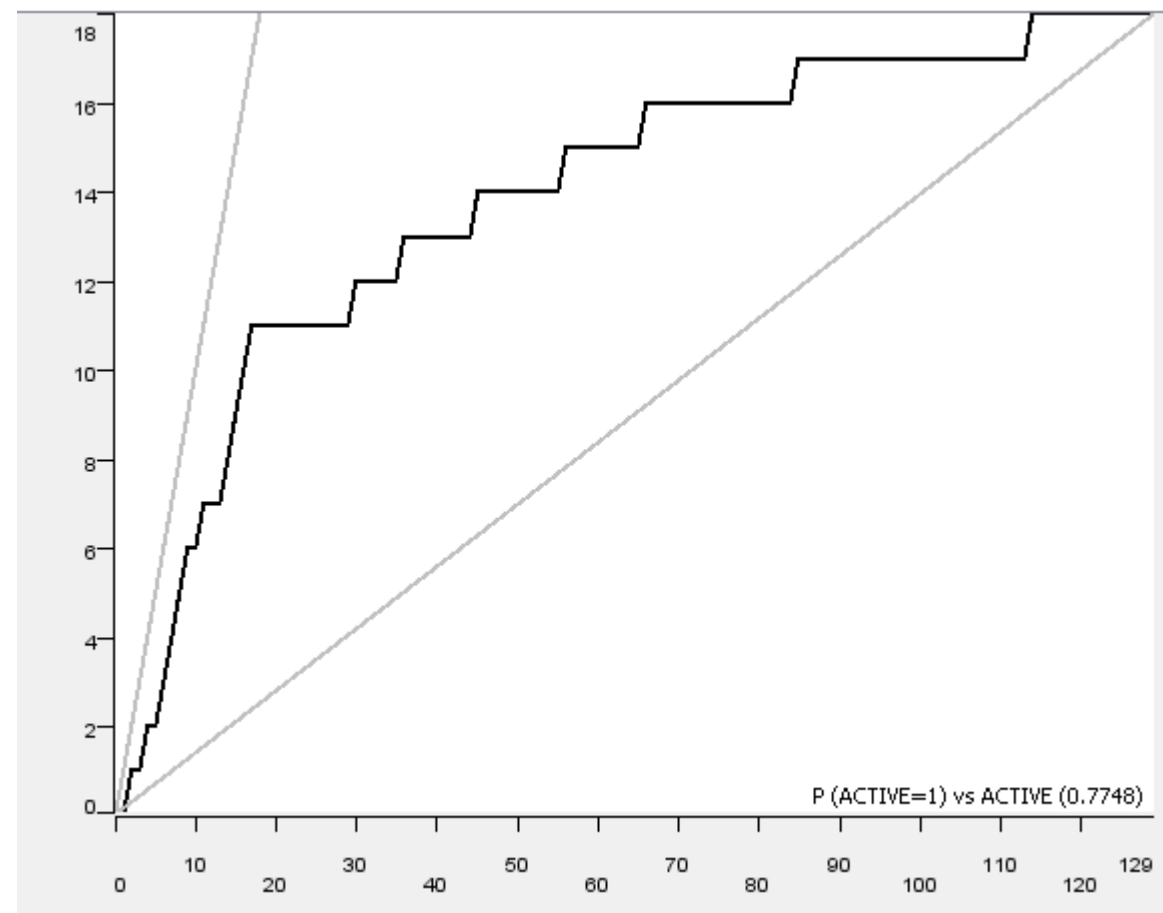

N=129

| Top 10% Mean IC50 | 1,100 nM |
|-------------------|----------|
|-------------------|----------|

|          | Predicted Active | Predicted Inactive |
|----------|------------------|--------------------|
| Active   | 10               | 8                  |
| Inactive | 6                | 105                |

PNN- <15nM DefGood in beta-adren, 5% error ; Random seed = 429

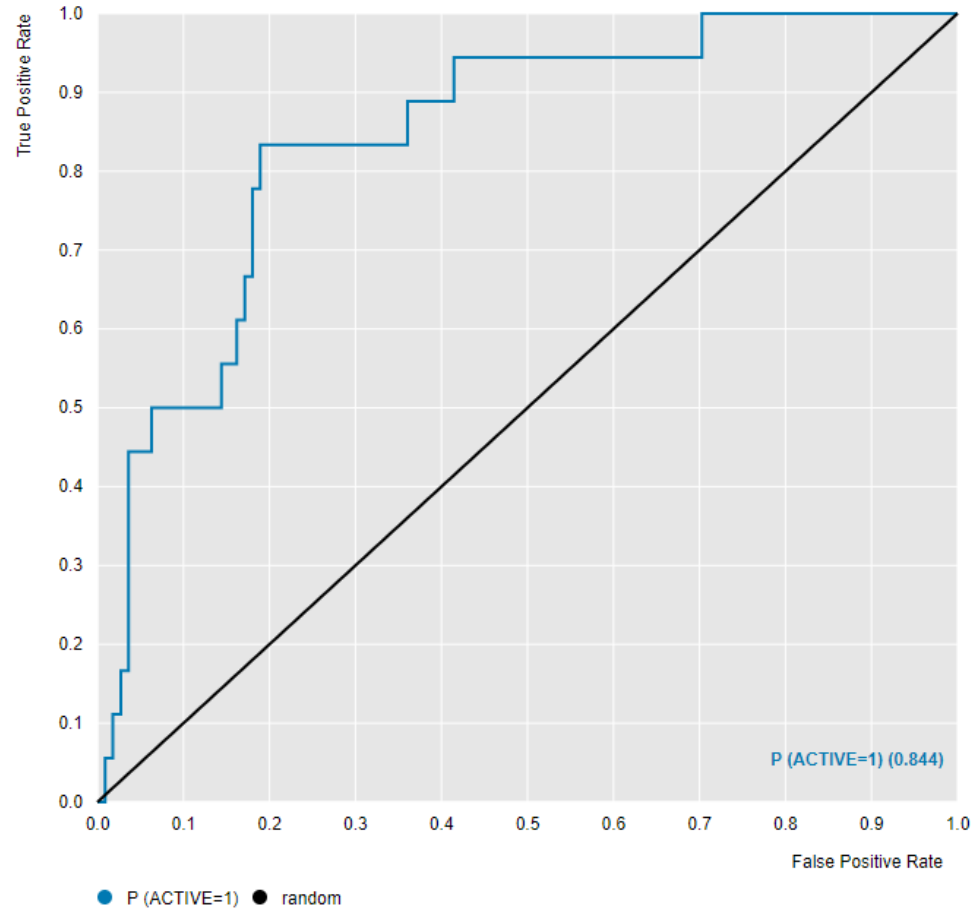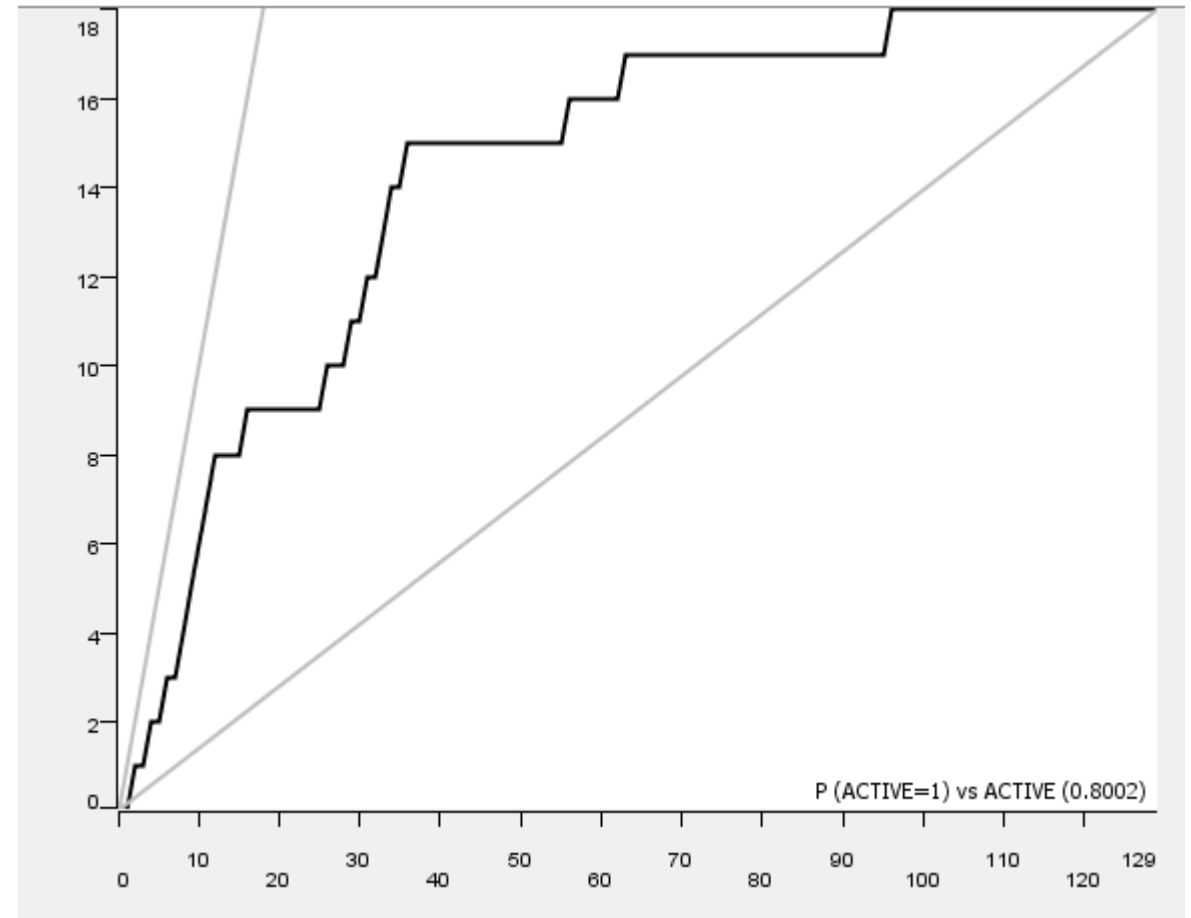

N=129

| Top 10% Mean IC50 | 21.7 nM |
|-------------------|---------|
|-------------------|---------|

|          | Predicted Active | Predicted Inactive |
|----------|------------------|--------------------|
| Active   | 8                | 10                 |
| Inactive | 7                | 104                |

PNN- <15nM DefGood in beta-adren, 10% error ; Random seed = 429

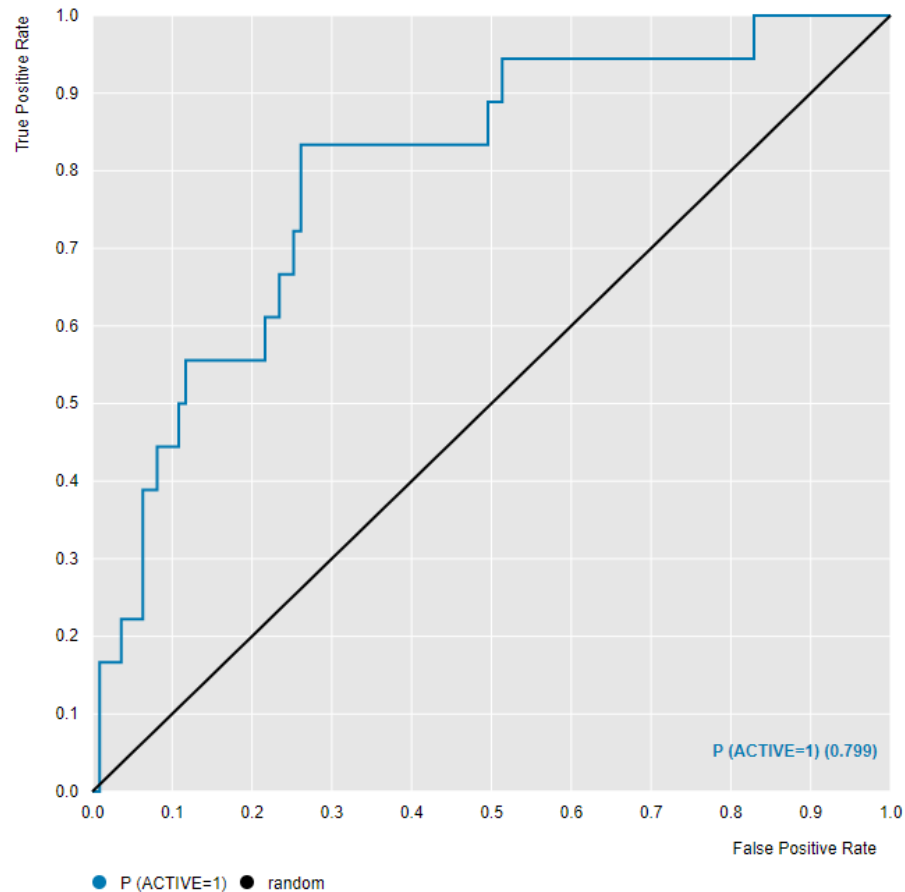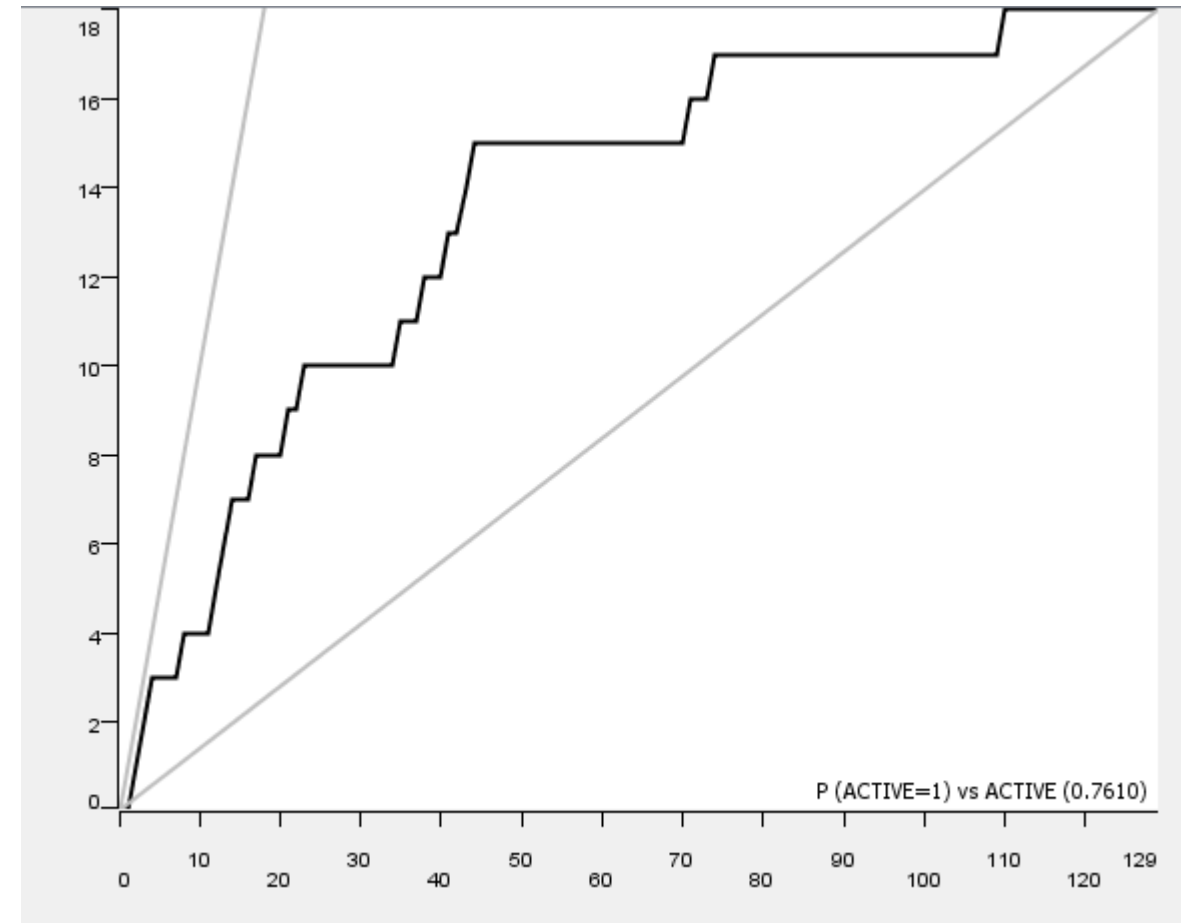

N=129

| Top 10% Mean IC50 | 150 nM |
|-------------------|--------|
|-------------------|--------|

|          | Predicted Active | Predicted Inactive |
|----------|------------------|--------------------|
| Active   | 8                | 10                 |
| Inactive | 11               | 100                |



PNN- <15nM DefGood in beta-adren, 15% error; Random seed = 429

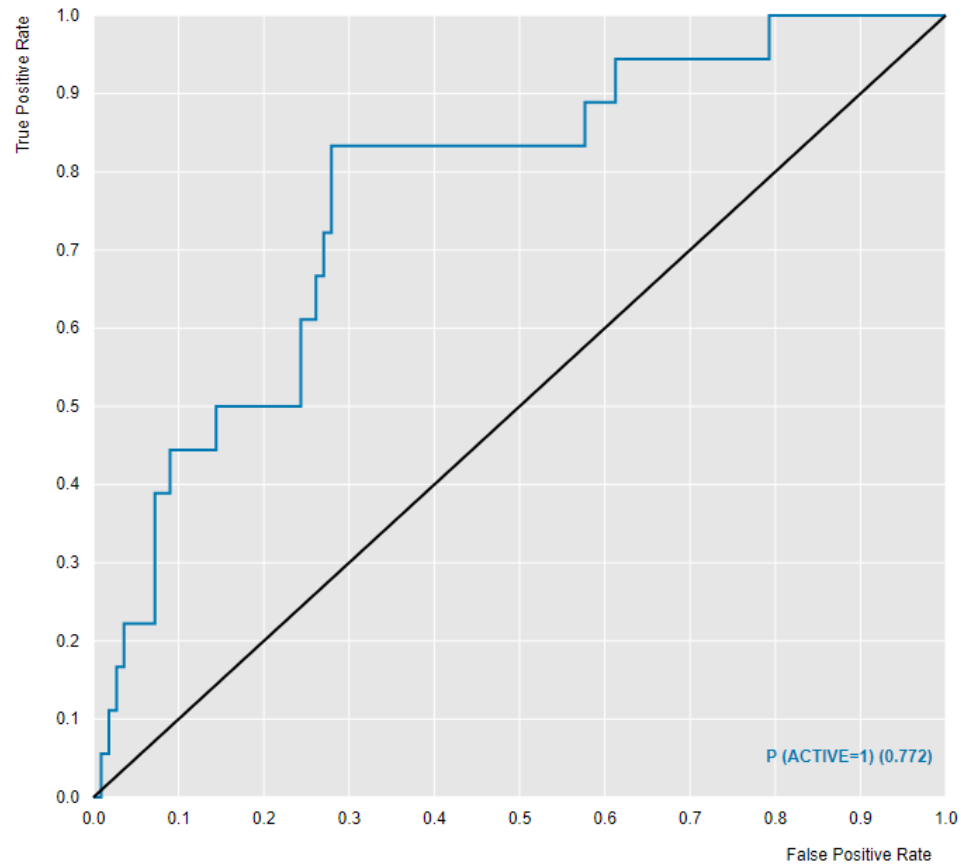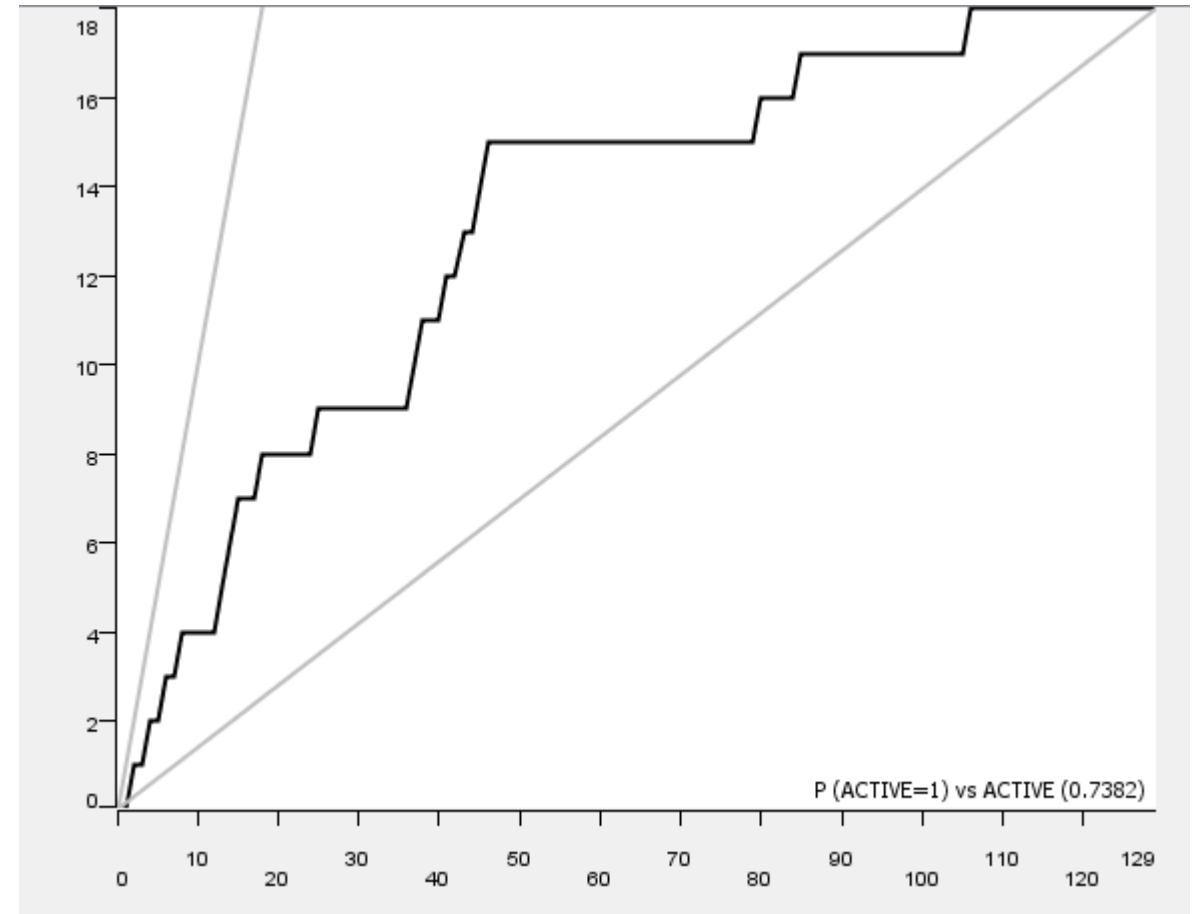

N=129

| Top 10% Mean IC50 | 184 nM |
|-------------------|--------|
|-------------------|--------|

|          | Predicted Active | Predicted Inactive |
|----------|------------------|--------------------|
| Active   | 8                | 10                 |
| Inactive | 12               | 99                 |

# PNN-<15nM DefGood in beta-adren, 20% error ; Random seed = 429

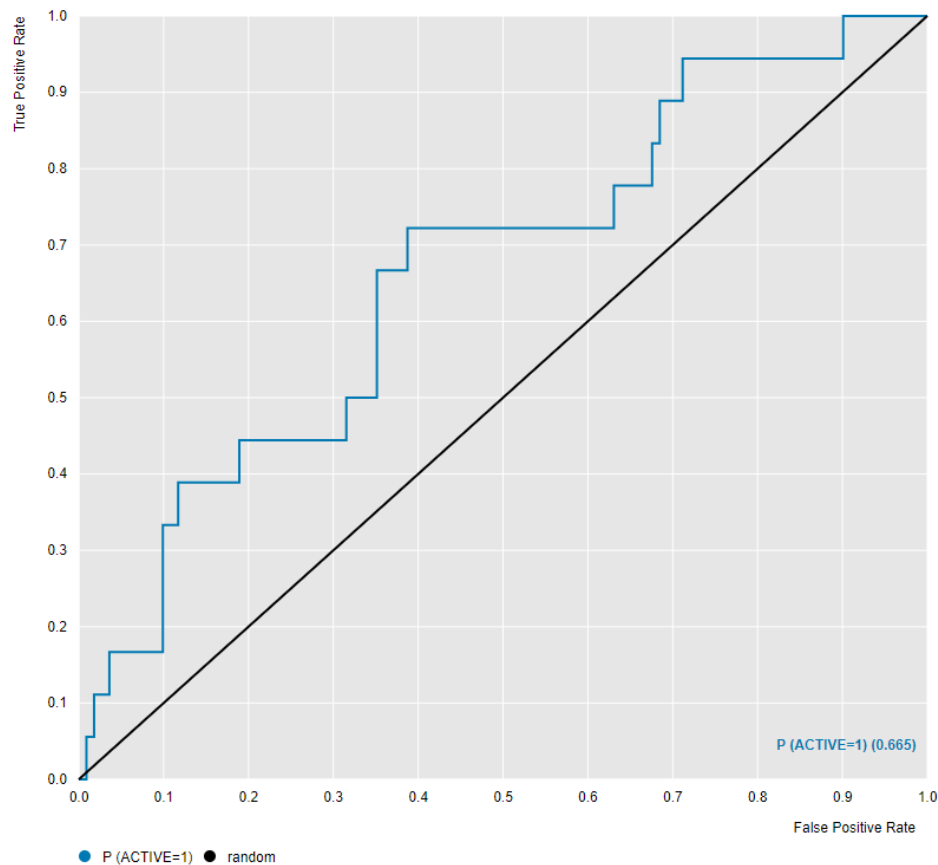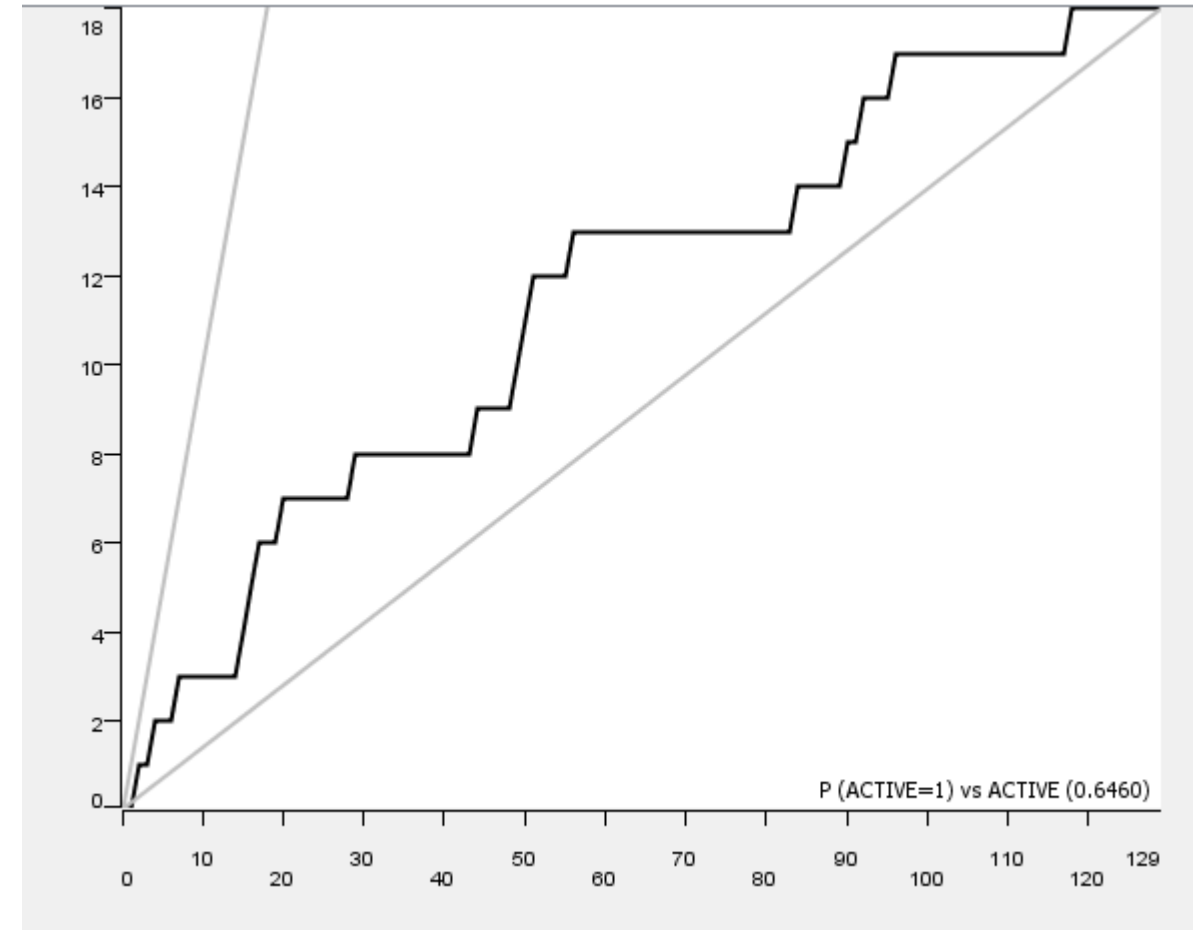

N=129

Top 10% Mean IC50

130,000 nM

|          | Predicted Active | Predicted Inactive |
|----------|------------------|--------------------|
| Active   | 7                | 11                 |
| Inactive | 16               | 95                 |

PNN - <15nM DefGood in beta-adren, 5% error; Random seed = 121783

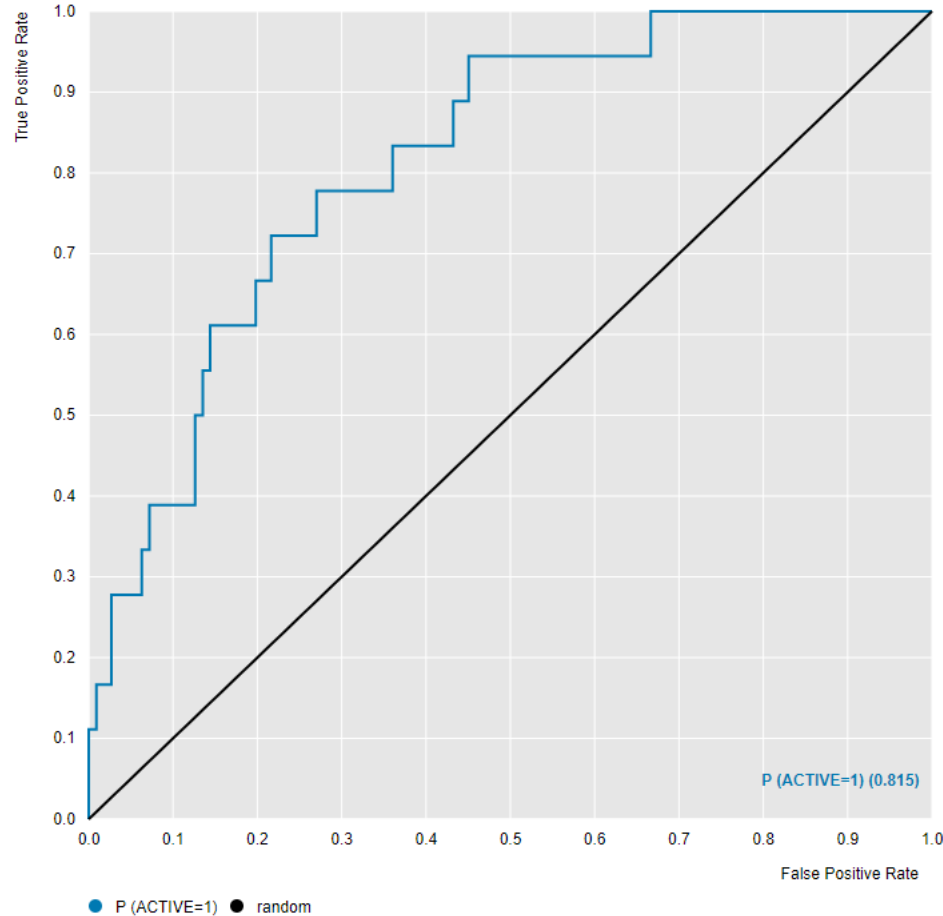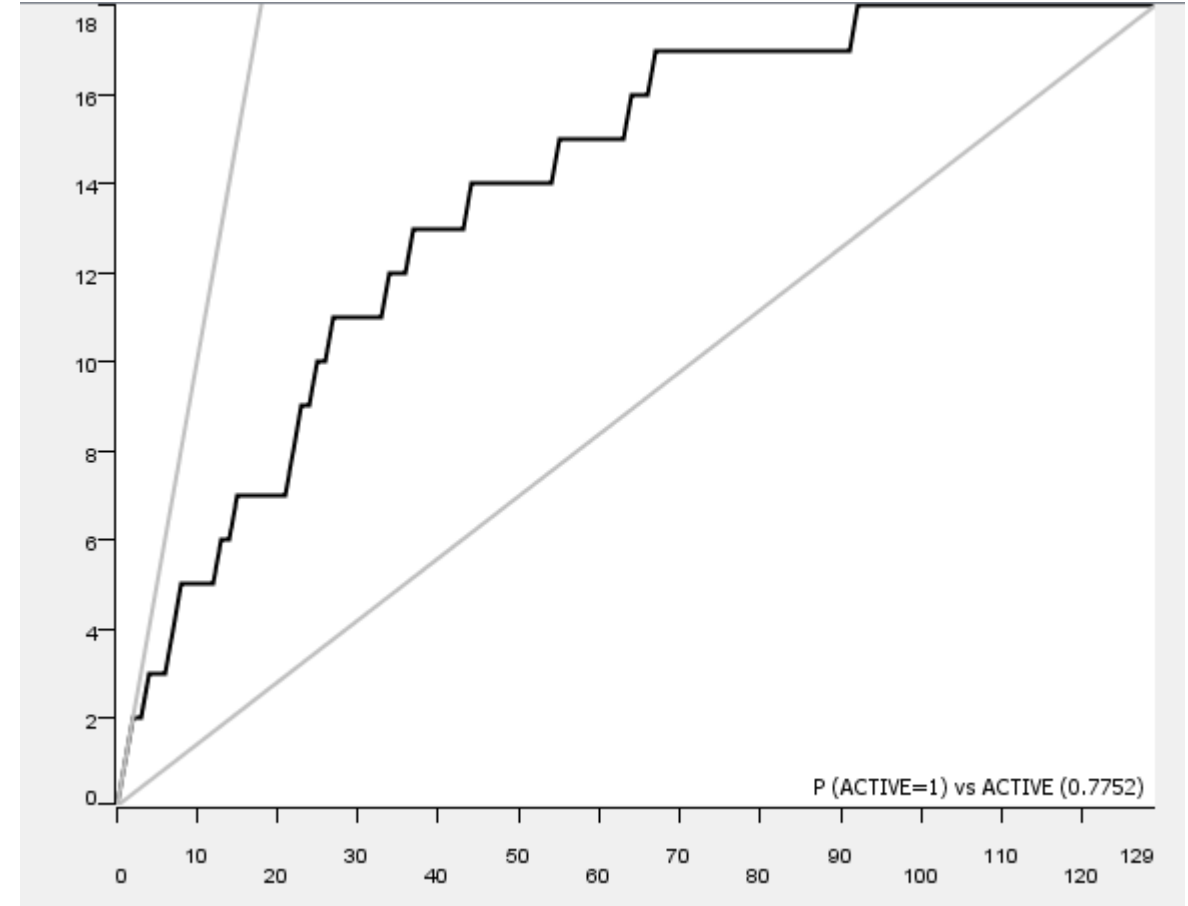

N=129

| Top 10% Mean IC50 | 1,900 nM |
|-------------------|----------|
|-------------------|----------|

|          | Predicted Active | Predicted Inactive |
|----------|------------------|--------------------|
| Active   | 7                | 11                 |
| Inactive | 11               | 100                |

PNN - <15nM DefGood in beta-adren, 5% error; Random seed = 121783  
(reparameterized Theta minus = 0.55; theta plus = 0.95)

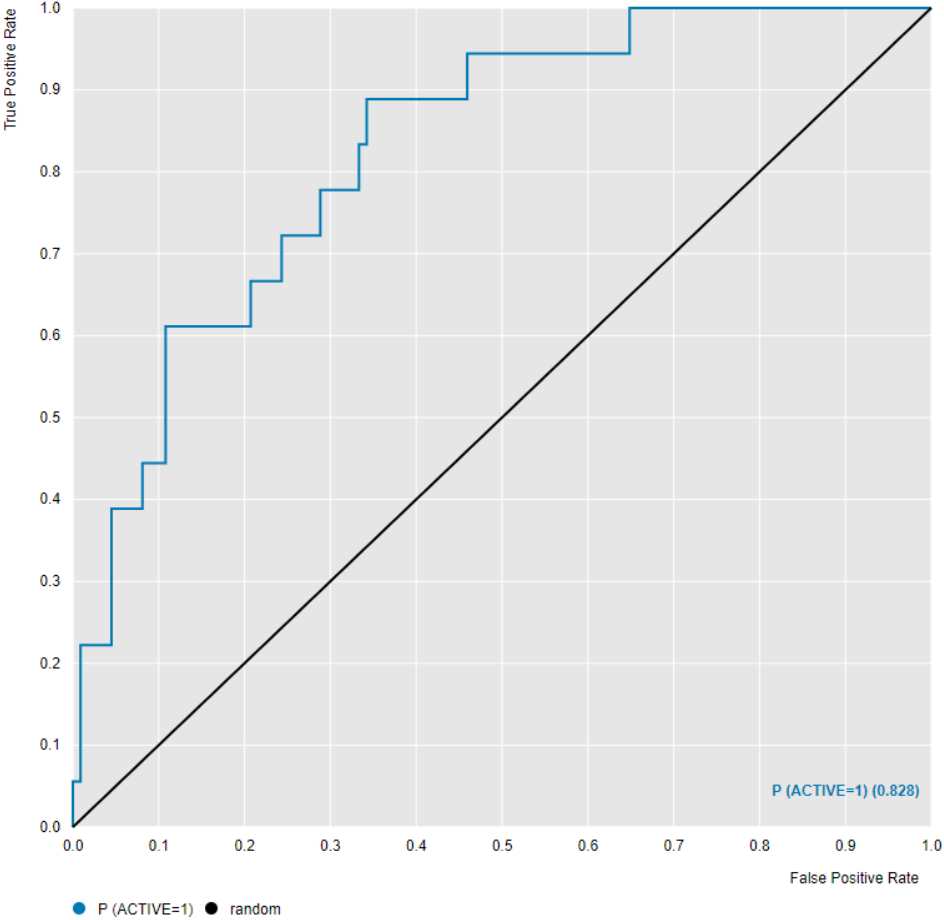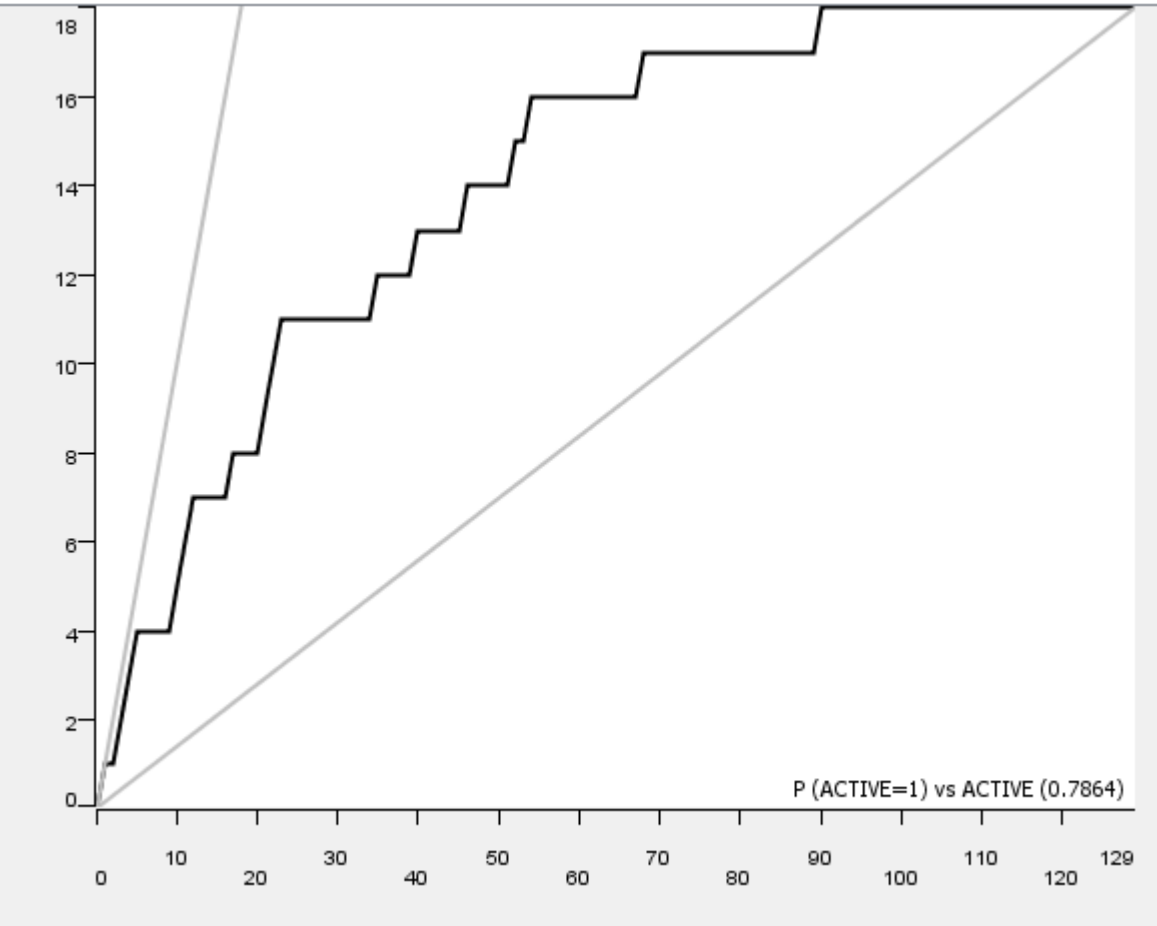

N=129

|                   |          |
|-------------------|----------|
| Top 10% Mean IC50 | 1,100 nM |
|-------------------|----------|

|          | Predicted Active | Predicted Inactive |
|----------|------------------|--------------------|
| Active   | 7                | 11                 |
| Inactive | 6                | 105                |

PNN - <15nM DefGood in beta-adren, 10% error; Random seed = 121783

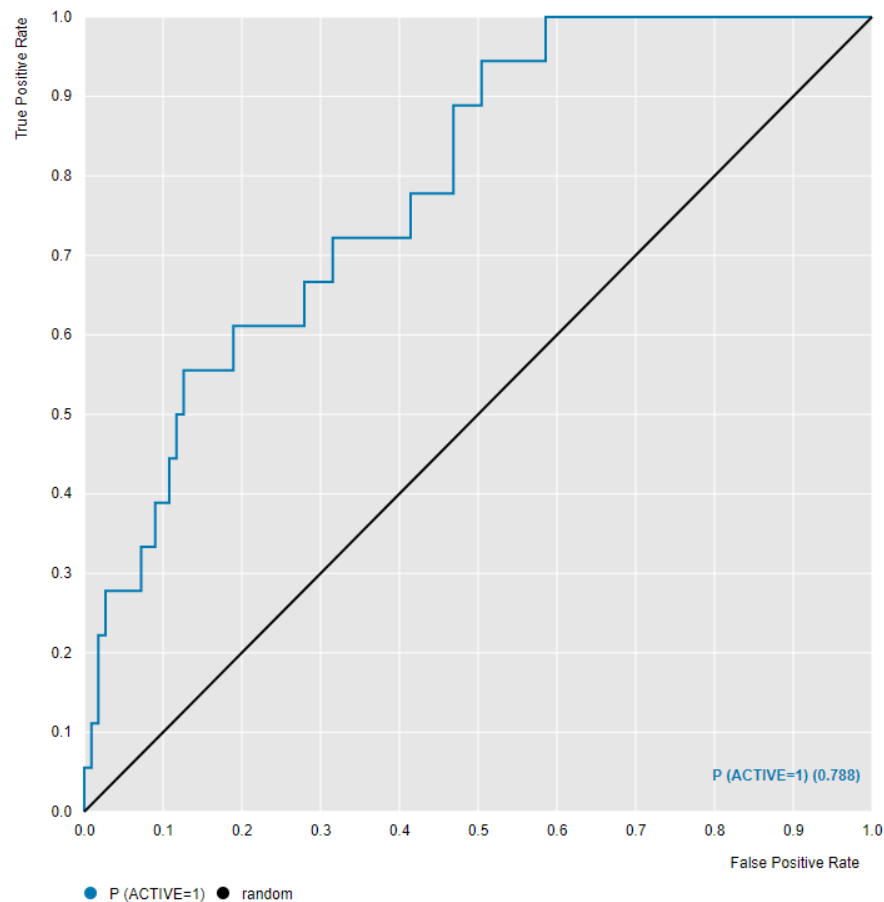

N=129

| Top 10% Mean IC50 | 1,200 nM |
|-------------------|----------|
|-------------------|----------|

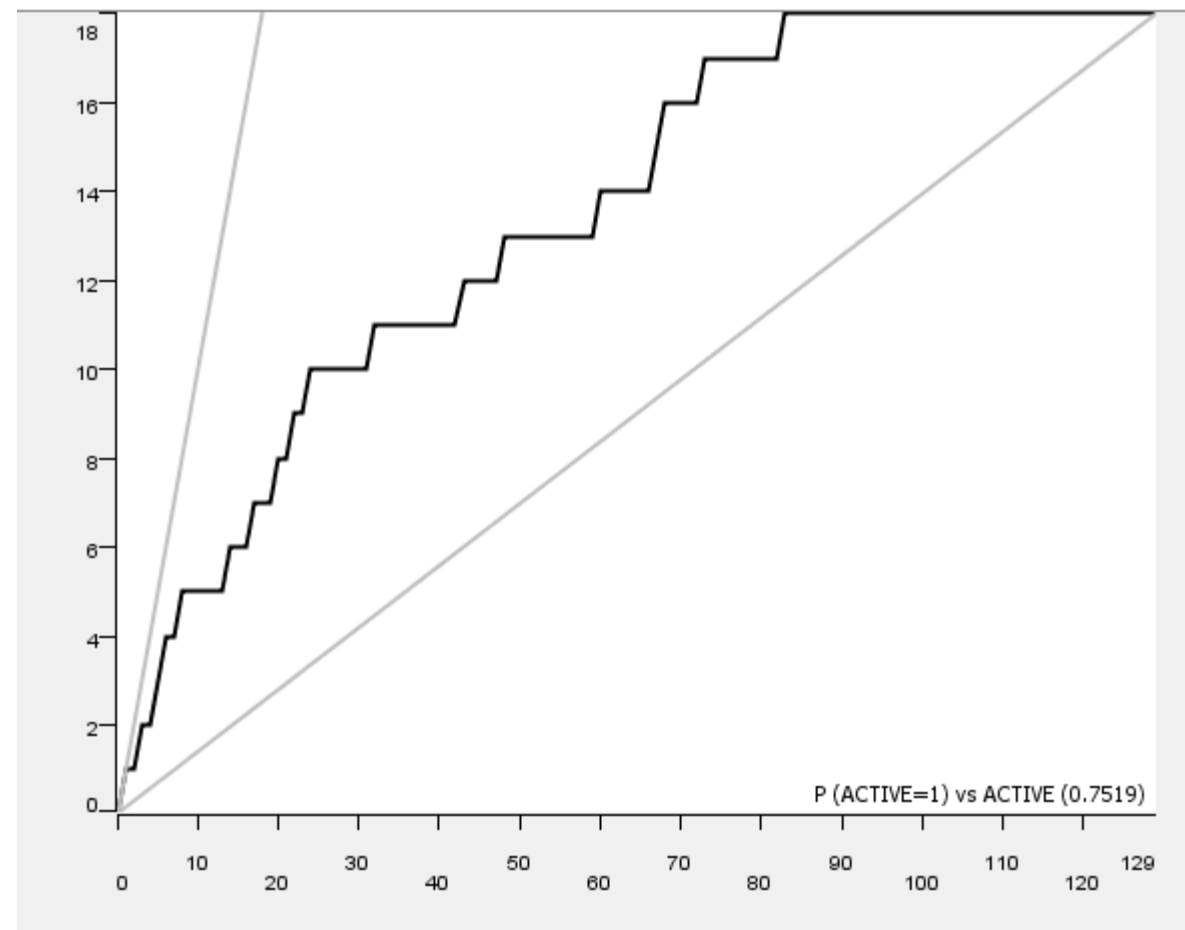

|          | Predicted Active | Predicted Inactive |
|----------|------------------|--------------------|
| Active   | 7                | 11                 |
| Inactive | 10               | 101                |

# Conclusion - PNN

- Across three random seeds, the % error that lead to a significant enrichment failure and/or top 10% IC50 increase in the retrospective test was 10%, 20% and 5% for each unique random seed.

c-Abl

# C-Abl NBN Design

- Rules -  $\$RELATION\$ = "="$  OR  $\$IC50\$ > 999$  OR  $\$IC50\$ < 10 \Rightarrow TRUE$
- Sort ascending and remove duplicates
- DefGood scanned between 5 and 25 nM
- 80-20 split for both actives and inactives
- NBN – ECFP4 used Classifier where Prediction was Active = True
- Resulted in 1439 compounds after cleaning



# <5 nM DefGood in c-Abl

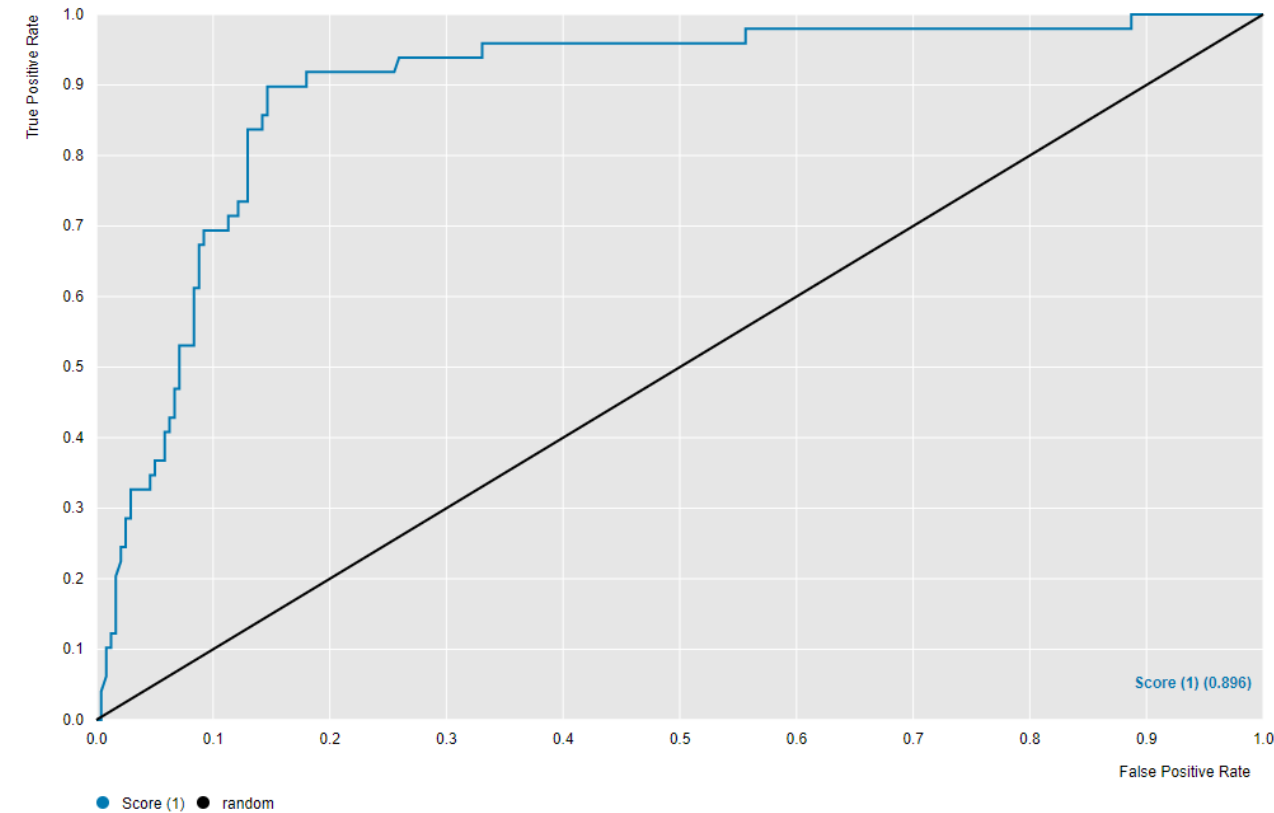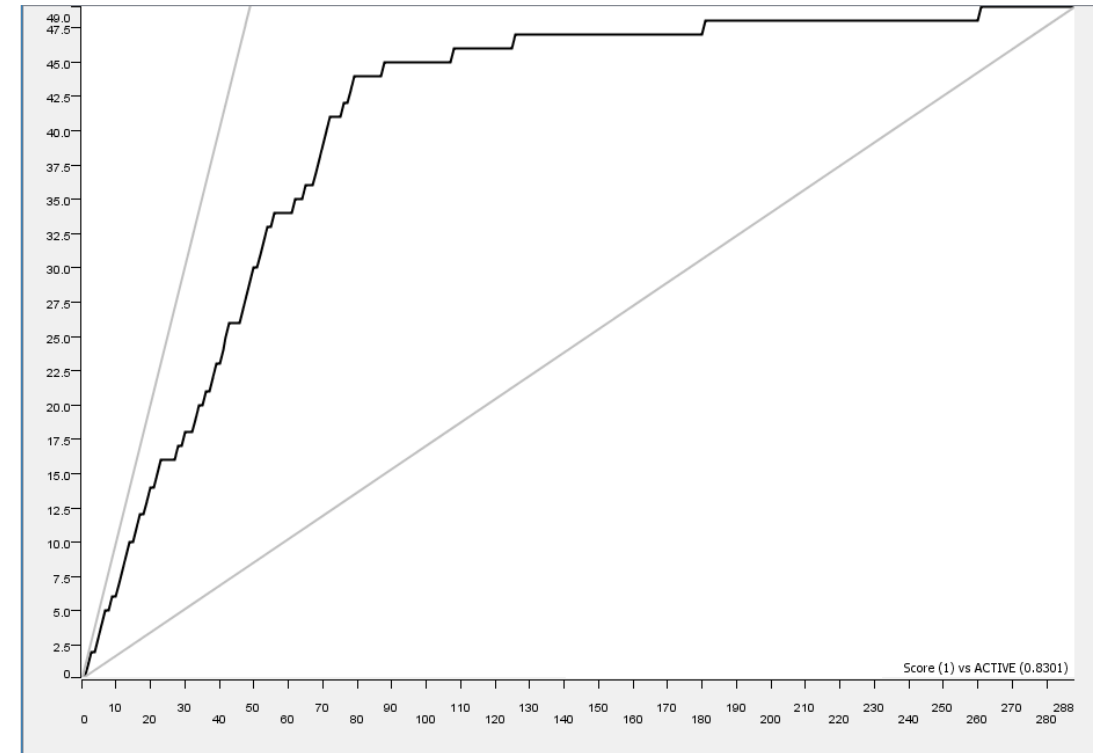

N=289

|                      |        |
|----------------------|--------|
| Top 10% Mean<br>IC50 | 8.0 nM |
|----------------------|--------|

|          | Predicted Active | Predicted Inactive |
|----------|------------------|--------------------|
| Active   | 44               | 5                  |
| Inactive | 43               | 196                |

# <10 nM DefGood in c-Abl

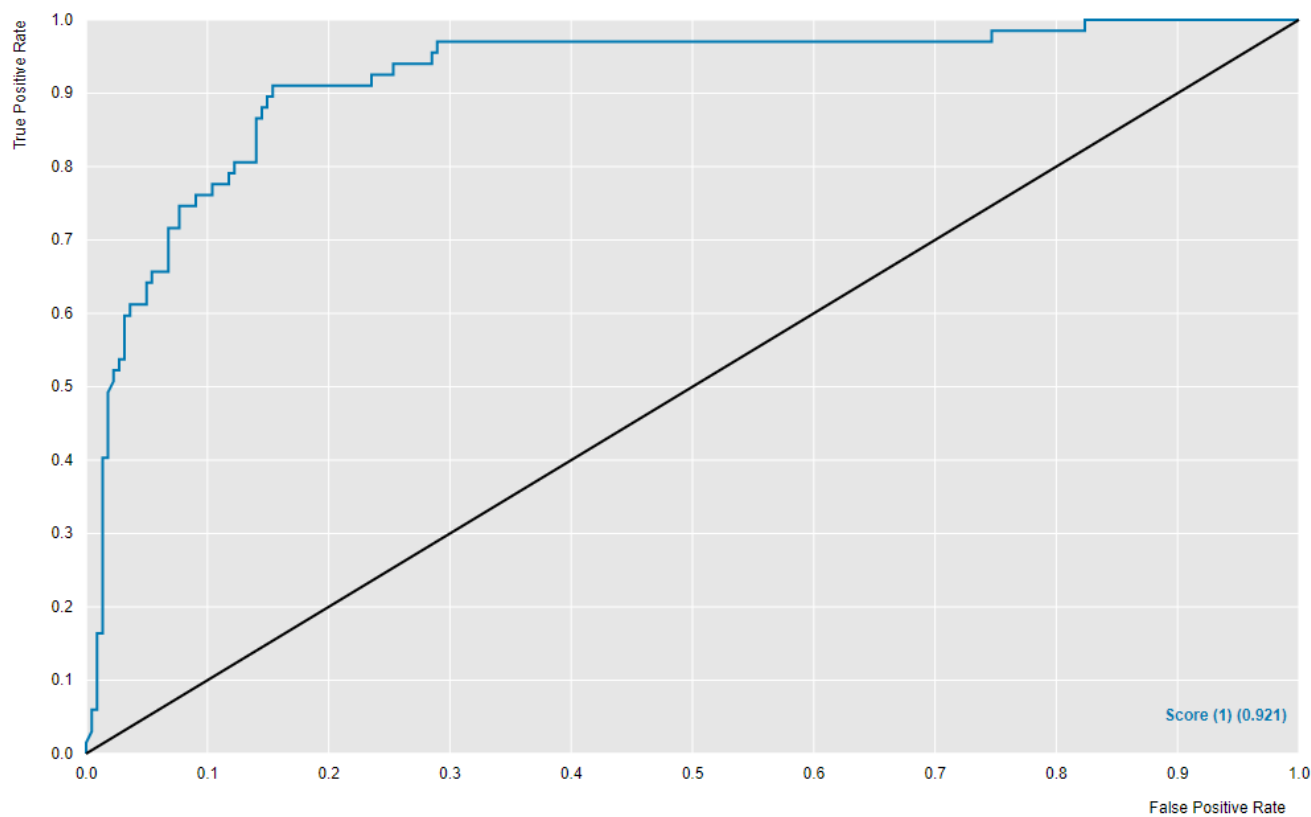

● Score (1) ● random

N=289

|                      |                                     |
|----------------------|-------------------------------------|
| Top 10% Mean<br>IC50 | 26.5 nM<br>(one 554 nM<br>Compound) |
|----------------------|-------------------------------------|

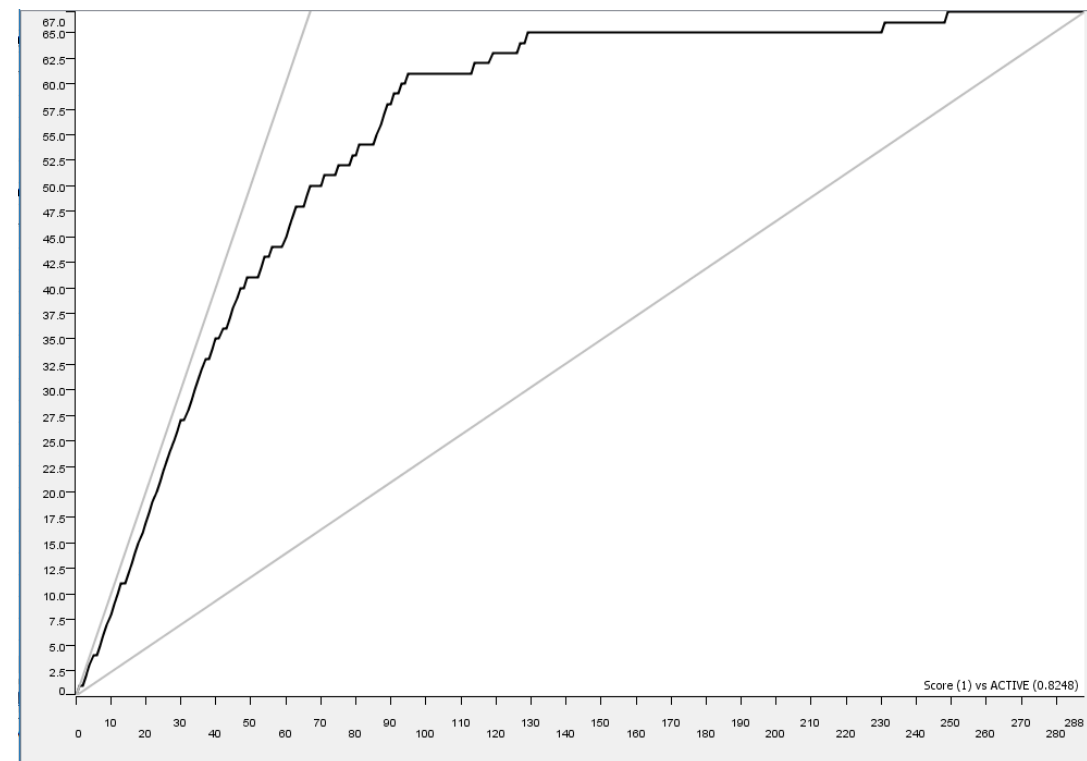

|          | Predicted Active | Predicted Inactive |
|----------|------------------|--------------------|
| Active   | 61               | 6                  |
| Inactive | 43               | 178                |

# <15 nM DefGood in c-Abl

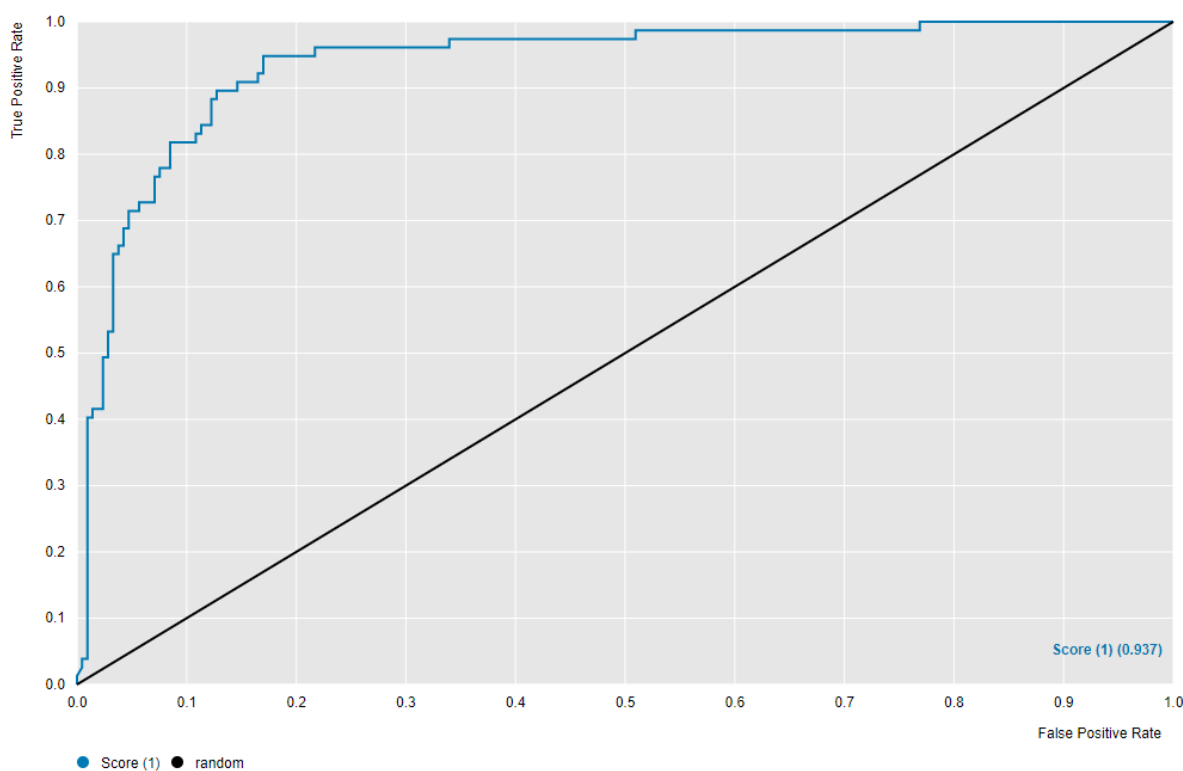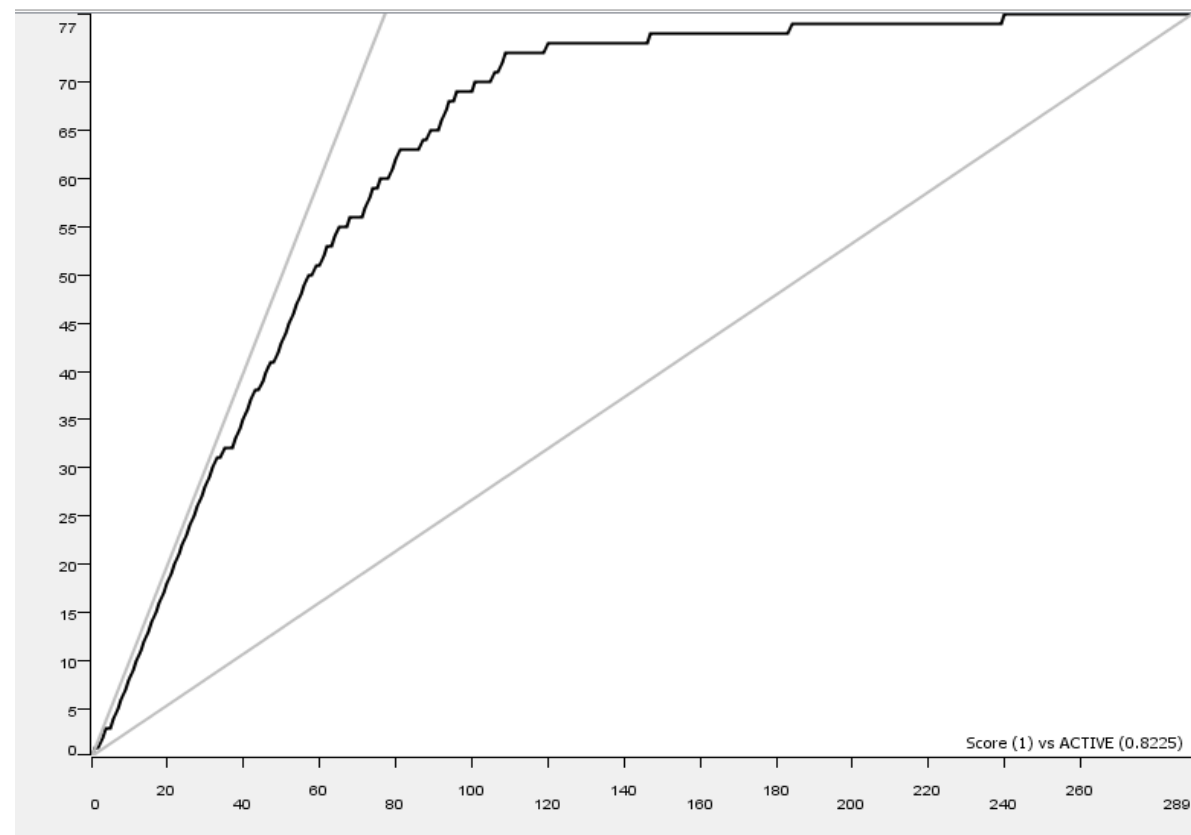

N=289

Top 10% Mean  
IC50

35.4 nM  
(one 800 nM  
compound)

|          | Predicted Active | Predicted Inactive |
|----------|------------------|--------------------|
| Active   | 71               | 6                  |
| Inactive | 35               | 177                |

# <20 nM DefGood in c-Abl

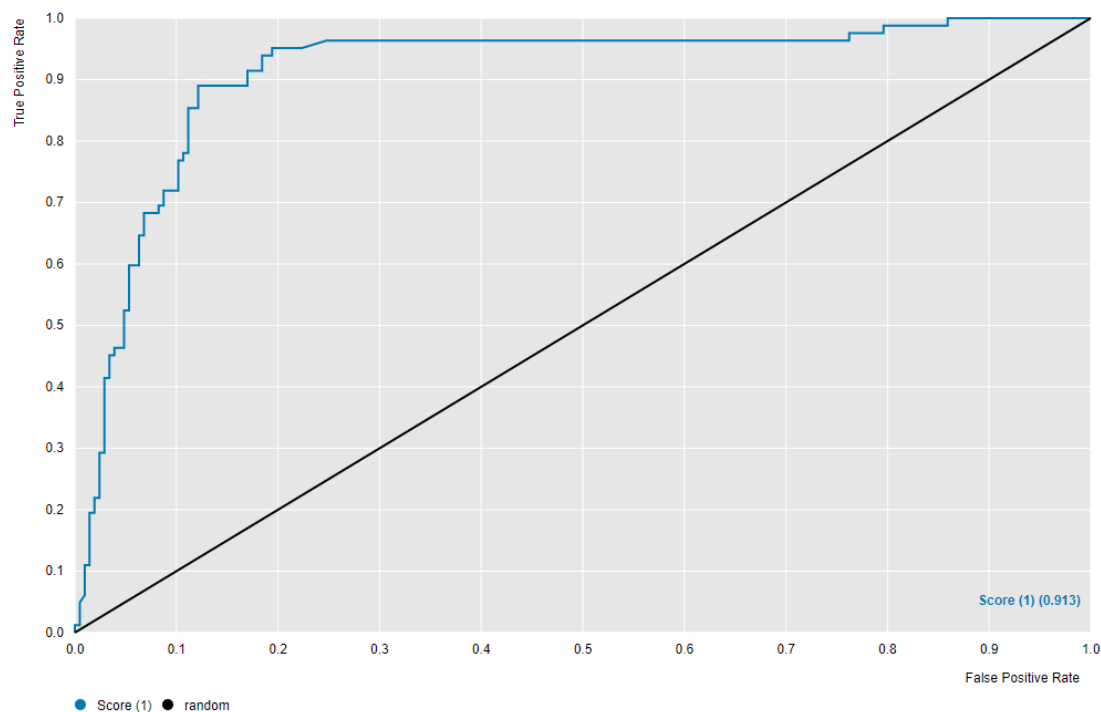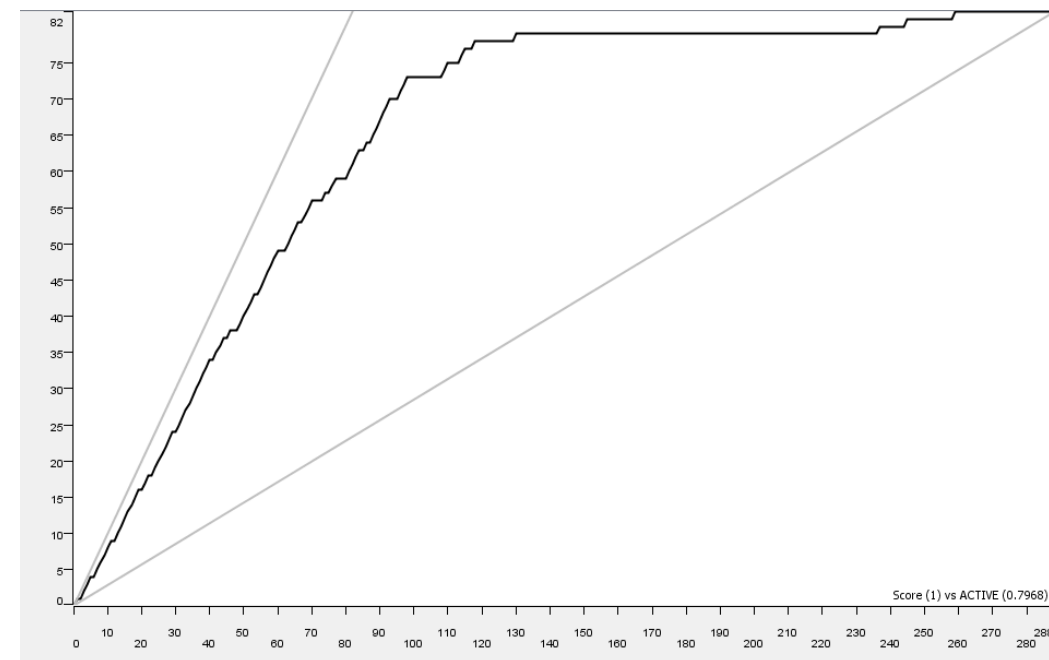

N=289

|                      |                                          |
|----------------------|------------------------------------------|
| Top 10% Mean<br>IC50 | 77.4 nM<br>(several >100<br>nM mistakes) |
|----------------------|------------------------------------------|

|          | Predicted Active | Predicted Inactive |
|----------|------------------|--------------------|
| Active   | 73               | 9                  |
| Inactive | 33               | 173                |

# <25 nM DefGood in c-Abl

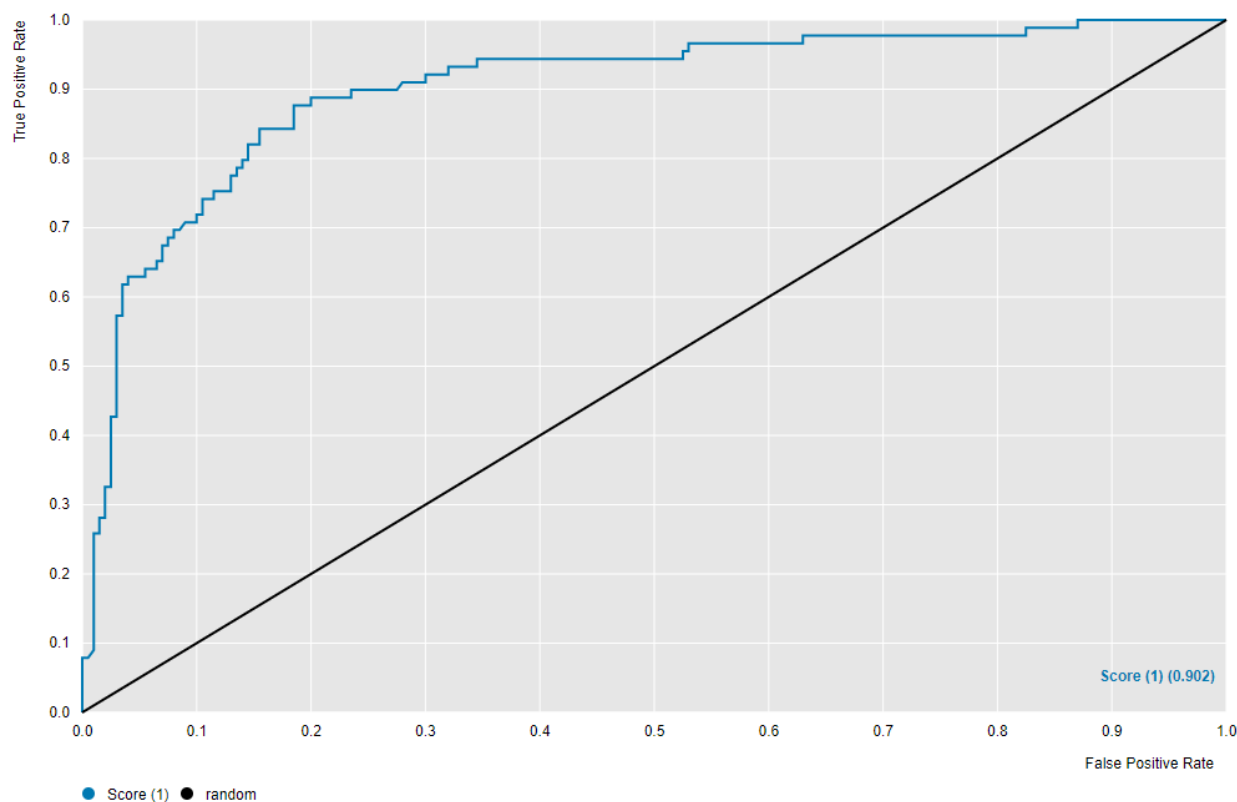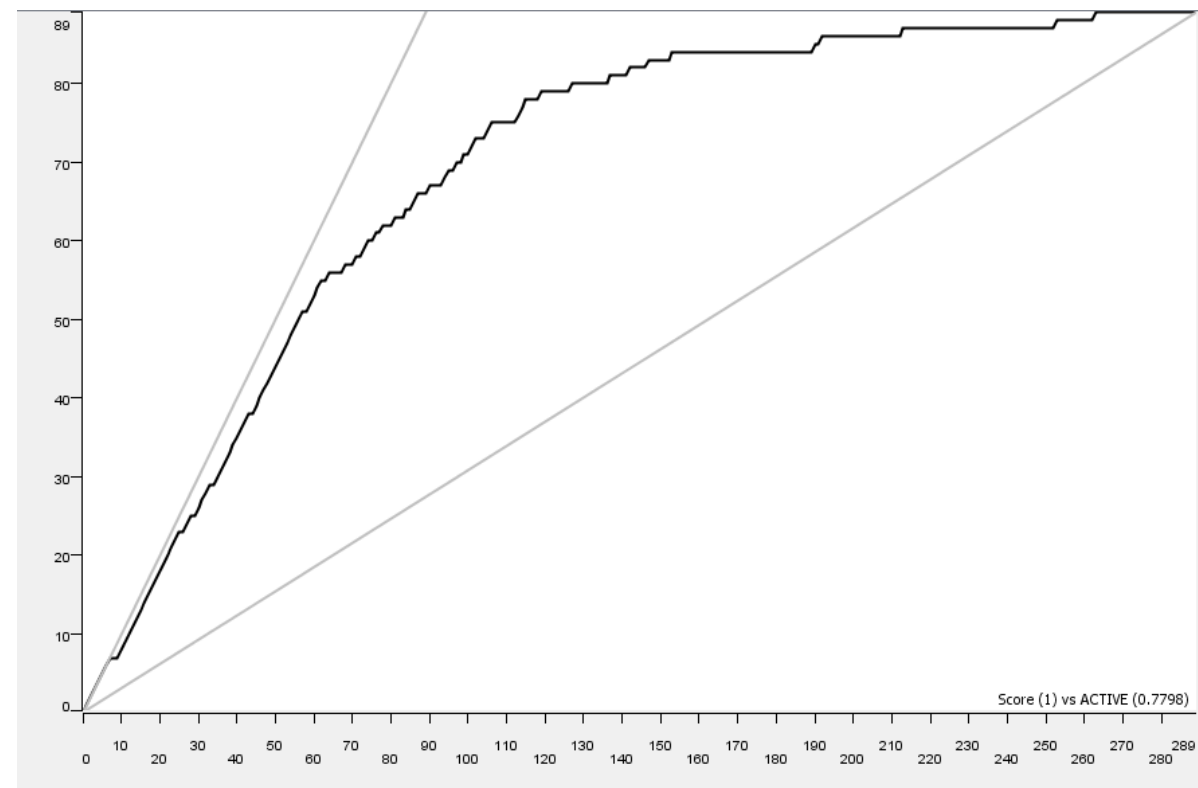

Top 10% Mean  
IC50

82.7 nM  
(several >100  
nM mistakes)

|          | Predicted Active | Predicted Inactive |
|----------|------------------|--------------------|
| Active   | 70               | 19                 |
| Inactive | 27               | 173                |

# Decision on DefGood

- <15 nM has the best specificity and enrichment. Not the best mean IC50, but that is because of one significant mistake (800 nM).

# SVM

- Doesn't work (Support vectors could not be generated)

# RF - <15 nM DefGood in c-Abl

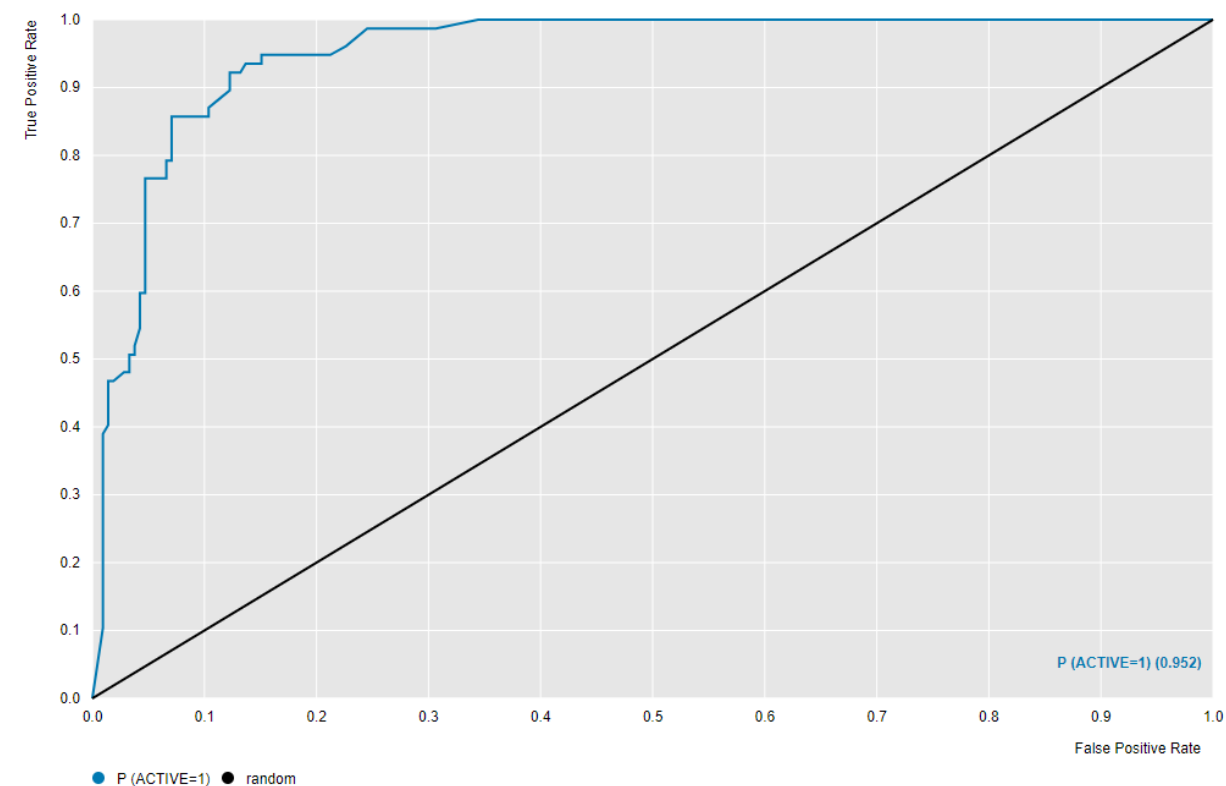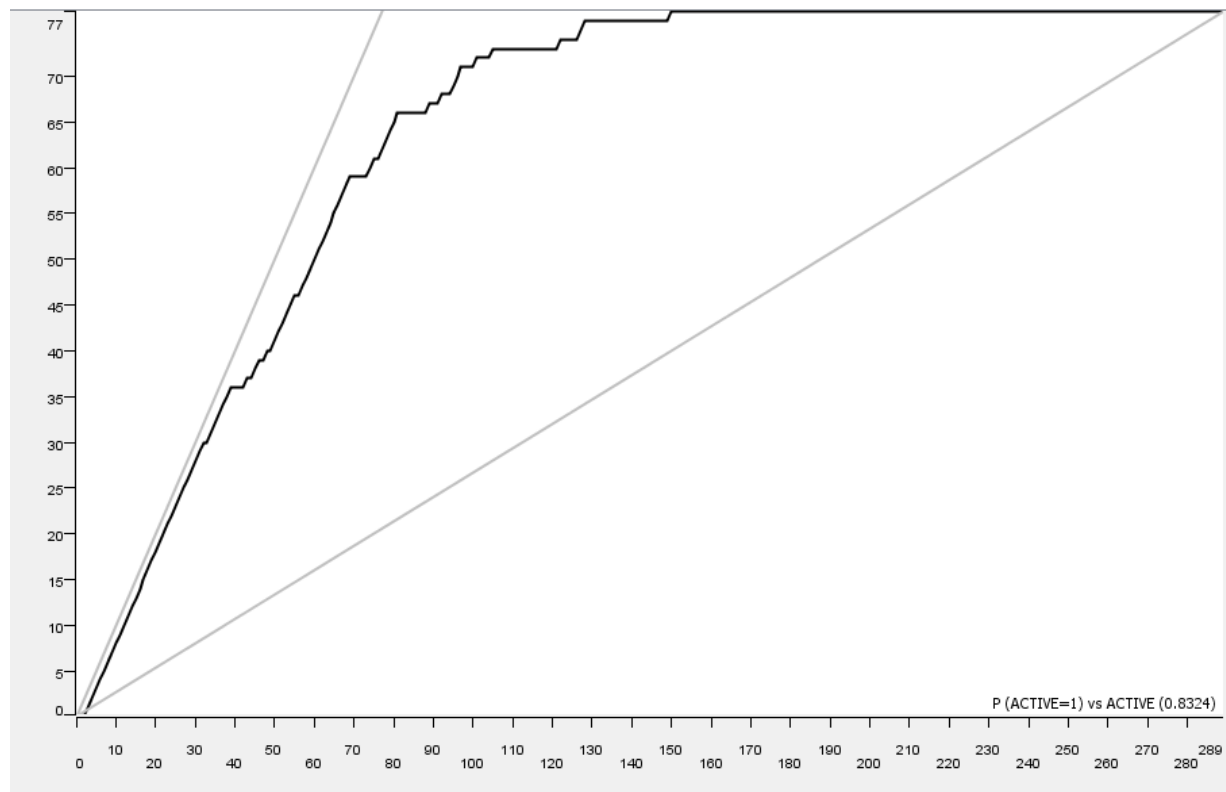

N=289

Top 10% Mean  
IC50

35.0 nM  
(one 800 nM  
compound)

|          | Predicted Active | Predicted Inactive |
|----------|------------------|--------------------|
| Active   | 66               | 11                 |
| Inactive | 15               | 197                |



# PNN - <15 nM DefGood in c-Abl

- Properties List (46 calculatable properties were used)
- Parameterization (Global Accuracy for Activity at a 15 nM decision value was used, and a 5-fold stratified sampling cross validation was used to parameterize theta minus and theta plus) Theta Minus = 0.05 and Theta Plus = 0.65

# PNN - <15 nM DefGood in c-Abl

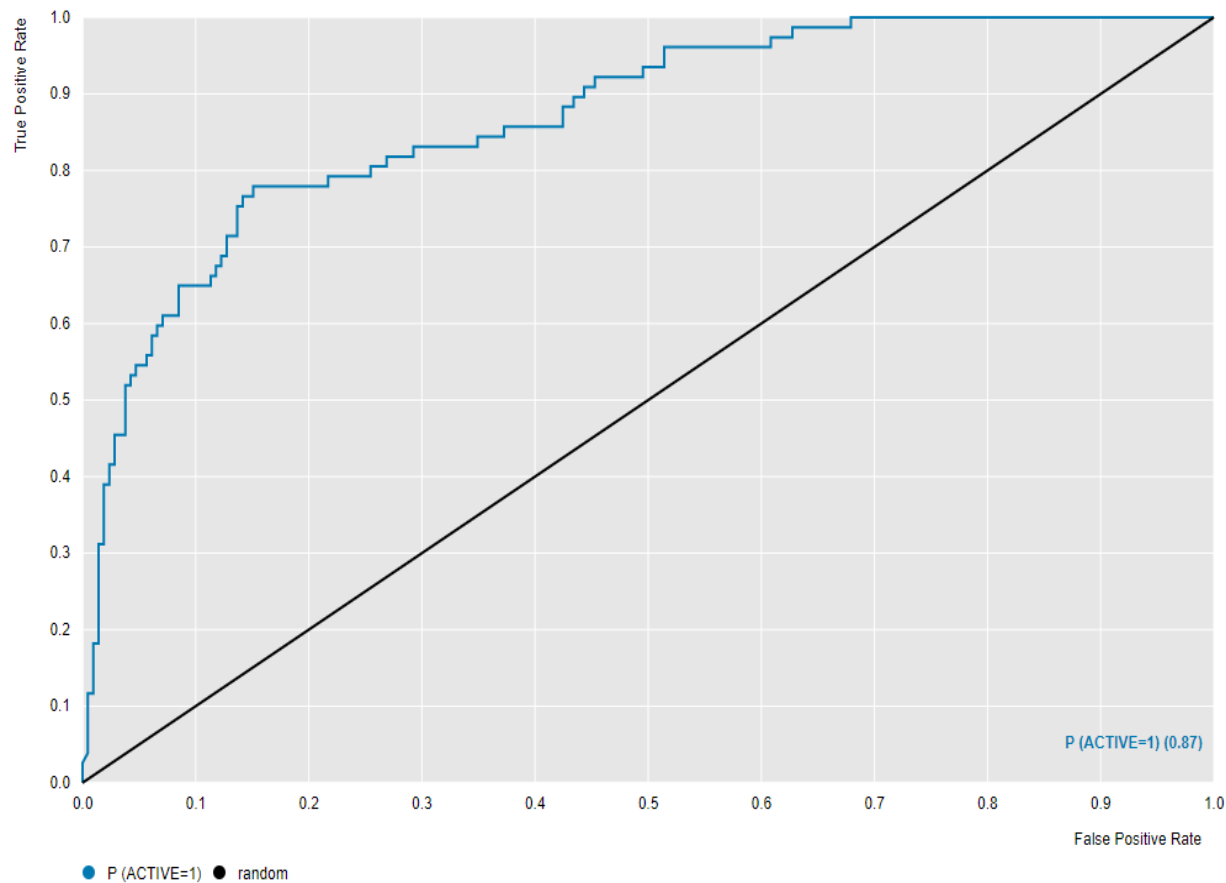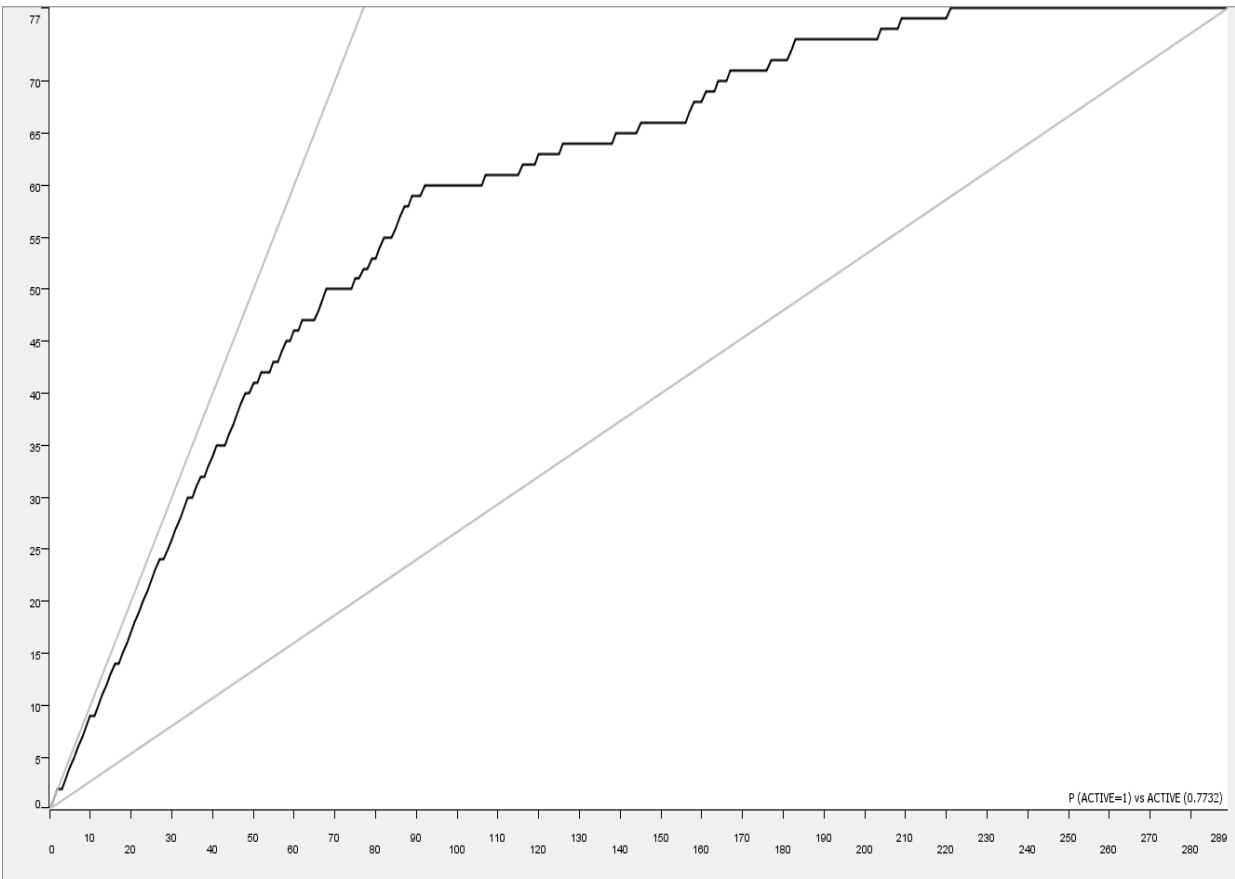

N=289

|                   |                                  |
|-------------------|----------------------------------|
| Top 10% Mean IC50 | 41.8 nM<br>(one 800 nM compound) |
|-------------------|----------------------------------|

|          | Predicted Active | Predicted Inactive |
|----------|------------------|--------------------|
| Active   | 27               | 50                 |
| Inactive | 4                | 208                |

# NBN Error Tolerance- <15 nM DefGood in c-Abl

- 0-50% absolute error

# <15 nM DefGood in c-Abl, 5% error; Random seed = 1515533876005

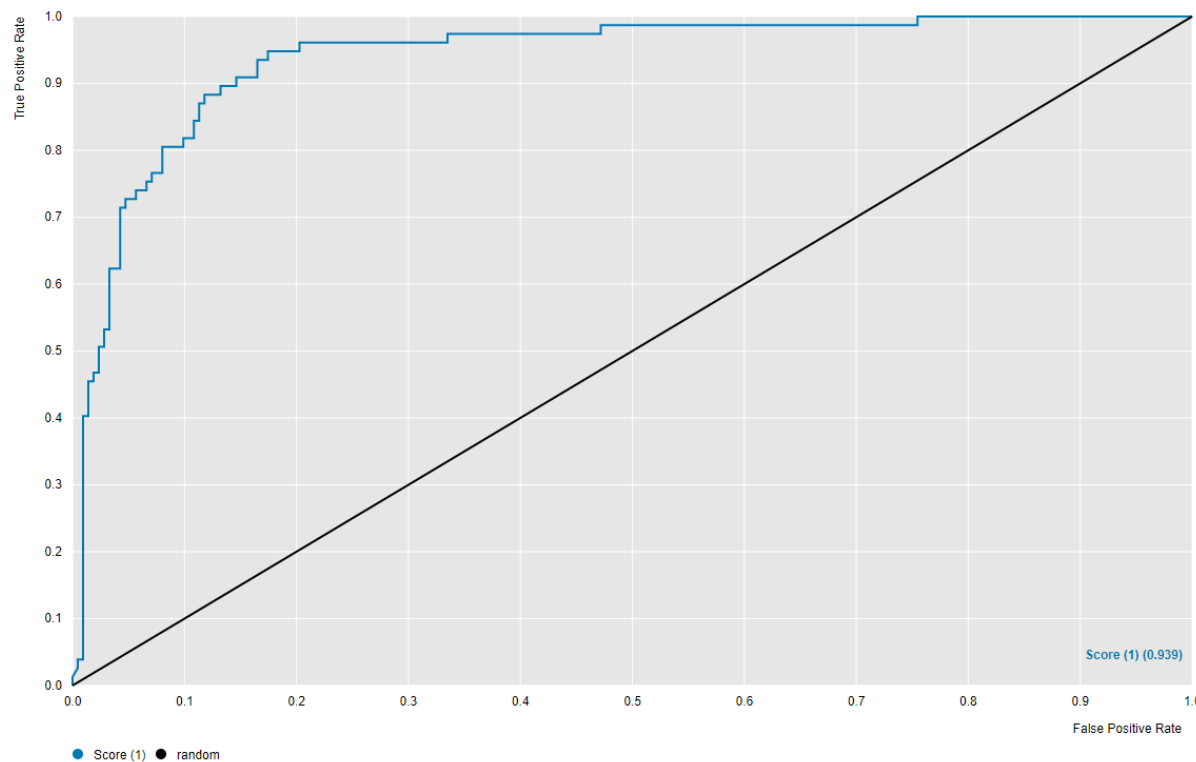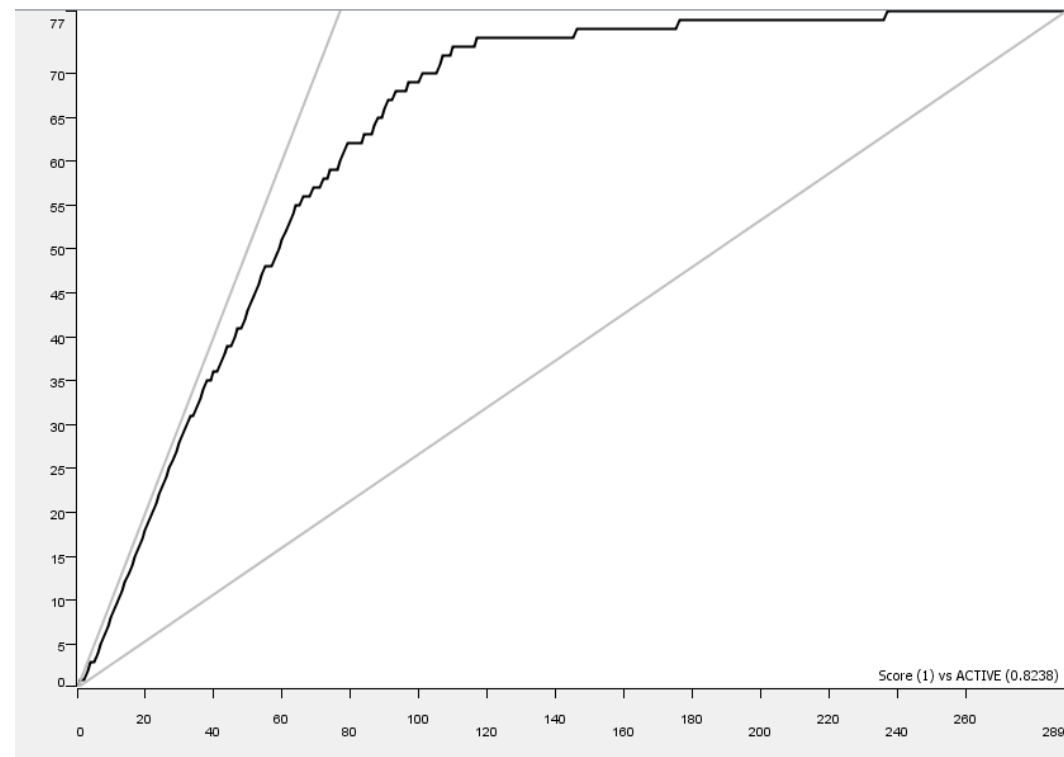

N=289

|                   |                                  |
|-------------------|----------------------------------|
| Top 10% Mean IC50 | 35.7 nM<br>(one 800 nM compound) |
|-------------------|----------------------------------|

|          | Predicted Active | Predicted Inactive |
|----------|------------------|--------------------|
| Active   | 70               | 7                  |
| Inactive | 31               | 181                |

# <15 nM DefGood in c-Abl, 10% error

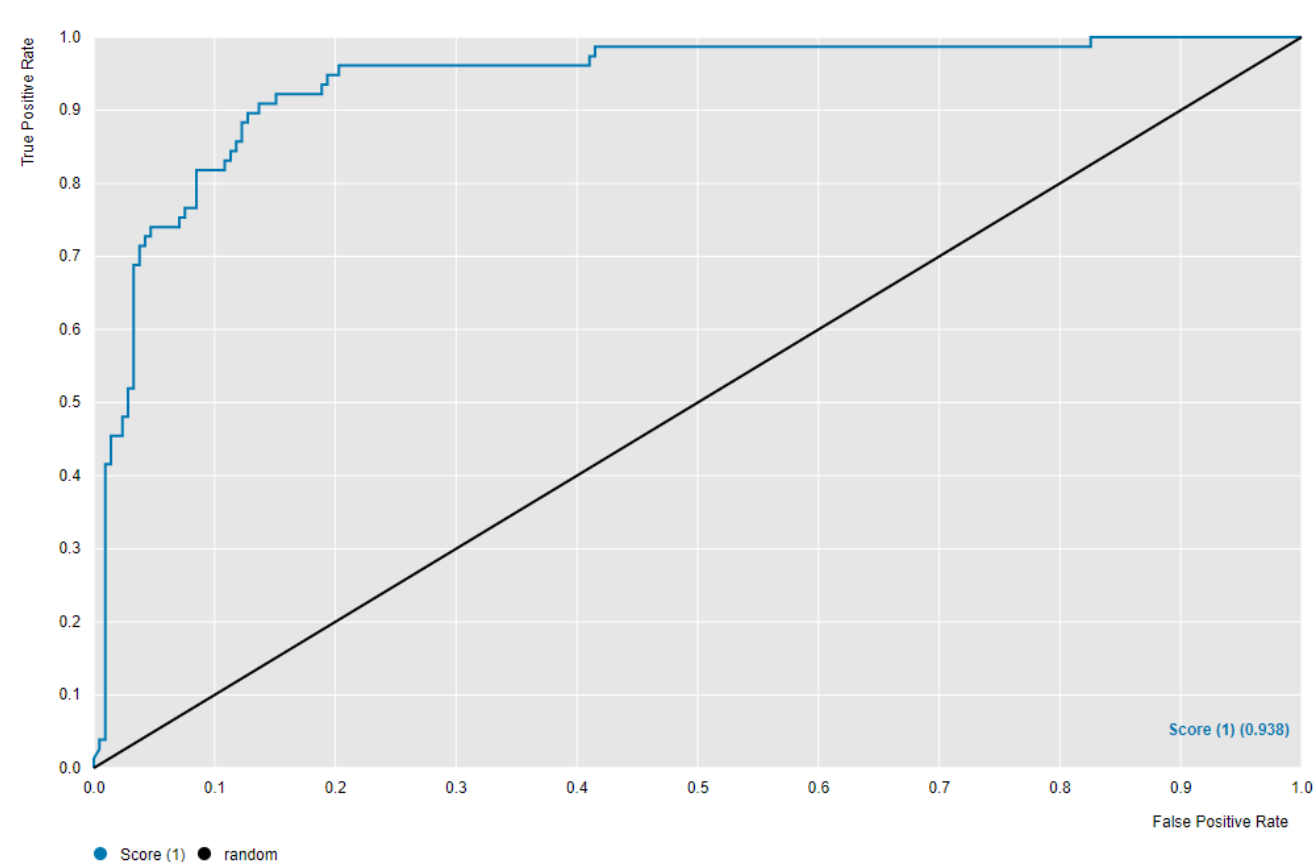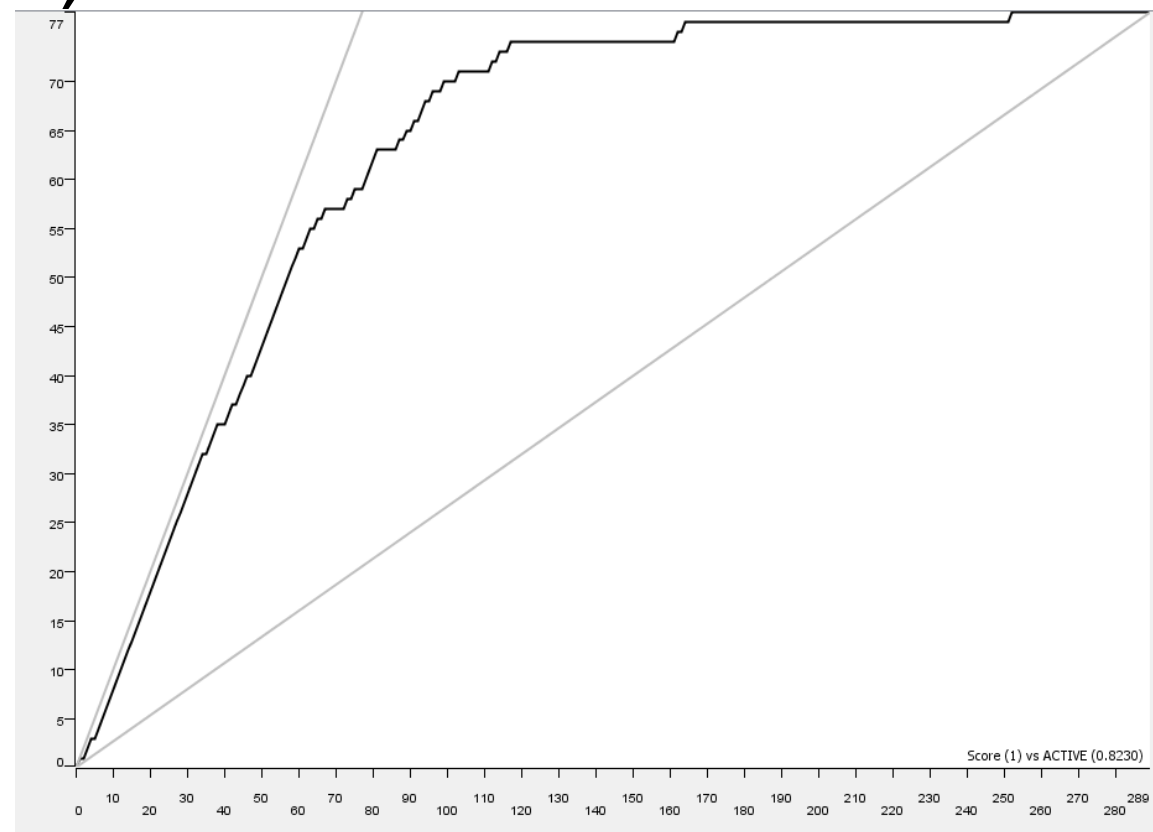

N=289

|                   |                                  |
|-------------------|----------------------------------|
| Top 10% Mean IC50 | 35.5 nM<br>(one 800 nM compound) |
|-------------------|----------------------------------|

|          | Predicted Active | Predicted Inactive |
|----------|------------------|--------------------|
| Active   | 70               | 7                  |
| Inactive | 31               | 181                |

# <15 nM DefGood in c-Abl, 15% error

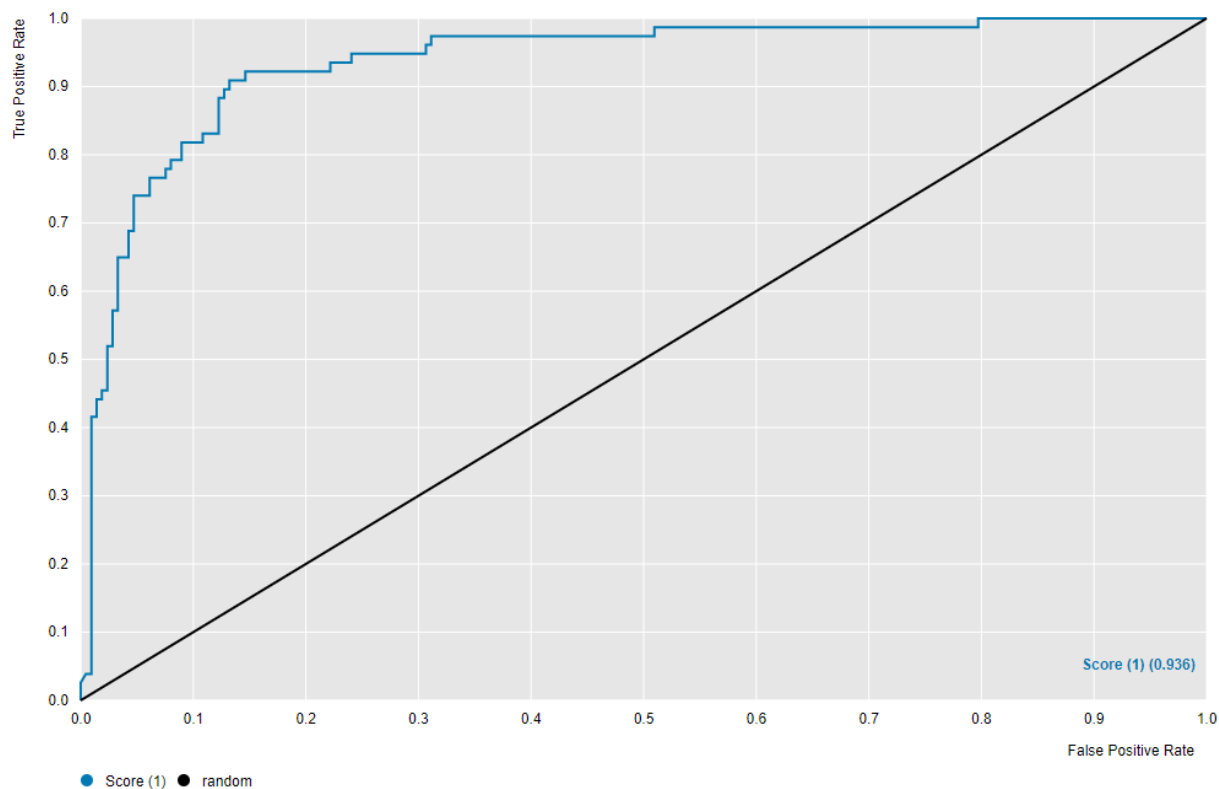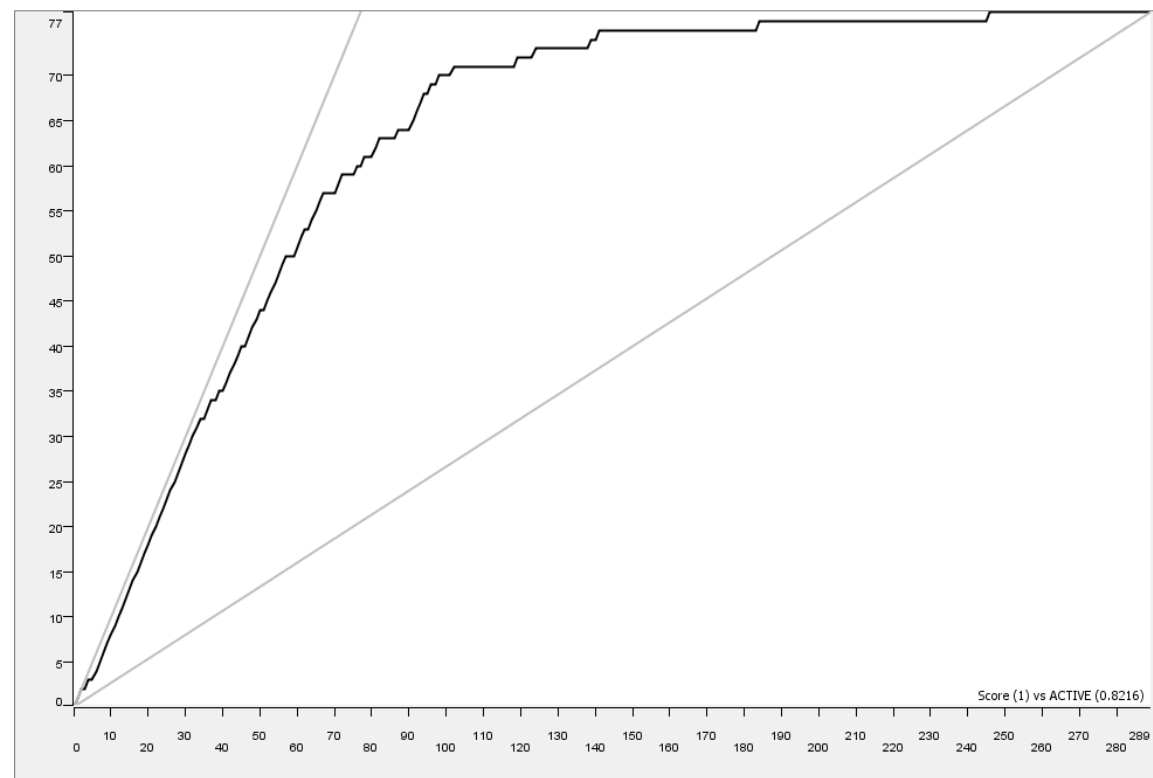

N=289

|                      |                                     |
|----------------------|-------------------------------------|
| Top 10% Mean<br>IC50 | 35.4 nM<br>(one 800 nM<br>compound) |
|----------------------|-------------------------------------|

|          | Predicted Active | Predicted Inactive |
|----------|------------------|--------------------|
| Active   | 71               | 6                  |
| Inactive | 33               | 179                |

# <15 nM DefGood in c-Abl, 20% error

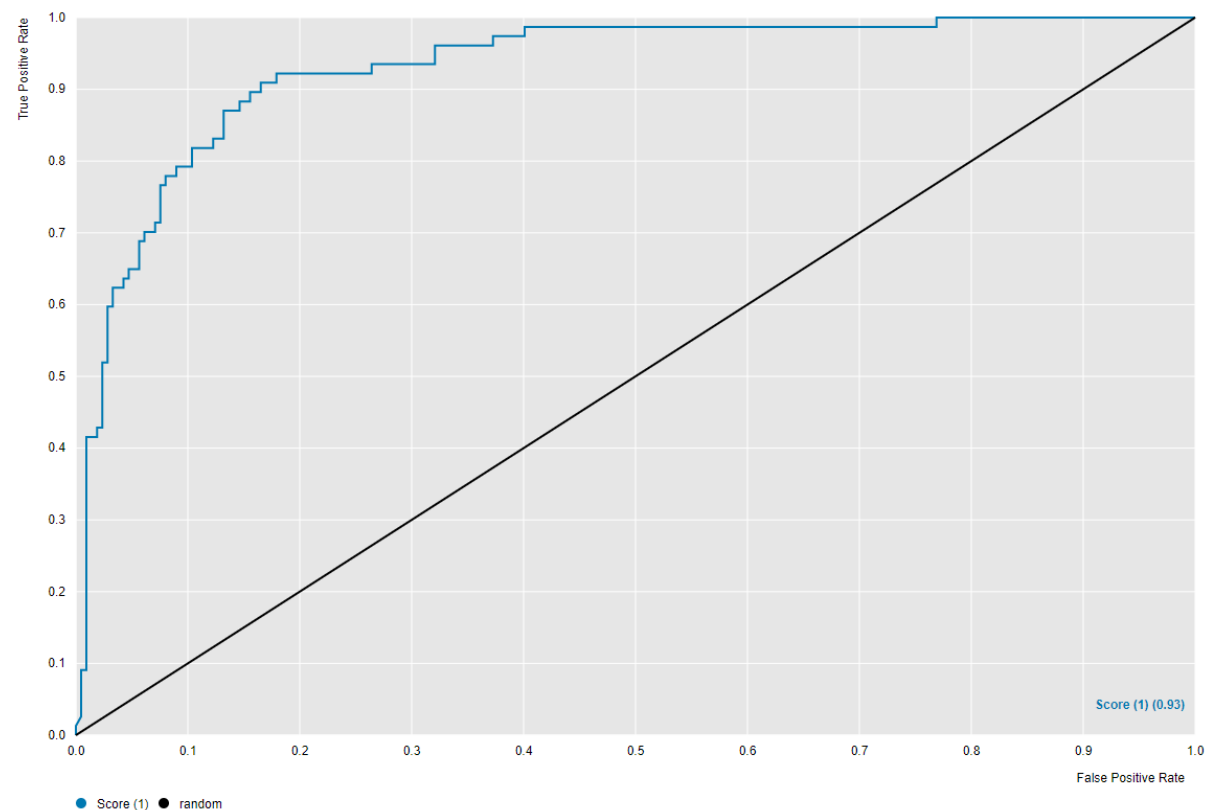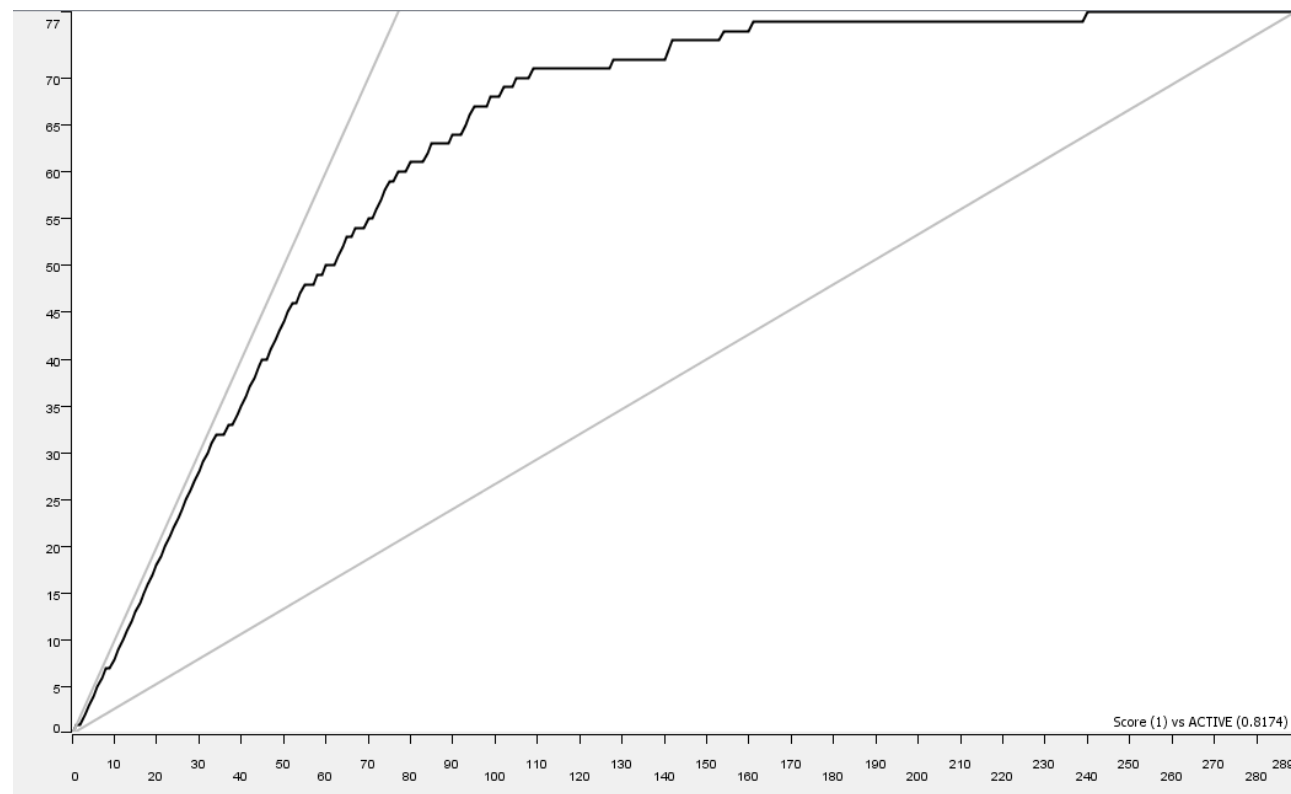

N=289

Top 10% Mean  
IC50

35.4 nM  
(one 800 nM  
compound)

|          | Predicted Active | Predicted Inactive |
|----------|------------------|--------------------|
| Active   | 74               | 3                  |
| Inactive | 73               | 139                |

# <15 nM DefGood in c-Abl, 30% error

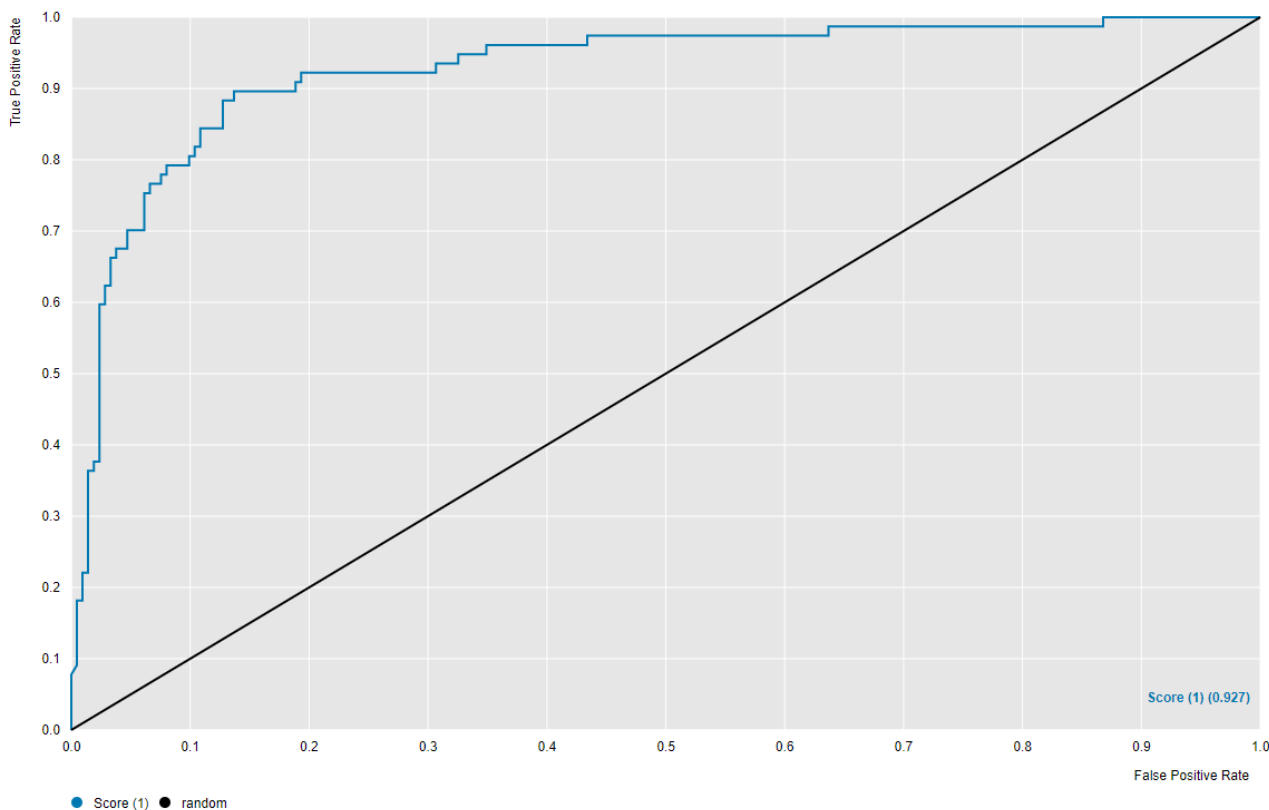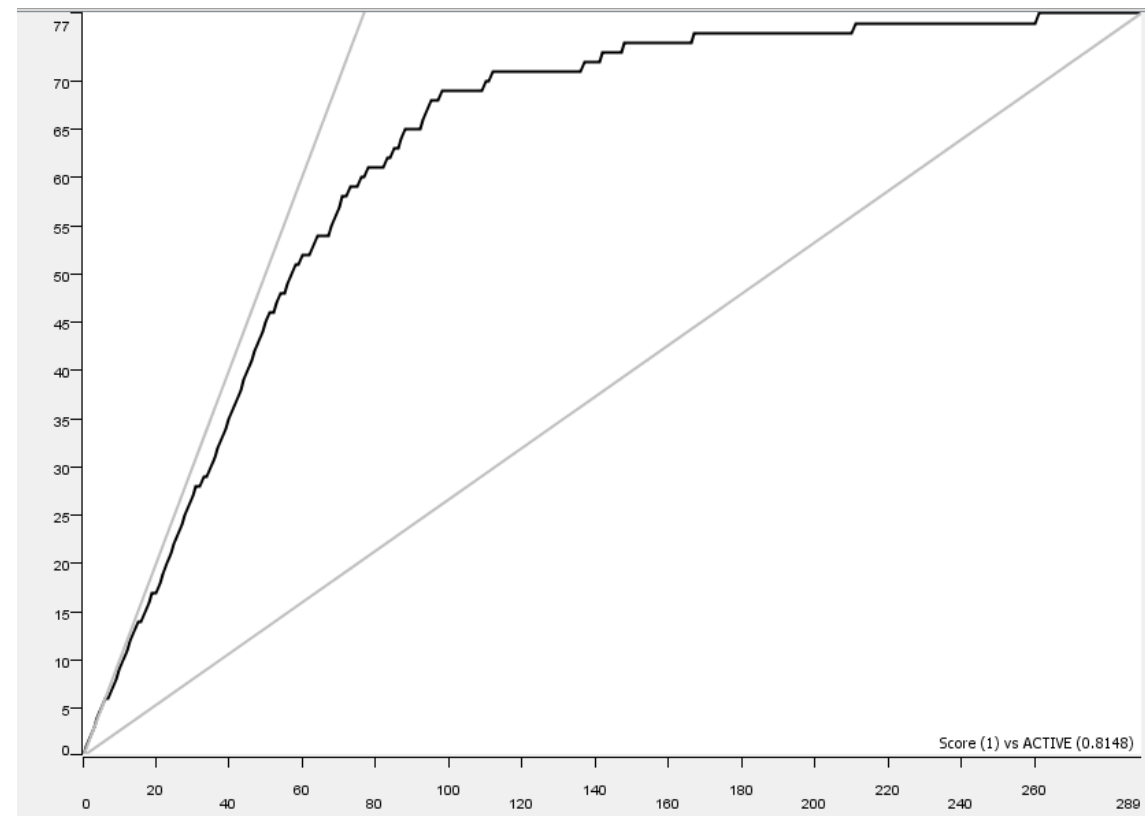

N=289

|                      |                                     |
|----------------------|-------------------------------------|
| Top 10% Mean<br>IC50 | 36.0 nM<br>(one 800 nM<br>compound) |
|----------------------|-------------------------------------|

|          | Predicted Active | Predicted Inactive |
|----------|------------------|--------------------|
| Active   | 67               | 10                 |
| Inactive | 27               | 185                |



# <15 nM DefGood in c-Abl, 40% error

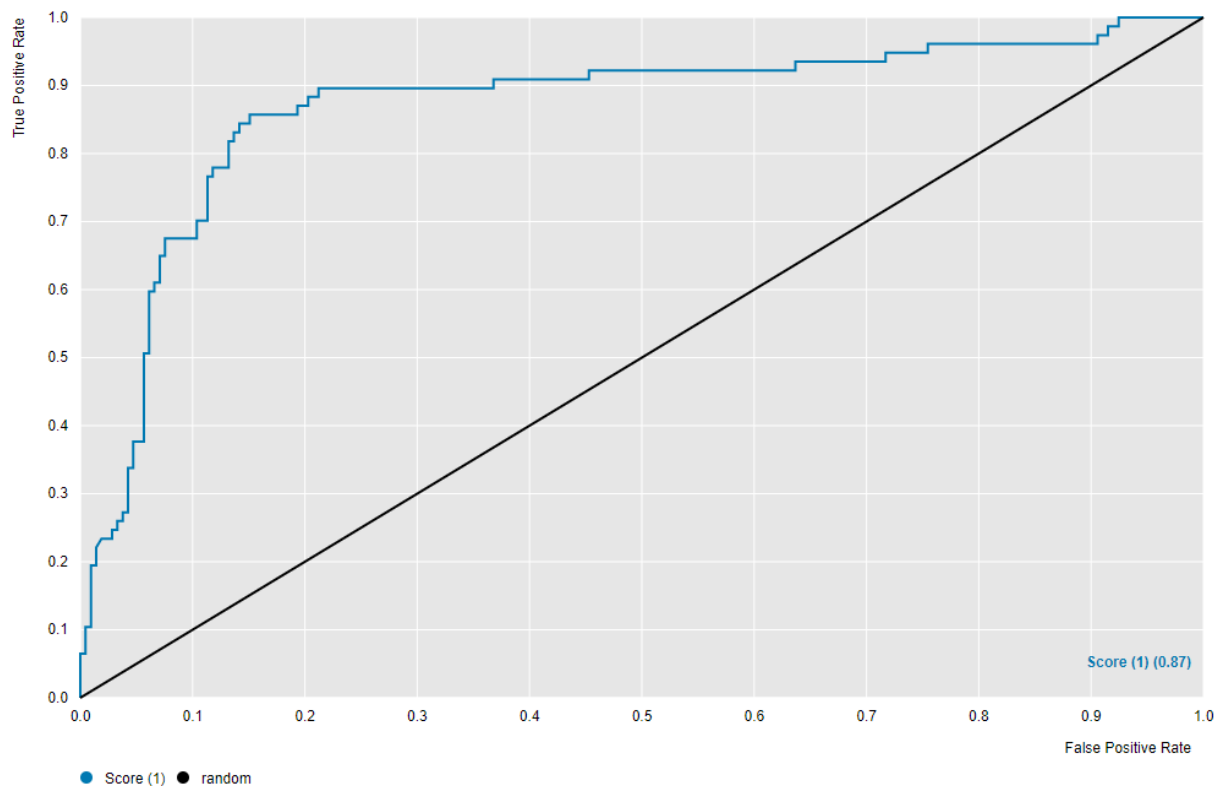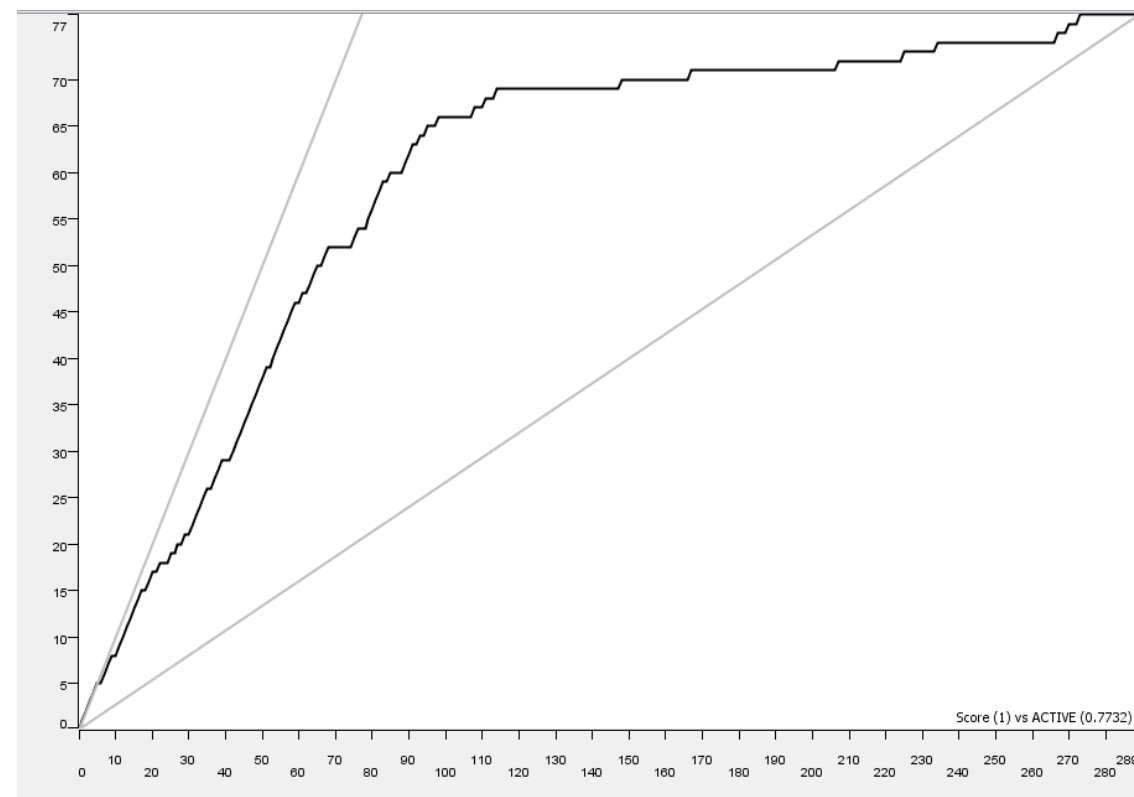

N=289

|                      |                                     |
|----------------------|-------------------------------------|
| Top 10% Mean<br>IC50 | 41.6 nM<br>(one 800 nM<br>compound) |
|----------------------|-------------------------------------|

|          | Predicted Active | Predicted Inactive |
|----------|------------------|--------------------|
| Active   | 64               | 13                 |
| Inactive | 29               | 183                |

# <15 nM DefGood in c-Abl, 45% error

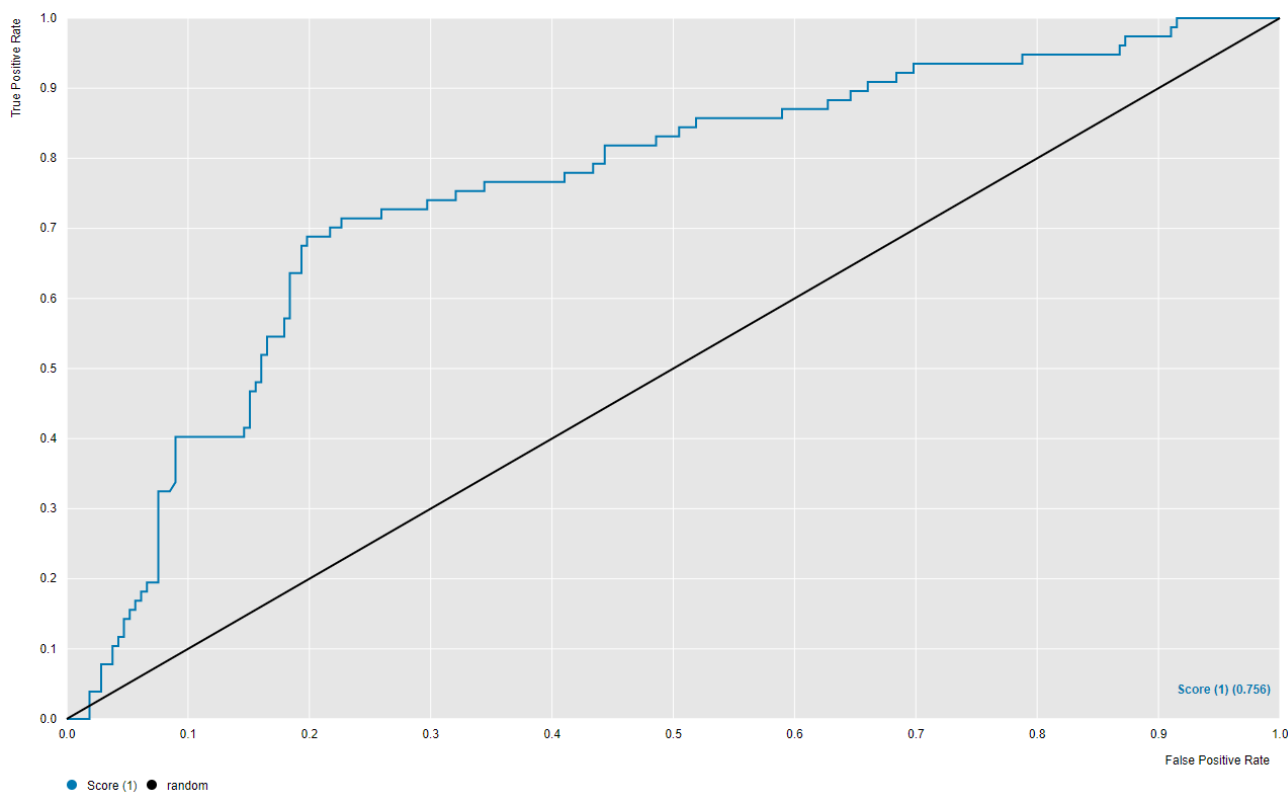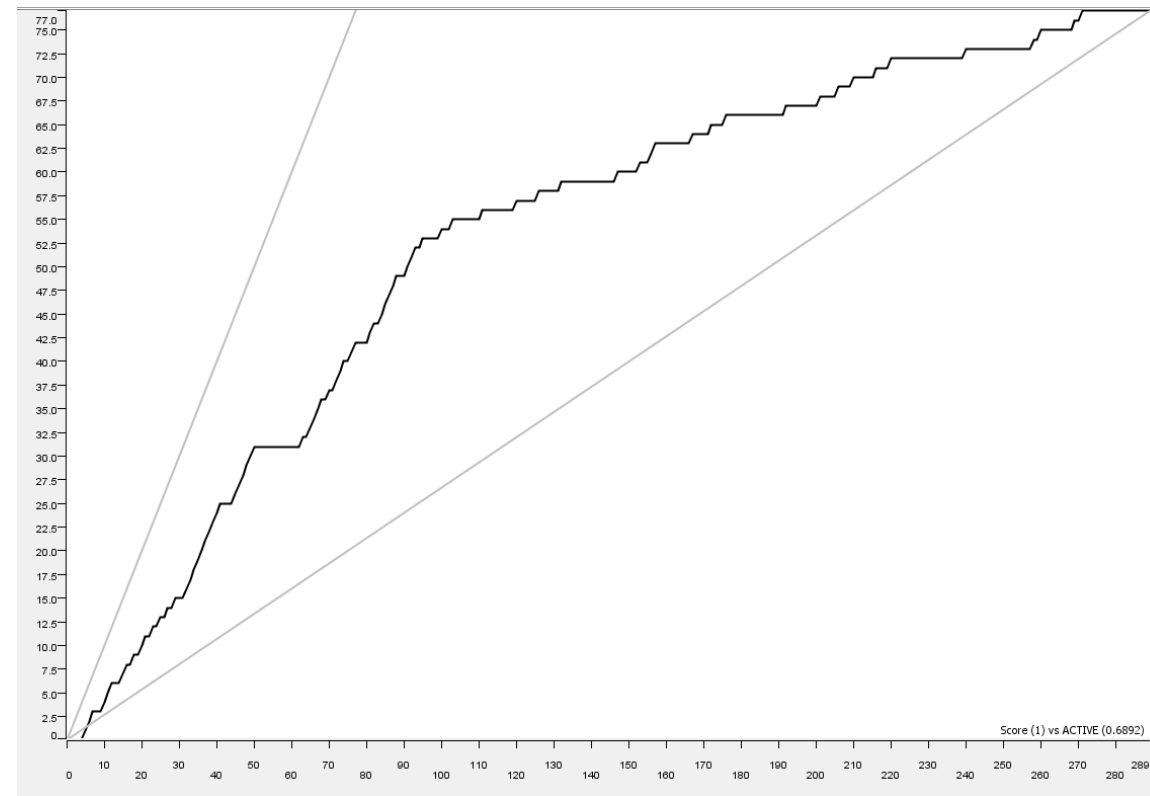

N=289

Top 10% Mean  
IC50

2,000 nM

|          | Predicted Active | Predicted Inactive |
|----------|------------------|--------------------|
| Active   | 53               | 24                 |
| Inactive | 46               | 166                |

# <15 nM DefGood in c-Abl, 50% error

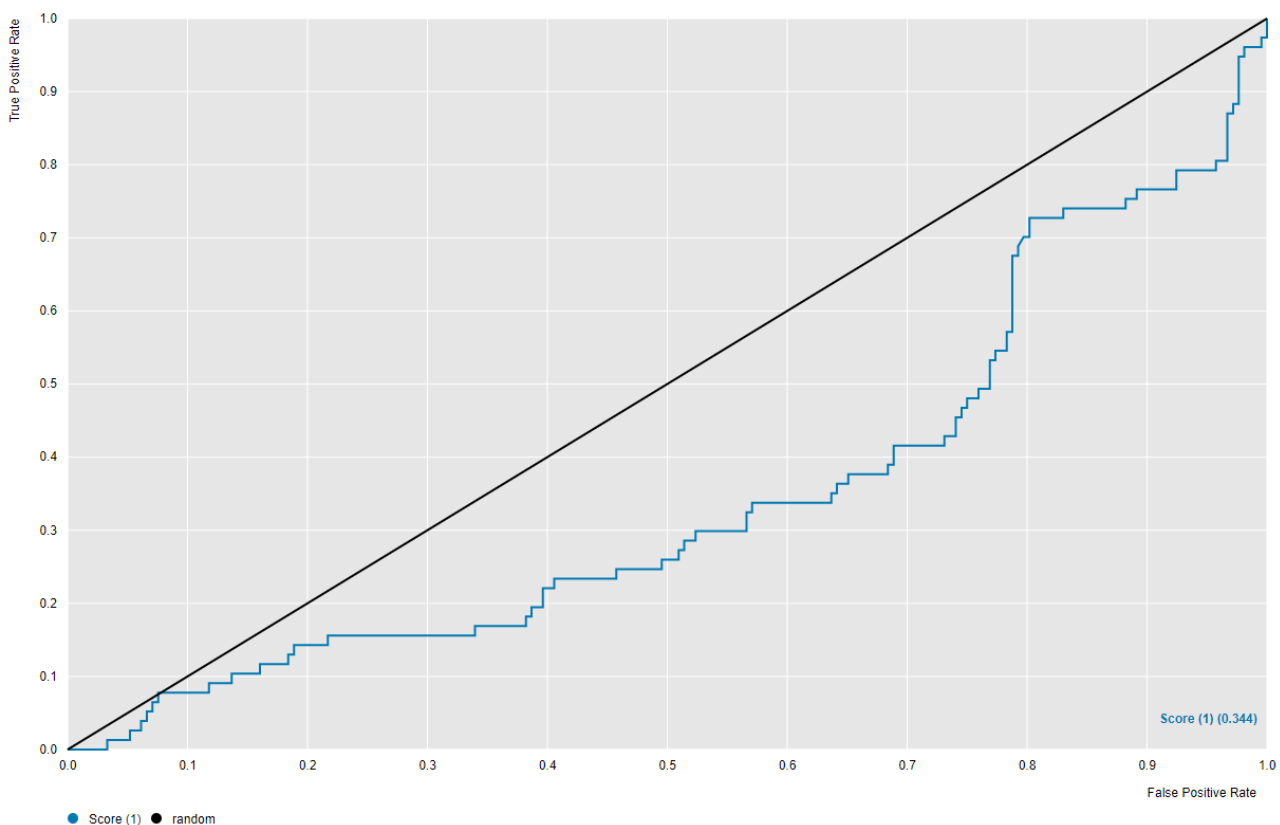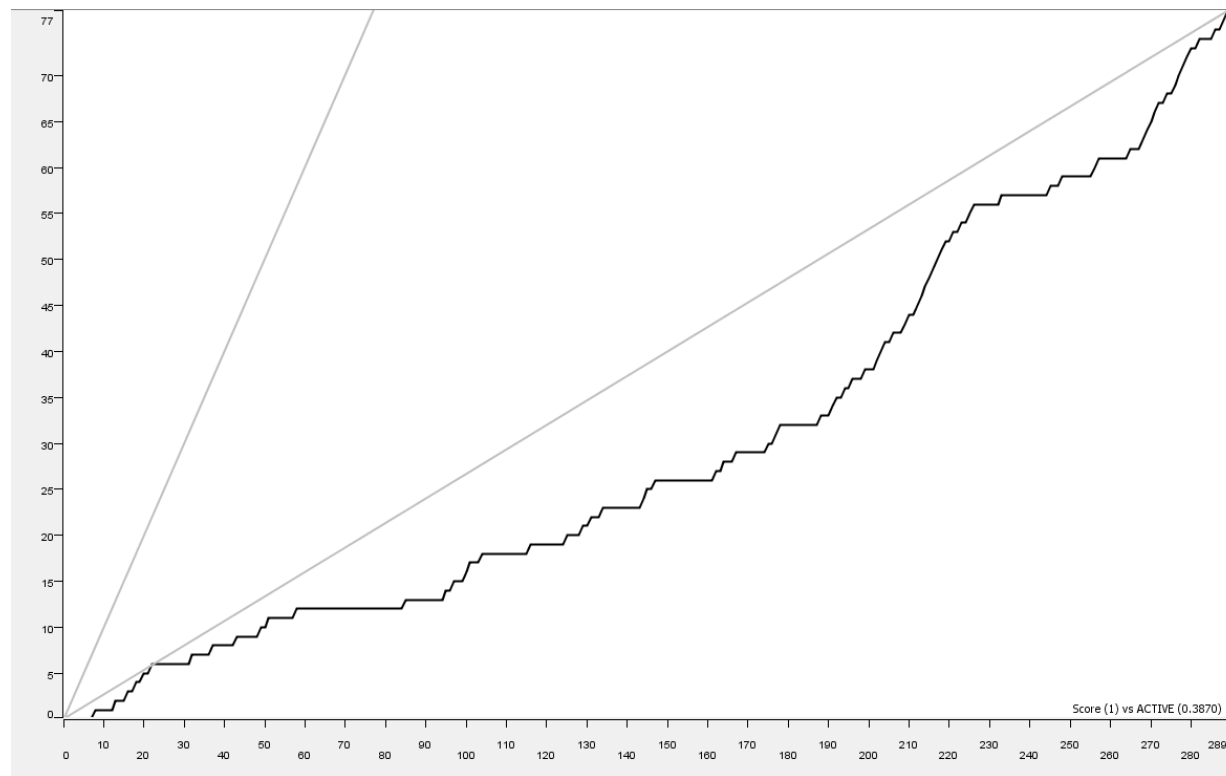

N=289

| Top 10% Mean IC50 | 6,100 nM |
|-------------------|----------|
|-------------------|----------|

|          | Predicted Active | Predicted Inactive |
|----------|------------------|--------------------|
| Active   | 0                | 77                 |
| Inactive | 6                | 206                |

# <15 nM DefGood in c-Abl, 10% error; Random seed = 429

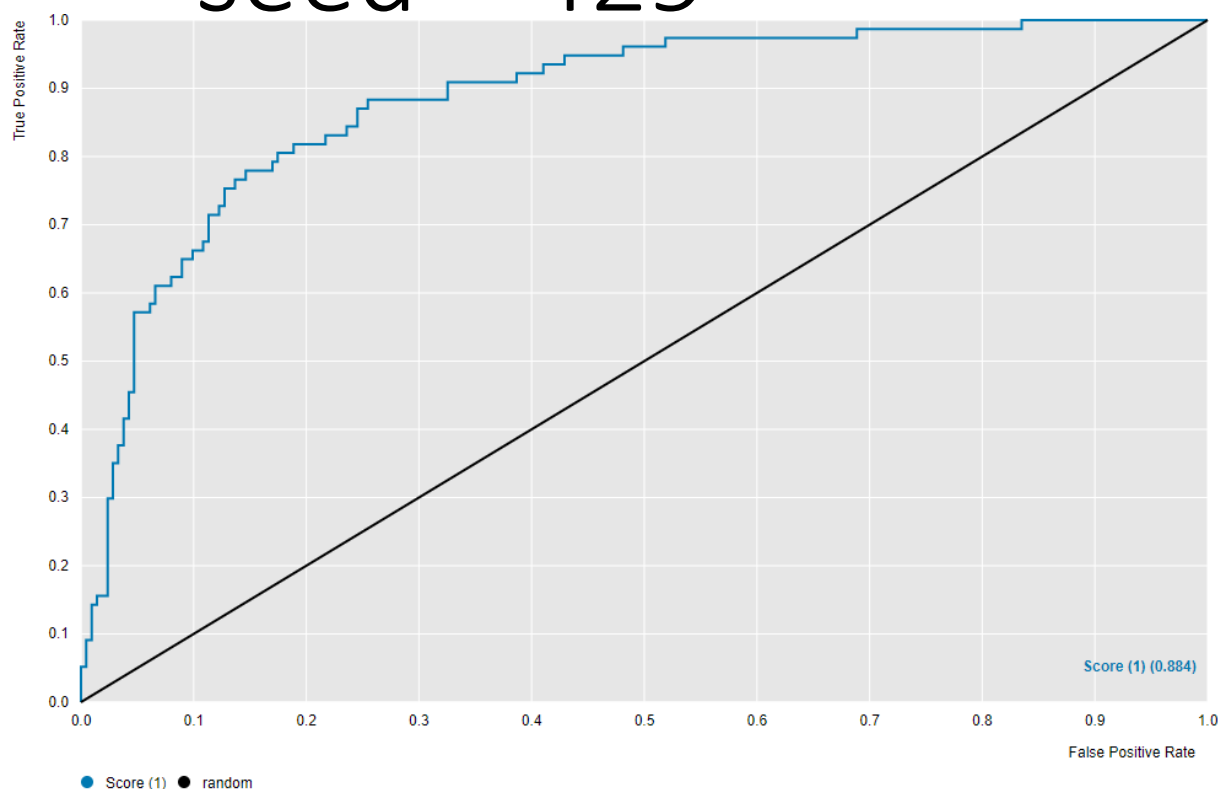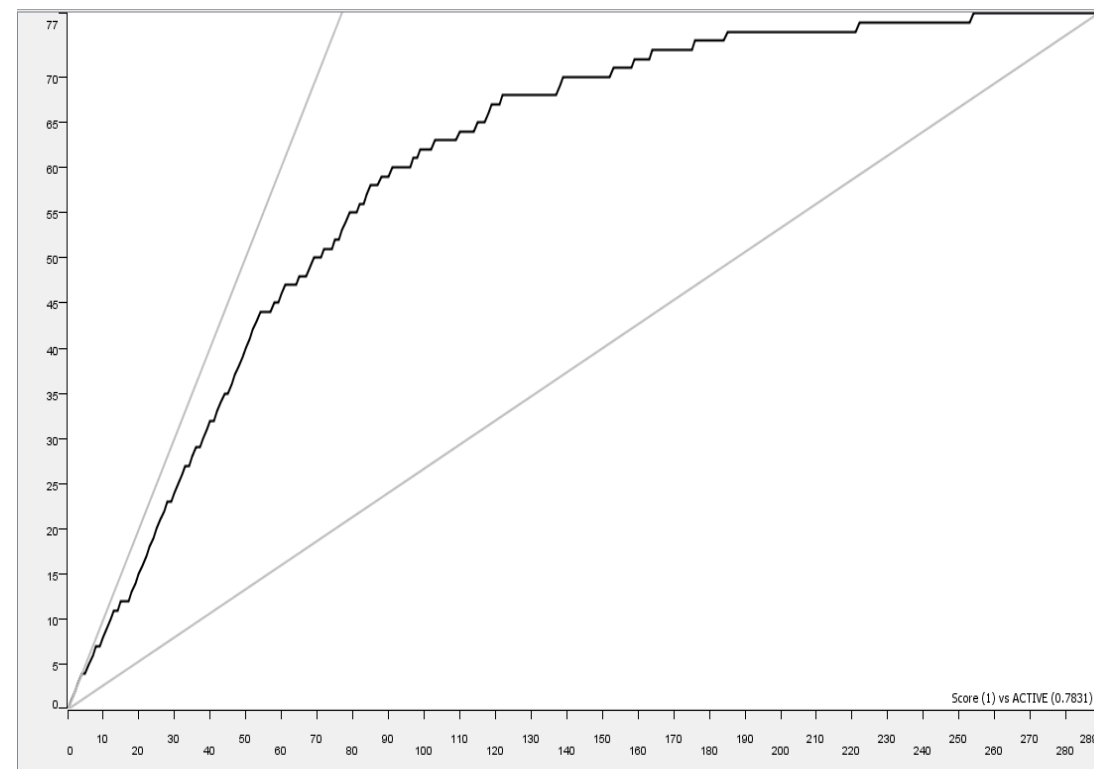

N=289

|                      |                                     |
|----------------------|-------------------------------------|
| Top 10% Mean<br>IC50 | 39.5 nM<br>(one 800 nM<br>compound) |
|----------------------|-------------------------------------|

|          | Predicted Active | Predicted Inactive |
|----------|------------------|--------------------|
| Active   | 60               | 17                 |
| Inactive | 32               | 180                |

# <15 nM DefGood in c-Abl, 20% error; Random seed = 429

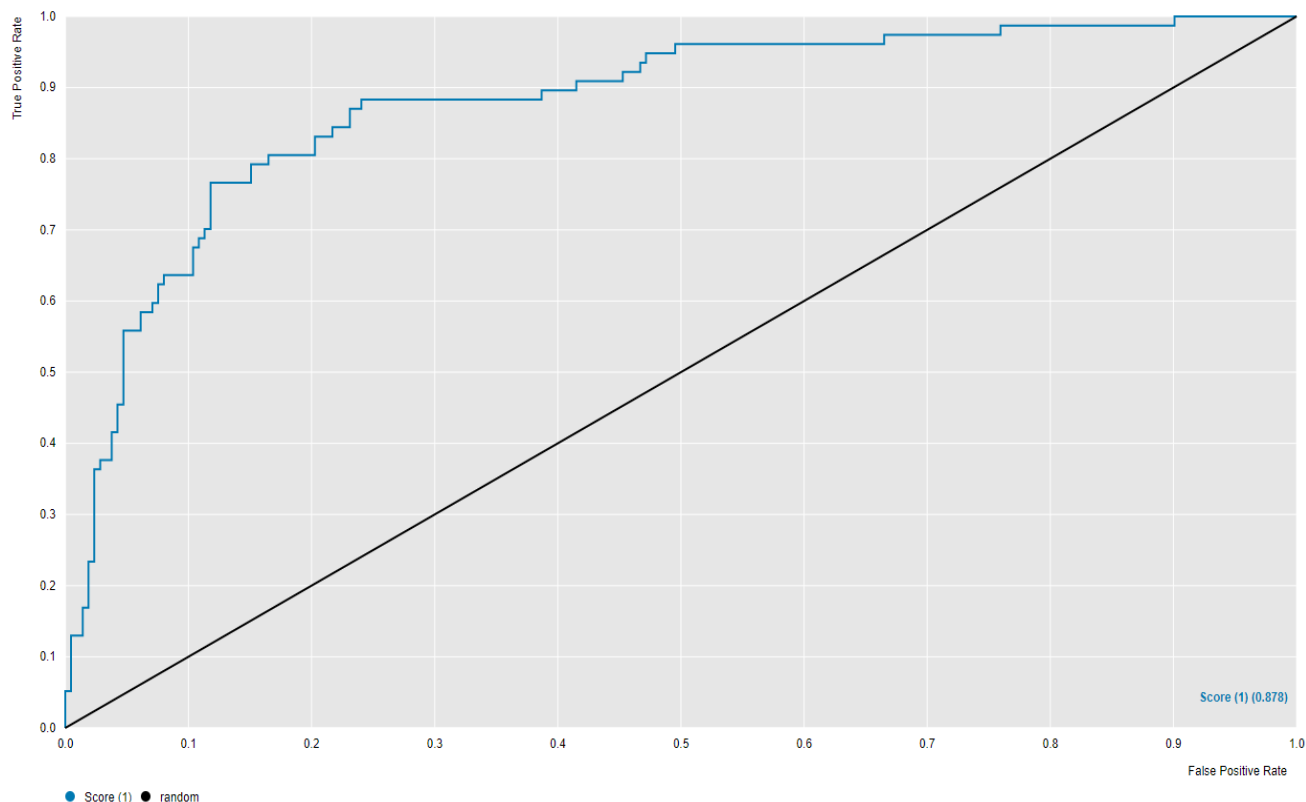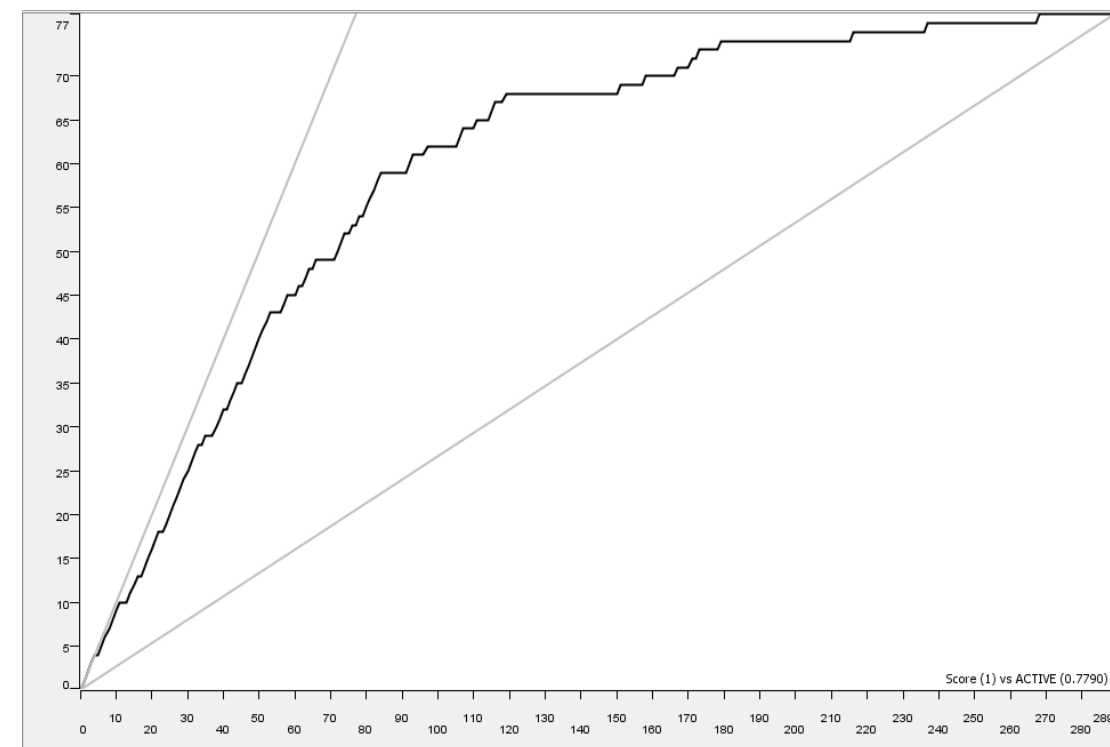

N=289

|                   |                                  |
|-------------------|----------------------------------|
| Top 10% Mean IC50 | 39.2 nM<br>(one 800 nM compound) |
|-------------------|----------------------------------|

|          | Predicted Active | Predicted Inactive |
|----------|------------------|--------------------|
| Active   | 52               | 25                 |
| Inactive | 23               | 189                |

# <15 nM DefGood in c-Abl, 40% error; Random seed = 429

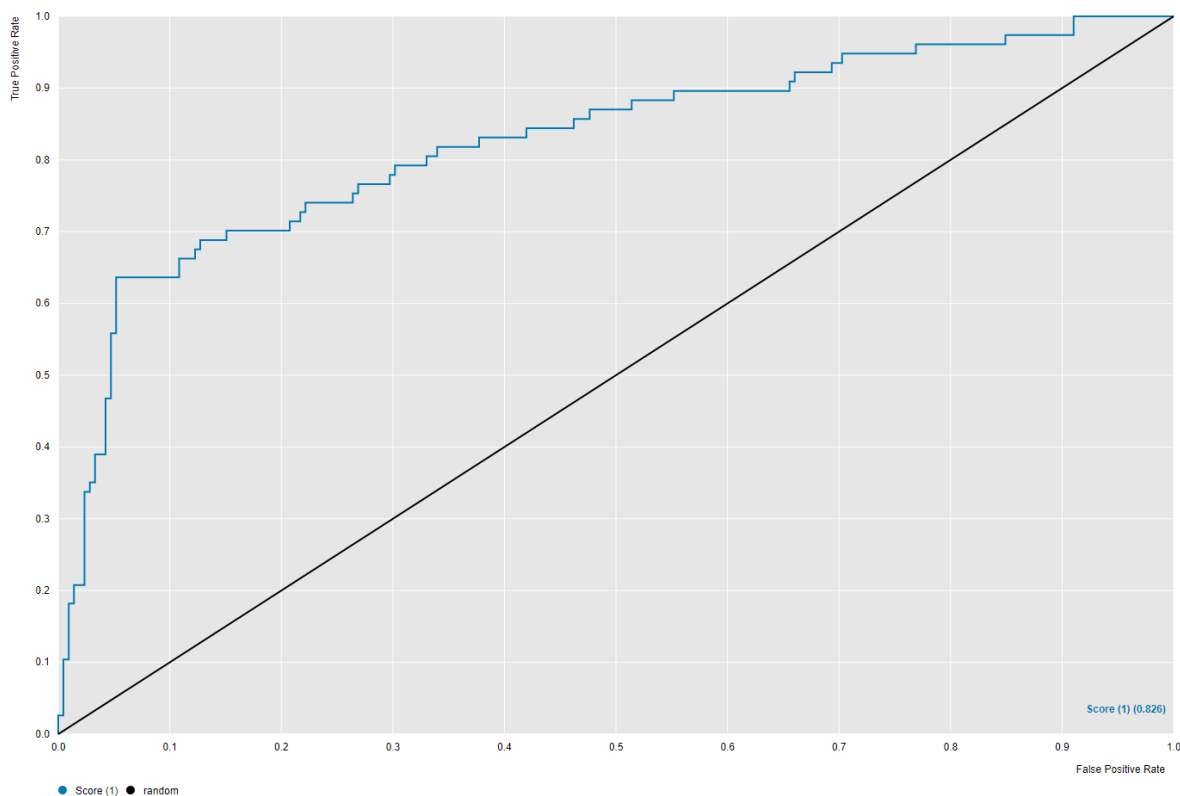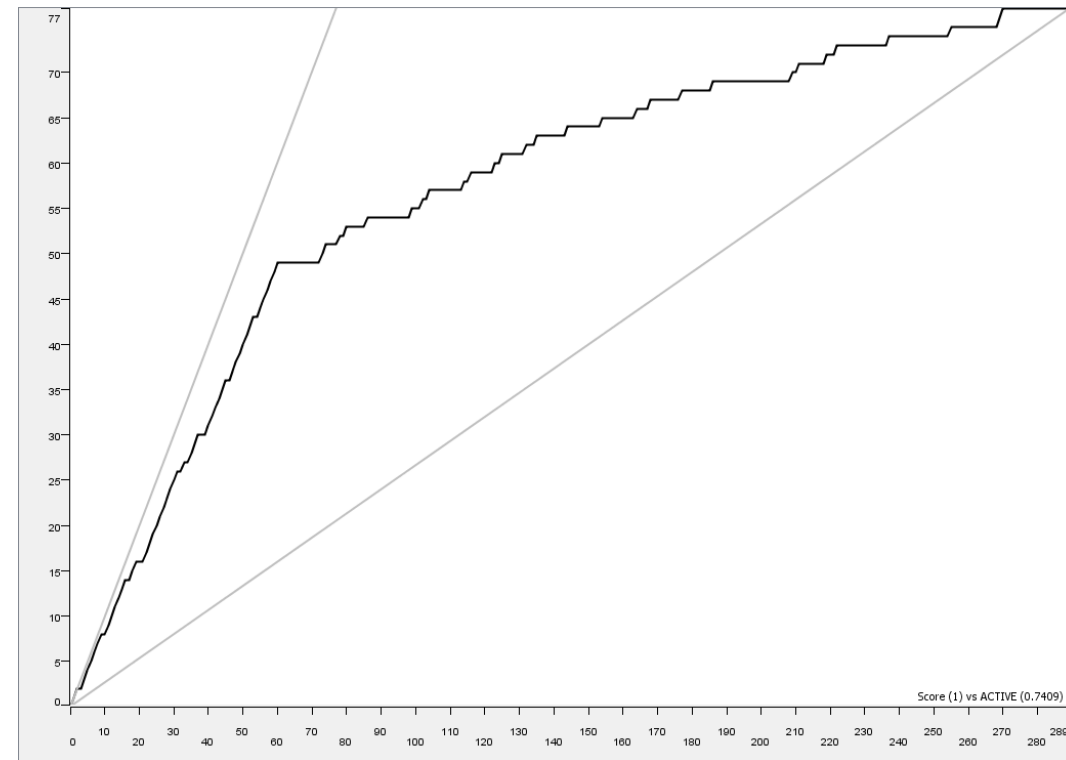

N=289

|                      |                                     |
|----------------------|-------------------------------------|
| Top 10% Mean<br>IC50 | 39.9 nM<br>(one 800 nM<br>compound) |
|----------------------|-------------------------------------|

|          | Predicted Active | Predicted Inactive |
|----------|------------------|--------------------|
| Active   | 39               | 38                 |
| Inactive | 10               | 202                |

# <15 nM DefGood in c-Abl, 45% error; Random seed = 429

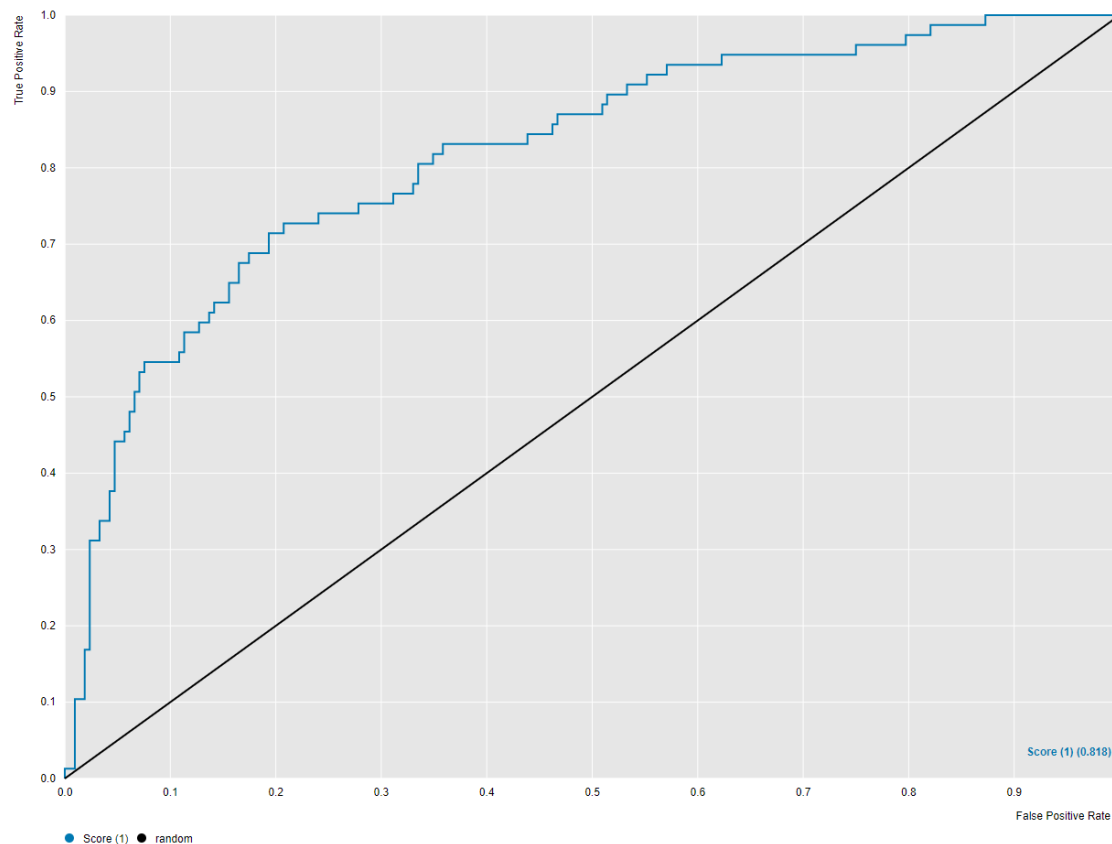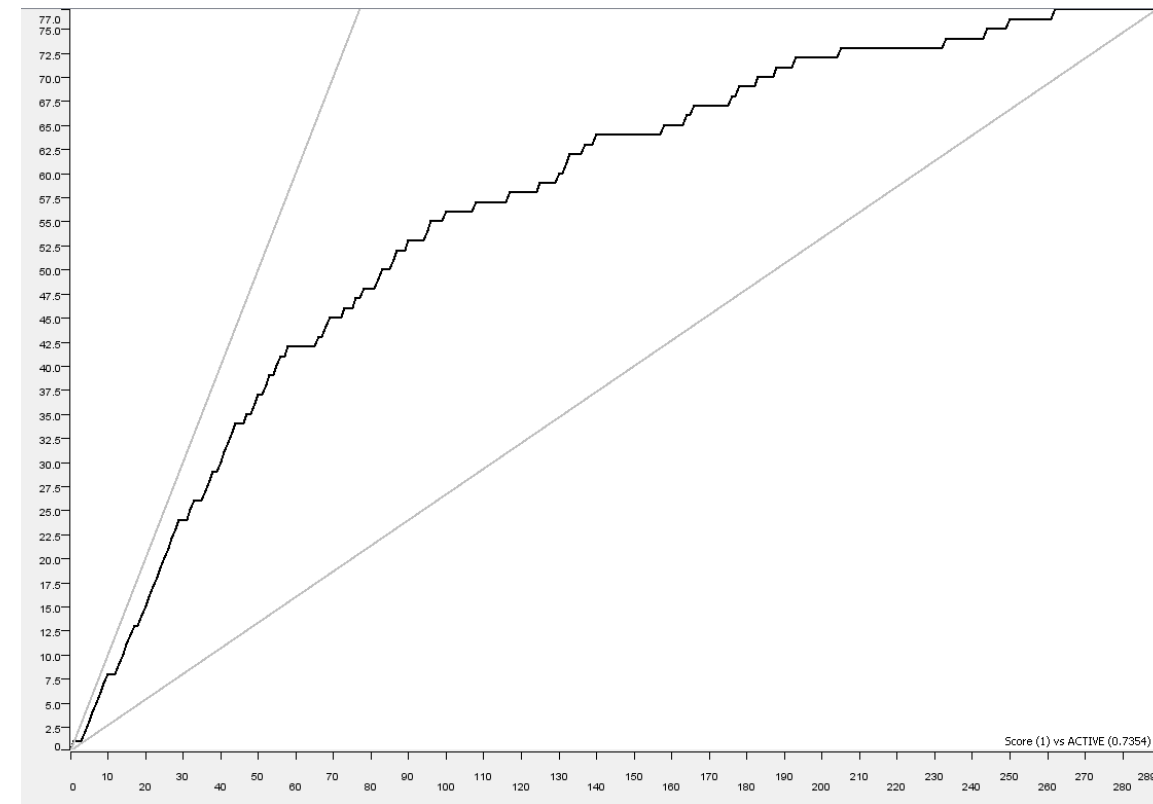

N=289

|                      |                                     |
|----------------------|-------------------------------------|
| Top 10% Mean<br>IC50 | 13.5 nM<br>(one 800 nM<br>compound) |
|----------------------|-------------------------------------|

|          | Predicted Active | Predicted Inactive |
|----------|------------------|--------------------|
| Active   | 20               | 57                 |
| Inactive | 5                | 207                |

# <15 nM DefGood in c-Abl, 50% error; Random seed = 429

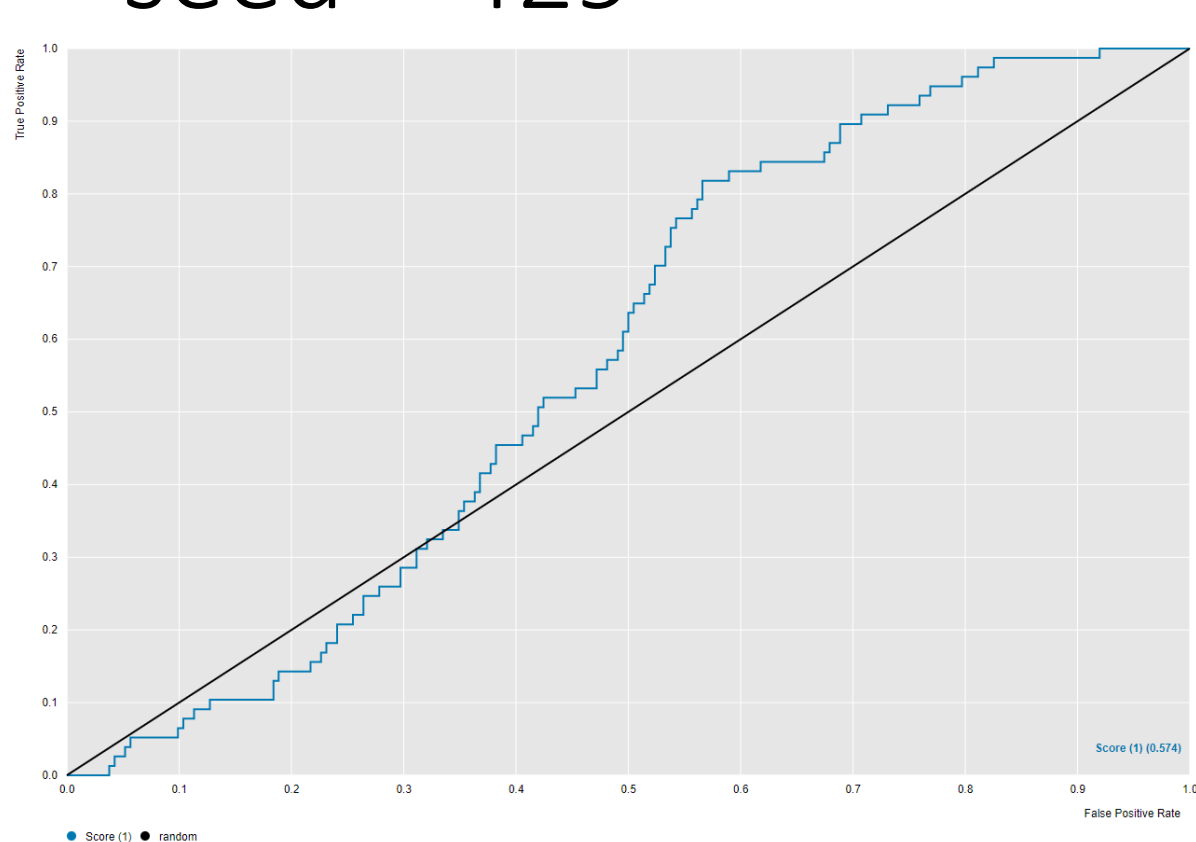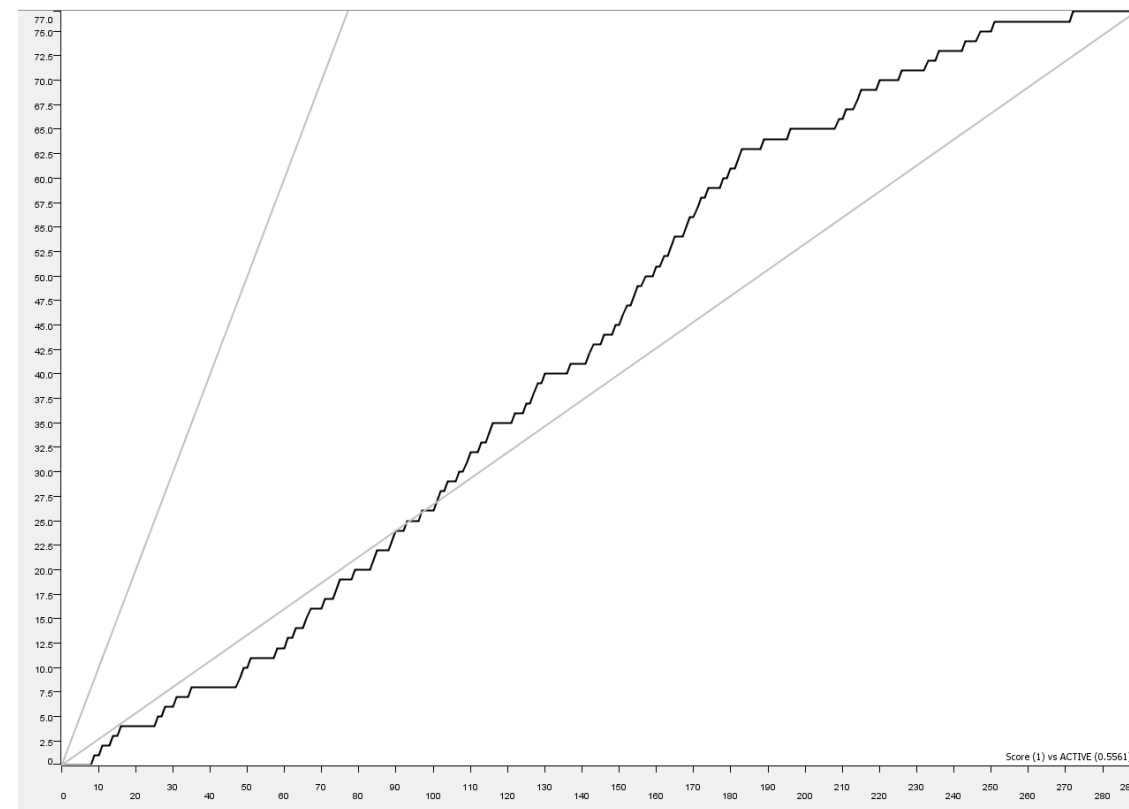

N=289

Top 10% Mean  
IC50

4,200 nM

|          | Predicted Active | Predicted Inactive |
|----------|------------------|--------------------|
| Active   | 77               | 0                  |
| Inactive | 204              | 8                  |



# <15 nM DefGood in c-Abl, 10% error; Random seed = 121783

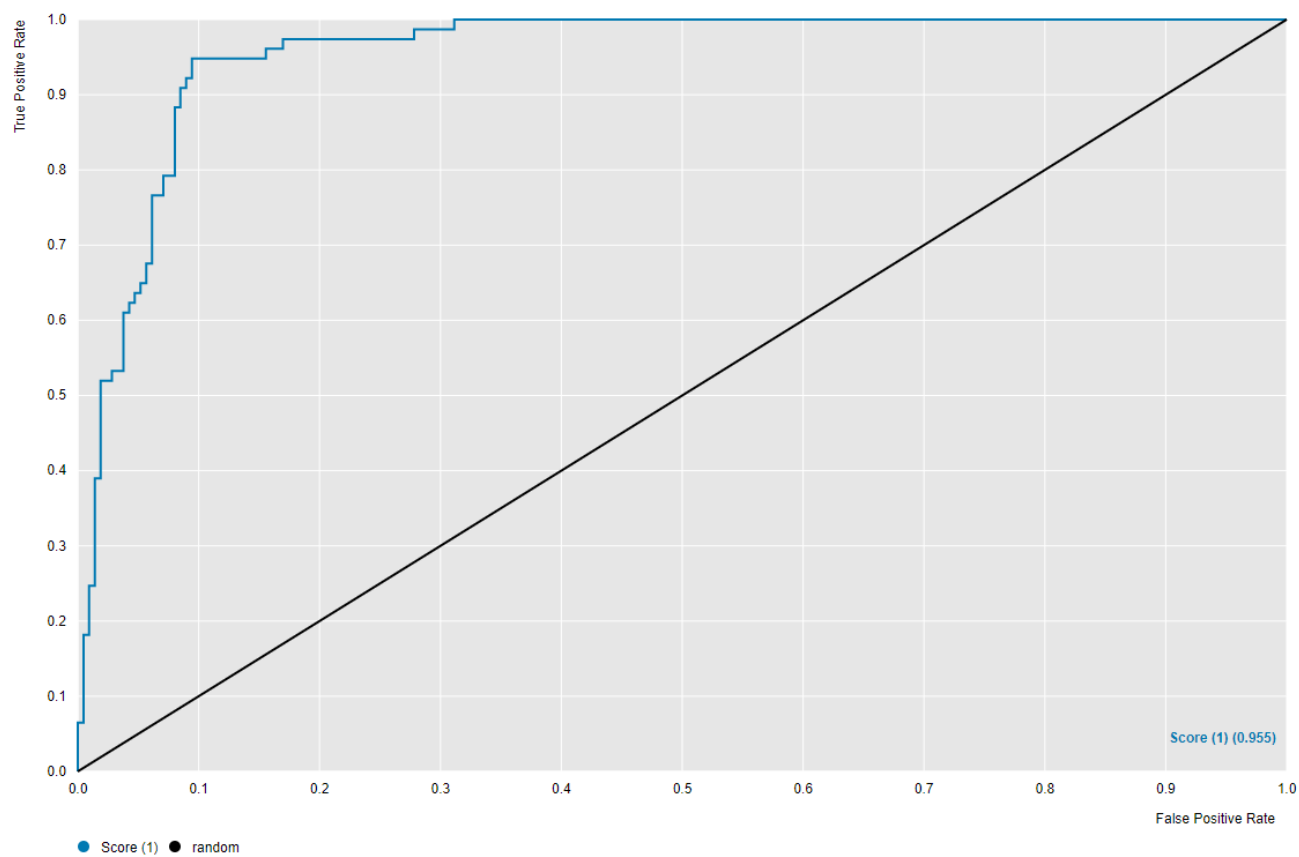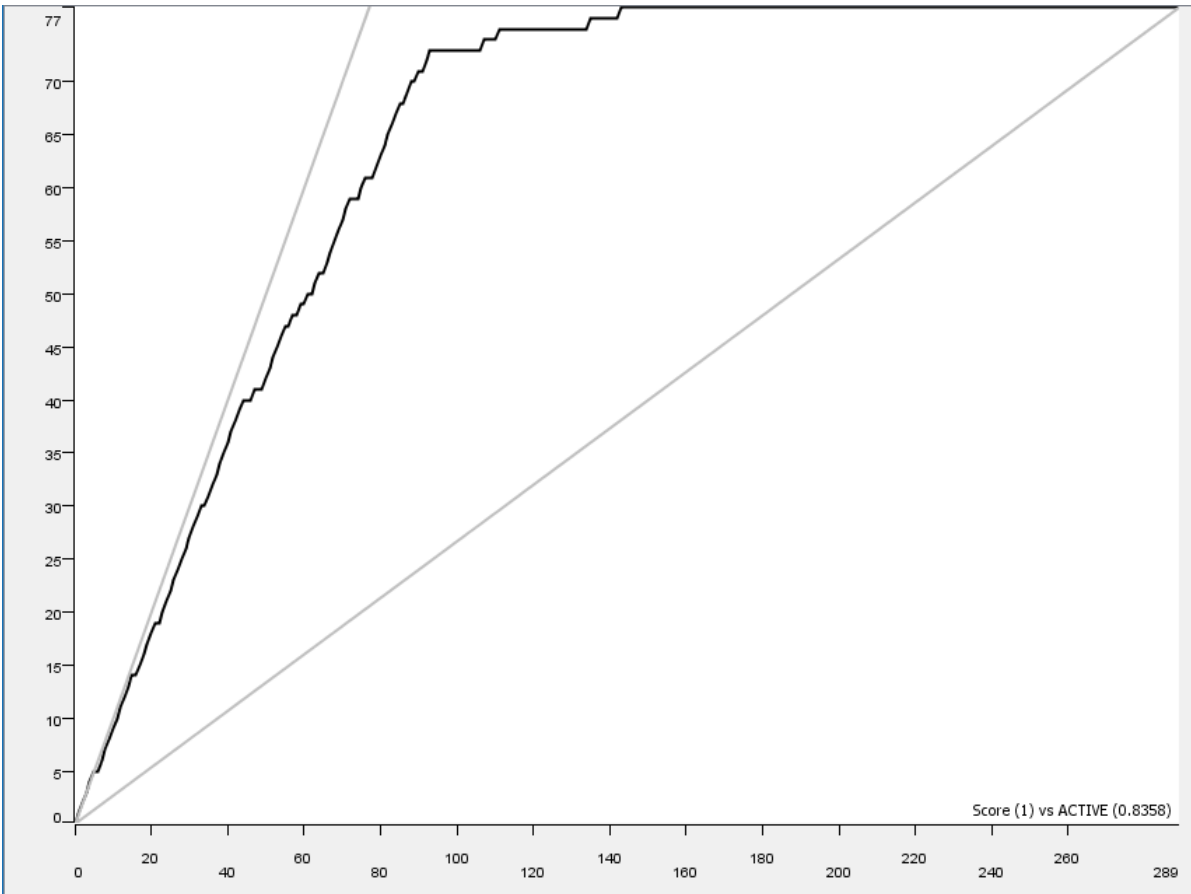

N=289

|                   |                                    |
|-------------------|------------------------------------|
| Top 10% Mean IC50 | 101.7 nM<br>(3 > 800 nM compounds) |
|-------------------|------------------------------------|

|          | Predicted Active | Predicted Inactive |
|----------|------------------|--------------------|
| Active   | 73               | 4                  |
| Inactive | 27               | 185                |

# <15 nM DefGood in c-Abl, 20% error; Random seed = 121783

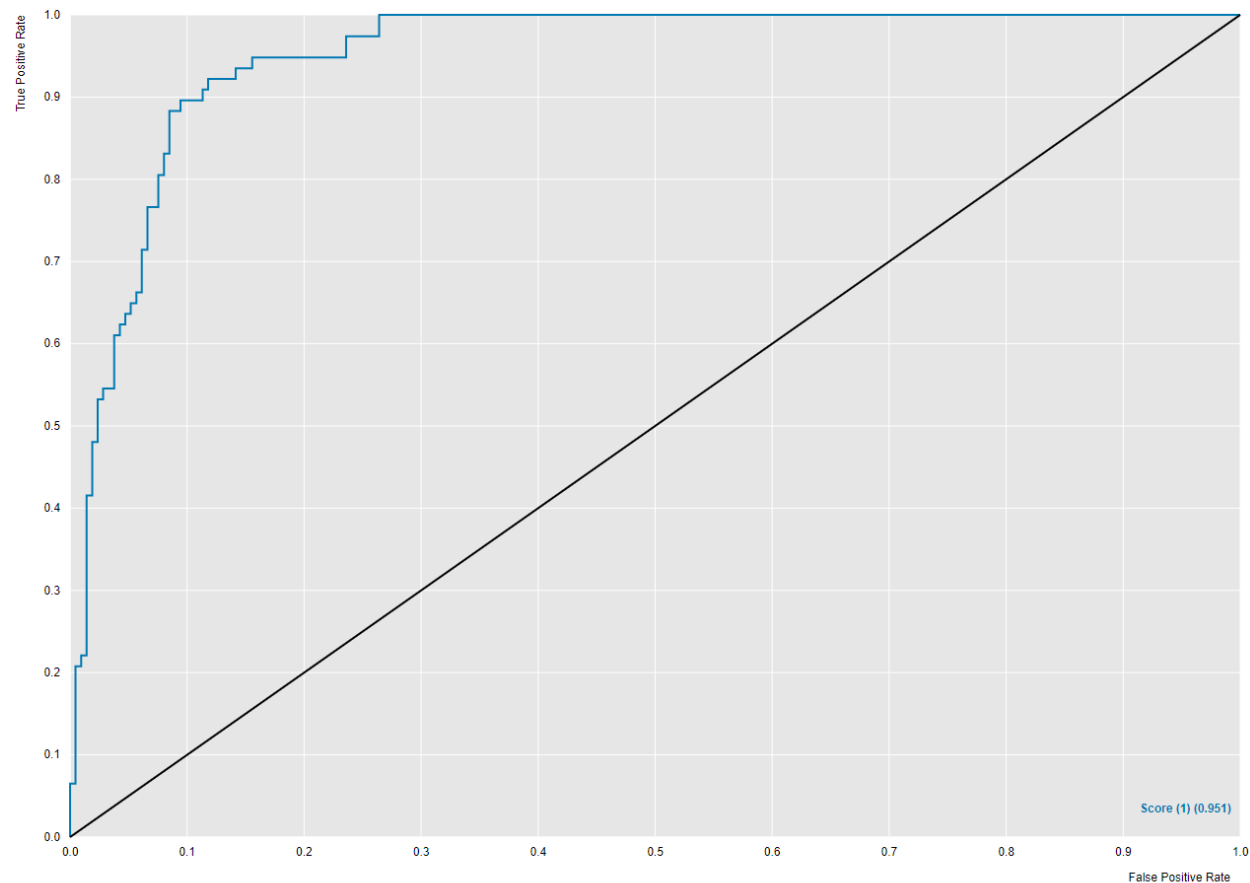

N=289

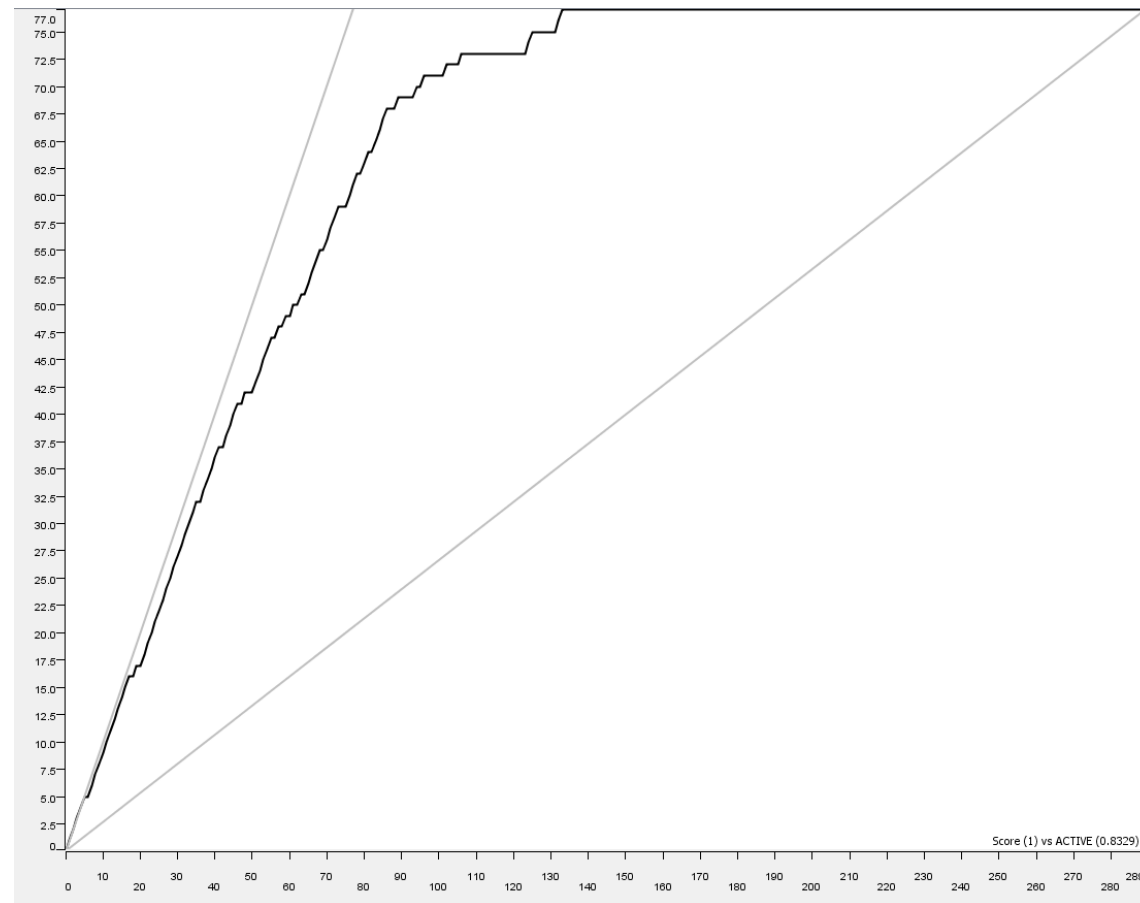

**Top 10% Mean  
IC50**

**101.8 nM  
(3 > 800 nM  
compounds)**

|          | Predicted Active | Predicted Inactive |
|----------|------------------|--------------------|
| Active   | 64               | 13                 |
| Inactive | 17               | 195                |

# <15 nM DefGood in c-Abl, 40% error; Random seed = 121783

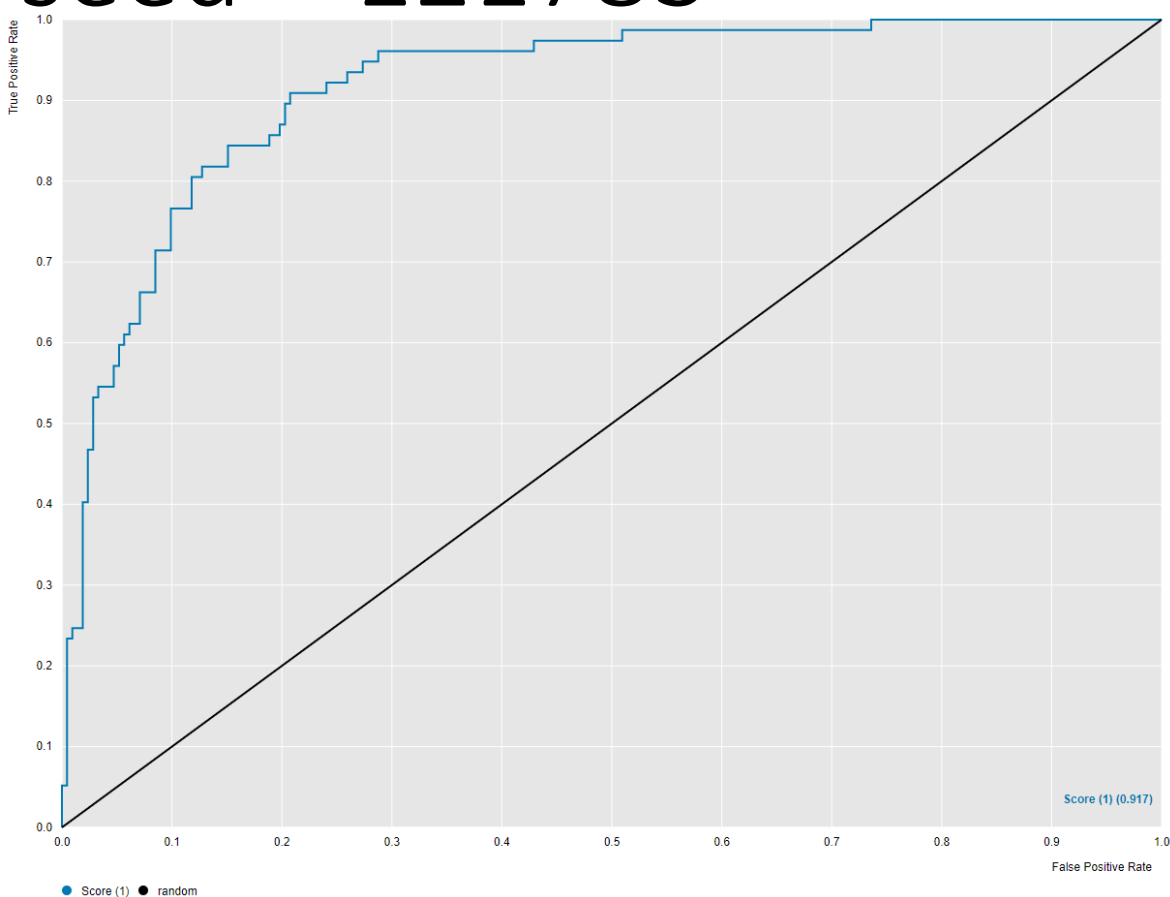

N=289

|                   |                                    |
|-------------------|------------------------------------|
| Top 10% Mean IC50 | 112.3 nM<br>(3 > 800 nM compounds) |
|-------------------|------------------------------------|

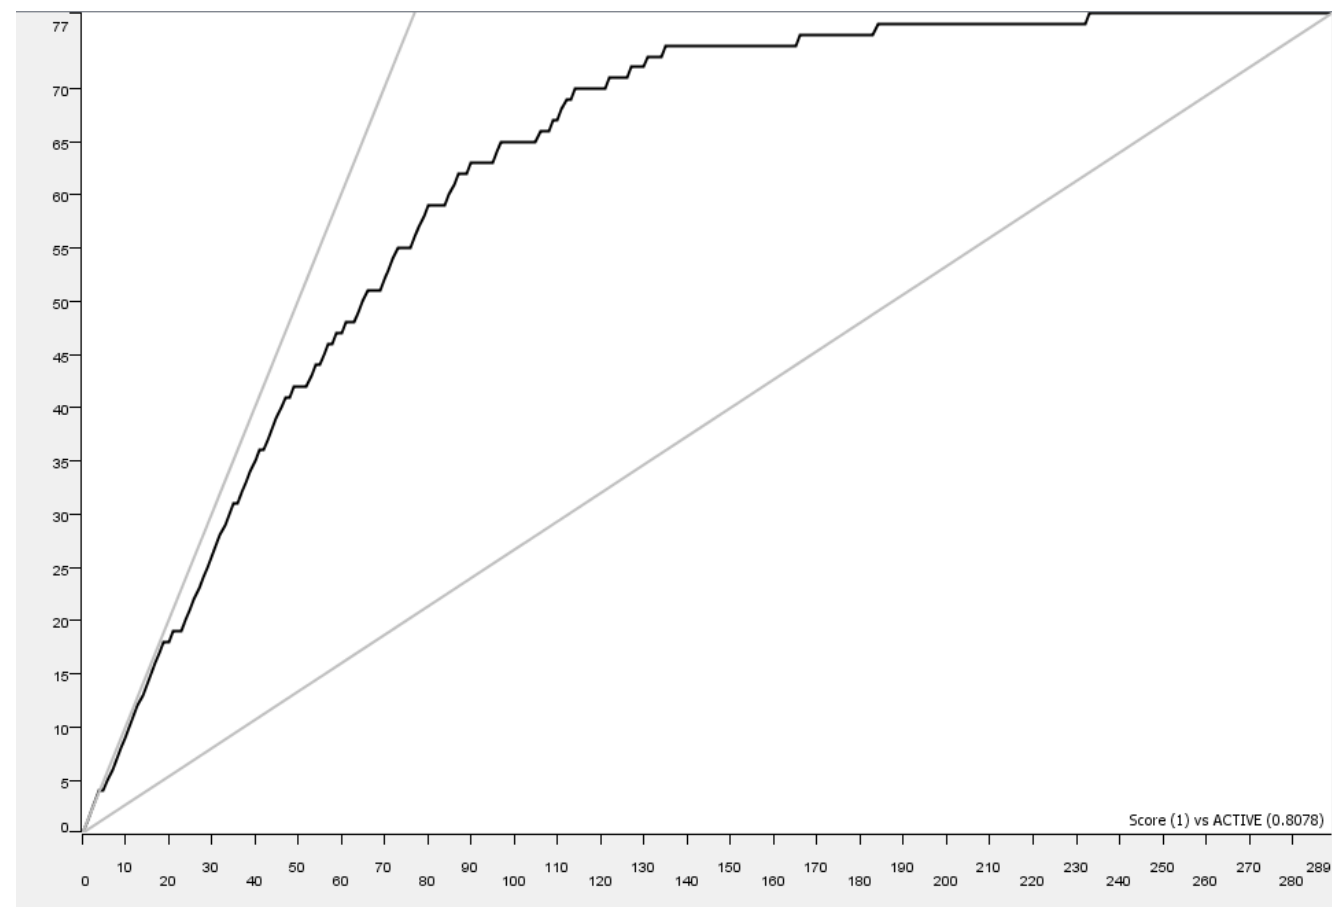

|          | Predicted Active | Predicted Inactive |
|----------|------------------|--------------------|
| Active   | 59               | 18                 |
| Inactive | 23               | 189                |

# <15 nM DefGood in c-Abl, 45% error; Random seed = 121783

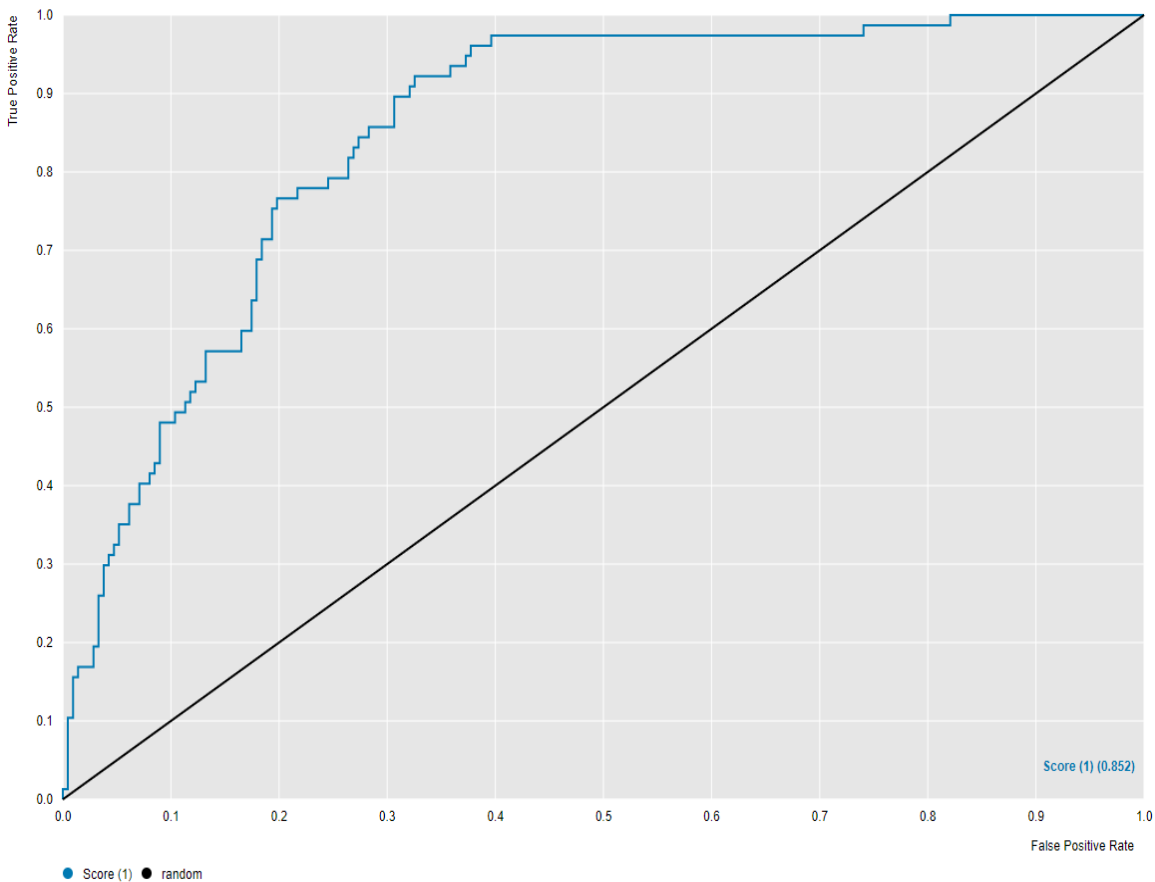

● Score (1) ● random

N=289

Top 10% Mean  
IC50

4,900 nM

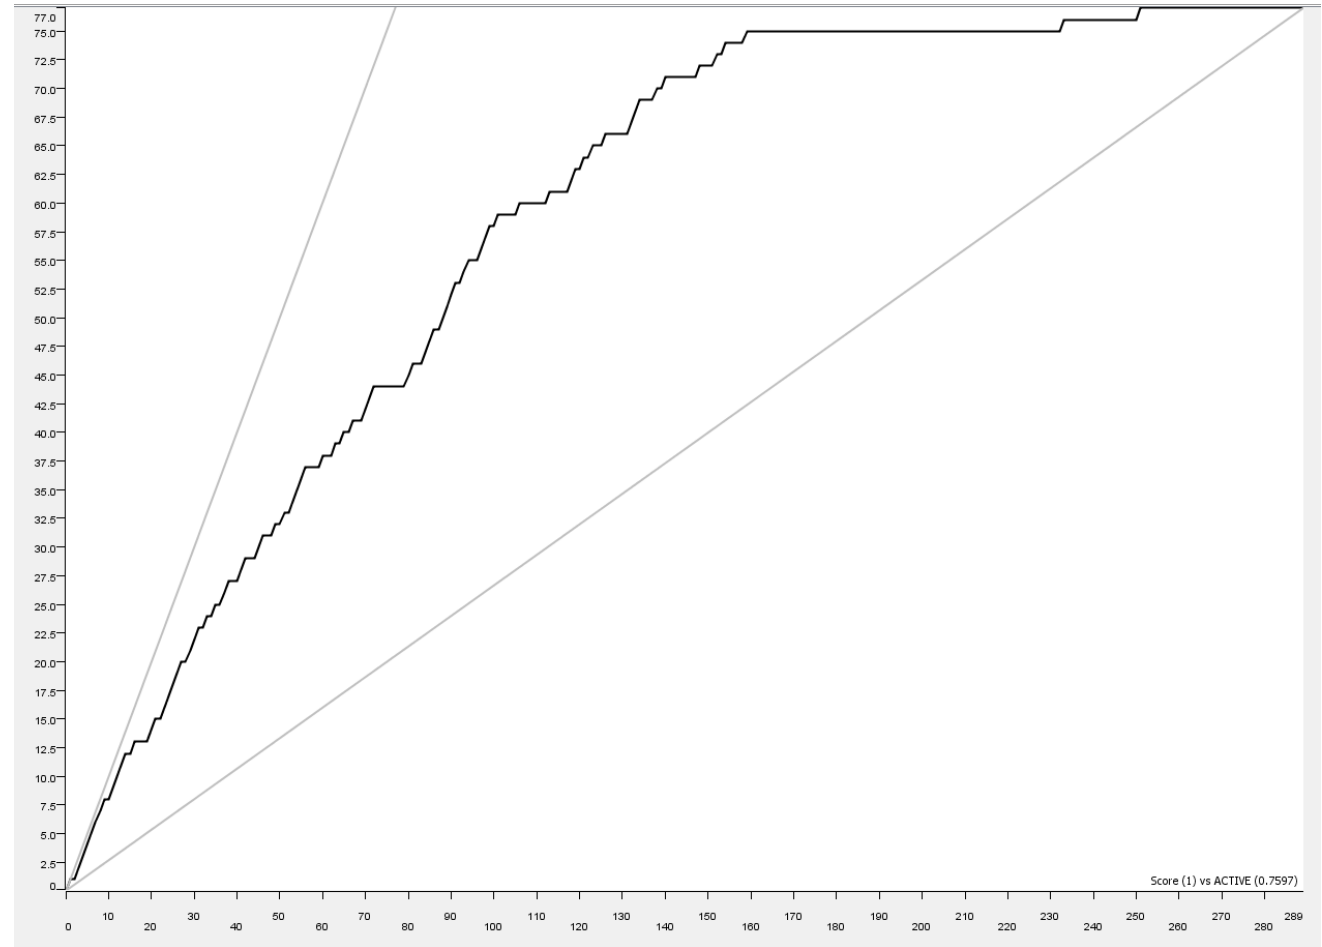

|          | Predicted Active | Predicted Inactive |
|----------|------------------|--------------------|
| Active   | 66               | 11                 |
| Inactive | 61               | 151                |

<15 nM DefGood in c-Abl, 50% error; Random seed = 121783

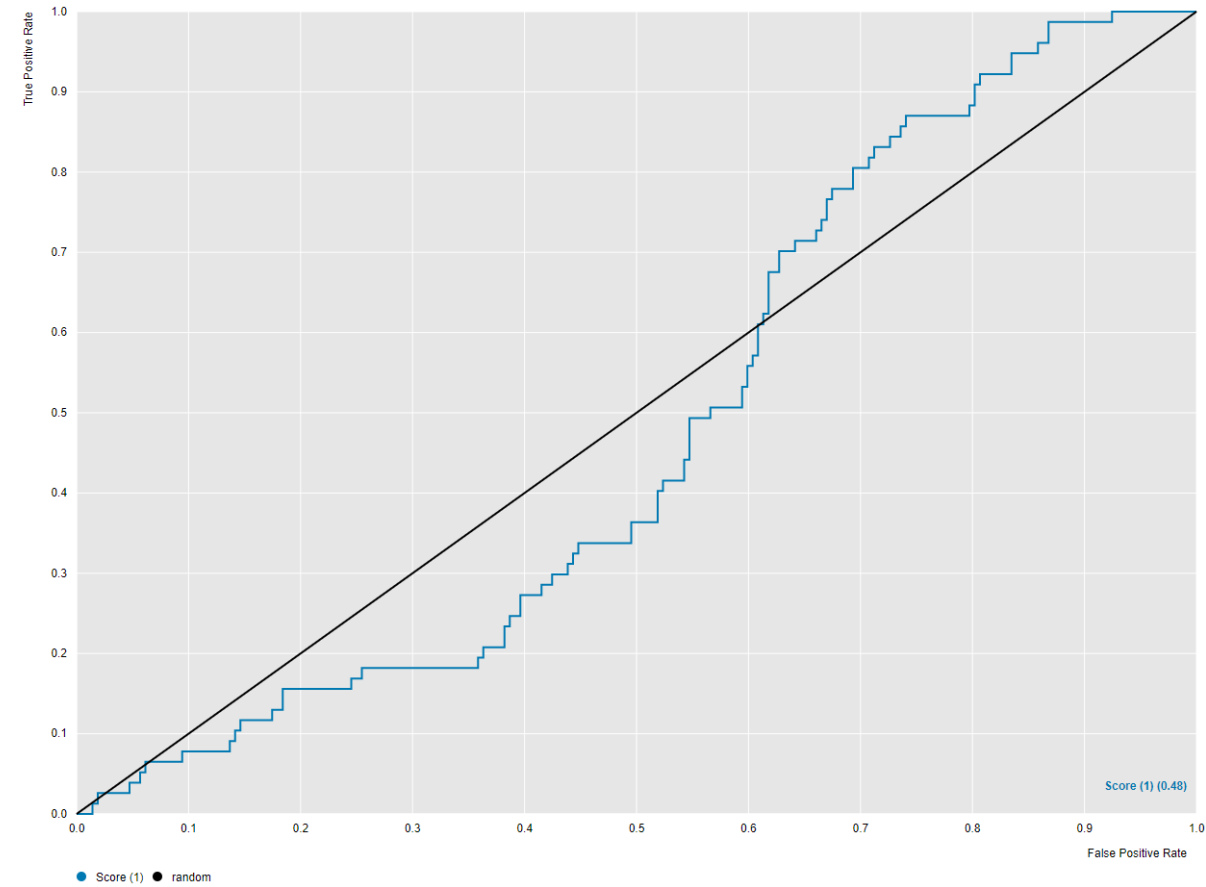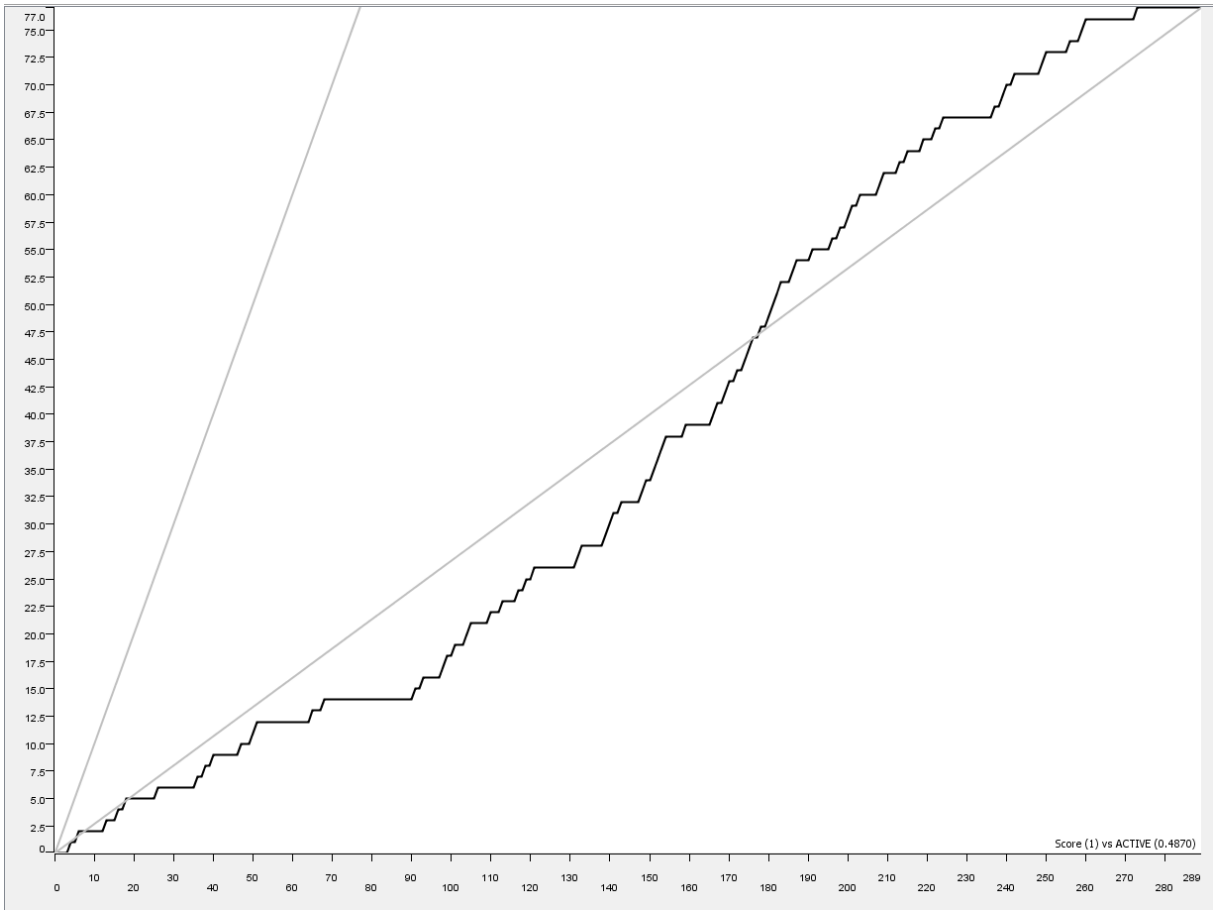

N=289

|                   |           |
|-------------------|-----------|
| Top 10% Mean IC50 | 15,000 nM |
|-------------------|-----------|

|          | Predicted Active | Predicted Inactive |
|----------|------------------|--------------------|
| Active   | 77               | 0                  |
| Inactive | 207              | 5                  |

# Conclusion - NBN

- Across three random seeds, the % error that lead to a significant enrichment failure and top 10% IC50 increase in the retrospective test was 45%, 50% and 45% for each unique random seed.
- An NBN can be very tolerant of data error in the c-Abl space.

RF - <15 nM DefGood in c-Abl, 5% error ;  
Random seed = 1515533876005

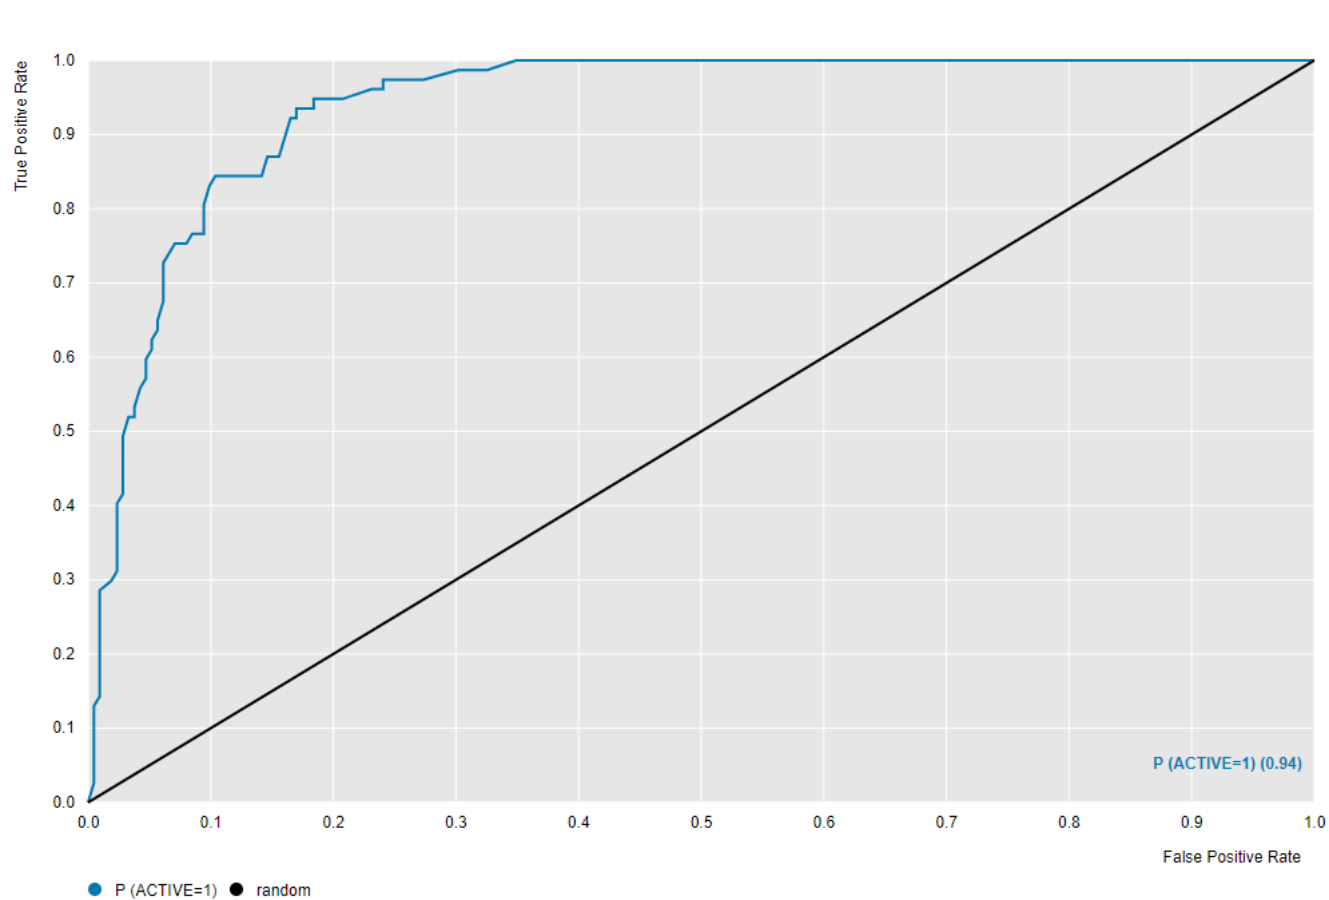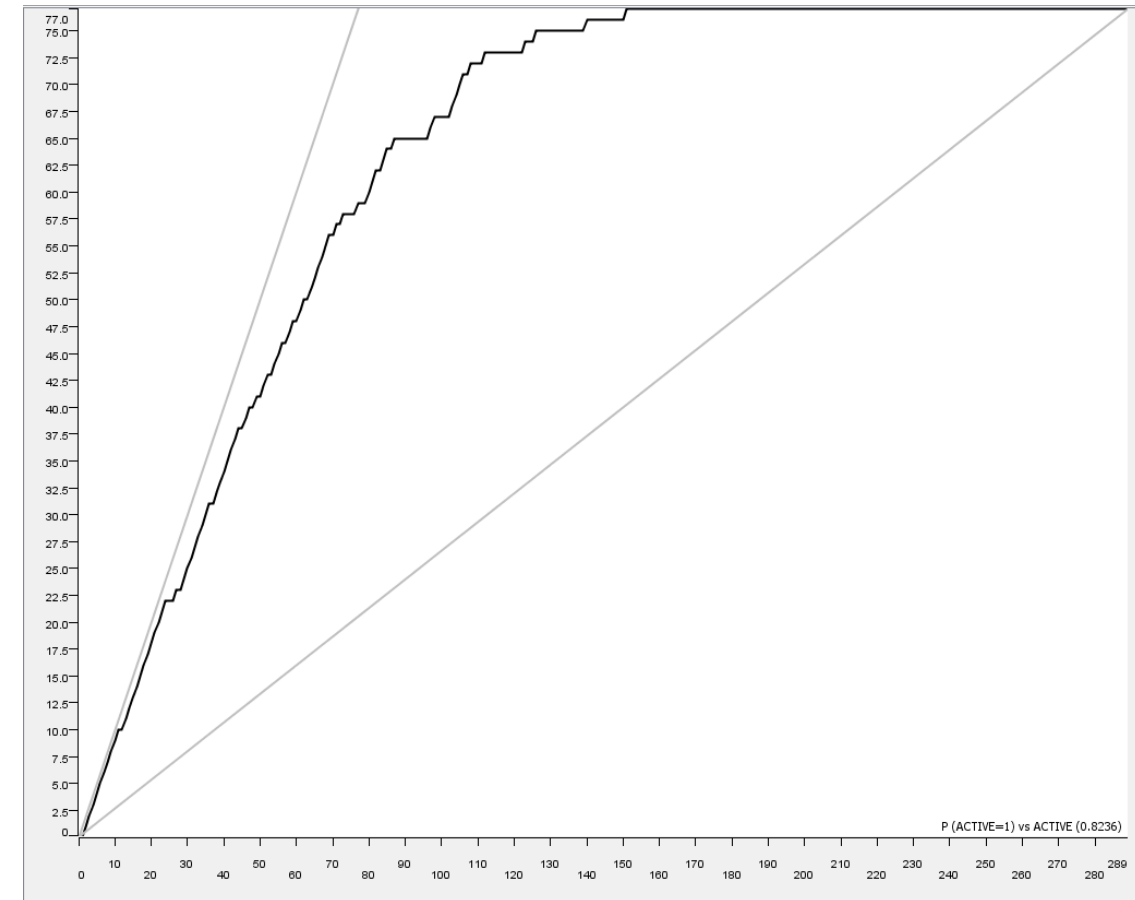

N=289

|                      |                                     |
|----------------------|-------------------------------------|
| Top 10% Mean<br>IC50 | 45.7 nM<br>(one 800 nM<br>compound) |
|----------------------|-------------------------------------|

|          | Predicted Active | Predicted Inactive |
|----------|------------------|--------------------|
| Active   | 59               | 18                 |
| Inactive | 19               | 193                |

# RF - <15 nM DefGood in c-Abl, 10% error

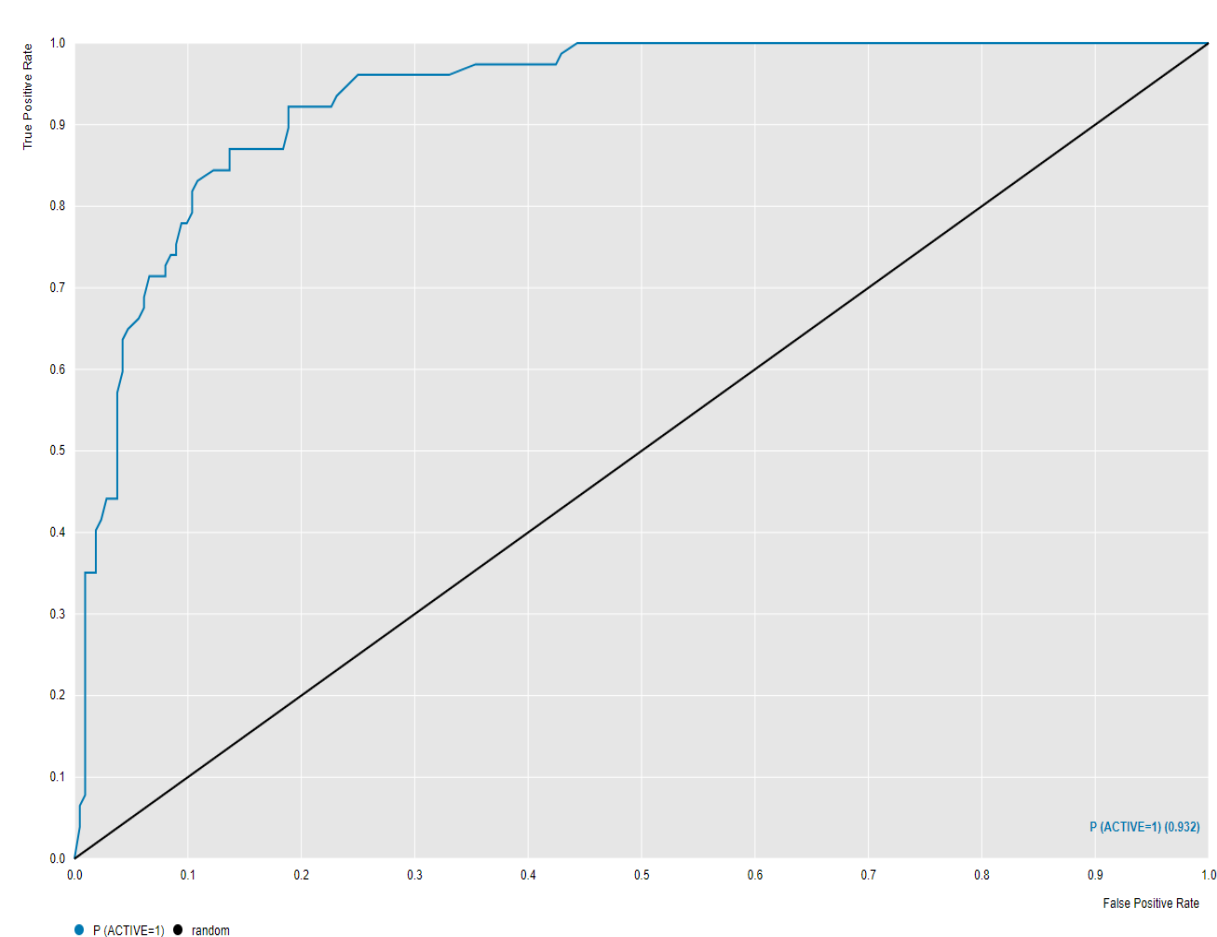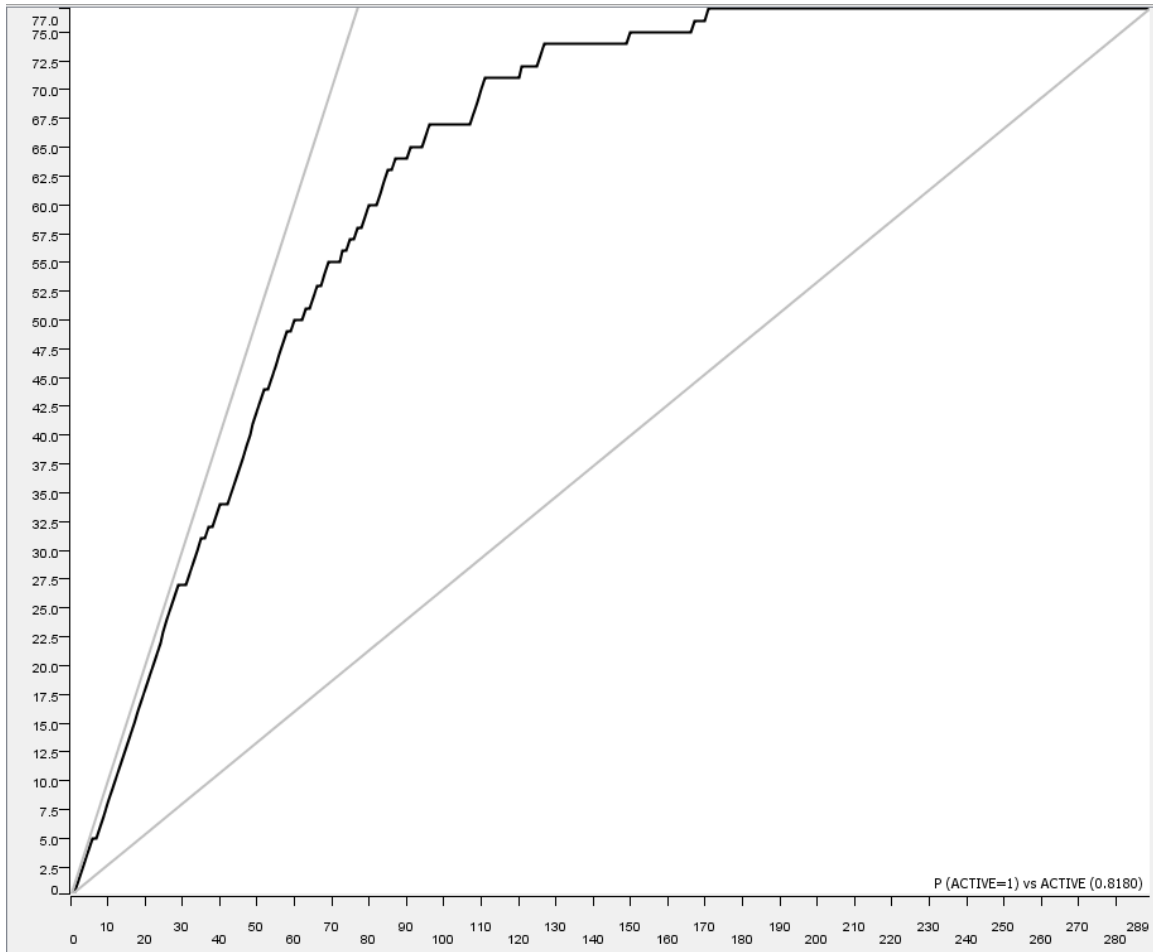

N=289

|                      |                                     |
|----------------------|-------------------------------------|
| Top 10% Mean<br>IC50 | 34.9 nM<br>(one 800 nM<br>compound) |
|----------------------|-------------------------------------|

|          | Predicted Active | Predicted Inactive |
|----------|------------------|--------------------|
| Active   | 60               | 17                 |
| Inactive | 20               | 192                |



# RF - <15 nM DefGood in c-Abl, 15% error

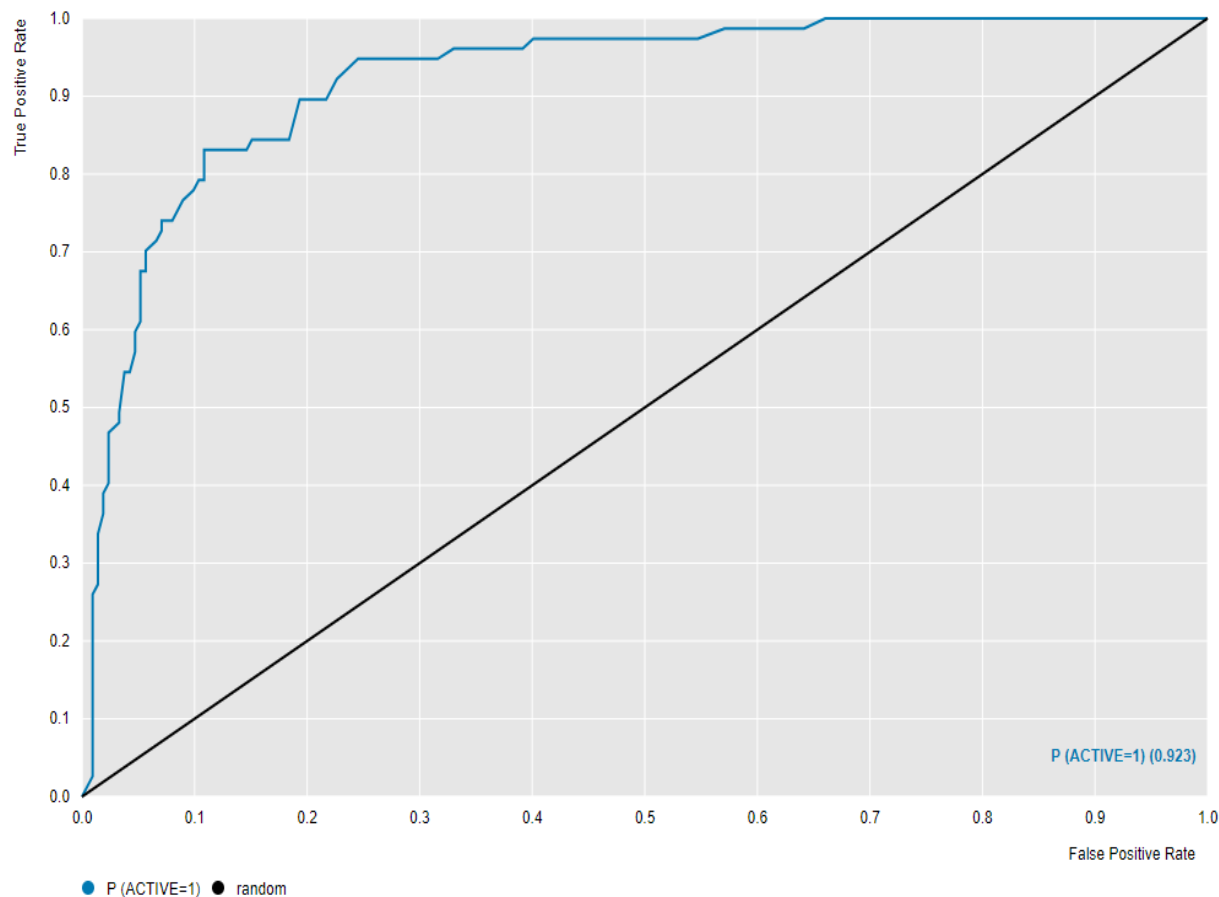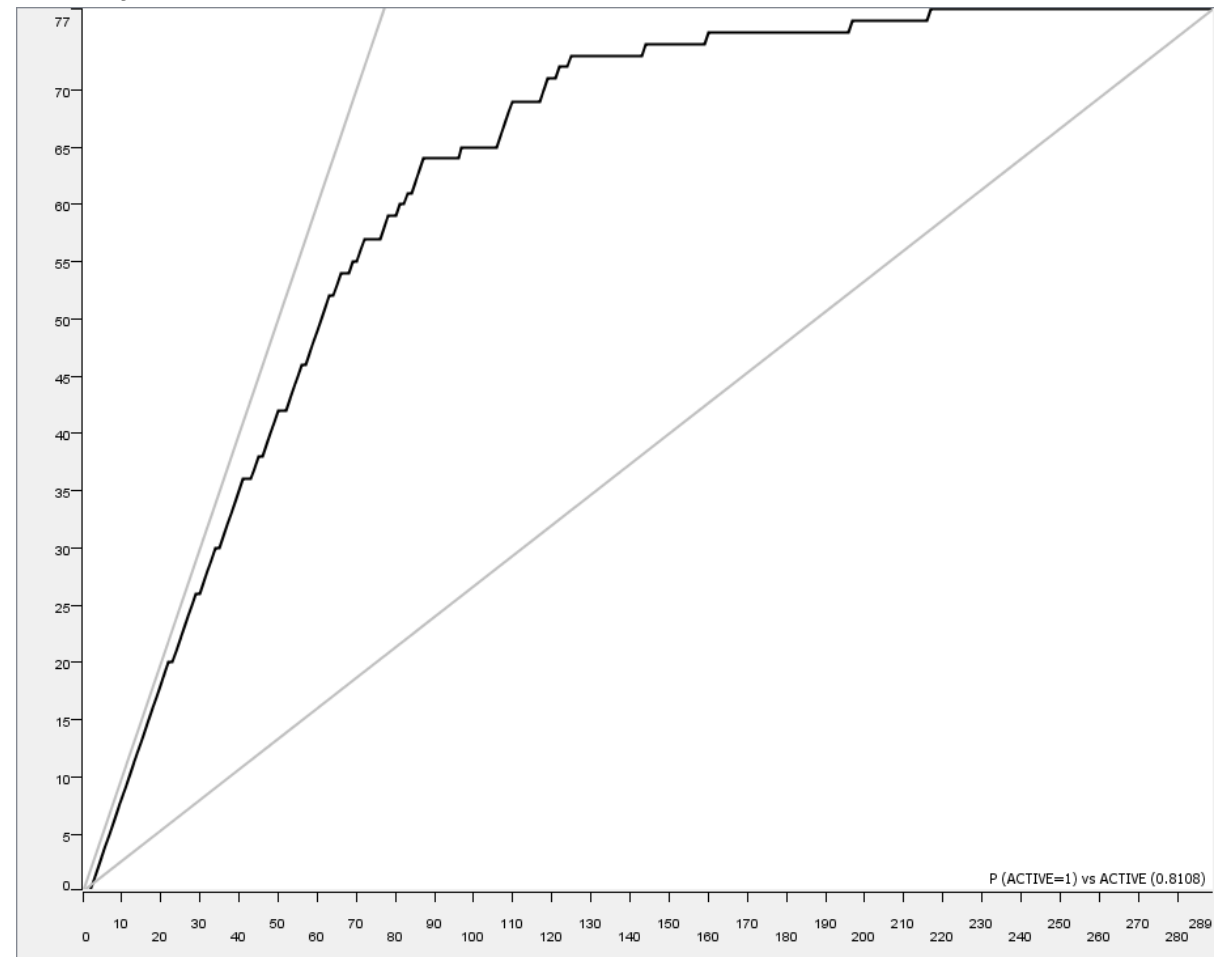

N=289

Top 10% Mean  
IC50

35.9 nM  
(one 800 nM  
compound)

|          | Predicted Active | Predicted Inactive |
|----------|------------------|--------------------|
| Active   | 61               | 16                 |
| Inactive | 22               | 190                |

# RF - <15 nM DefGood in c-Abl, 20% error

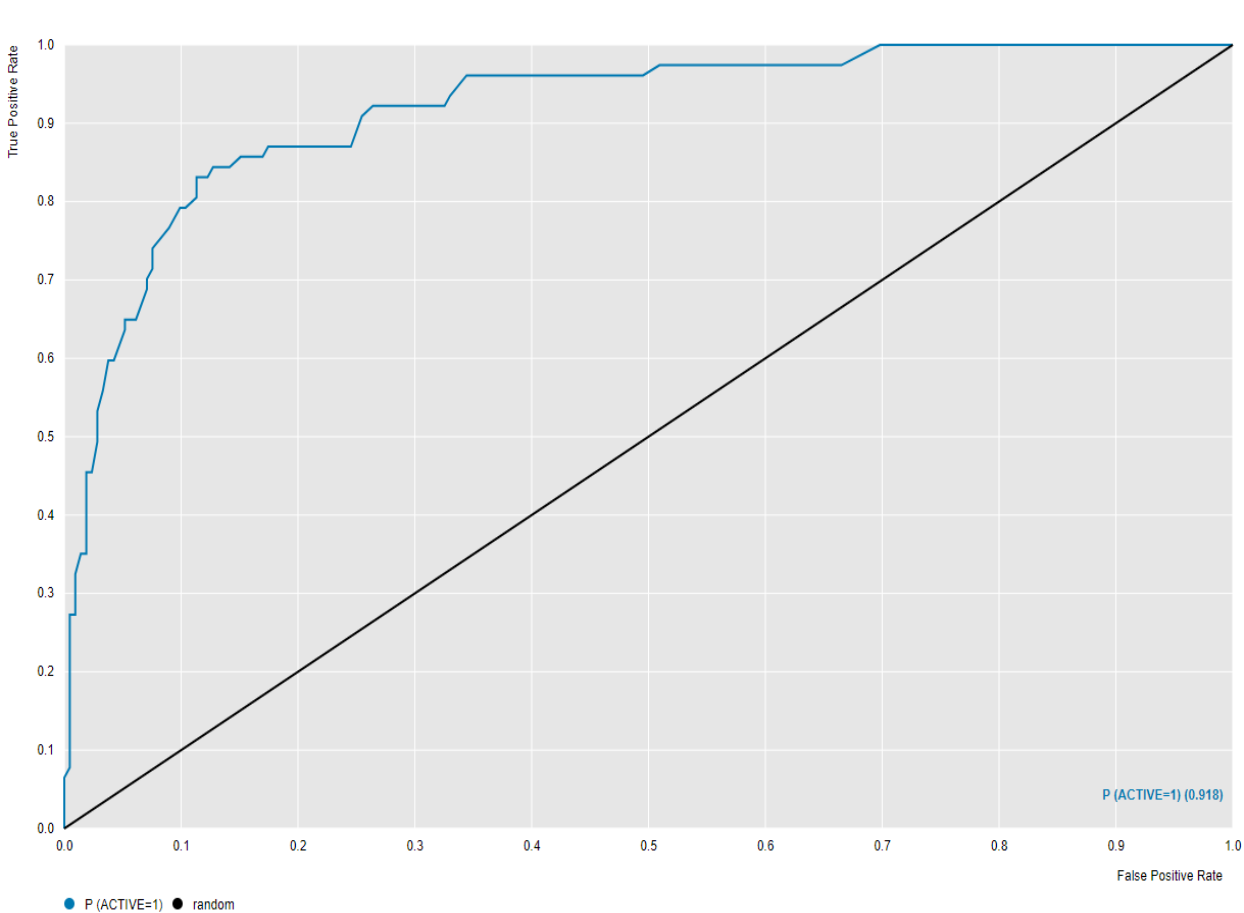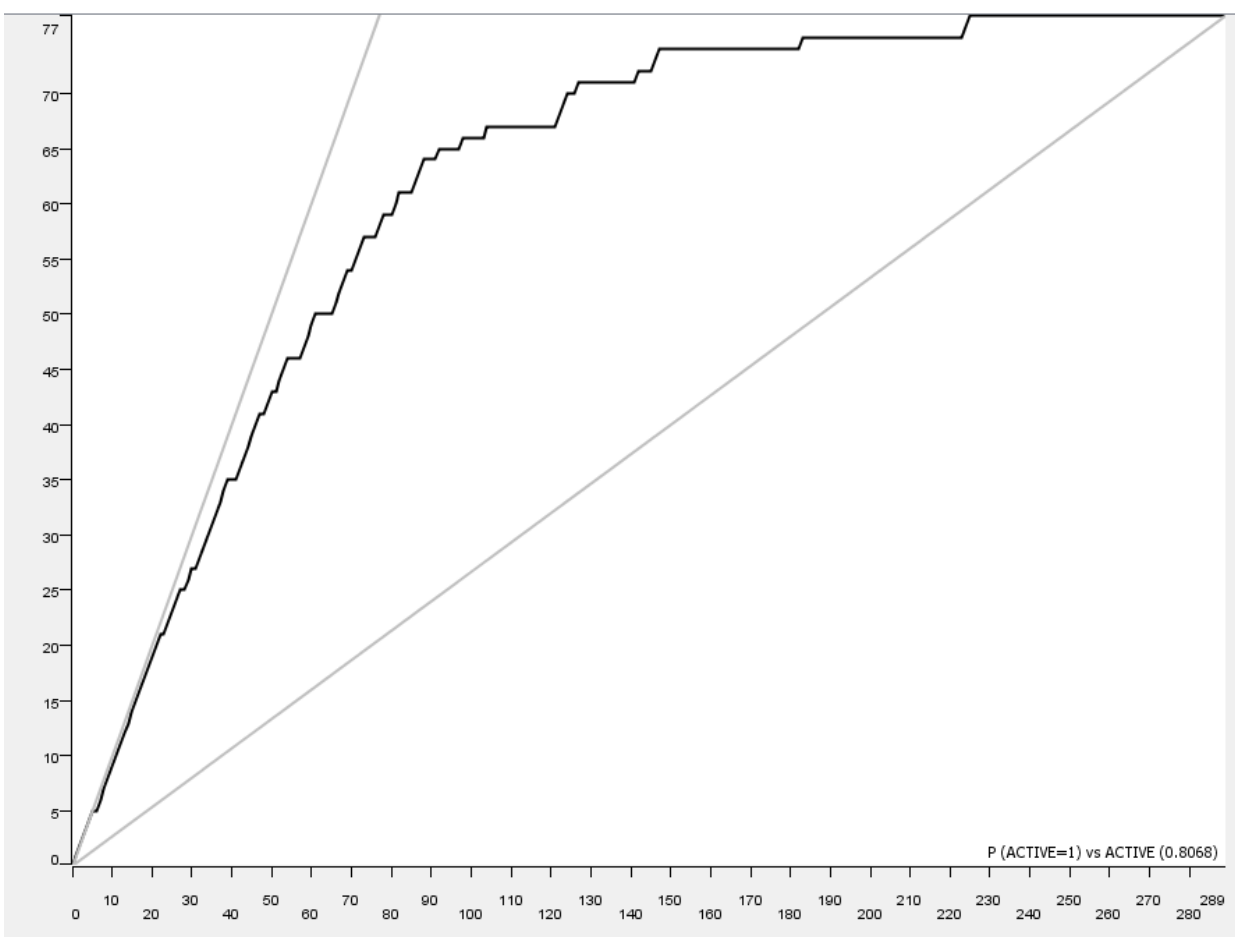

N=289

|                   |                                                        |
|-------------------|--------------------------------------------------------|
| Top 10% Mean IC50 | 140 nM<br>(one 800 nM compound, and one 3 uM compound) |
|-------------------|--------------------------------------------------------|

|          | Predicted Active | Predicted Inactive |
|----------|------------------|--------------------|
| Active   | 65               | 12                 |
| Inactive | 27               | 185                |

# RF - <15 nM DefGood in c-Abl, 30% error

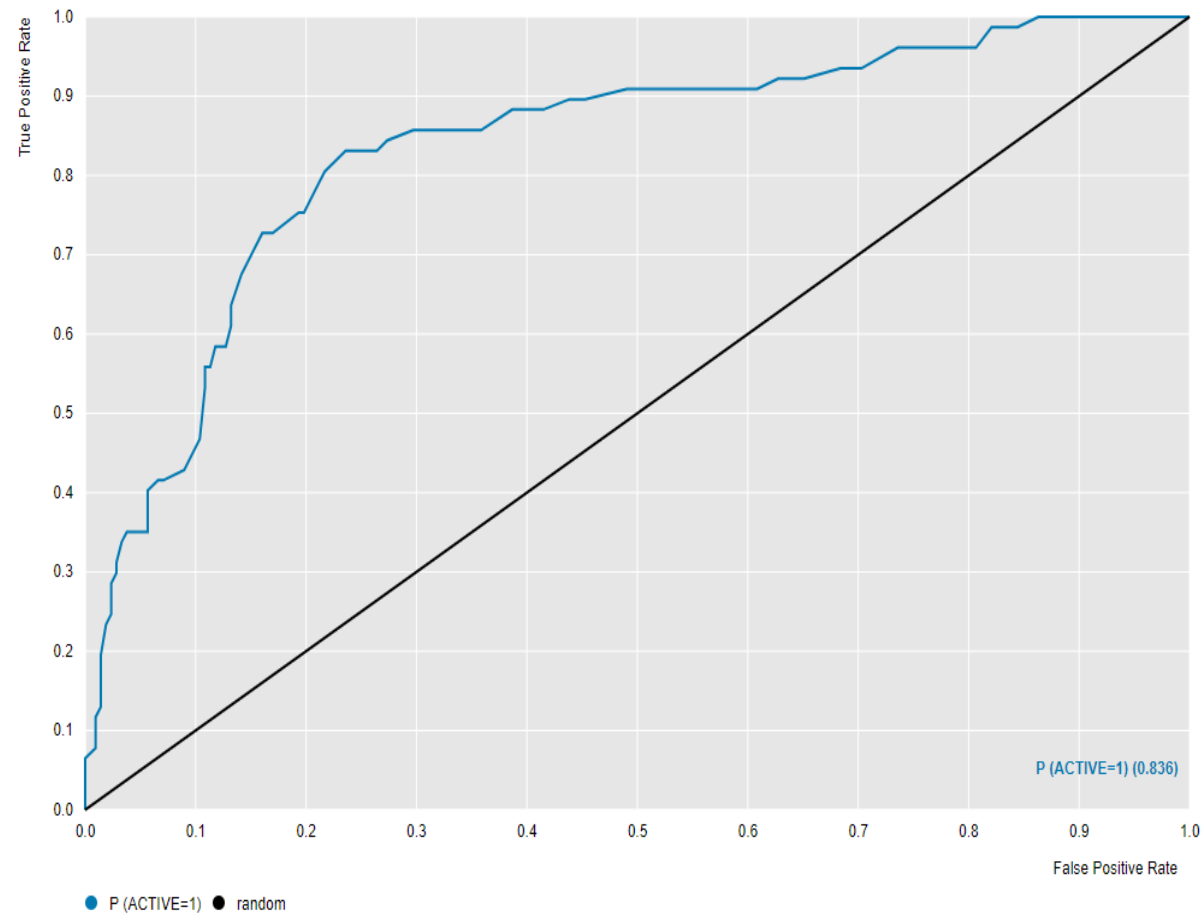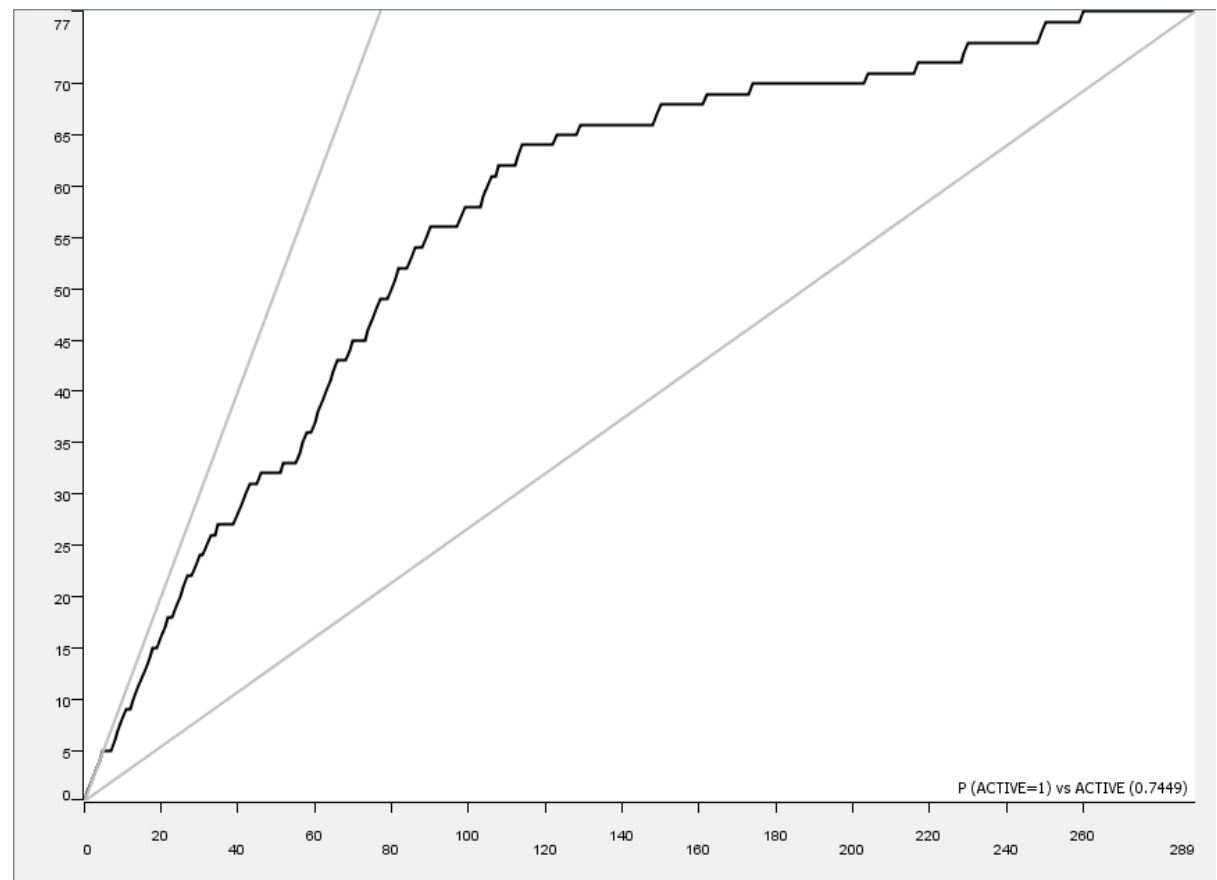

N=289

|                   |                                                        |
|-------------------|--------------------------------------------------------|
| Top 10% Mean IC50 | 140 nM<br>(one 800 nM compound, and one 3 uM compound) |
|-------------------|--------------------------------------------------------|

|          | Predicted Active | Predicted Inactive |
|----------|------------------|--------------------|
| Active   | 56               | 21                 |
| Inactive | 34               | 178                |

# RF - <15 nM DefGood in c-Abl, 35% error

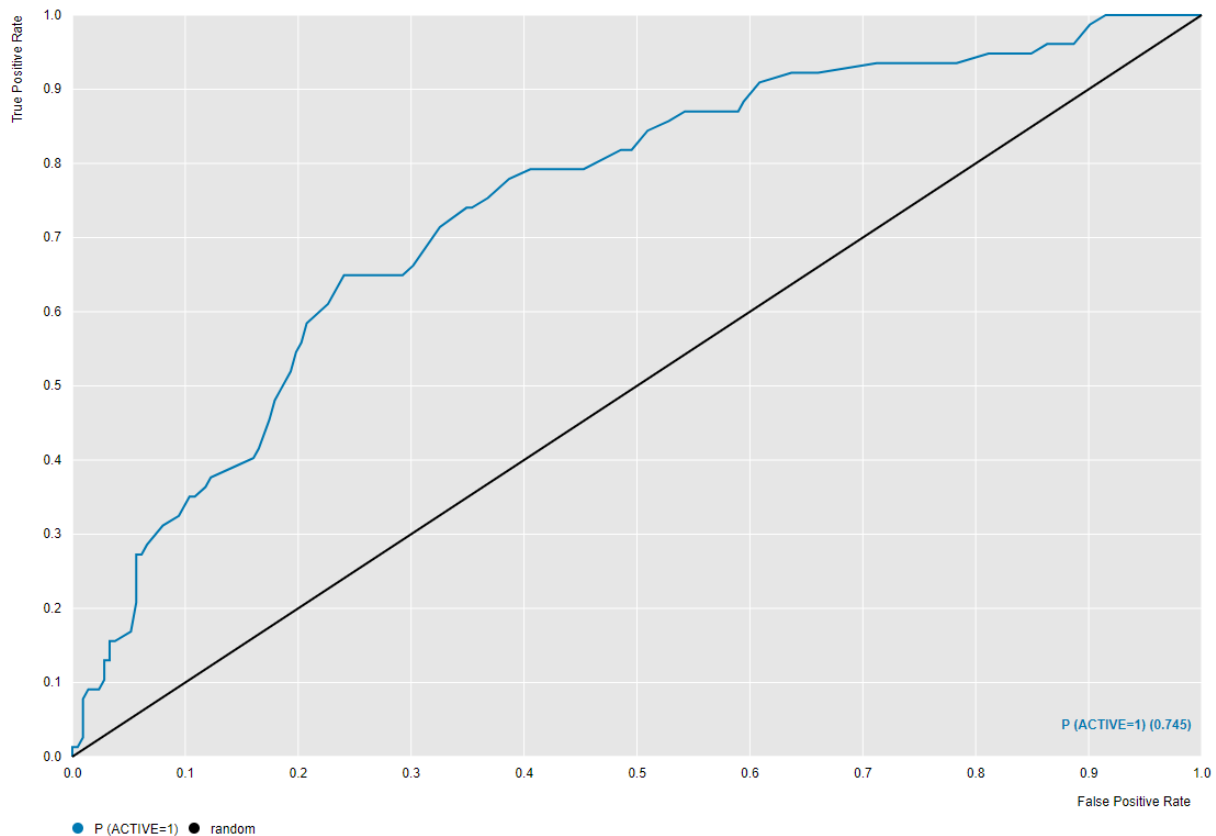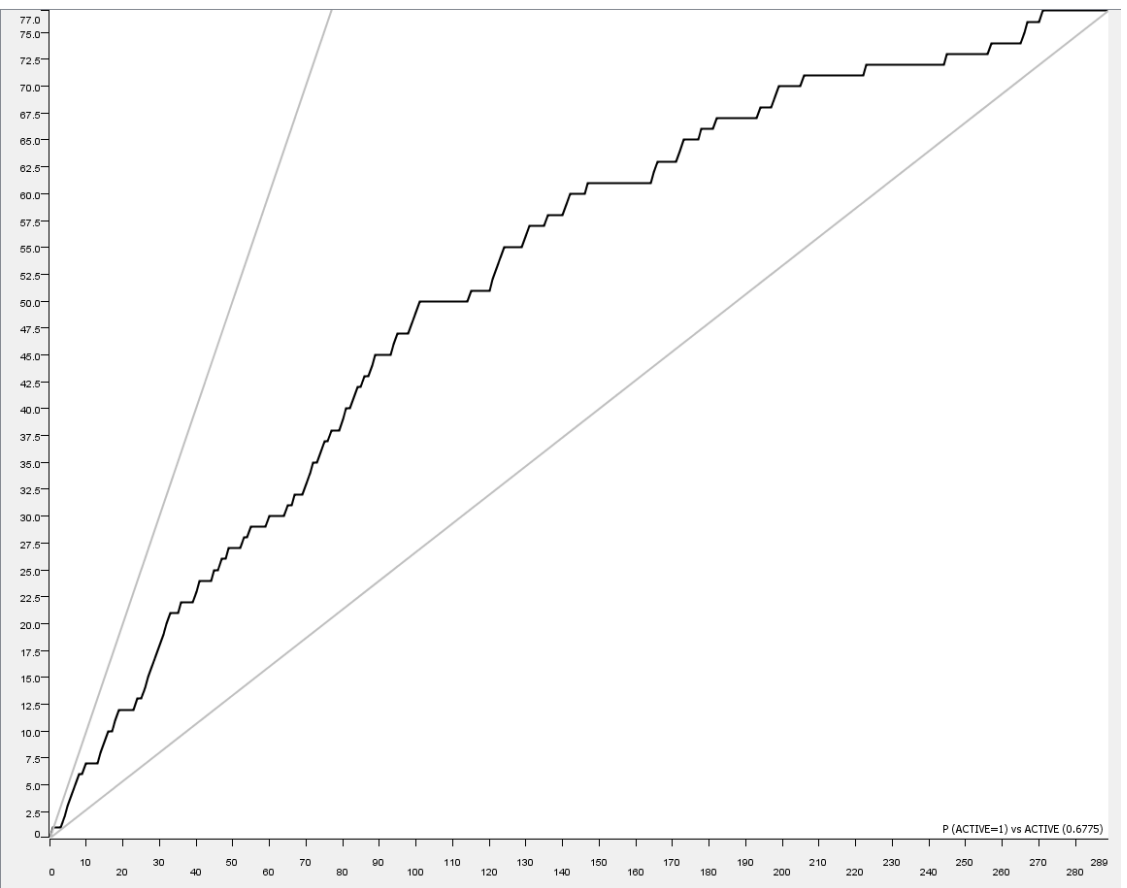

N=289

|                   |                                    |
|-------------------|------------------------------------|
| Top 10% Mean IC50 | 390 nM<br>(many micromolar errors) |
|-------------------|------------------------------------|

|          | Predicted Active | Predicted Inactive |
|----------|------------------|--------------------|
| Active   | 45               | 32                 |
| Inactive | 44               | 168                |

# RF - <15 nM DefGood in c-Abl, 40% error

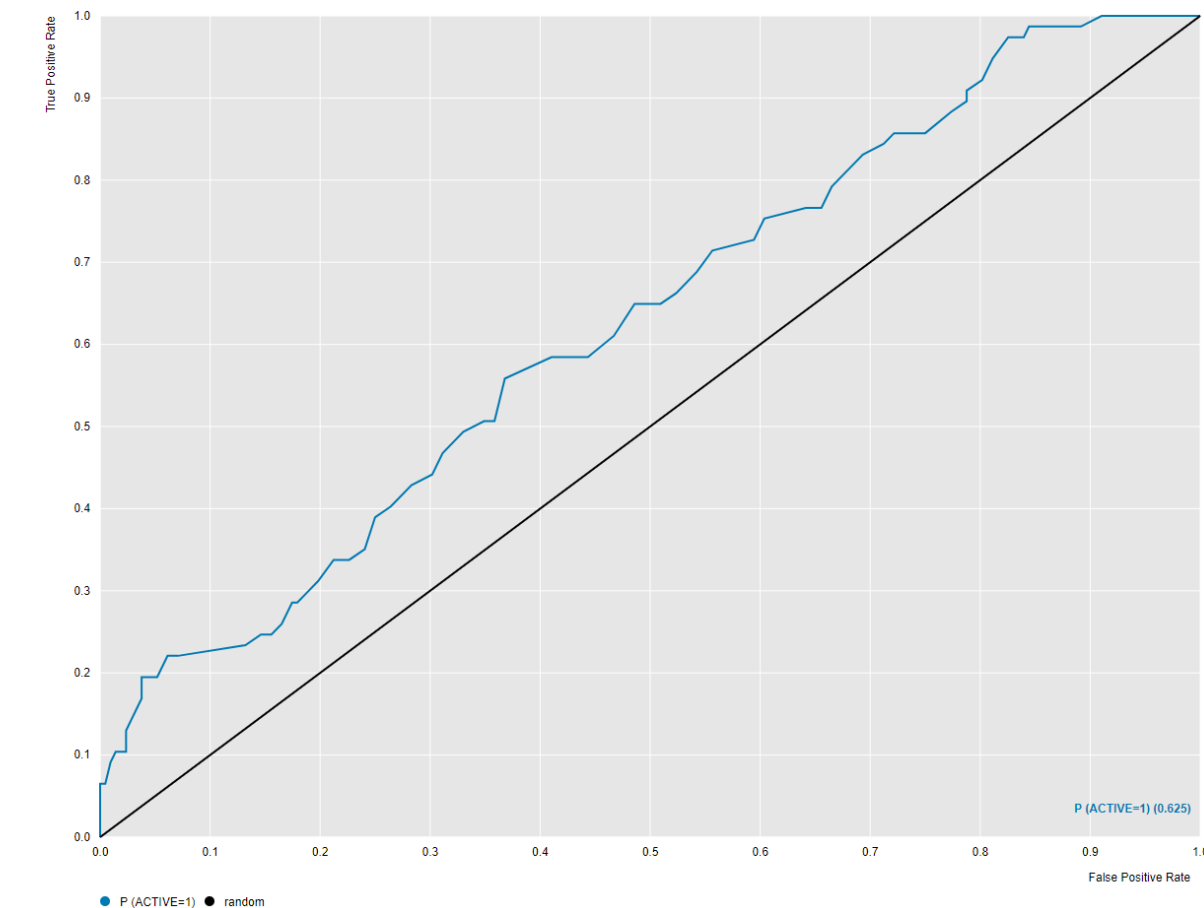

N=289

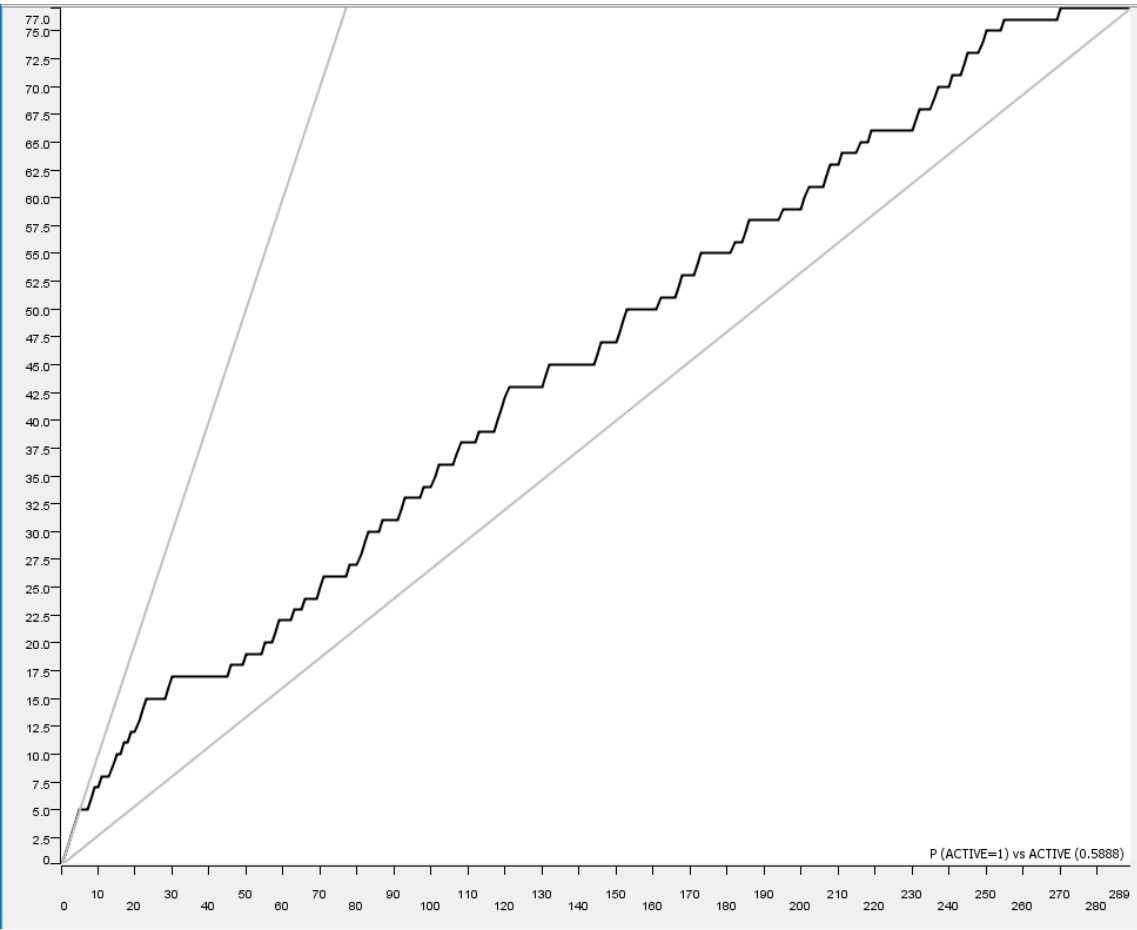

|                   |          |
|-------------------|----------|
| Top 10% Mean IC50 | 3,800 nM |
|-------------------|----------|

|          | Predicted Active | Predicted Inactive |
|----------|------------------|--------------------|
| Active   | 38               | 39                 |
| Inactive | 70               | 142                |

RF - <15 nM DefGood in c-Abl, 10% error;  
Random Seed = 429

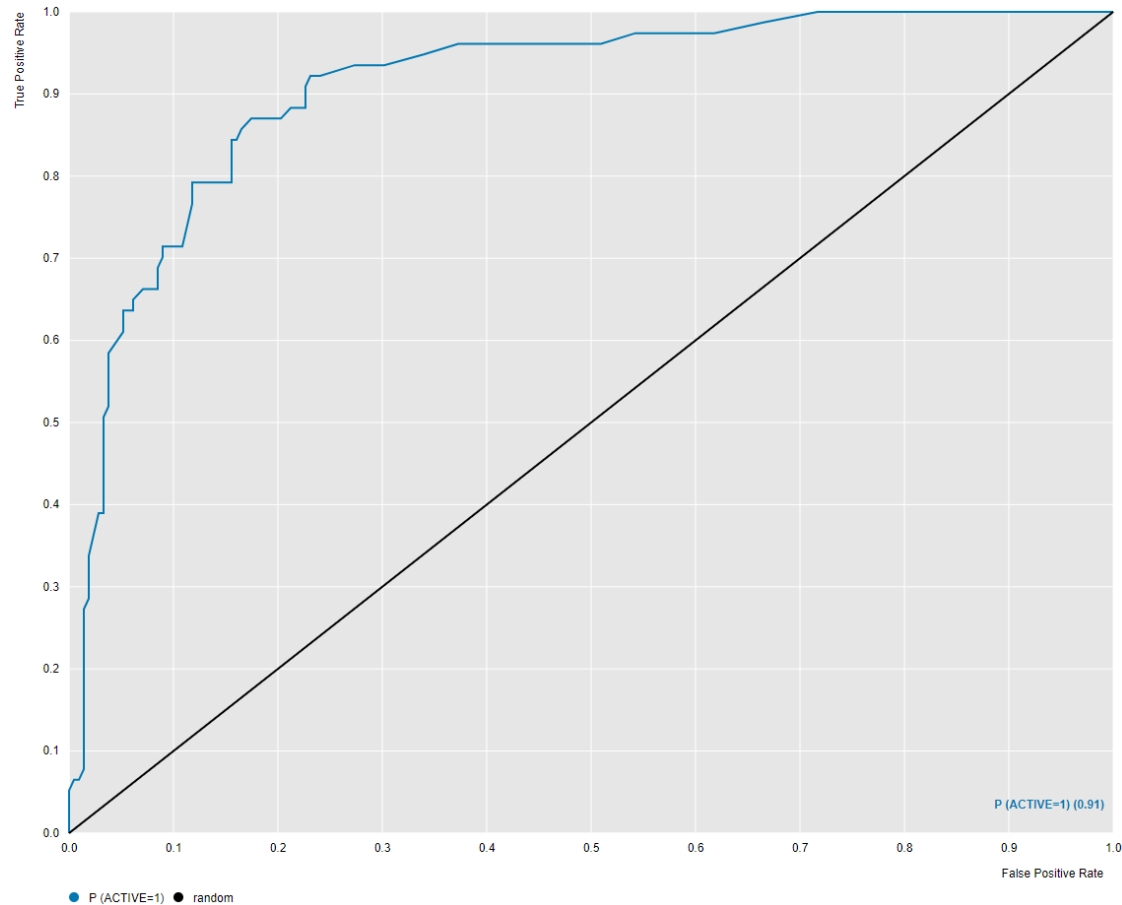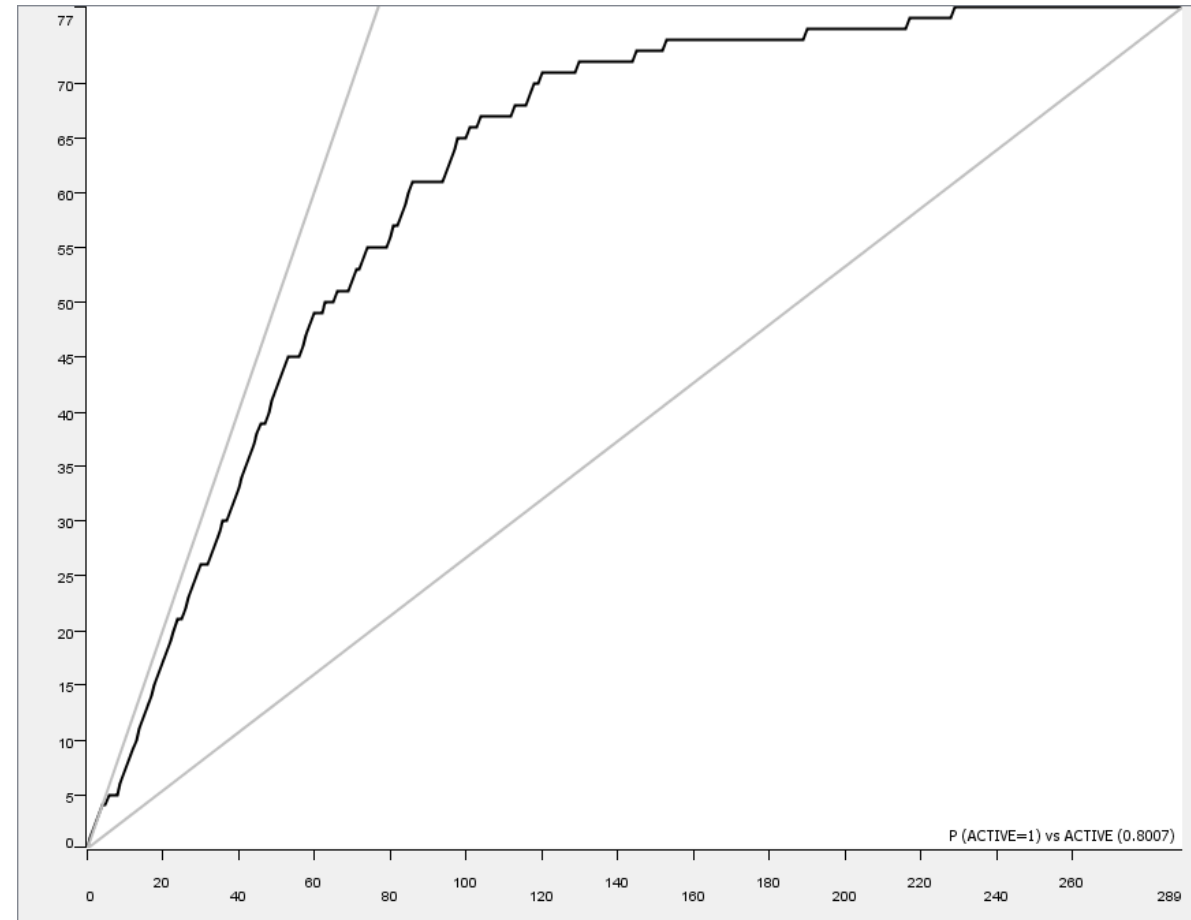

N=289

|                      |                                     |
|----------------------|-------------------------------------|
| Top 10% Mean<br>IC50 | 39.6 nM<br>(one 800 nM<br>compound) |
|----------------------|-------------------------------------|

|          | Predicted Active | Predicted Inactive |
|----------|------------------|--------------------|
| Active   | 52               | 25                 |
| Inactive | 18               | 194                |

# RF - <15 nM DefGood in c-Abl, 20% error; Random Seed = 429

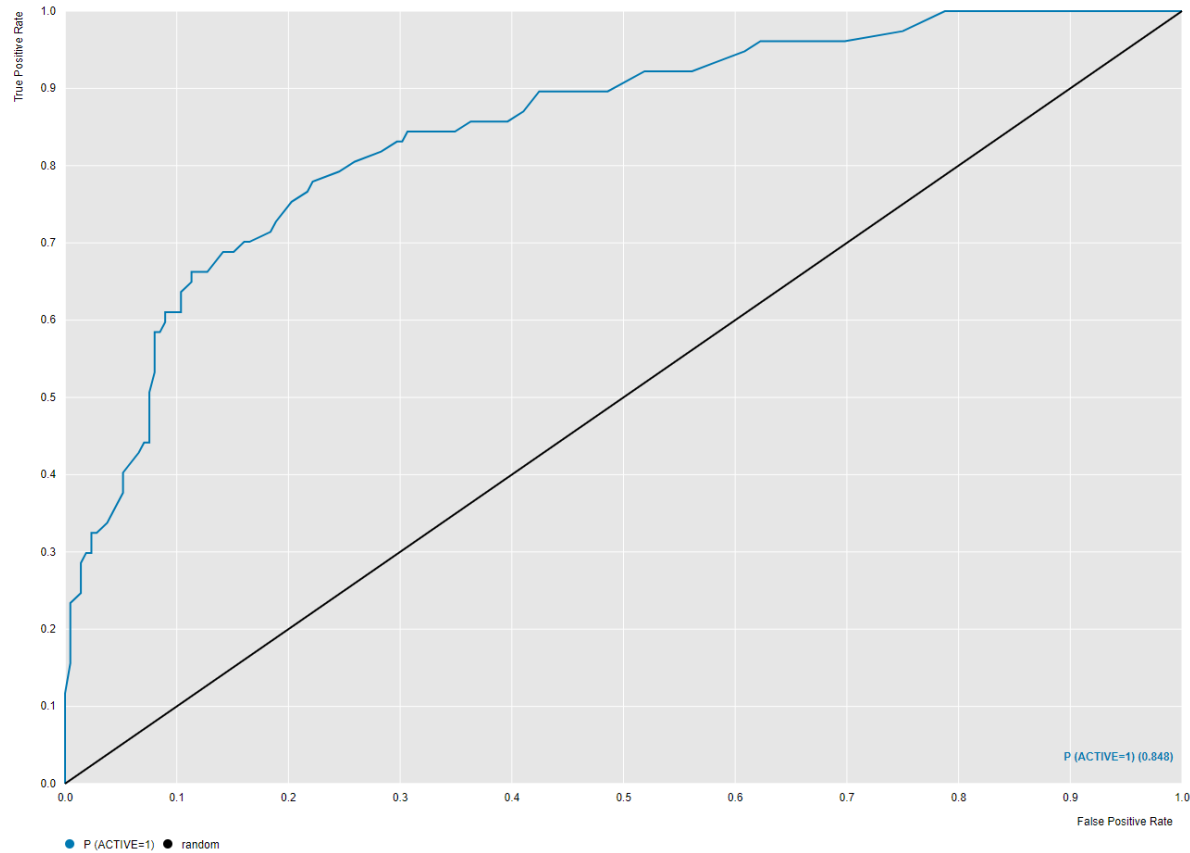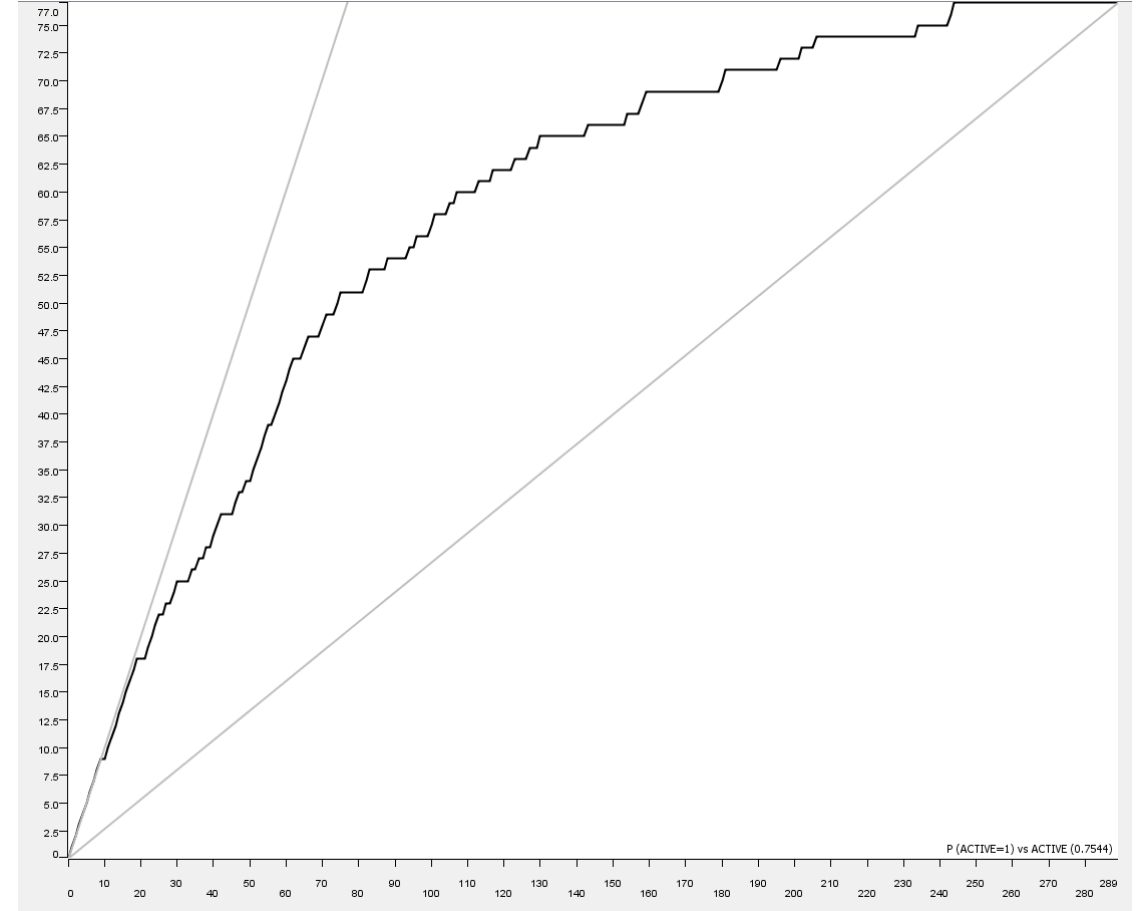

N=289

| Top 10% Mean<br>IC50 | 11.5 nM |
|----------------------|---------|
|----------------------|---------|

|          | Predicted Active | Predicted Inactive |
|----------|------------------|--------------------|
| Active   | 51               | 26                 |
| Inactive | 24               | 188                |

RF - <15 nM DefGood in c-Abl, 25% error;  
Random Seed = 429

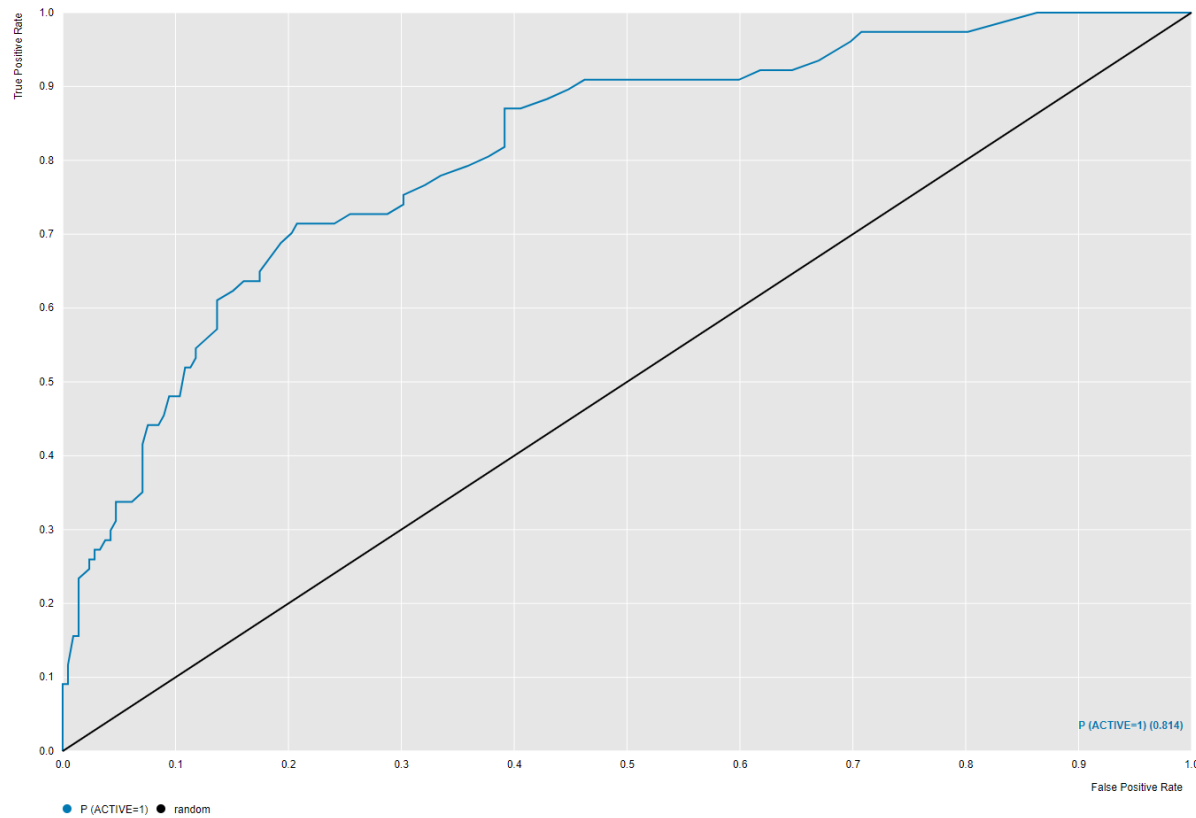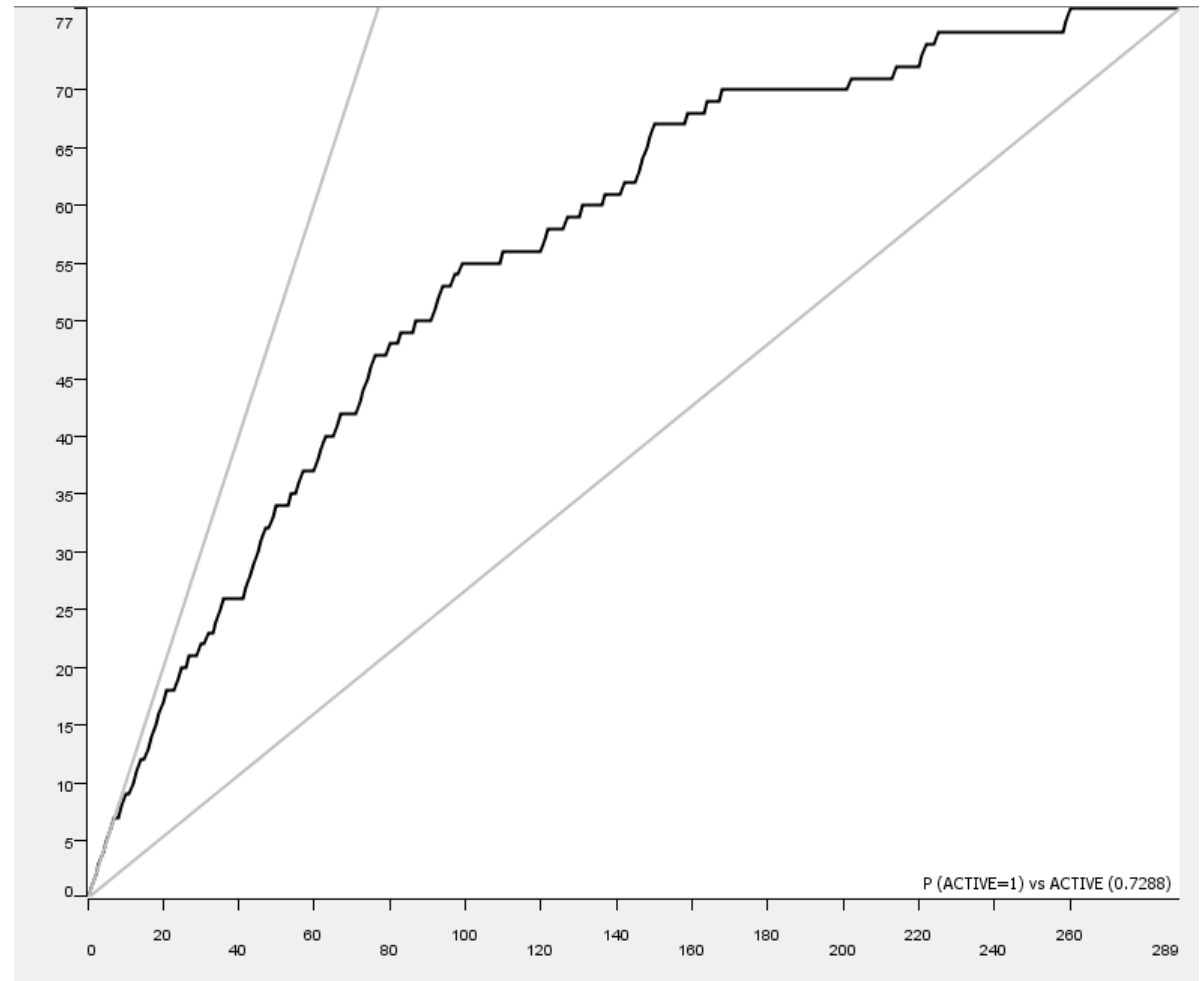

N=289

|                      |                                         |
|----------------------|-----------------------------------------|
| Top 10% Mean<br>IC50 | 2,400 nM<br>(one 65 $\mu$ M<br>mistake) |
|----------------------|-----------------------------------------|

|          | Predicted Active | Predicted Inactive |
|----------|------------------|--------------------|
| Active   | 47               | 30                 |
| Inactive | 29               | 183                |



# RF - <15 nM DefGood in c-Abl, 30% error; Random Seed = 429

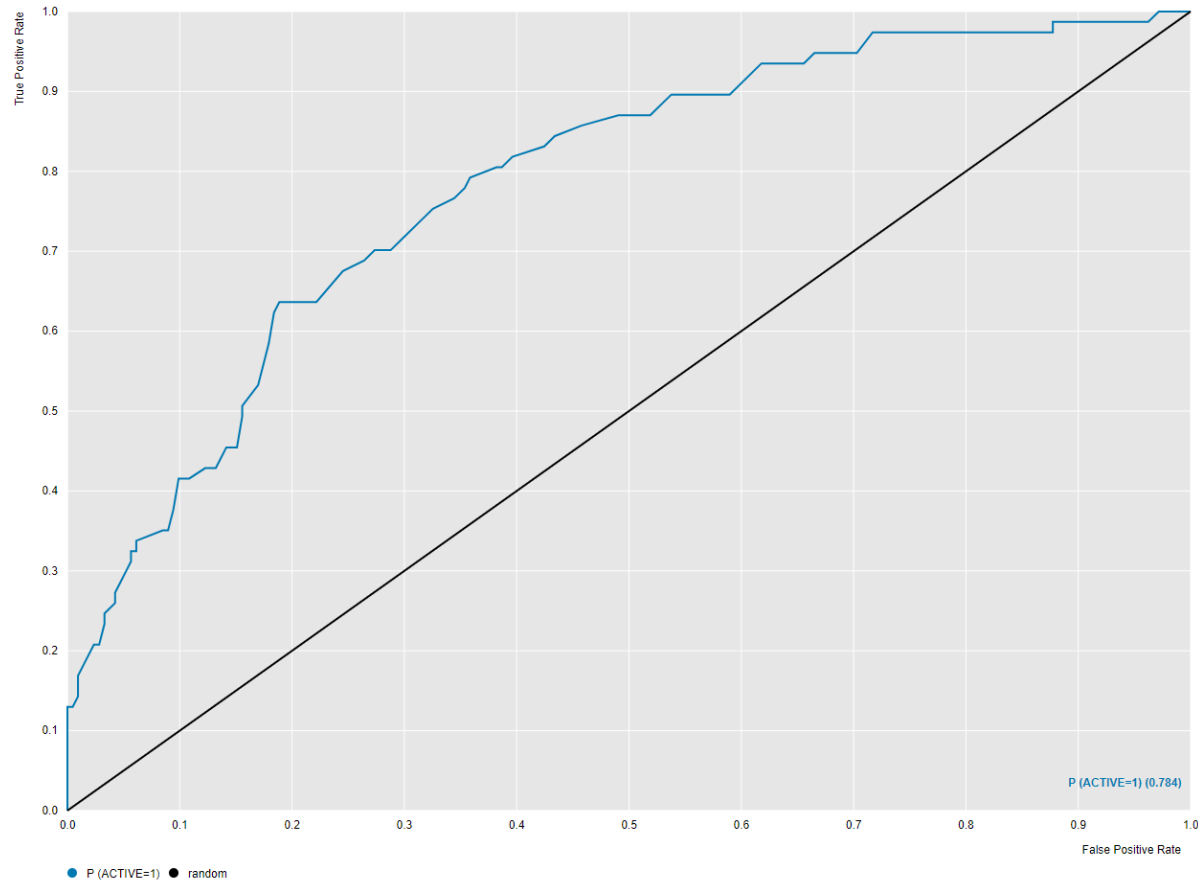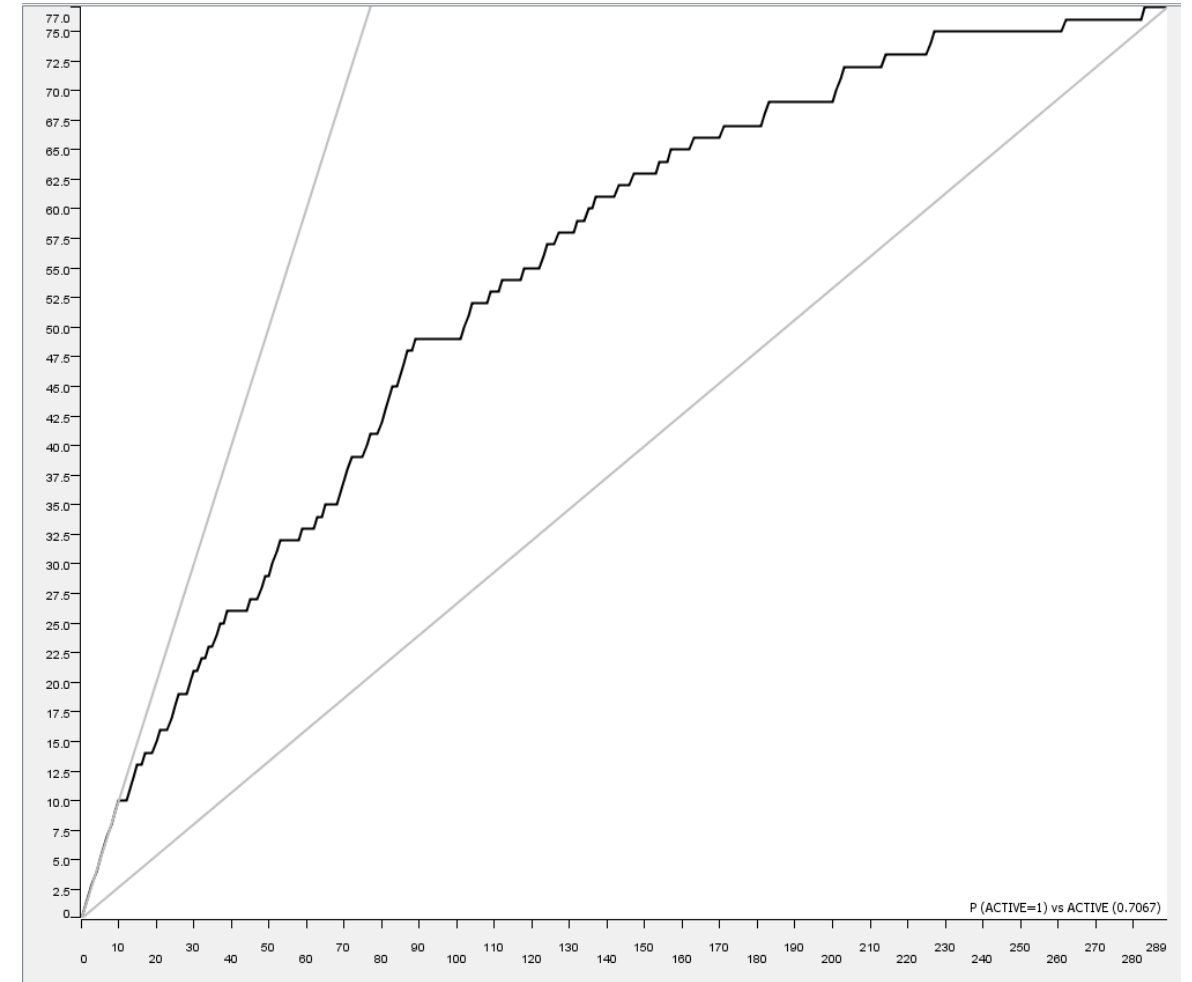

N=289

| Top 10% Mean<br>IC50 | 2,500 nM |
|----------------------|----------|
|----------------------|----------|

|          | Predicted Active | Predicted Inactive |
|----------|------------------|--------------------|
| Active   | 48               | 29                 |
| Inactive | 39               | 173                |

RF - <15 nM DefGood in c-Abl, 10% error;  
Random Seed = 121783

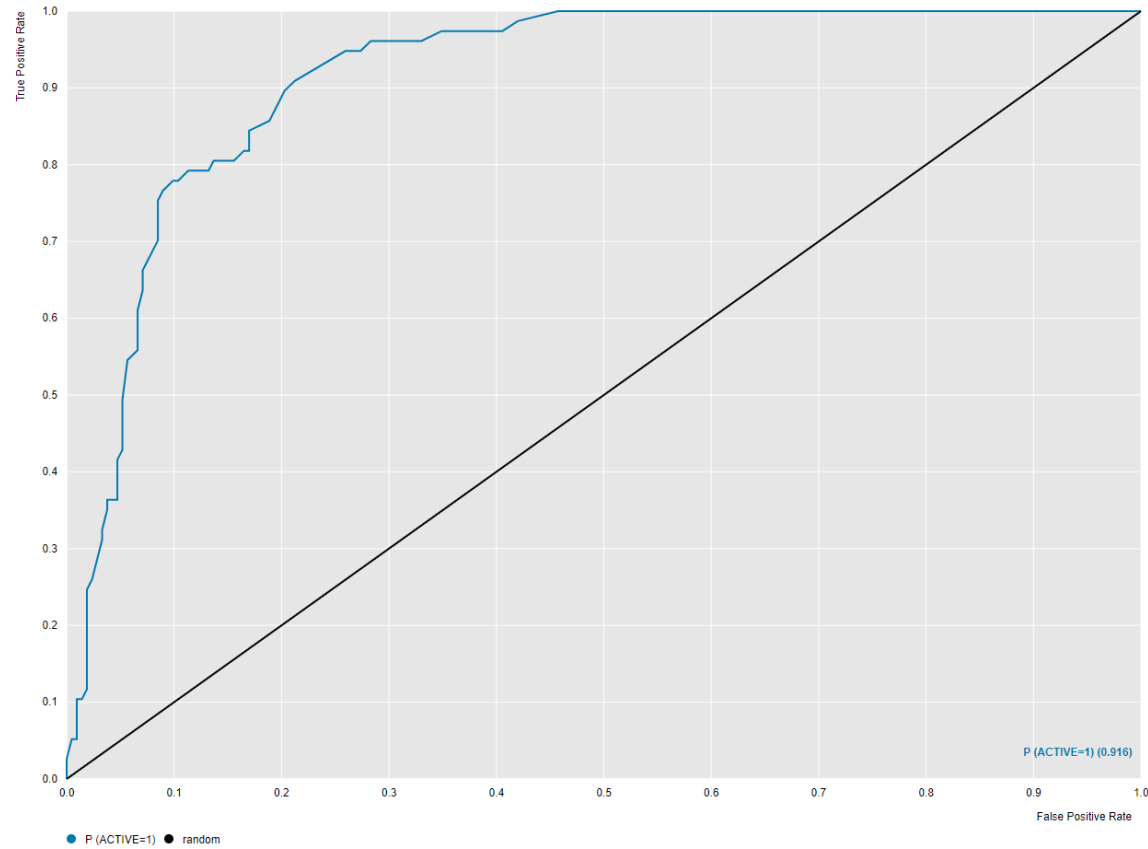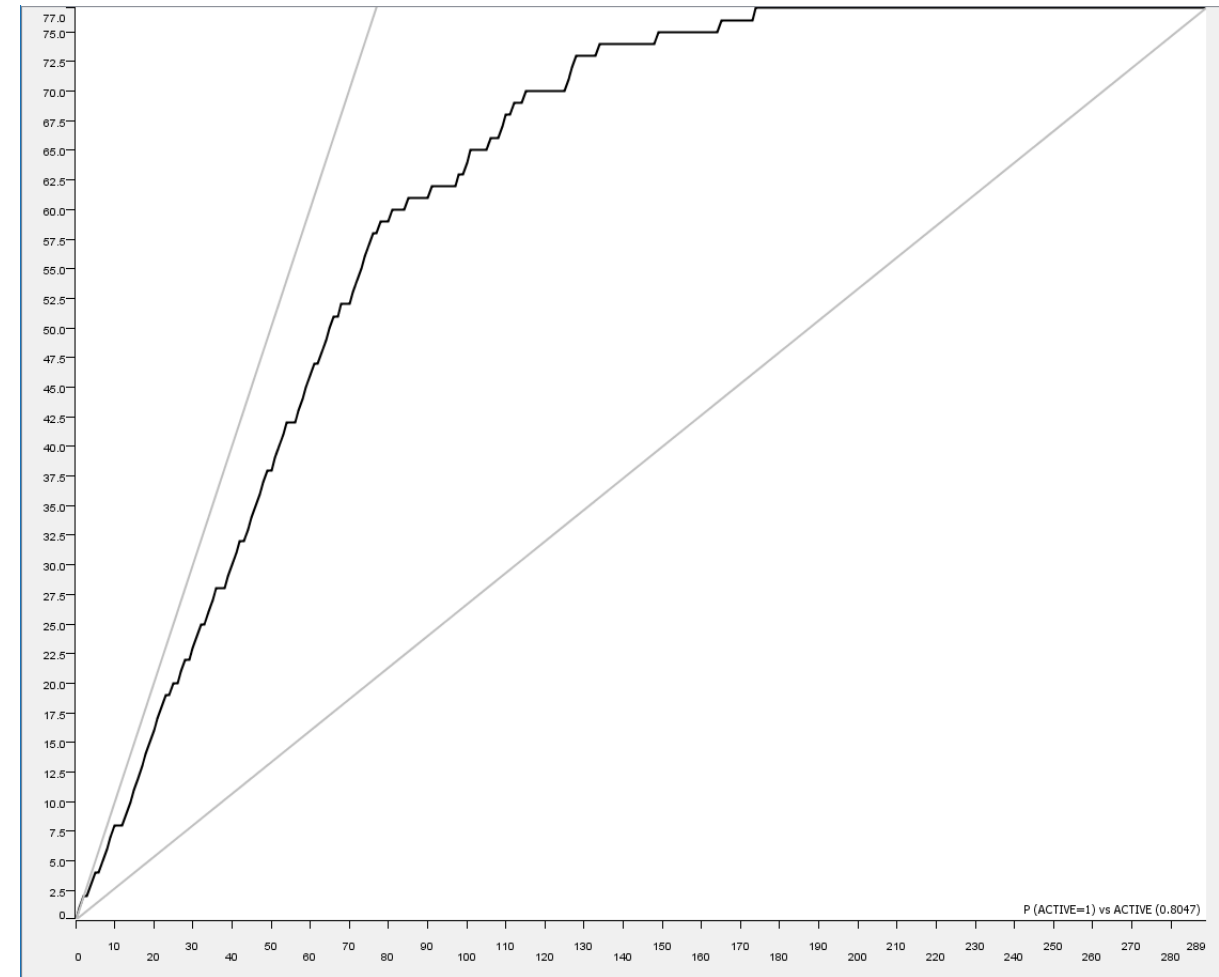

N=289

|                      |                                     |
|----------------------|-------------------------------------|
| Top 10% Mean<br>IC50 | 117 nM<br>(3 > 800 nM<br>compounds) |
|----------------------|-------------------------------------|

|          | Predicted Active | Predicted Inactive |
|----------|------------------|--------------------|
| Active   | 52               | 25                 |
| Inactive | 16               | 196                |

RF - <15 nM DefGood in c-Abl, 20% error;  
Random Seed = 121783

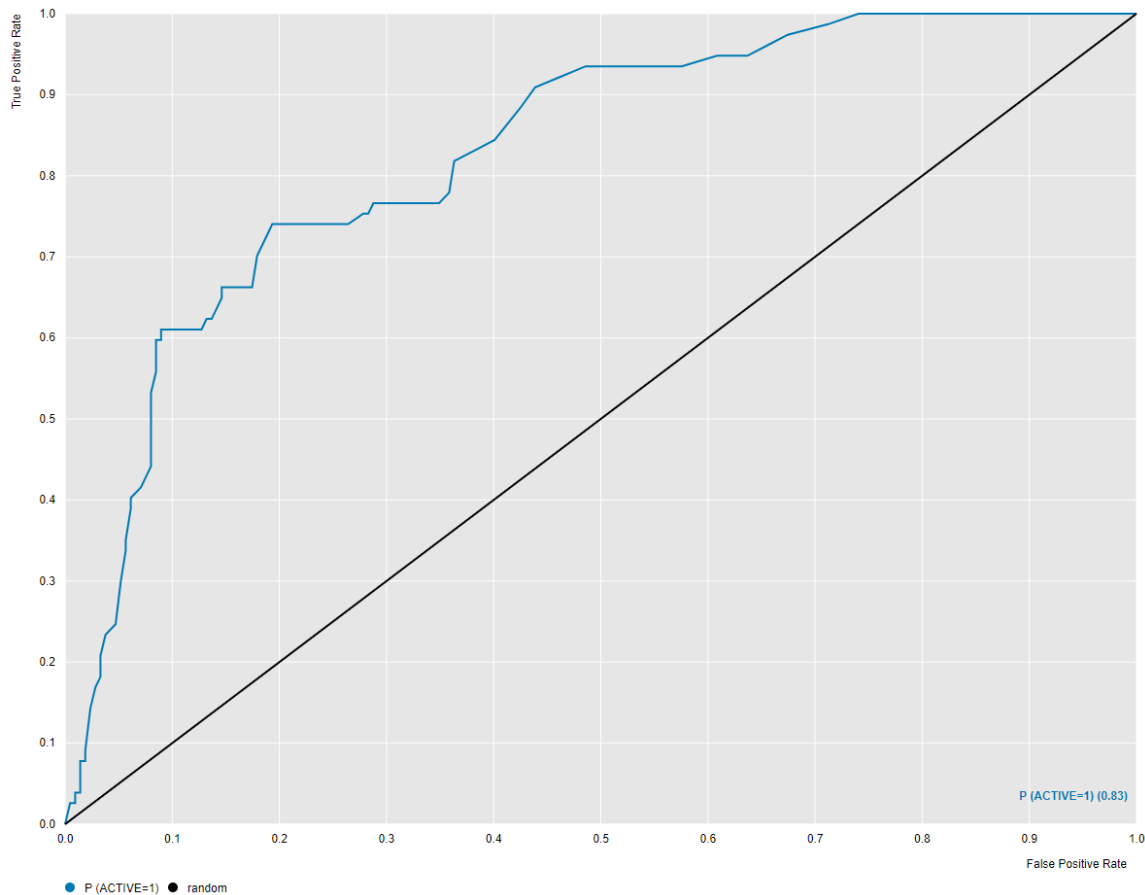

N=289

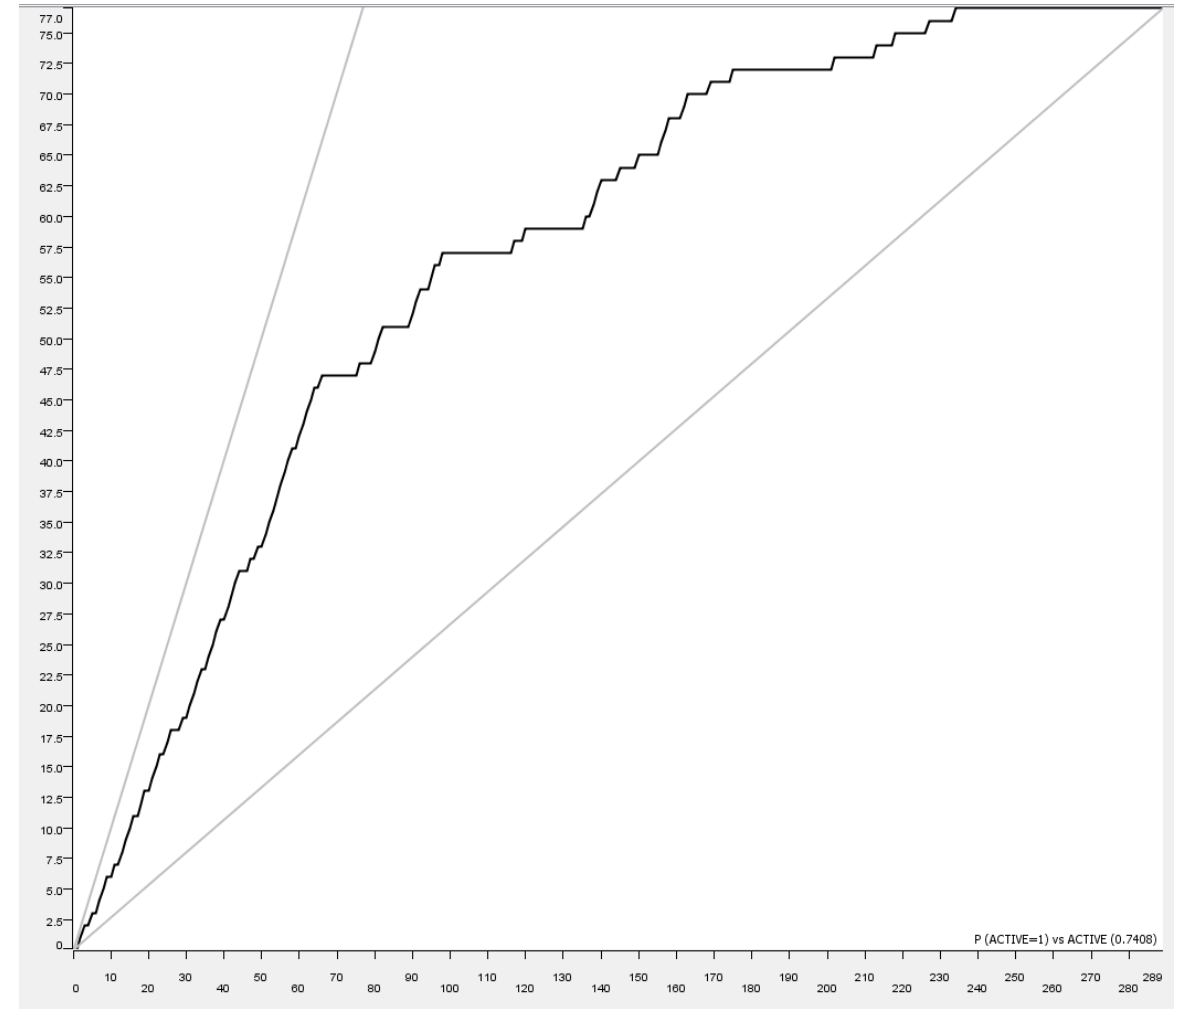

Top 10% Mean IC50

137 nM  
(3 > 800 nM  
compounds)

|          | Predicted Active | Predicted Inactive |
|----------|------------------|--------------------|
| Active   | 47               | 30                 |
| Inactive | 27               | 185                |

RF - <15 nM DefGood in c-Abl, 30% error;  
Random Seed = 121783

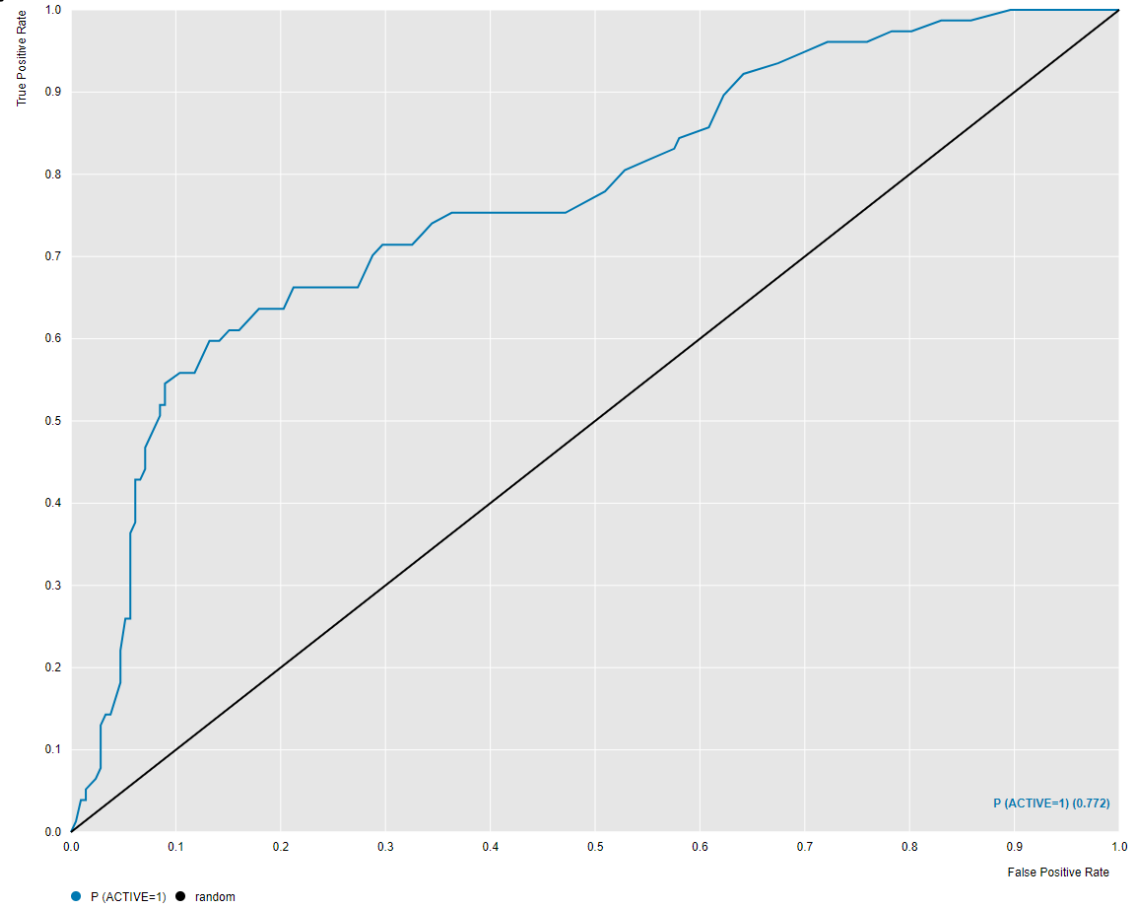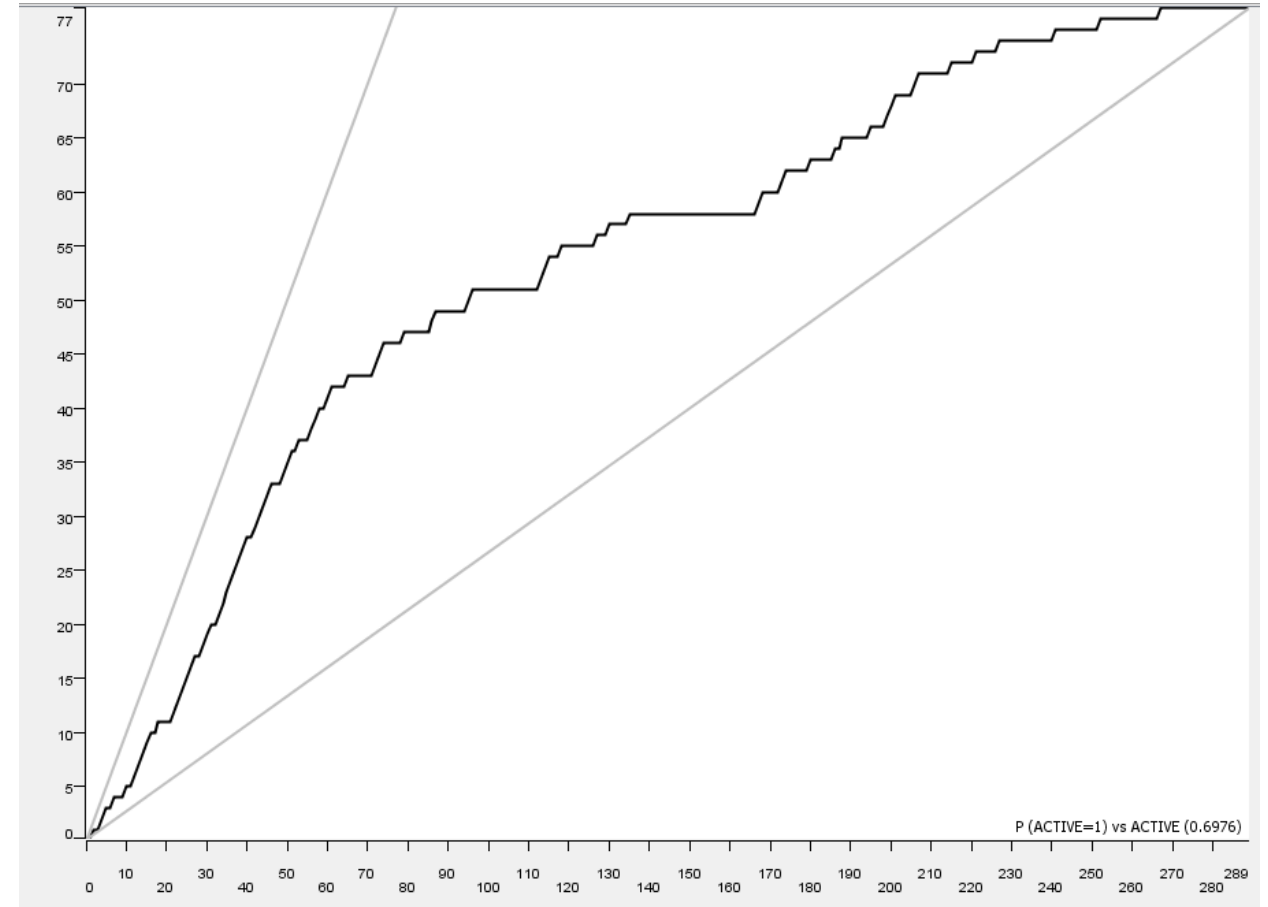

N=289

Top 10% Mean IC50

138 nM  
(3 > 800 nM  
compounds)

|          | Predicted Active | Predicted Inactive |
|----------|------------------|--------------------|
| Active   | 46               | 31                 |
| Inactive | 30               | 182                |

RF - <15 nM DefGood in c-Abl, 35% error;  
Random Seed = 121783

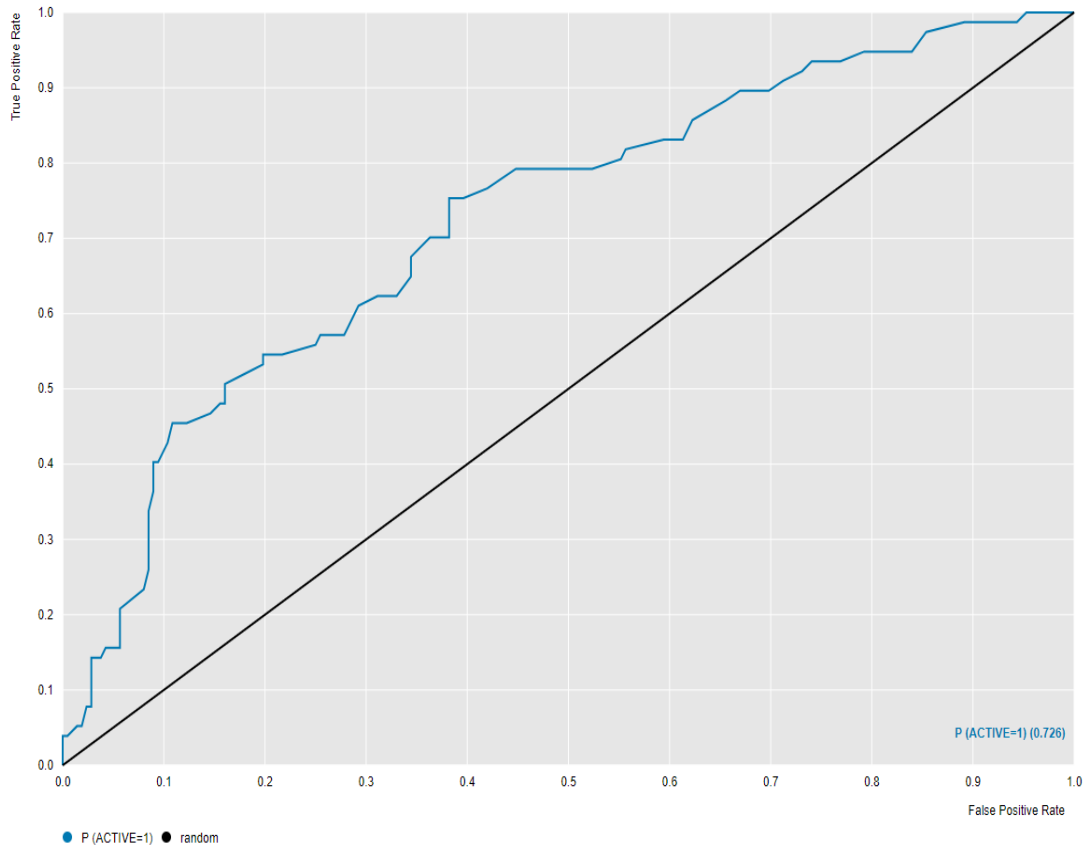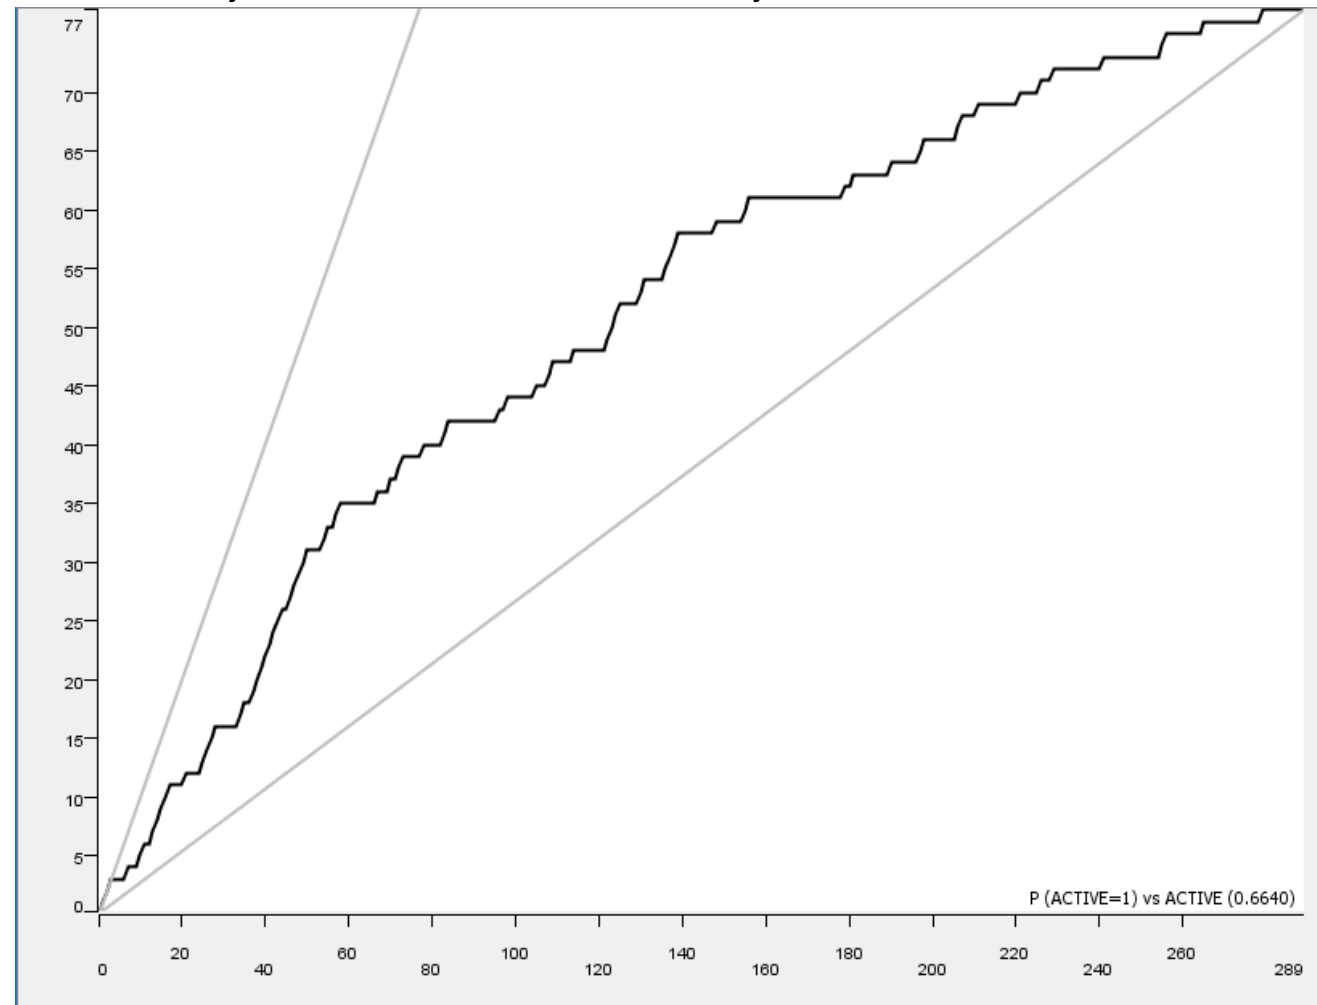

N=289

Top 10% Mean IC50

1,100 nM

|          | Predicted Active | Predicted Inactive |
|----------|------------------|--------------------|
| Active   | 42               | 35                 |
| Inactive | 46               | 166                |

# Conclusion - RF

- Across three random seeds, the % error that lead to a significant enrichment failure and top 10% IC50 increase in the retrospective test was 35%, 25% and 35% for each unique random seed.
- An RF can be very tolerant of data error in the c-Abl space, but it is less tolerant than an NBN.

PNN - <15 nM DefGood in c-Abl, 5% error ;  
Random seed = 1515533876005

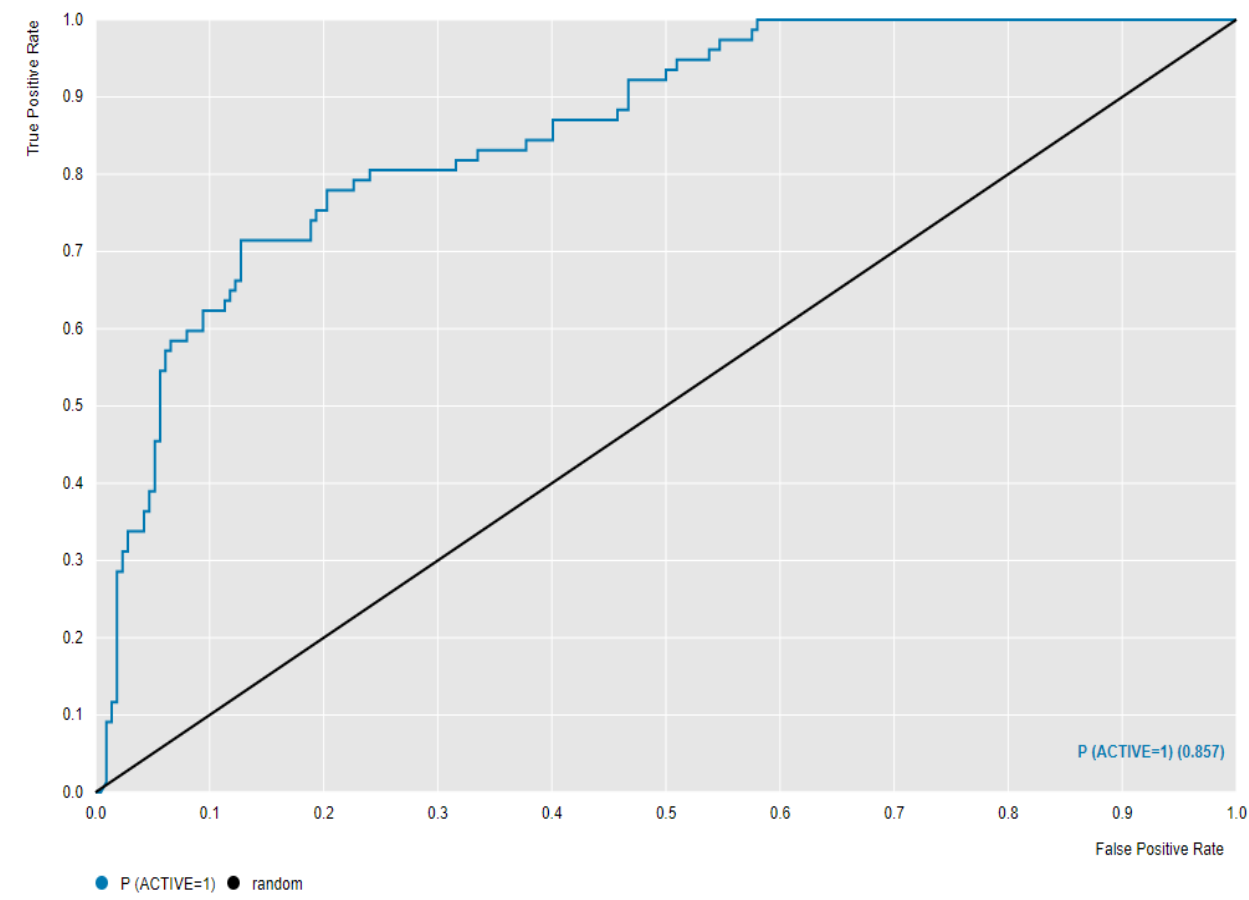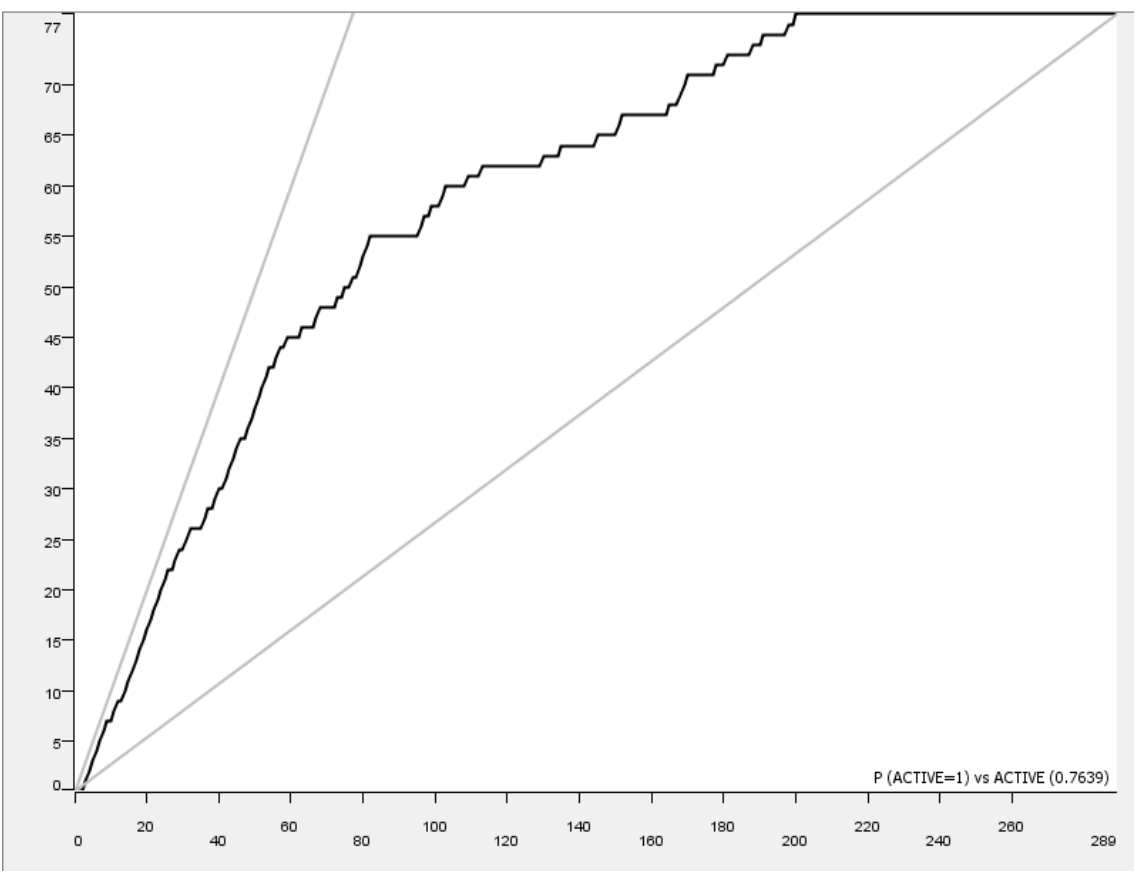

IN-203

|                   |                                                         |
|-------------------|---------------------------------------------------------|
| Top 10% Mean IC50 | 390 nM<br>(one >10,000 nM<br>compound, ranked<br>first) |
|-------------------|---------------------------------------------------------|

|          | Predicted Active | Predicted Inactive |
|----------|------------------|--------------------|
| Active   | 40               | 37                 |
| Inactive | 12               | 200                |

# PNN - <15 nM DefGood in c-Abl, 10% error

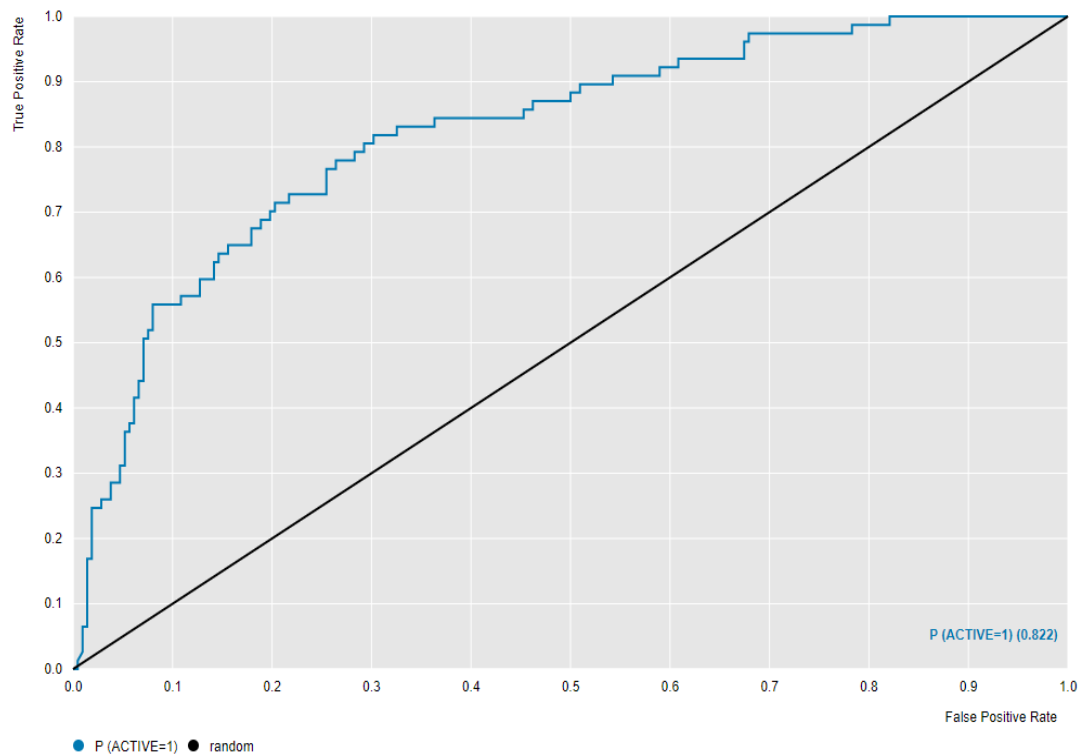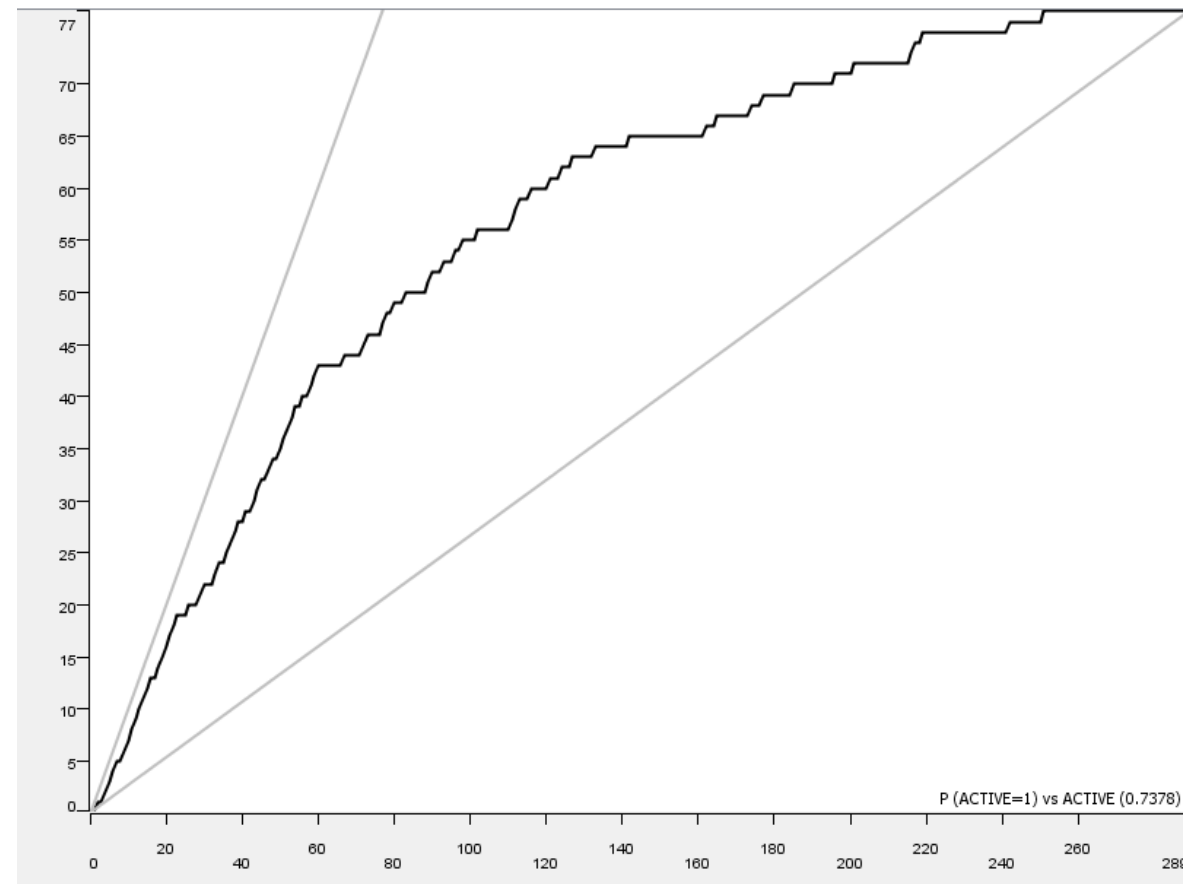

N=289

Top 10% Mean  
IC50

470 nM  
(one >10,000 nM  
compound,  
ranked first)

|          | Predicted Active | Predicted Inactive |
|----------|------------------|--------------------|
| Active   | 33               | 44                 |
| Inactive | 14               | 198                |



# PNN - <15 nM DefGood in c-Abl, 15% error

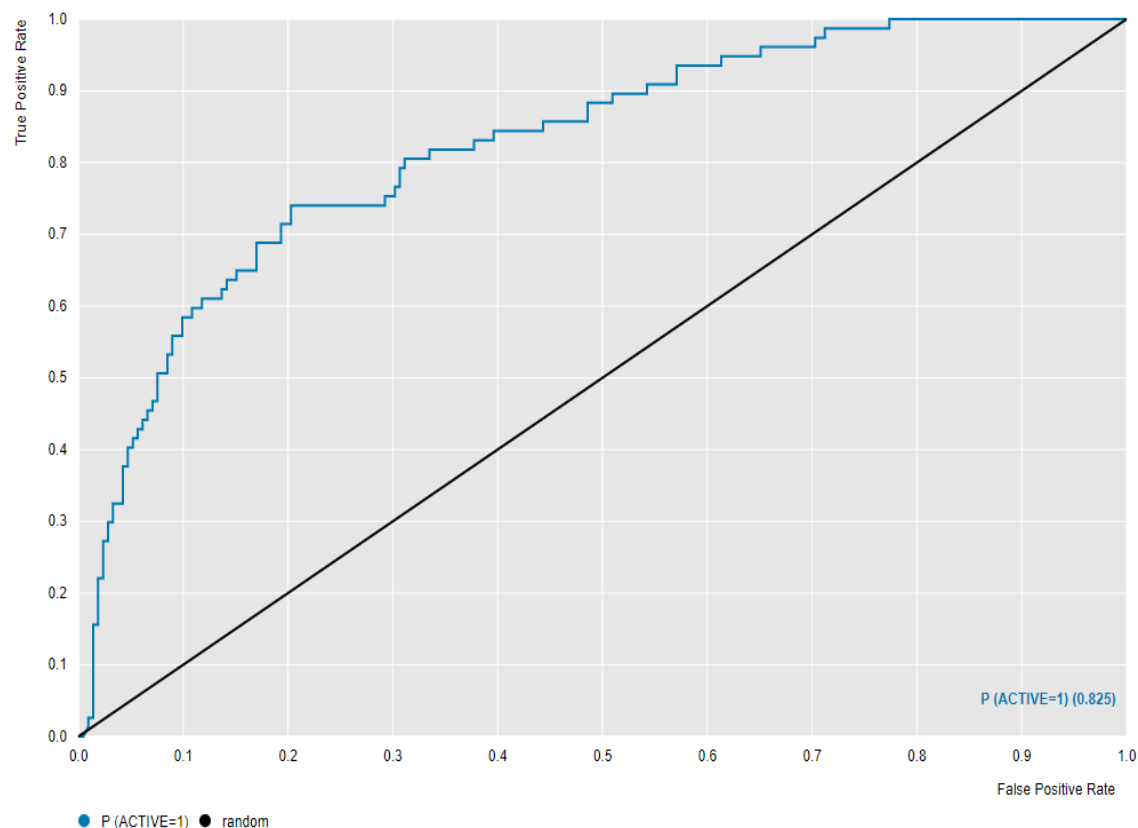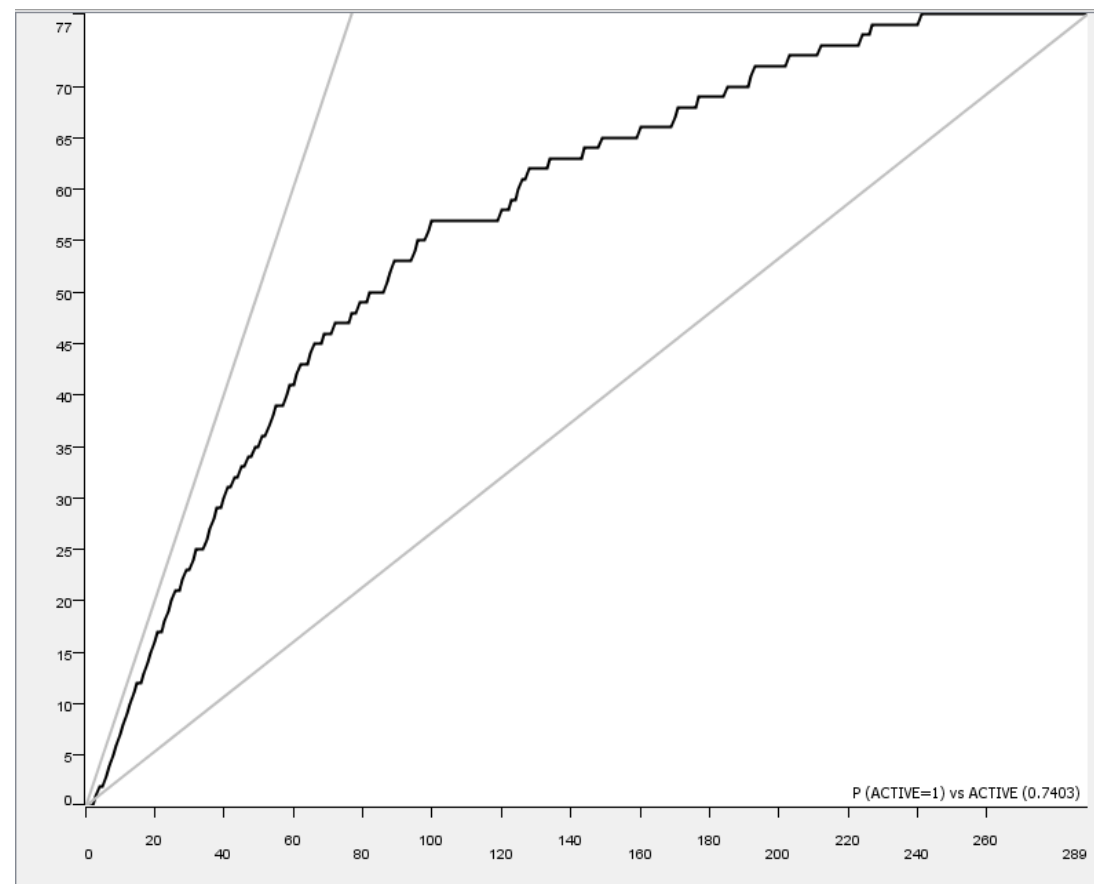

N=289

Top 10% Mean  
IC50

400 nM  
(one >10,000 nM  
compound,  
ranked first)

|          | Predicted Active | Predicted Inactive |
|----------|------------------|--------------------|
| Active   | 45               | 32                 |
| Inactive | 23               | 189                |

# PNN - <15 nM DefGood in c-Abl, 20% error

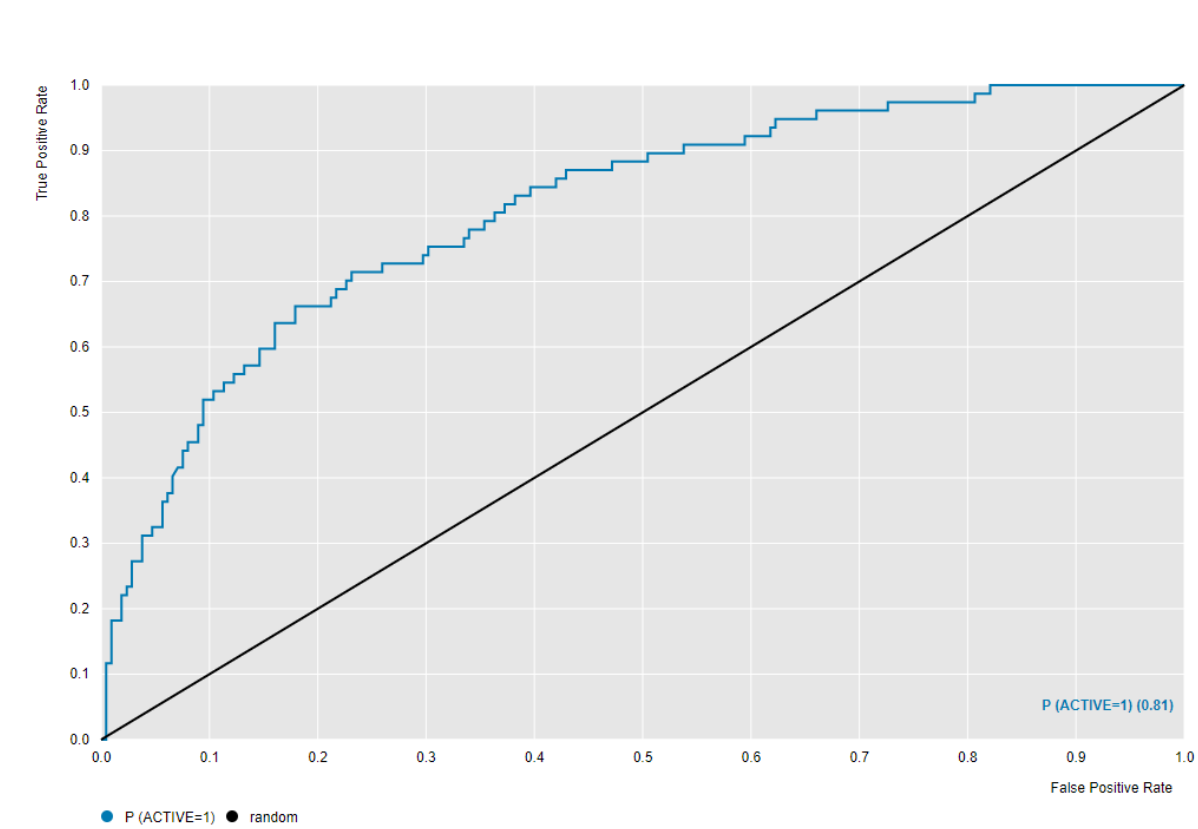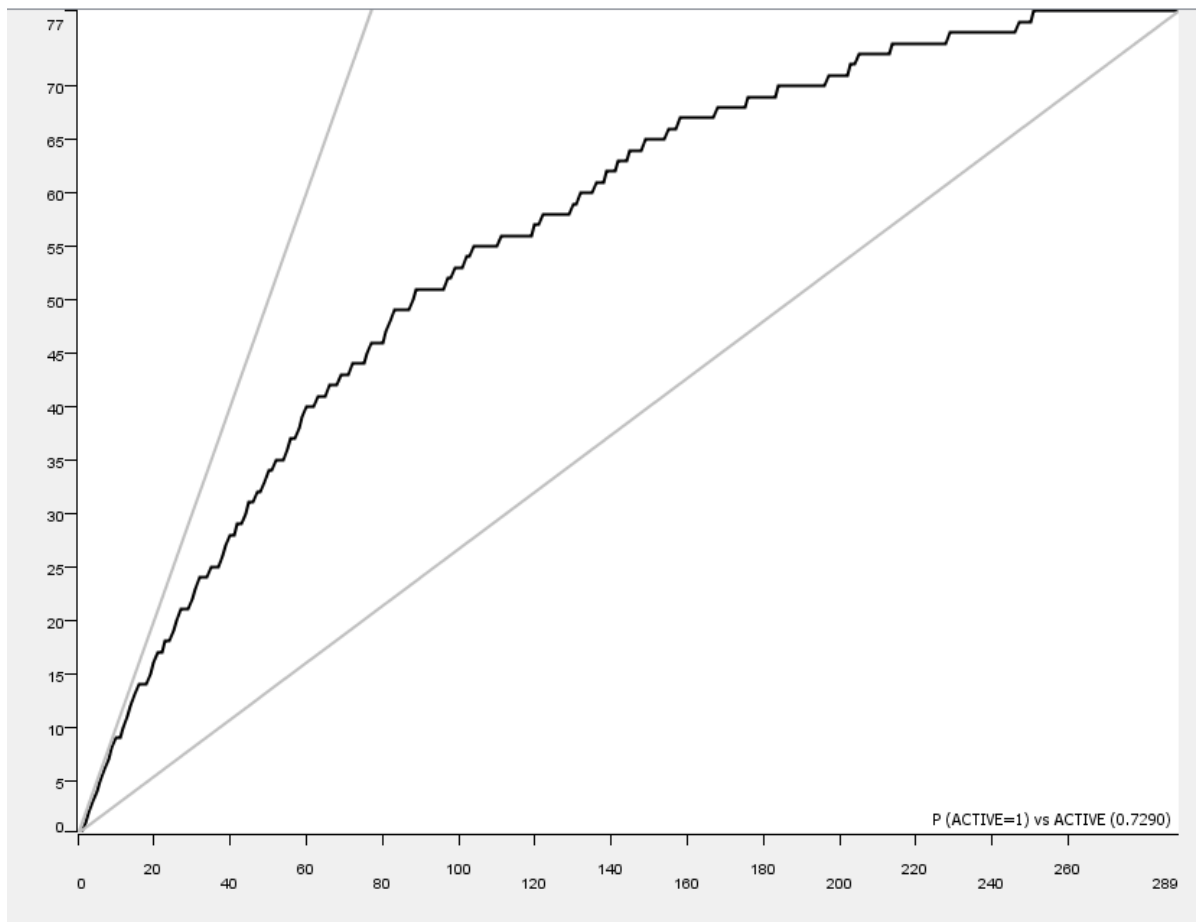

N=289

|                   |                                               |
|-------------------|-----------------------------------------------|
| Top 10% Mean IC50 | 565 nM(one >10,000 nM compound, ranked first) |
|-------------------|-----------------------------------------------|

|          | Predicted Active | Predicted Inactive |
|----------|------------------|--------------------|
| Active   | 42               | 35                 |
| Inactive | 26               | 186                |

# PNN - <15 nM DefGood in c-Abl, 25% error

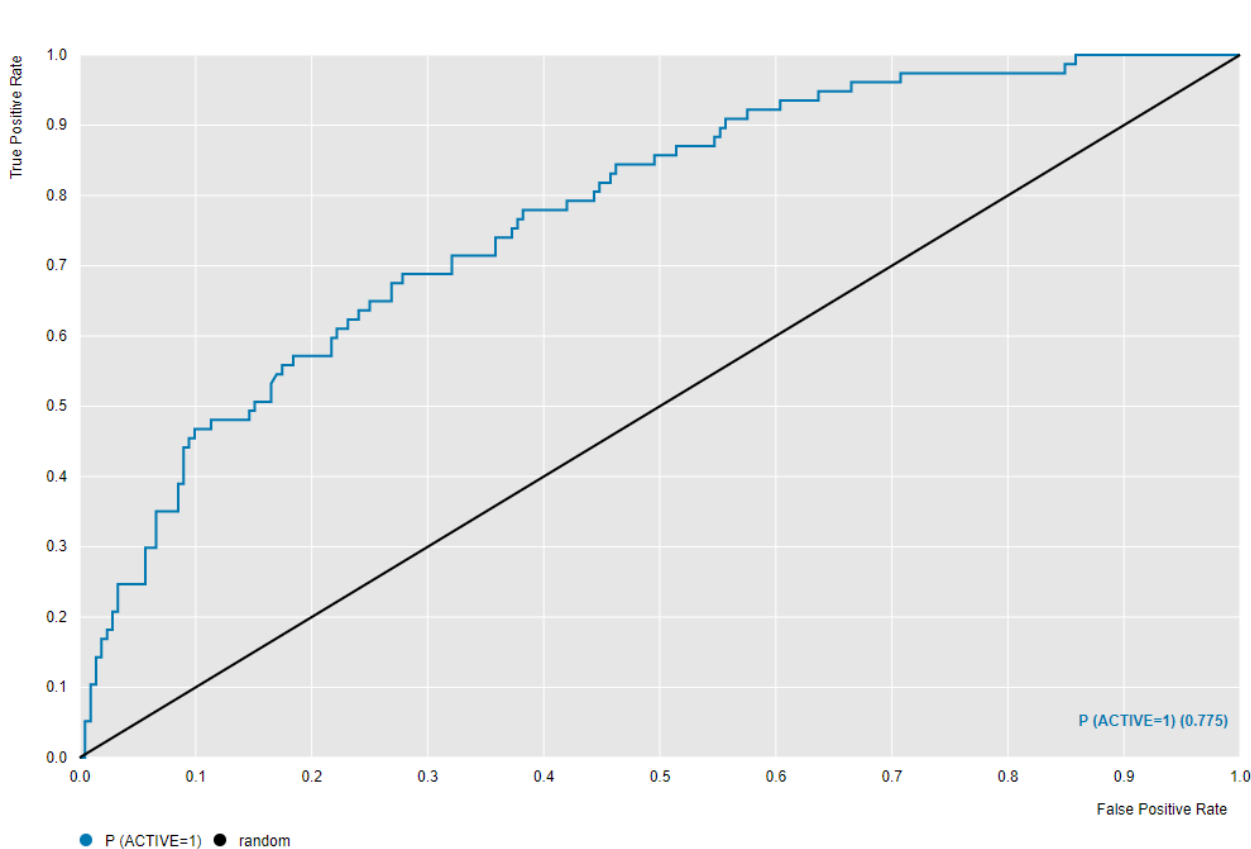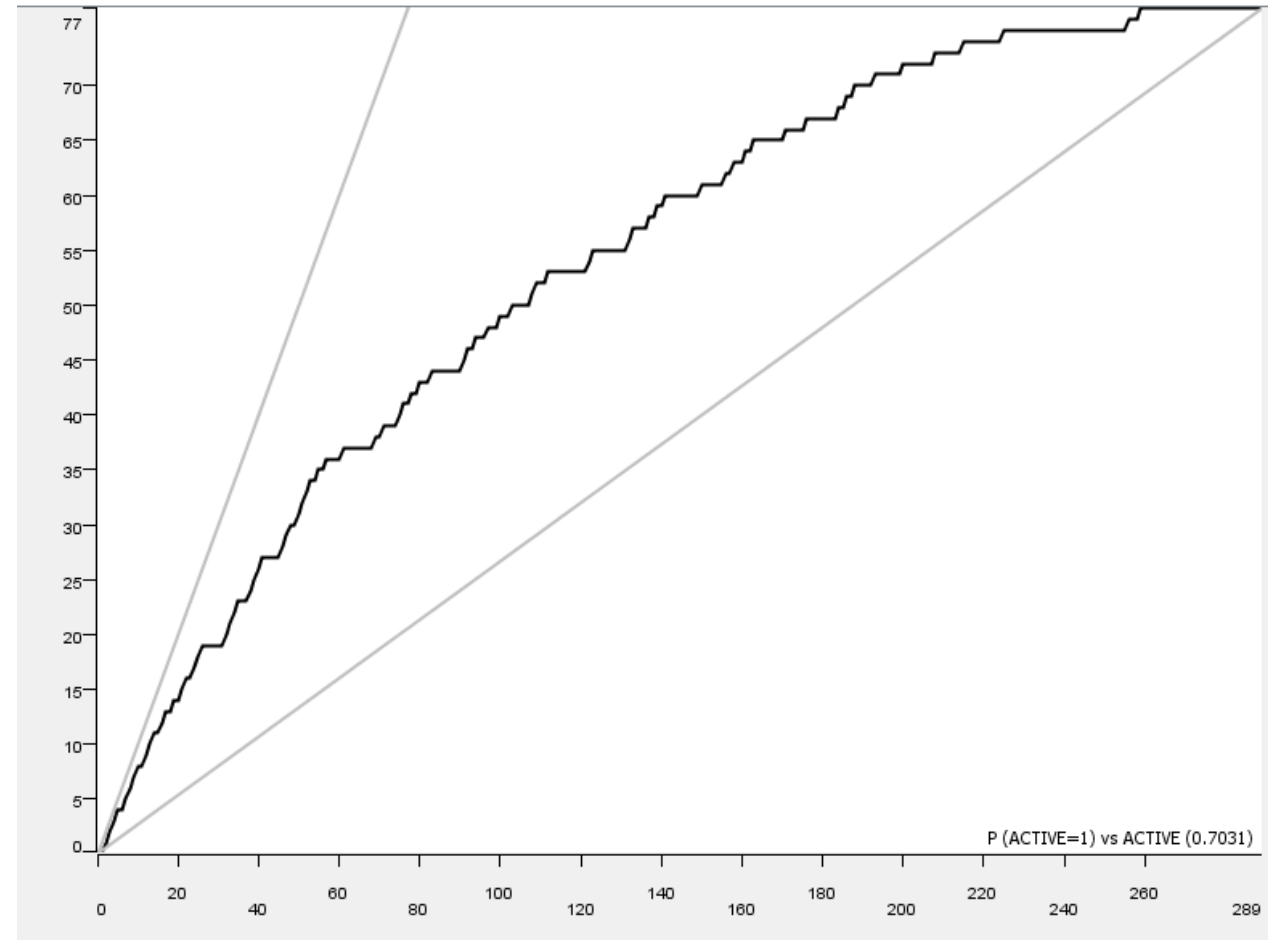

N=289

Top 10% Mean IC50

560 nM(one >10,000  
nM compound, ranked  
first)

|          | Predicted Active | Predicted Inactive |
|----------|------------------|--------------------|
| Active   | 37               | 40                 |
| Inactive | 26               | 186                |

# PNN - <15 nM DefGood in c-Abl, 30% error

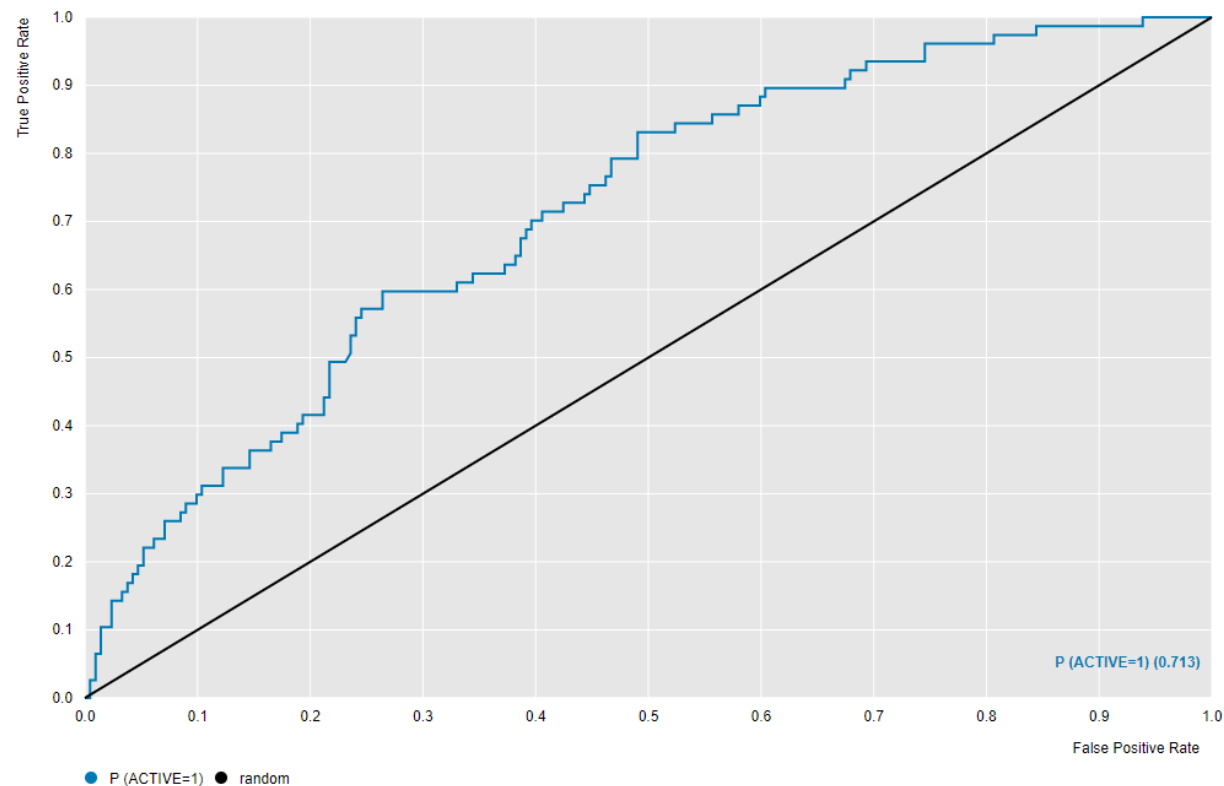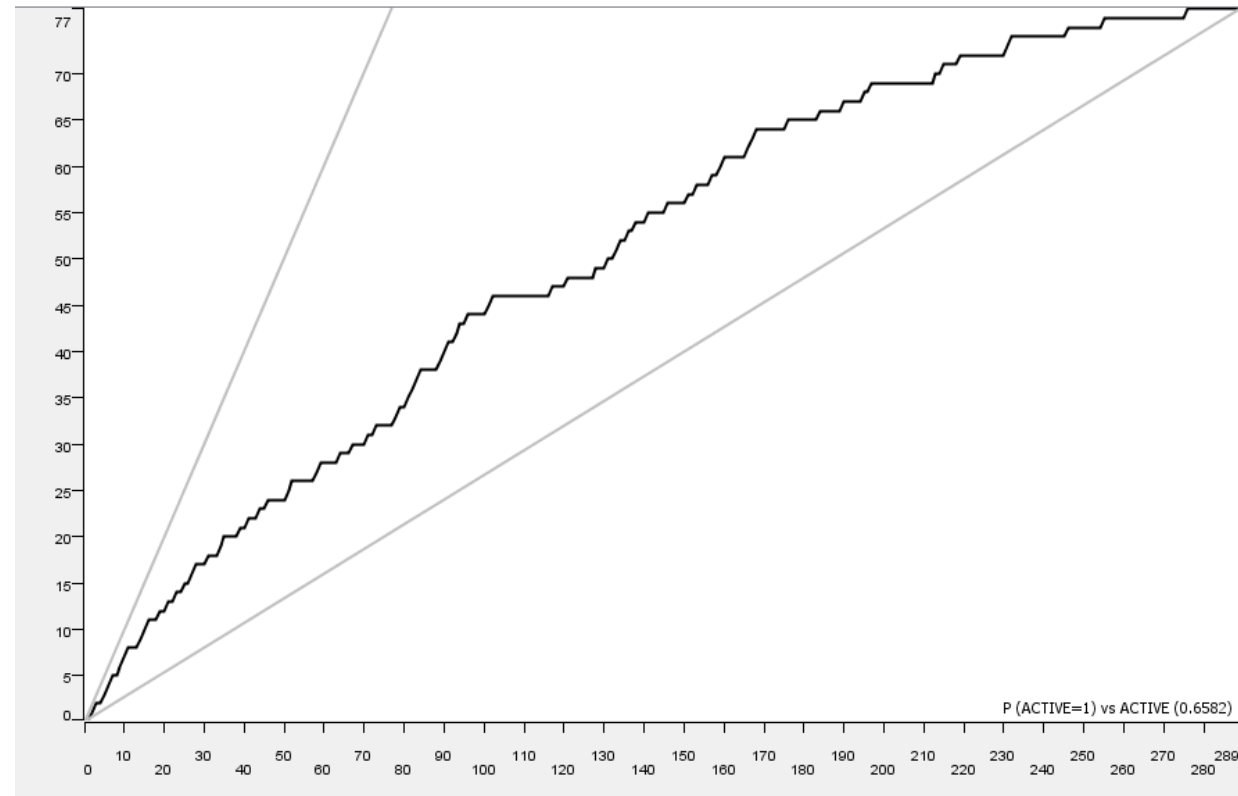

N=289

Top 10% Mean IC50

503 nM (one >10,000 nM compound, ranked first)

|          | Predicted Active | Predicted Inactive |
|----------|------------------|--------------------|
| Active   | 30               | 47                 |
| Inactive | 39               | 173                |

# PNN - <15 nM DefGood in c-Abl, 35% error

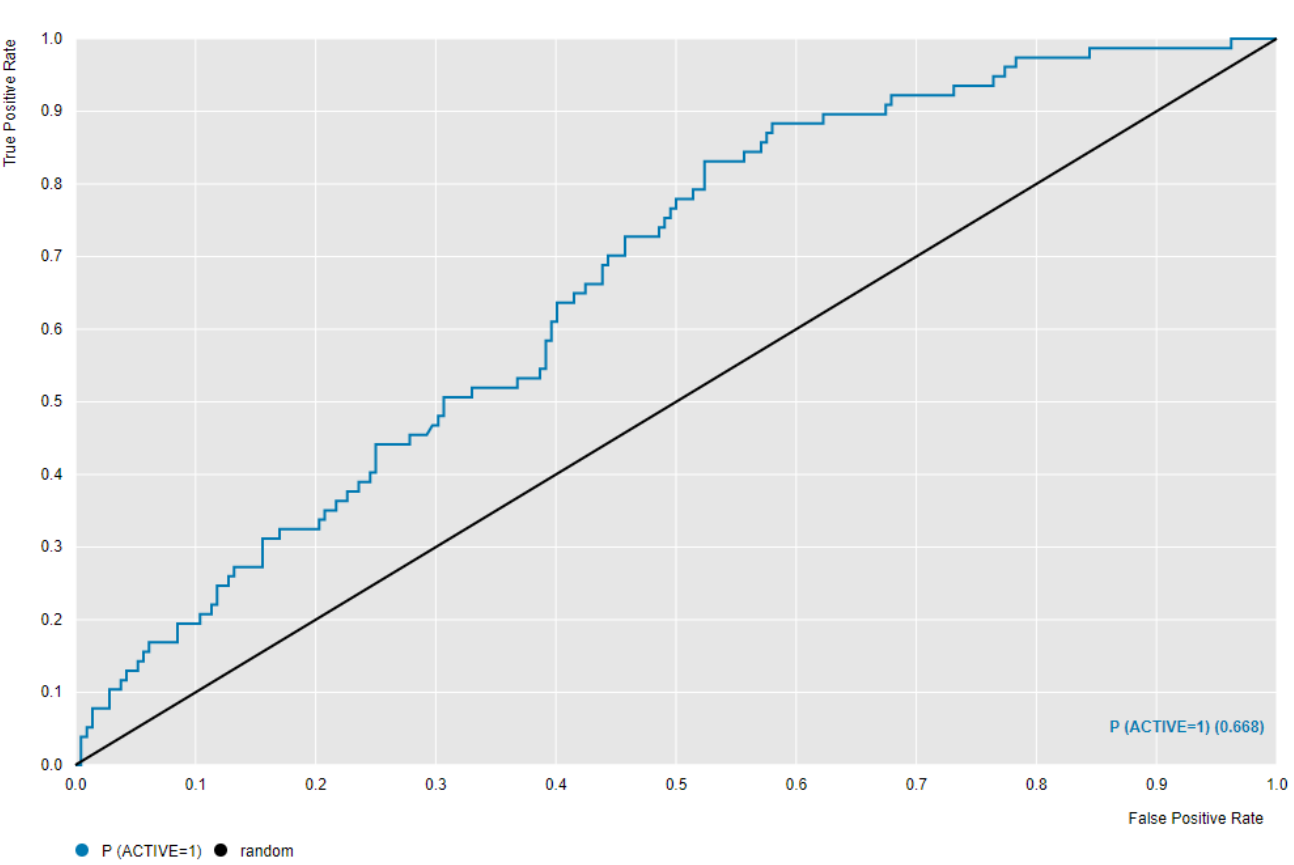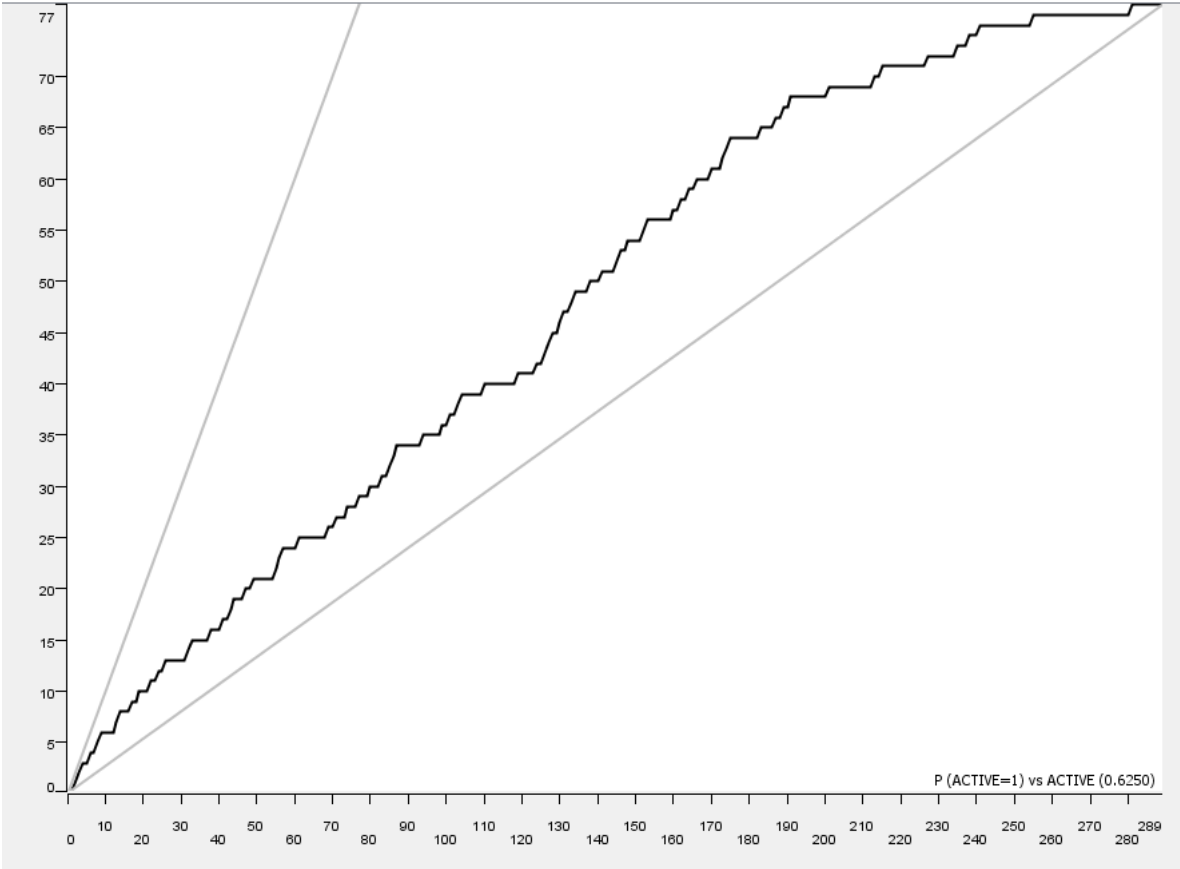

N=289

|                   |       |
|-------------------|-------|
| Top 10% Mean IC50 | 4,300 |
|-------------------|-------|

|          | Predicted Active | Predicted Inactive |
|----------|------------------|--------------------|
| Active   | 29               | 48                 |
| Inactive | 48               | 164                |

# PNN - <15 nM DefGood in c-Abl, 5% error; Random seed = 429

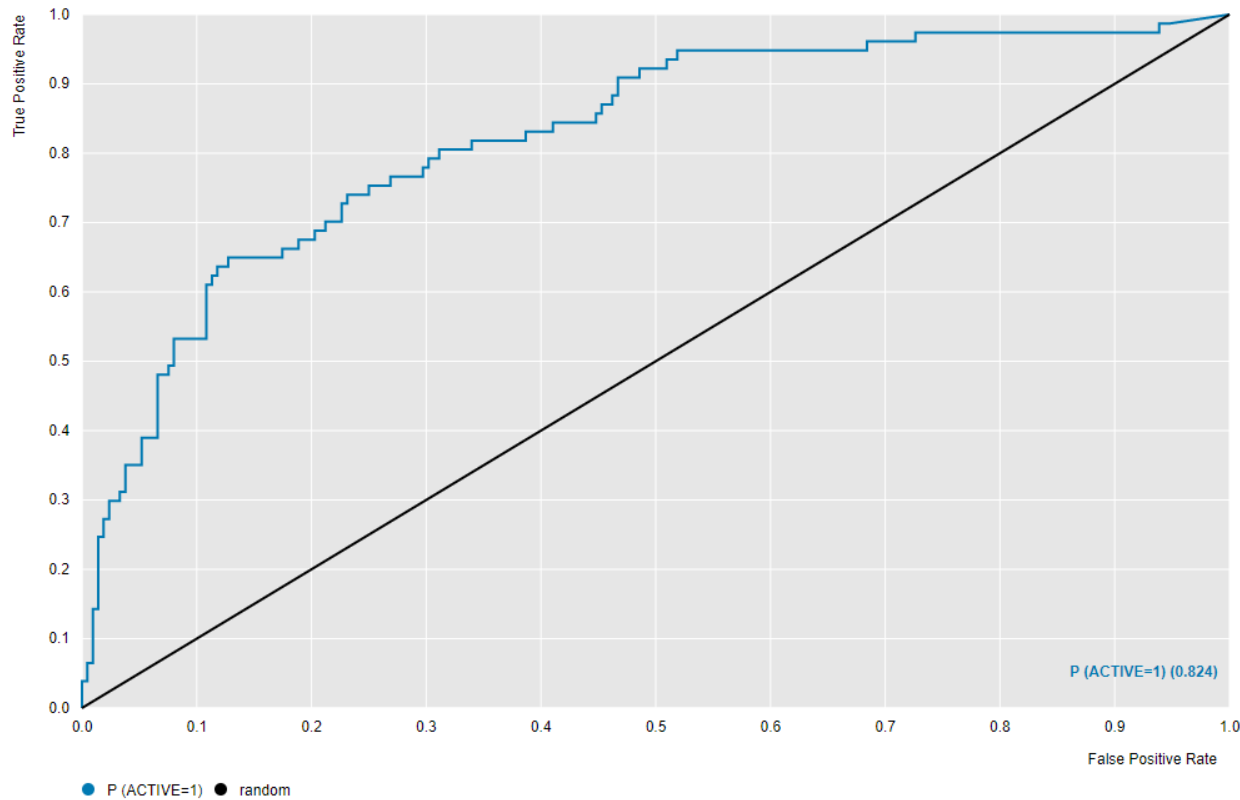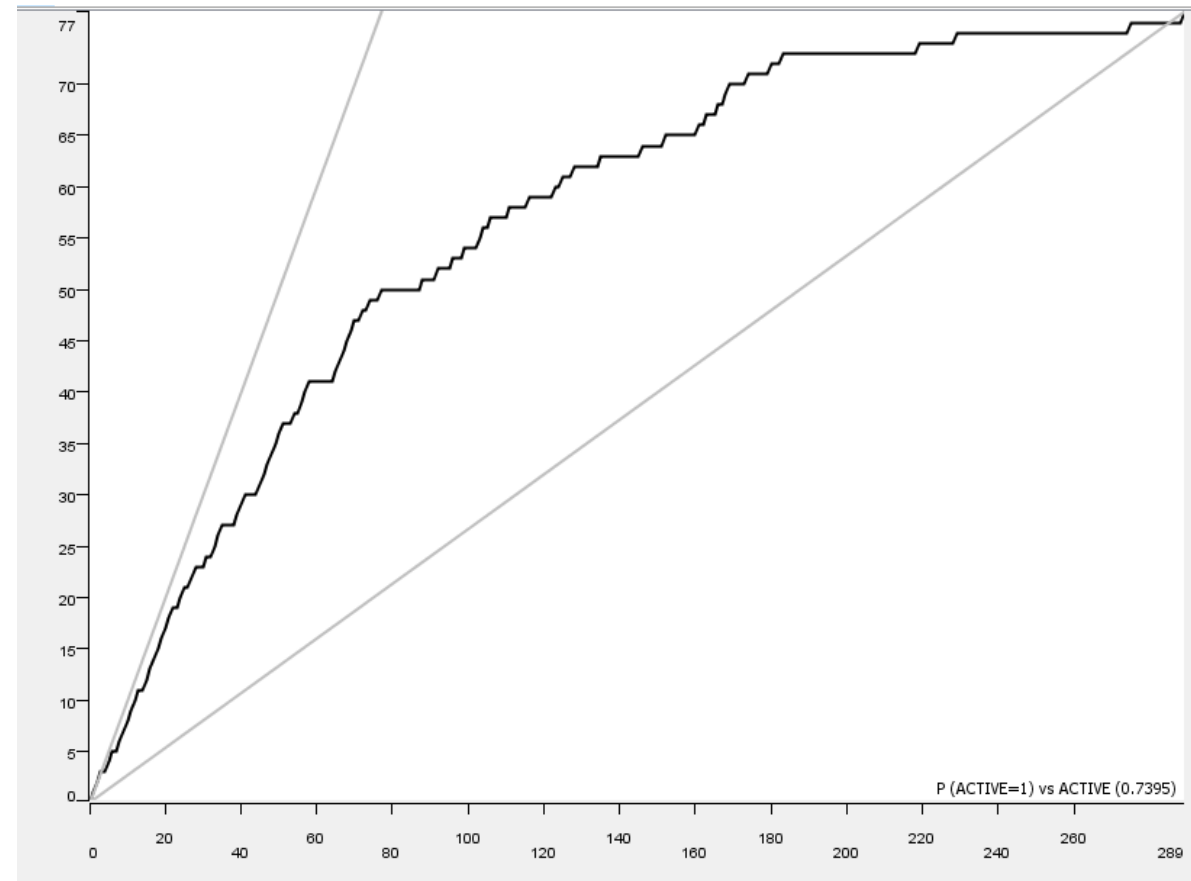

N=289

Top 10% Mean IC50

61.5 nM  
(one >800 nM  
Compound)

|          | Predicted Active | Predicted Inactive |
|----------|------------------|--------------------|
| Active   | 23               | 54                 |
| Inactive | 5                | 207                |

# PNN - <15 nM DefGood in c-Abl, 10% error; Random seed = 429

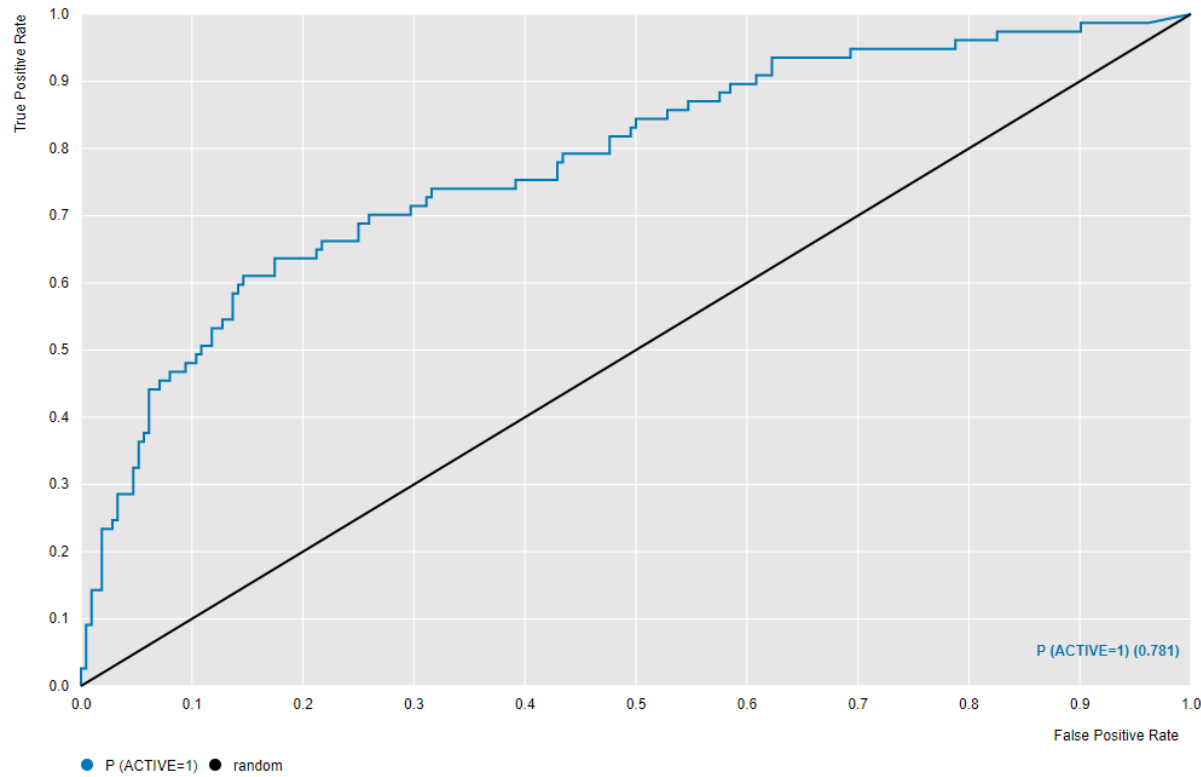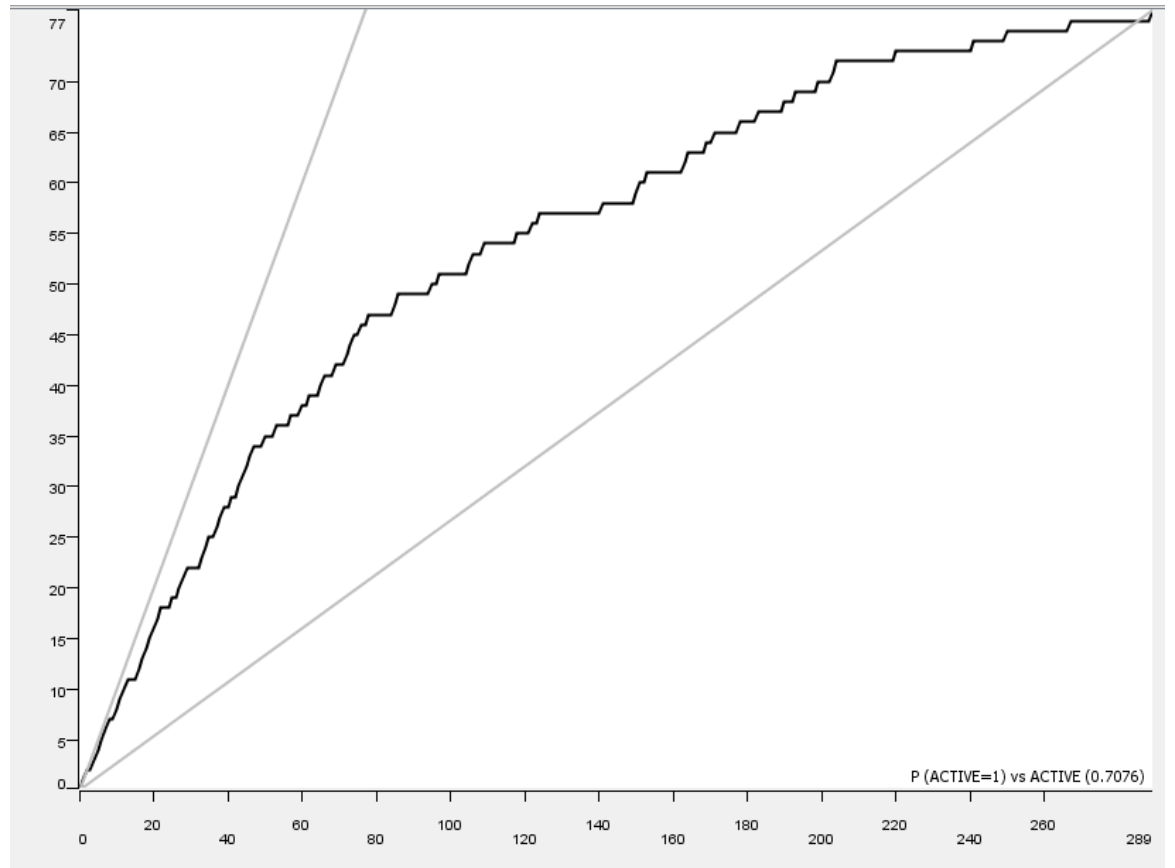

N=289

Top 10% Mean  
IC50

420 nM  
(one >800 nM  
compound, and  
one >10,000 nM)

|          | Predicted Active | Predicted Inactive |
|----------|------------------|--------------------|
| Active   | 32               | 45                 |
| Inactive | 13               | 199                |

# PNN - <15 nM DefGood in c-Abl, 15% error; Random seed = 429

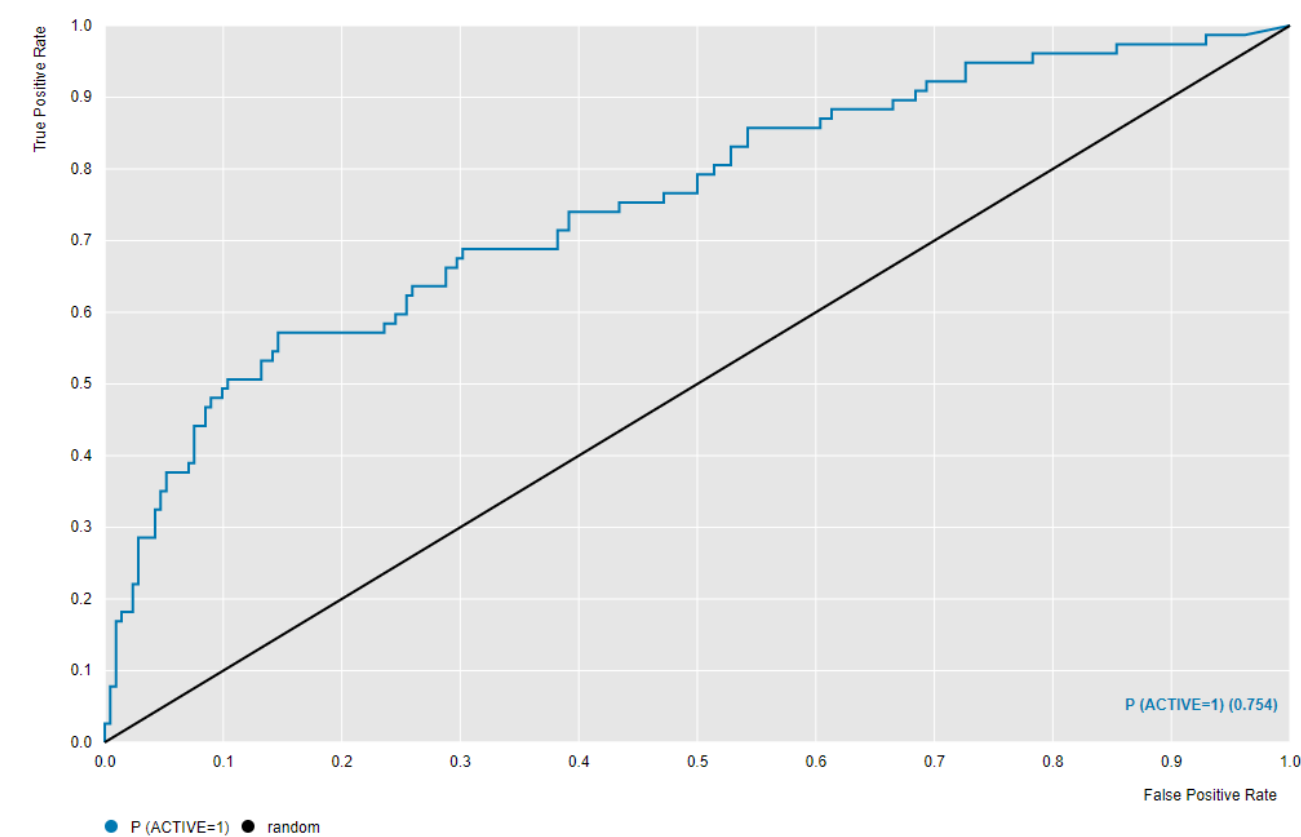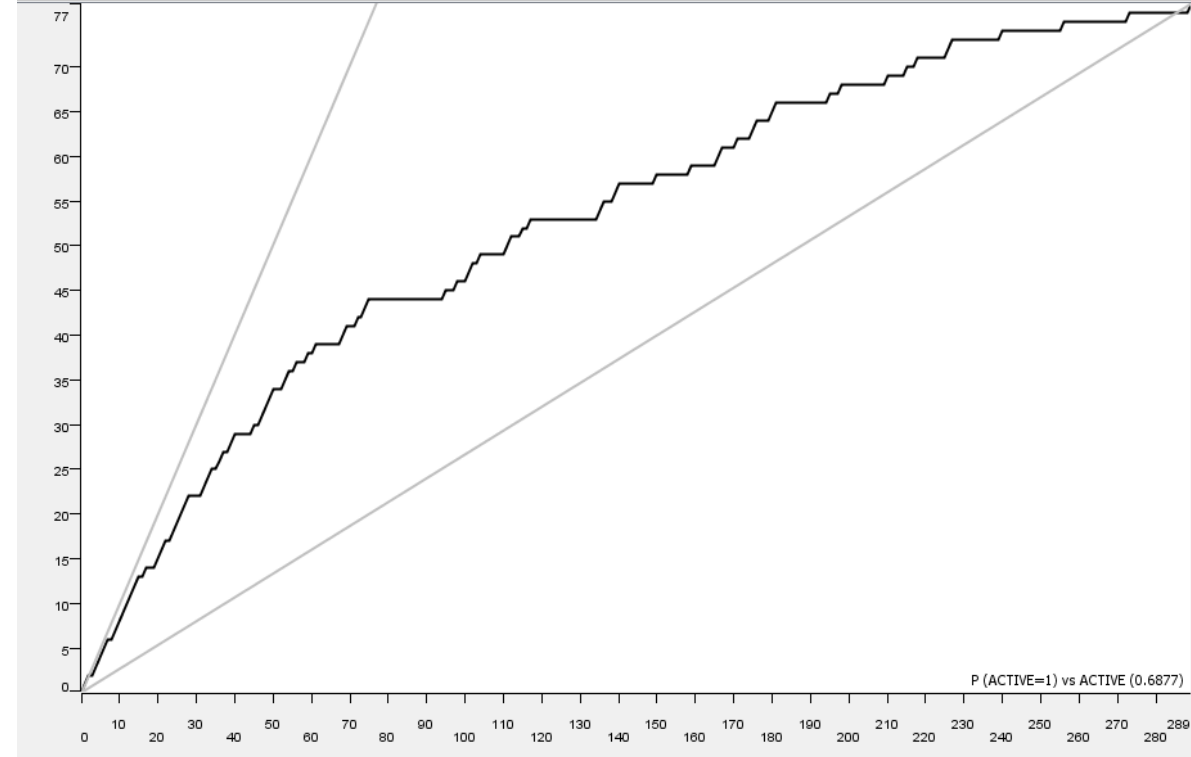

N=289

**Top 10% Mean  
IC50**

**390 nM  
(one >800 nM  
compound, and  
one >10,000 nM)**

|          | Predicted Active | Predicted Inactive |
|----------|------------------|--------------------|
| Active   | 34               | 43                 |
| Inactive | 17               | 195                |



# PNN - <15 nM DefGood in c-Abl, 20% error ;

## Random seed = 429

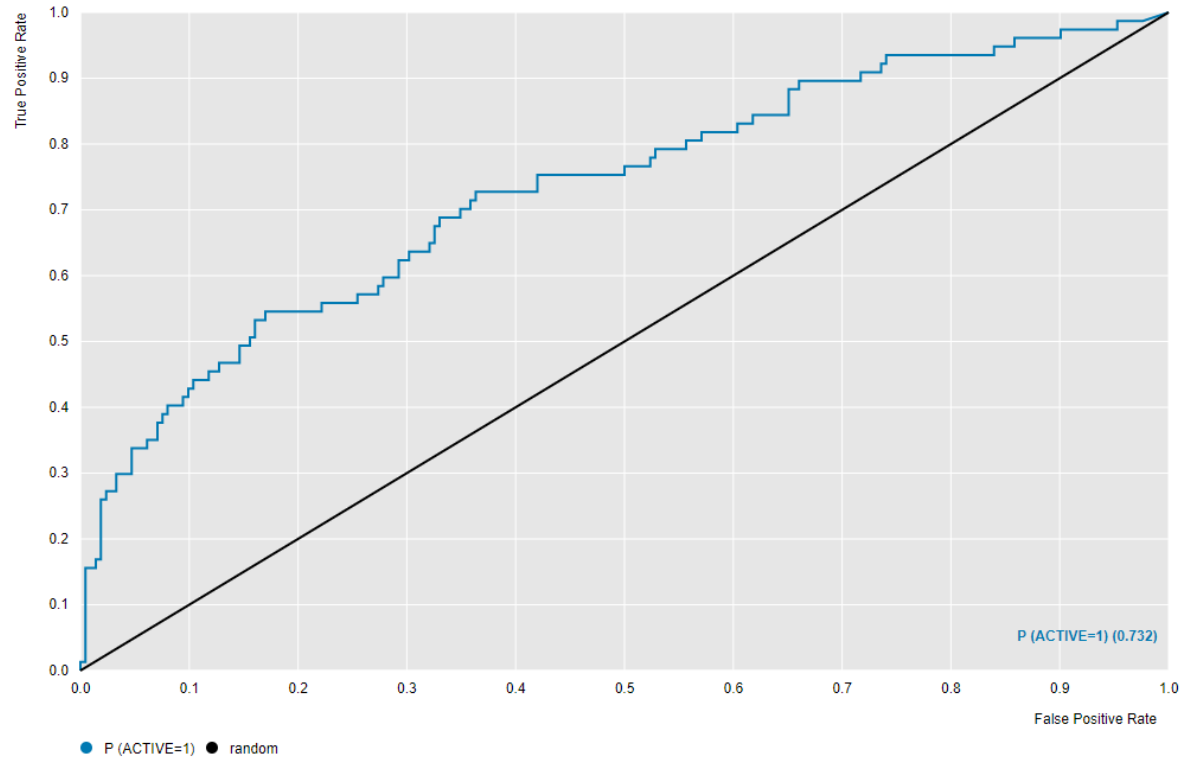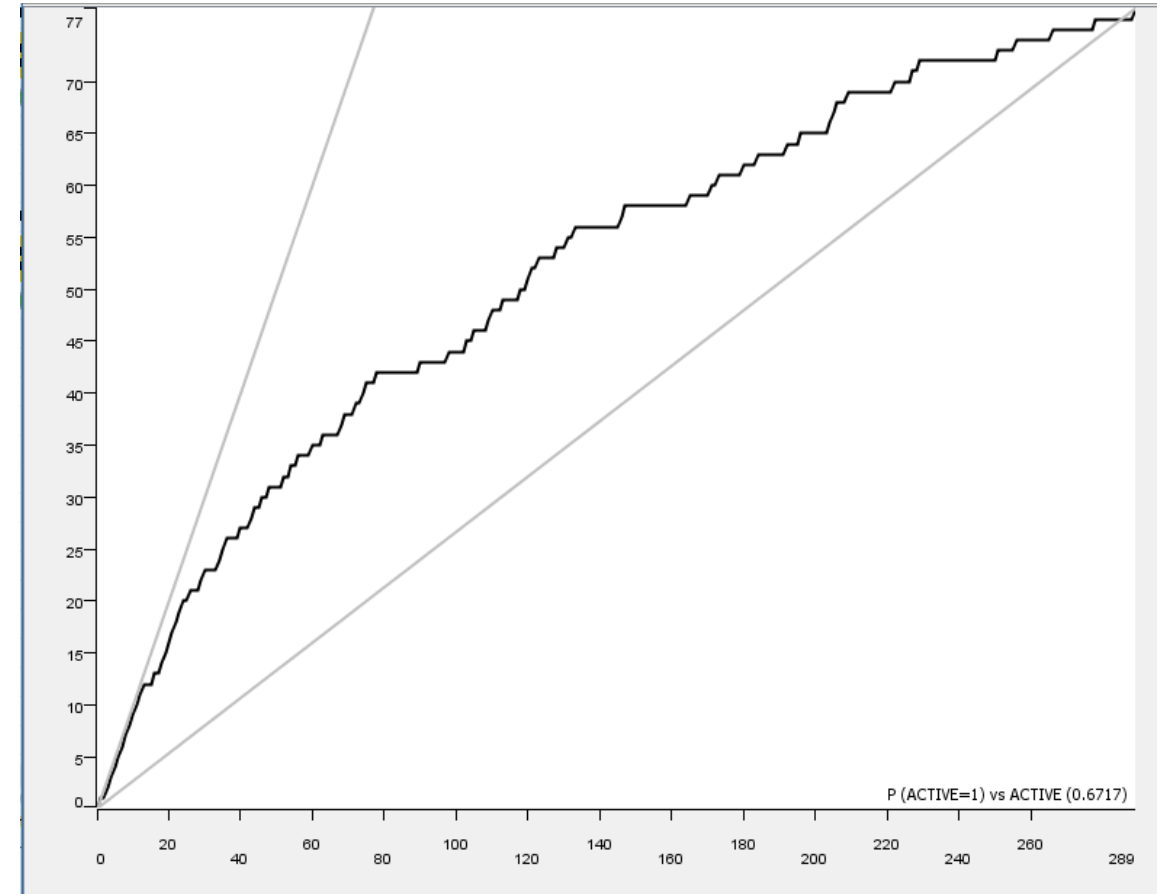

N=289

Top 10% Mean IC50

480 nM

Several uM mistakes

|          | Predicted Active | Predicted Inactive |
|----------|------------------|--------------------|
| Active   | 42               | 35                 |
| Inactive | 40               | 172                |

# PNN - <15 nM DefGood in c-Abl, 25% error ;

## Random seed = 429

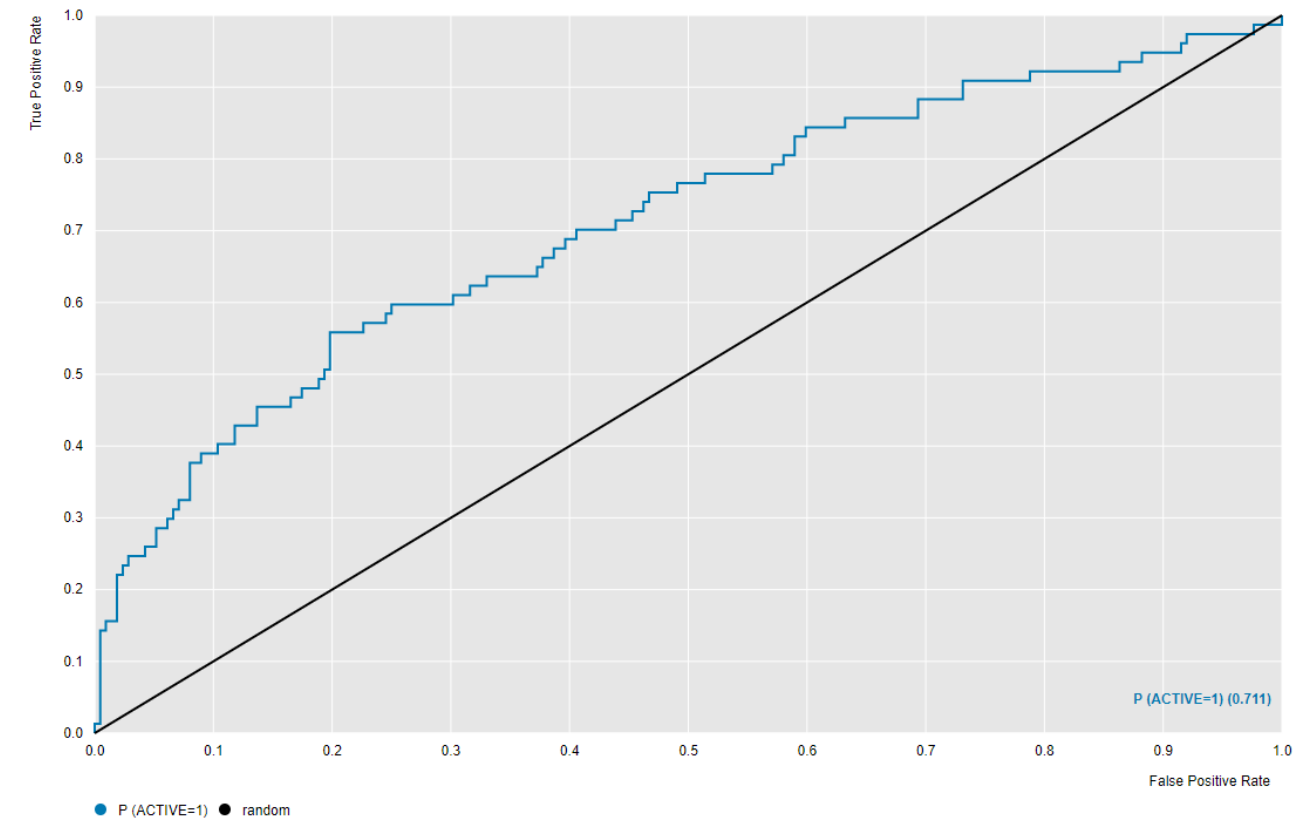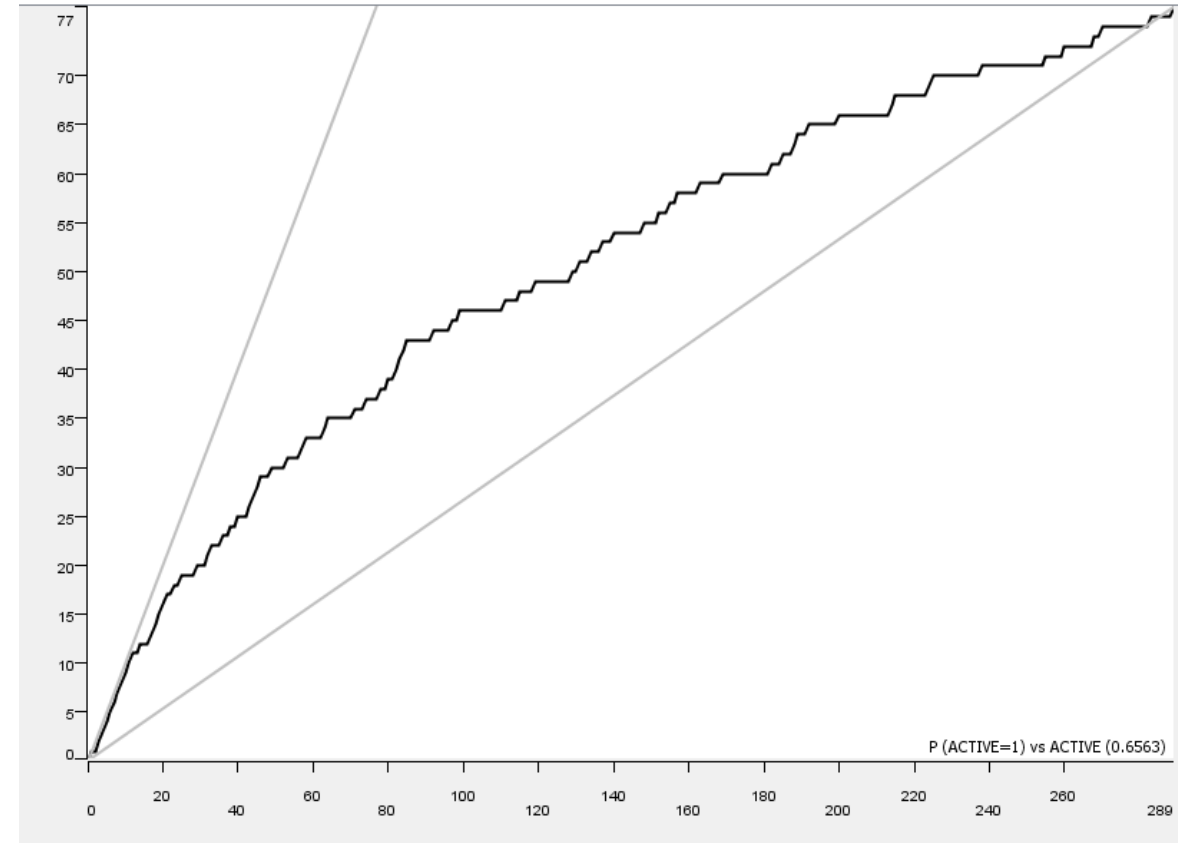

N=289

Top 10% Mean IC50

1,200 nM

|          | Predicted Active | Predicted Inactive |
|----------|------------------|--------------------|
| Active   | 45               | 32                 |
| Inactive | 52               | 160                |

# PNN - <15 nM DefGood in c-Abl, 30% error ;

## Random seed = 429

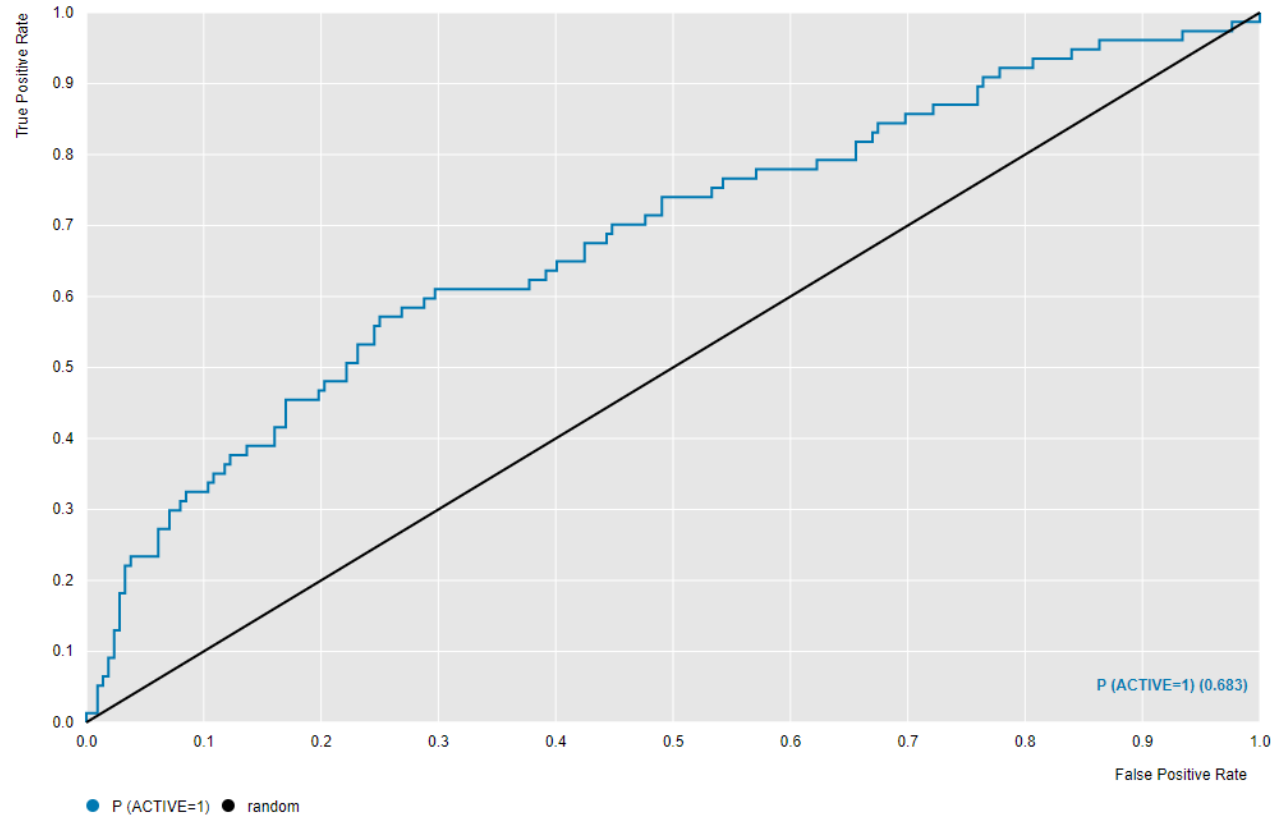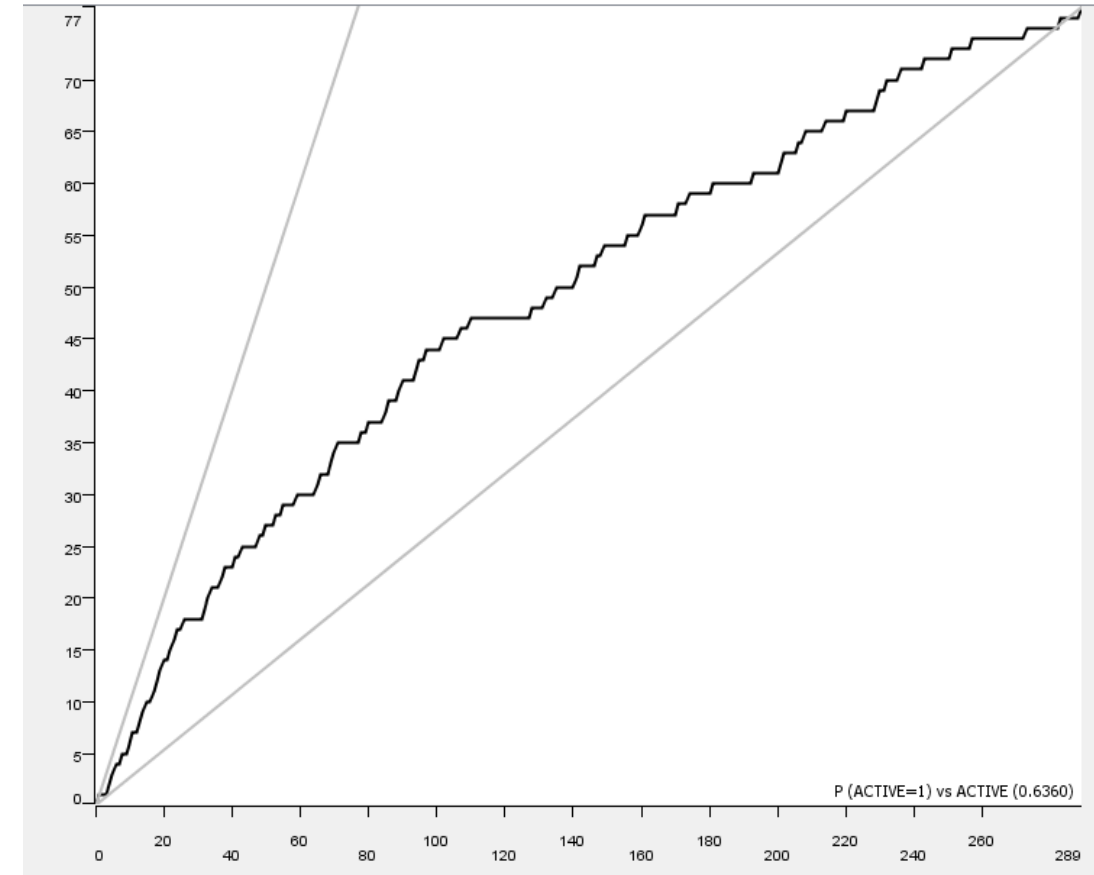

N=289

Top 10% Mean IC50

840 nM

Several uM mistakes

|          | Predicted Active | Predicted Inactive |
|----------|------------------|--------------------|
| Active   | 46               | 31                 |
| Inactive | 61               | 151                |

# PNN - <15 nM DefGood in c-Abl, 5% error; Random seed = 121783

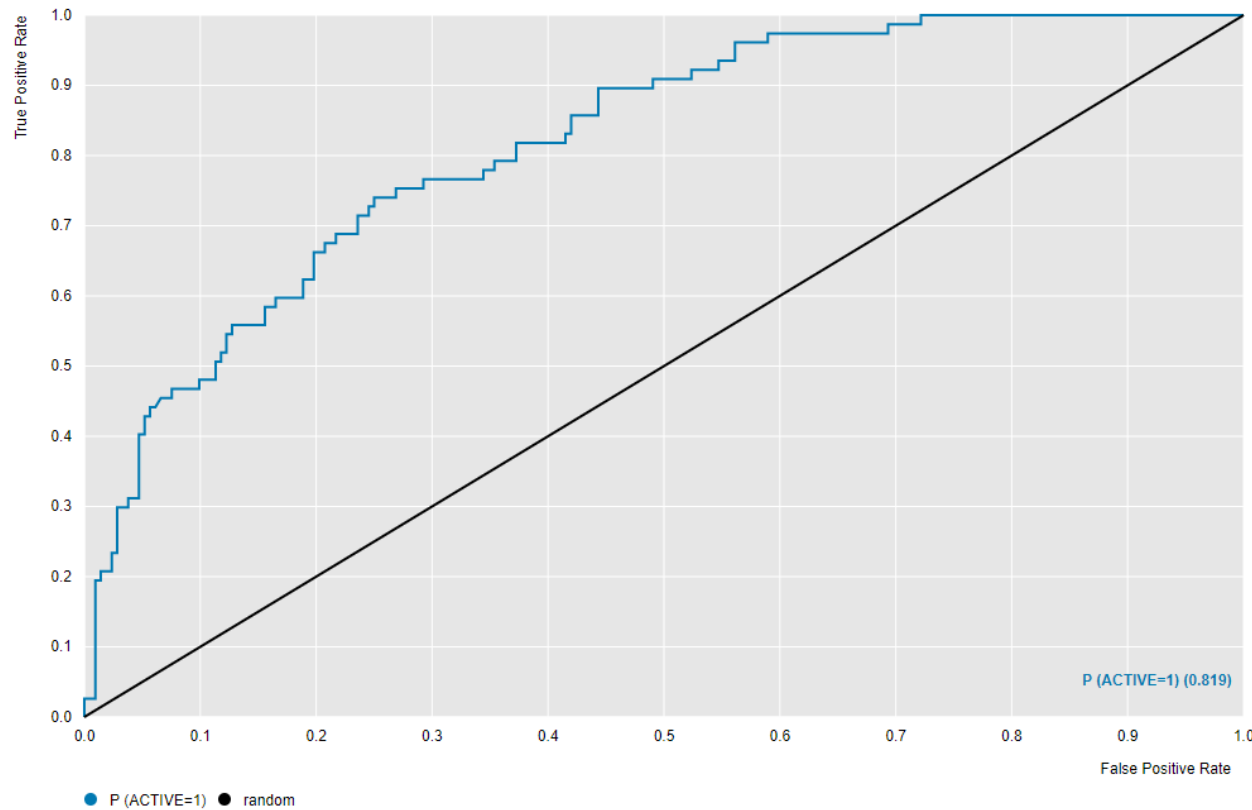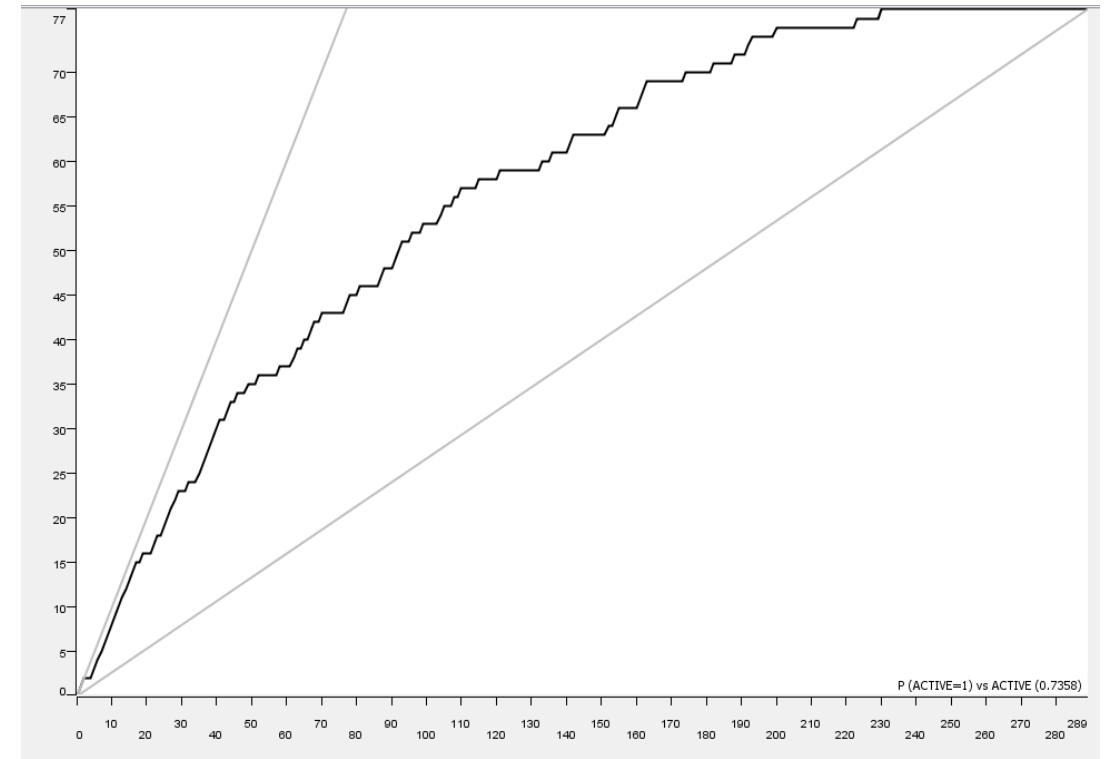

N=289

Top 10% Mean IC50

110 nM  
(two >800 nM  
compounds)

|          | Predicted Active | Predicted Inactive |
|----------|------------------|--------------------|
| Active   | 11               | 66                 |
| Inactive | 2                | 210                |

# PNN - <15 nM DefGood in c-Abl, 10% error; Random seed = 121783

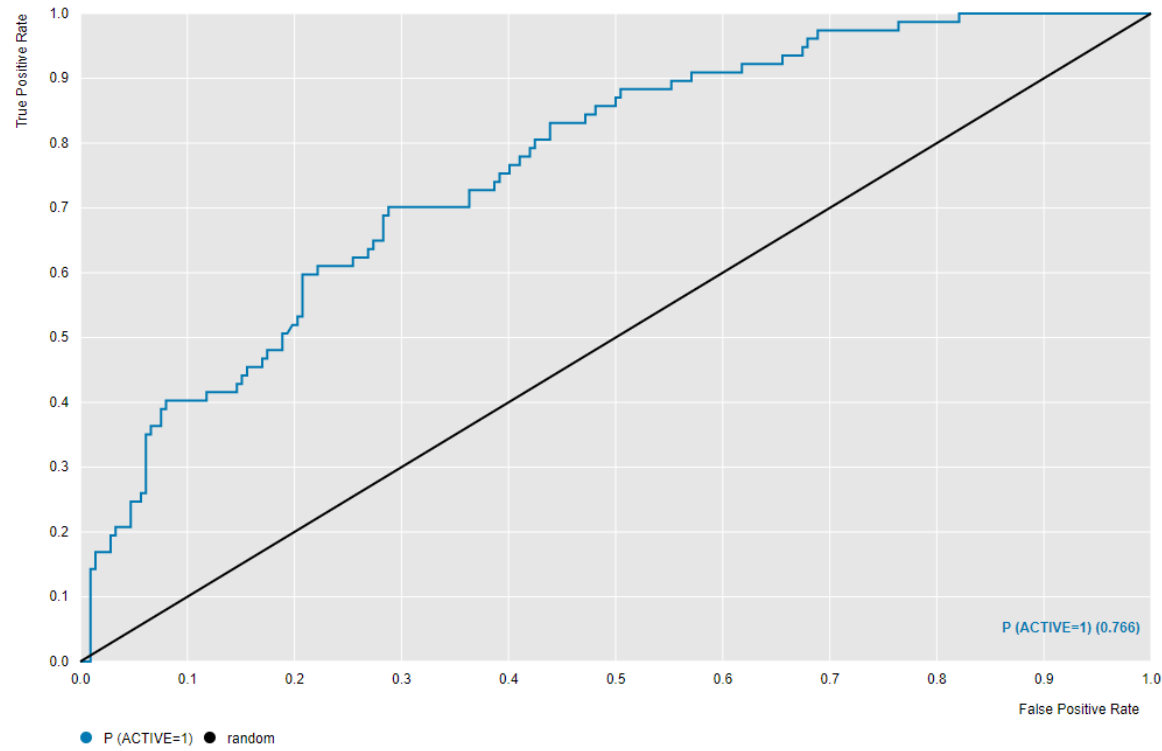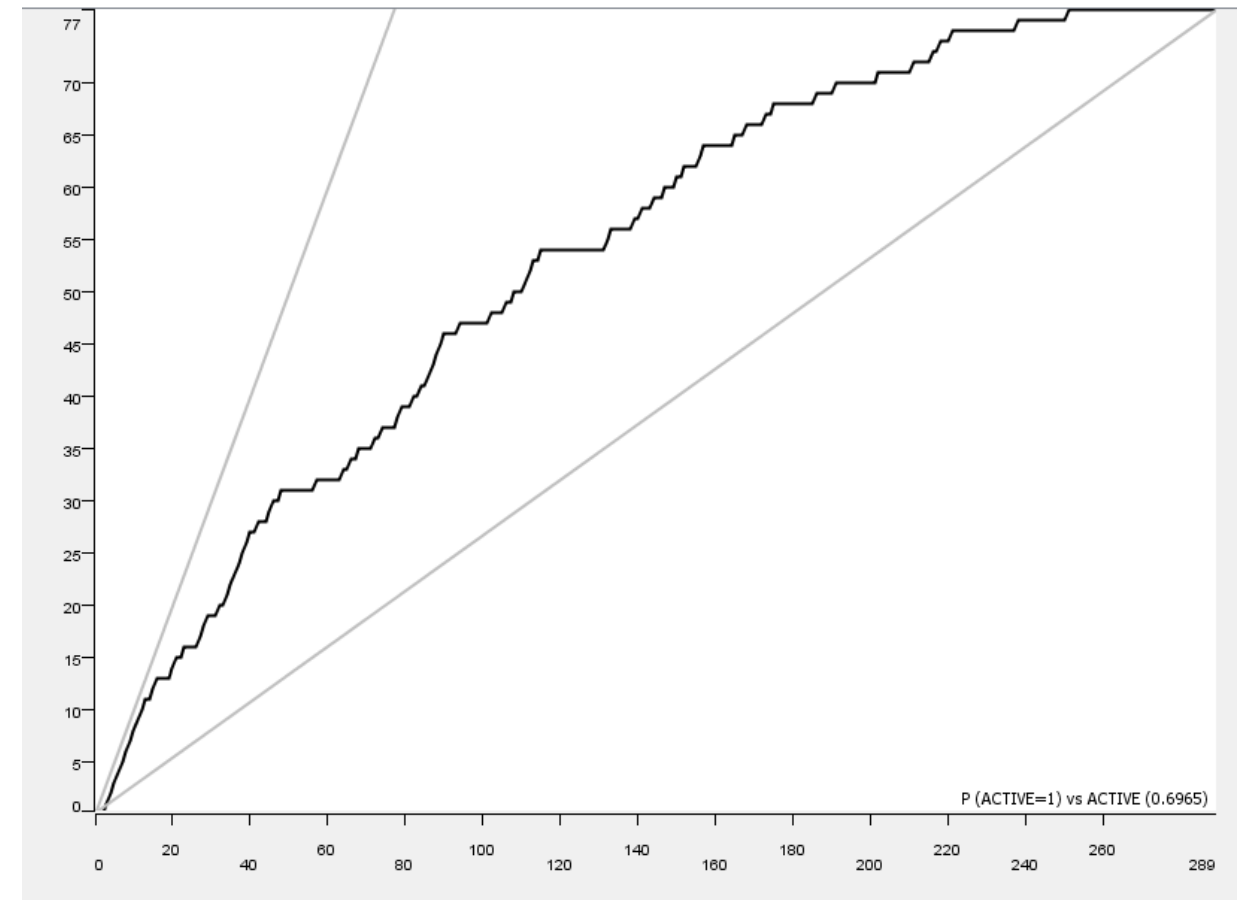

N=289

|                      |                                        |
|----------------------|----------------------------------------|
| Top 10% Mean<br>IC50 | 370 nM<br>(several severe<br>mistakes) |
|----------------------|----------------------------------------|

|          | Predicted Active | Predicted Inactive |
|----------|------------------|--------------------|
| Active   | 8                | 69                 |
| Inactive | 2                | 210                |

PNN - <15 nM DefGood in c-Abl, 15% error;  
Random seed = 121783

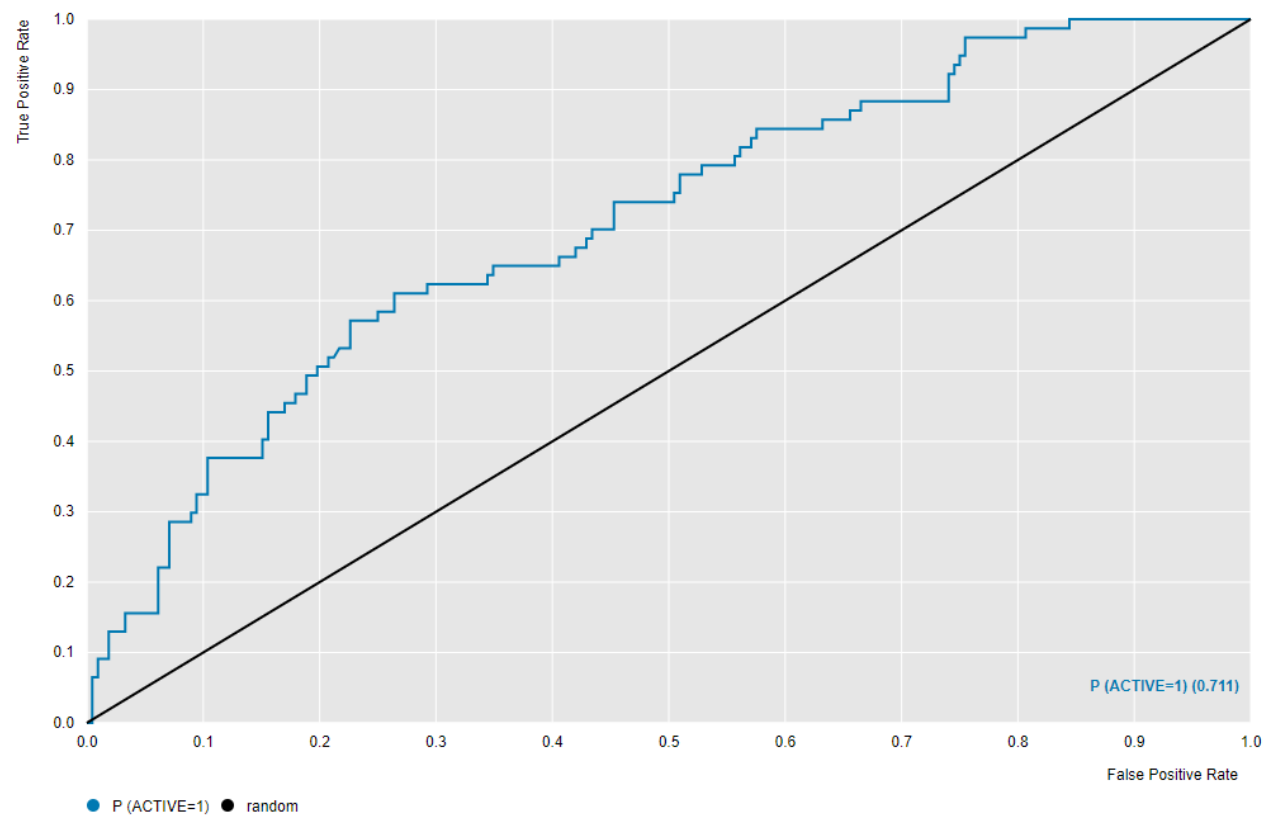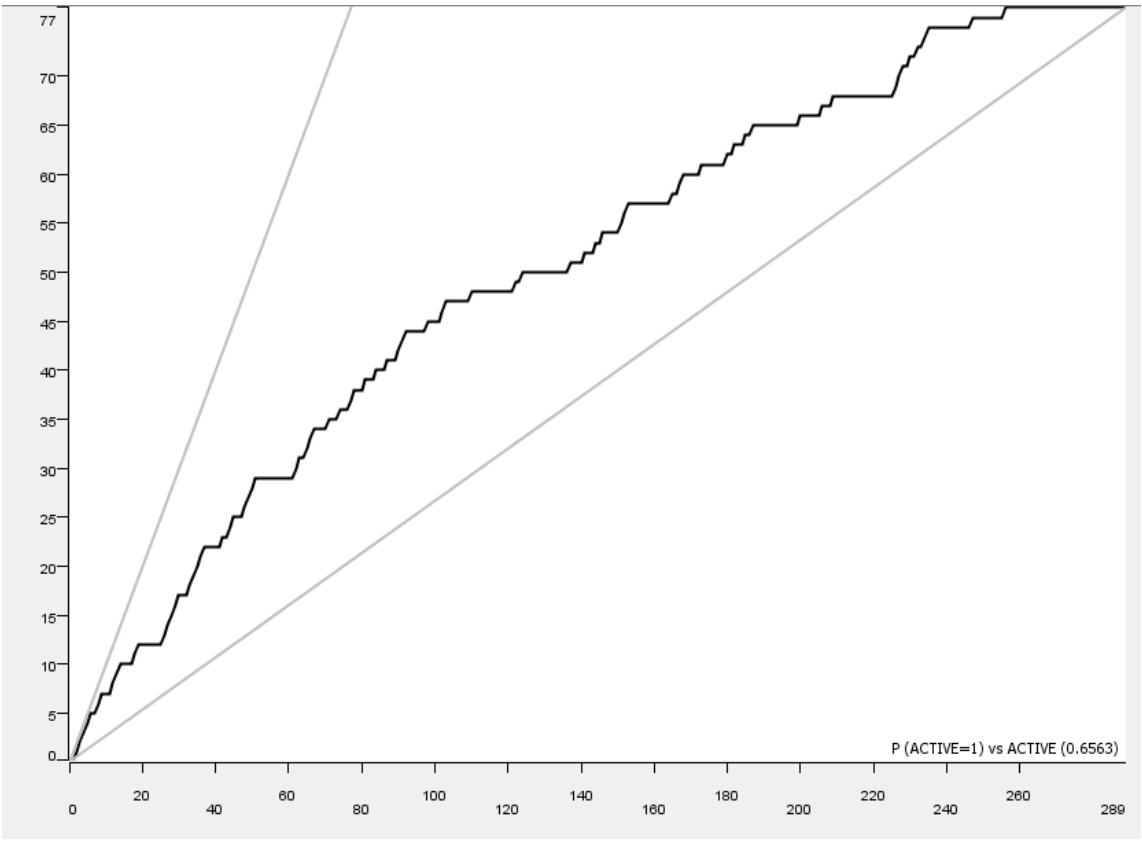

N=289

|                      |          |
|----------------------|----------|
| Top 10% Mean<br>IC50 | 2,500 nM |
|----------------------|----------|

|          | Predicted Active | Predicted Inactive |
|----------|------------------|--------------------|
| Active   | 5                | 72                 |
| Inactive | 2                | 210                |

# Reparameterization Control - 15% error; Random seed = 121783

- Theta minus – 0.05
- Theta Plus – 0.85
- Reparameterization failed to recover predictivity Mean 10% IC50 – 2,500 nM

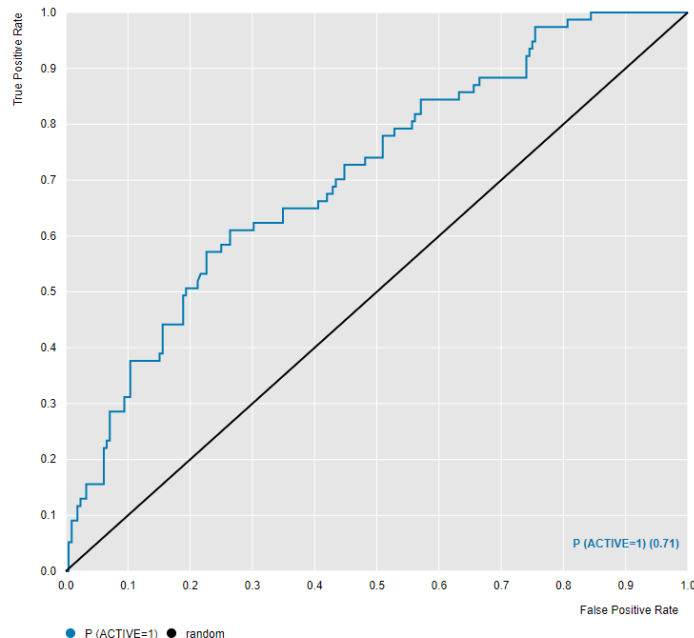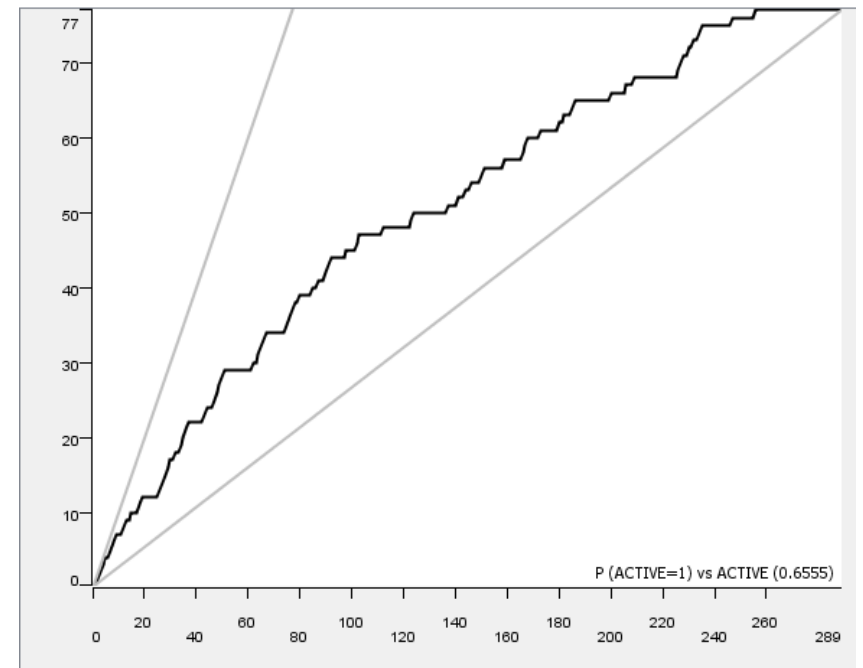

# Conclusion - PNN

- Across three random seeds, the % error that lead to a significant specificity failure, enrichment failure and/or top 10% IC50 increase in the retrospective test was 30%, 25% and 15% for each unique random seed.
- Reparameterization failed to rescue the 15% learner.



Activated Xa

# Factor Xa NBN Design

- Rules -  $\$RELATION\$ = "="$  OR  $\$IC50\$ > 999$  OR  $\$IC50\$ < 10 \Rightarrow TRUE$
- Sort ascending and remove duplicates
- DefGood scanned between 2.5 and 25 nM
- 80-20 split for both actives and inactives
- NBN – ECFP4 used Classifier where Prediction was Active = True
- Resulted in 1657 compounds after cleaning the data

# <2.5 nM DefGood in Xa

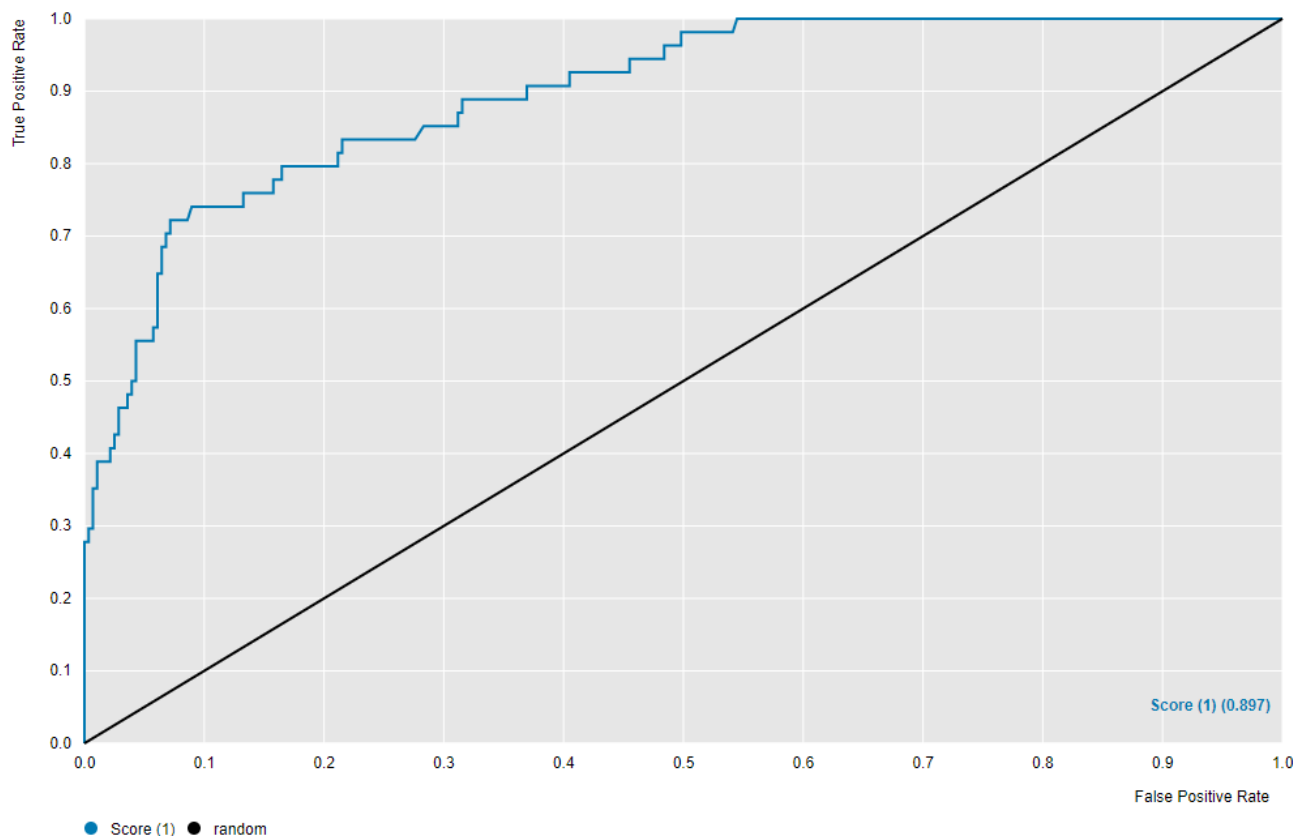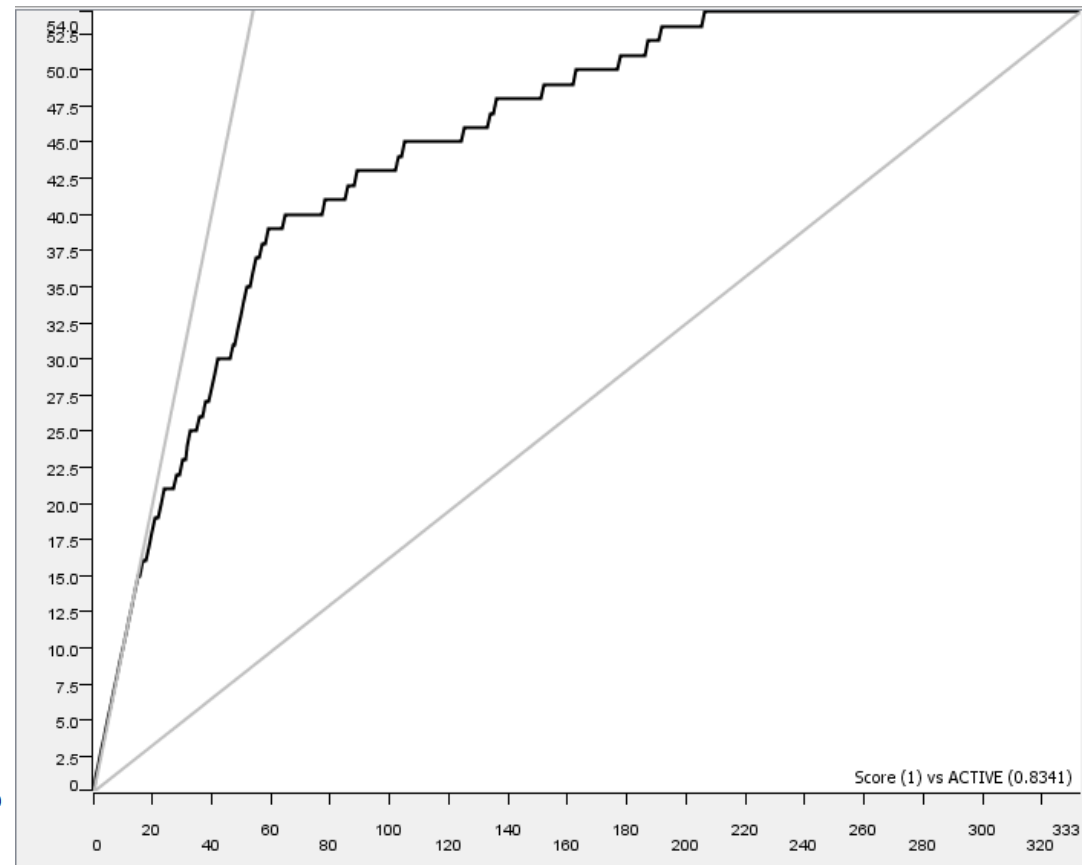

N=332

| Top 10% Mean<br>IC50 | 3.2 nM |
|----------------------|--------|
|----------------------|--------|

|          | Predicted Active | Predicted Inactive |
|----------|------------------|--------------------|
| Active   | 43               | 11                 |
| Inactive | 52               | 227                |

# <5 nM DefGood in Xa

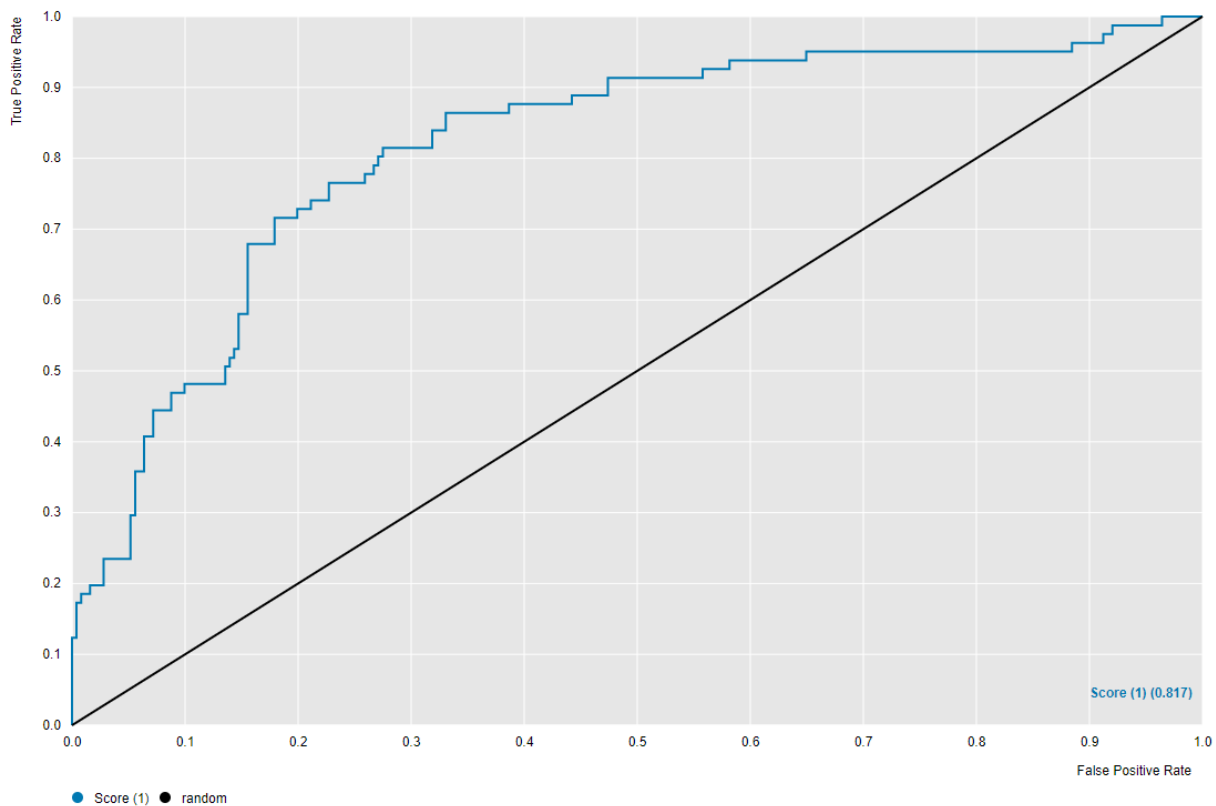

N=332

|                      |        |
|----------------------|--------|
| Top 10% Mean<br>IC50 | 9.9 nM |
|----------------------|--------|

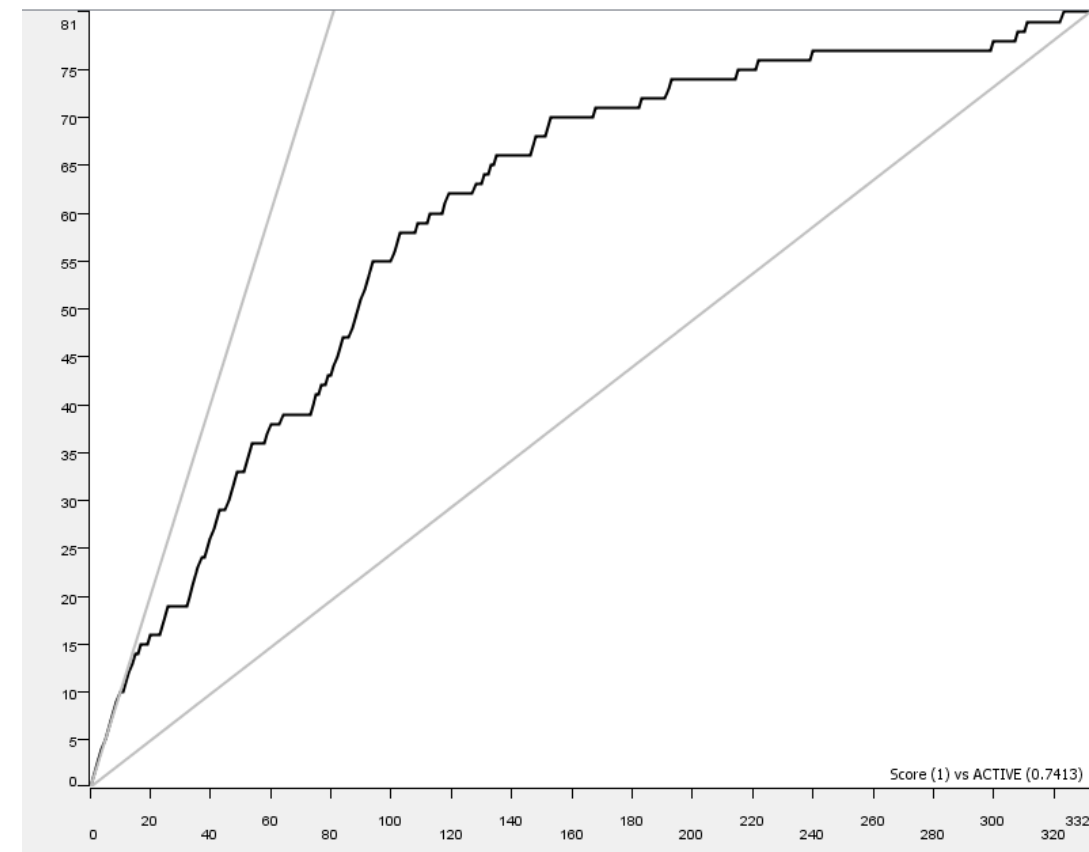

|          | Predicted Active | Predicted Inactive |
|----------|------------------|--------------------|
| Active   | 66               | 15                 |
| Inactive | 69               | 182                |

# <10 nM DefGood in Xa

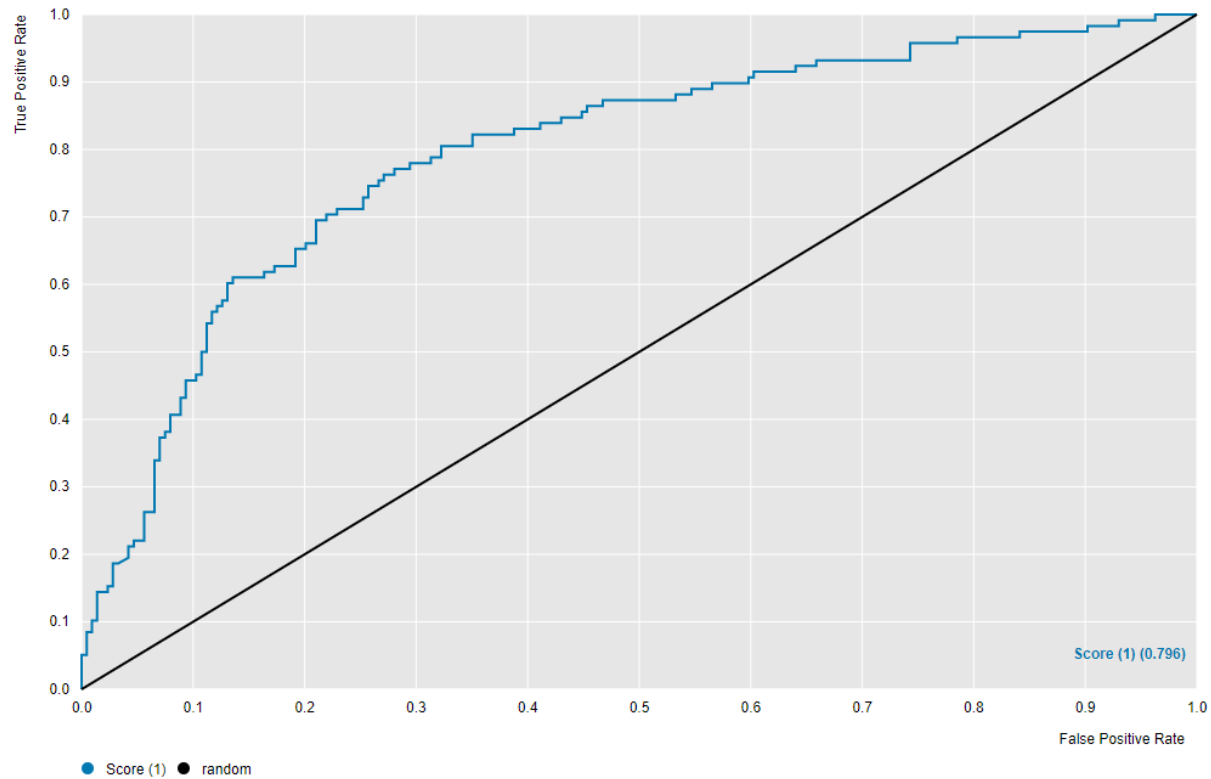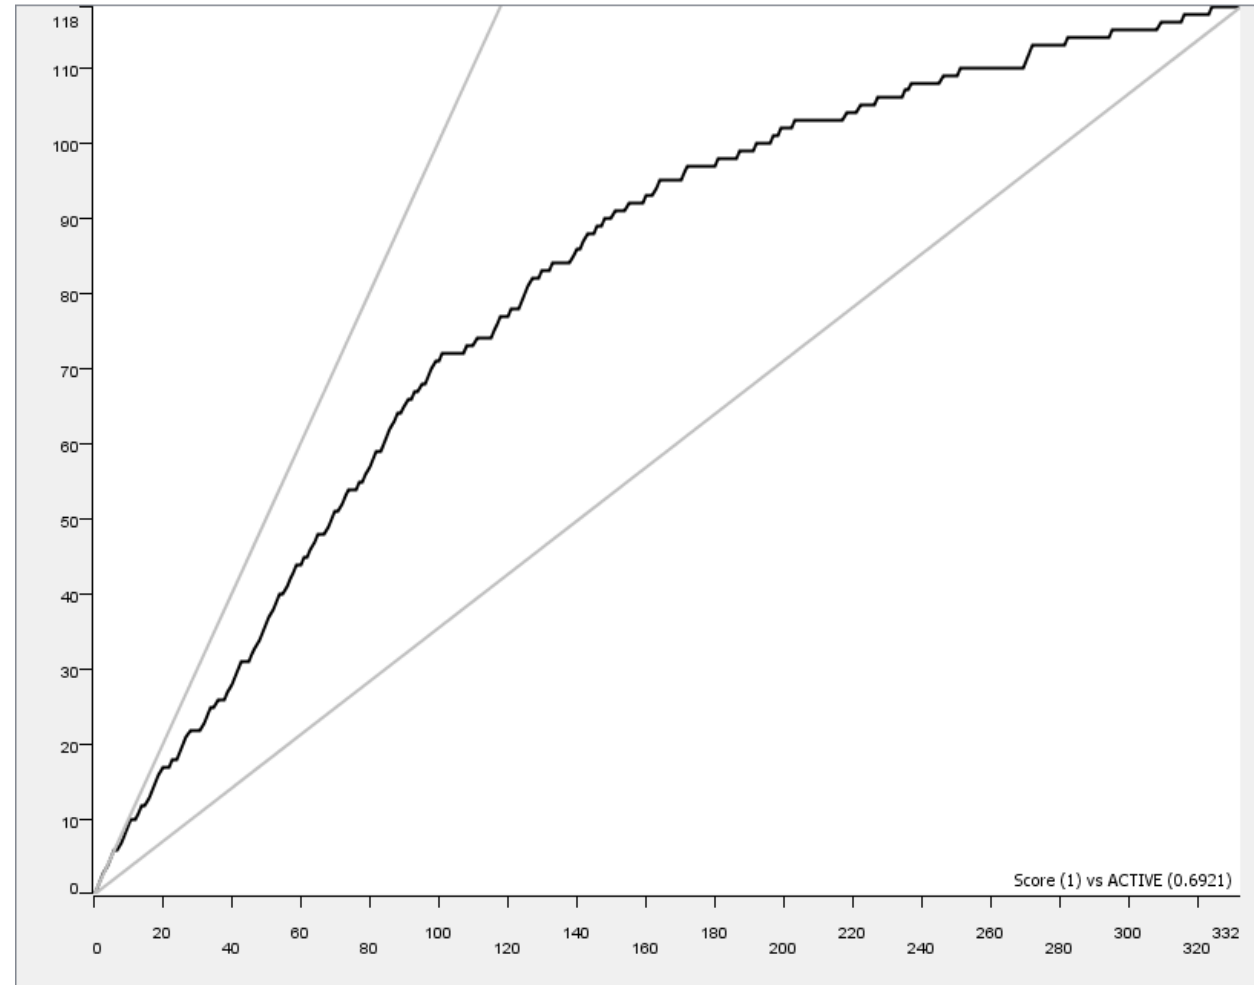

N=332

Top 10% Mean  
IC50

11 nM

|          | Predicted Active | Predicted Inactive |
|----------|------------------|--------------------|
| Active   | 83               | 35                 |
| Inactive | 47               | 167                |

# <15 nM DefGood in Xa

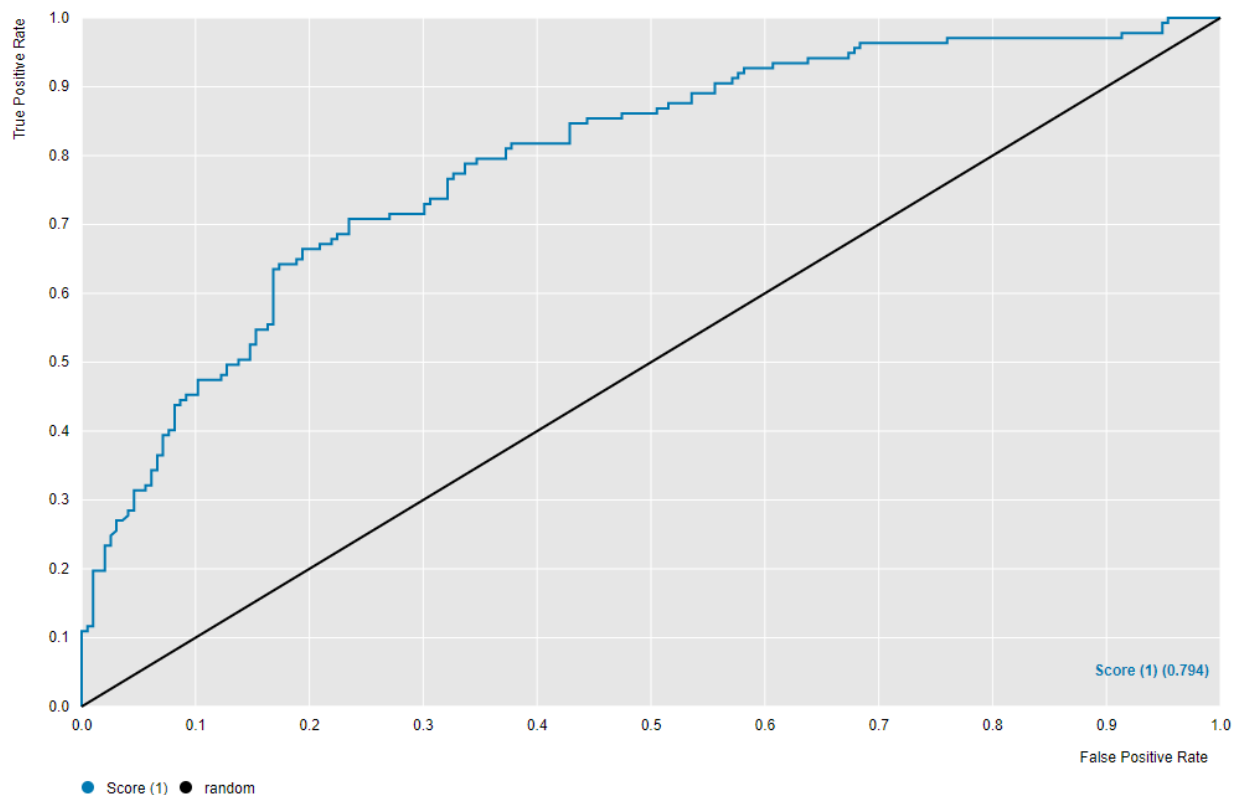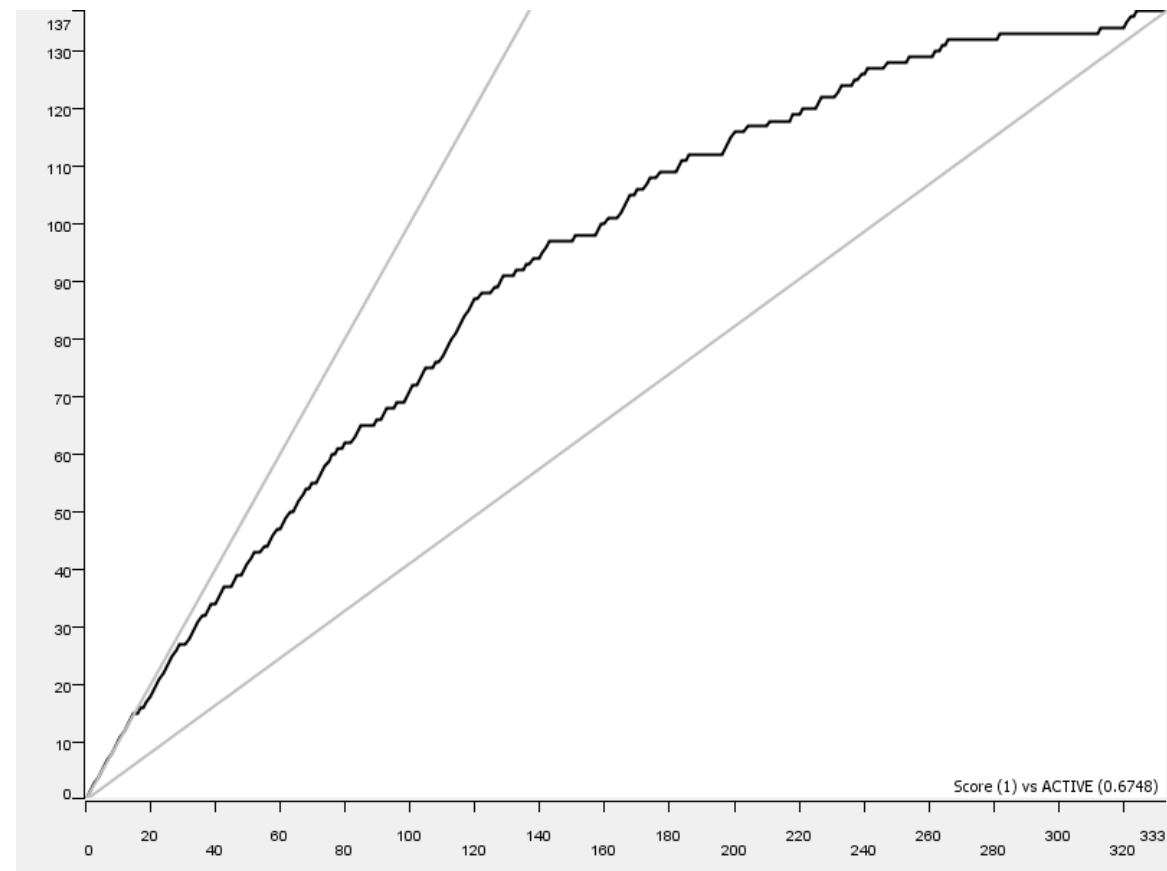

N=333

Top 10% Mean  
IC50

5.5 nM

|          | Predicted Active | Predicted Inactive |
|----------|------------------|--------------------|
| Active   | 101              | 36                 |
| Inactive | 62               | 134                |

# <20 nM DefGood in Xa

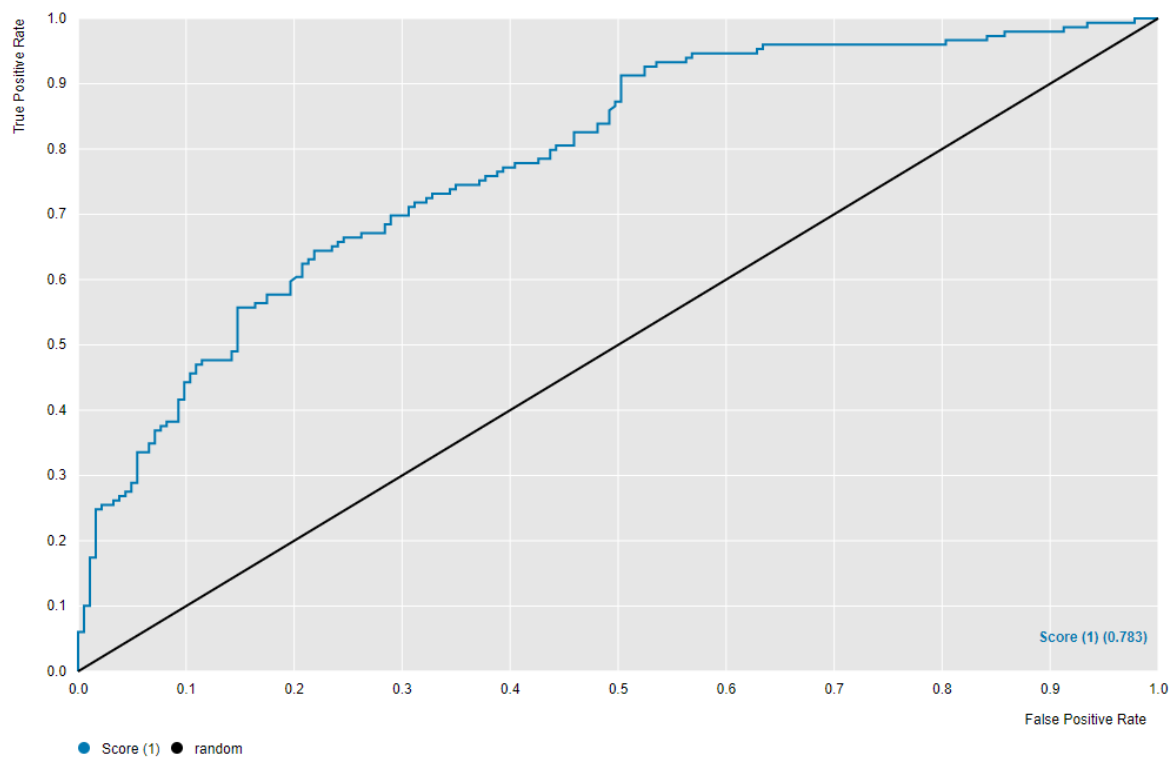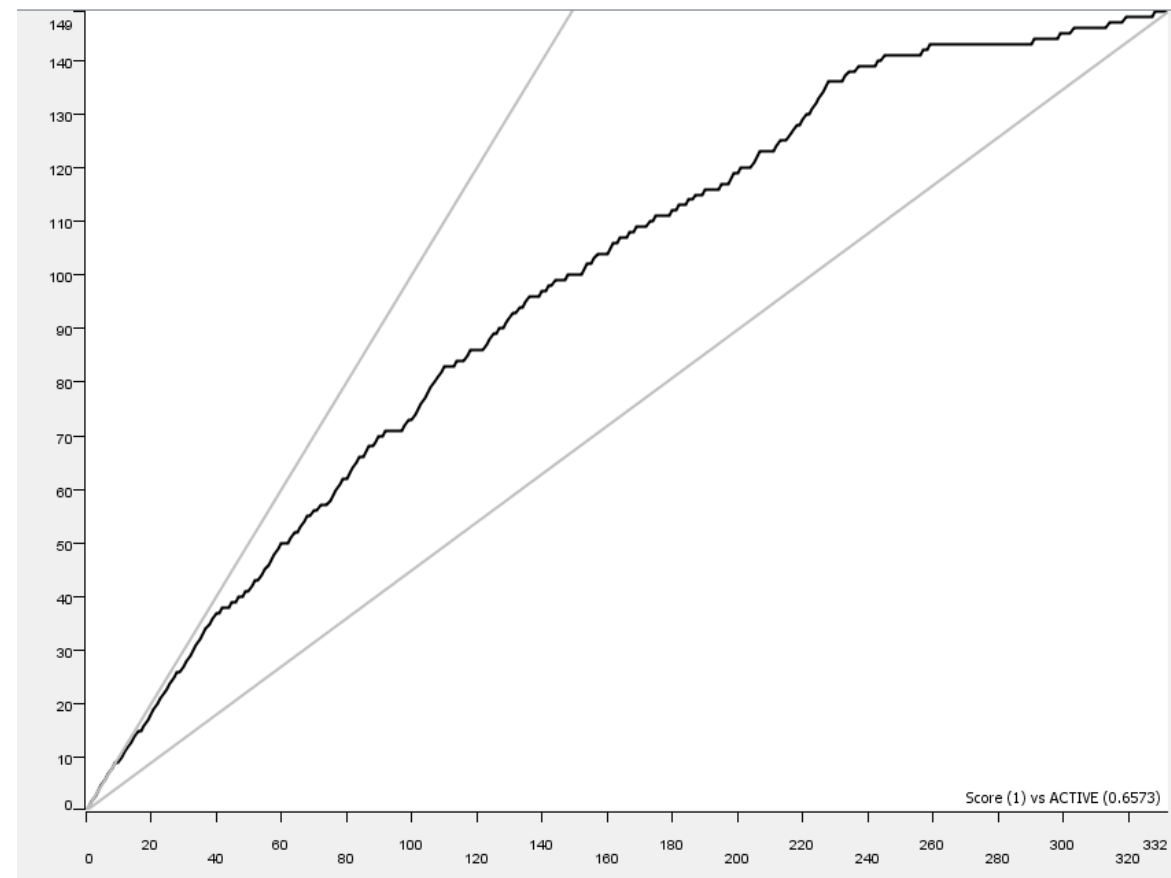

N=332

Top 10% Mean  
IC50

5.5 nM

|          | Predicted Active | Predicted Inactive |
|----------|------------------|--------------------|
| Active   | 113              | 36                 |
| Inactive | 70               | 113                |

# Decision on DefGood

- <2.5 nM has the best IC50 mean at top 10% and enrichment. The specificity is the worst compared to the others



# RF - <2.5 nM DefGood in Xa

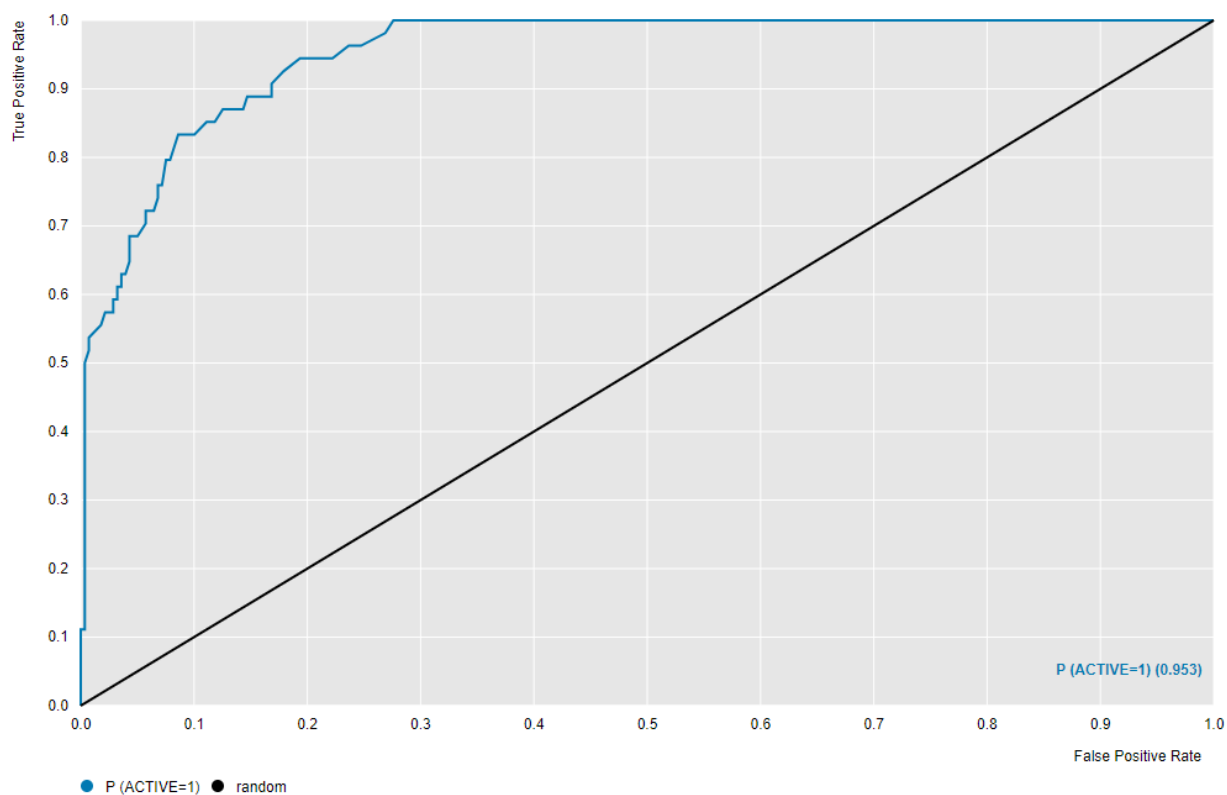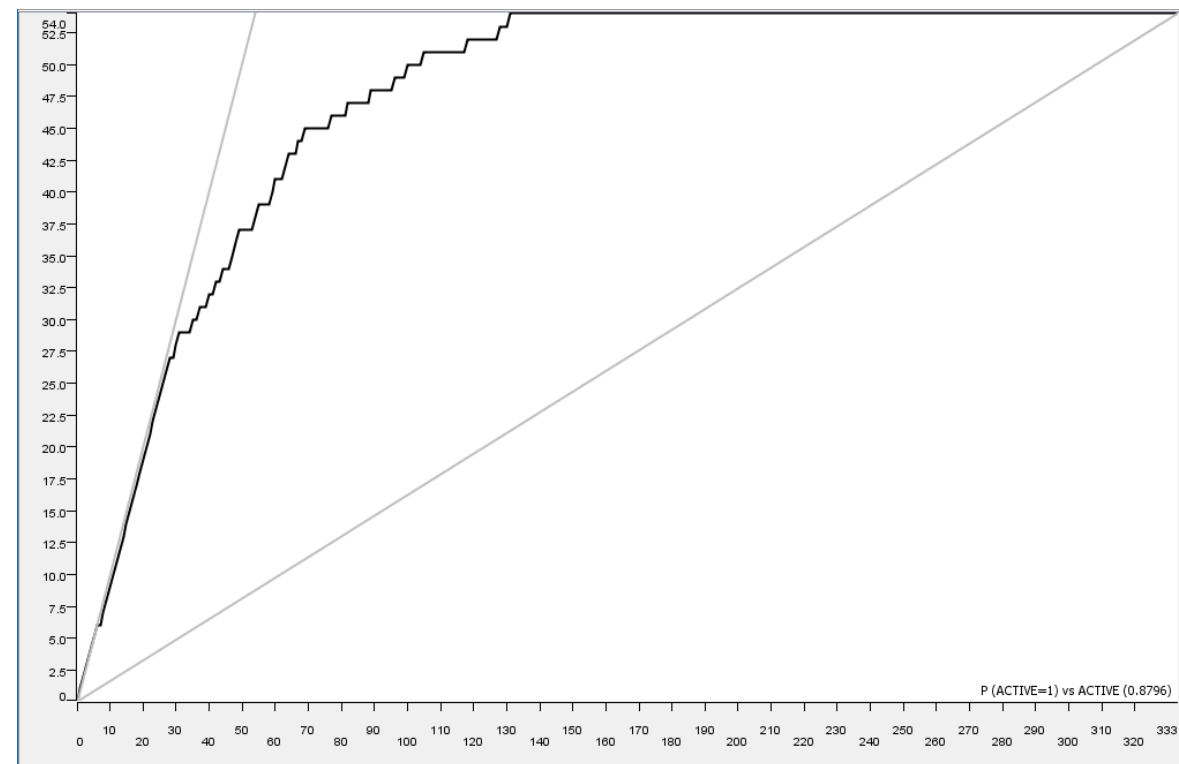

N=289

Top 10% Mean  
IC50

10 nM

|          | Predicted Active | Predicted Inactive |
|----------|------------------|--------------------|
| Active   | 38               | 16                 |
| Inactive | 16               | 263                |

# PNN - <2.5 nM DefGood in Xa

- Properties List (46 calculatable properties were used)
- Parameterization (Global Accuracy for Activity at a 2.5 nM decision value was used, and a 5-fold stratified sampling cross validation was used to parameterize theta minus and theta plus) Theta Minus = 0.05 and Theta Plus = 0.75

# PNN - <2.5 nM DefGood in Xa

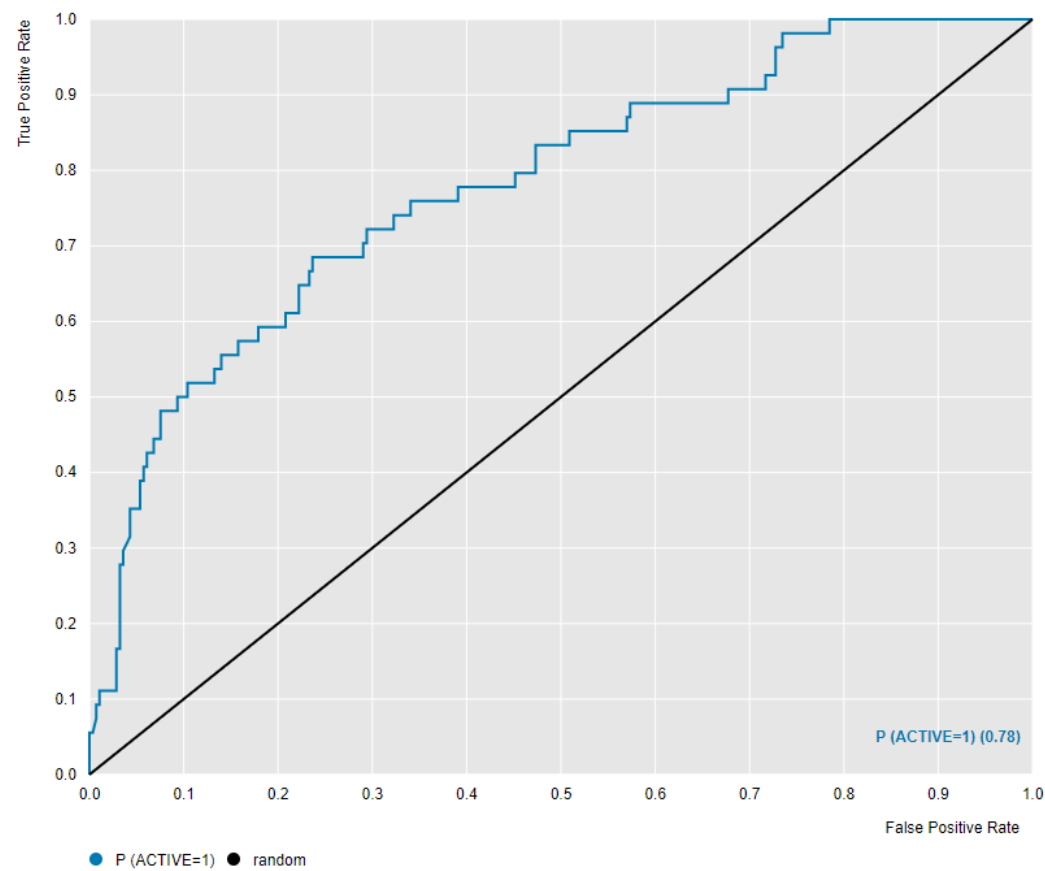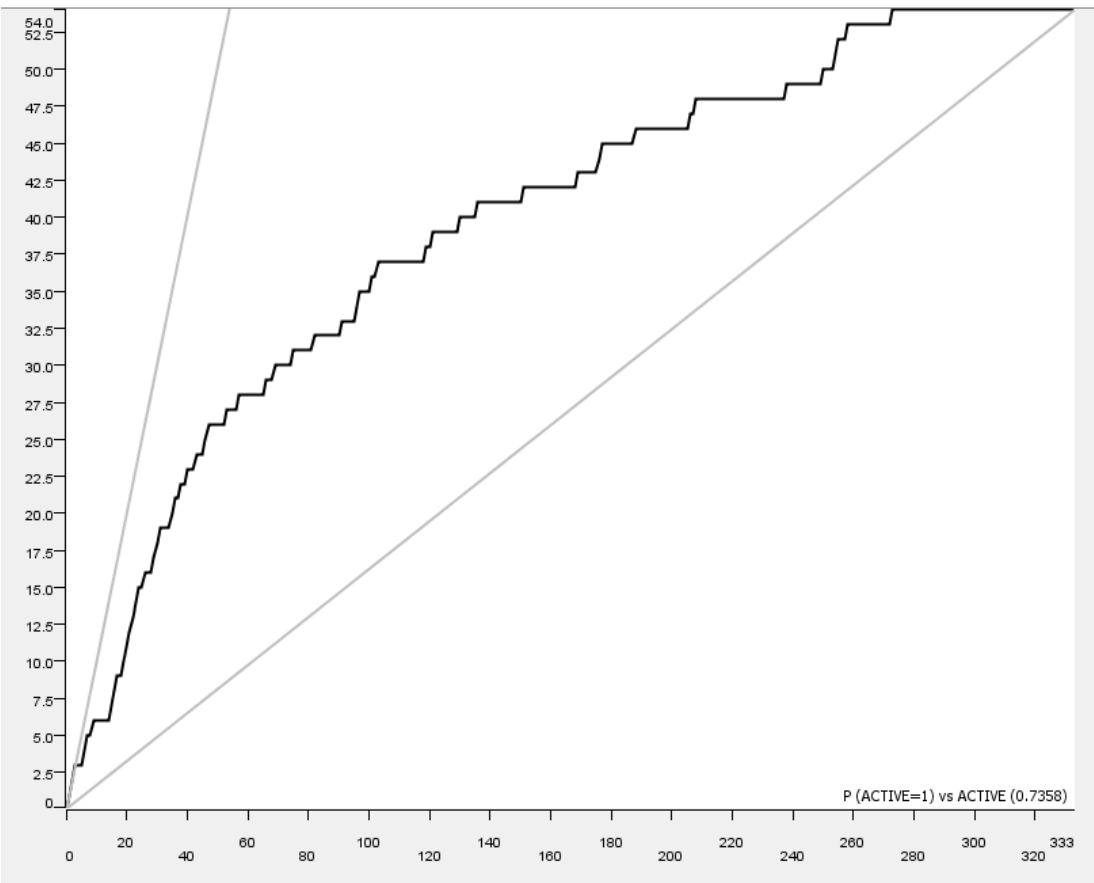

N=333

|                      |       |
|----------------------|-------|
| Top 10% Mean<br>IC50 | 23 nM |
|----------------------|-------|

|          | Predicted Active | Predicted Inactive |
|----------|------------------|--------------------|
| Active   | 18               | 36                 |
| Inactive | 12               | 267                |

# NBN Error Tolerance- <2.5 nM DefGood in Xa

- 0-50% absolute error

<2.5 nM DefGood in Xa, 5% error; Random seed = 1515533876005

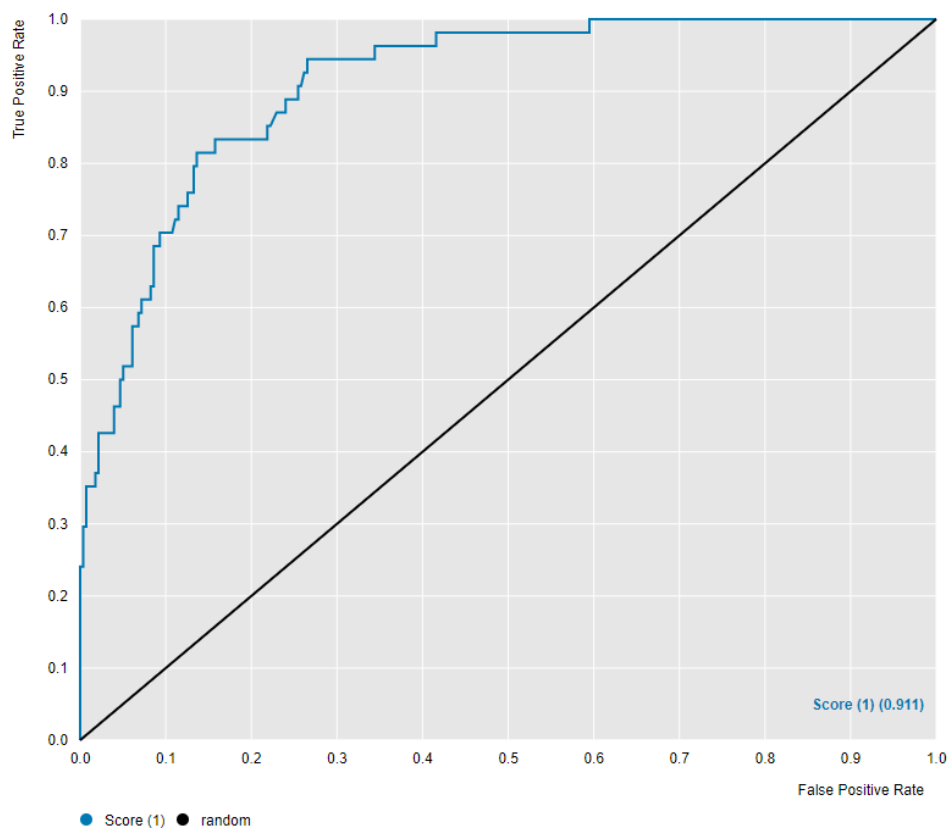

N=333

| Top 10% Mean IC50 | 6.3 |
|-------------------|-----|
|-------------------|-----|

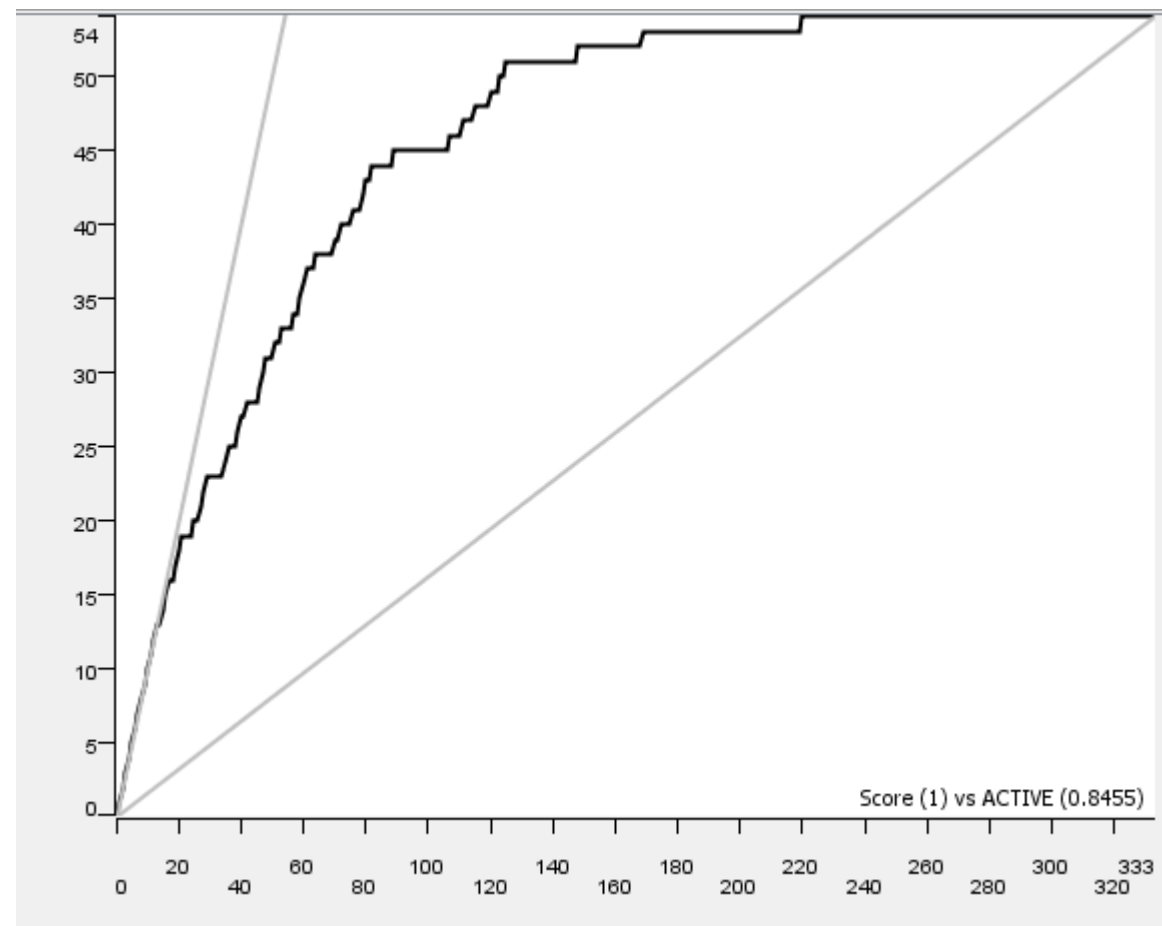

|          | Predicted Active | Predicted Inactive |
|----------|------------------|--------------------|
| Active   | 48               | 6                  |
| Inactive | 70               | 209                |

# <2.5 nM DefGood in Xa, 10% error

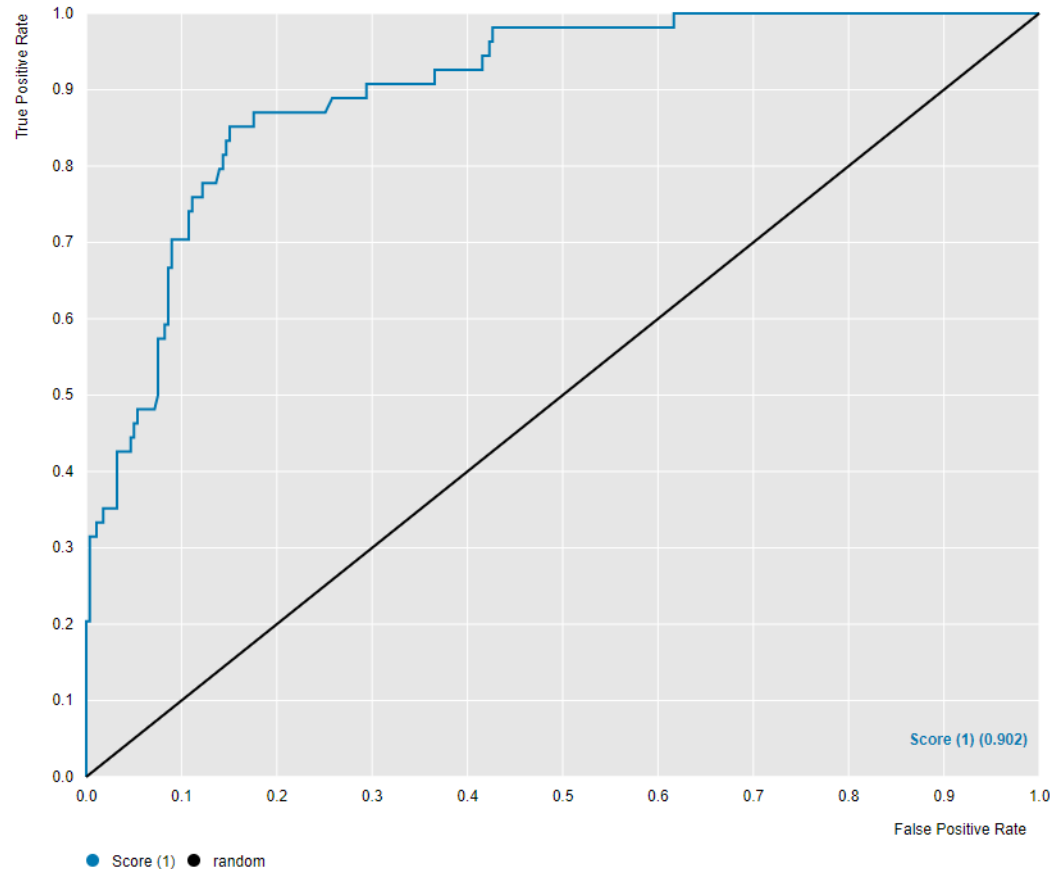

N=333

| Top 10% Mean IC50 | 6.2 nM |
|-------------------|--------|
|-------------------|--------|

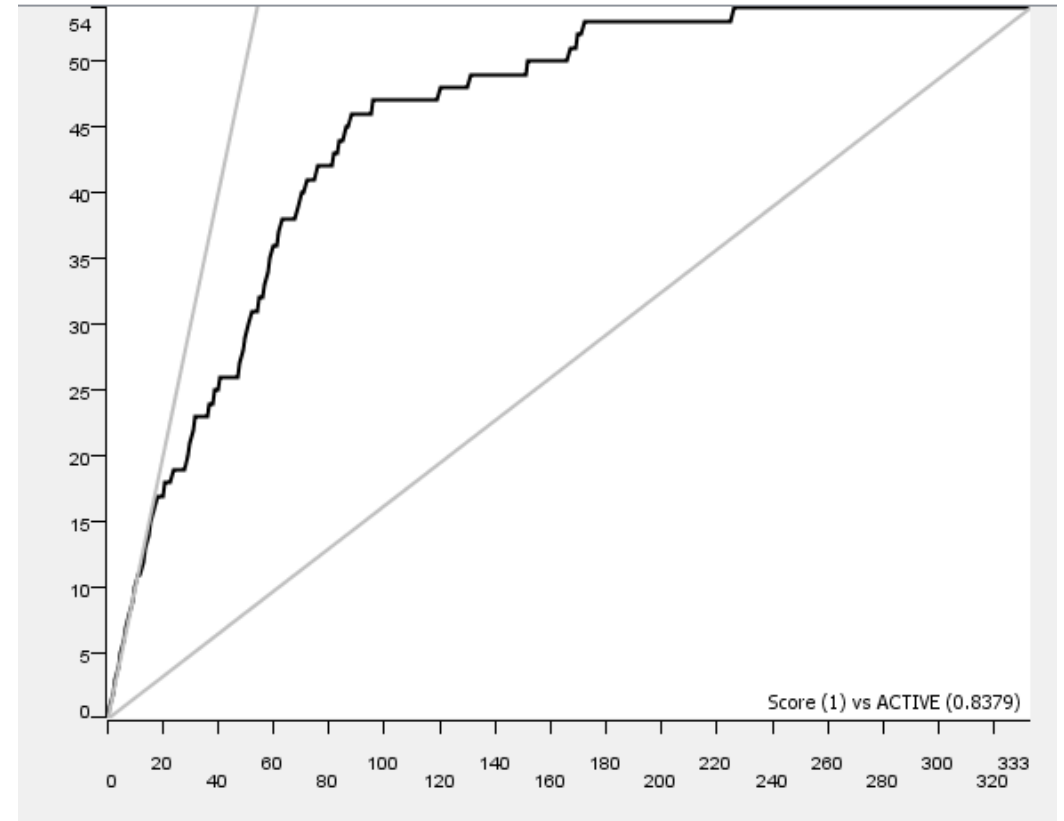

|          | Predicted Active | Predicted Inactive |
|----------|------------------|--------------------|
| Active   | 49               | 5                  |
| Inactive | 87               | 192                |

# <2.5 nM DefGood in Xa, 15% error

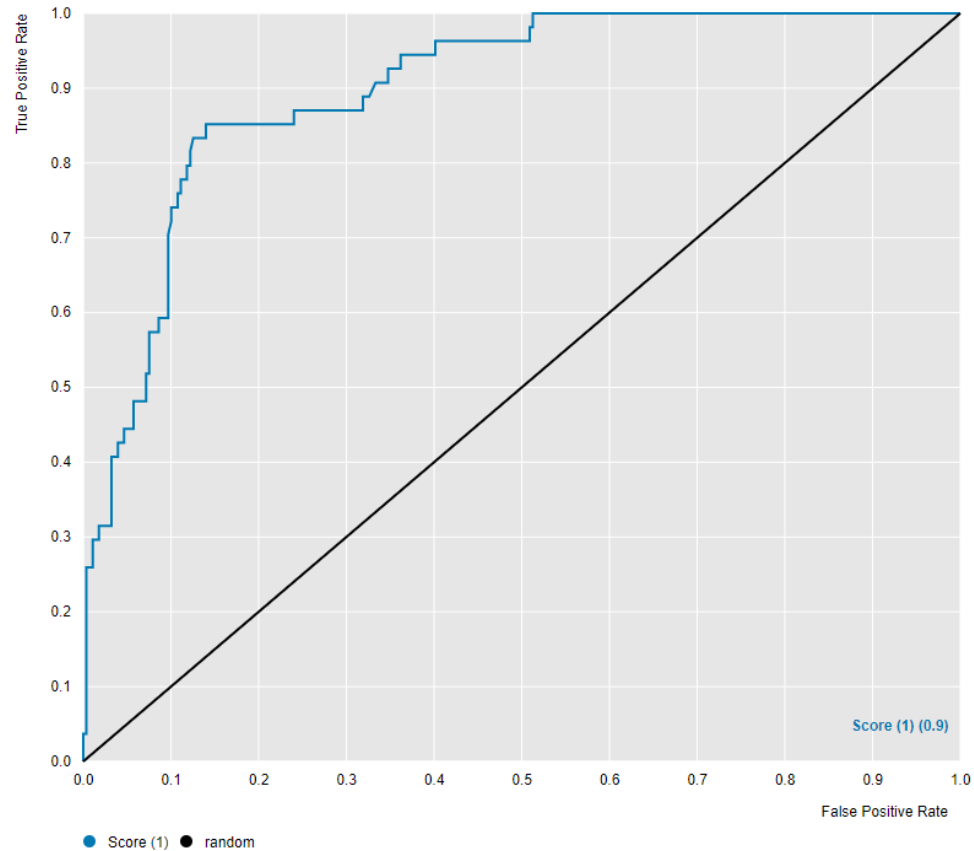

N=333

| Top 10% Mean IC50 | 5.5 nM |
|-------------------|--------|
|-------------------|--------|

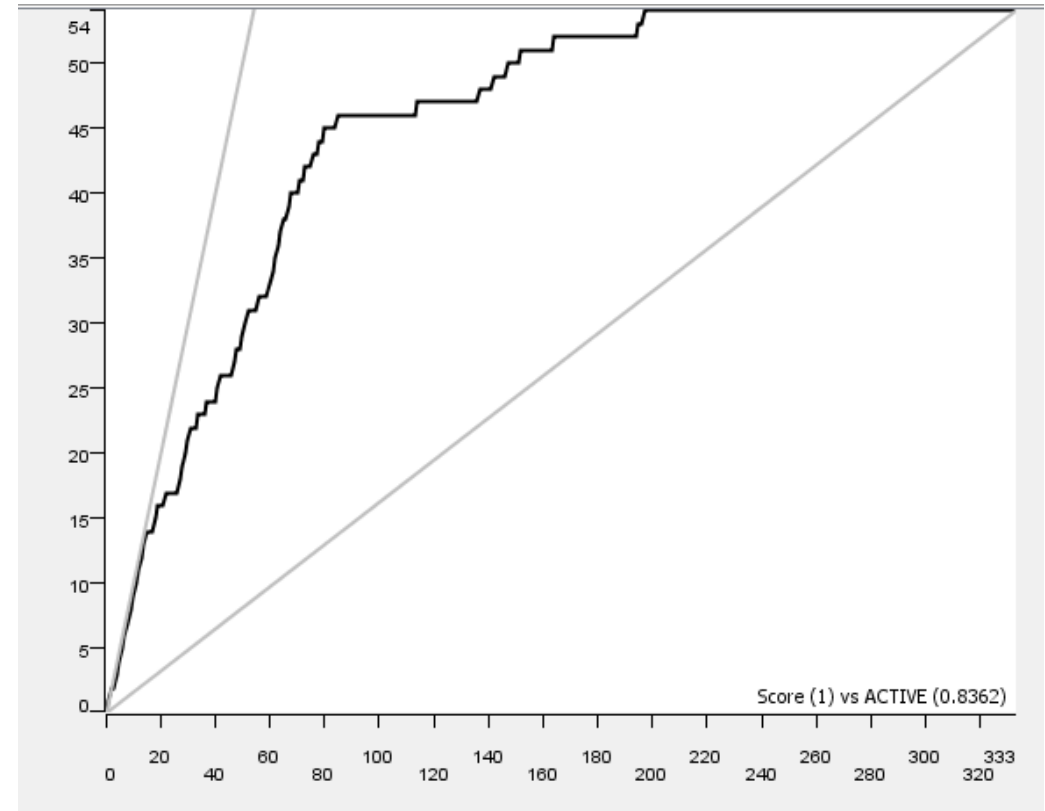

|          | Predicted Active | Predicted Inactive |
|----------|------------------|--------------------|
| Active   | 46               | 8                  |
| Inactive | 42               | 237                |

# <2.5 nM DefGood in Xa, 20% error

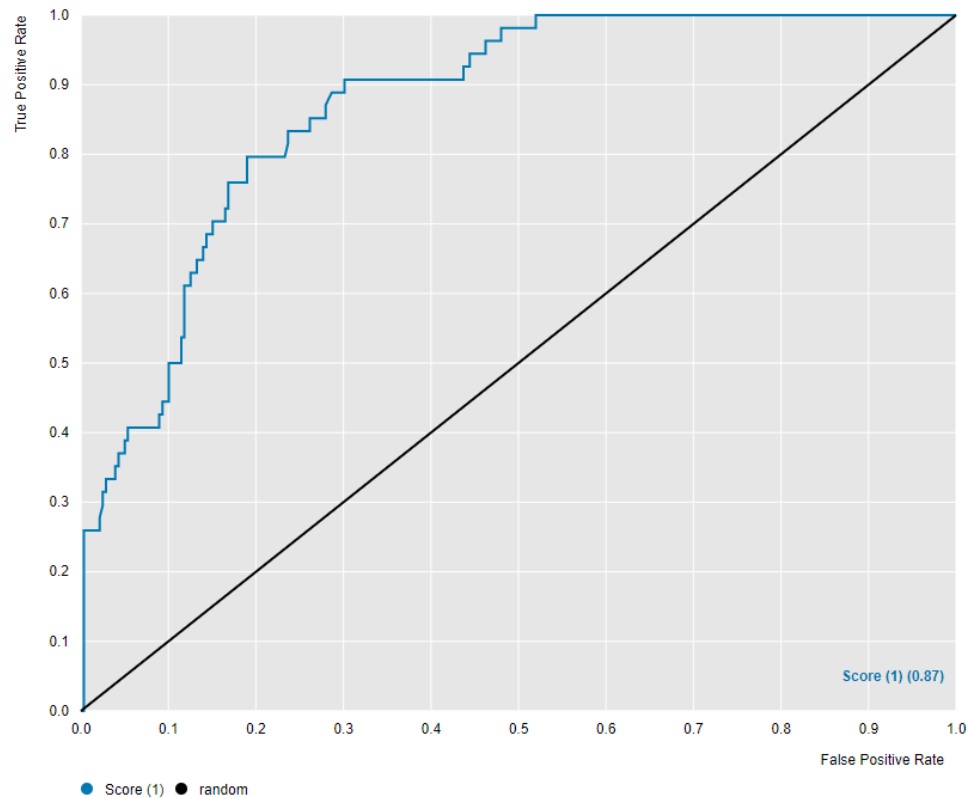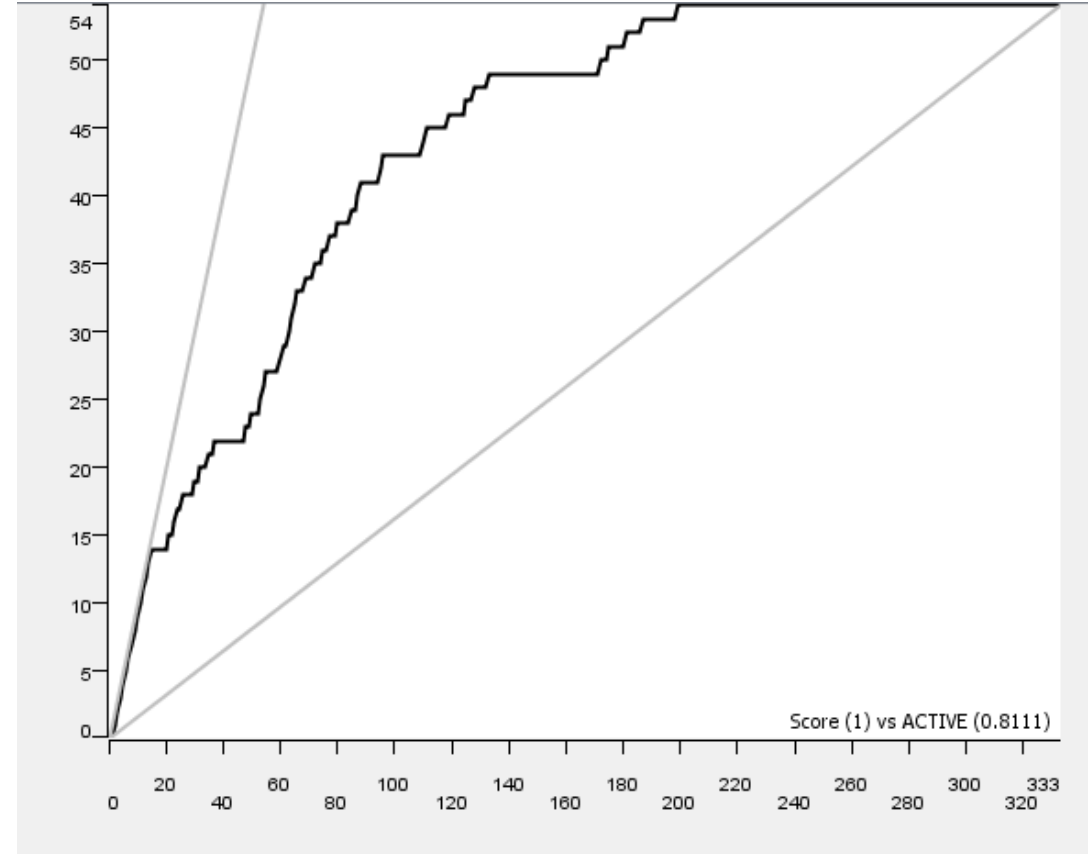

N=333

| Top 10% Mean IC50 | 5.5 nM |
|-------------------|--------|
|-------------------|--------|

|          | Predicted Active | Predicted Inactive |
|----------|------------------|--------------------|
| Active   | 37               | 17                 |
| Inactive | 40               | 239                |



# <2.5 nM DefGood in Xa, 30% error

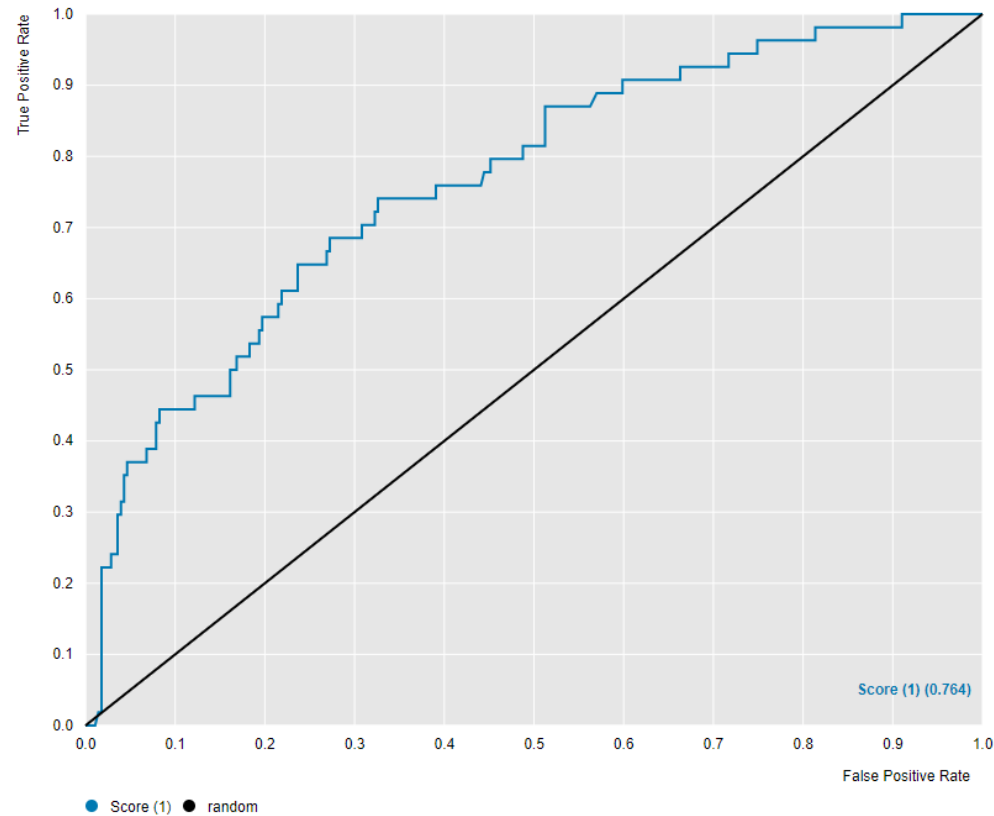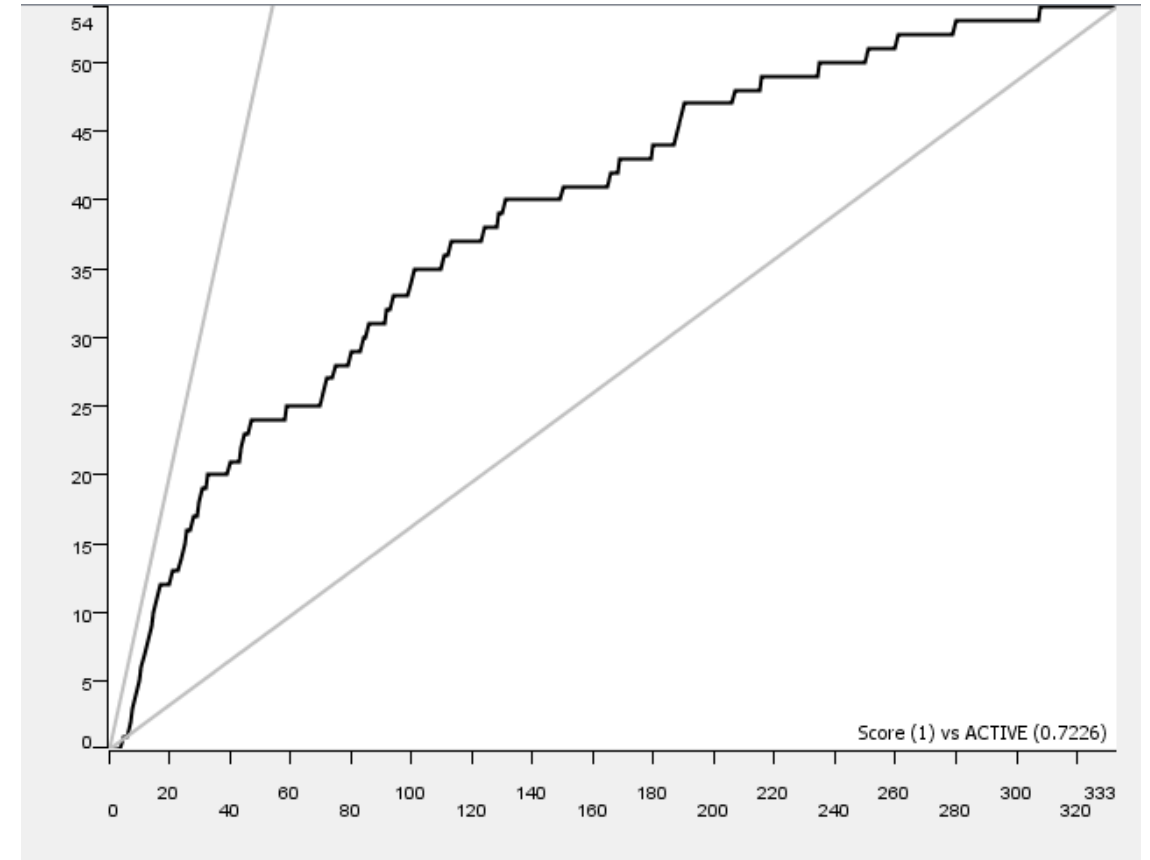

N=333

|                      |        |
|----------------------|--------|
| Top 10% Mean<br>IC50 | 9.2 nM |
|----------------------|--------|

|          | Predicted Active | Predicted Inactive |
|----------|------------------|--------------------|
| Active   | 35               | 19                 |
| Inactive | 74               | 205                |

# <2.5 nM DefGood in Xa, 35% error

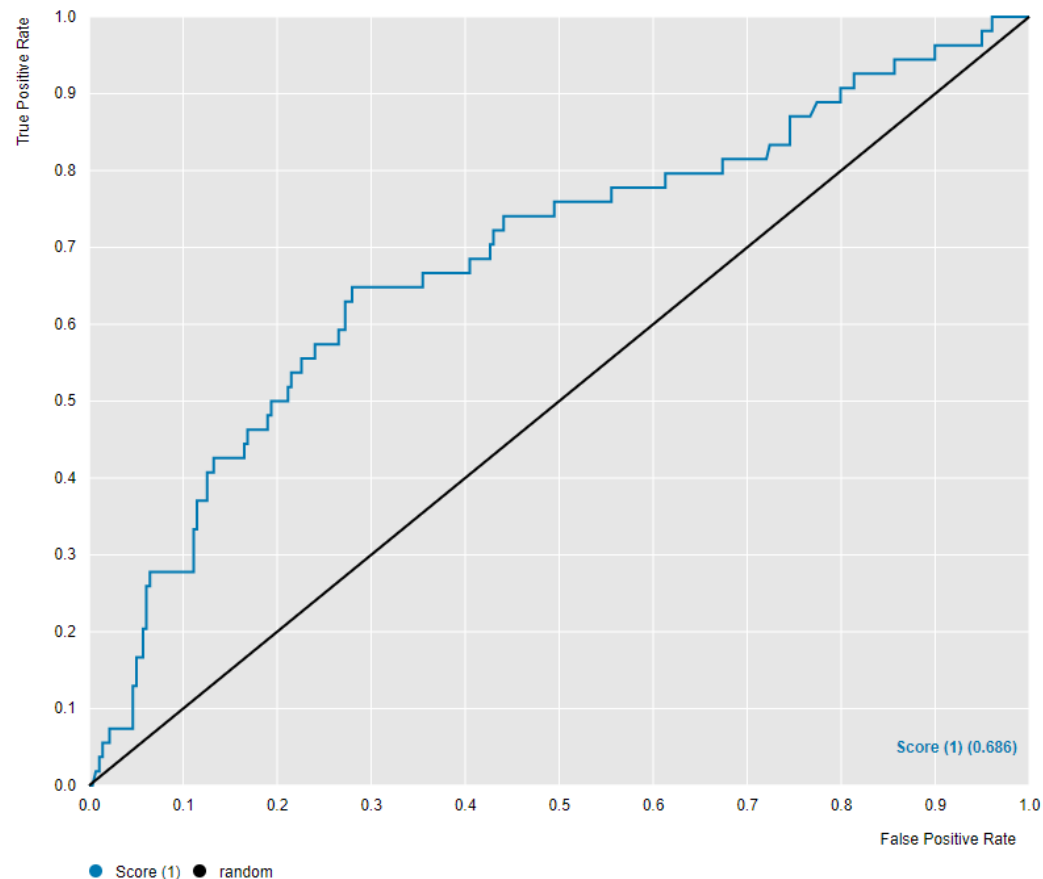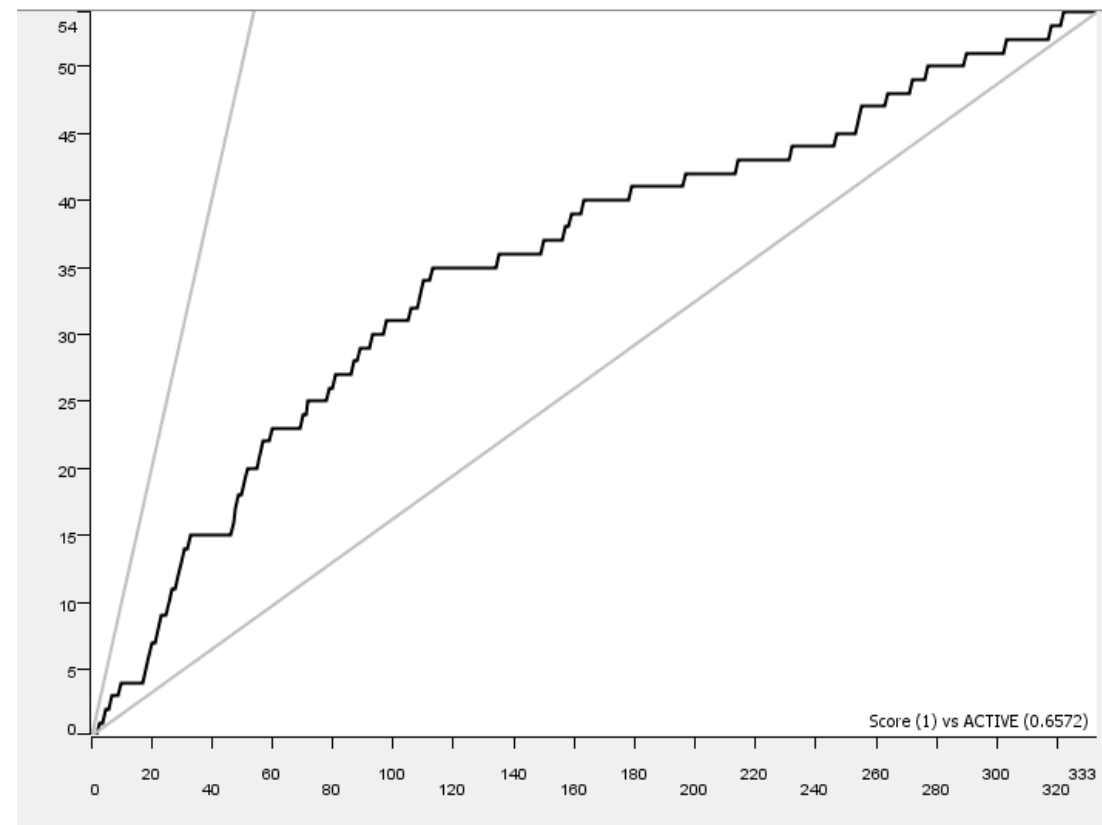

N=333

Top 10% Mean  
IC50

9,500 nM

|          | Predicted Active | Predicted Inactive |
|----------|------------------|--------------------|
| Active   | 35               | 19                 |
| Inactive | 87               | 192                |

# <2.5 nM DefGood in Xa, 40% error

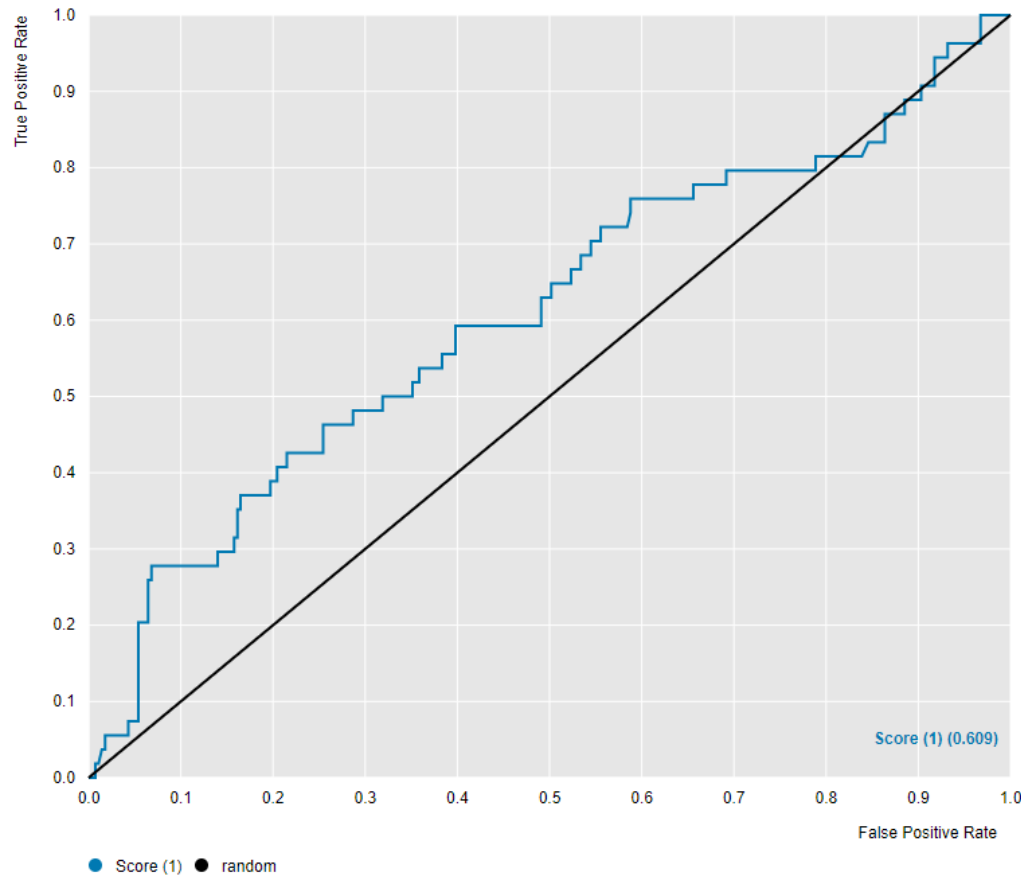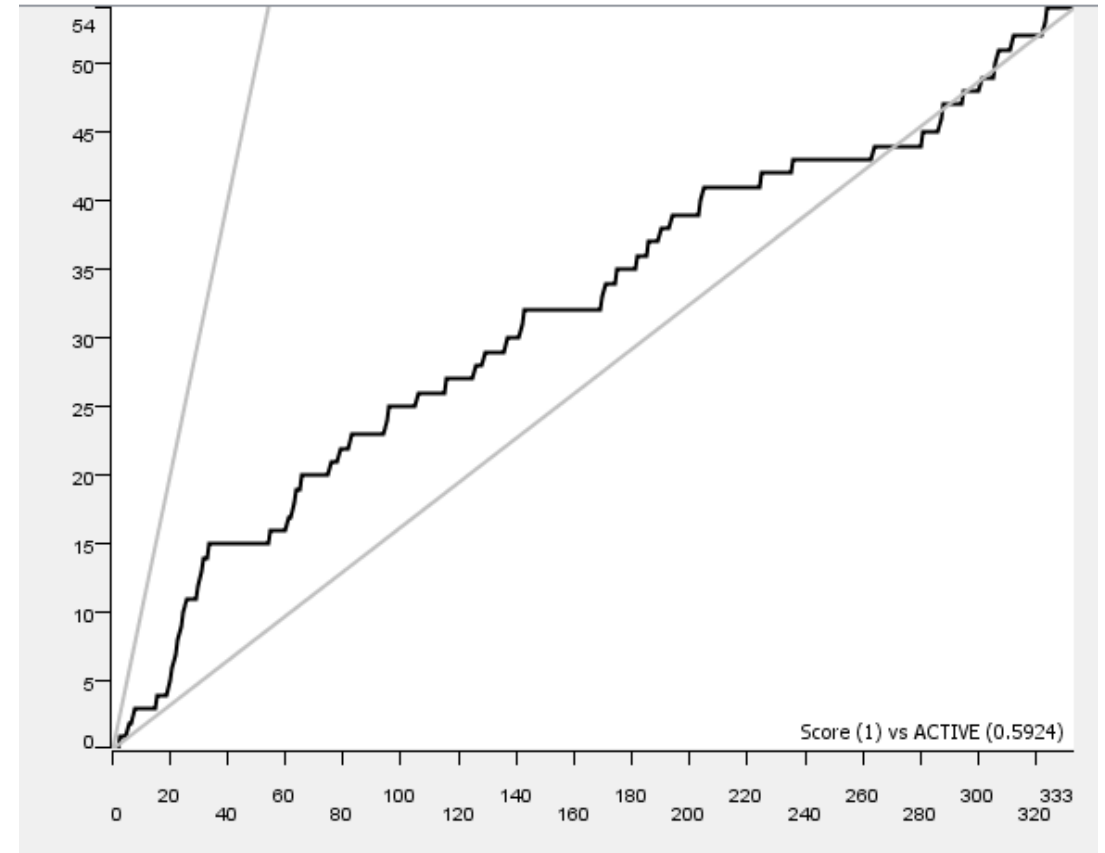

N=333

|                      |          |
|----------------------|----------|
| Top 10% Mean<br>IC50 | 6,500 Nm |
|----------------------|----------|

|          | Predicted Active | Predicted Inactive |
|----------|------------------|--------------------|
| Active   | 32               | 22                 |
| Inactive | 137              | 142                |

<2.5 nM DefGood in Xa, 10% error; Random seed = 429

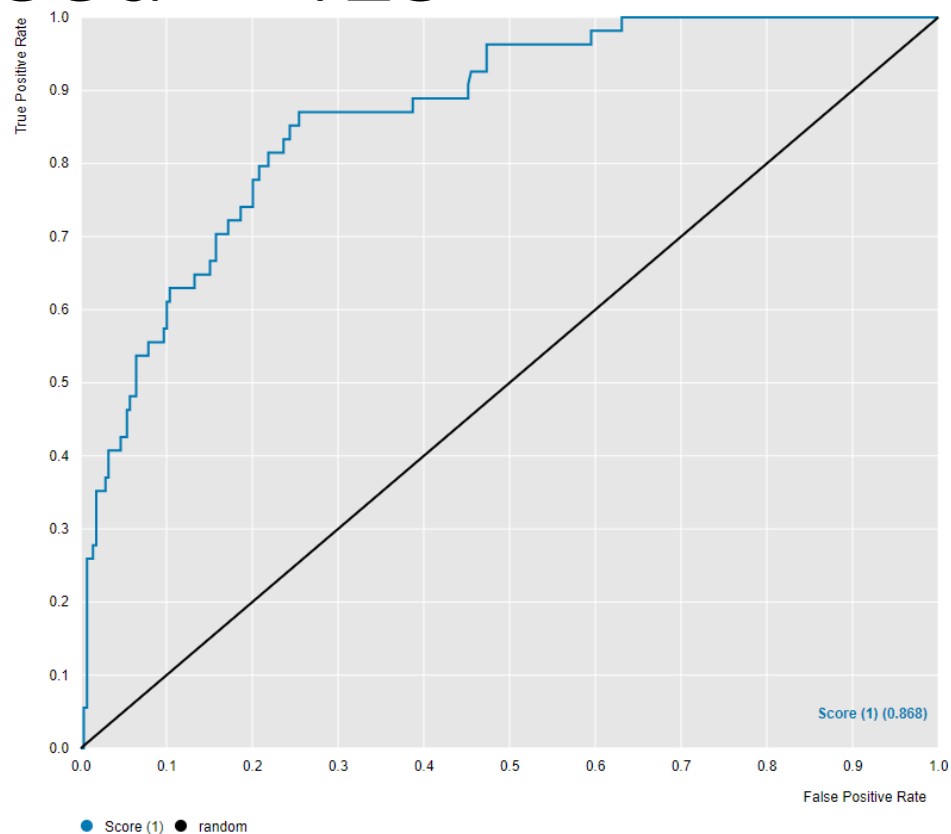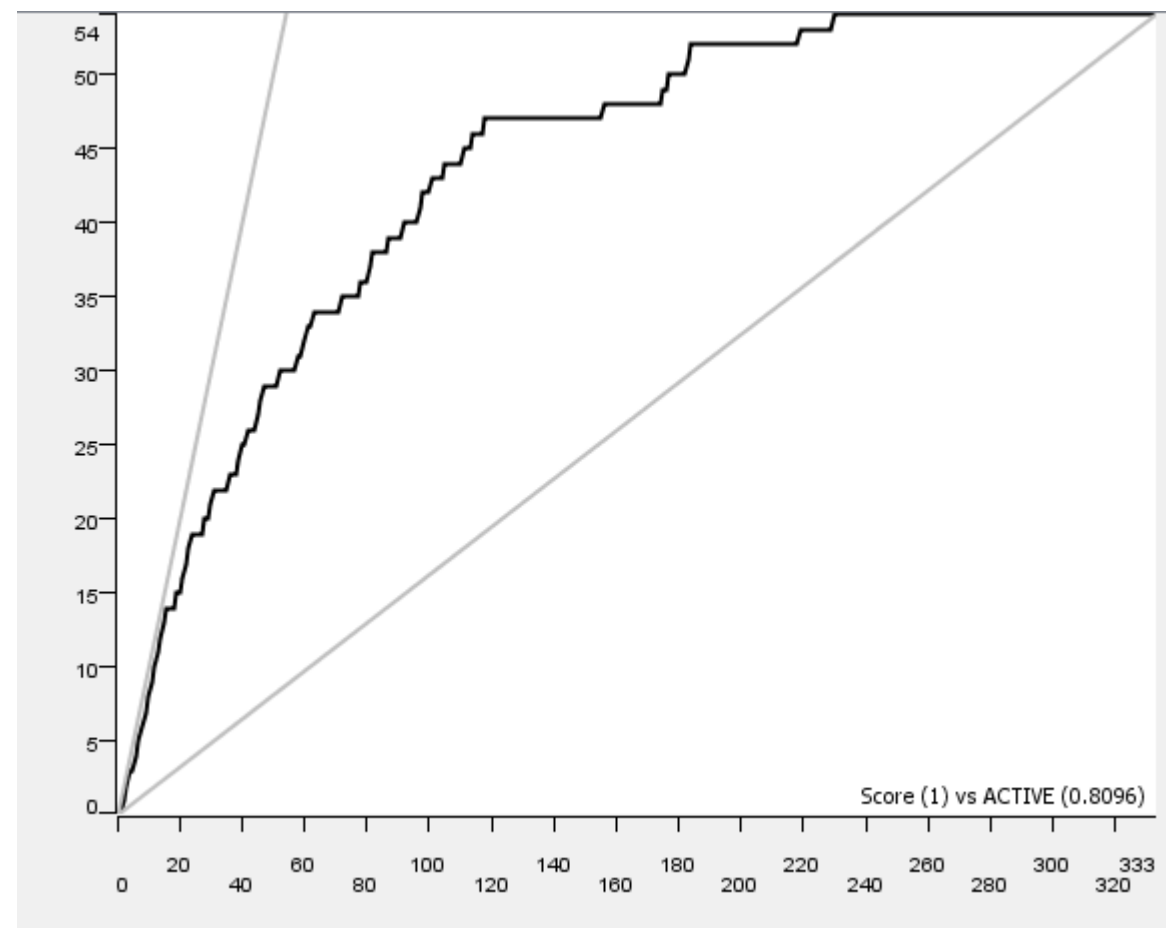

N=333

Top 10% Mean  
IC50

8.2 nM

|          | Predicted Active | Predicted Inactive |
|----------|------------------|--------------------|
| Active   | 45               | 9                  |
| Inactive | 67               | 212                |

<2.5 nM DefGood in Xa, 20% error; Random seed = 429

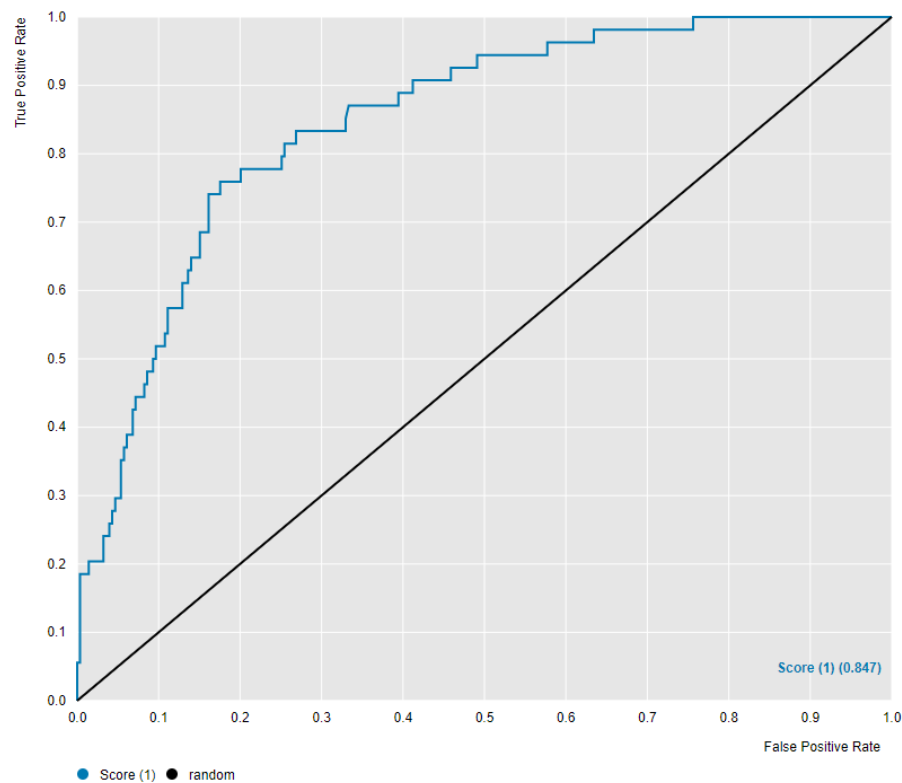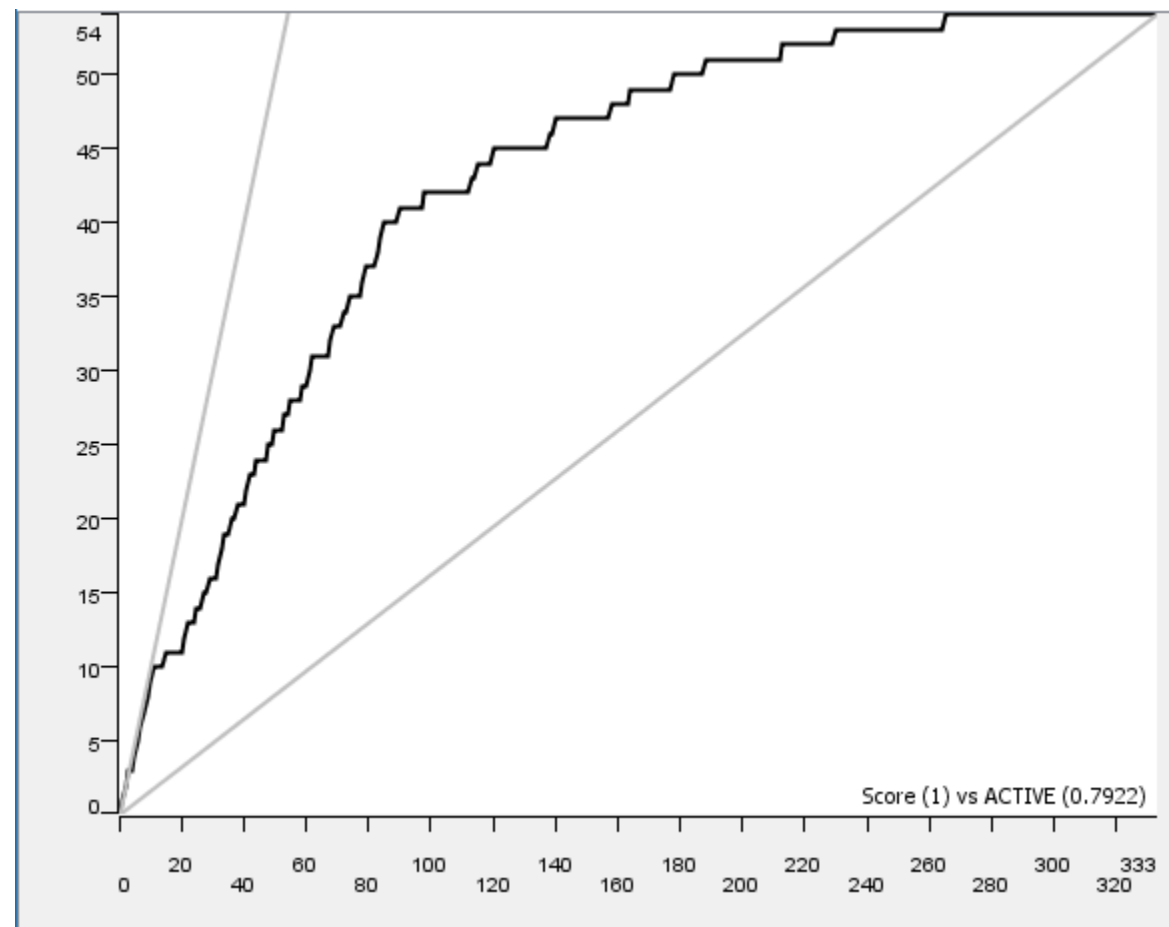

N=333

| Top 10% Mean IC50 | 9.1 |
|-------------------|-----|
|-------------------|-----|

|          | Predicted Active | Predicted Inactive |
|----------|------------------|--------------------|
| Active   | 45               | 9                  |
| Inactive | 78               | 201                |

<2.5 nM DefGood in Xa, 30% error; Random seed = 429

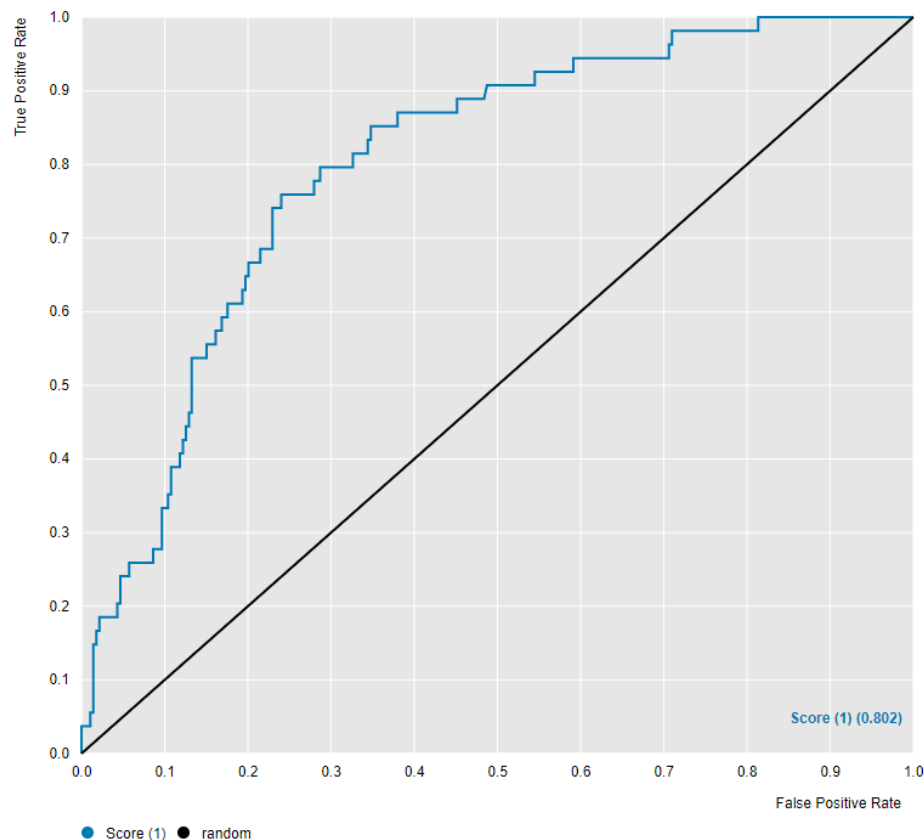

N=333

|                      |        |
|----------------------|--------|
| Top 10% Mean<br>IC50 | 9.3 nM |
|----------------------|--------|

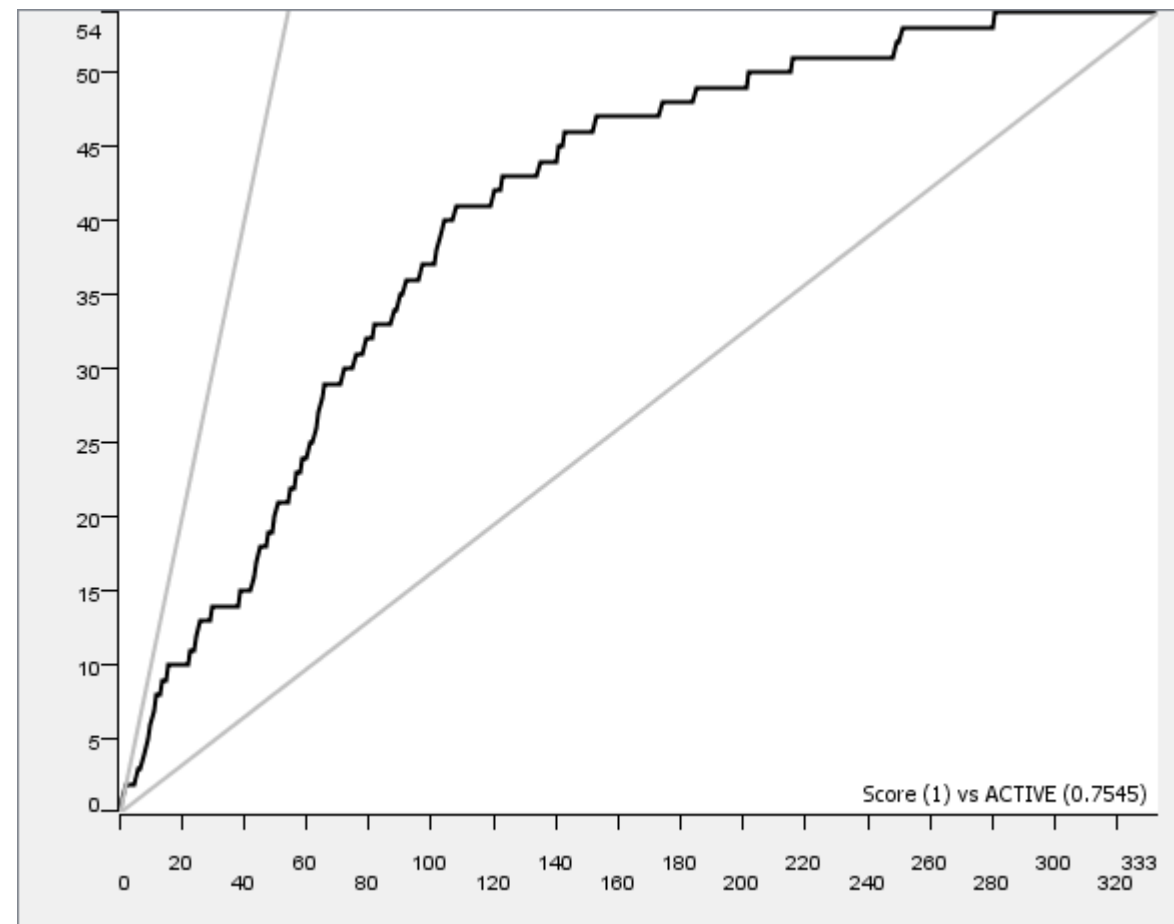

|          | Predicted Active | Predicted Inactive |
|----------|------------------|--------------------|
| Active   | 51               | 3                  |
| Inactive | 175              | 104                |

<2.5 nM DefGood in Xa, 35% error; Random seed = 429

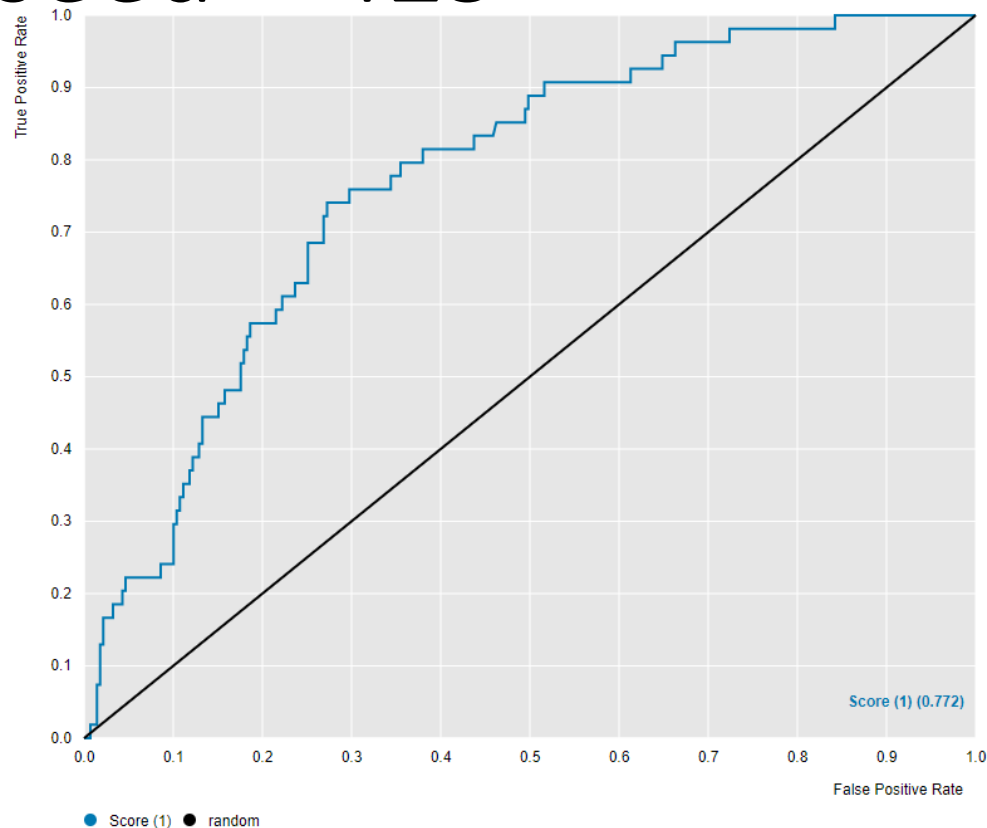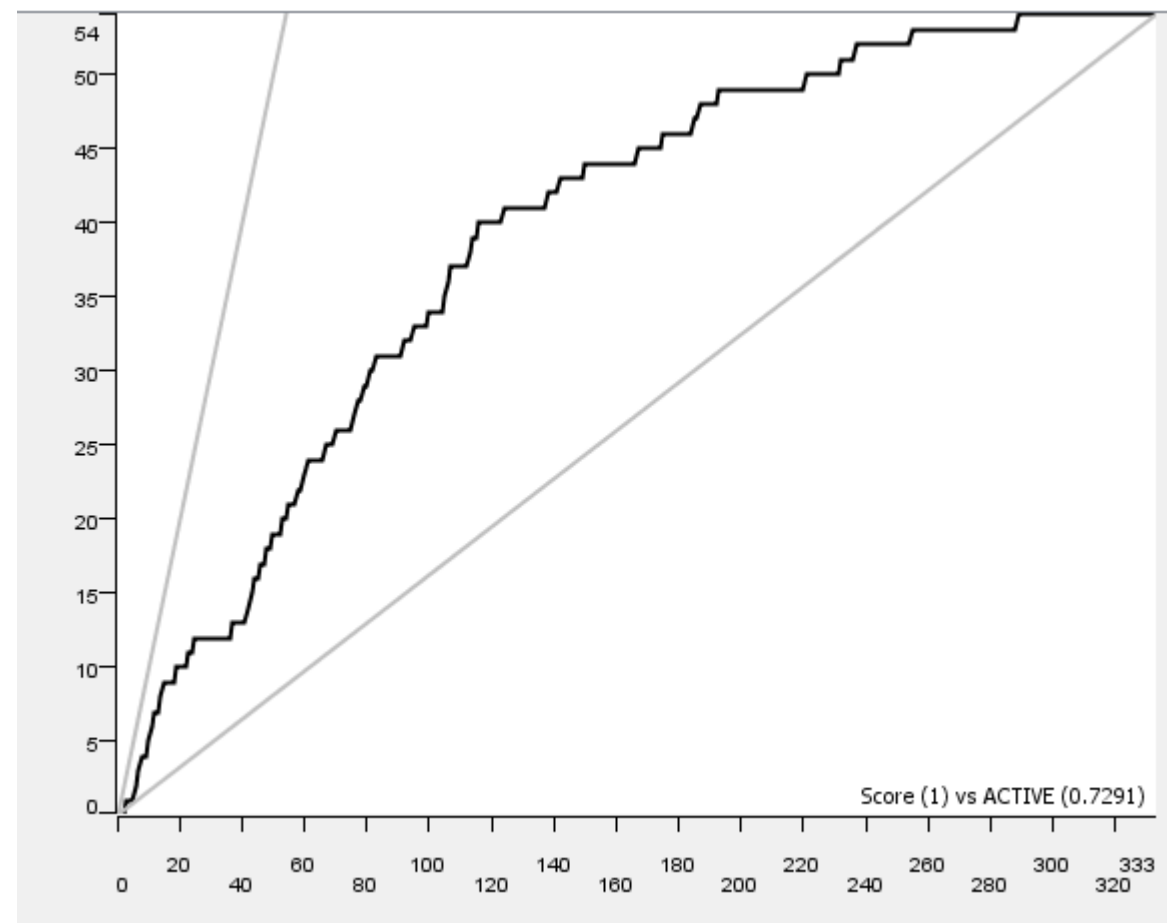

N=333

|                   |                                            |
|-------------------|--------------------------------------------|
| Top 10% Mean IC50 | 20.7 nM<br>No mistakes greater than 200 nM |
|-------------------|--------------------------------------------|

|          | Predicted Active | Predicted Inactive |
|----------|------------------|--------------------|
| Active   | 33               | 21                 |
| Inactive | 65               | 214                |

<2.5 nM DefGood in Xa, 40% error; Random seed = 429

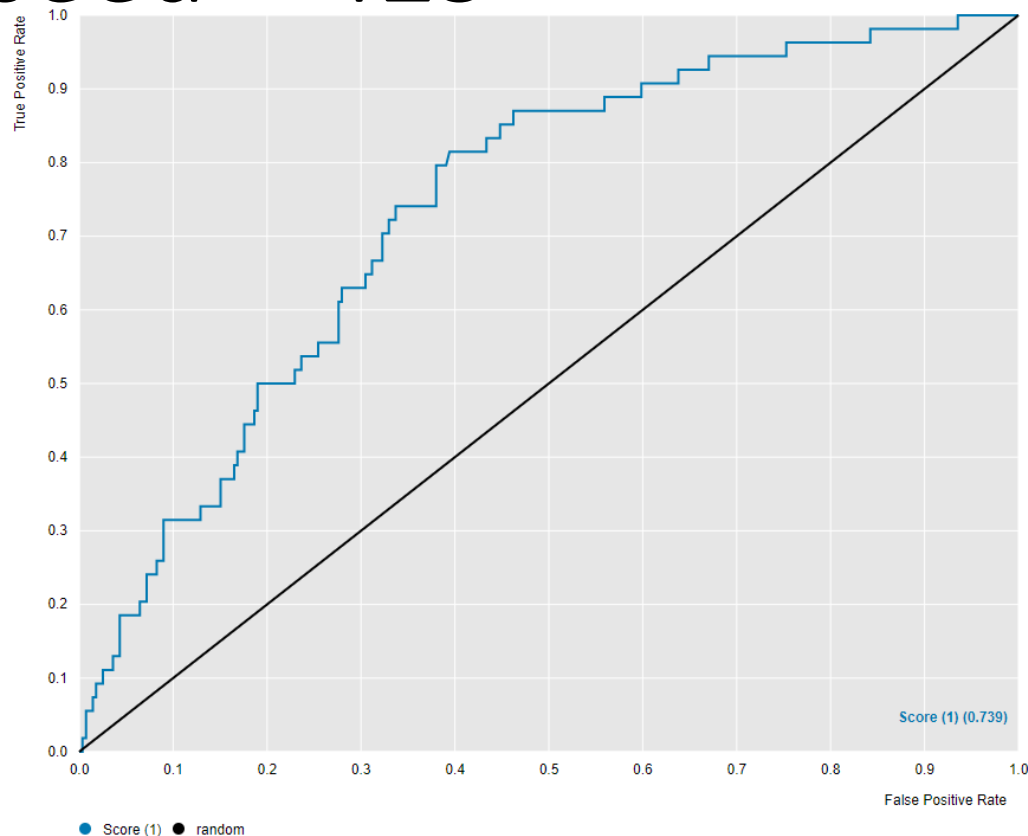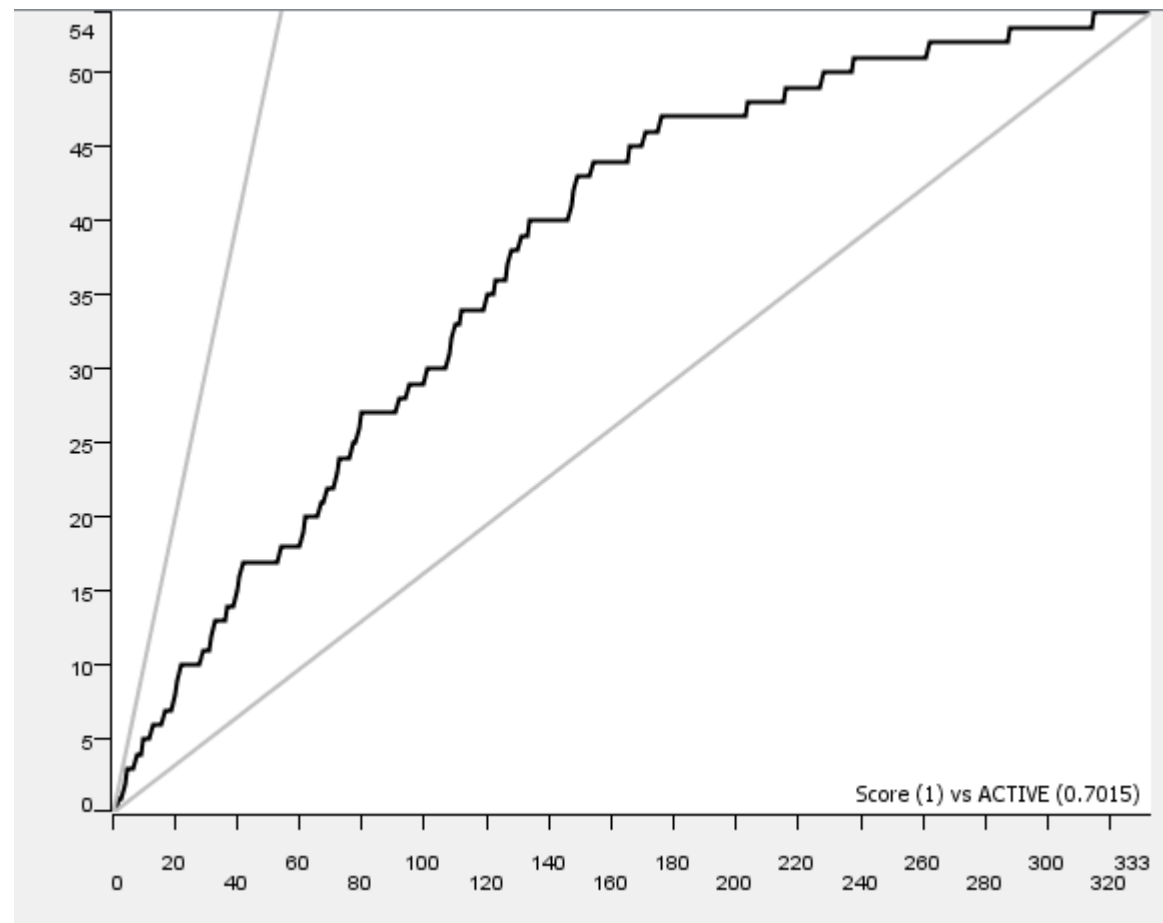

N=333

|                   |         |
|-------------------|---------|
| Top 10% Mean IC50 | 12.1 nM |
|-------------------|---------|

|          | Predicted Active | Predicted Inactive |
|----------|------------------|--------------------|
| Active   | 32               | 22                 |
| Inactive | 77               | 202                |



<2.5 nM DefGood in Xa, 45% error; Random seed = 429

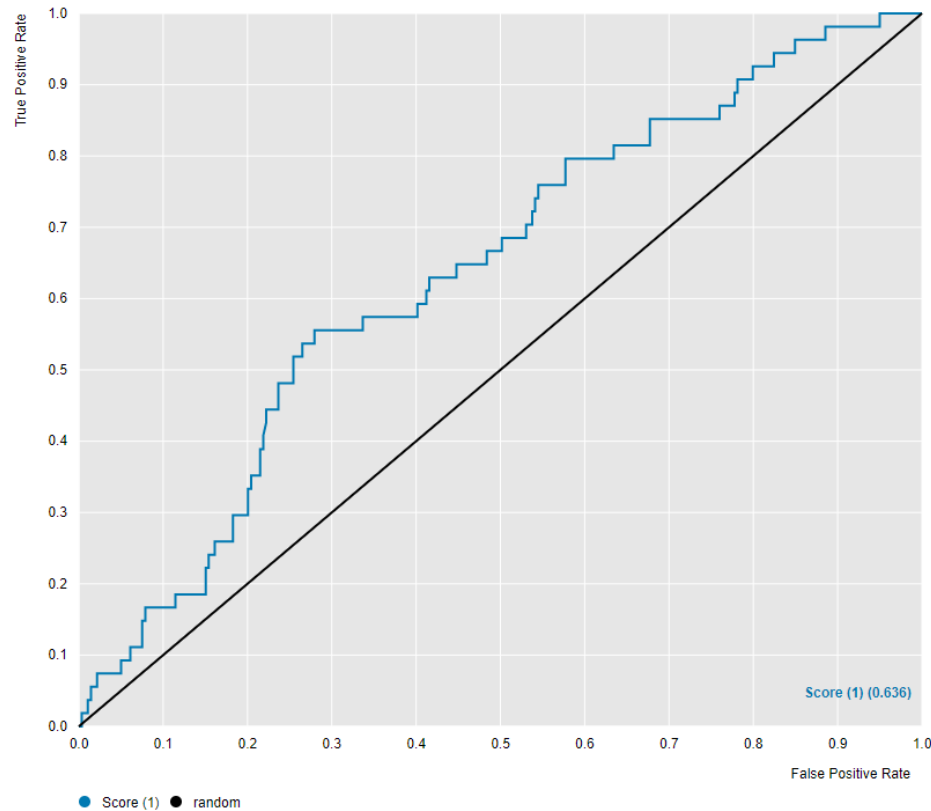

N=333

Top 10% Mean  
IC50

110 nM  
Several severe  
mistakes

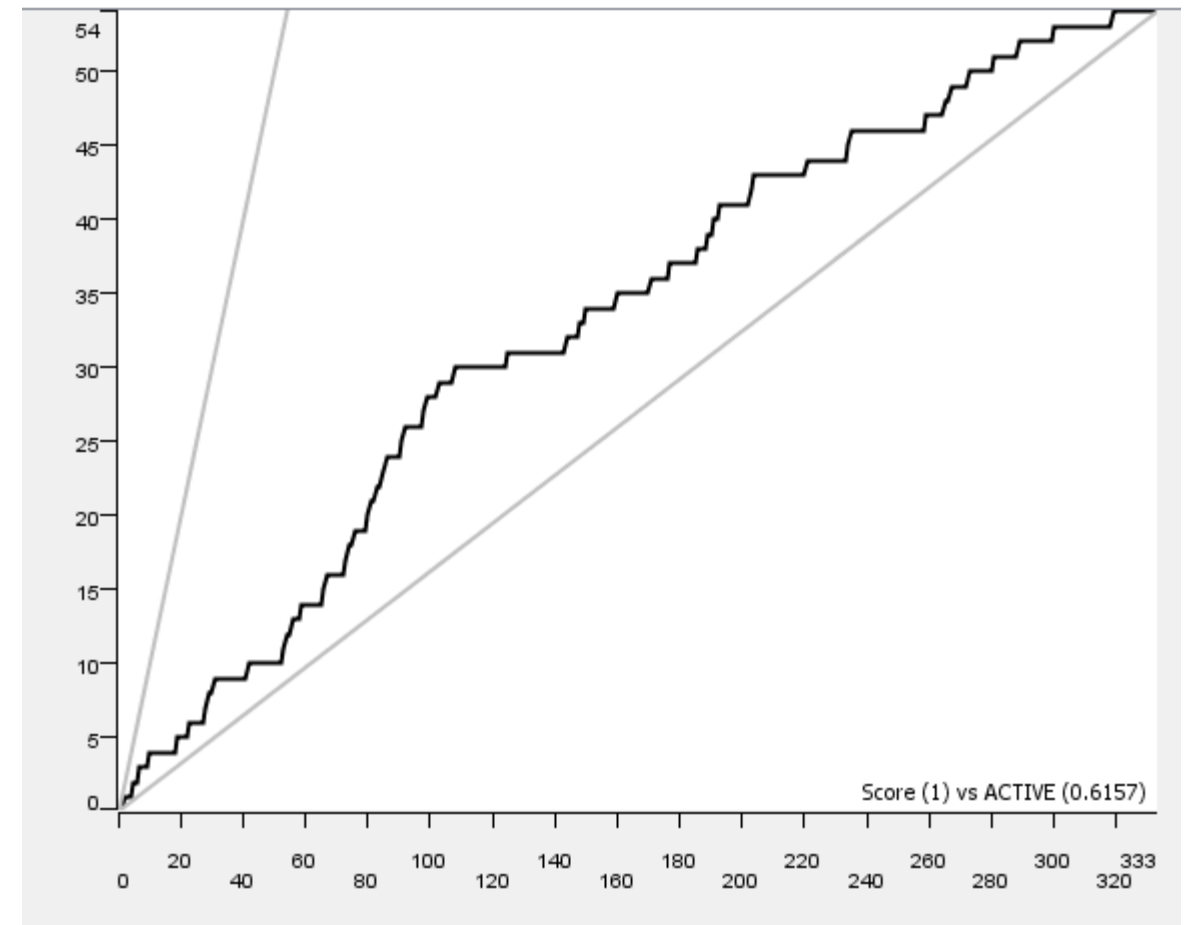

|          | Predicted Active | Predicted Inactive |
|----------|------------------|--------------------|
| Active   | 32               | 22                 |
| Inactive | 115              | 164                |

<2.5 nM DefGood in Xa, 10% error; Random seed = 121783

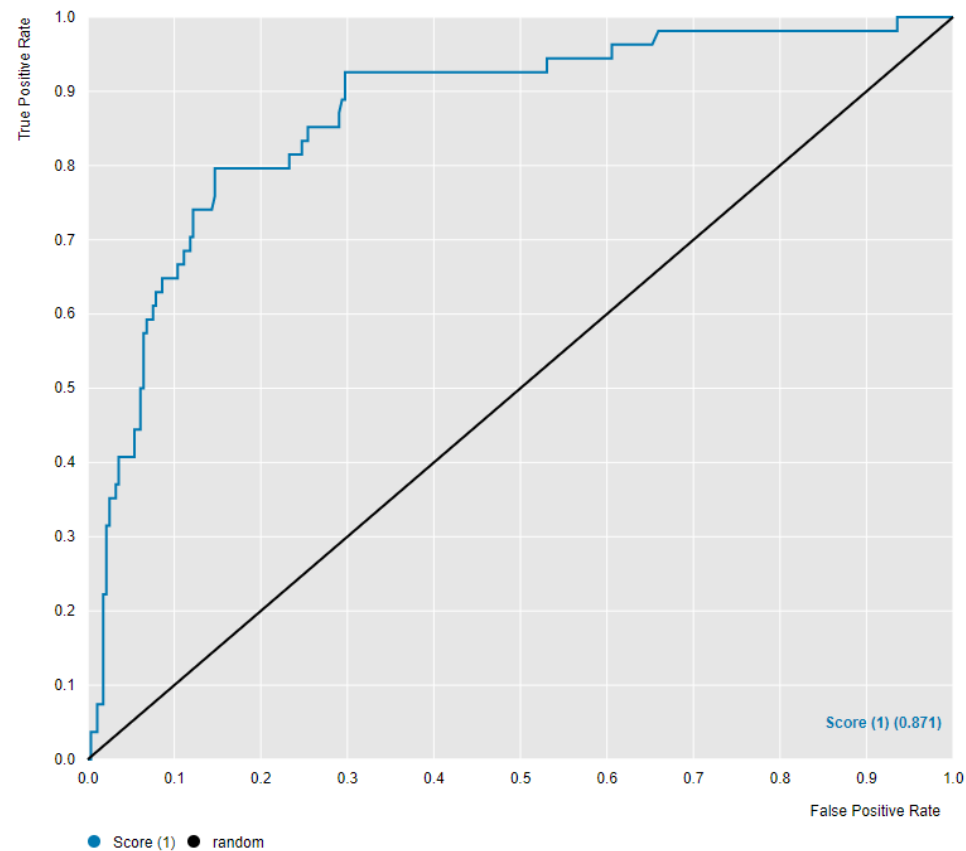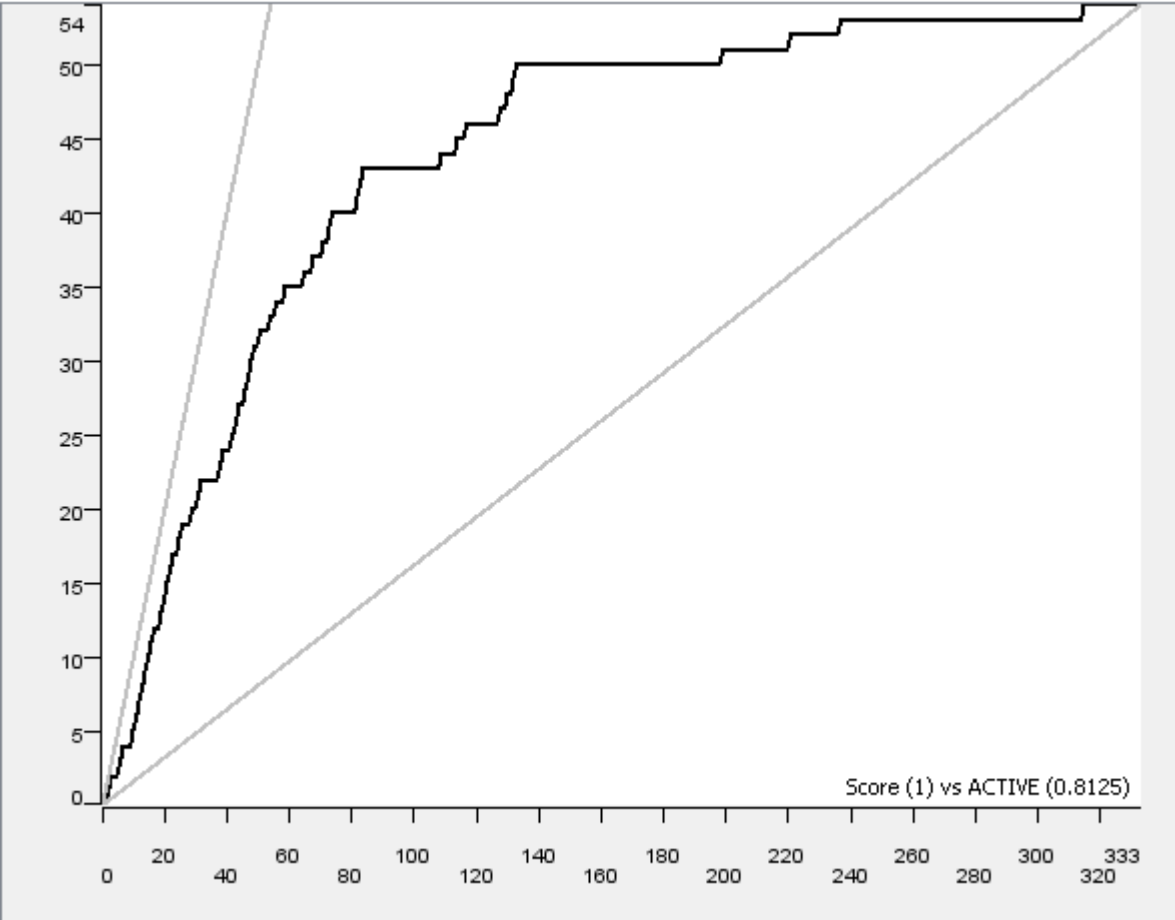

N=333

|                   |        |
|-------------------|--------|
| Top 10% Mean IC50 | 5.9 nM |
|-------------------|--------|

|          | Predicted Active | Predicted Inactive |
|----------|------------------|--------------------|
| Active   | 40               | 14                 |
| Inactive | 35               | 244                |

<2.5 nM DefGood in Xa, 20% error; Random seed = 121783

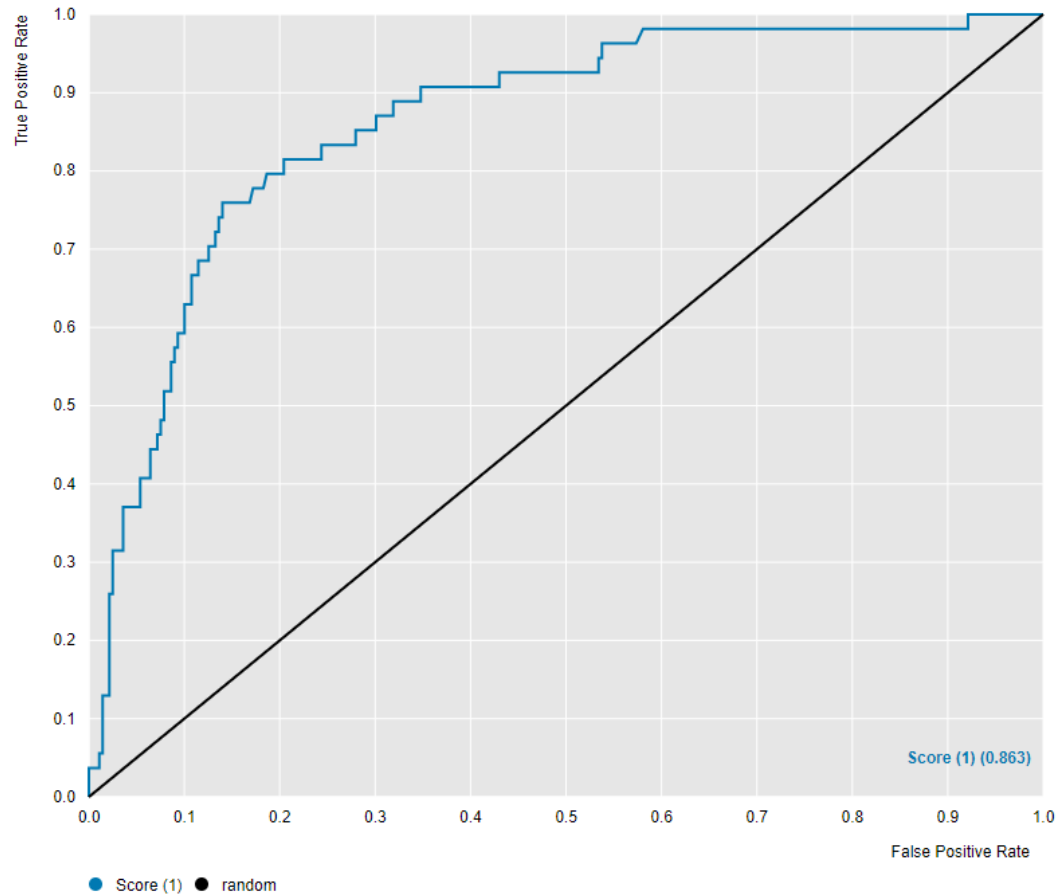

N=333

| Top 10% Mean IC50 | 10.0 nM |
|-------------------|---------|
|-------------------|---------|

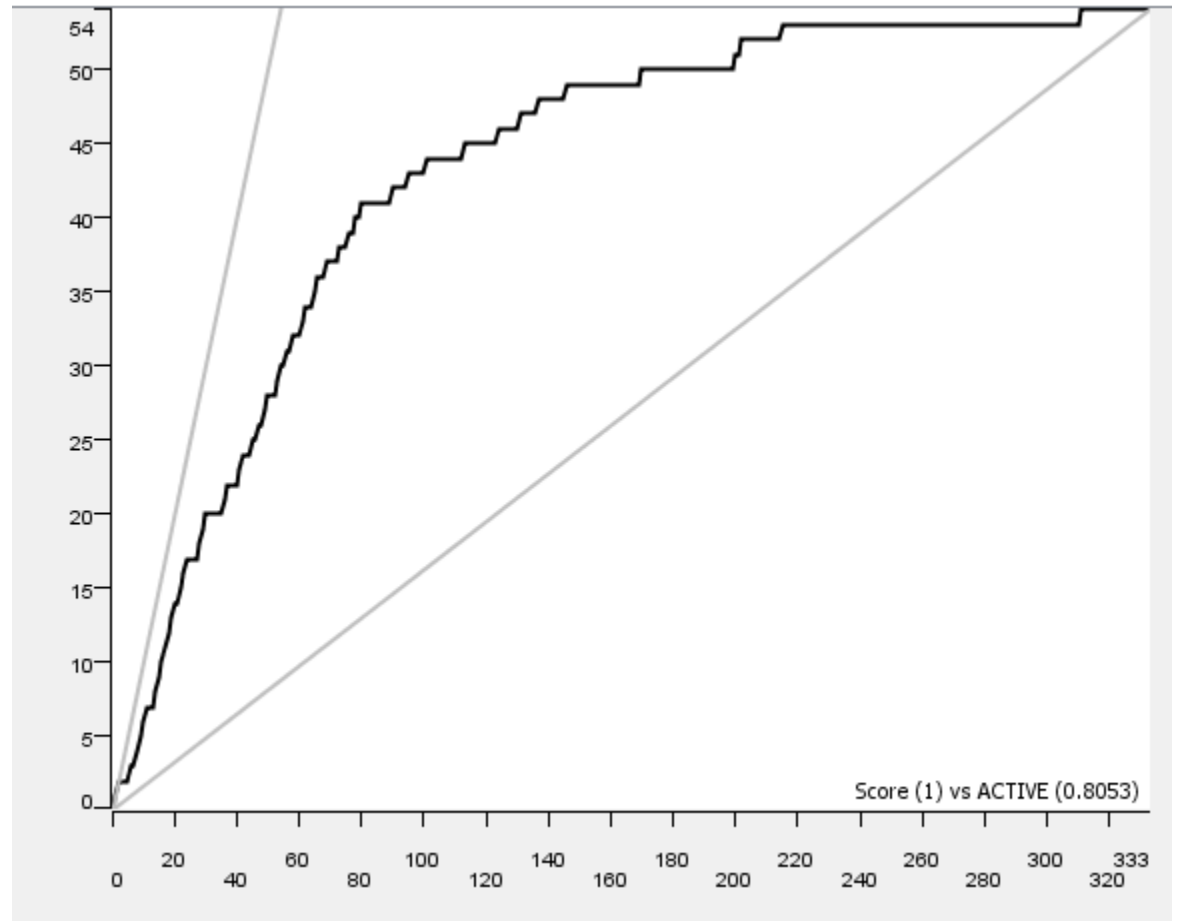

|          | Predicted Active | Predicted Inactive |
|----------|------------------|--------------------|
| Active   | 39               | 15                 |
| Inactive | 37               | 242                |

<2.5 nM DefGood in Xa, 35% error; Random seed = 121783

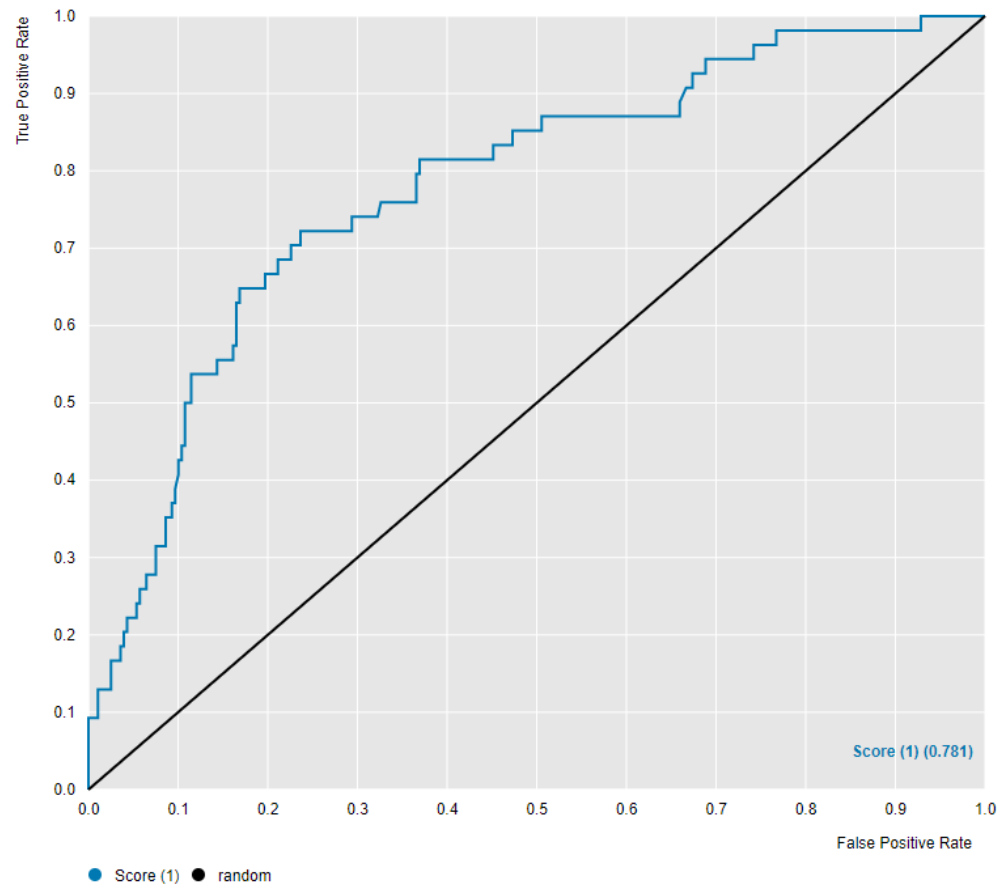

N=333

|                   |                                   |
|-------------------|-----------------------------------|
| Top 10% Mean IC50 | 40.0 nM<br>(One mistake - 930 nM) |
|-------------------|-----------------------------------|

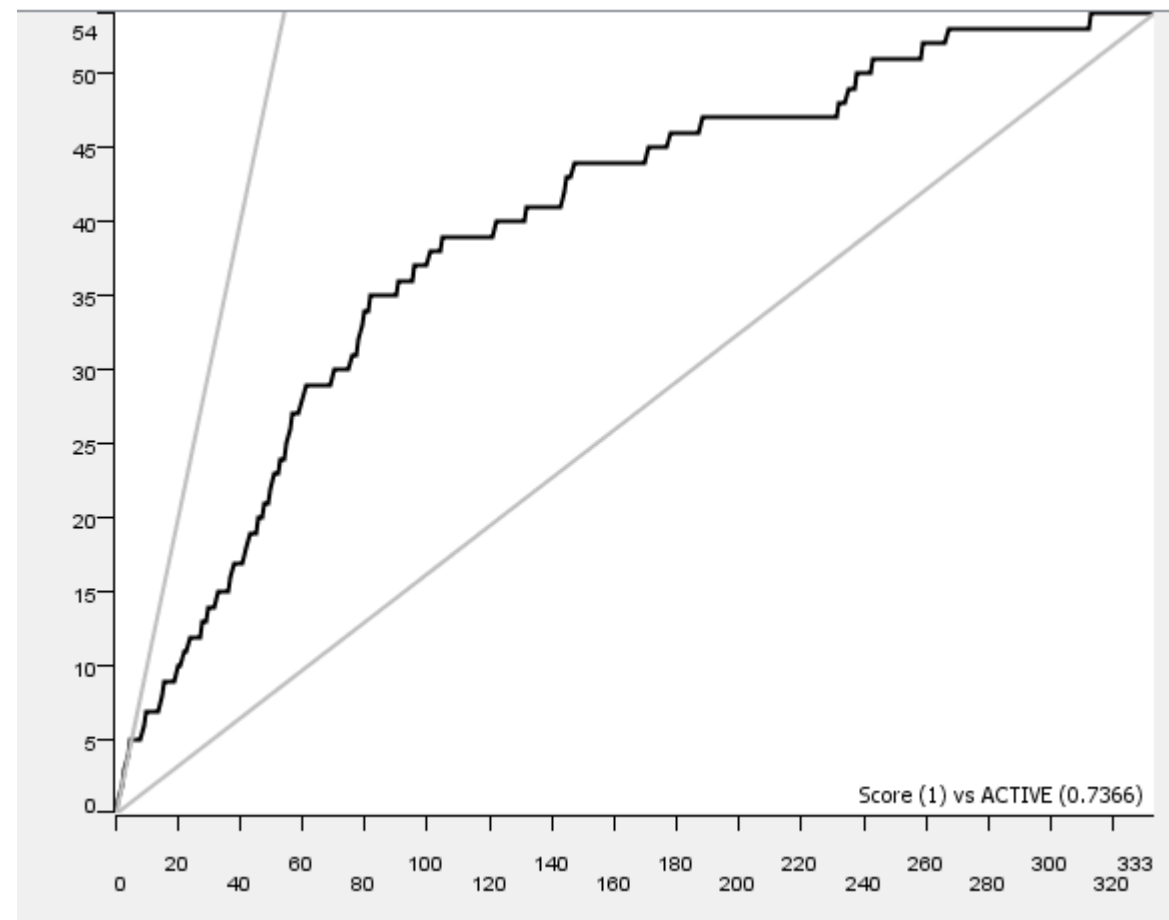

|          | Predicted Active | Predicted Inactive |
|----------|------------------|--------------------|
| Active   | 47               | 7                  |
| Inactive | 152              | 127                |

<2.5 nM DefGood in Xa, 40% error; Random seed = 121783

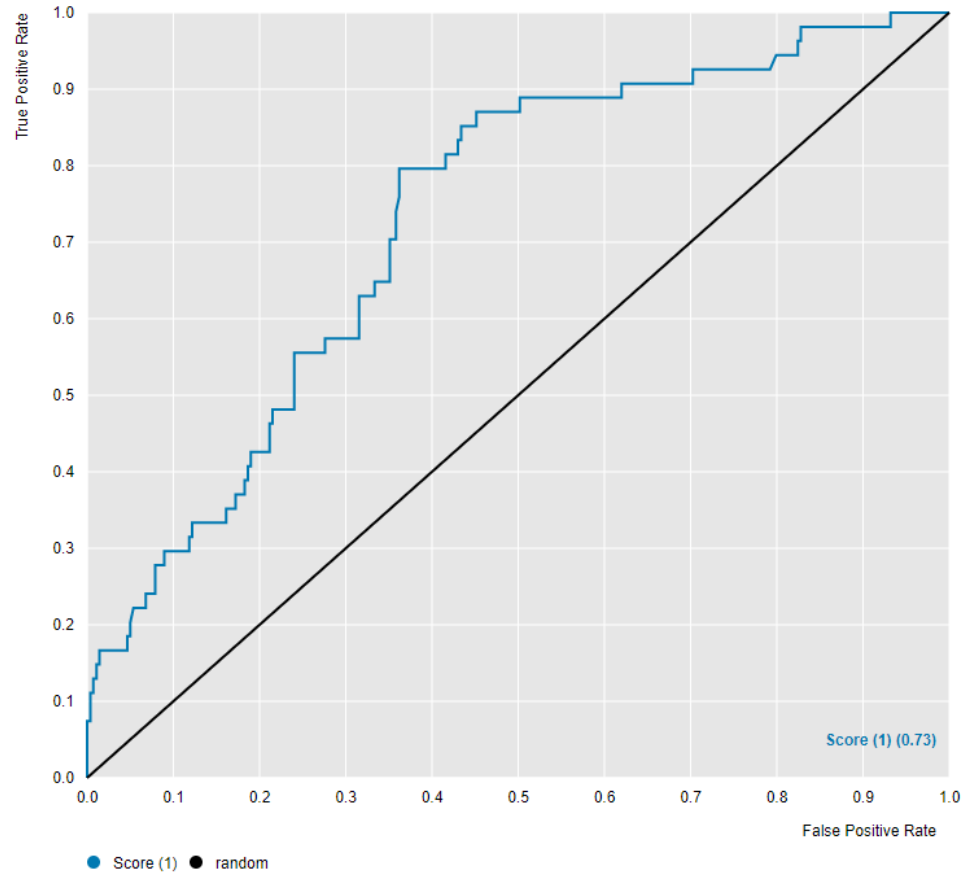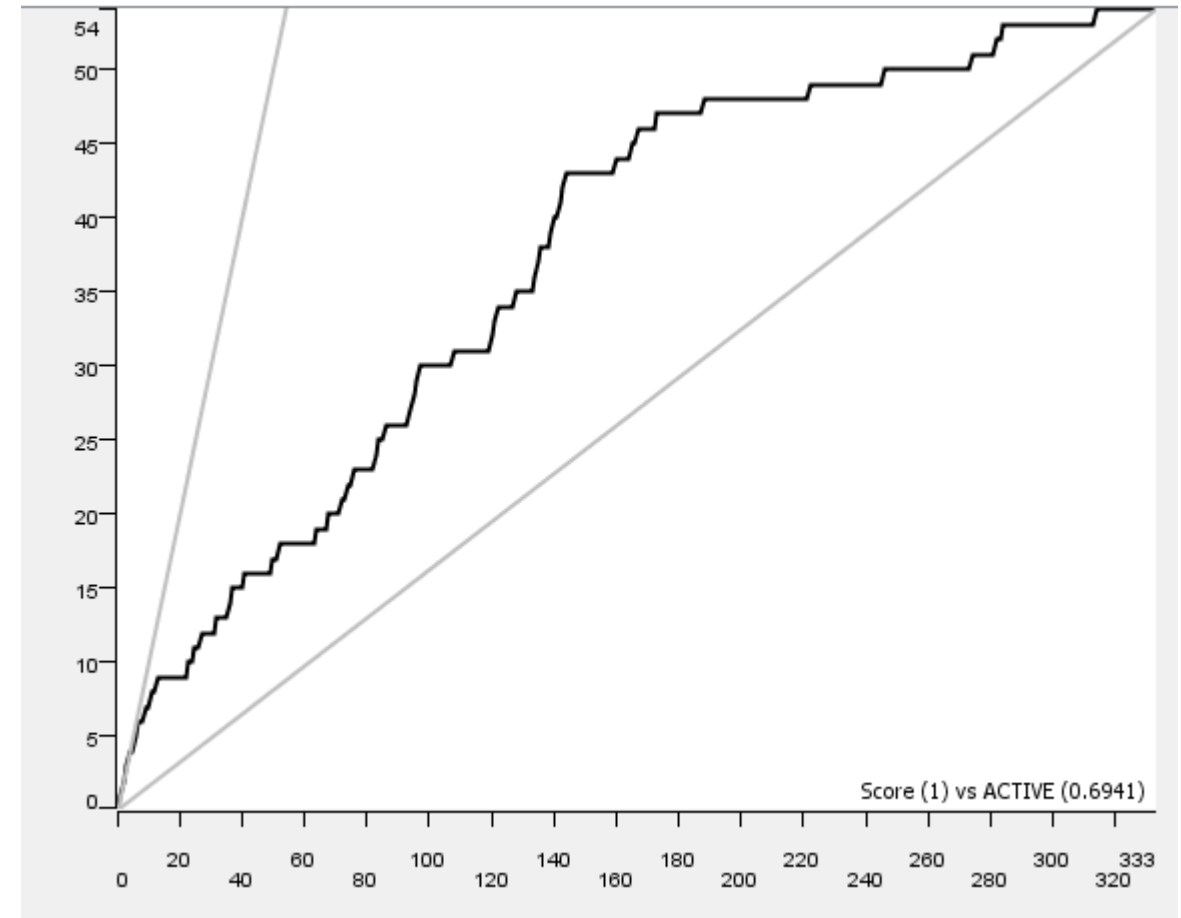

N=333

Top 10% Mean  
IC50

43.5 nM  
(One mistake -  
930 nM)

|          | Predicted Active | Predicted Inactive |
|----------|------------------|--------------------|
| Active   | 34               | 20                 |
| Inactive | 89               | 190                |

<2.5 nM DefGood in Xa, 45% error; Random seed = 121783

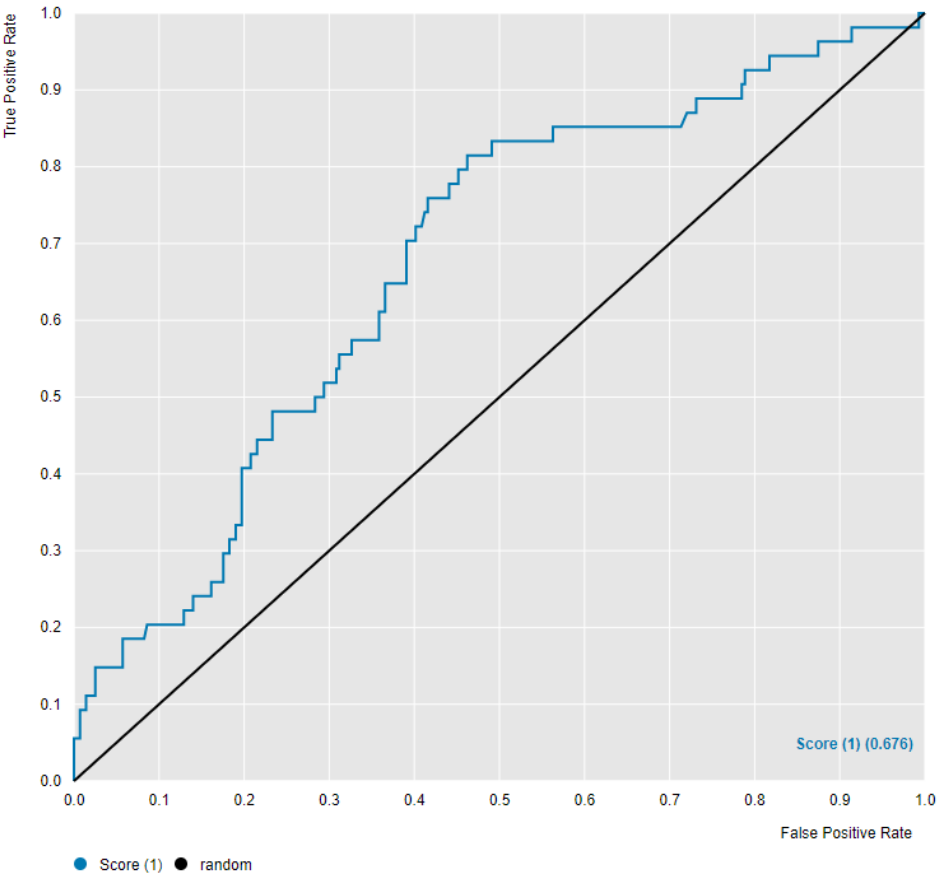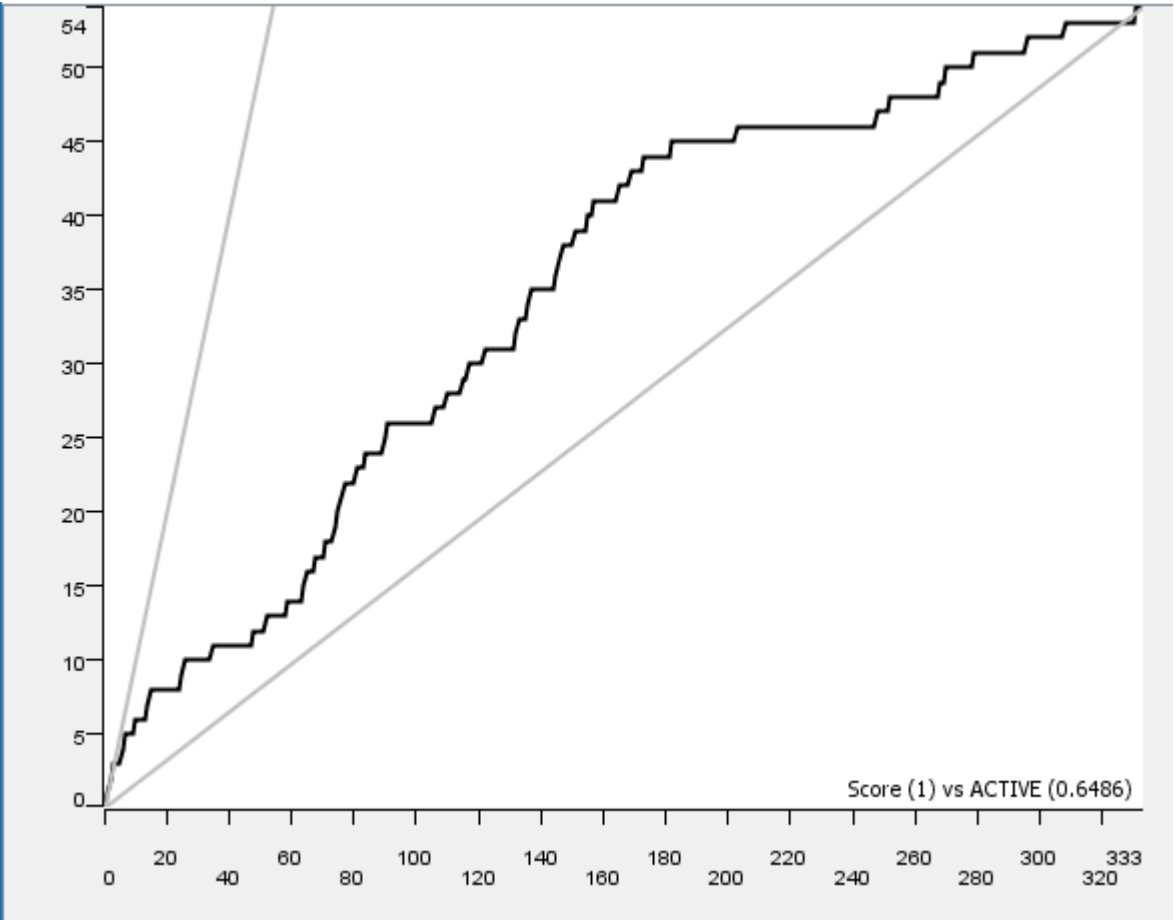

N=333

|                   |                                             |
|-------------------|---------------------------------------------|
| Top 10% Mean IC50 | 350 nM (several severe micromolar mistakes) |
|-------------------|---------------------------------------------|

|          | Predicted Active | Predicted Inactive |
|----------|------------------|--------------------|
| Active   | 23               | 31                 |
| Inactive | 60               | 219                |

# Conclusion - NBN

- An NBN could be generated for Factor Xa with a decision value of  $<2.5$  nM as defined as active. The predictivity of the algorithm could be preserved in three random train/test cycles. The point of failure was 35%, 45% and 45% error.

RF Error Tolerance-  $<2.5$  nM DefGood in Xa

- 0-50% absolute error



RF- <2.5 nM DefGood in Xa, 5% error;  
Random seed = 1515533876005

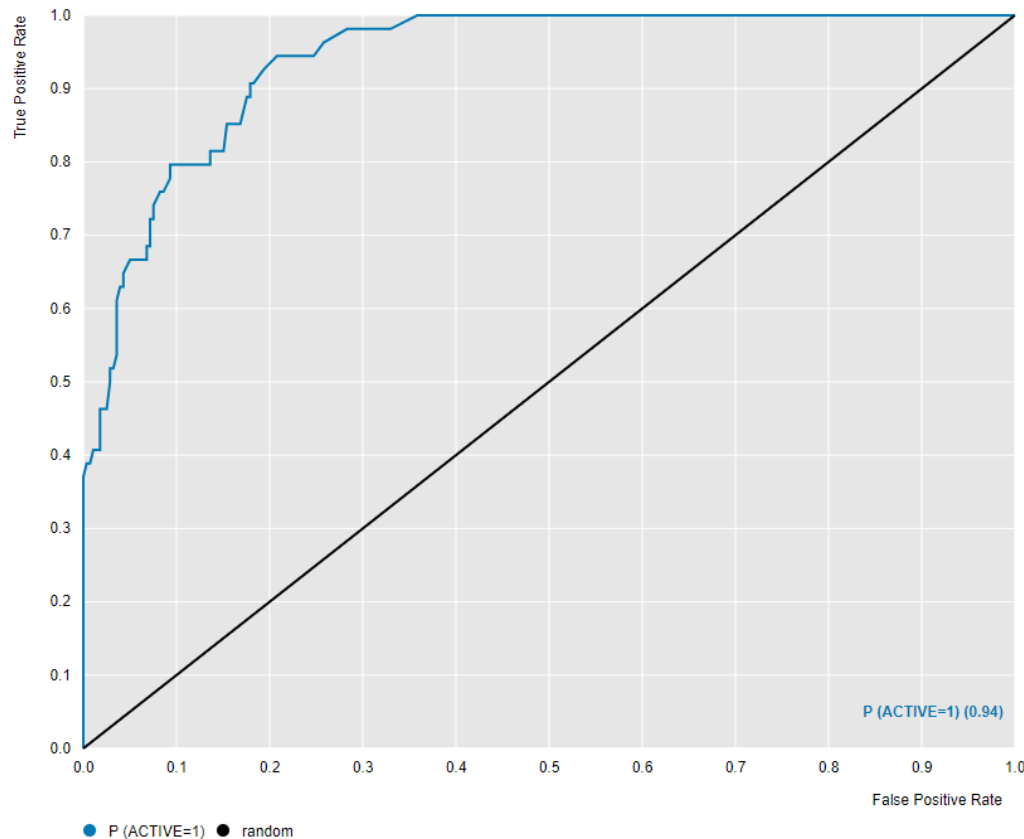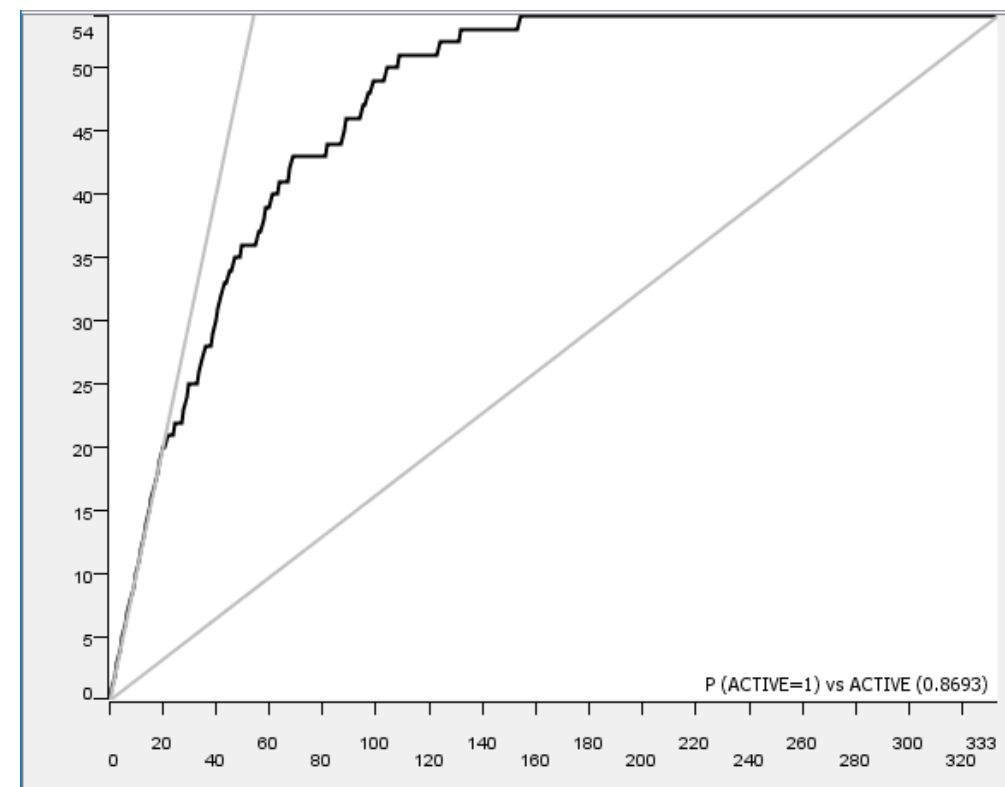

N=333

Top 10% Mean  
IC50

11.5

|          | Predicted Active | Predicted Inactive |
|----------|------------------|--------------------|
| Active   | 36               | 18                 |
| Inactive | 19               | 260                |

# RF-<2.5 nM DefGood in Xa, 10% error

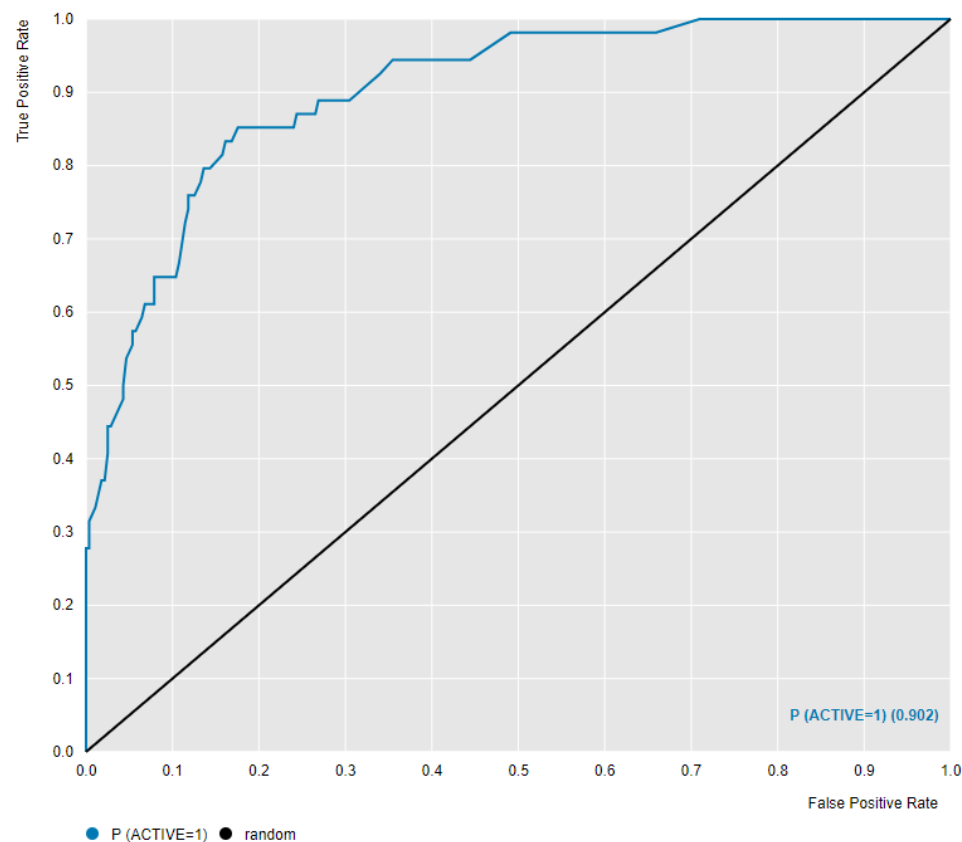

N=333

Top 10% Mean  
IC50

11.9 nM

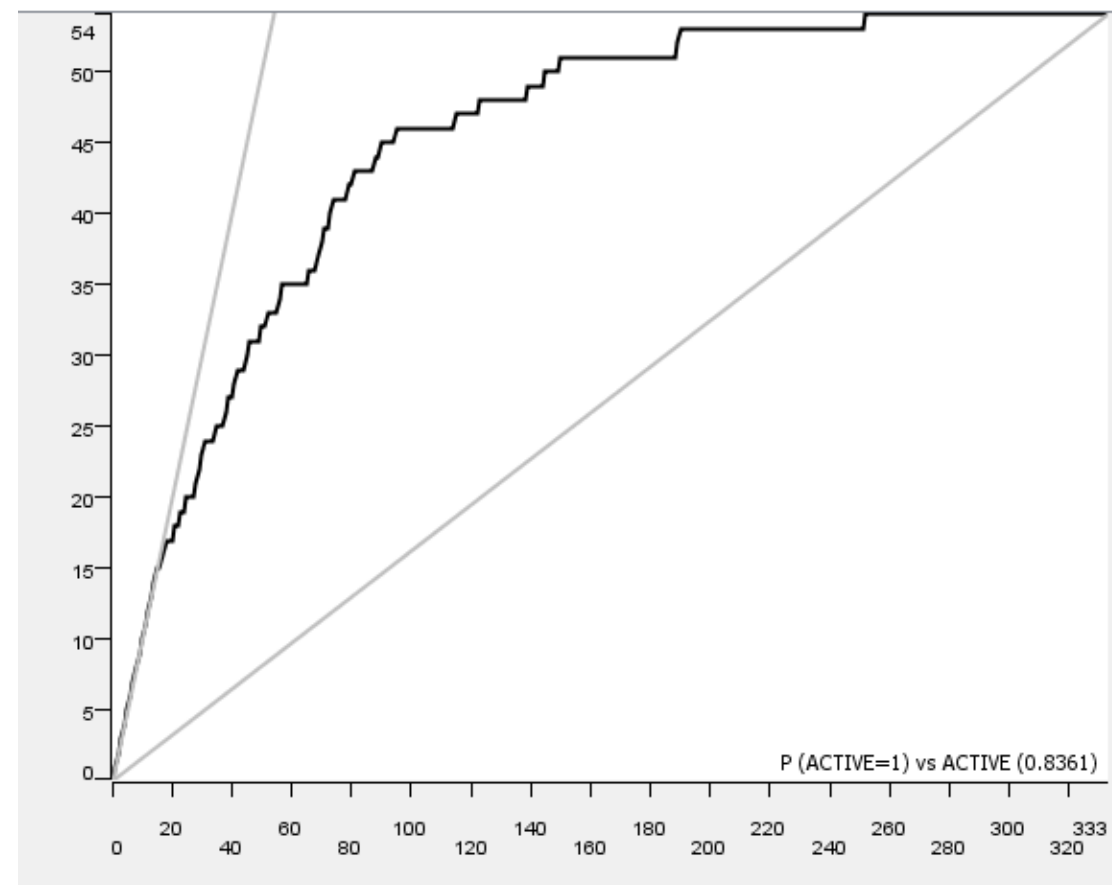

|          | Predicted Active | Predicted Inactive |
|----------|------------------|--------------------|
| Active   | 32               | 22                 |
| Inactive | 18               | 261                |

# RF-<2.5 nM DefGood in Xa, 20% error

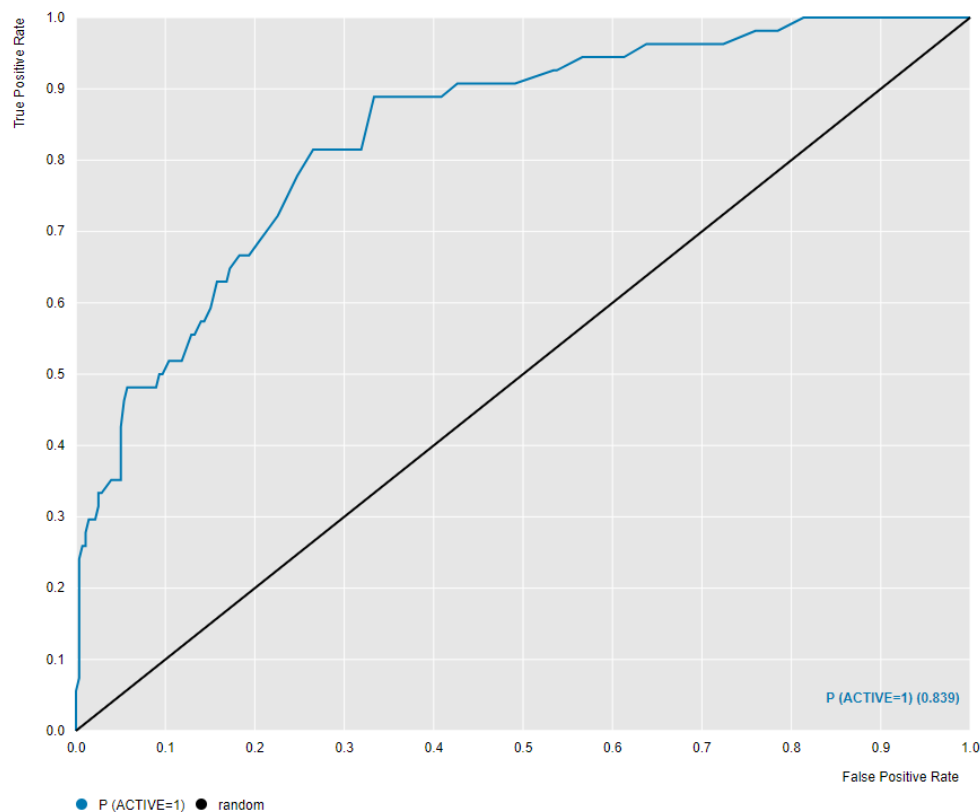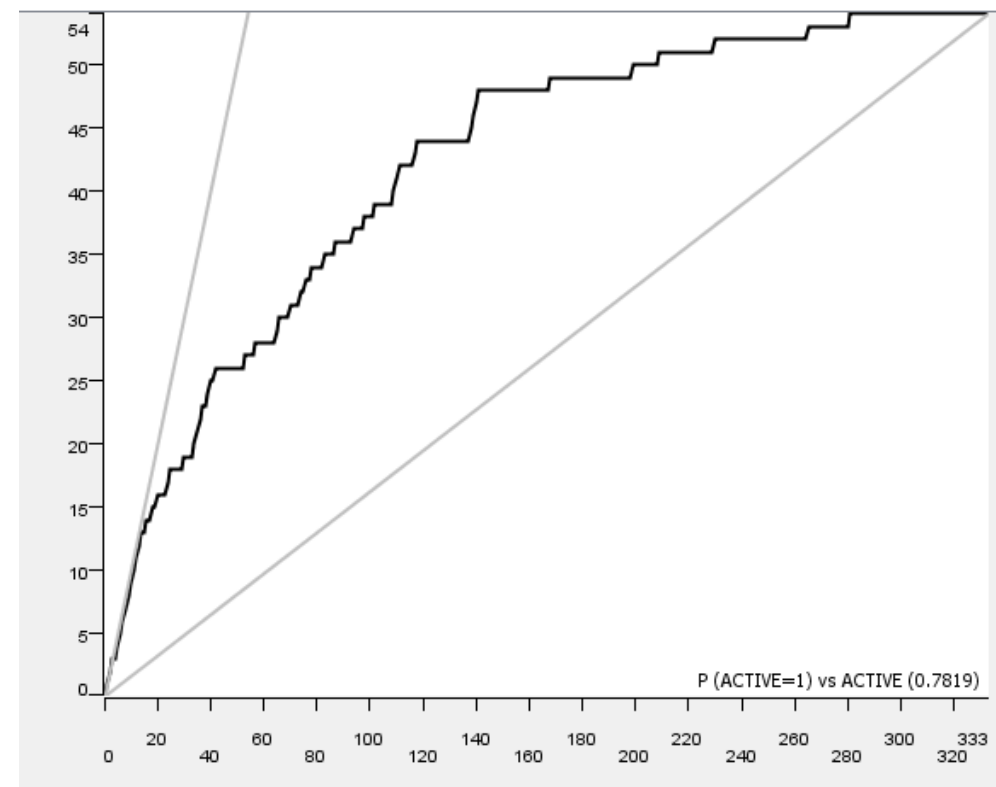

N=333

| Top 10% Mean IC50 | 36.8 nM |
|-------------------|---------|
|-------------------|---------|

|          | Predicted Active | Predicted Inactive |
|----------|------------------|--------------------|
| Active   | 28               | 26                 |
| Inactive | 32               | 247                |

# RF-<2.5 nM DefGood in Xa, 25% error

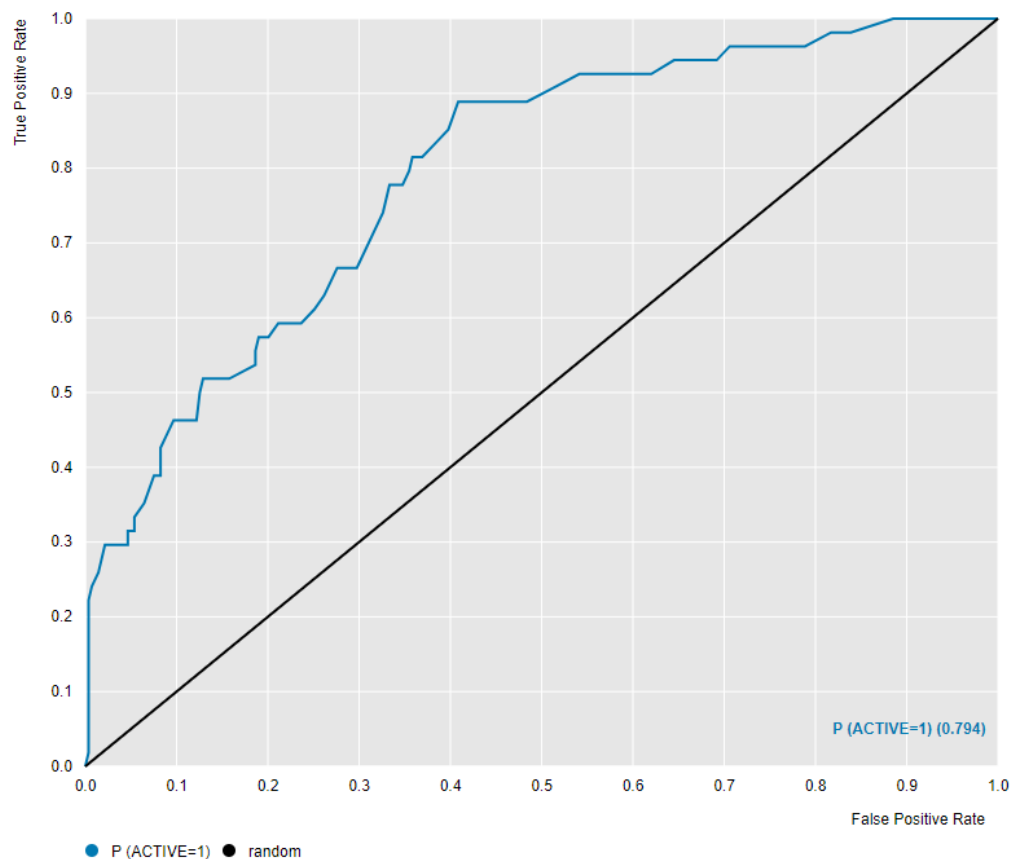

N=333

Top 10% Mean  
IC50

30.2 nM

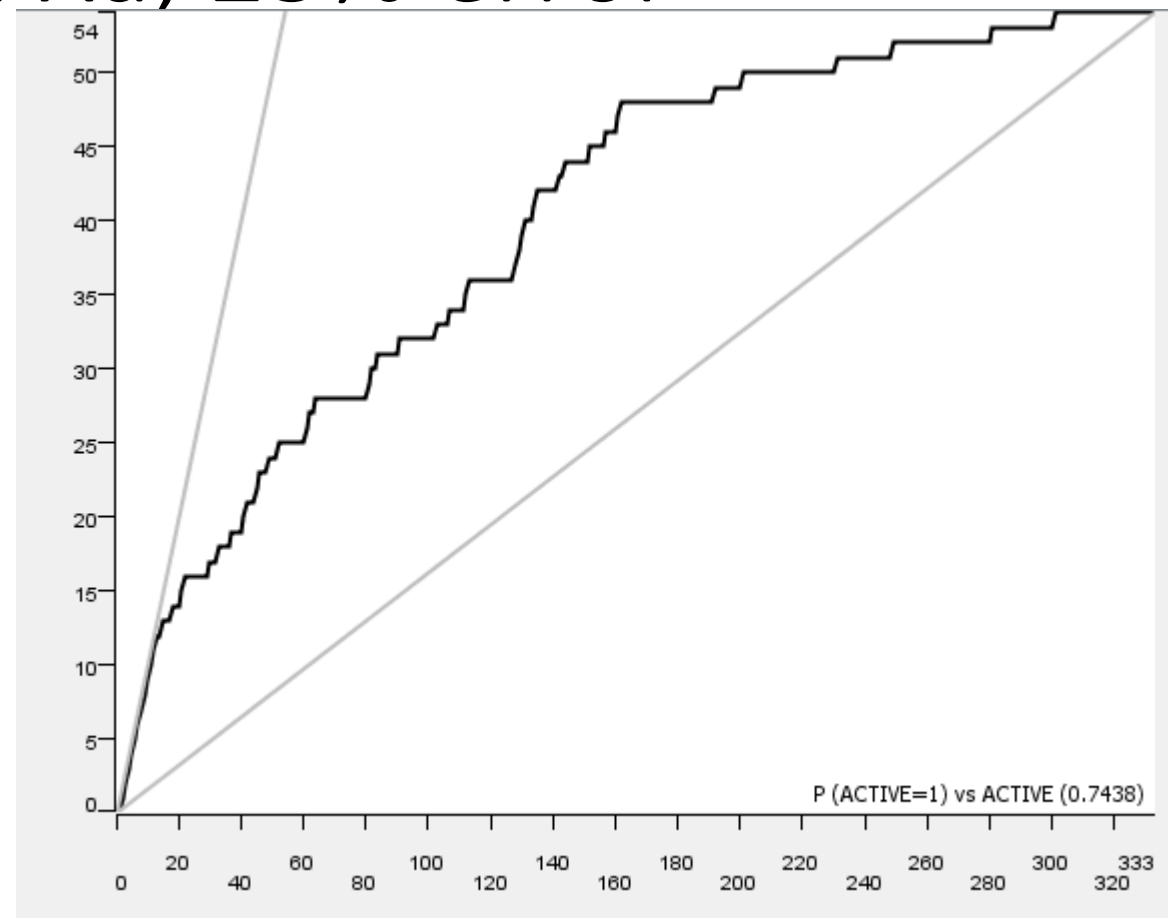

|          | Predicted Active | Predicted Inactive |
|----------|------------------|--------------------|
| Active   | 25               | 29                 |
| Inactive | 34               | 245                |

# <2.5 nM DefGood in Xa, 30% error

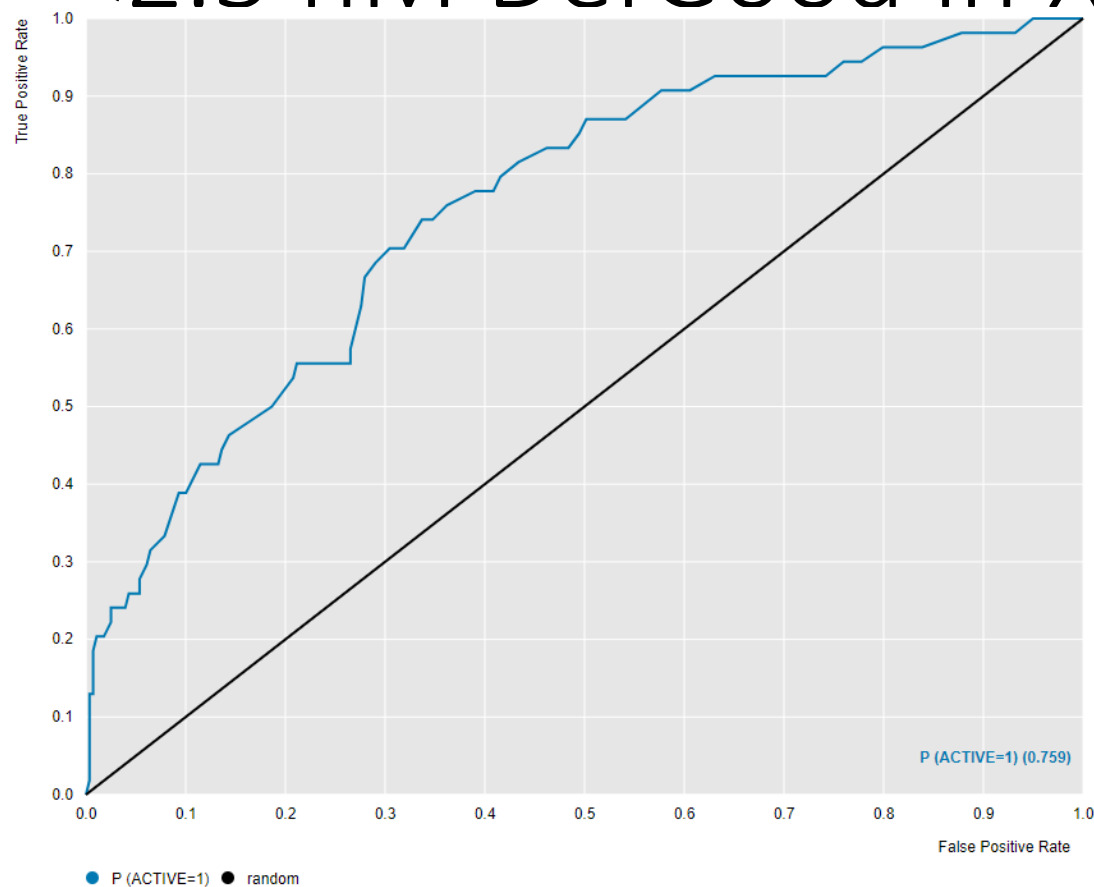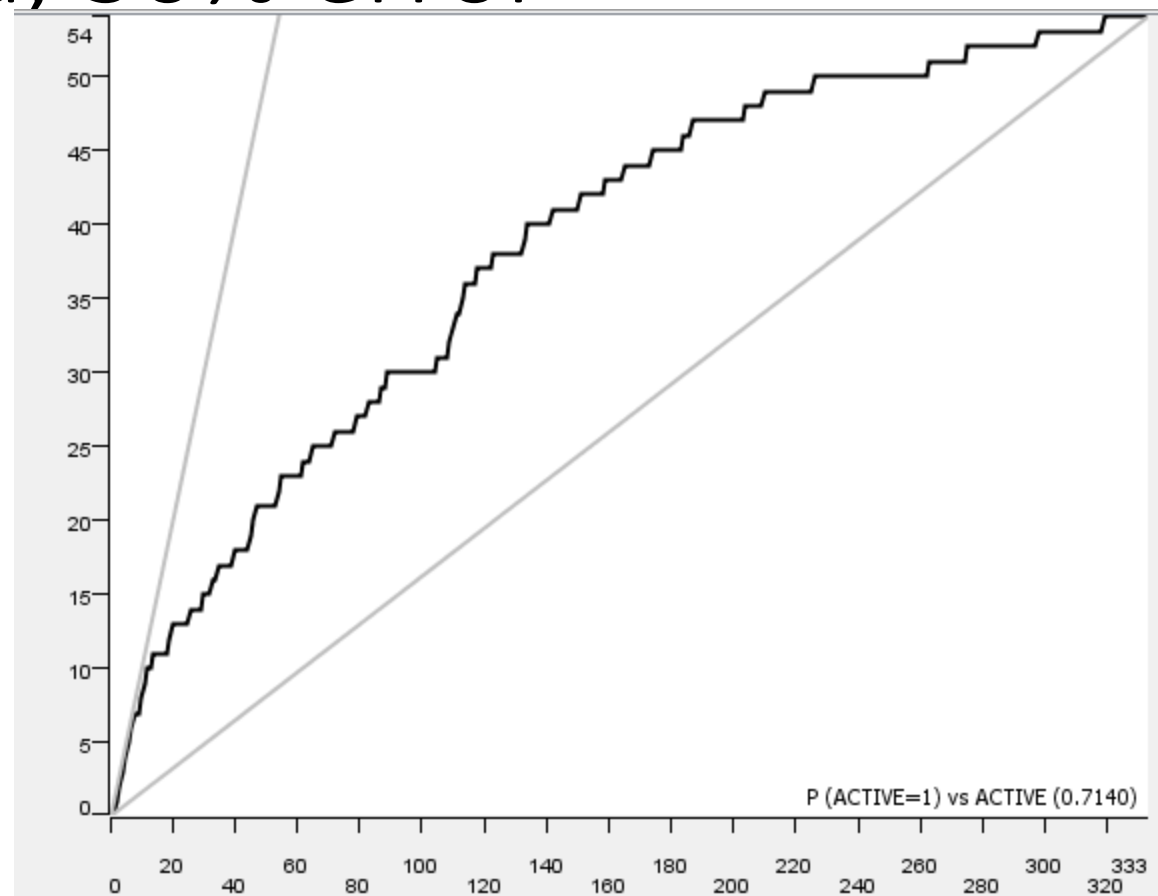

N=333

| Top 10% Mean IC50 | 1,000 nM |
|-------------------|----------|
|-------------------|----------|

|          | Predicted Active | Predicted Inactive |
|----------|------------------|--------------------|
| Active   | 27               | 27                 |
| Inactive | 52               | 227                |

<2.5 nM DefGood in Xa, 10% error; Random seed = 429

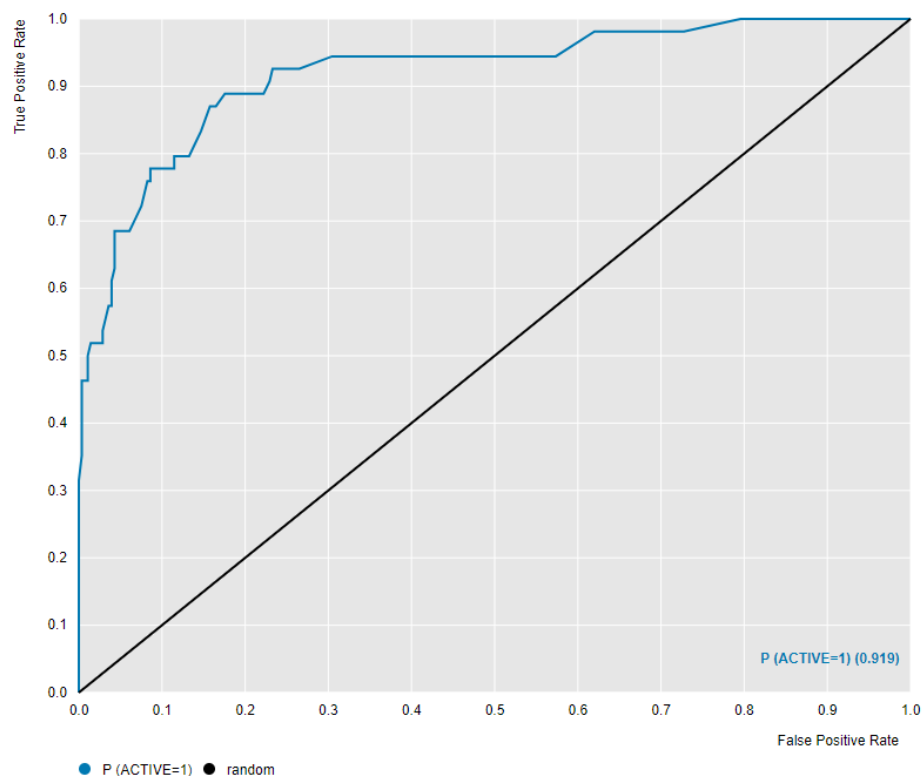

N=333

| Top 10% Mean IC50 | 3.3 nM |
|-------------------|--------|
|-------------------|--------|

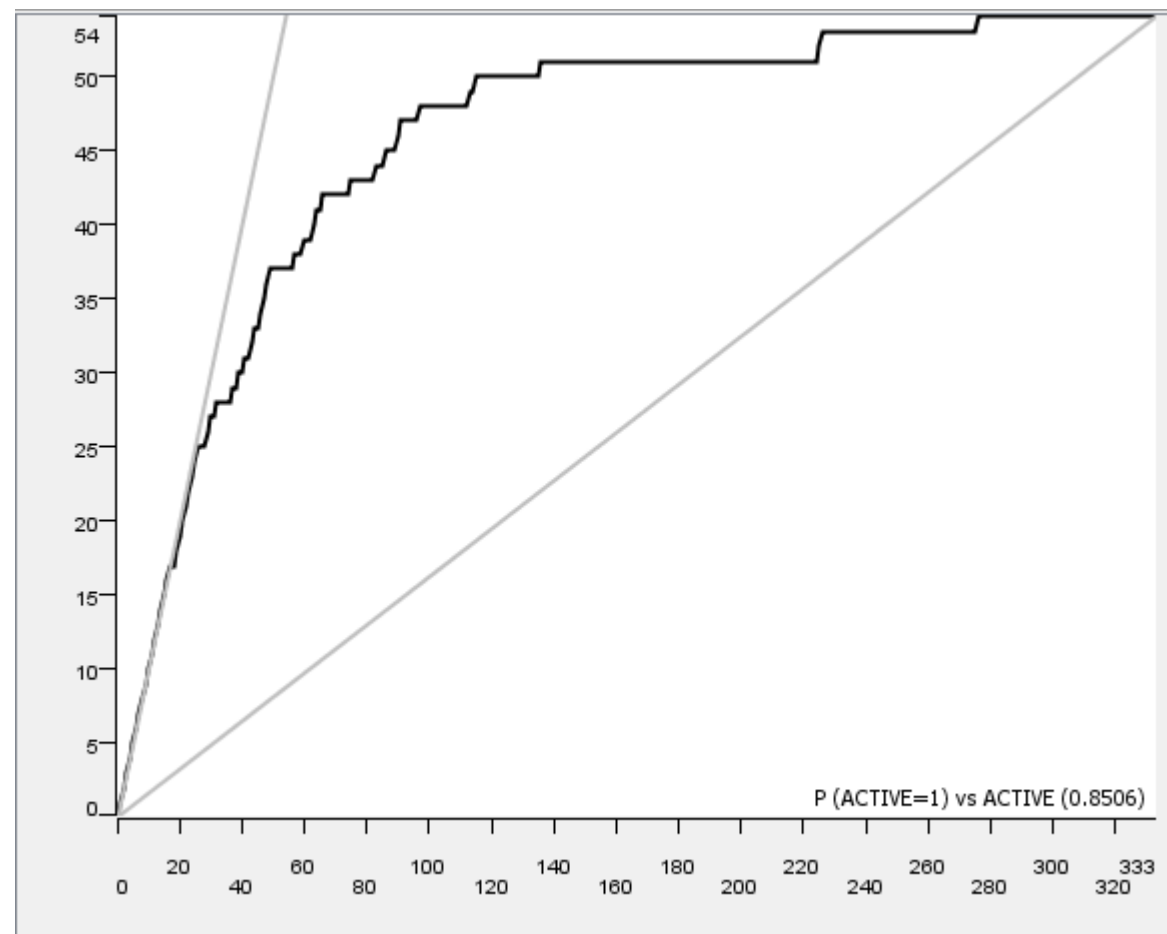

|          | Predicted Active | Predicted Inactive |
|----------|------------------|--------------------|
| Active   | 37               | 17                 |
| Inactive | 13               | 266                |

<2.5 nM DefGood in Xa, 20% error; Random seed = 429

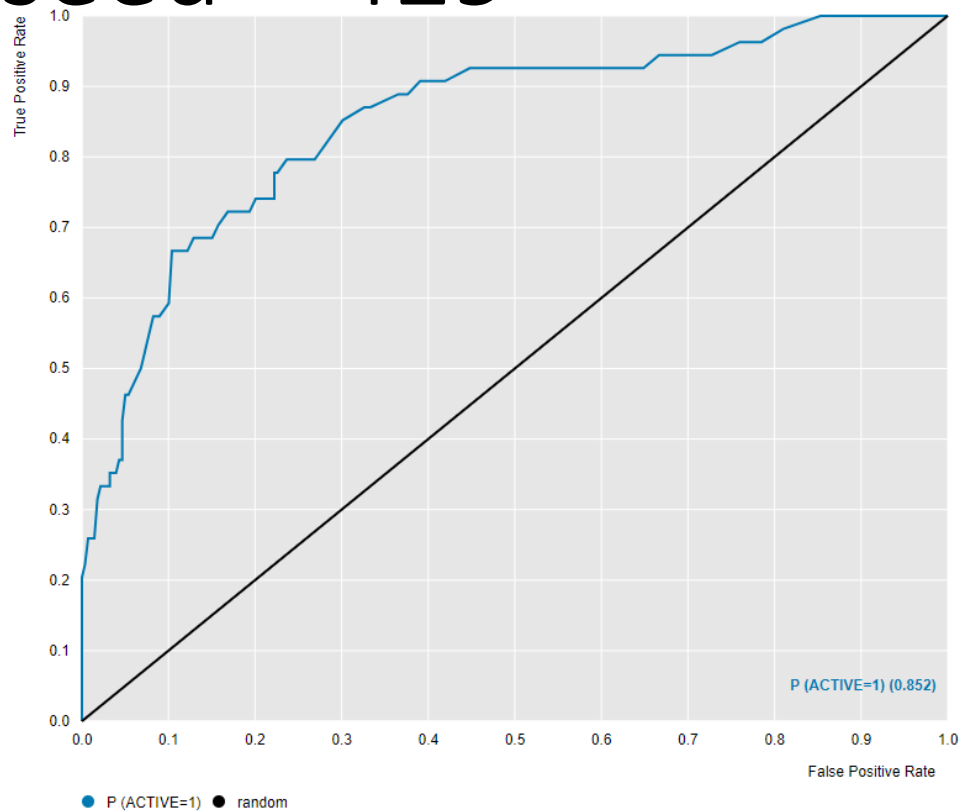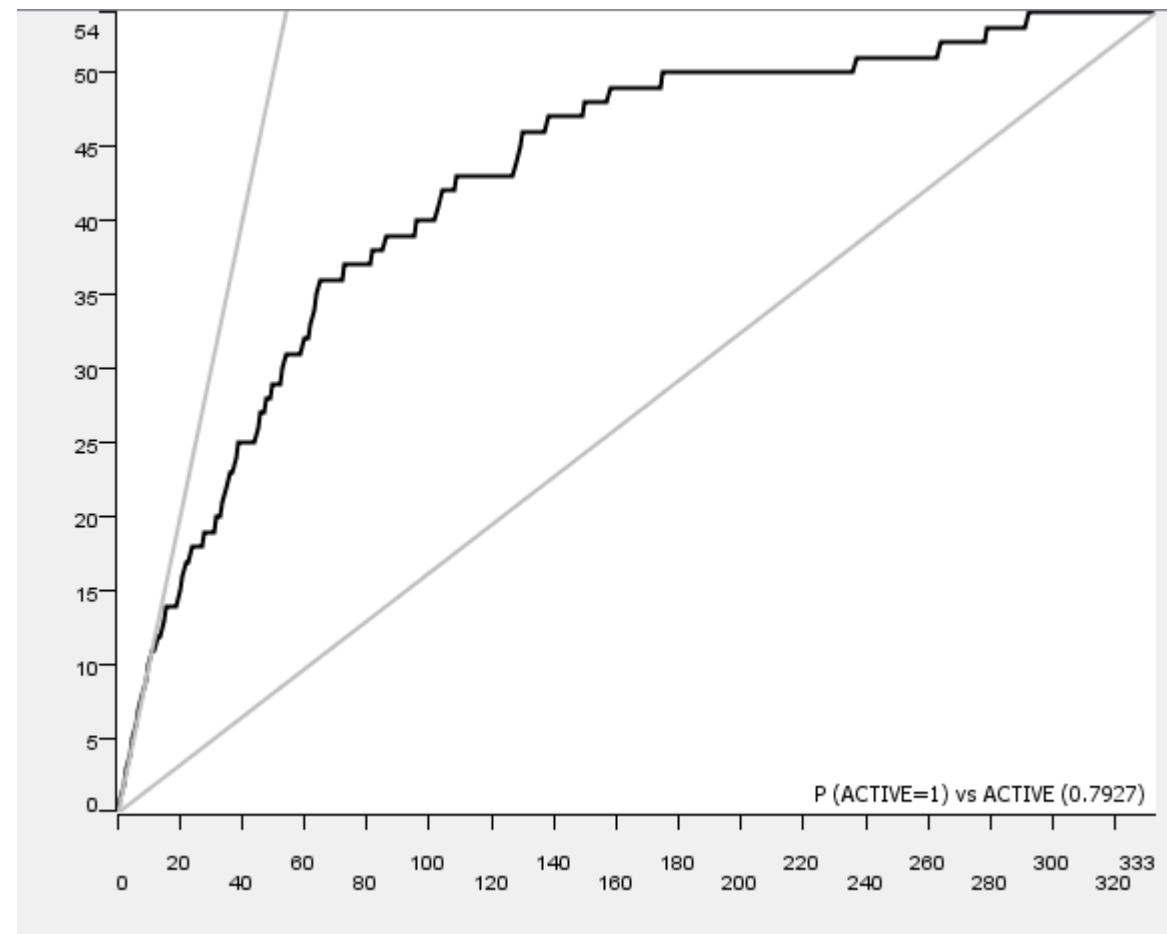

N=333

|                      |                                      |
|----------------------|--------------------------------------|
| Top 10% Mean<br>IC50 | 48.7 nM<br>One (1,100 nM)<br>mistake |
|----------------------|--------------------------------------|

|          | Predicted Active | Predicted Inactive |
|----------|------------------|--------------------|
| Active   | 31               | 23                 |
| Inactive | 23               | 256                |

<2.5 nM DefGood in Xa, 25% error; Random seed = 429

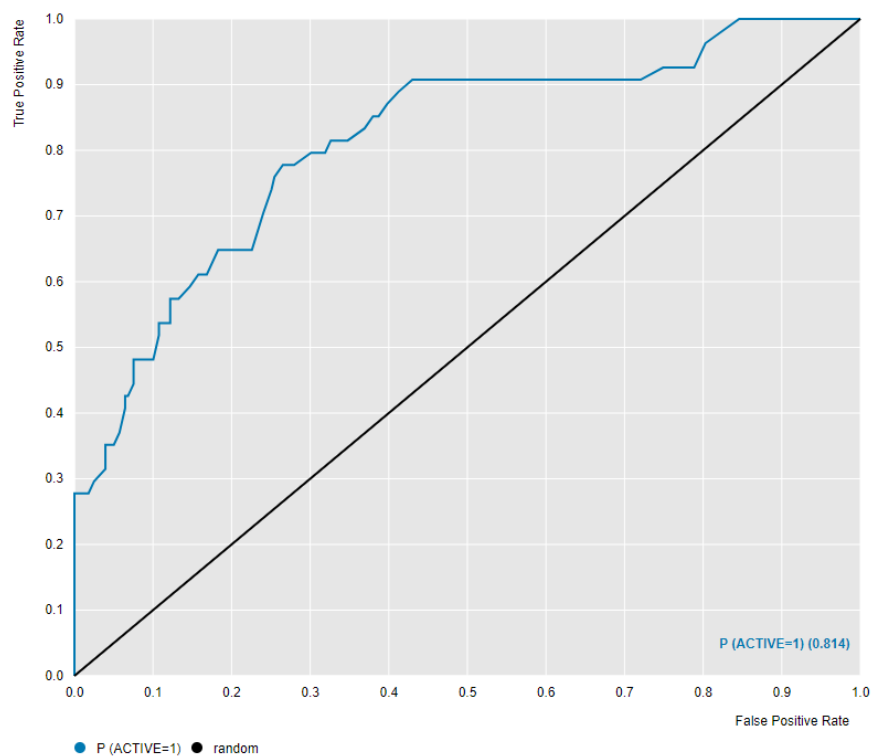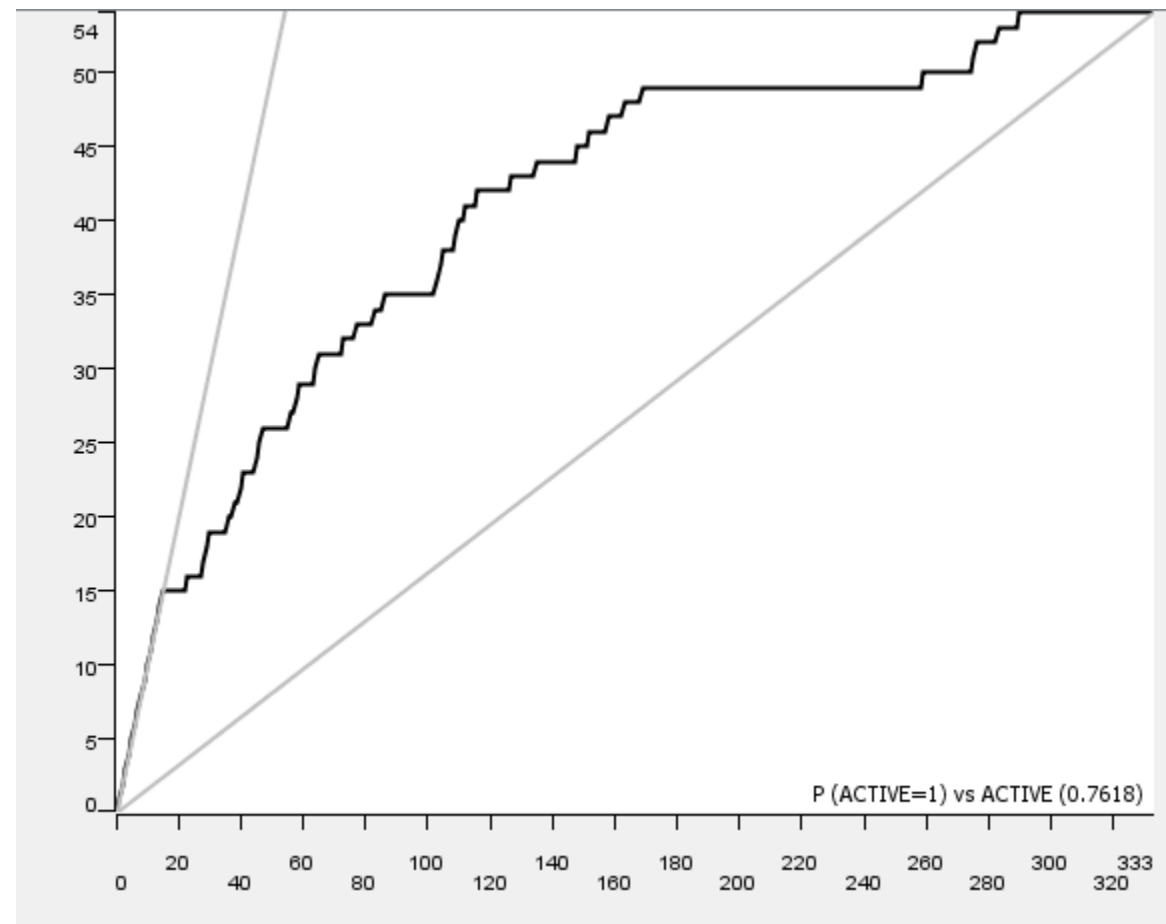

N=333

Top 10% Mean  
IC50

60.5 nM  
One (1,100 nM)  
mistake

|          | Predicted Active | Predicted Inactive |
|----------|------------------|--------------------|
| Active   | 29               | 25                 |
| Inactive | 34               | 245                |



<2.5 nM DefGood in Xa, 30% error; Random seed = 429

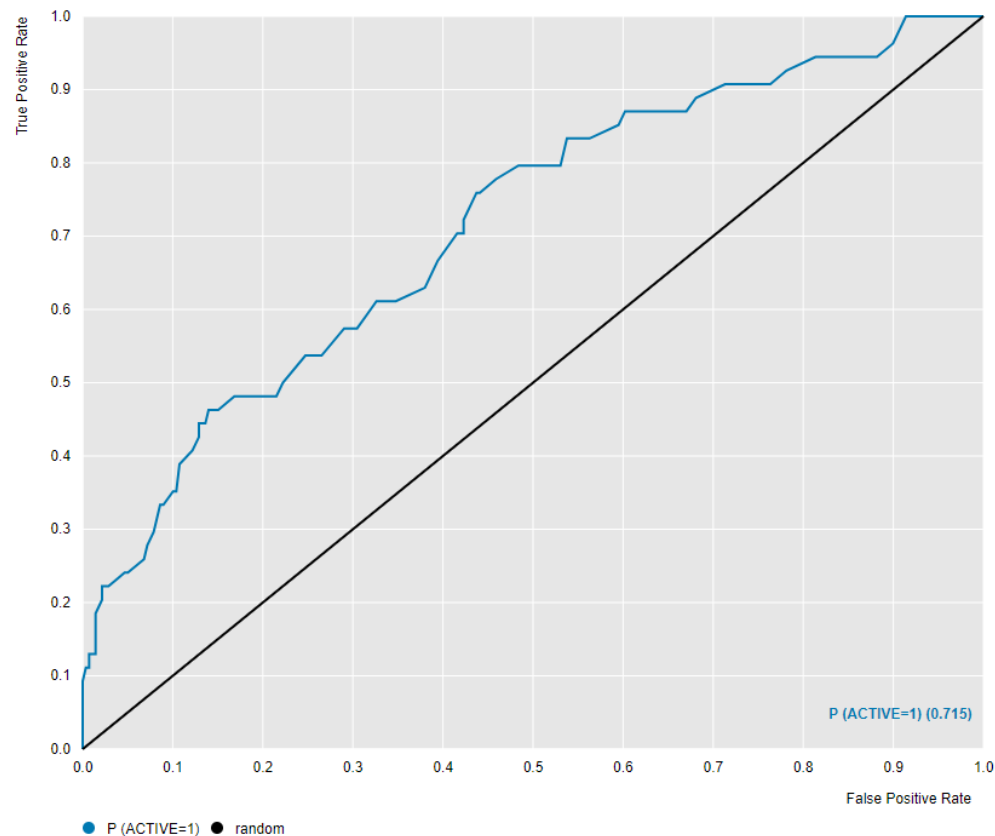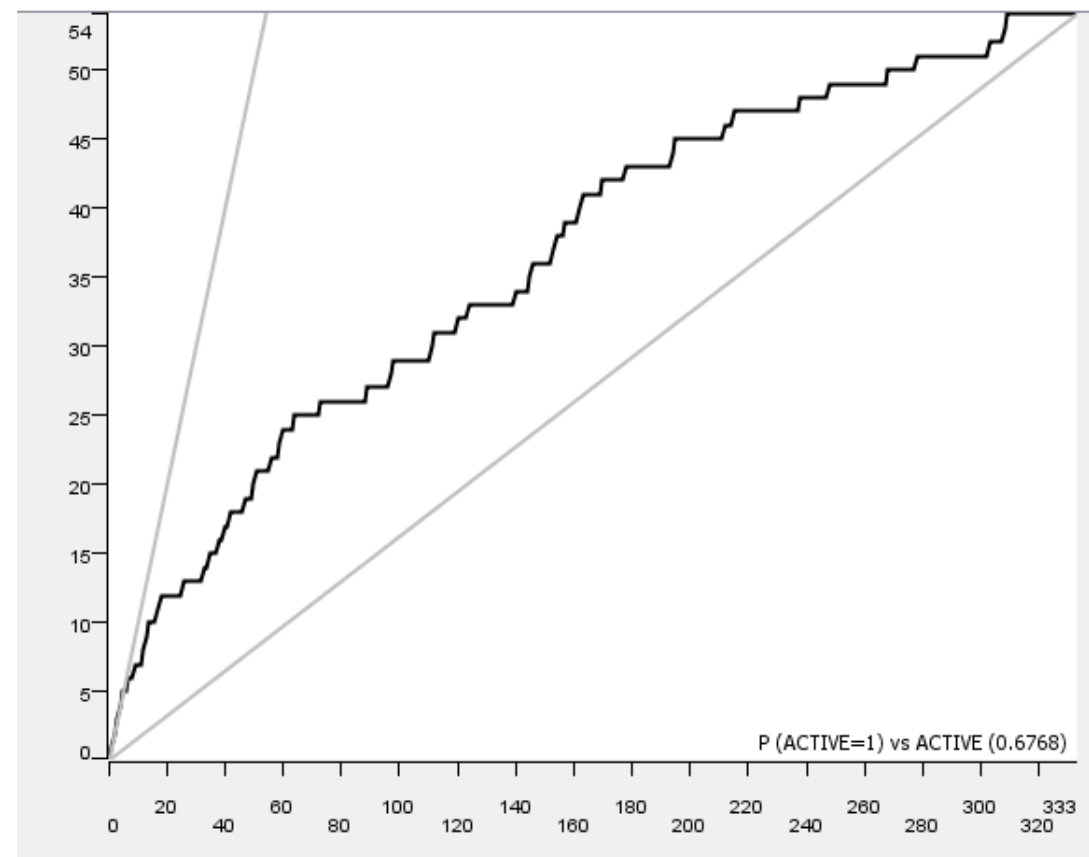

N=333

| Top 10% Mean IC50 | 530 nM |
|-------------------|--------|
|-------------------|--------|

|          | Predicted Active | Predicted Inactive |
|----------|------------------|--------------------|
| Active   | 26               | 28                 |
| Inactive | 49               | 230                |

<2.5 nM DefGood in Xa, 10% error; Random seed = 121783

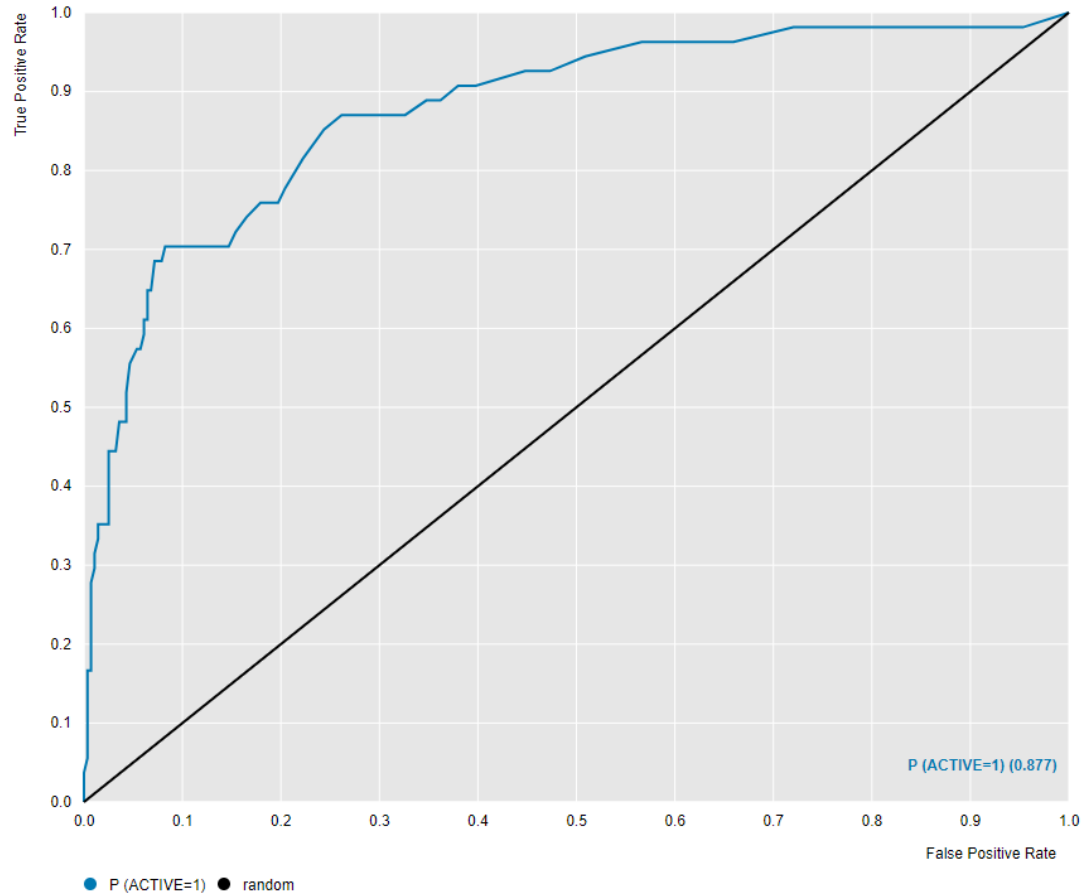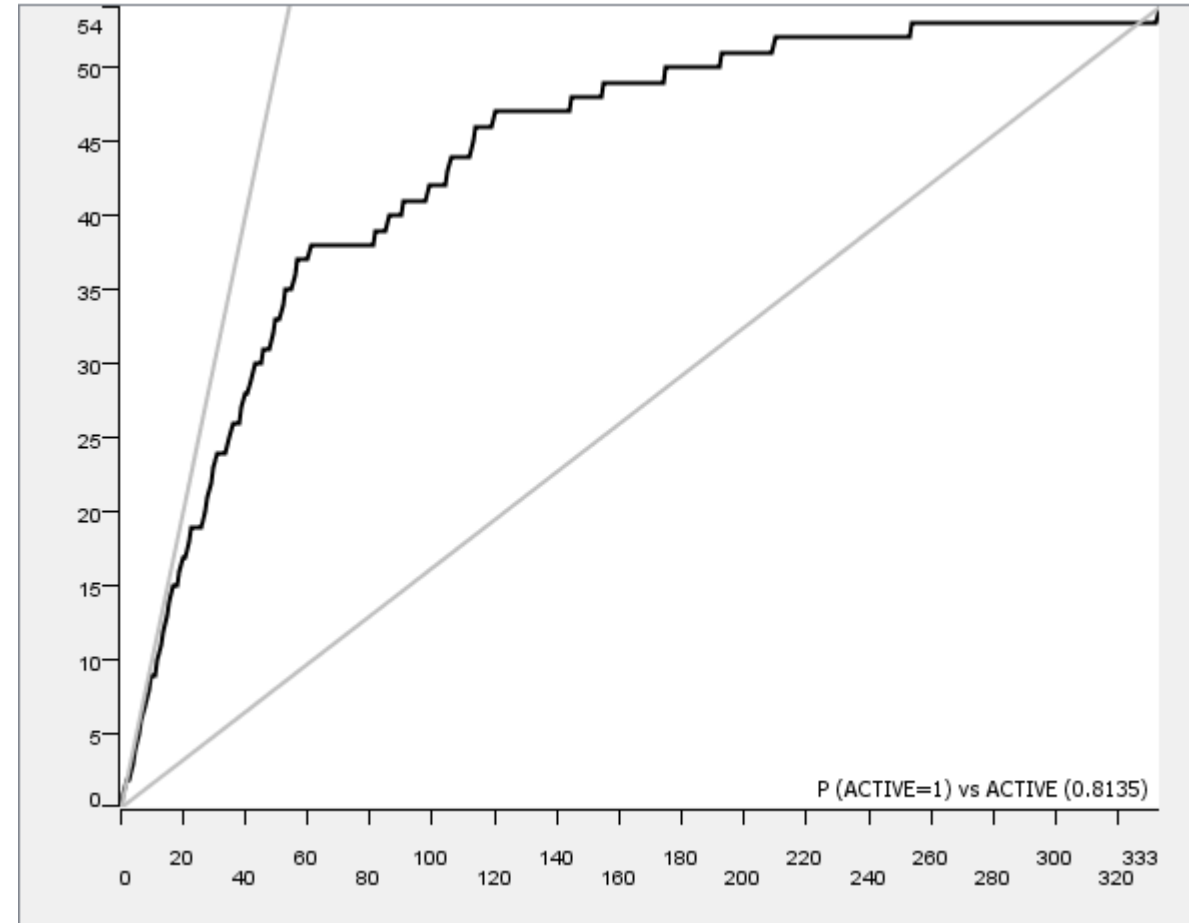

N=333

| Top 10% Mean IC50 | 12.5 nM |
|-------------------|---------|
|-------------------|---------|

|          | Predicted Active | Predicted Inactive |
|----------|------------------|--------------------|
| Active   | 30               | 24                 |
| Inactive | 13               | 266                |

<2.5 nM DefGood in Xa, 20% error; Random seed = 121783

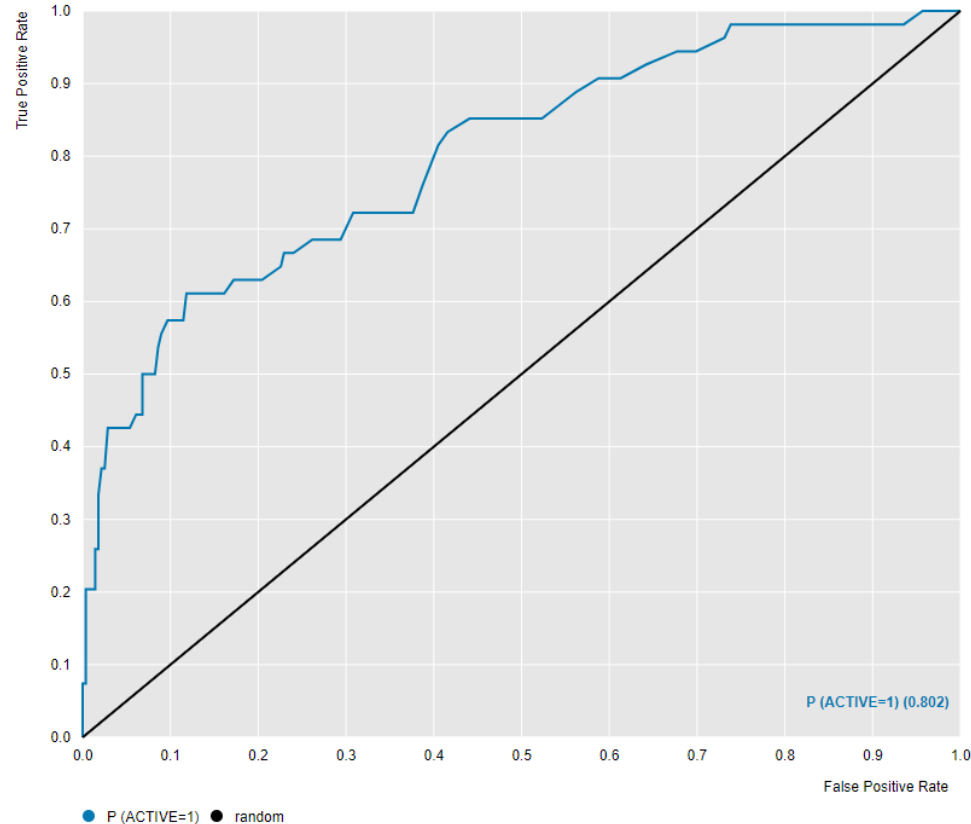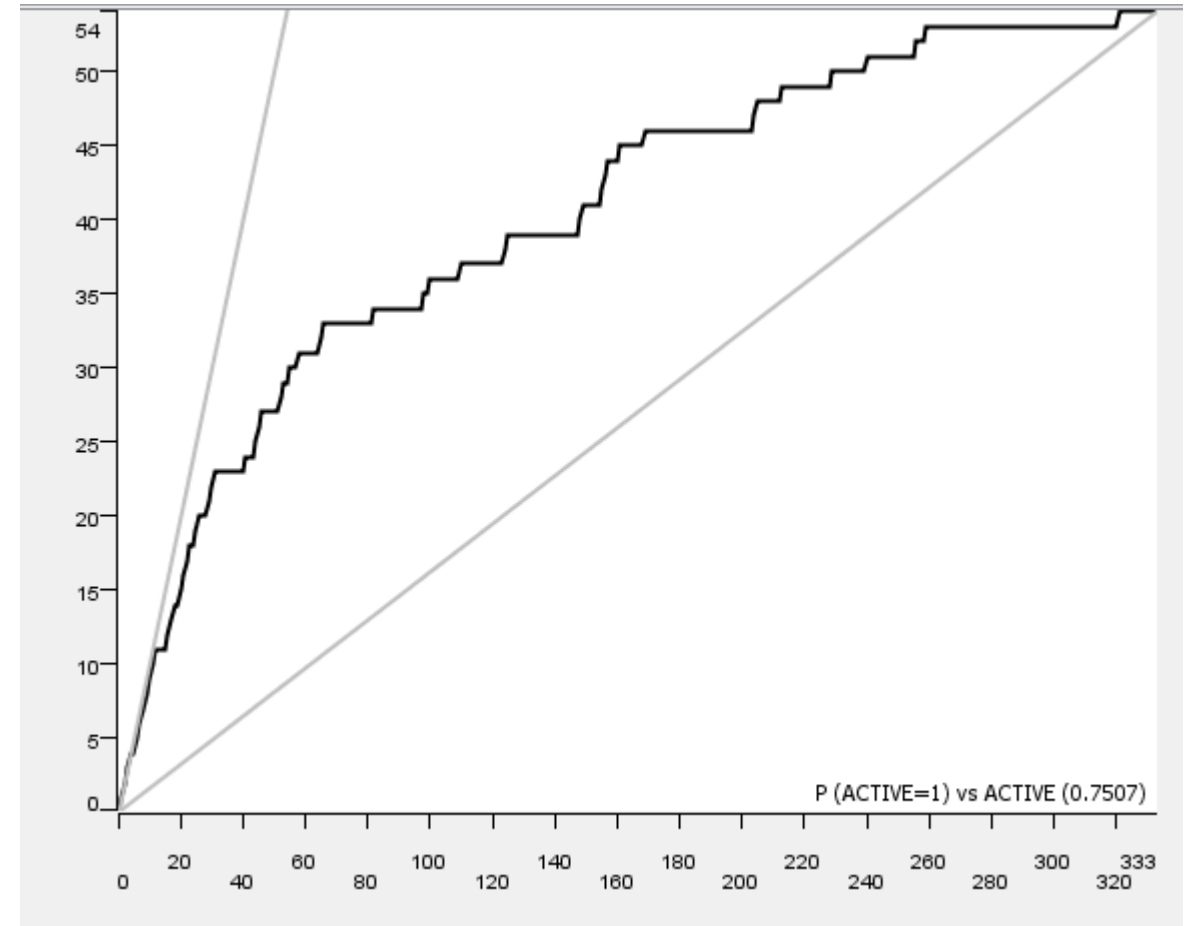

N=333

| Top 10% Mean IC50 | 200 nM (2 micromolar mistakes) |
|-------------------|--------------------------------|
|-------------------|--------------------------------|

|          | Predicted Active | Predicted Inactive |
|----------|------------------|--------------------|
| Active   | 27               | 27                 |
| Inactive | 22               | 257                |

<2.5 nM DefGood in Xa, 25% error; Random seed = 121783

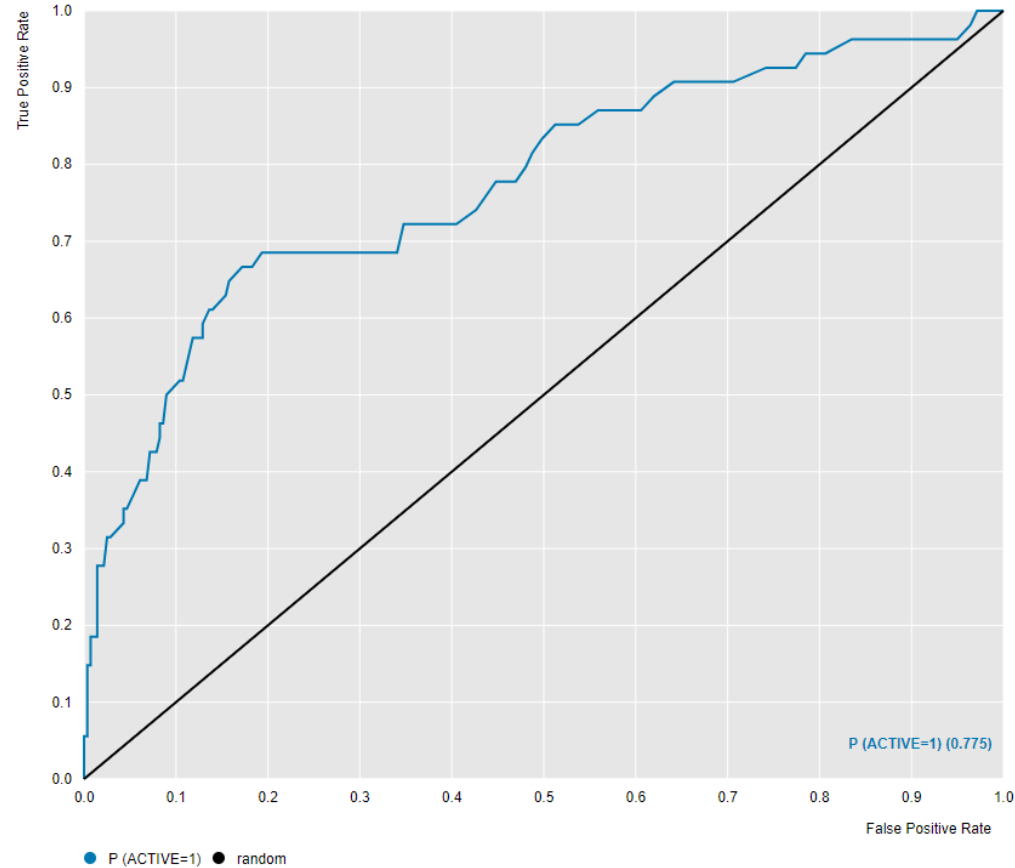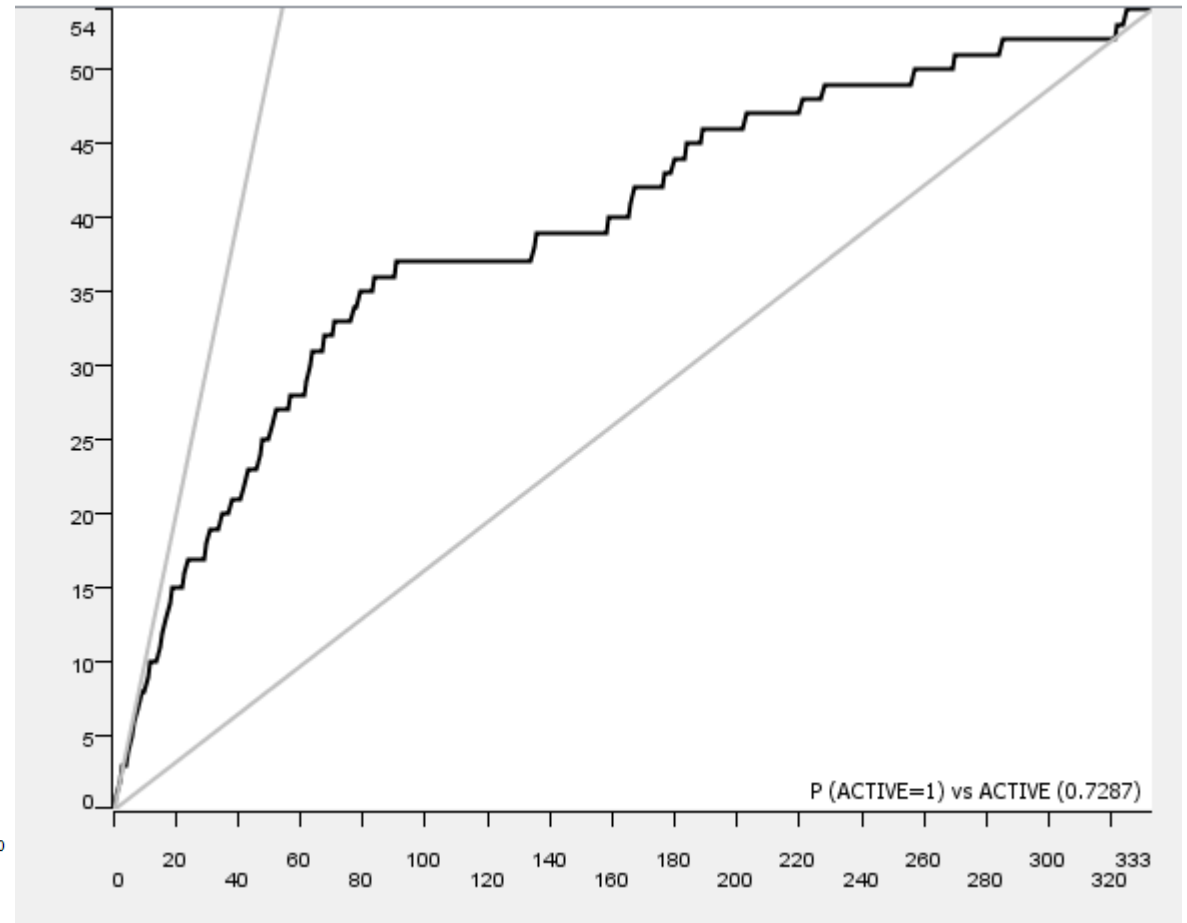

N=333

Top 10% Mean  
IC50

130 nM  
(One mistake -  
930 nM)

|          | Predicted Active | Predicted Inactive |
|----------|------------------|--------------------|
| Active   | 31               | 23                 |
| Inactive | 33               | 246                |

<2.5 nM DefGood in Xa, 30% error; Random seed = 121783

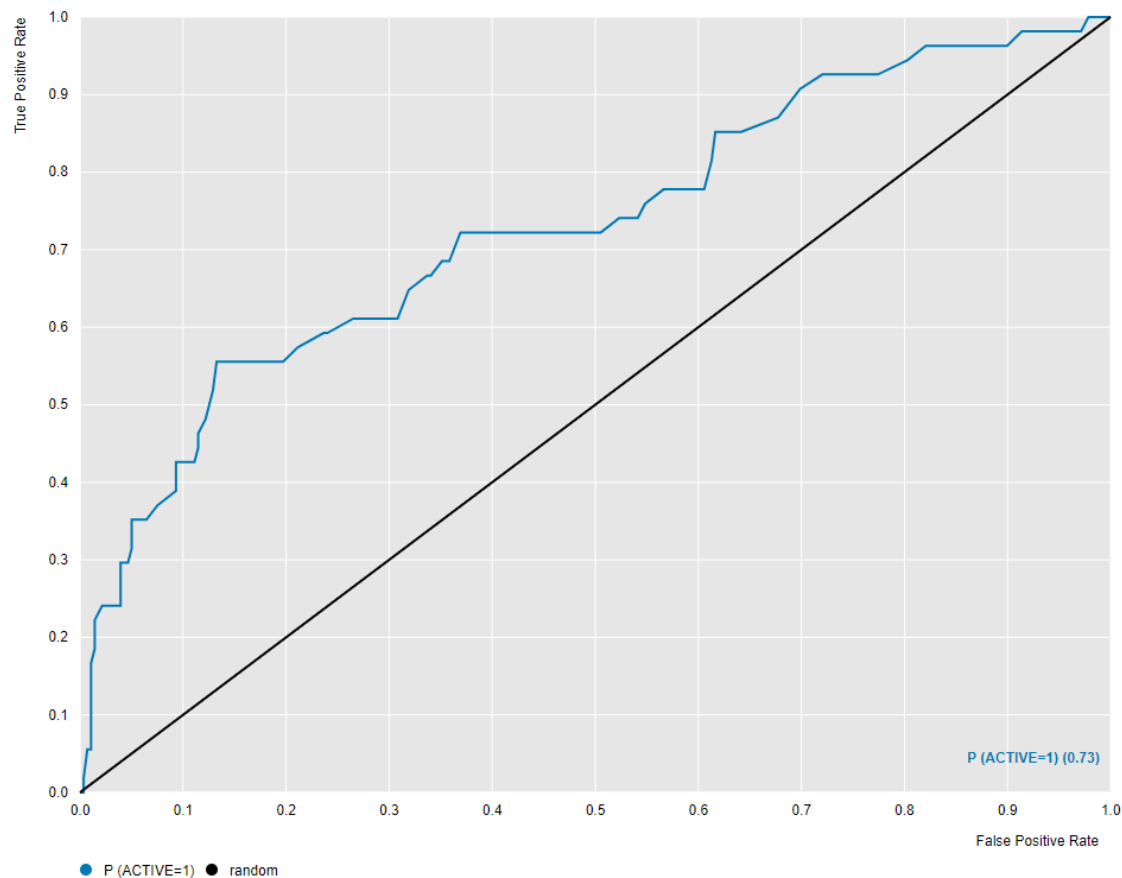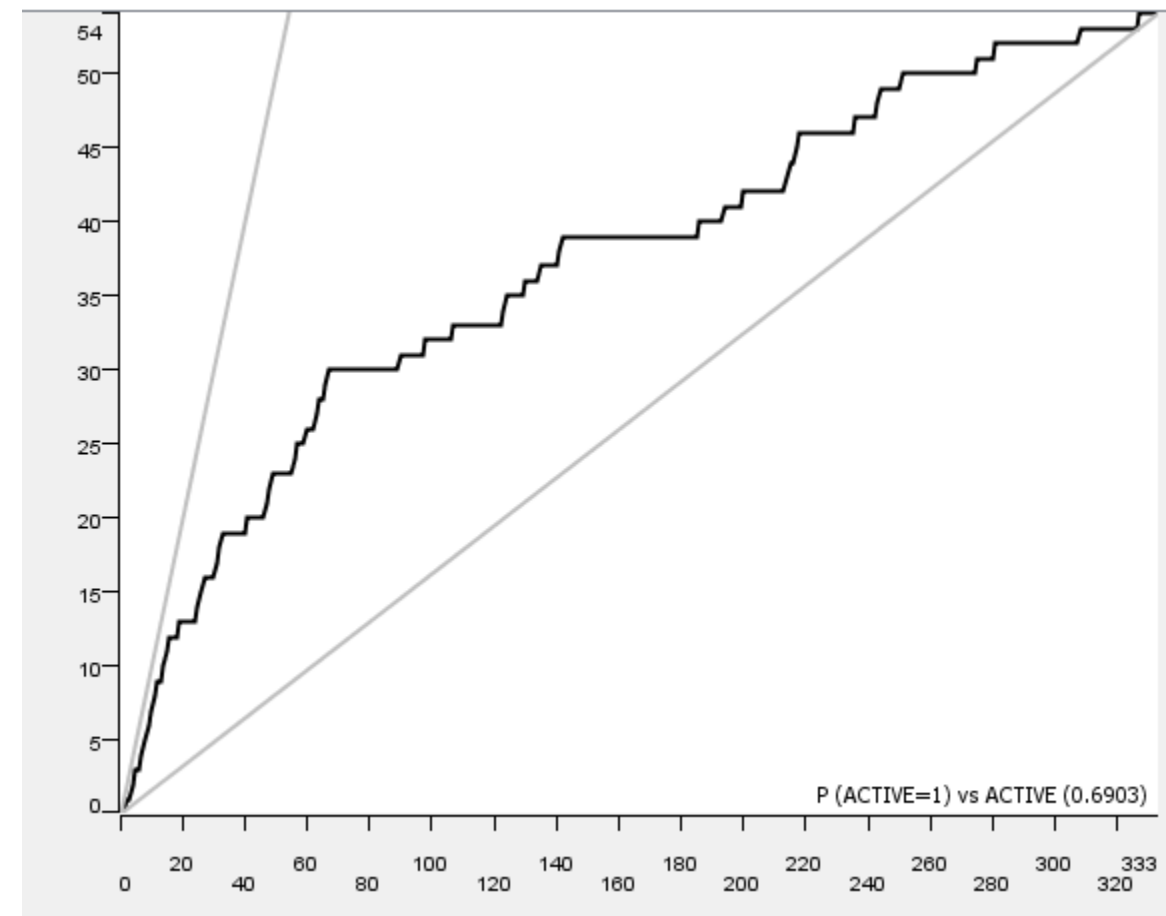

N=333

Top 10% Mean  
IC50

680 nM

|          | Predicted Active | Predicted Inactive |
|----------|------------------|--------------------|
| Active   | 30               | 24                 |
| Inactive | 51               | 228                |

# Conclusion - RF

- A Random Forrest could be generated for Factor Xa with a decision value of  $<2.5$  nM as defined as active. The predictivity of the algorithm could be preserved in three random train/test cycles. The point of failure was 30%, 30% and 30% error.

PNN - <2.5 nM DefGood in Xa, 5% error ;  
Random seed = 1515533876005

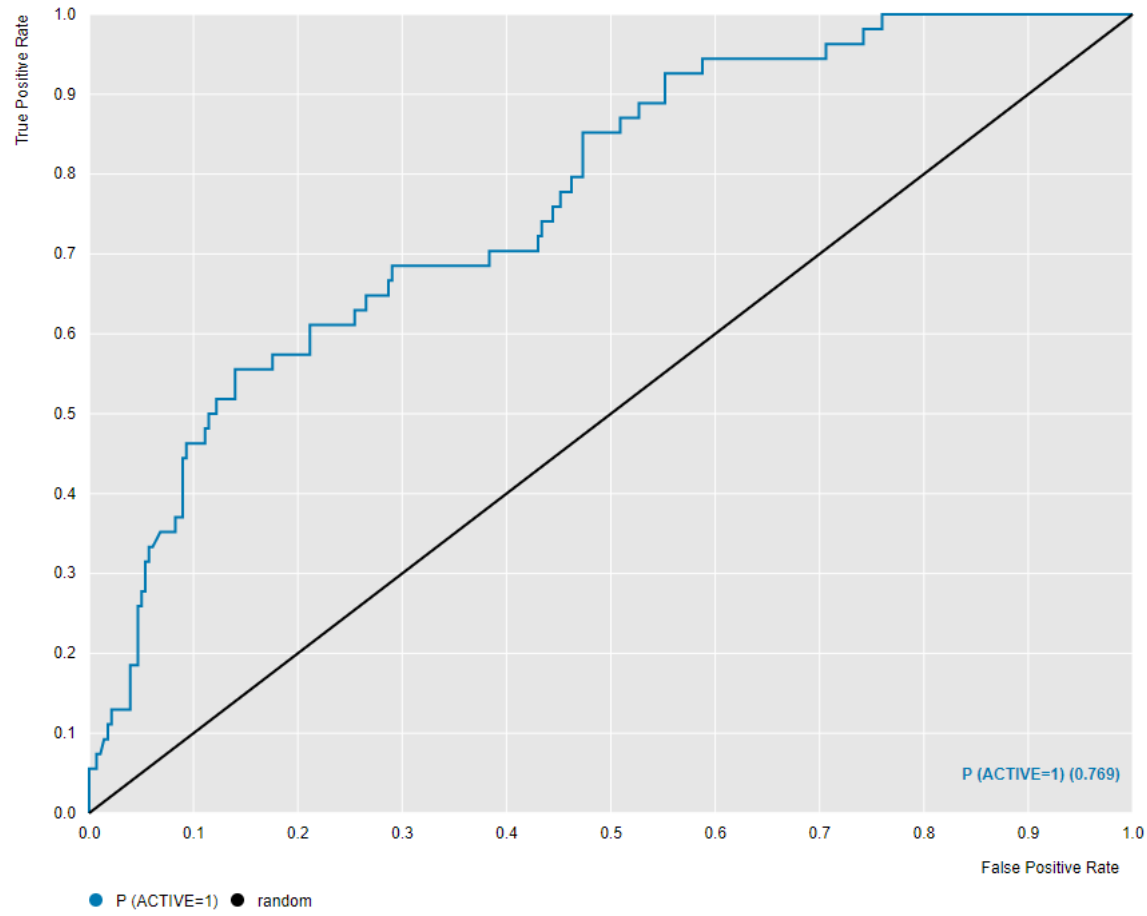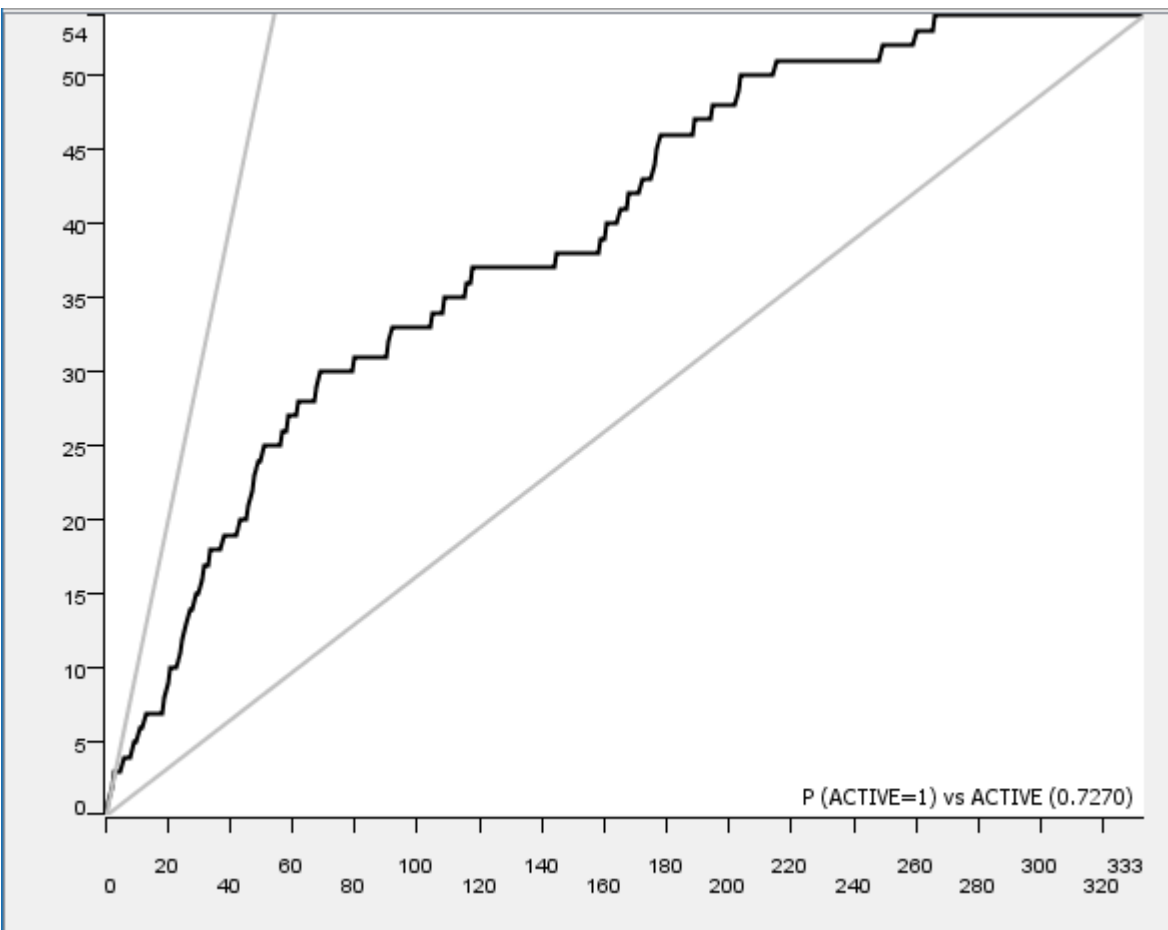

N=333

|                   |                                    |
|-------------------|------------------------------------|
| Top 10% Mean IC50 | 83.5 nM<br>(one 2,000 nM compound) |
|-------------------|------------------------------------|

|          | Predicted Active | Predicted Inactive |
|----------|------------------|--------------------|
| Active   | 19               | 35                 |
| Inactive | 20               | 259                |

# PNN - <2.5 nM DefGood in Xa, 10% error

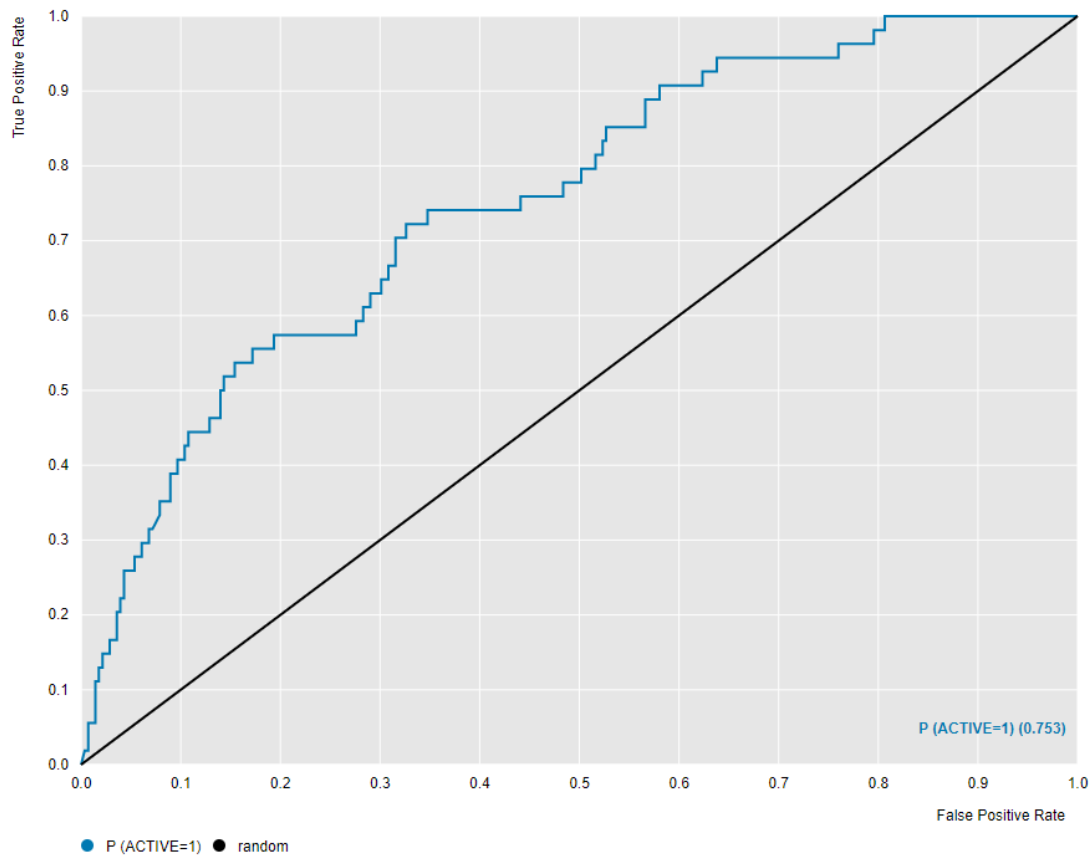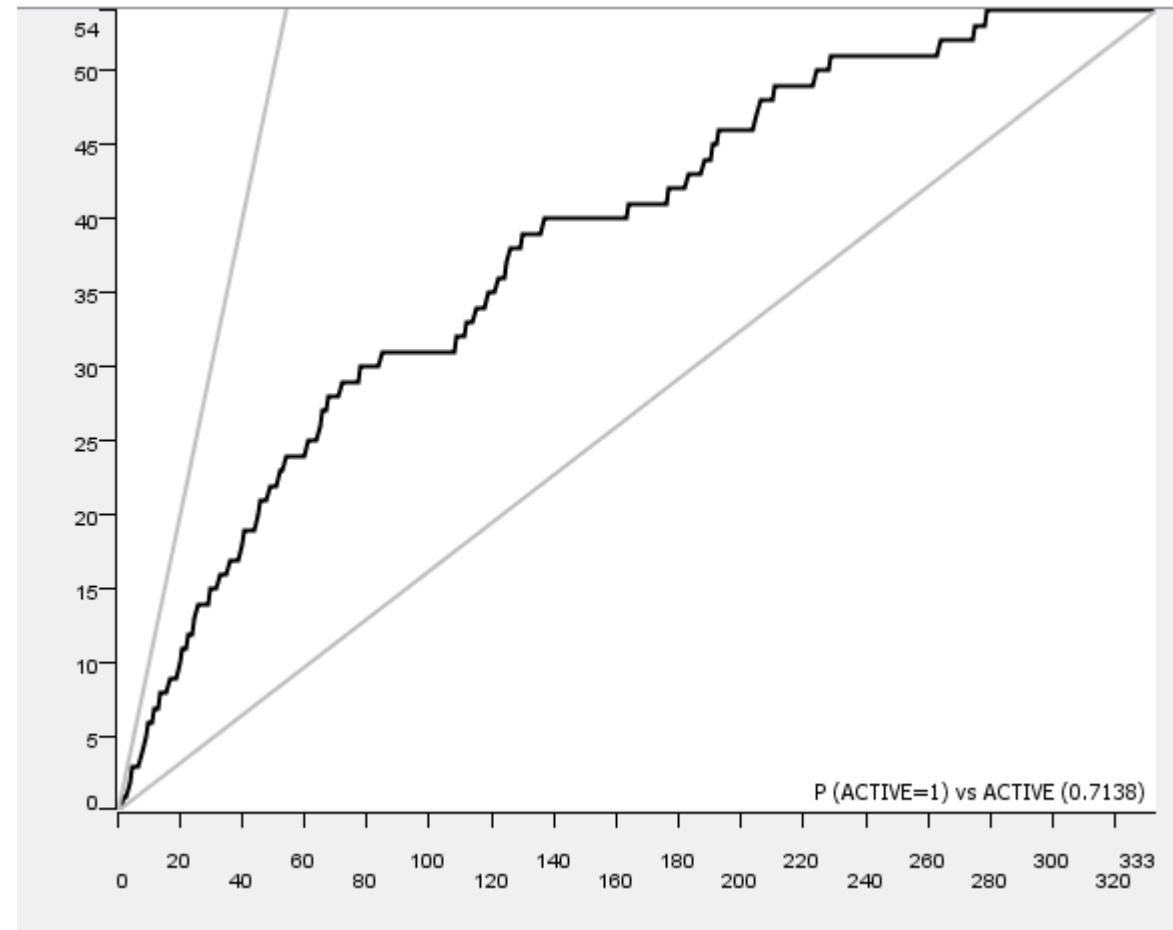

N=333

Top 10% Mean  
IC50

120 nM  
(two micromolar  
mistakes)

|          | Predicted Active | Predicted Inactive |
|----------|------------------|--------------------|
| Active   | 19               | 35                 |
| Inactive | 23               | 256                |



# PNN - <2.5 nM DefGood in Xa, 15% error

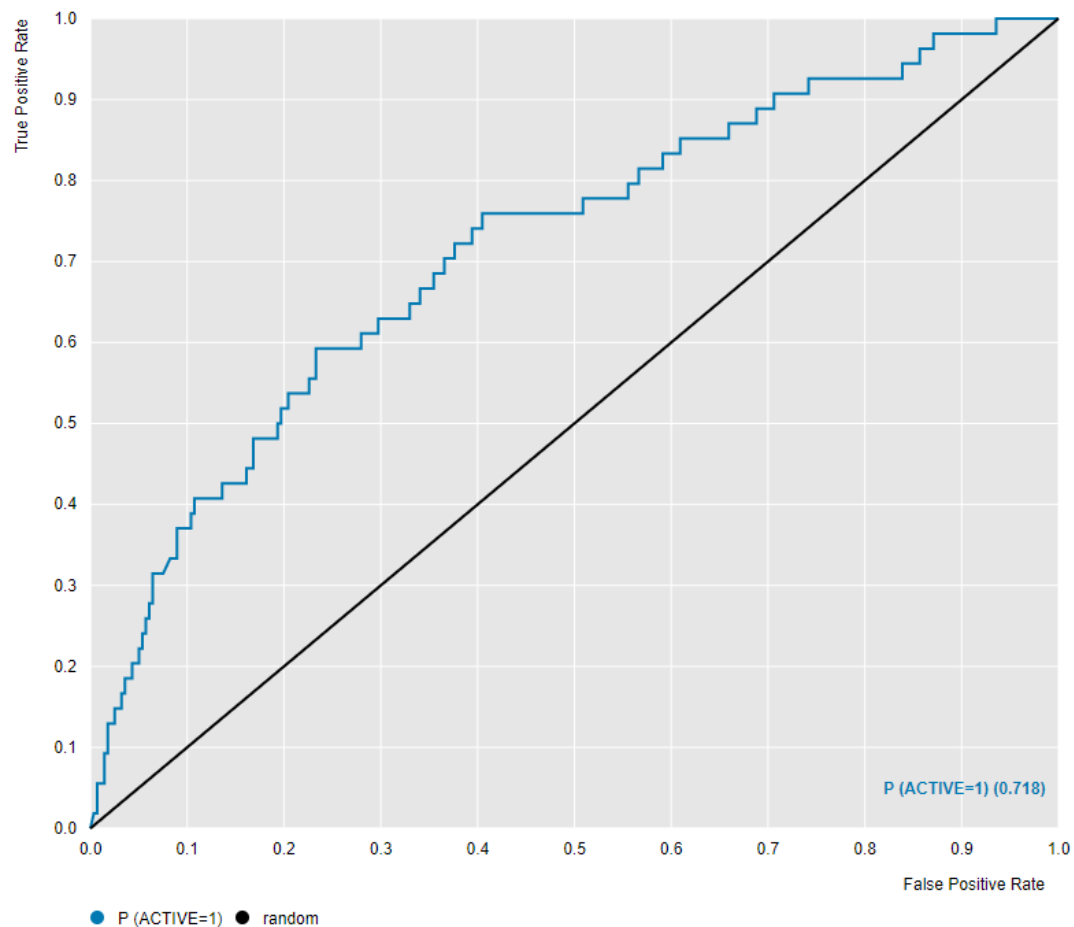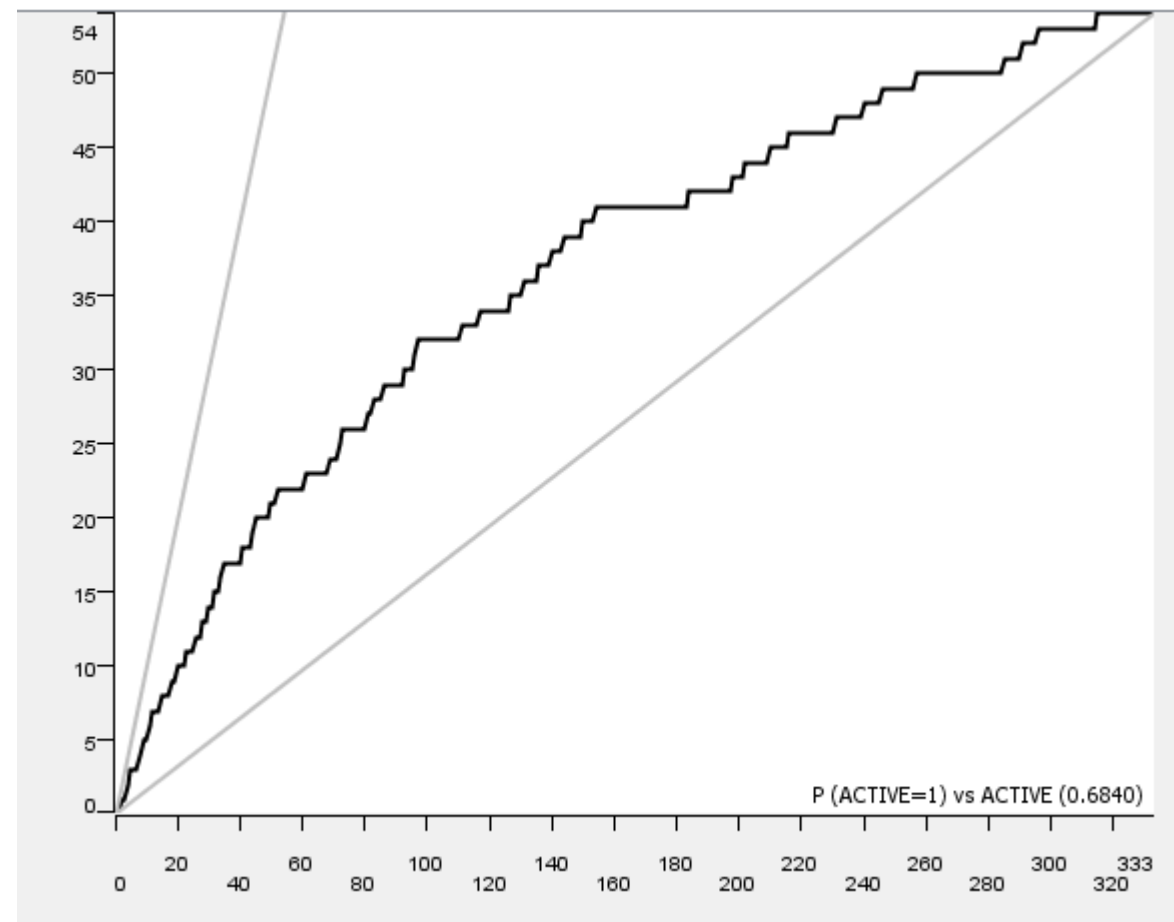

N=333

Top 10% Mean  
IC50

120 nM  
(two micromolar  
mistakes)

|          | Predicted Active | Predicted Inactive |
|----------|------------------|--------------------|
| Active   | 20               | 34                 |
| Inactive | 28               | 251                |

# PNN - <2.5 nM DefGood in Xa, 20% error

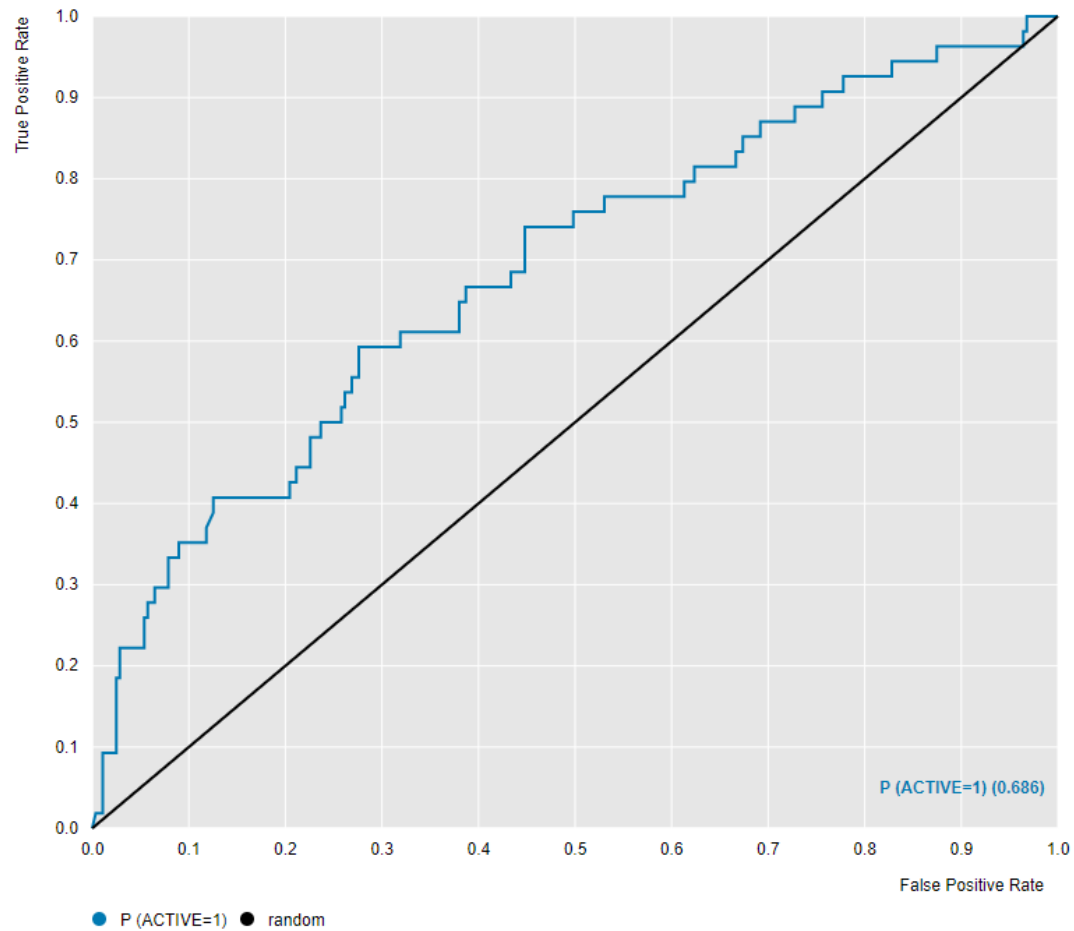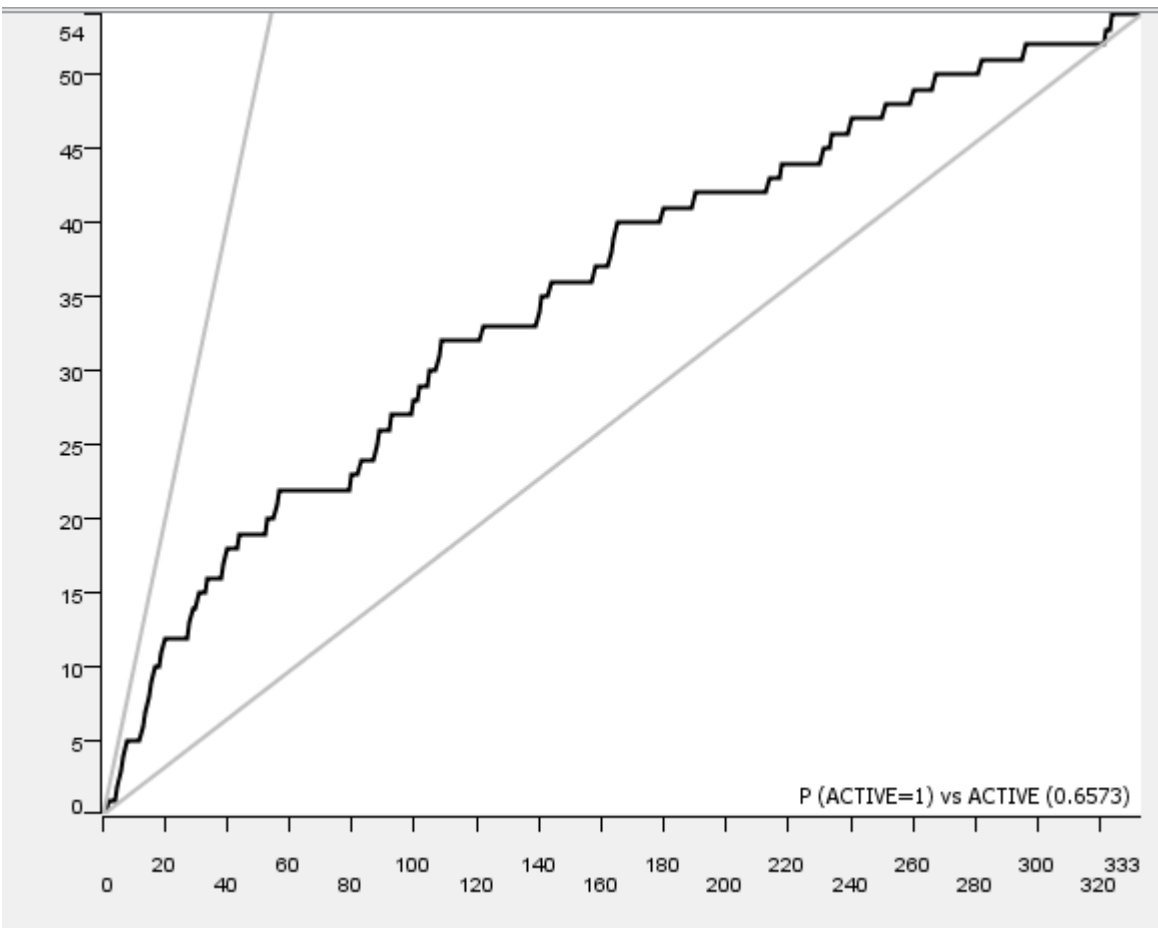

N=333

| Top 10% Mean IC50 | 89 nM |
|-------------------|-------|
|-------------------|-------|

|          | Predicted Active | Predicted Inactive |
|----------|------------------|--------------------|
| Active   | 22               | 32                 |
| Inactive | 39               | 240                |

# PNN - <2.5 nM DefGood in Xa, 25% error

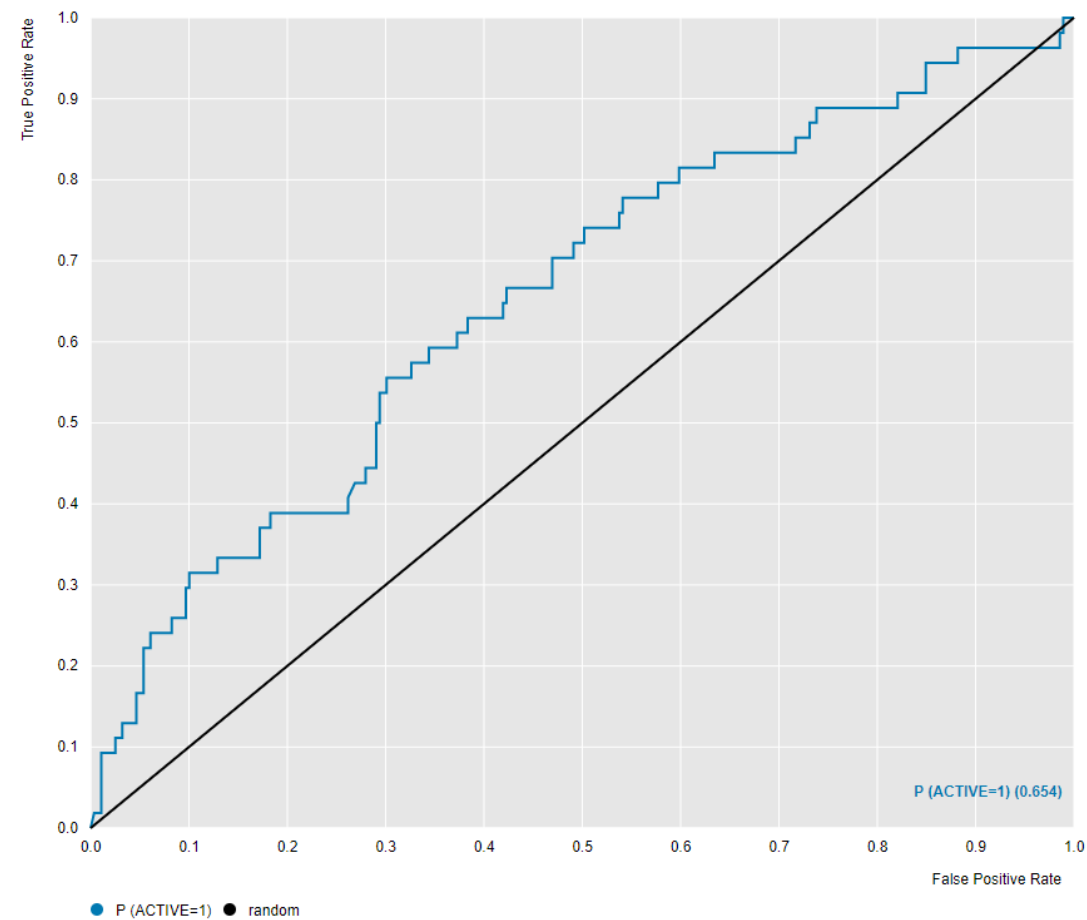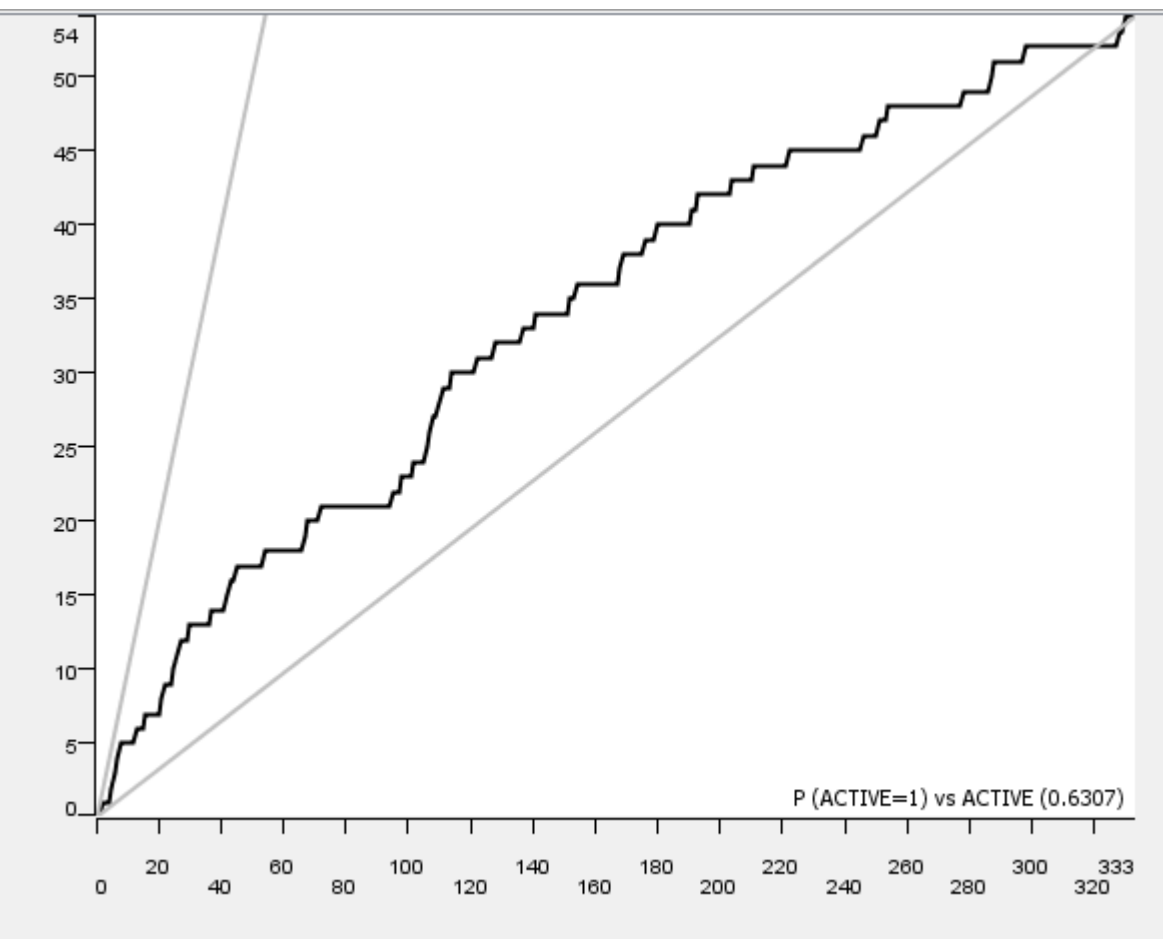

N=333

|                   |        |
|-------------------|--------|
| Top 10% Mean IC50 | 915 nM |
|-------------------|--------|

|          | Predicted Active | Predicted Inactive |
|----------|------------------|--------------------|
| Active   | 21               | 33                 |
| Inactive | 56               | 223                |

PNN - <2.5 nM DefGood in Xa, 5% error;  
Random seed = 429

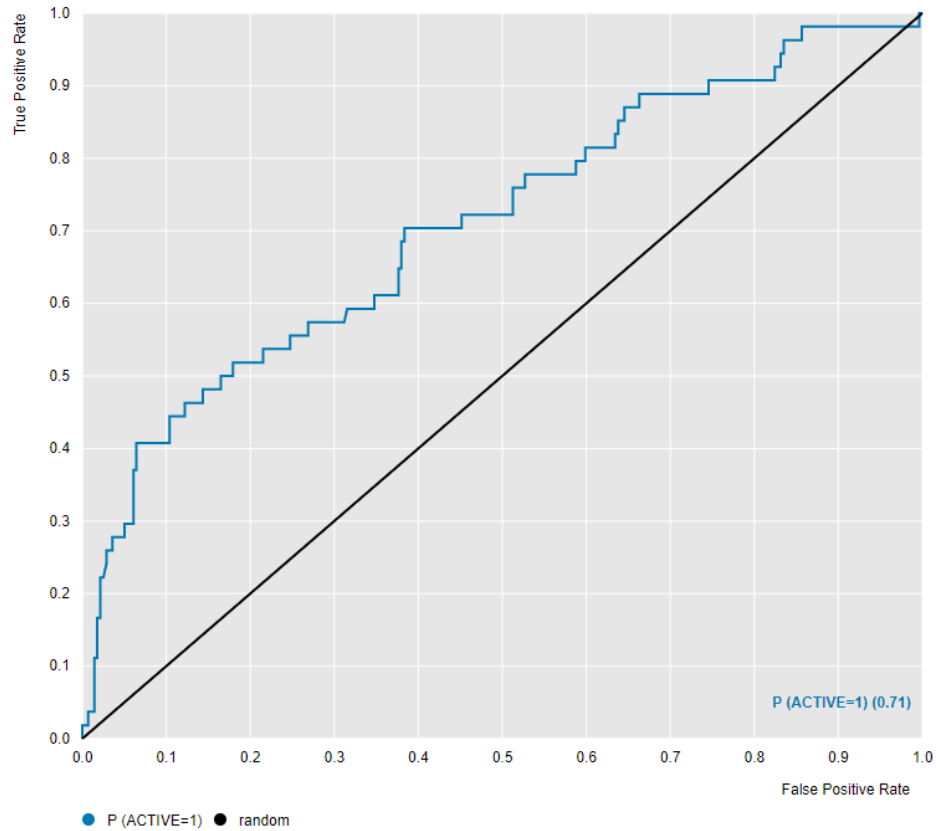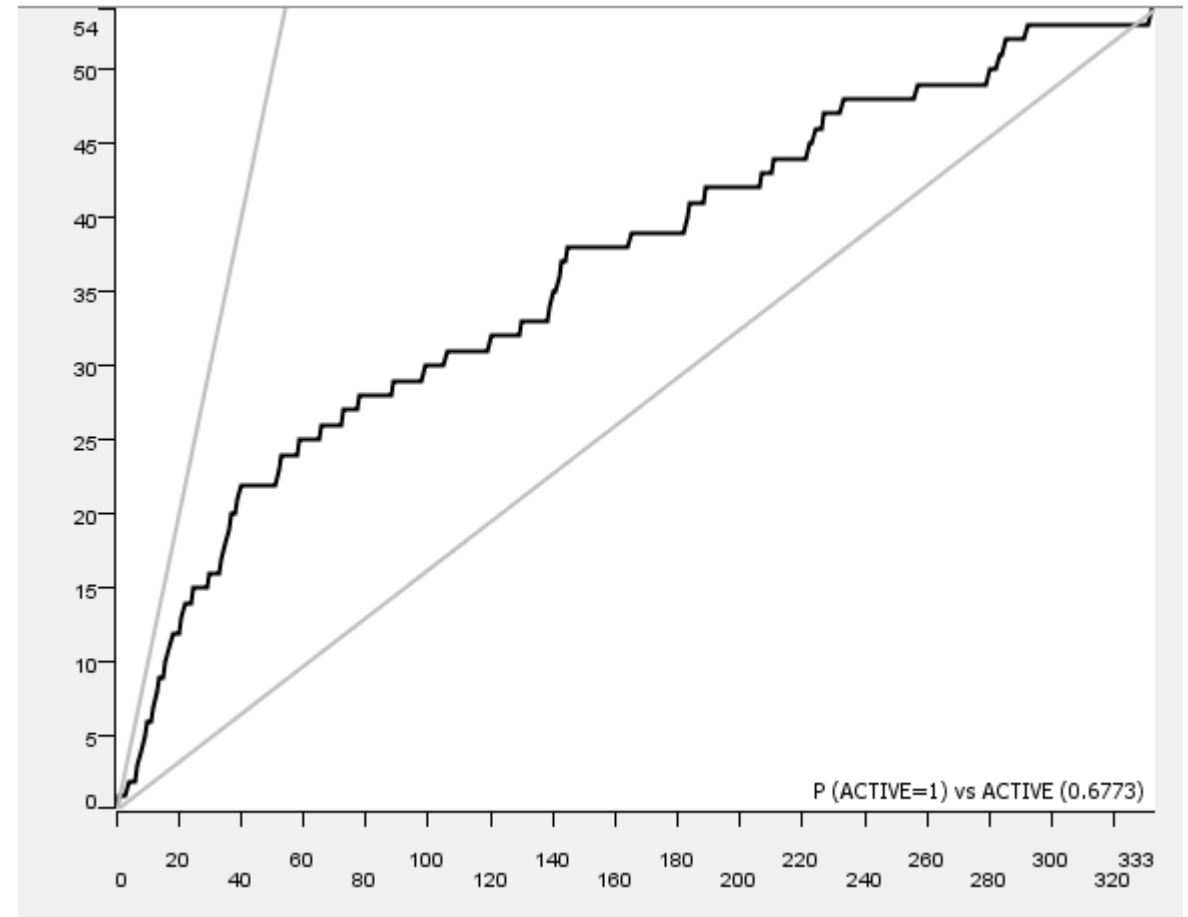

N=333

Top 10% Mean IC50

66.3 nM  
(one >800 nM  
Compound)

|          | Predicted Active | Predicted Inactive |
|----------|------------------|--------------------|
| Active   | 15               | 39                 |
| Inactive | 10               | 269                |

# PNN - <2.5 nM DefGood in Xa, 10% error; Random seed = 429

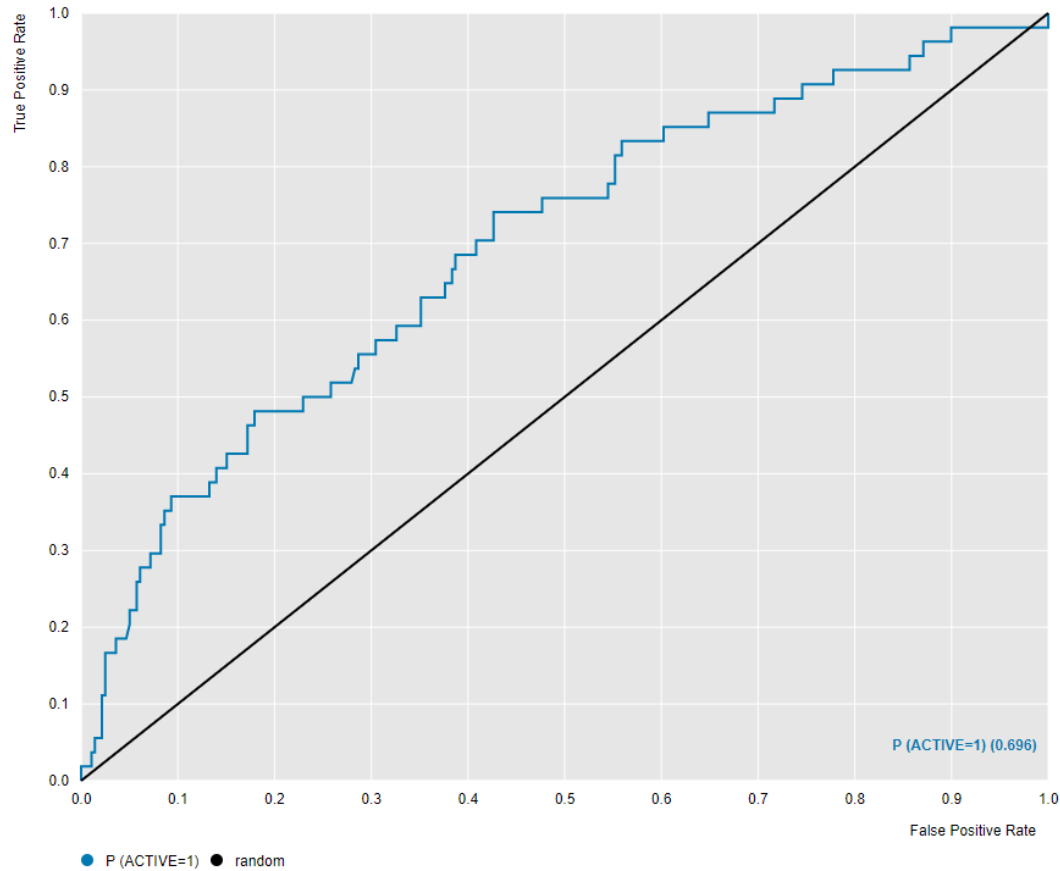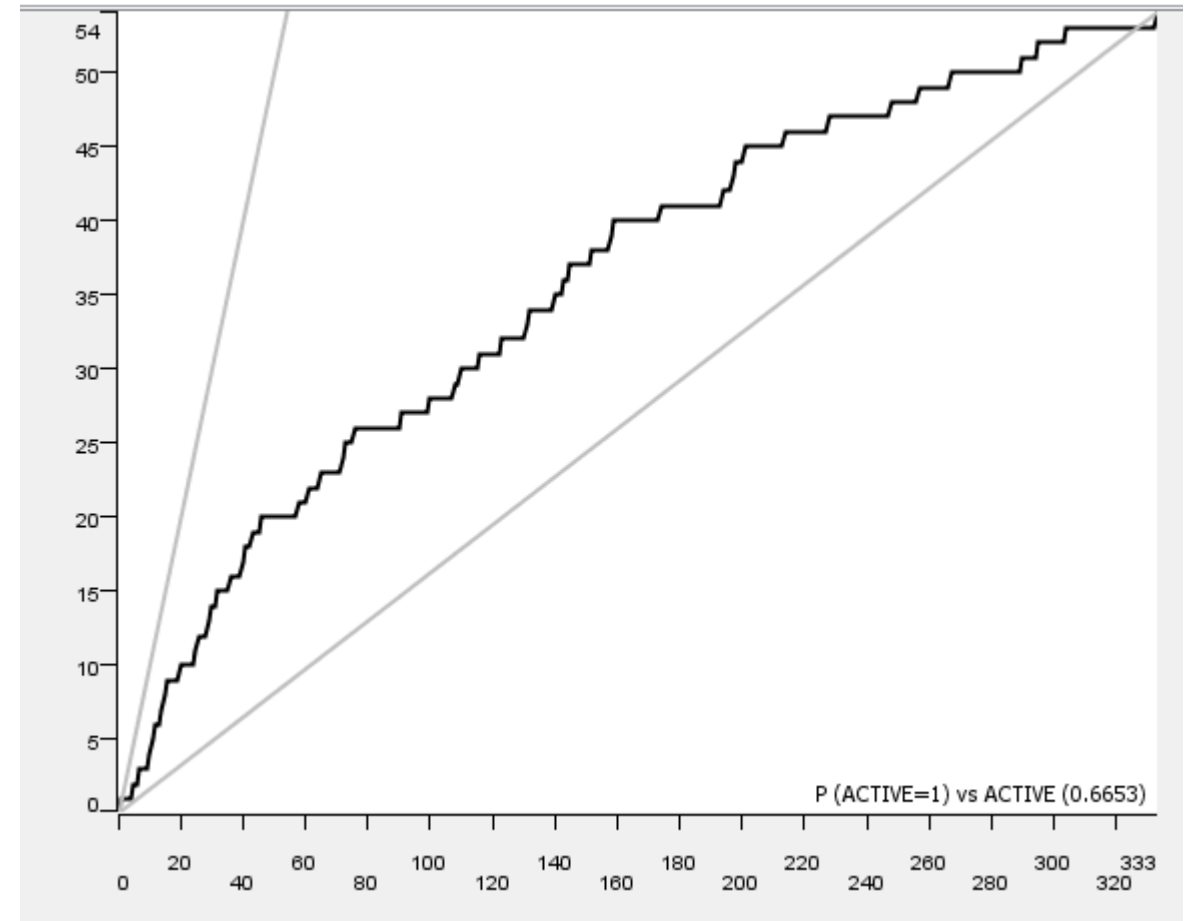

N=333

**Top 10% Mean  
IC50**

**145 nM  
(one >800 nM  
compound, and  
one >1,000 nM)**

|          | Predicted Active | Predicted Inactive |
|----------|------------------|--------------------|
| Active   | 12               | 42                 |
| Inactive | 15               | 264                |

PNN - <2.5 nM DefGood in Xa, 15% error;  
Random seed = 429

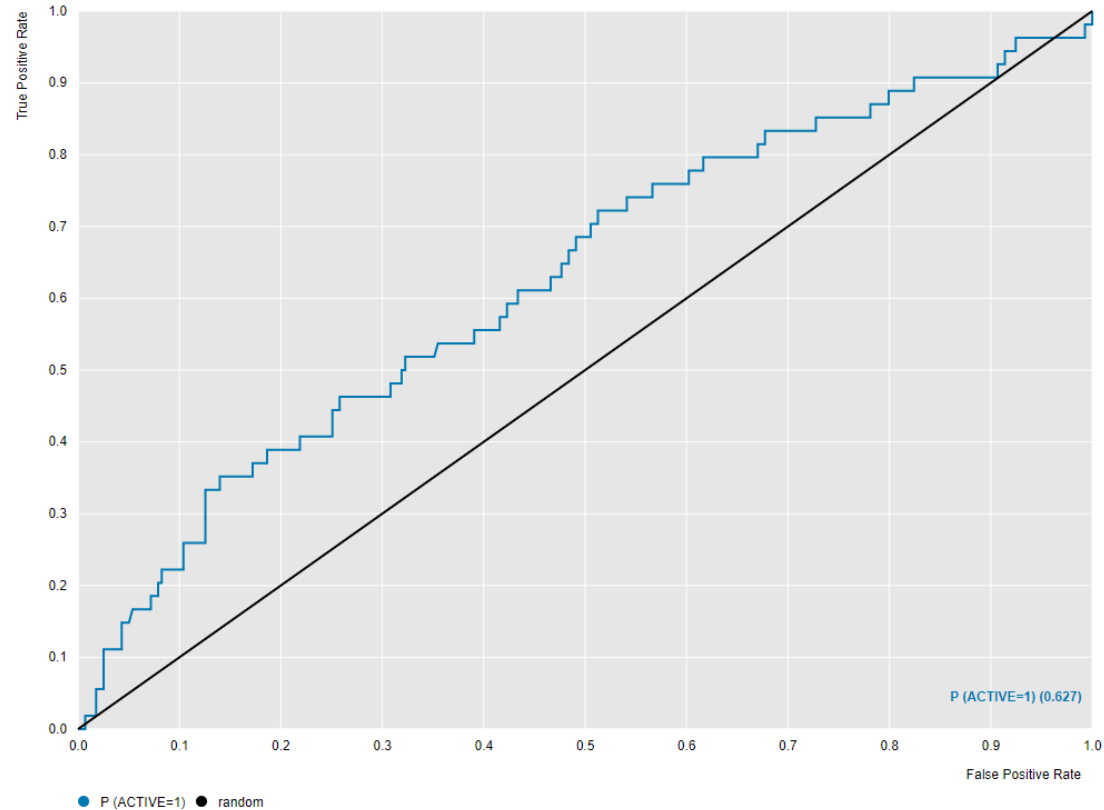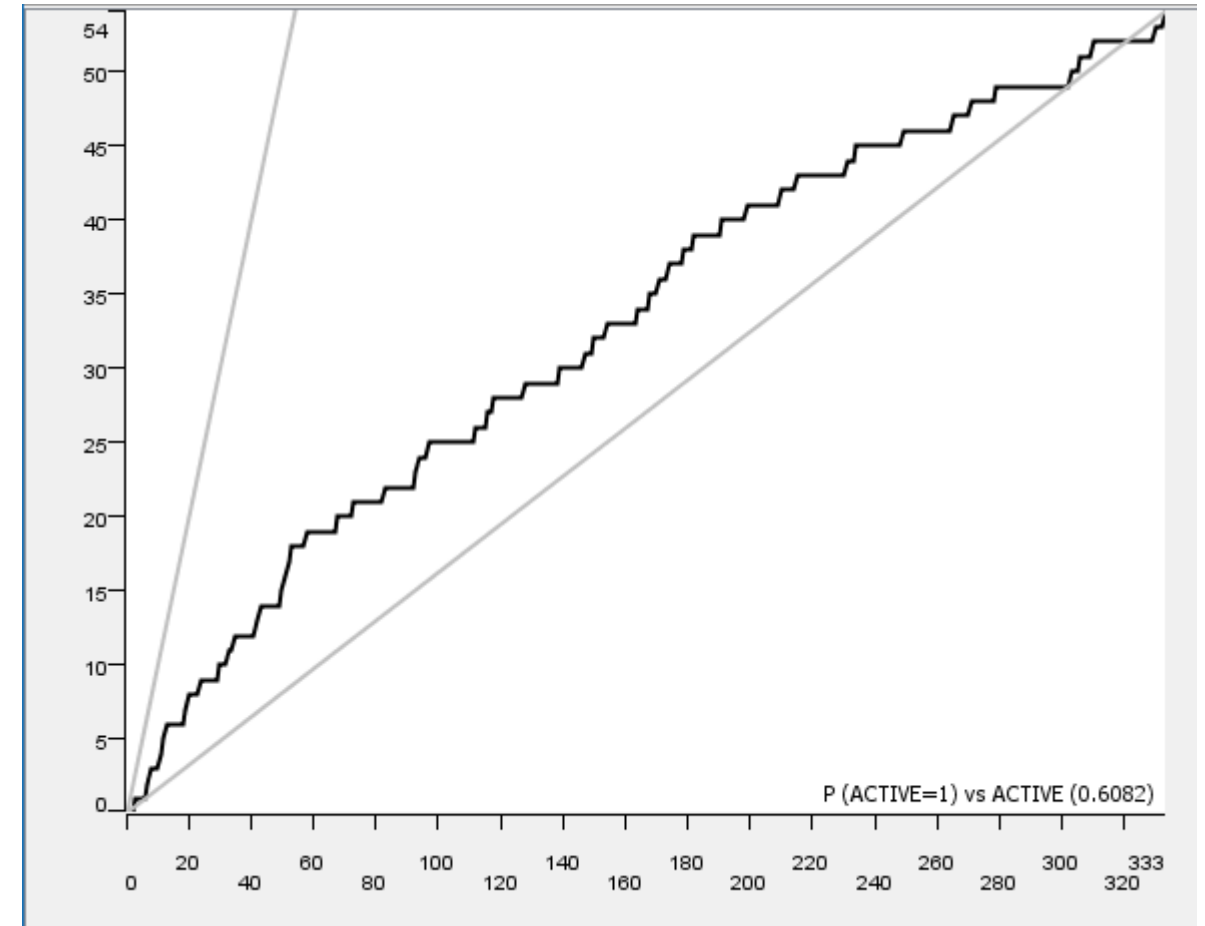

N=333

|                      |                                        |
|----------------------|----------------------------------------|
| Top 10% Mean<br>IC50 | 190 nM<br>(two micromolar<br>mistakes) |
|----------------------|----------------------------------------|

|          | Predicted Active | Predicted Inactive |
|----------|------------------|--------------------|
| Active   | 10               | 44                 |
| Inactive | 22               | 257                |

# PNN - <2.5 nM DefGood in Xa, 20% error ;

## Random seed = 429

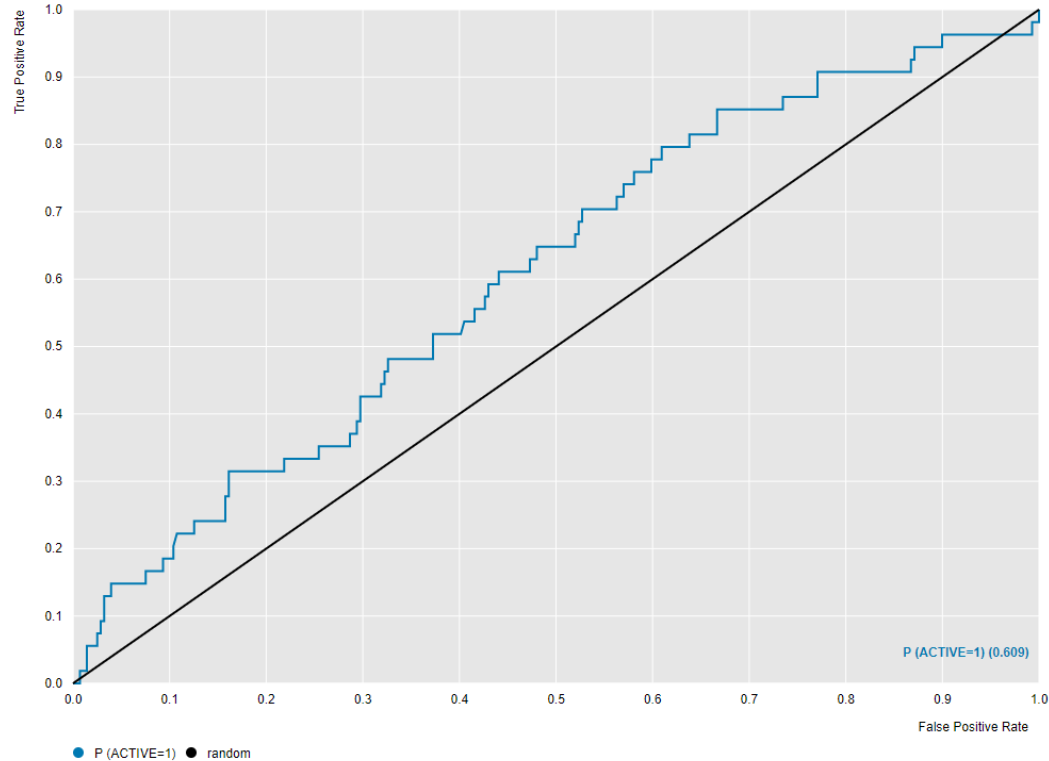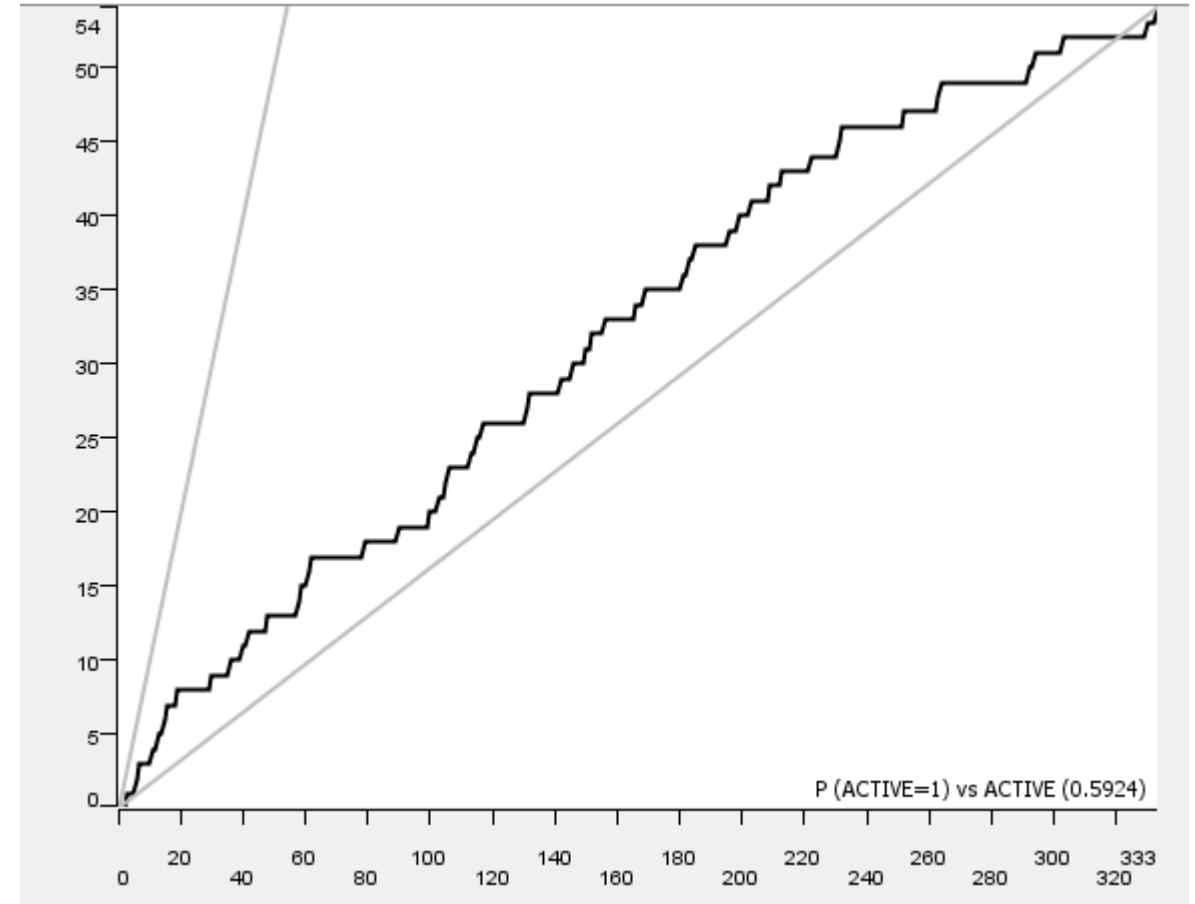

N=333

Top 10% Mean IC50

1,000 nM

|          | Predicted Active | Predicted Inactive |
|----------|------------------|--------------------|
| Active   | 10               | 44                 |
| Inactive | 27               | 252                |

PNN - <2.5 nM DefGood in Xa, 5% error;  
Random seed = 121783

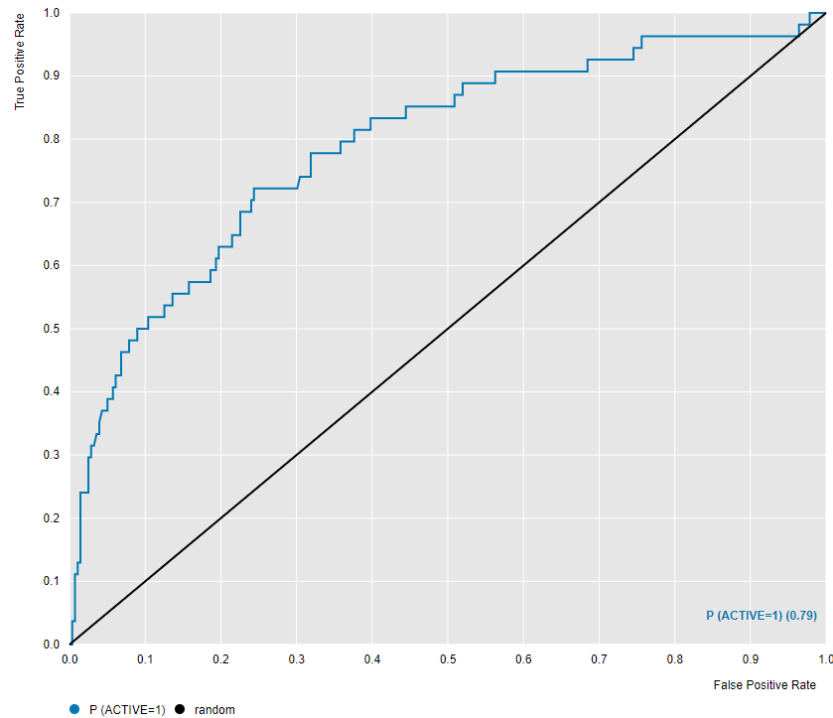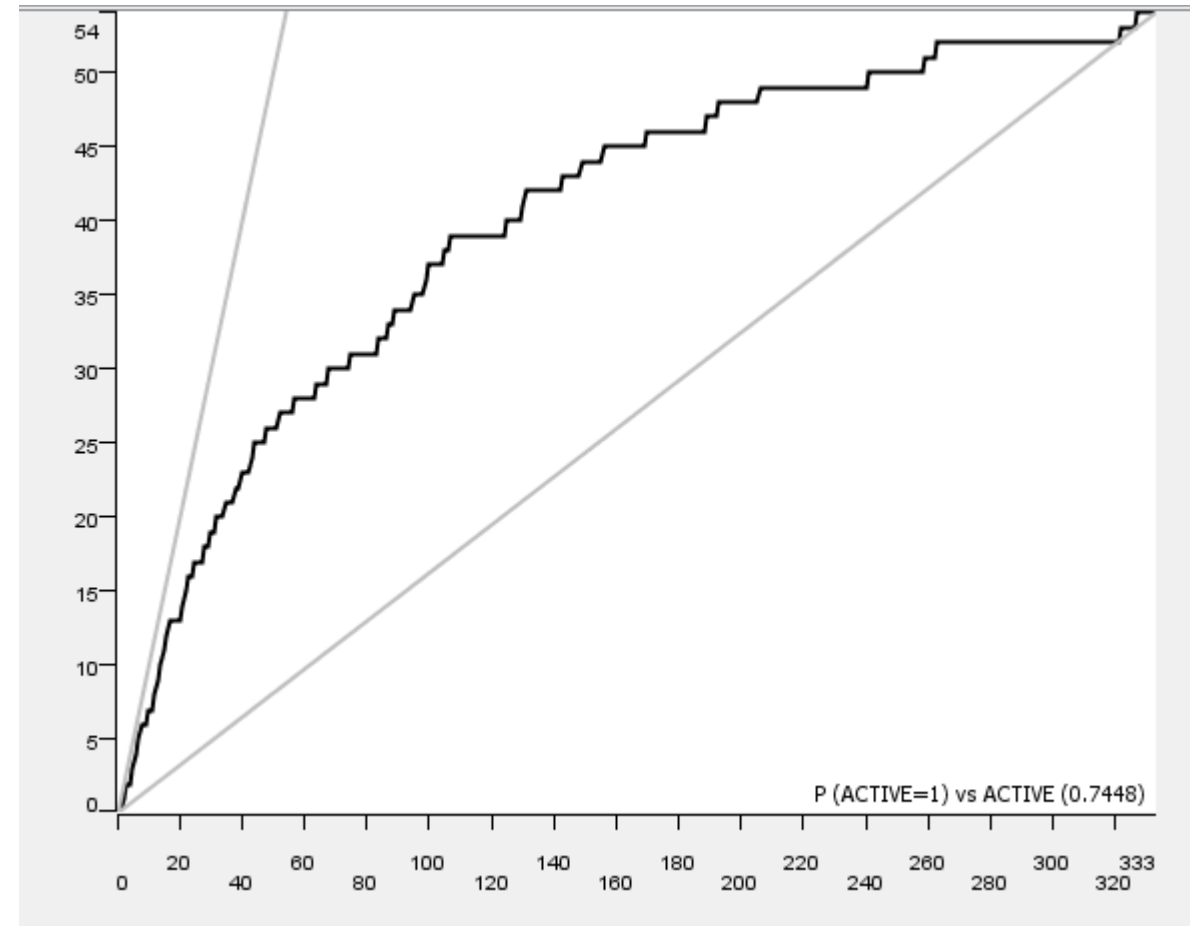

N=333

Top 10% Mean IC50

190 nM  
(2,500 nM  
compound is ranked  
first)

|          | Predicted Active | Predicted Inactive |
|----------|------------------|--------------------|
| Active   | 17               | 37                 |
| Inactive | 8                | 271                |



# PNN - <2.5 nM DefGood in Xa, 10% error; Random seed = 121783

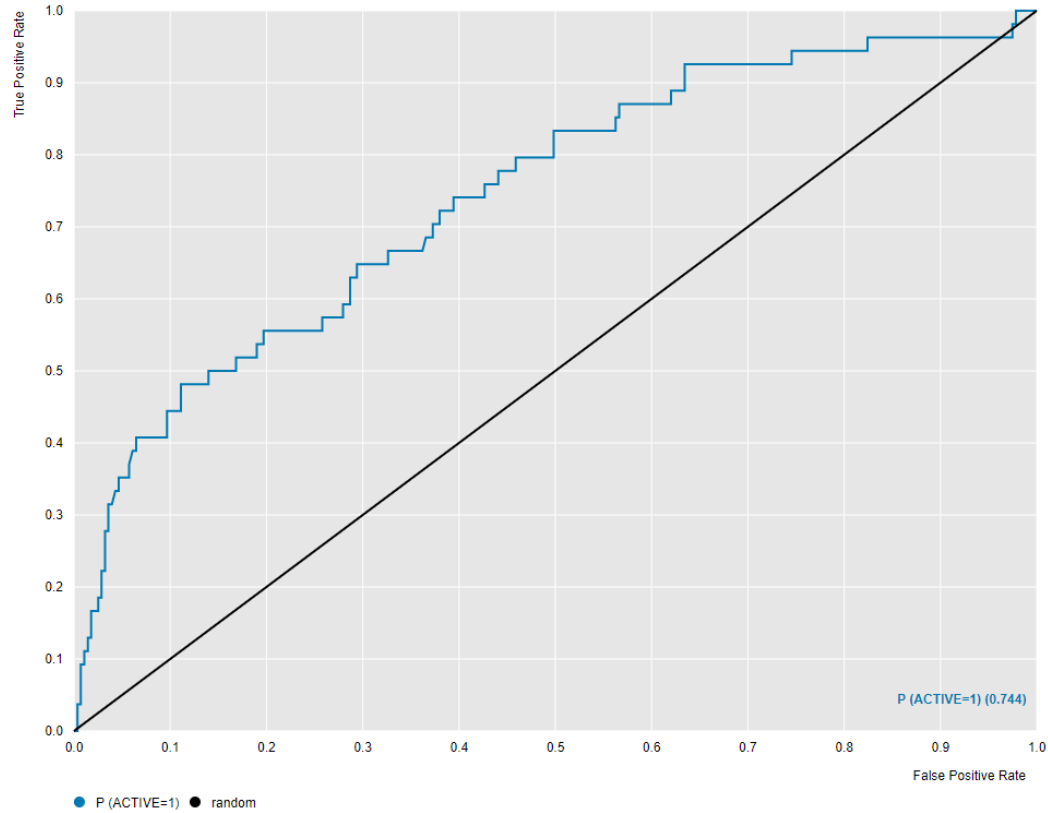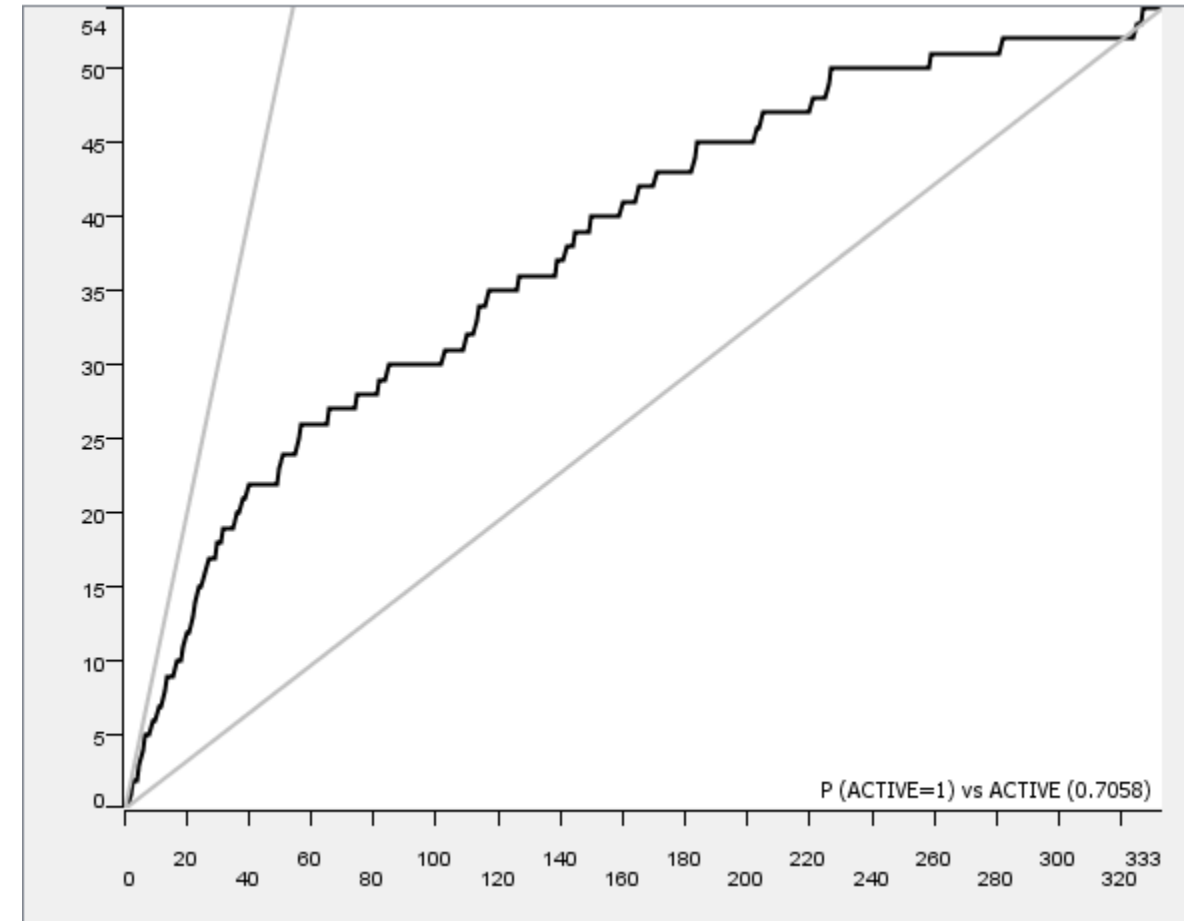

N=333

|                      |                                                     |
|----------------------|-----------------------------------------------------|
| Top 10% Mean<br>IC50 | 120 nM<br>(2,500 nM<br>compound is<br>ranked first) |
|----------------------|-----------------------------------------------------|

|          | Predicted Active | Predicted Inactive |
|----------|------------------|--------------------|
| Active   | 16               | 38                 |
| Inactive | 10               | 269                |

PNN - <2.5 nM DefGood in Xa, 15% error;  
Random seed = 121783

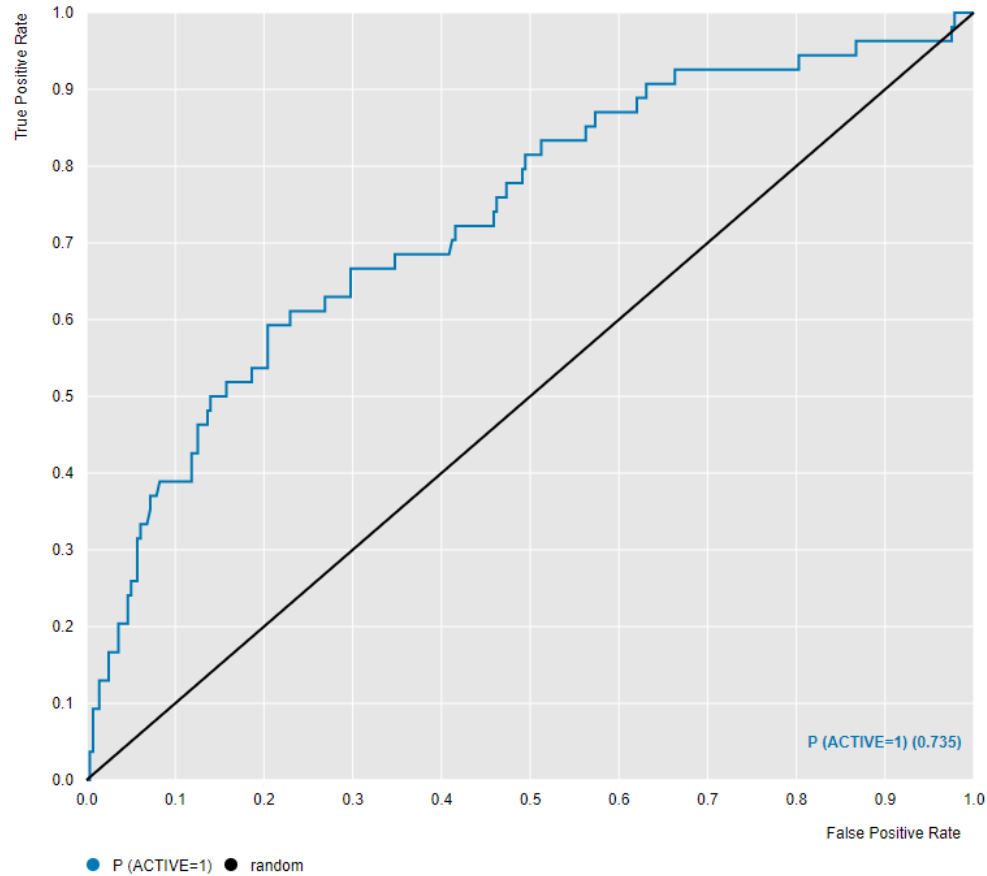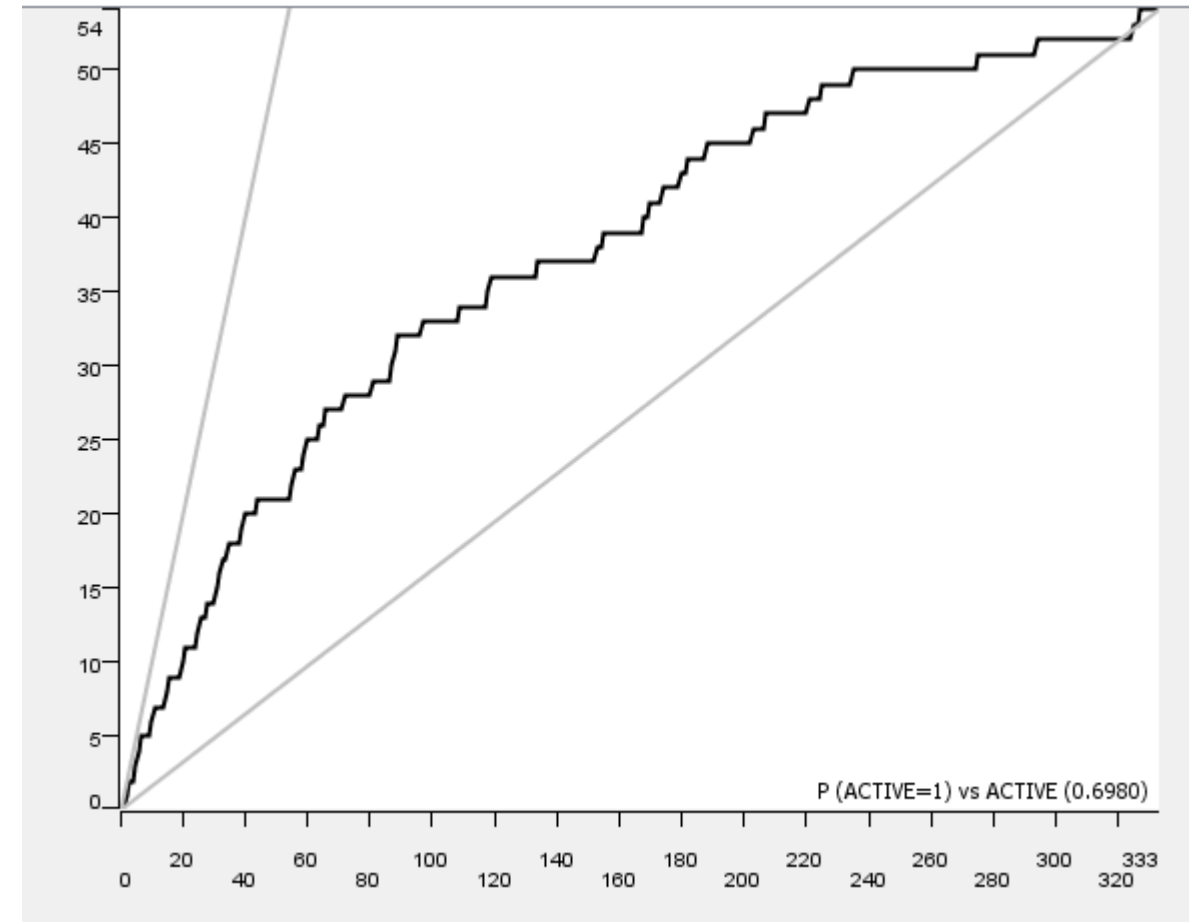

N=333

|                      |                                                     |
|----------------------|-----------------------------------------------------|
| Top 10% Mean<br>IC50 | 120 nM<br>(2,500 nM<br>compound is<br>ranked first) |
|----------------------|-----------------------------------------------------|

|          | Predicted Active | Predicted Inactive |
|----------|------------------|--------------------|
| Active   | 18               | 36                 |
| Inactive | 18               | 261                |

# PNN - <2.5 nM DefGood in Xa, 20% error; Random seed = 121783

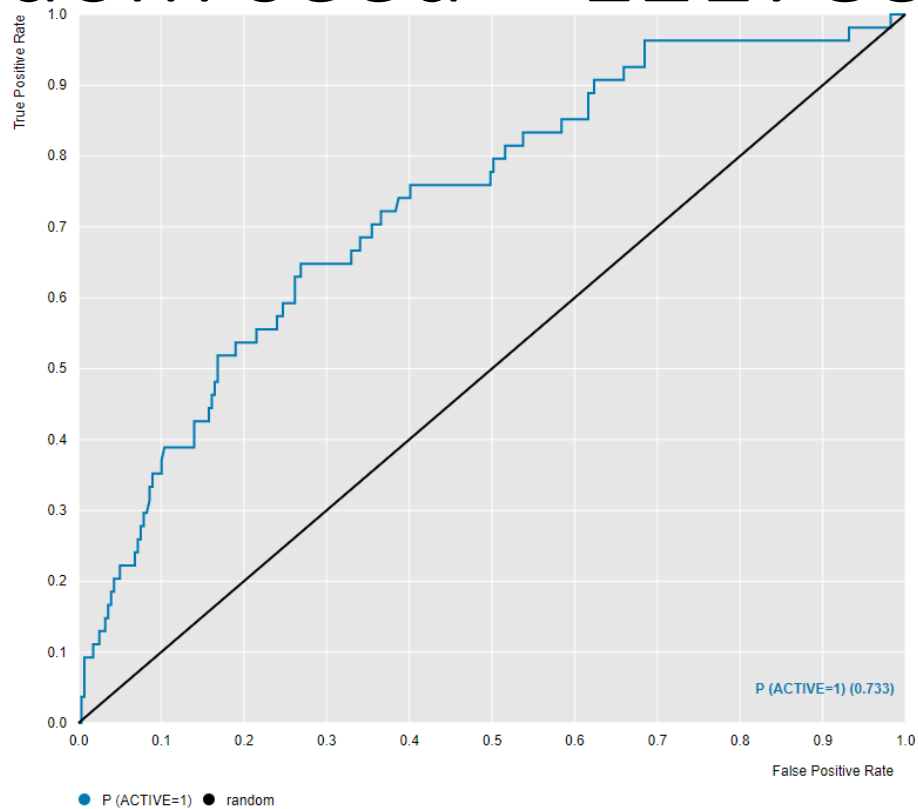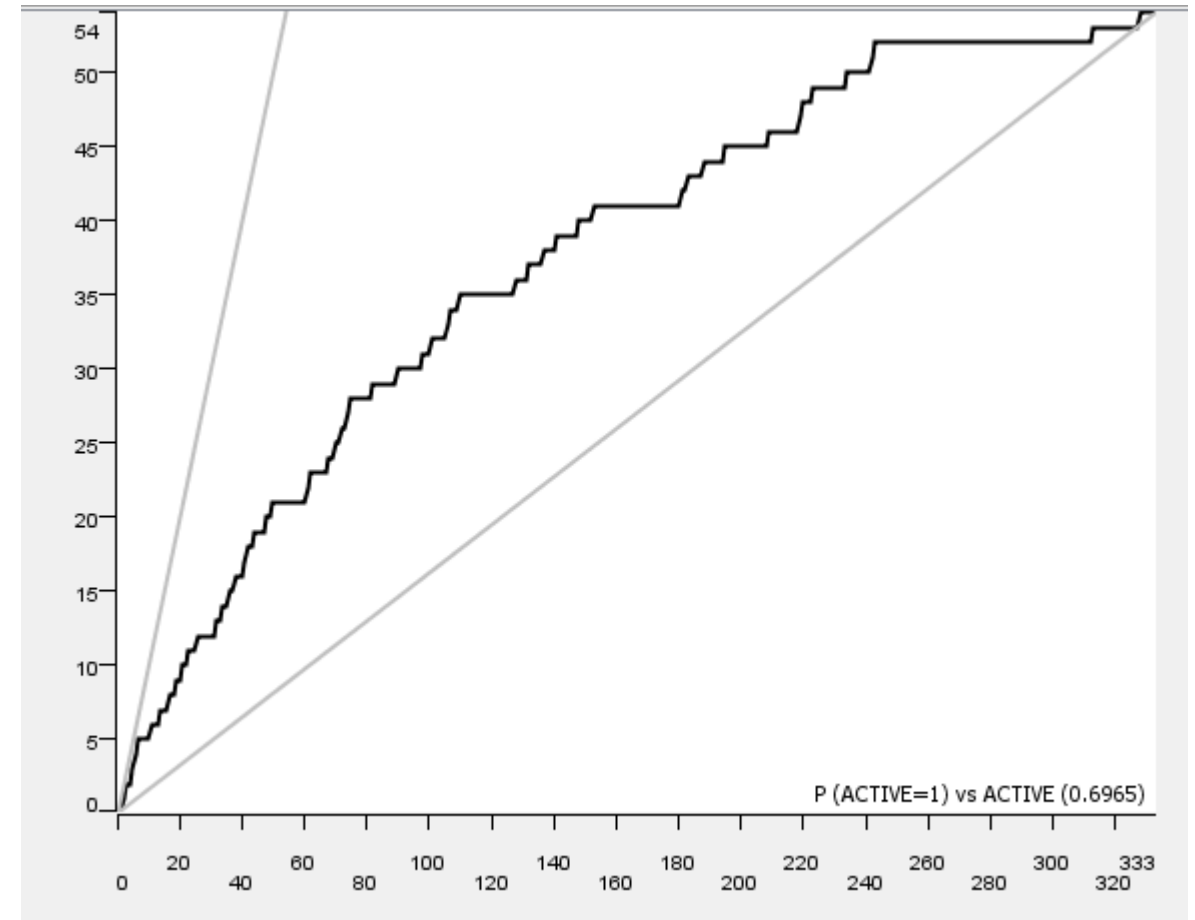

N=333

|                   |                                               |
|-------------------|-----------------------------------------------|
| Top 10% Mean IC50 | 210 nM<br>(2,500 nM compound is ranked first) |
|-------------------|-----------------------------------------------|

|          | Predicted Active | Predicted Inactive |
|----------|------------------|--------------------|
| Active   | 19               | 35                 |
| Inactive | 26               | 253                |

# PNN - <2.5 nM DefGood in Xa, 30% error; Random seed = 121783

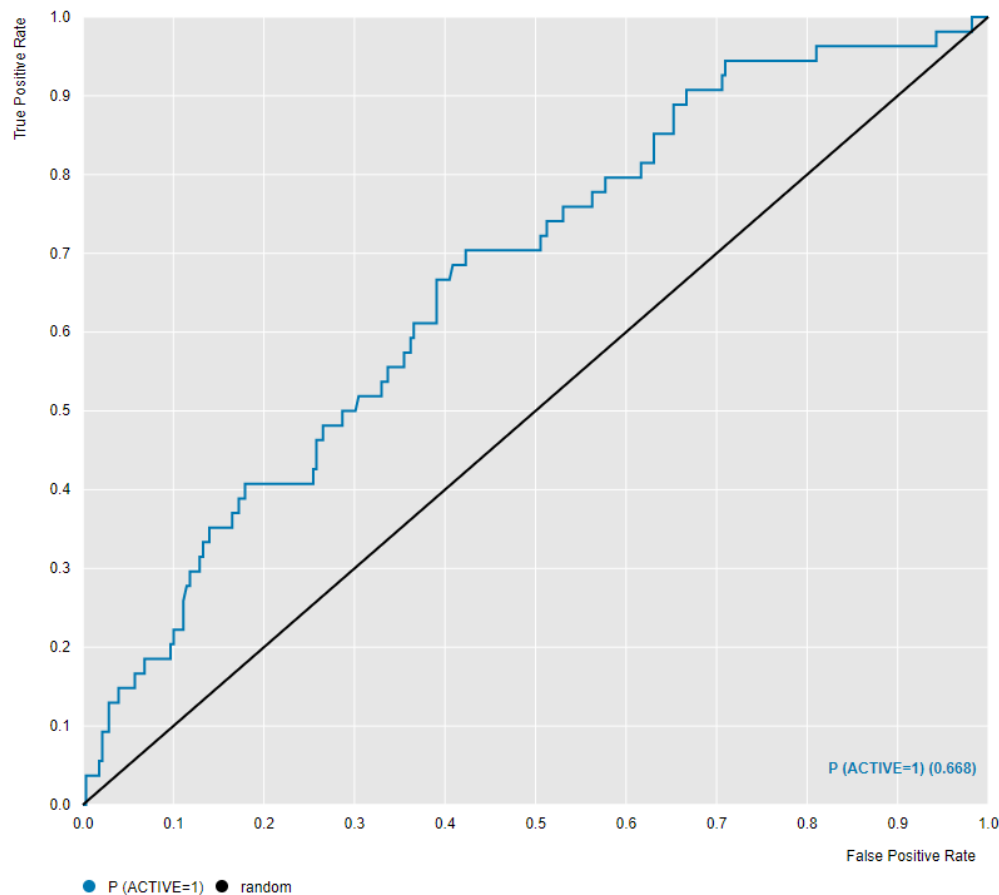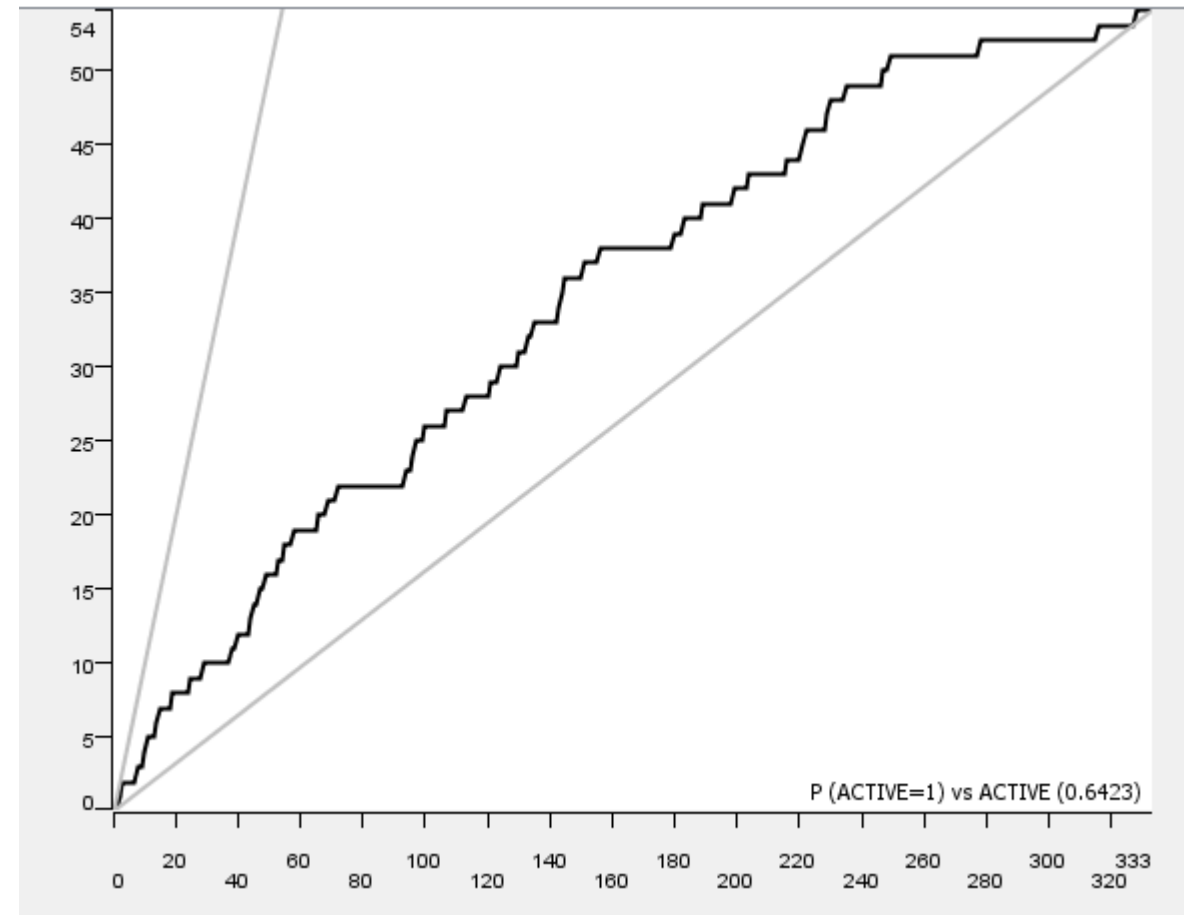

N=333

|                      |                                                     |
|----------------------|-----------------------------------------------------|
| Top 10% Mean<br>IC50 | 290 nM<br>(2,500 nM<br>compound is<br>ranked first) |
|----------------------|-----------------------------------------------------|

|          | Predicted Active | Predicted Inactive |
|----------|------------------|--------------------|
| Active   | 21               | 33                 |
| Inactive | 49               | 230                |

# PNN - <2.5 nM DefGood in Xa, 40% error; Random seed = 121783

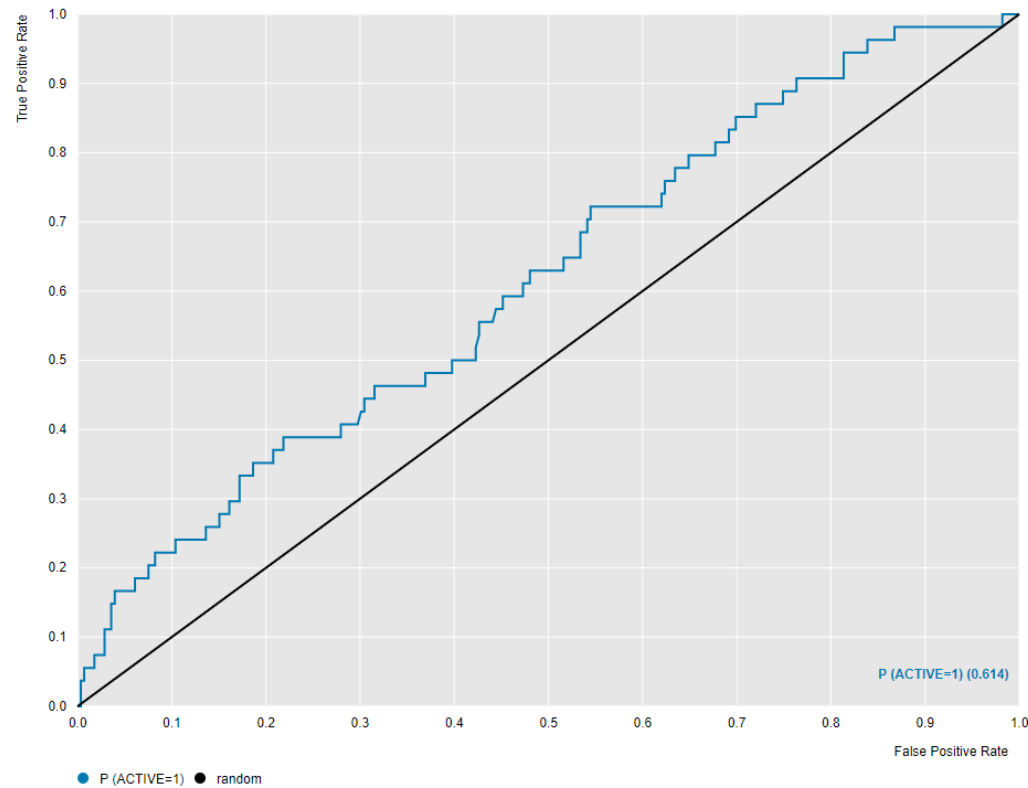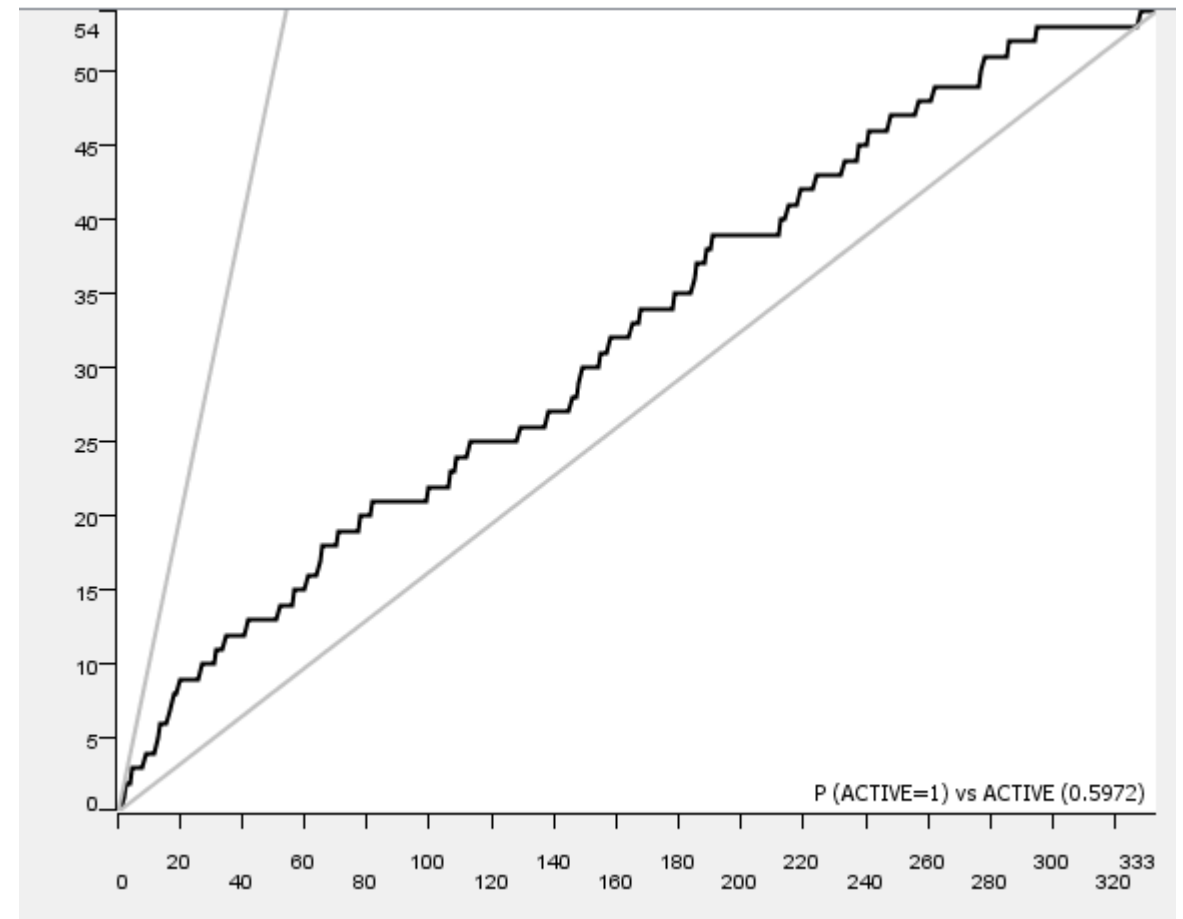

N=333

Top 10% Mean  
IC50

200 nM  
(2,500 nM  
compound is  
ranked first)

|          | Predicted Active | Predicted Inactive |
|----------|------------------|--------------------|
| Active   | 22               | 32                 |
| Inactive | 82               | 197                |

# PNN - <2.5 nM DefGood in Xa, 45% error; Random seed = 121783

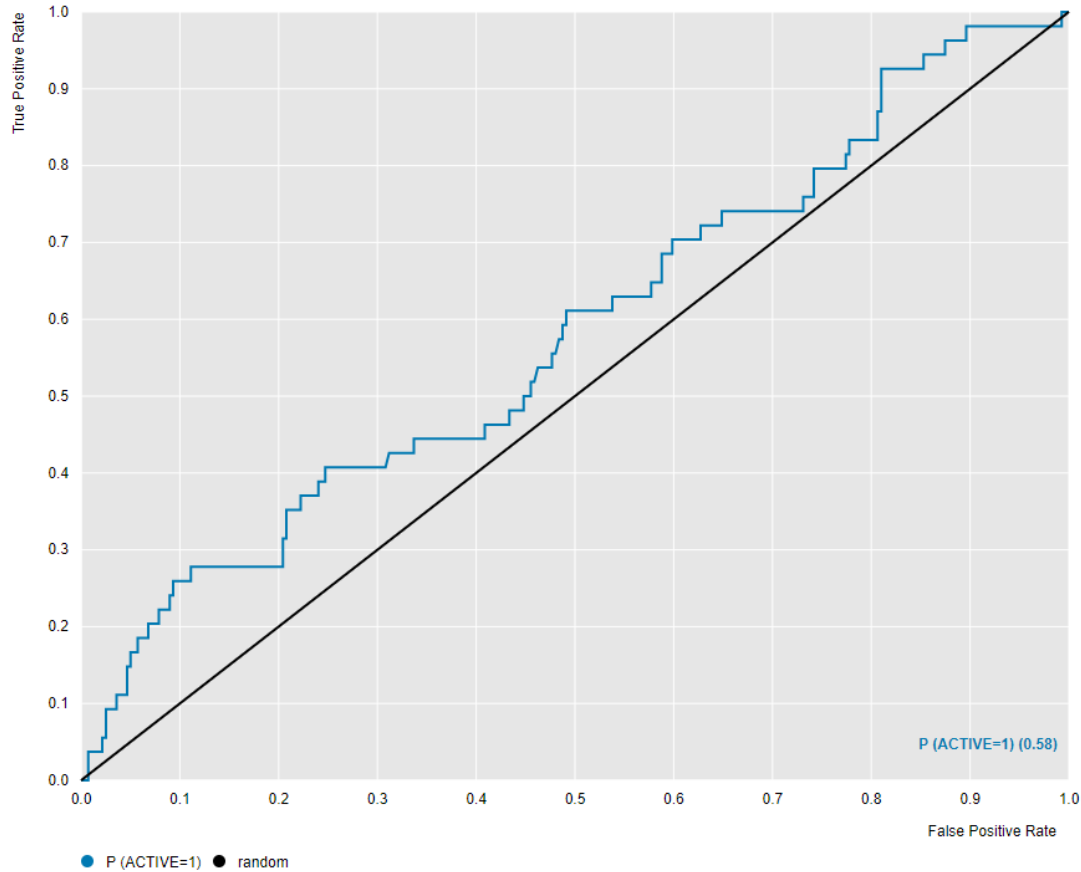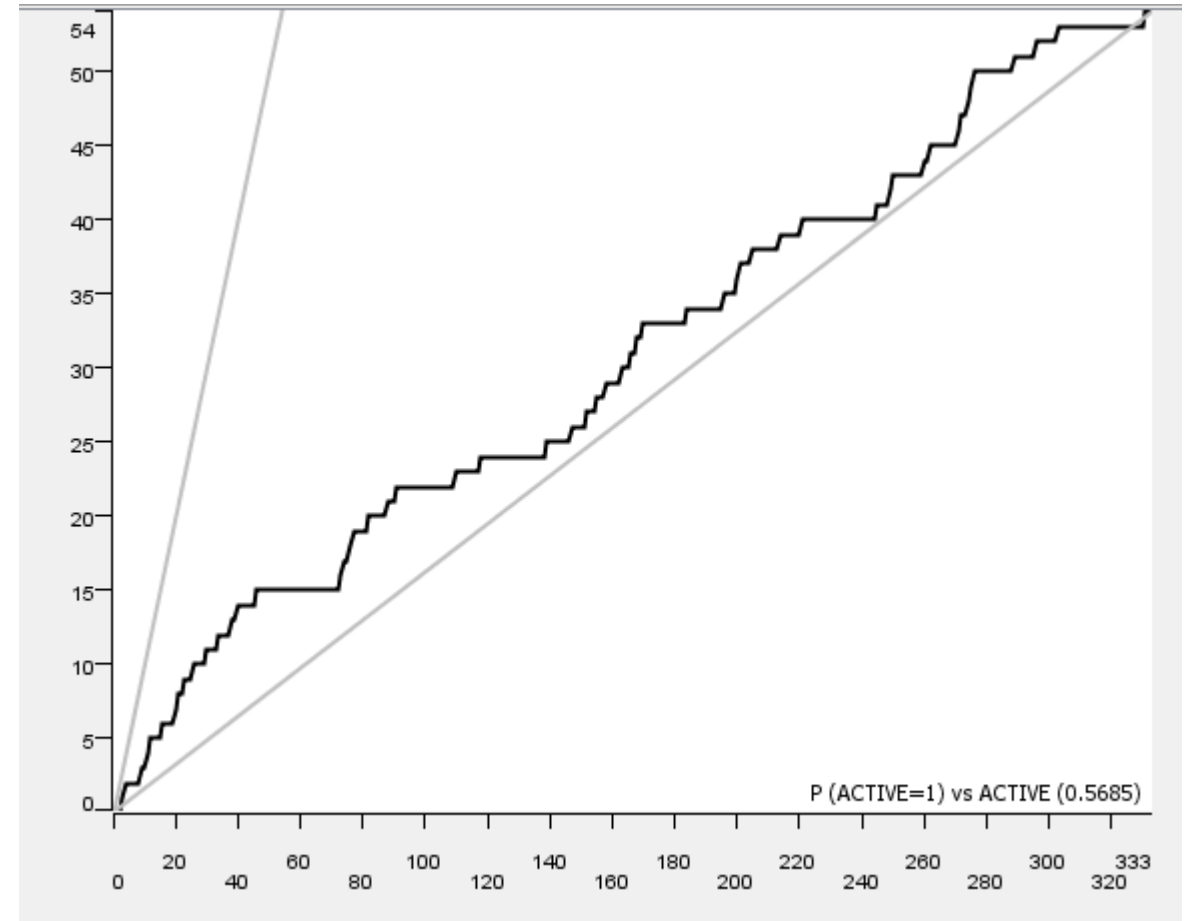

N=333

| Top 10% Mean<br>IC50 | 1,200 nM |
|----------------------|----------|
|----------------------|----------|

|          | Predicted Active | Predicted Inactive |
|----------|------------------|--------------------|
| Active   | 22               | 32                 |
| Inactive | 85               | 194                |

# Conclusion - PNN

- Across three random seeds, the % error that lead to a significant enrichment failure and/or top 10% IC50 increase in the retrospective test was 20%, 10% and 30% for each unique random seed.

# HIV Protease



# HIV Protease NBN Design

- Rules -  $\$RELATION\$ = "="$  OR  $\$IC50\$ > 999$  OR  $\$IC50\$ < 10 \Rightarrow TRUE$
- Sort ascending and remove duplicates
- $\$DESCRIPTION\$ MATCHES ".*strain.*"$  OR  $\$DESCRIPTION\$ MATCHES ".*V18.*"$  OR  $\$DESCRIPTION\$ MATCHES ".*NL4-3.*"$  OR  $\$DESCRIPTION\$ MATCHES ".*mutant.*"$  was removed
- DefGood scanned between 2.5 and 25 nM
- 80-20 split for both actives and inactives
- NBN – ECFP4 used Classifier where Prediction was Active = True
- Resulted in 2544 compounds after cleaning the data

# <2.5 nM DefGood in HIV Protease

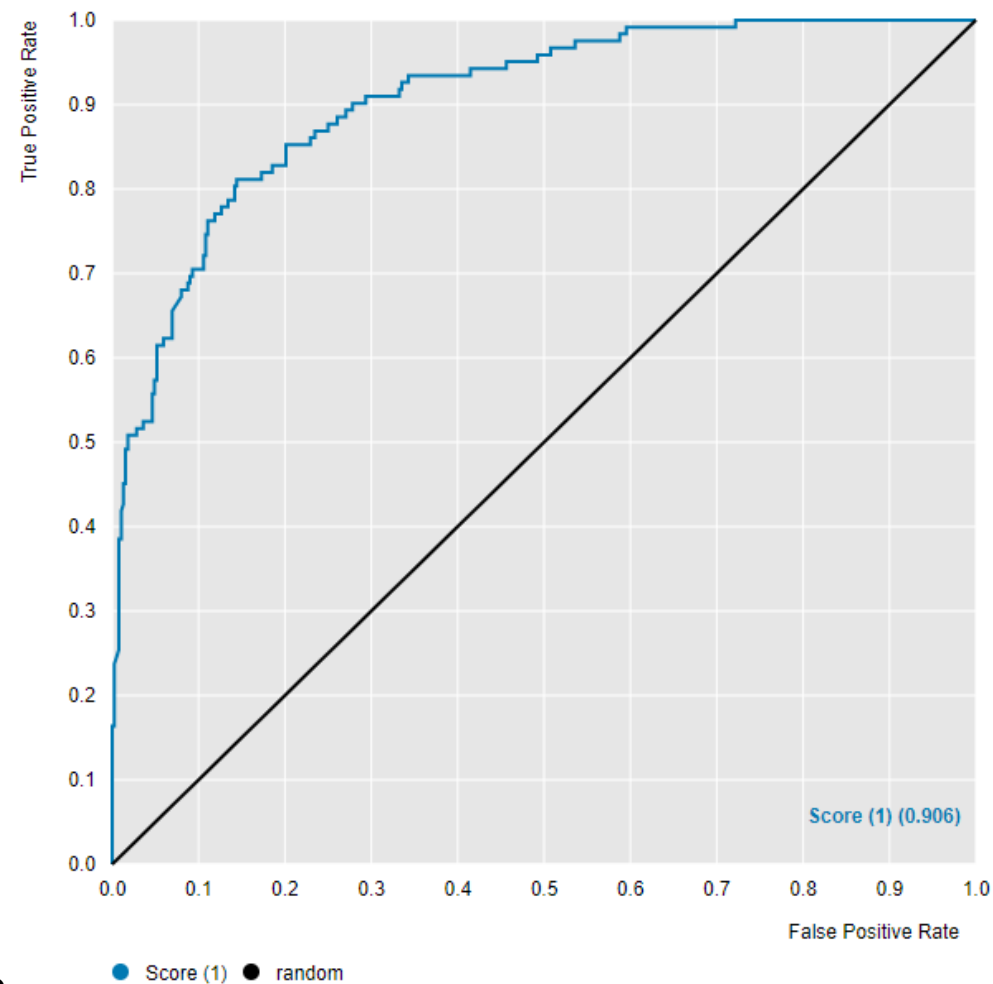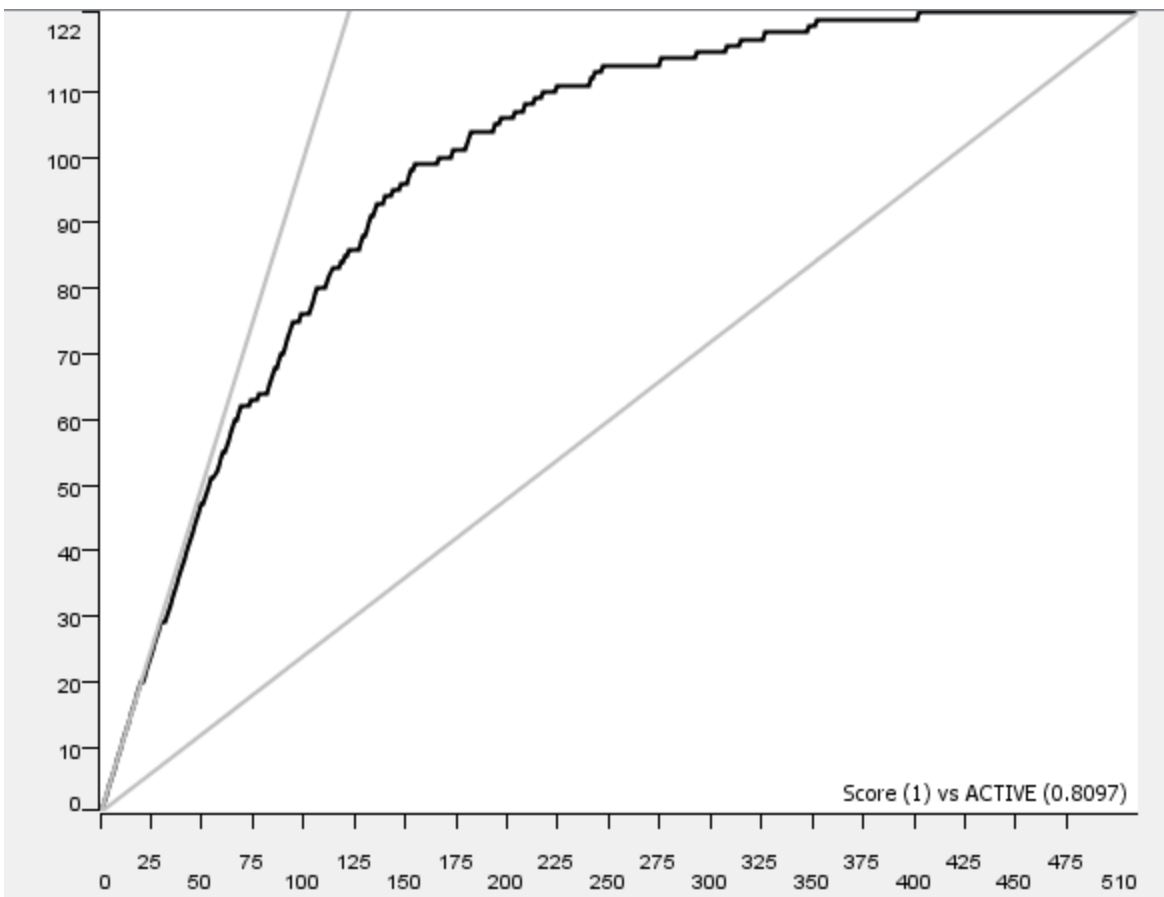

N=510

| Top 10% Mean IC50 | 8.31 nM |
|-------------------|---------|
|-------------------|---------|

|          | Predicted Active | Predicted Inactive |
|----------|------------------|--------------------|
| Active   | 111              | 11                 |
| Inactive | 114              | 274                |

# <5 nM DefGood in HIV Protease

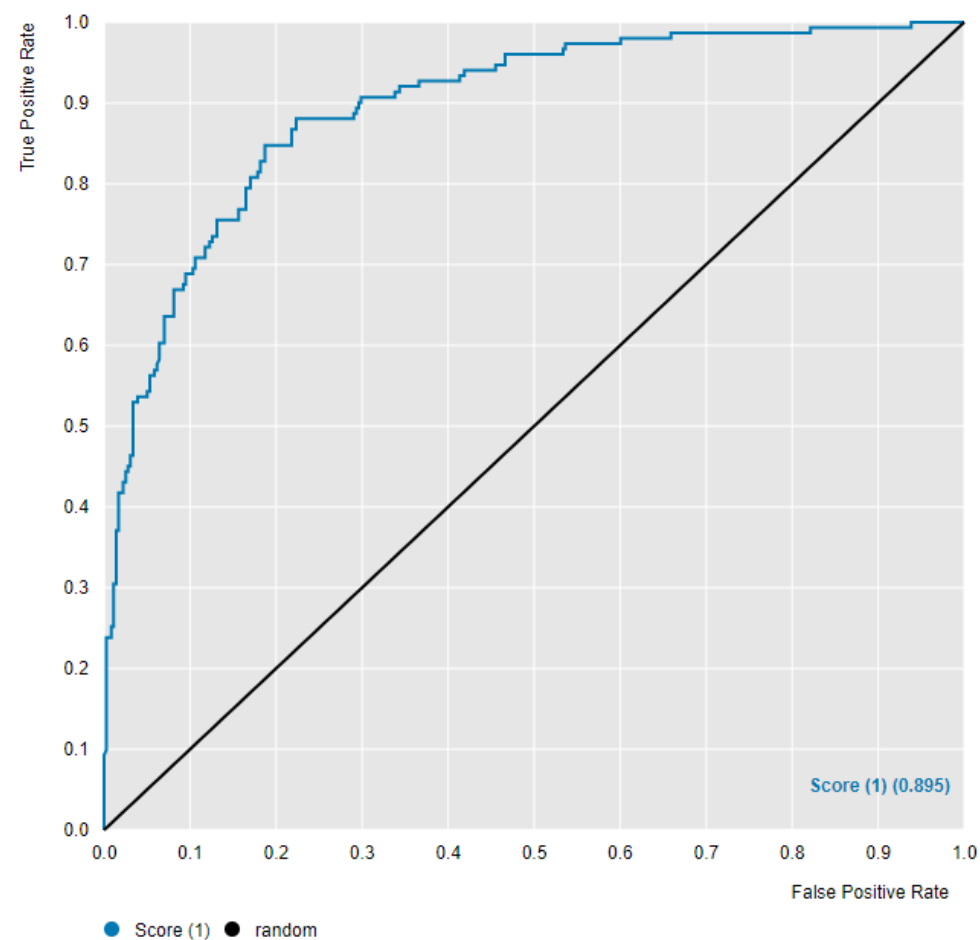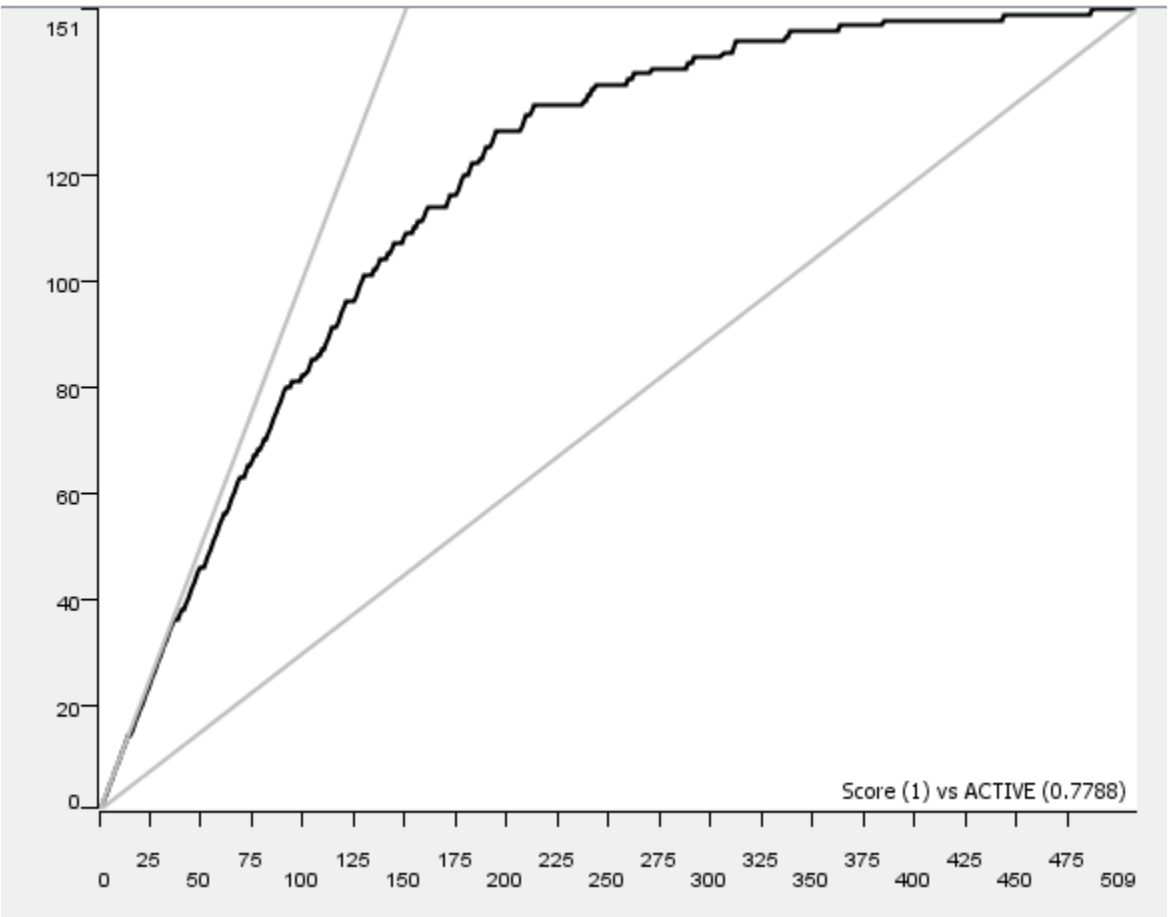

N=509

|                   |         |
|-------------------|---------|
| Top 10% Mean IC50 | 15.0 nM |
|-------------------|---------|

|          | Predicted Active | Predicted Inactive |
|----------|------------------|--------------------|
| Active   | 123              | 28                 |
| Inactive | 65               | 293                |

# <10 nM DefGood in HIV Protease

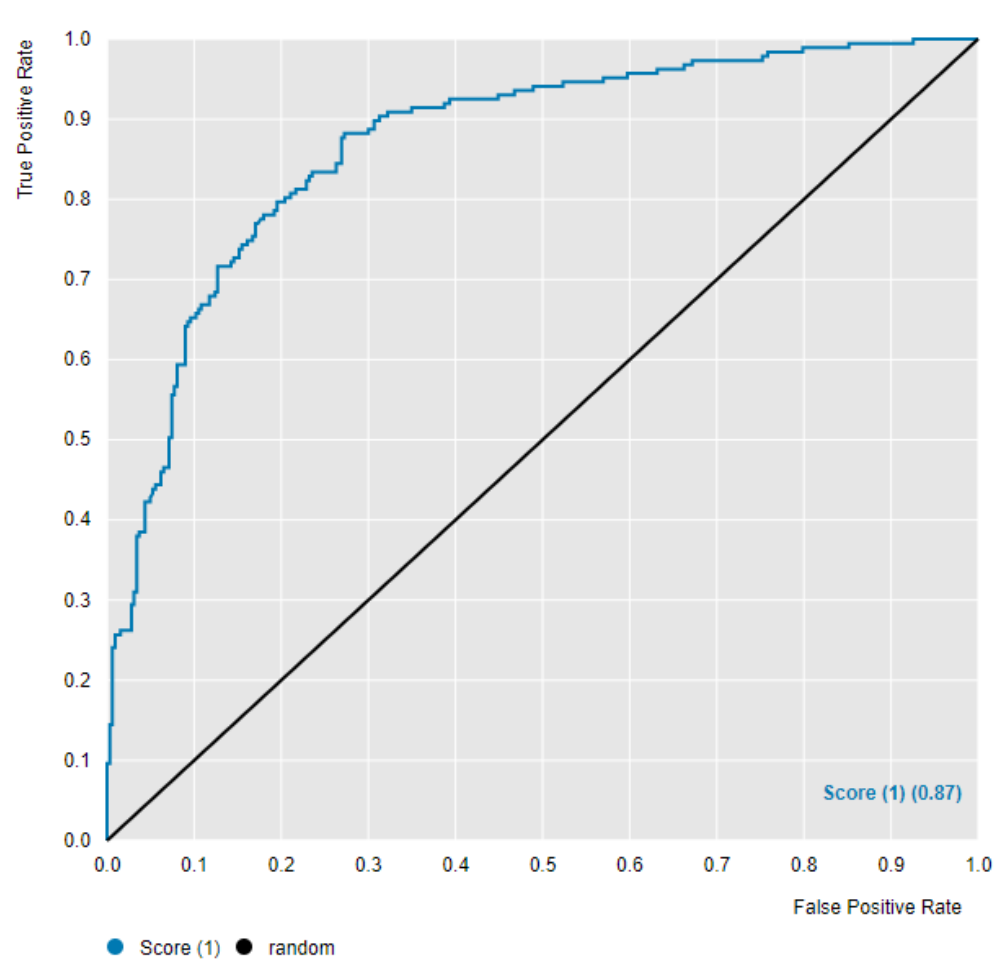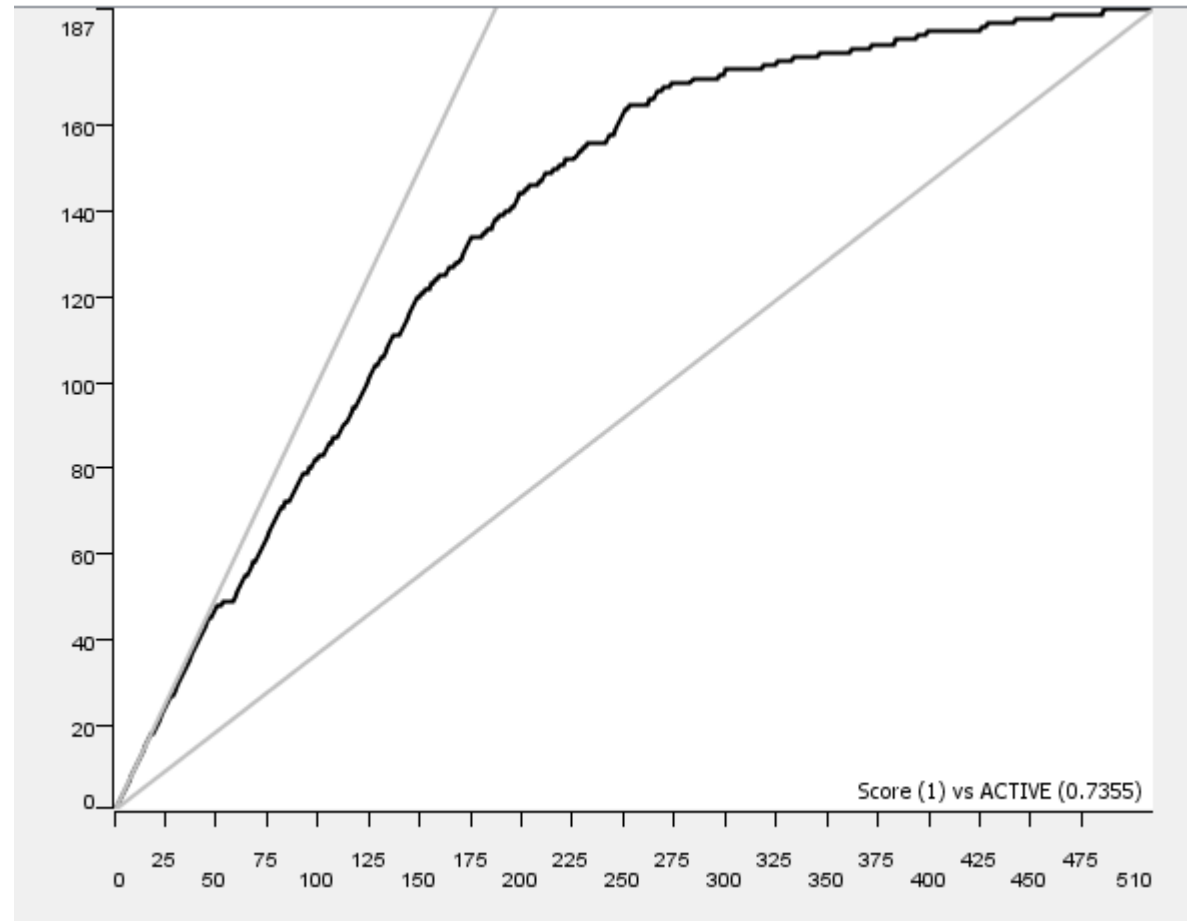

N=510

|                      |        |
|----------------------|--------|
| Top 10% Mean<br>IC50 | 2.9 nM |
|----------------------|--------|

|          | Predicted Active | Predicted Inactive |
|----------|------------------|--------------------|
| Active   | 166              | 21                 |
| Inactive | 98               | 255                |

# <15 nM DefGood in HIV Protease

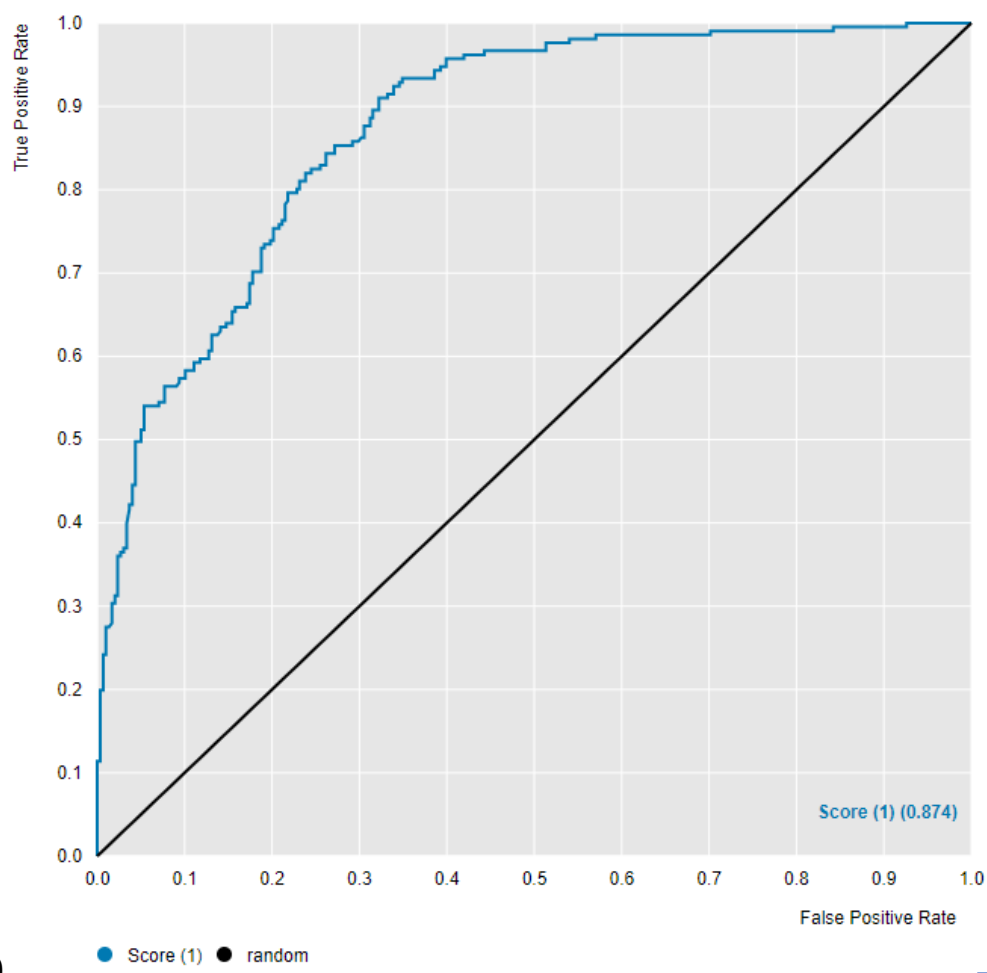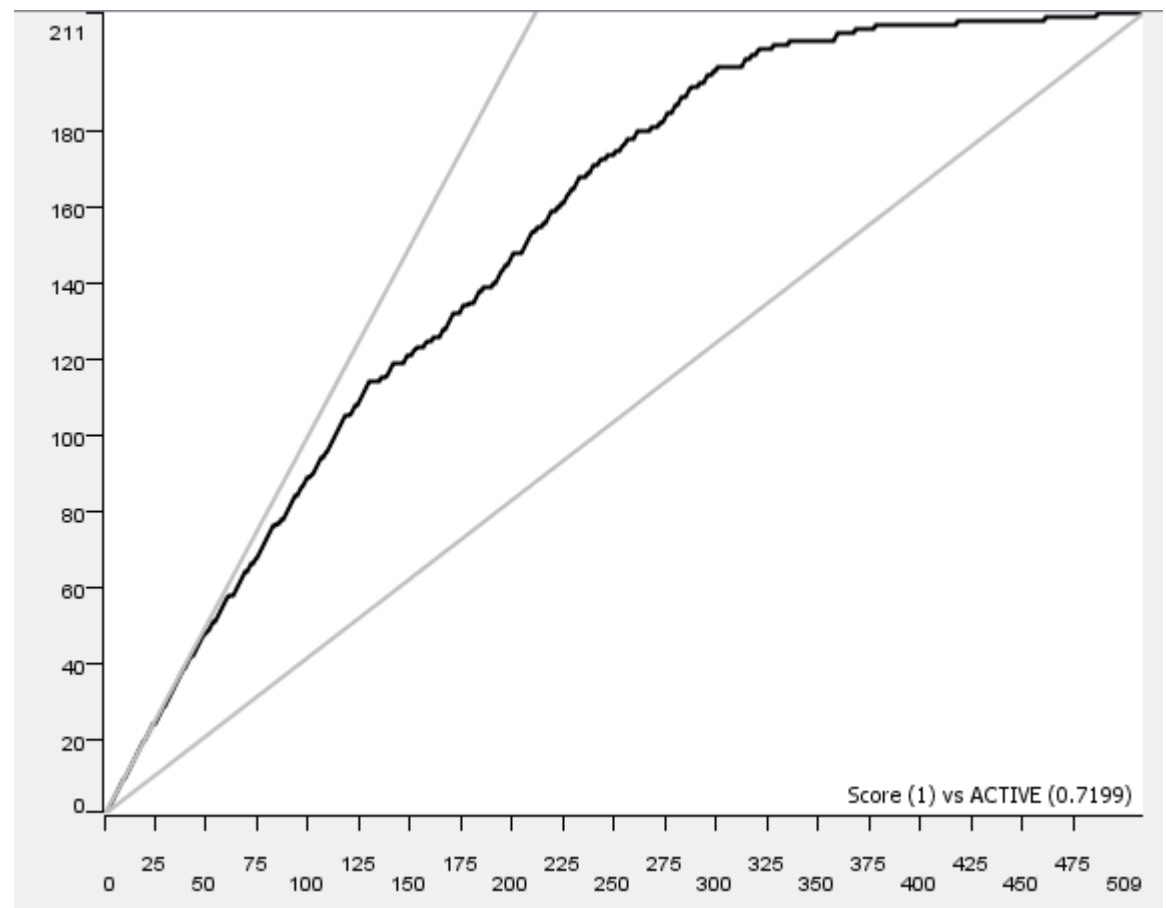

N=509

|                   |         |
|-------------------|---------|
| Top 10% Mean IC50 | 1.66 nM |
|-------------------|---------|

|          | Predicted Active | Predicted Inactive |
|----------|------------------|--------------------|
| Active   | 187              | 24                 |
| Inactive | 93               | 205                |

# <20 nM DefGood in HIV Protease

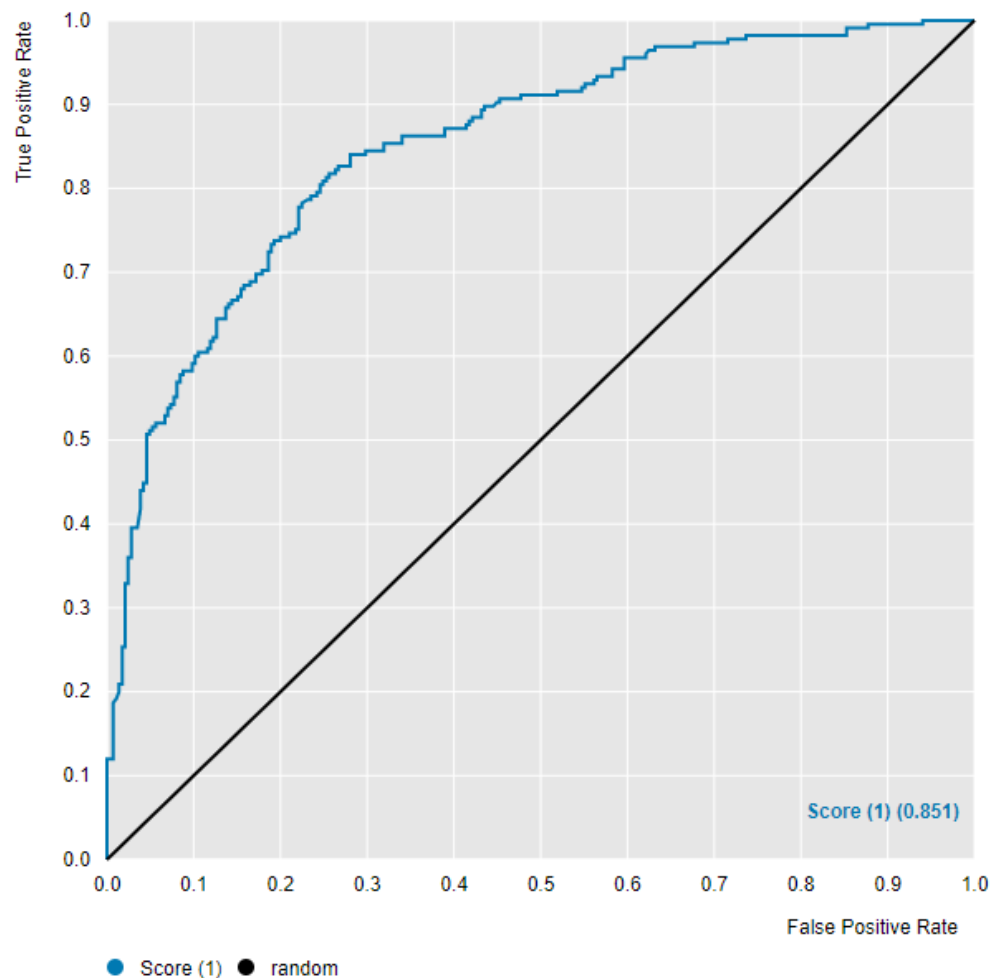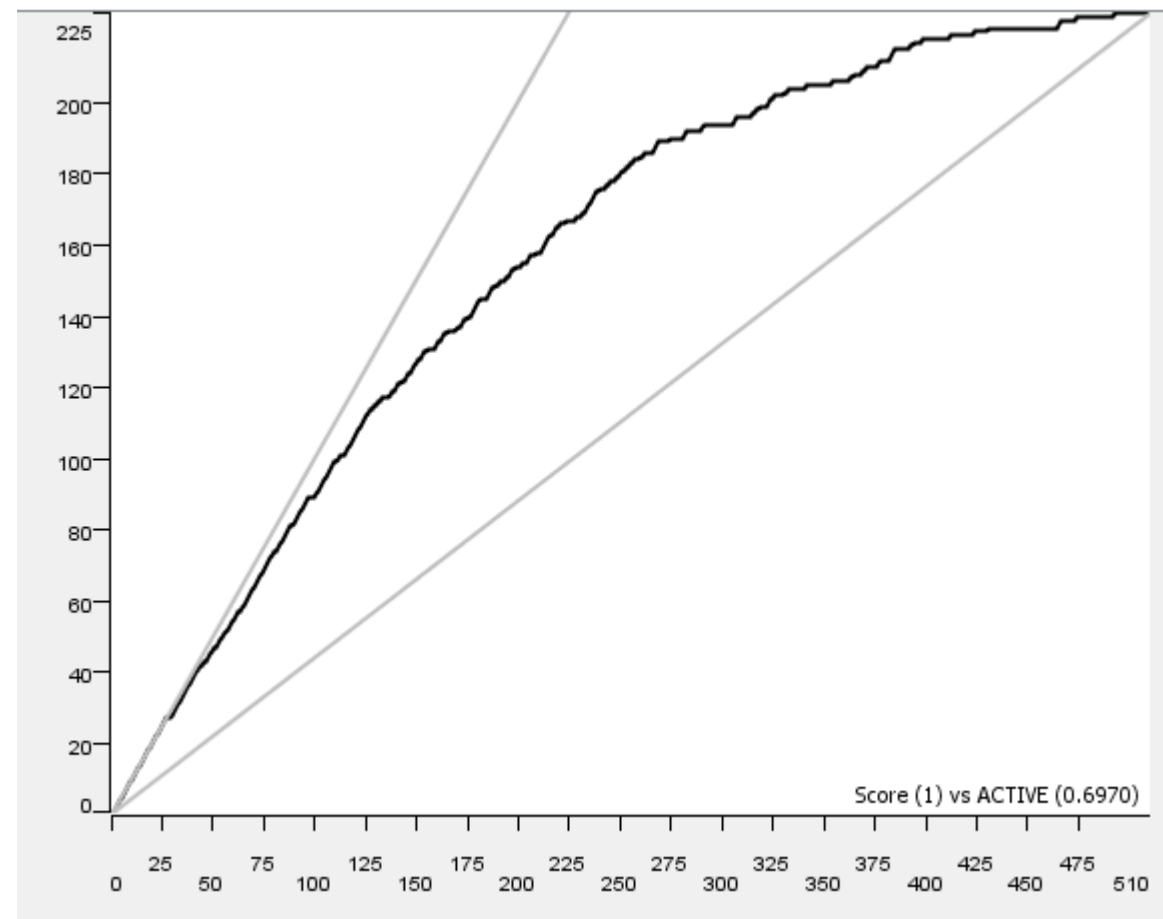

N=510

Top 10% Mean  
IC50

15.0 nM

|          | Predicted Active | Predicted Inactive |
|----------|------------------|--------------------|
| Active   | 181              | 44                 |
| Inactive | 70               | 215                |

# <25 nM DefGood in HIV Protease

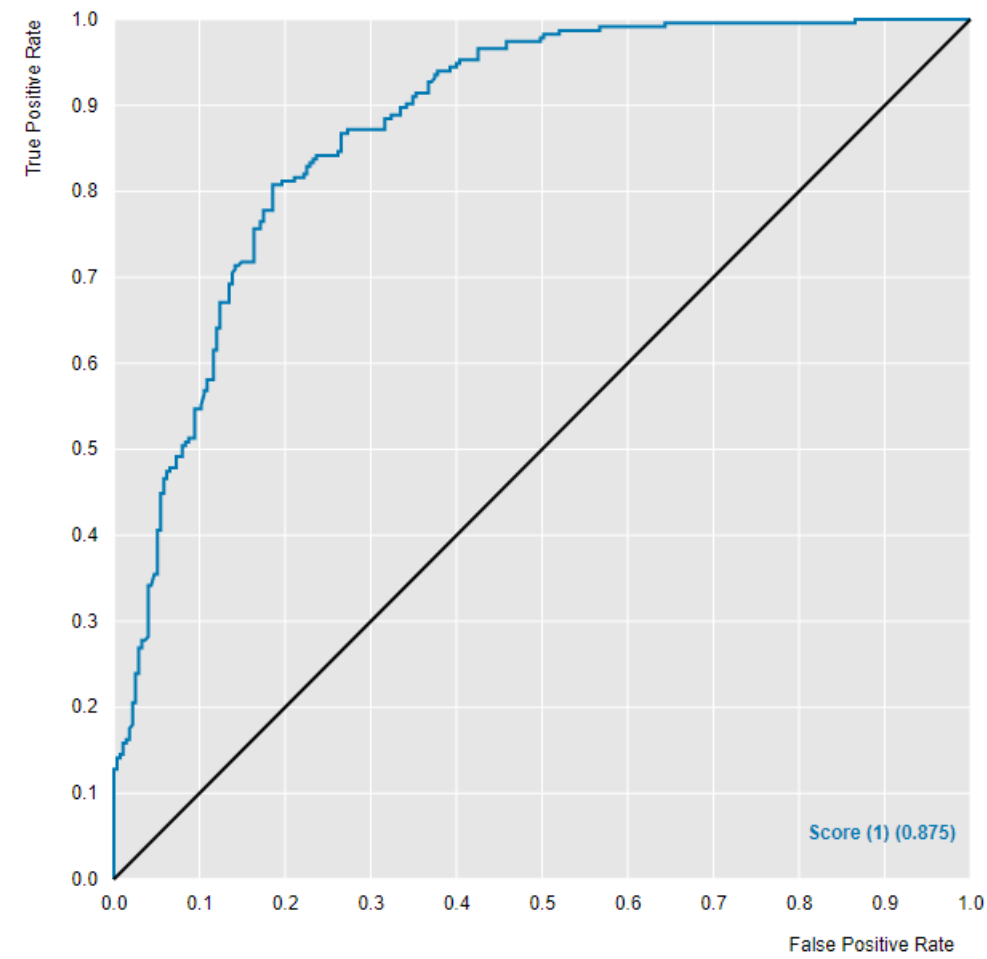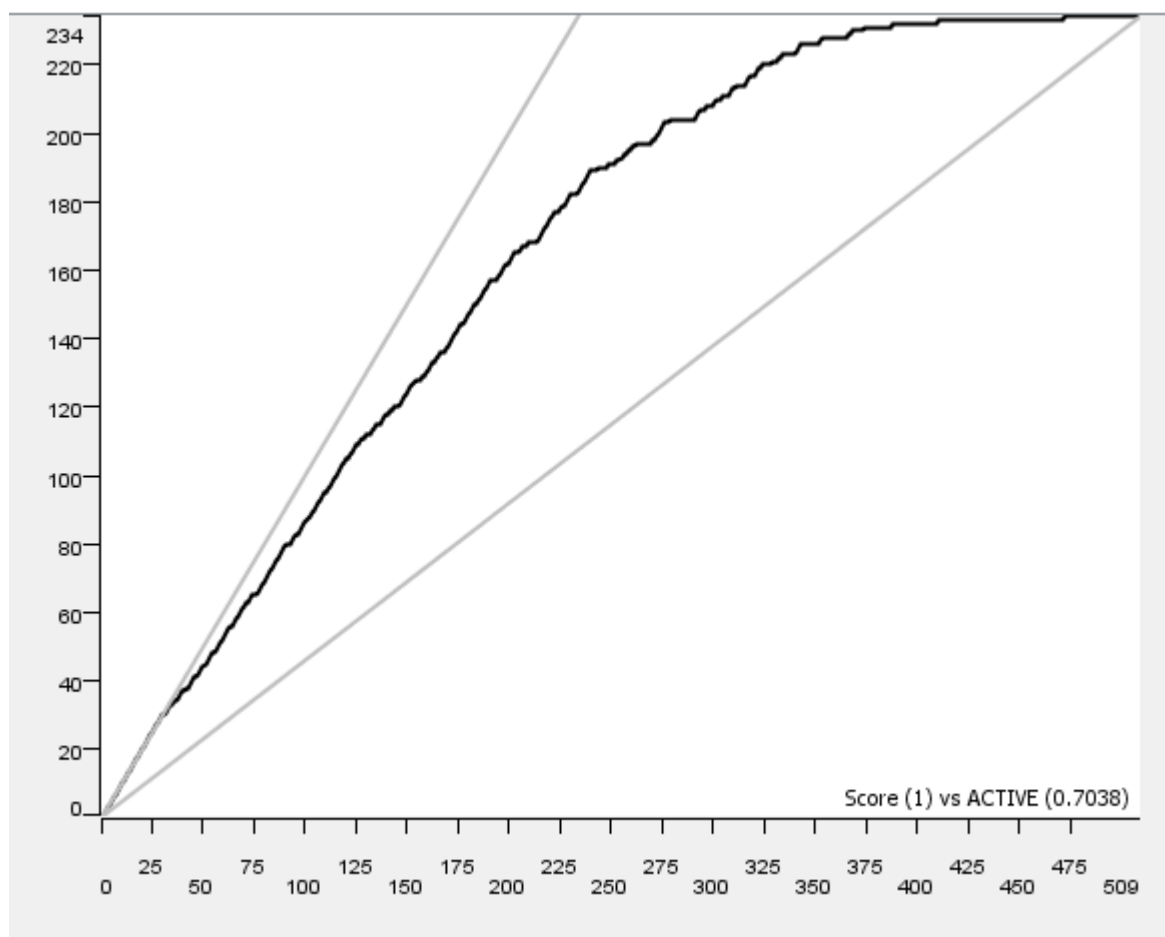

N=509

● Score (1) ● random

|                      |         |
|----------------------|---------|
| Top 10% Mean<br>IC50 | 11.8 nM |
|----------------------|---------|

|          | Predicted Active | Predicted Inactive |
|----------|------------------|--------------------|
| Active   | 204              | 30                 |
| Inactive | 75               | 200                |

# Decision on DefGood

- <15 nM has the best performance with regard to enrichment and mean top 10% IC50.



# RF - <15 nM DefGood in HIV Protease

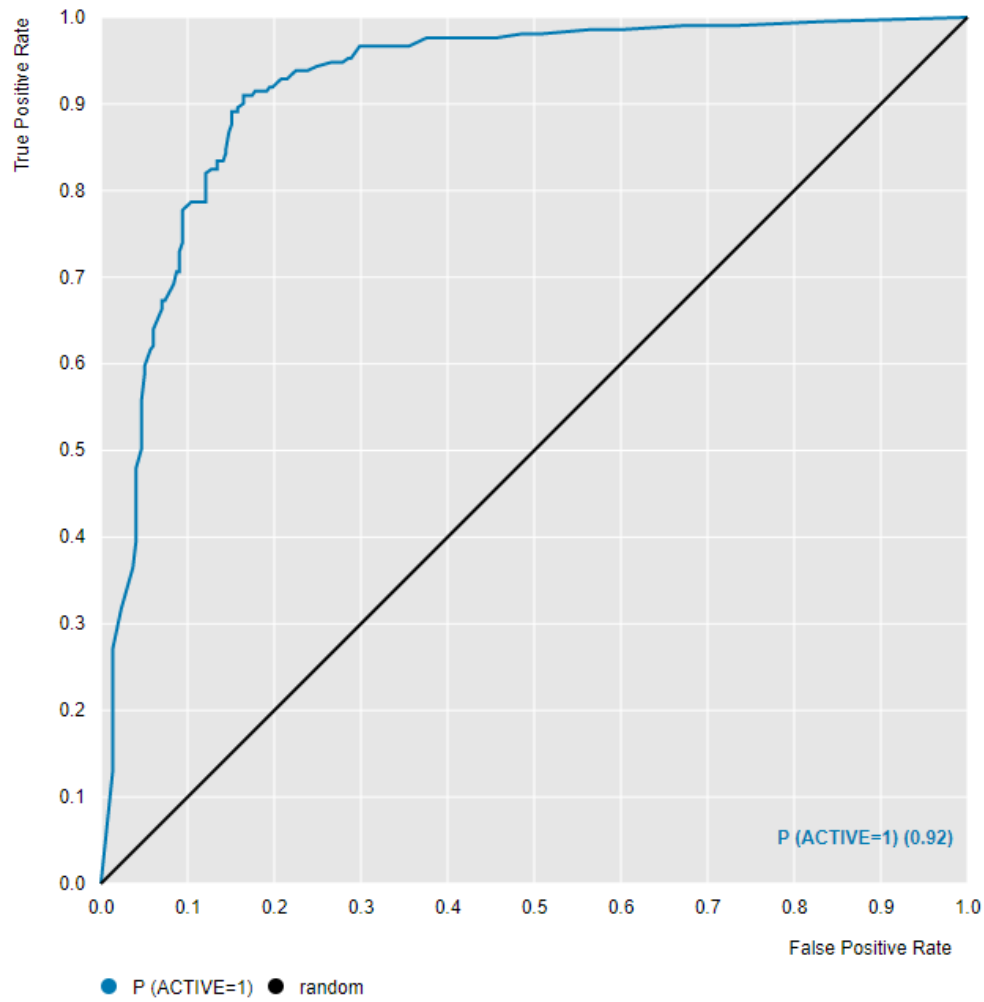

N=509

| Top 10% Mean IC50 | 18.7 nM |
|-------------------|---------|
|-------------------|---------|

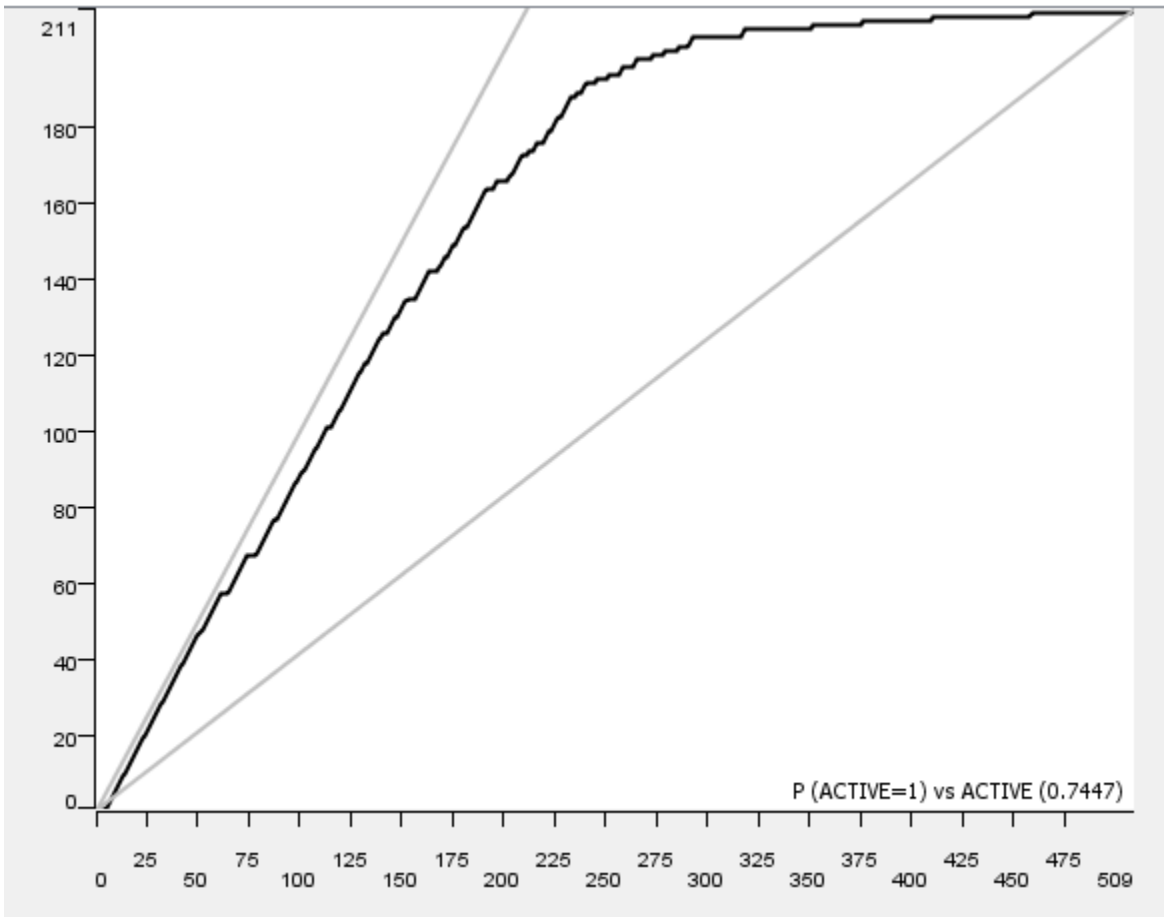

|          | Predicted Active | Predicted Inactive |
|----------|------------------|--------------------|
| Active   | 179              | 32                 |
| Inactive | 43               | 255                |

# Decision on DefGood - RF

- Work in ALK showed DefGood in the NBN was similar to DefGood in an RF. Therefore, this value for DefGood from the NBN design was used as DefGood.

# PNN - <15 nM DefGood in HIV Protease

- Properties List (46 calculatable properties were used)
- Parameterization (Global Accuracy for Activity at a 15 nM decision value was used, and a 5-fold stratified sampling cross validation was used to parameterize theta minus and theta plus) Theta Minus = 0.05 and Theta Plus = 0.35

# PNN - <15 nM DefGood in HIV Protease

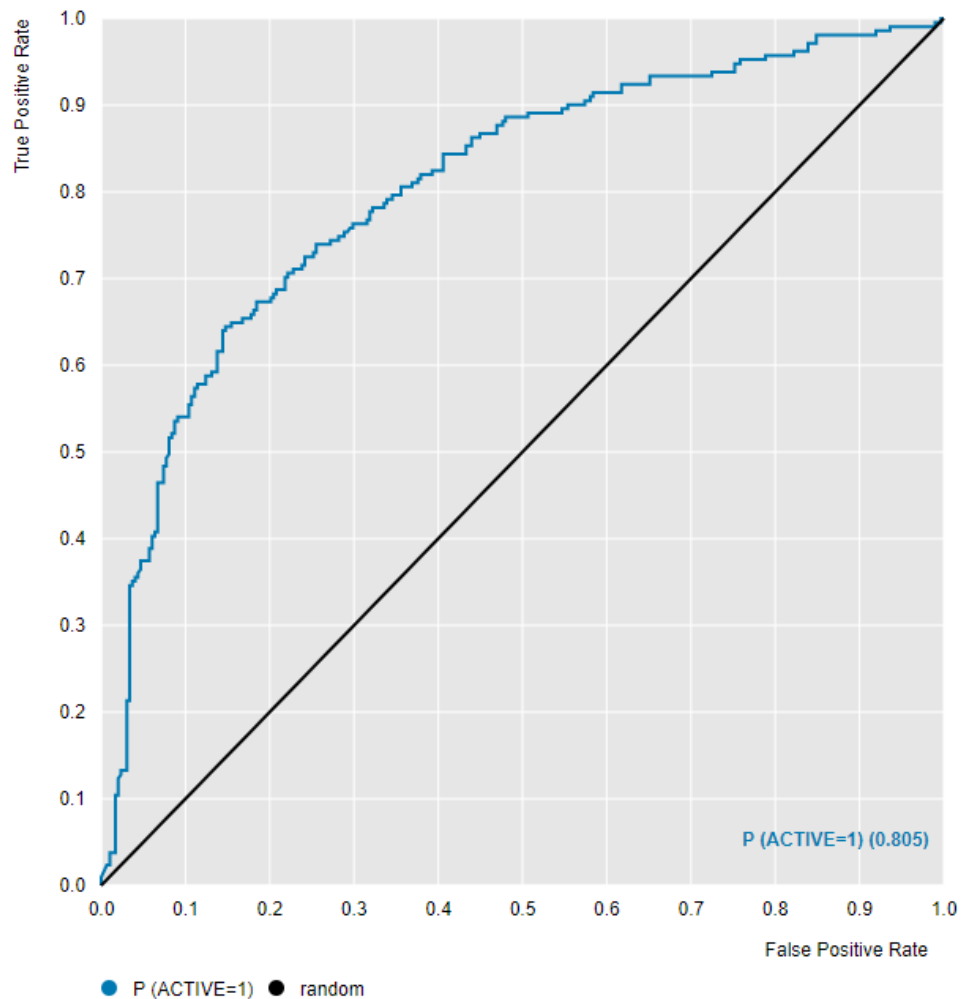

N=509

Top 10% Mean  
IC50

117 nM  
Several  
significant  
mistakes

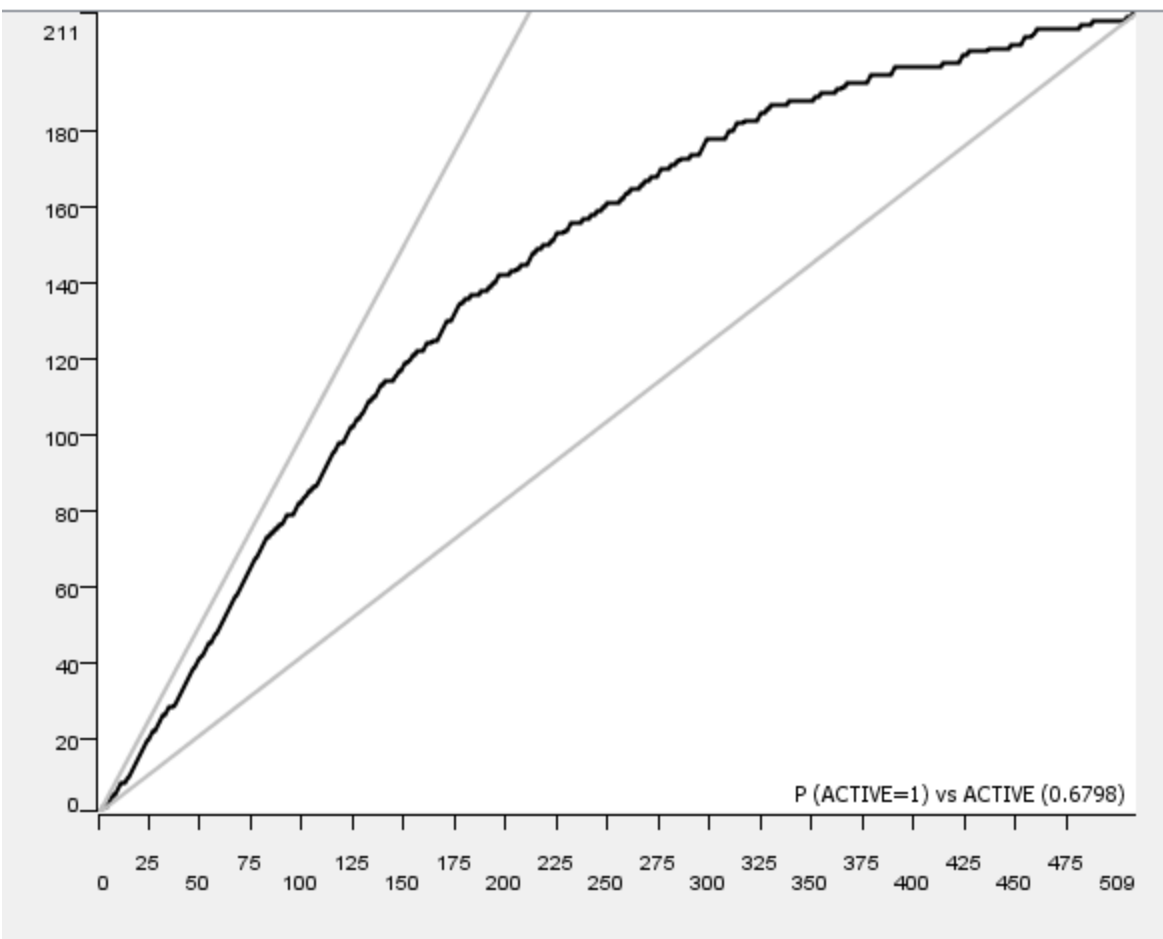

|          | Predicted Active | Predicted Inactive |
|----------|------------------|--------------------|
| Active   | 126              | 85                 |
| Inactive | 41               | 257                |

# NBN Error Tolerance- <15 nM DefGood in HIV Protease

- 0-50% absolute error

<15 nM DefGood in HIV Protease, 10% error;  
Random seed = 1515533876005

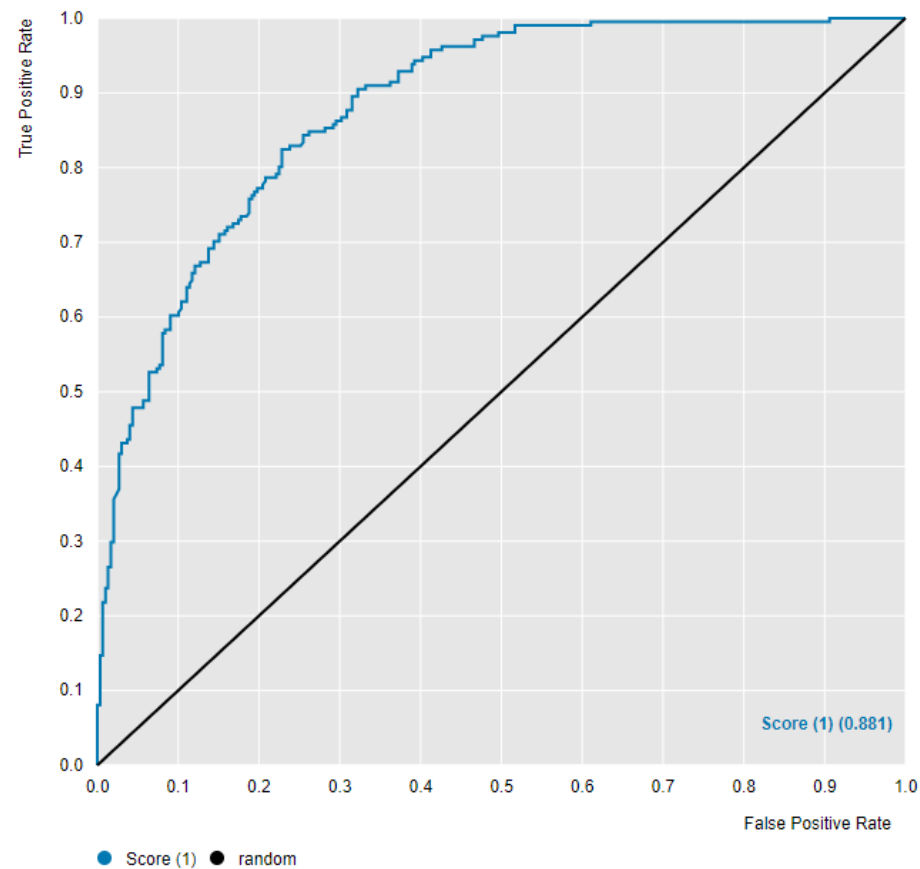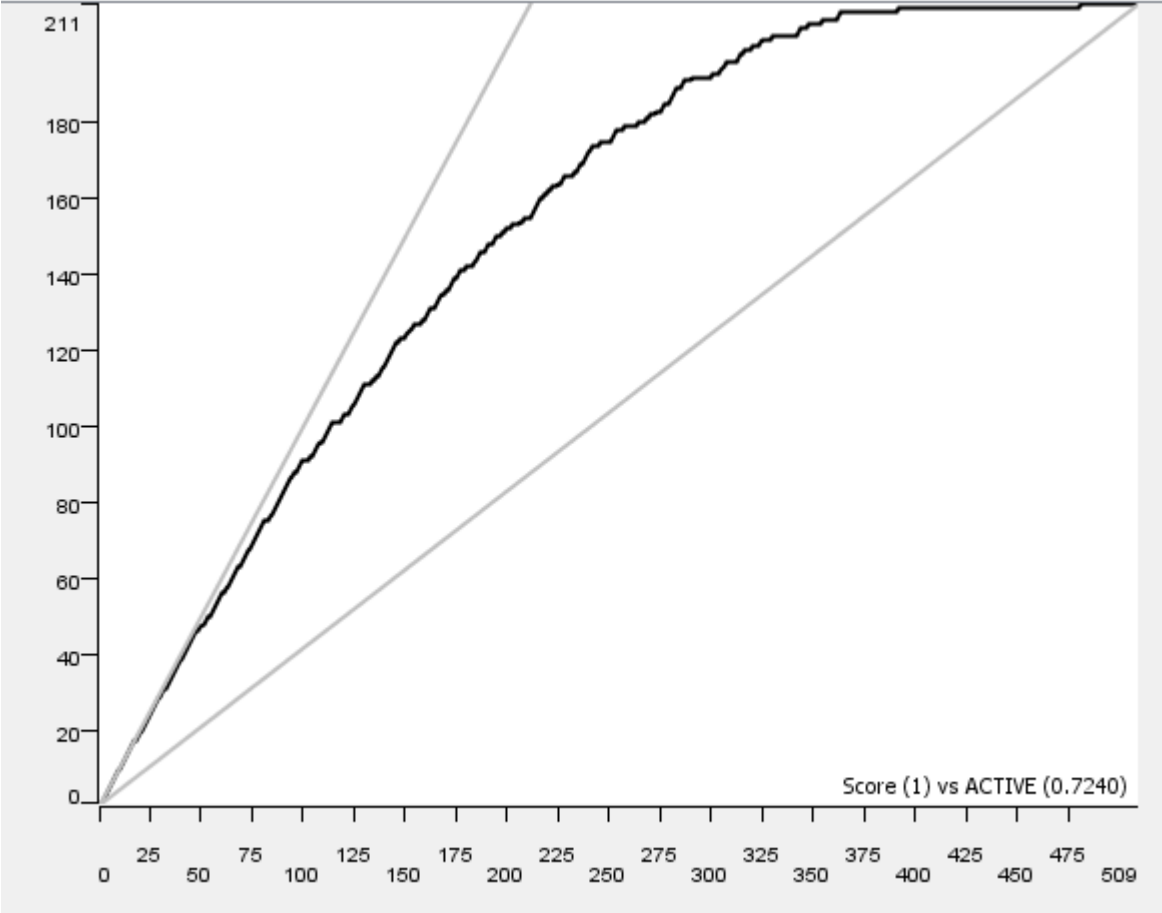

N=509

|                   |         |
|-------------------|---------|
| Top 10% Mean IC50 | 1.83 nM |
|-------------------|---------|

|          | Predicted Active | Predicted Inactive |
|----------|------------------|--------------------|
| Active   | 174              | 37                 |
| Inactive | 69               | 229                |

# <15 nM DefGood in HIV Protease, 20% error;

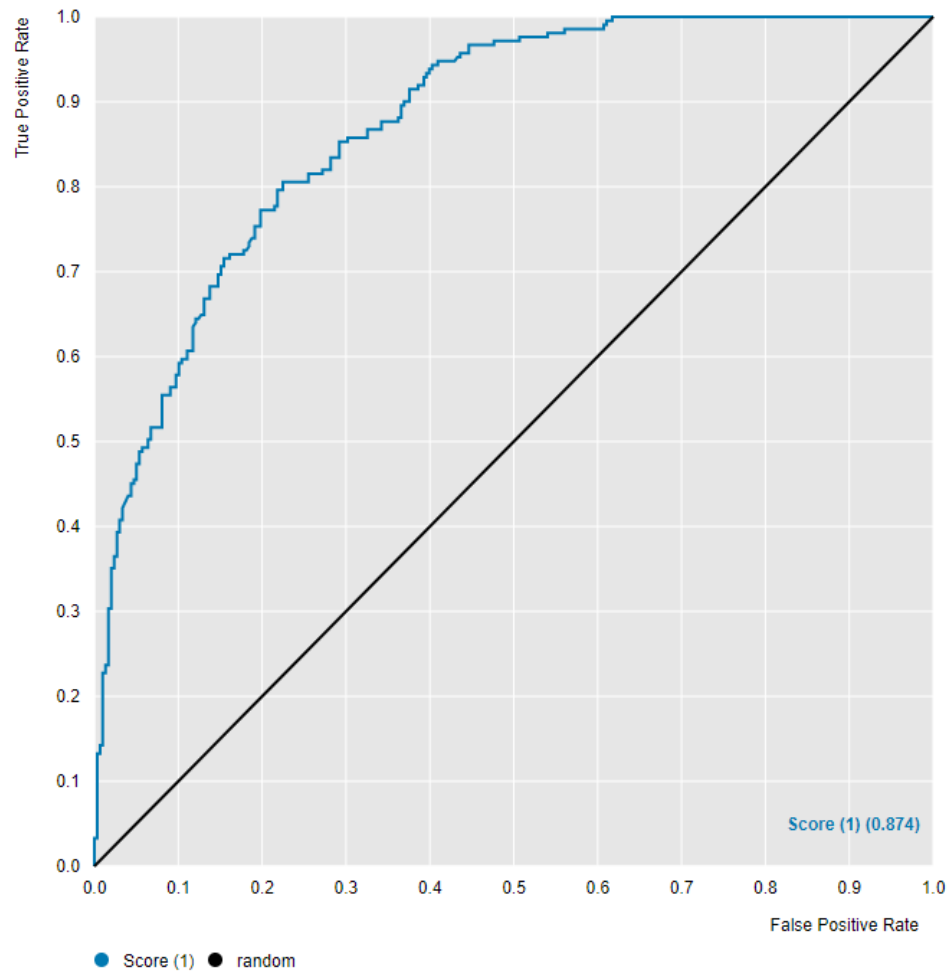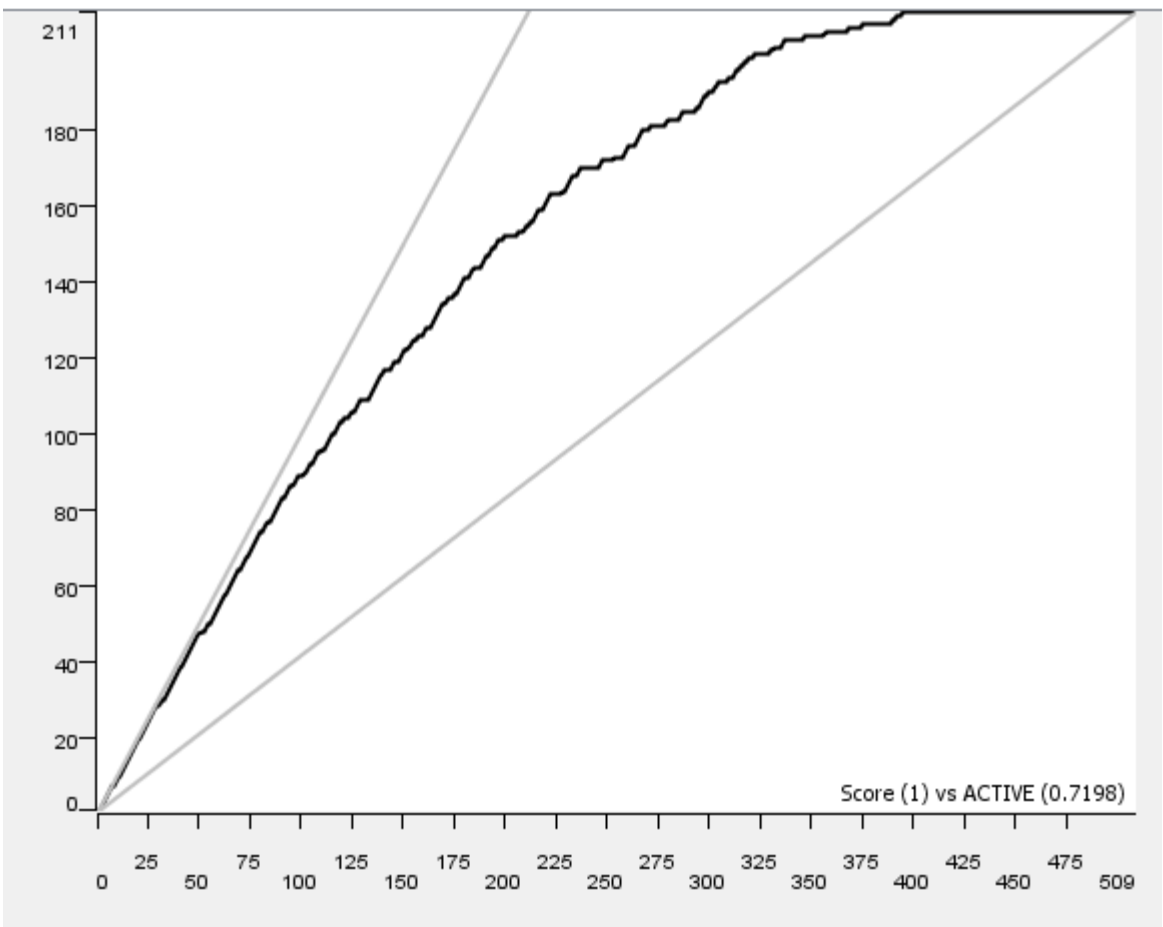

N=509

|                   |         |
|-------------------|---------|
| Top 10% Mean IC50 | 2.26 nM |
|-------------------|---------|

|          | Predicted Active | Predicted Inactive |
|----------|------------------|--------------------|
| Active   | 177              | 34                 |
| Inactive | 87               | 211                |

# <15 nM DefGood in HIV Protease, 30% error;

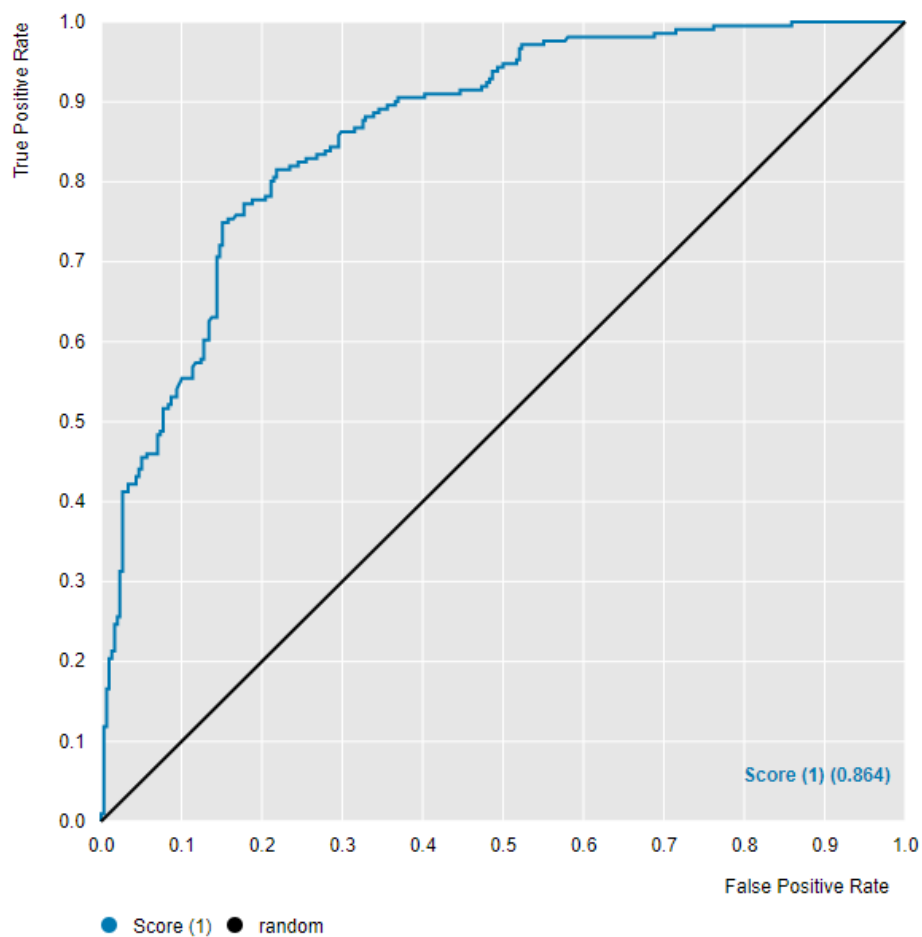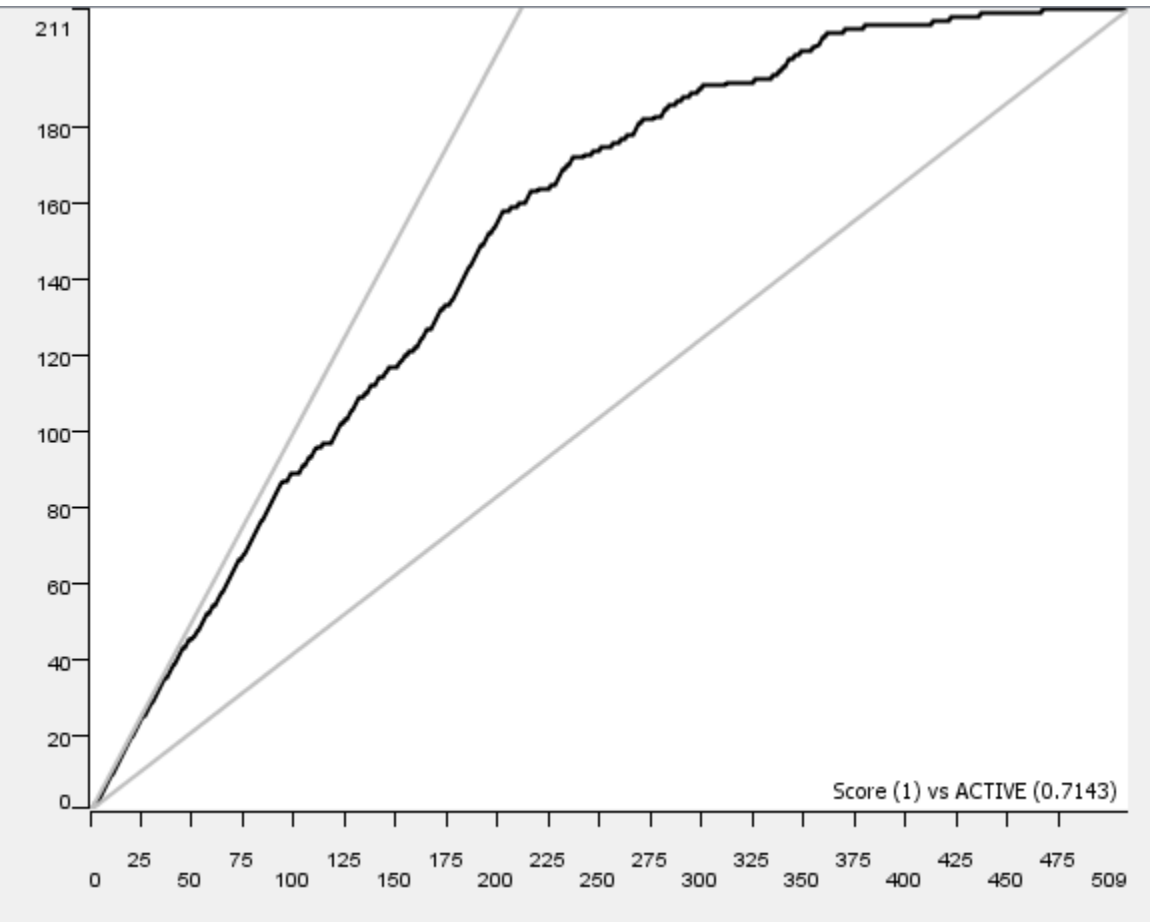

N=509

|                   |         |
|-------------------|---------|
| Top 10% Mean IC50 | 7.90 nM |
|-------------------|---------|

|          | Predicted Active | Predicted Inactive |
|----------|------------------|--------------------|
| Active   | 175              | 36                 |
| Inactive | 78               | 220                |



# <15 nM DefGood in HIV Protease, 40% error;

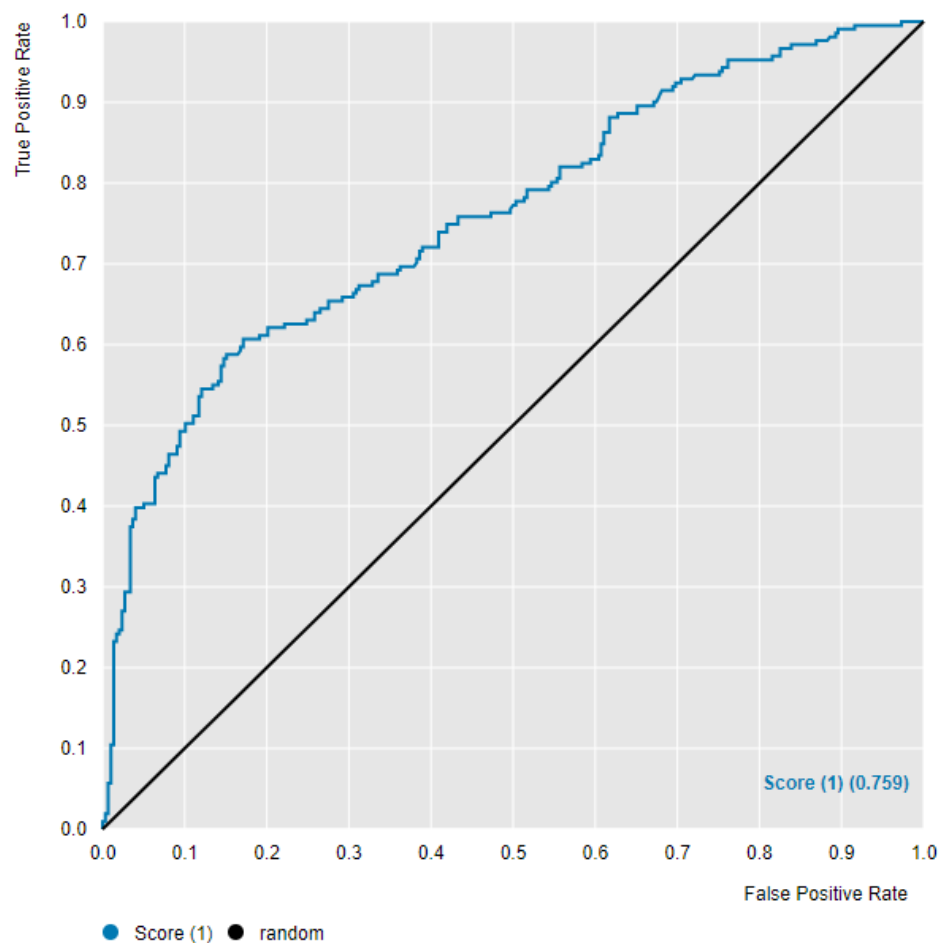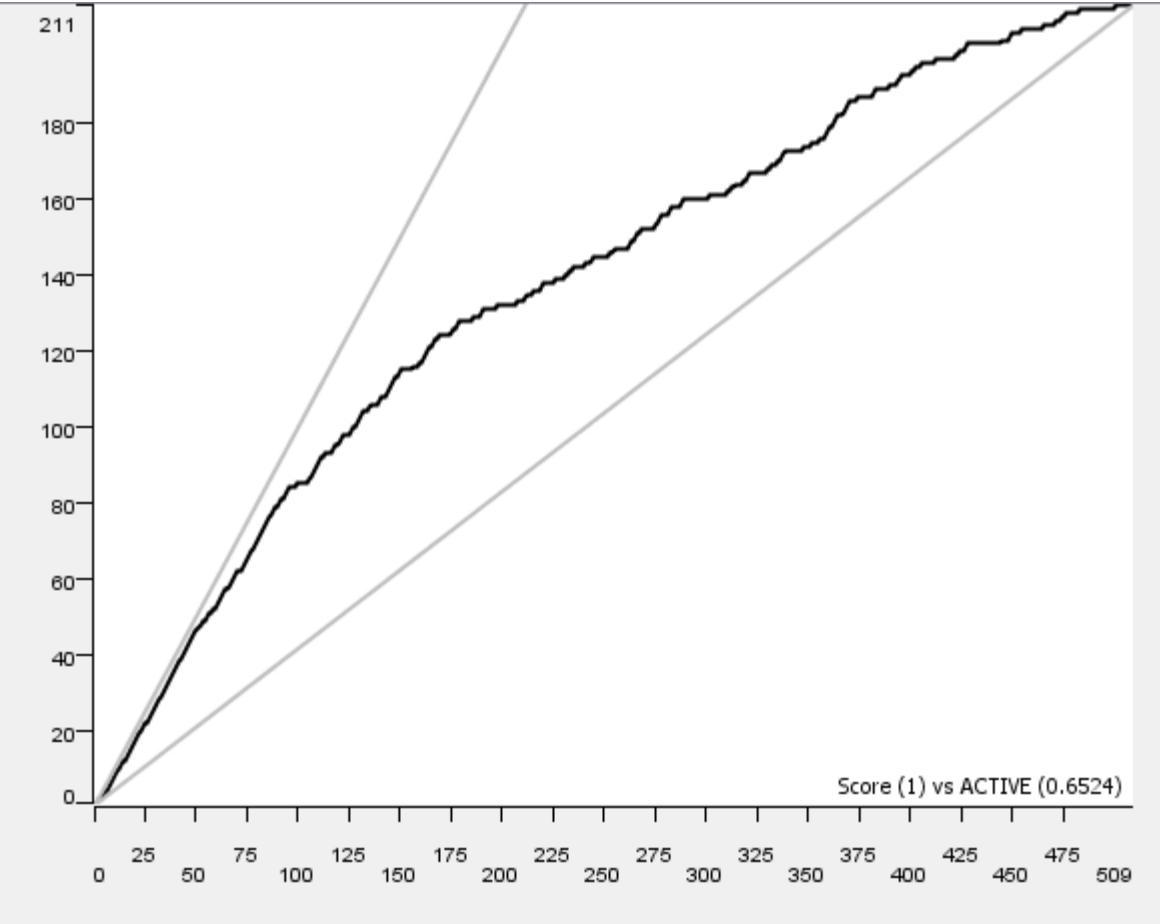

N=509

|                   |        |
|-------------------|--------|
| Top 10% Mean IC50 | 4.6 nM |
|-------------------|--------|

|          | Predicted Active | Predicted Inactive |
|----------|------------------|--------------------|
| Active   | 116              | 95                 |
| Inactive | 42               | 256                |

# <15 nM DefGood in HIV Protease, 45% error;

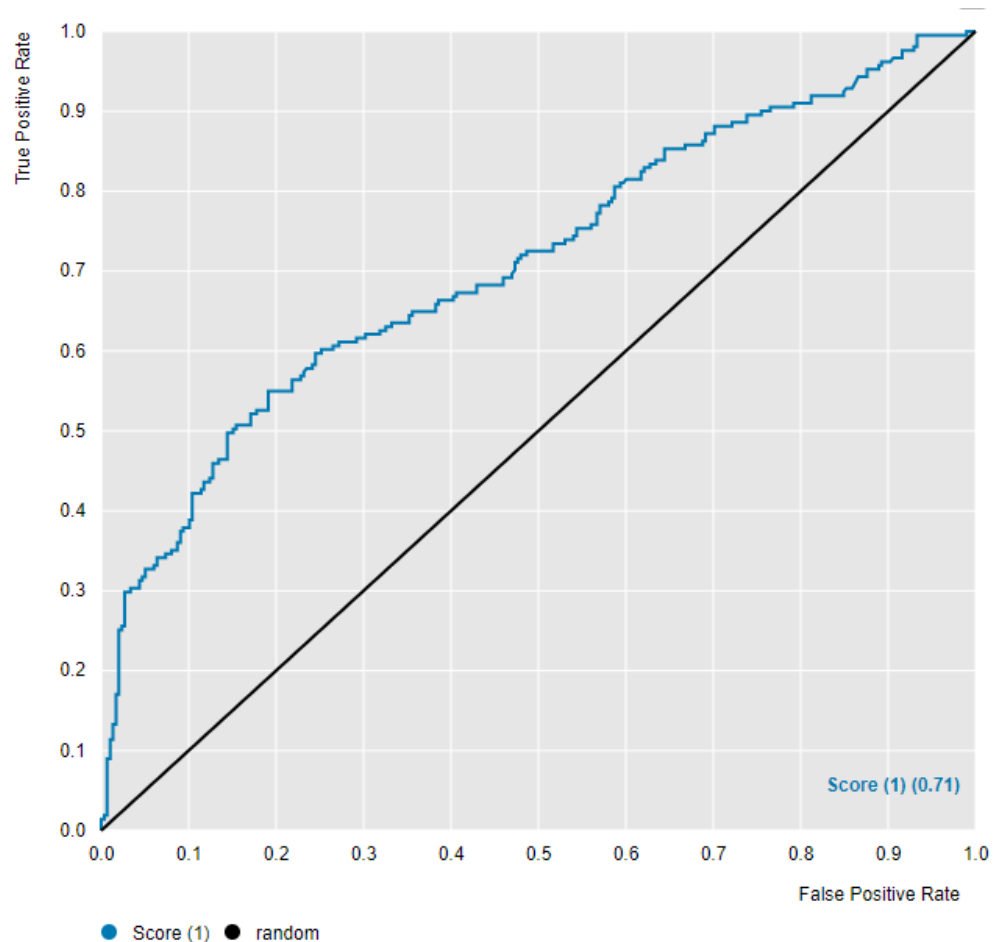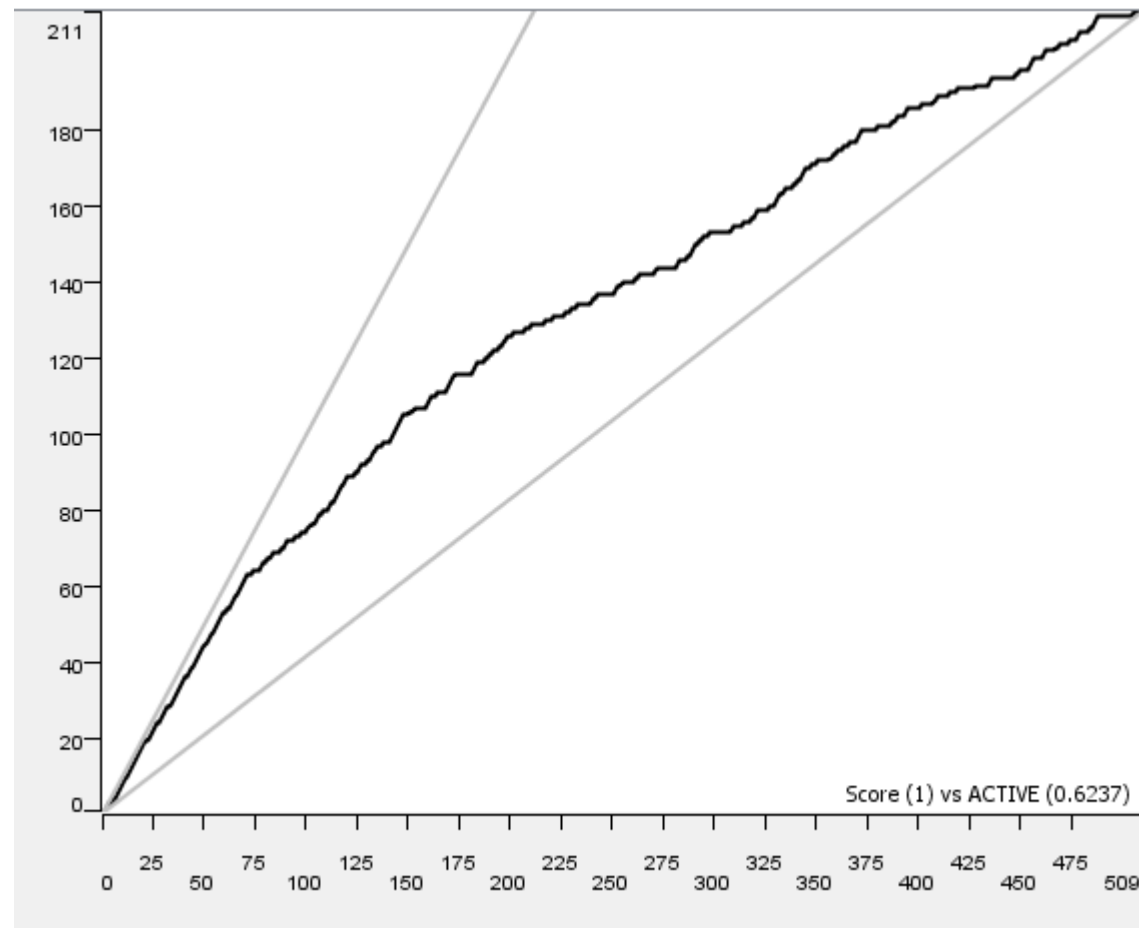

N=509

Top 10% Mean  
IC50

5.8 nM

|          | Predicted Active | Predicted Inactive |
|----------|------------------|--------------------|
| Active   | 123              | 88                 |
| Inactive | 72               | 226                |

# <15 nM DefGood in HIV Protease, 50% error;

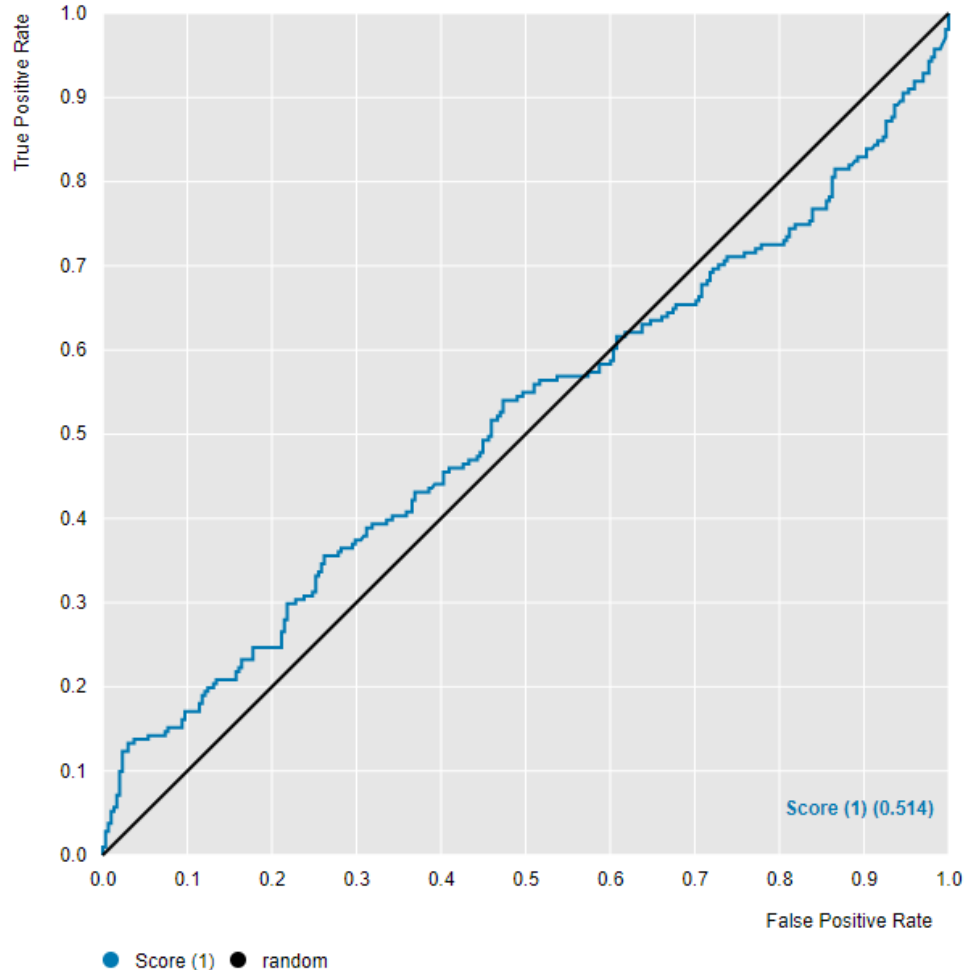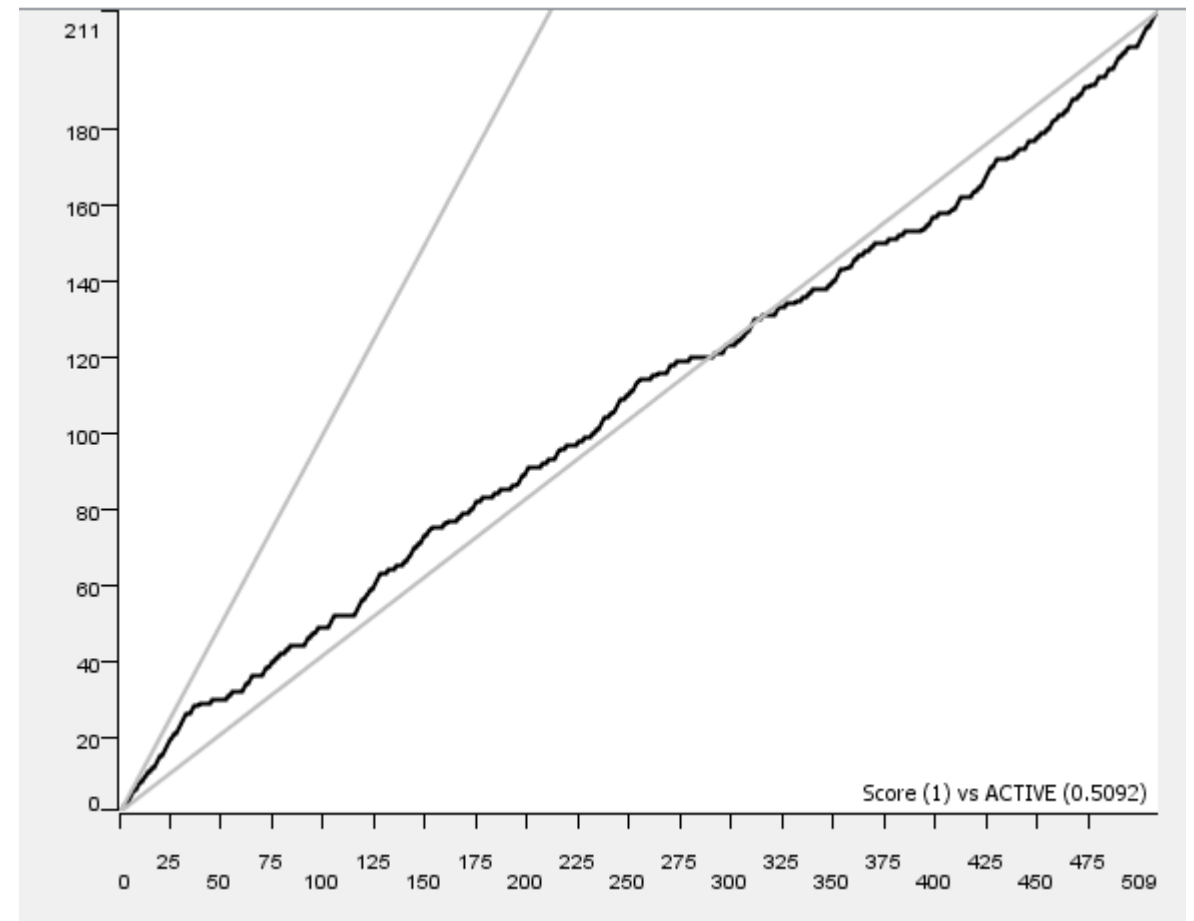

N=509

| Top 10% Mean IC50 | 8,500 nM |
|-------------------|----------|
|-------------------|----------|

|          | Predicted Active | Predicted Inactive |
|----------|------------------|--------------------|
| Active   | 39               | 172                |
| Inactive | 35               | 263                |

<15nM DefGood in HIV Protease, 10% error;  
Random seed = 429

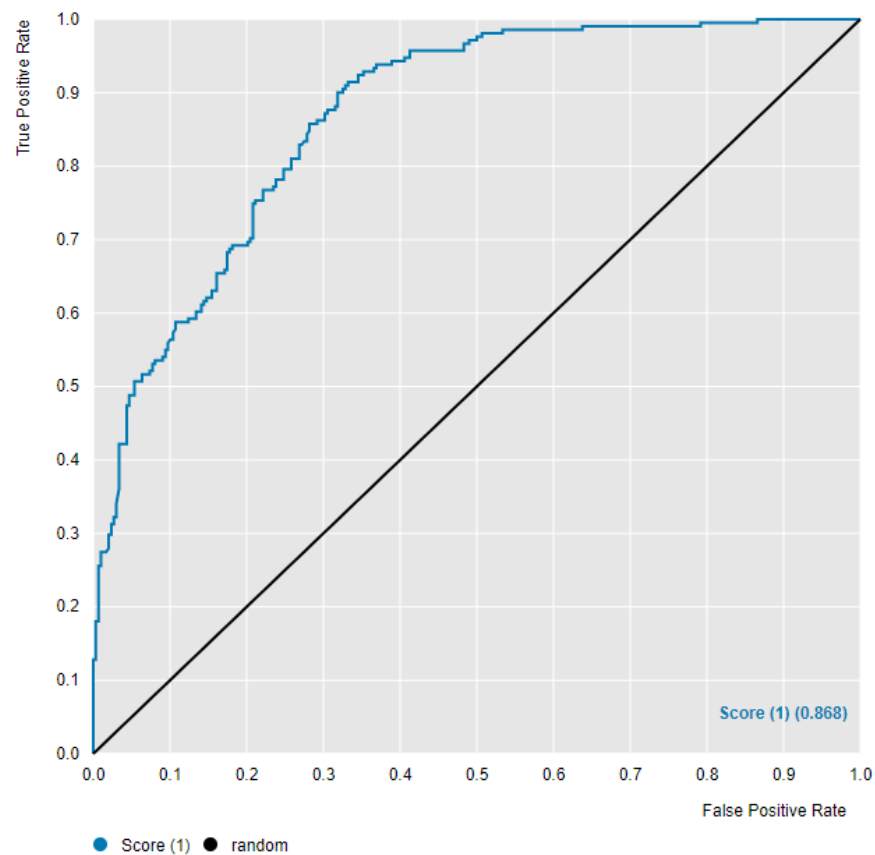

N=509

Top 10% Mean  
IC50

1.58 nM

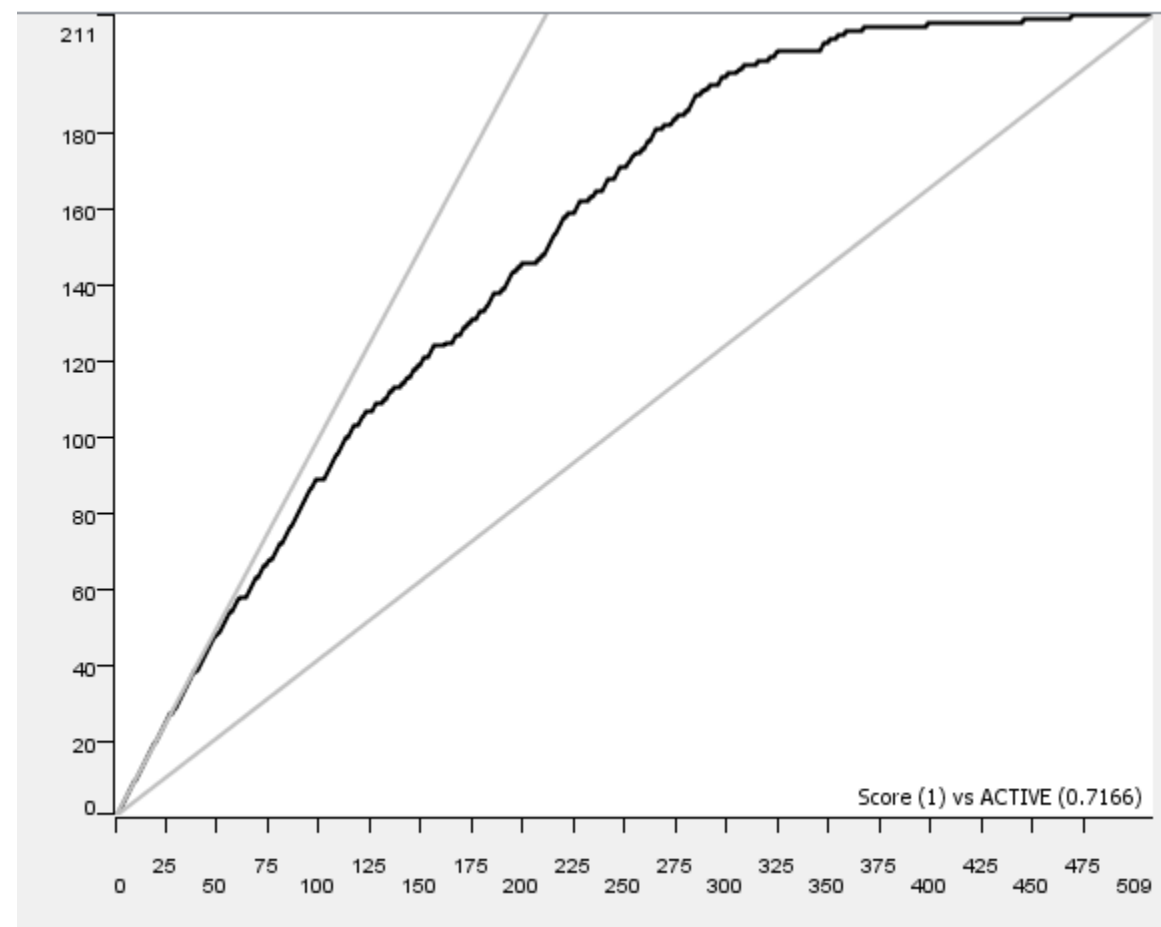

|          | Predicted Active | Predicted Inactive |
|----------|------------------|--------------------|
| Active   | 171              | 40                 |
| Inactive | 80               | 218                |

<15nM DefGood in HIV Protease, 20% error;  
Random seed = 429

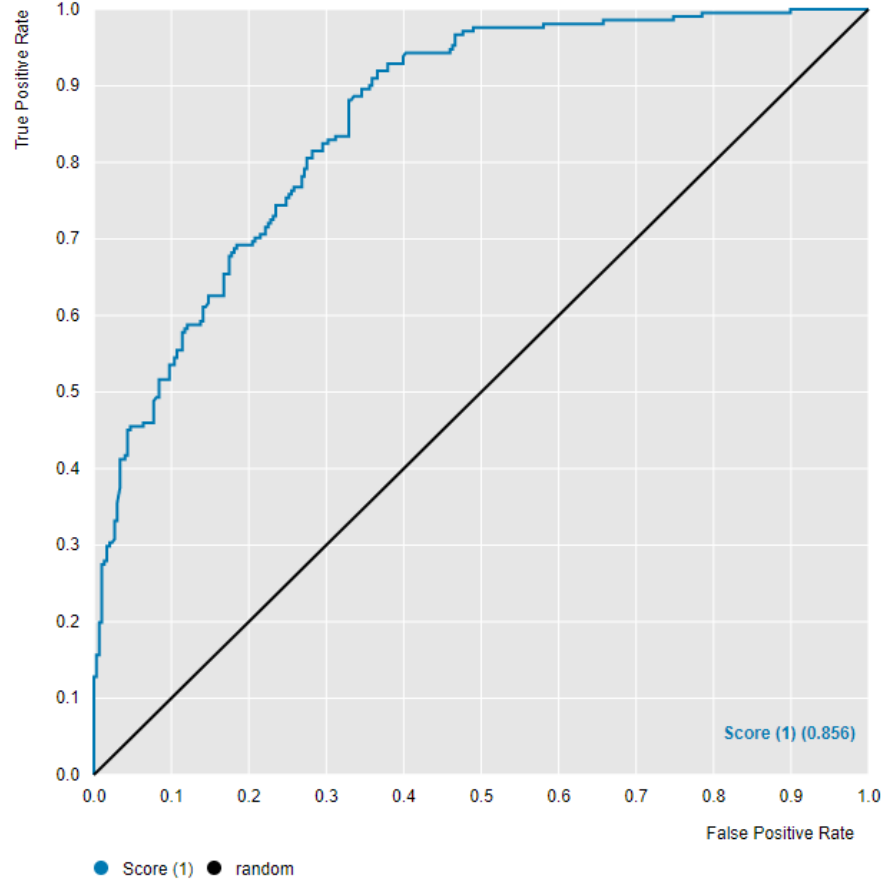

N=509

| Top 10% Mean<br>IC50 | 2.65 nM |
|----------------------|---------|
|----------------------|---------|

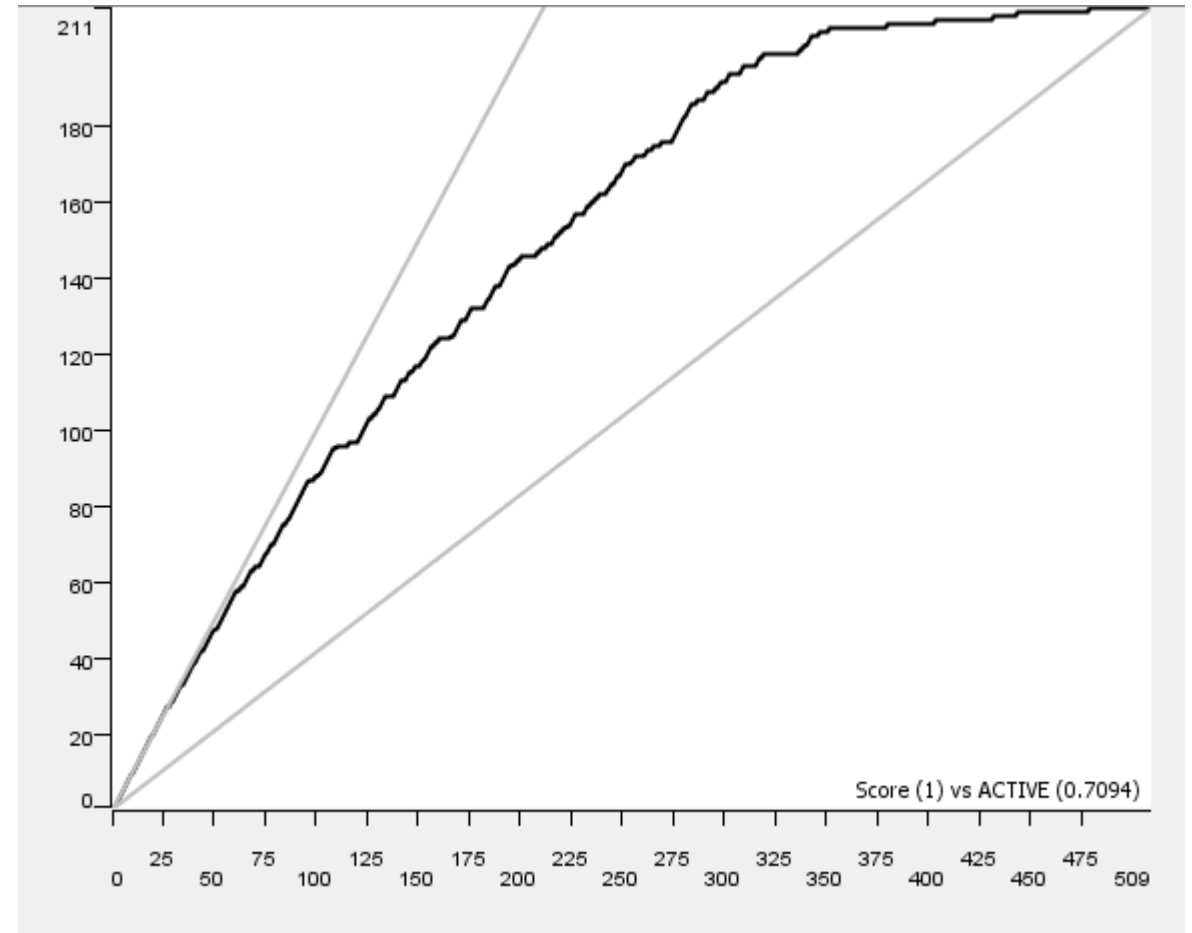

|          | Predicted Active | Predicted Inactive |
|----------|------------------|--------------------|
| Active   | 175              | 36                 |
| Inactive | 92               | 206                |

<15nM DefGood in HIV Protease, 30% error;  
Random seed = 429

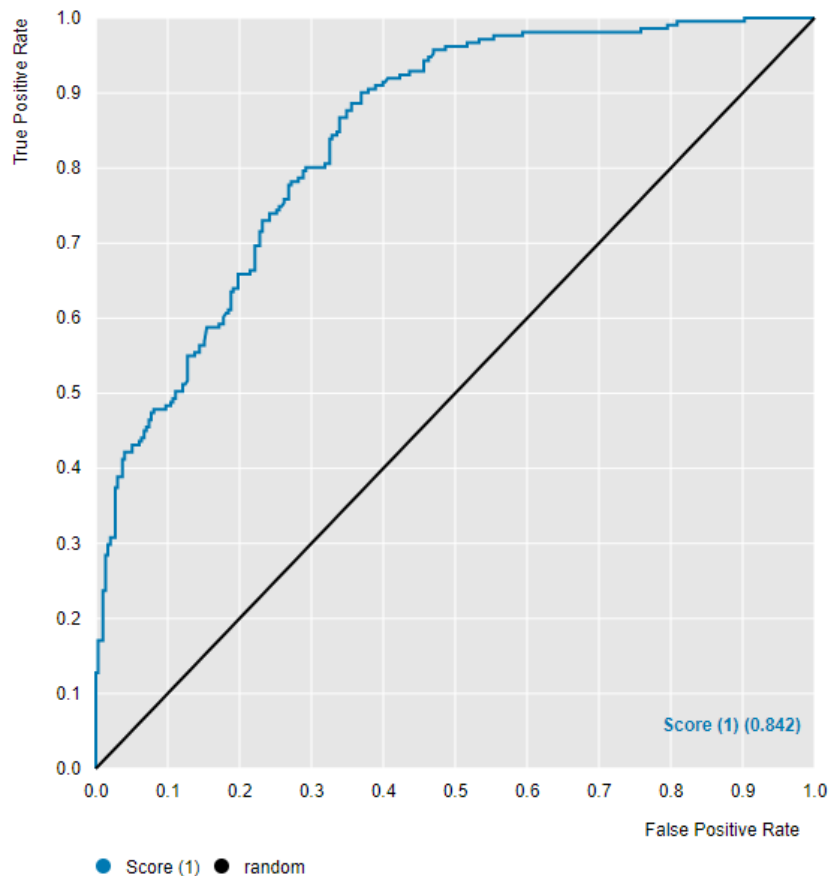

N=509

Top 10% Mean  
IC50

3.13 nM

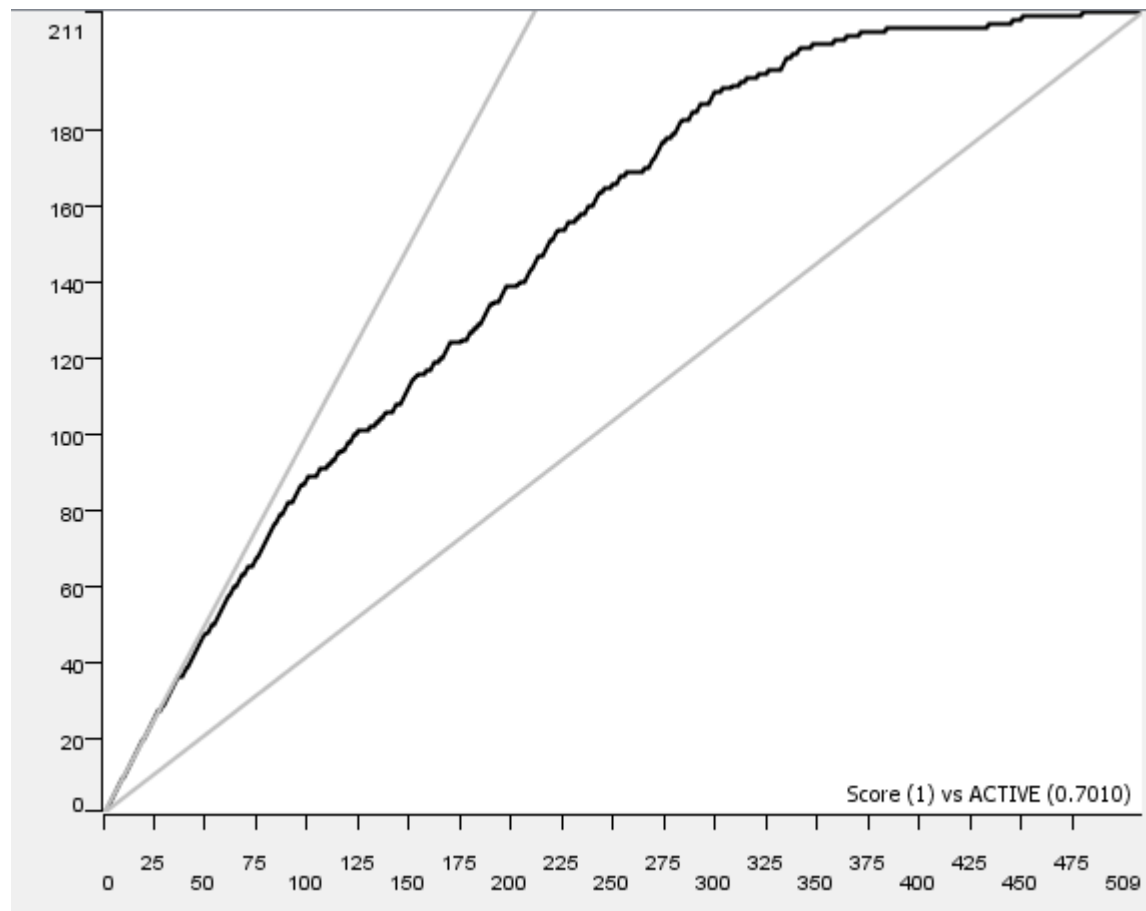

|          | Predicted Active | Predicted Inactive |
|----------|------------------|--------------------|
| Active   | 187              | 24                 |
| Inactive | 110              | 188                |

<15nM DefGood in HIV Protease, 40% error;  
Random seed = 429

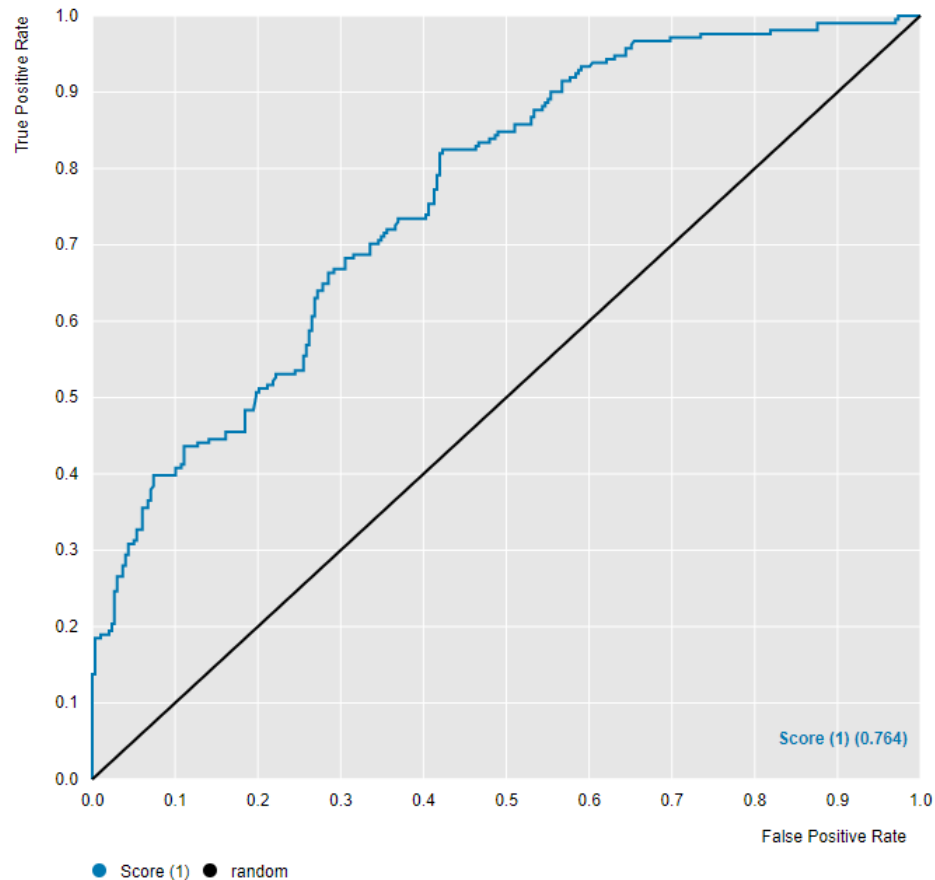

N=509

Top 10% Mean  
IC50

10.6 nM

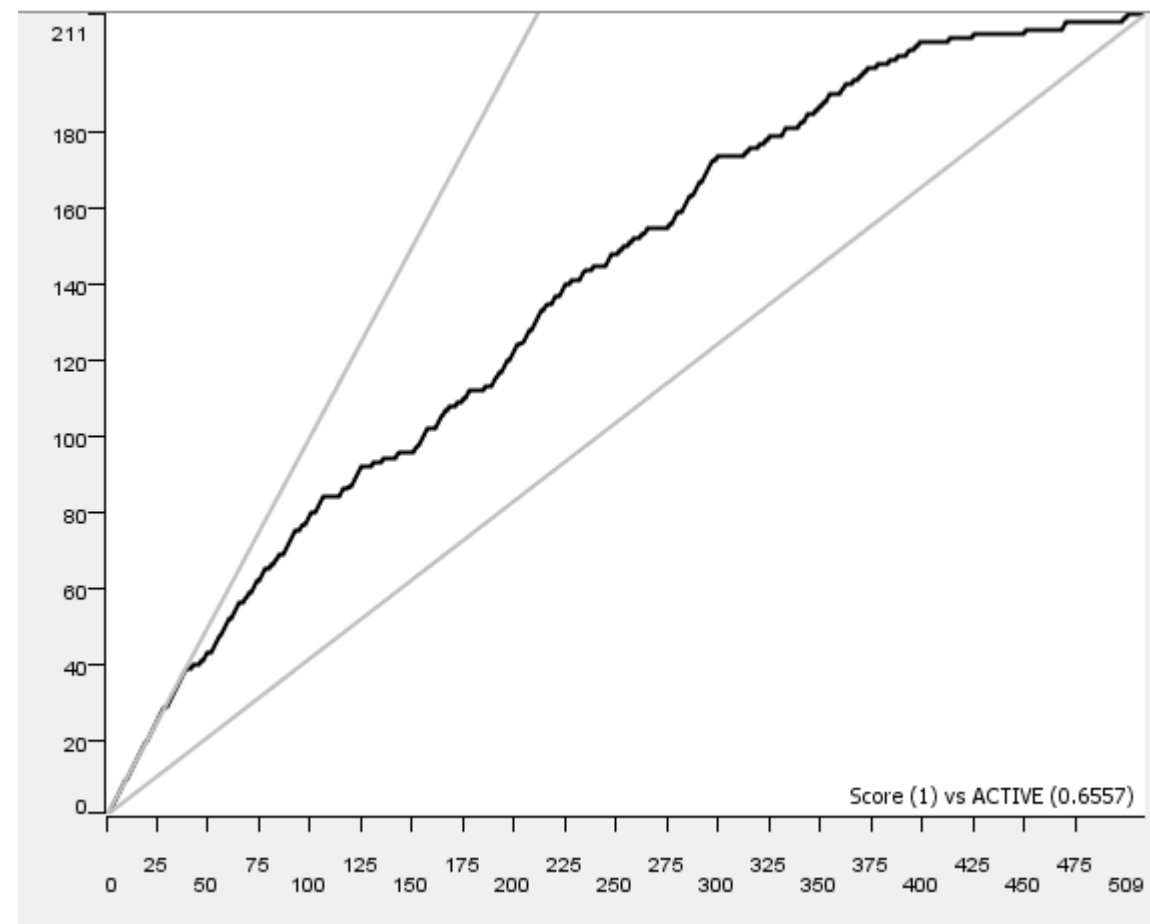

|          | Predicted Active | Predicted Inactive |
|----------|------------------|--------------------|
| Active   | 196              | 15                 |
| Inactive | 176              | 22                 |

<15nM DefGood in HIV Protease, 45% error;  
Random seed = 429

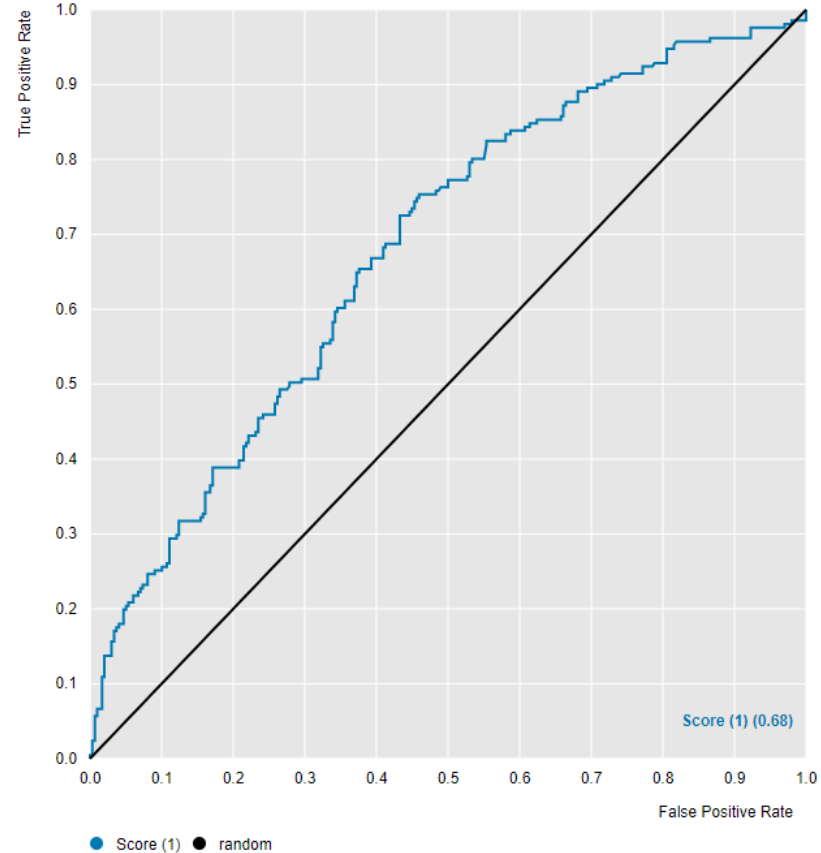

N=509

| Top 10% Mean<br>IC50 | 893 nM |
|----------------------|--------|
|----------------------|--------|

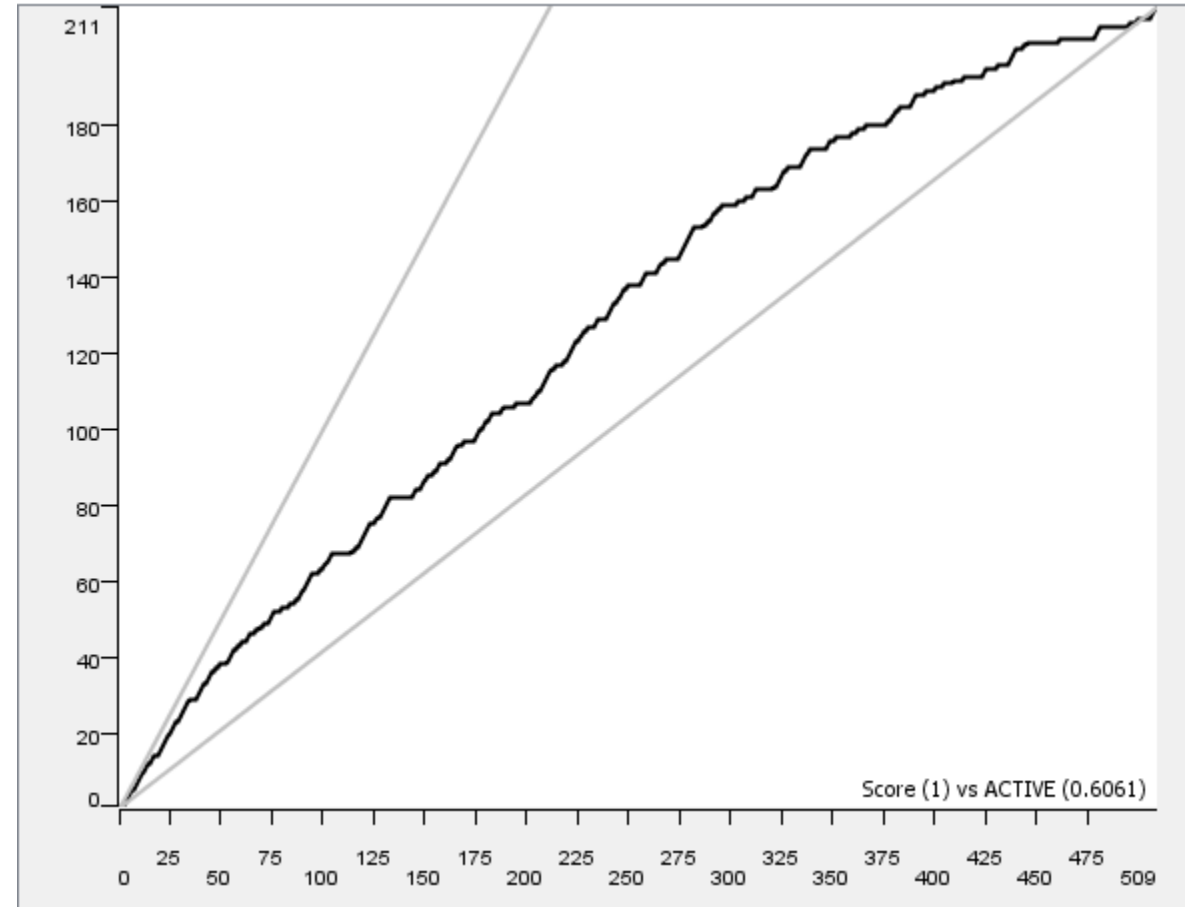

|          | Predicted Active | Predicted Inactive |
|----------|------------------|--------------------|
| Active   | 189              | 22                 |
| Inactive | 210              | 88                 |



<15nM DefGood in HIV Protease, 10% error;  
Random seed = 121783

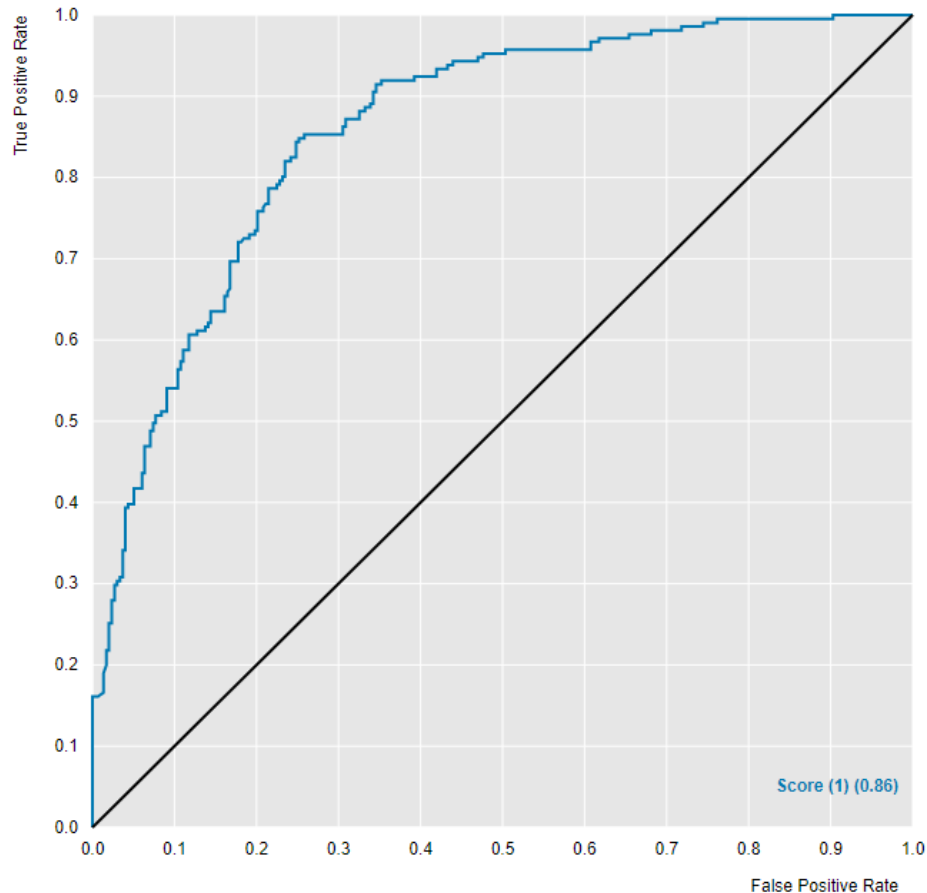

N=509

|                      |         |
|----------------------|---------|
| Top 10% Mean<br>IC50 | 10.6 nM |
|----------------------|---------|

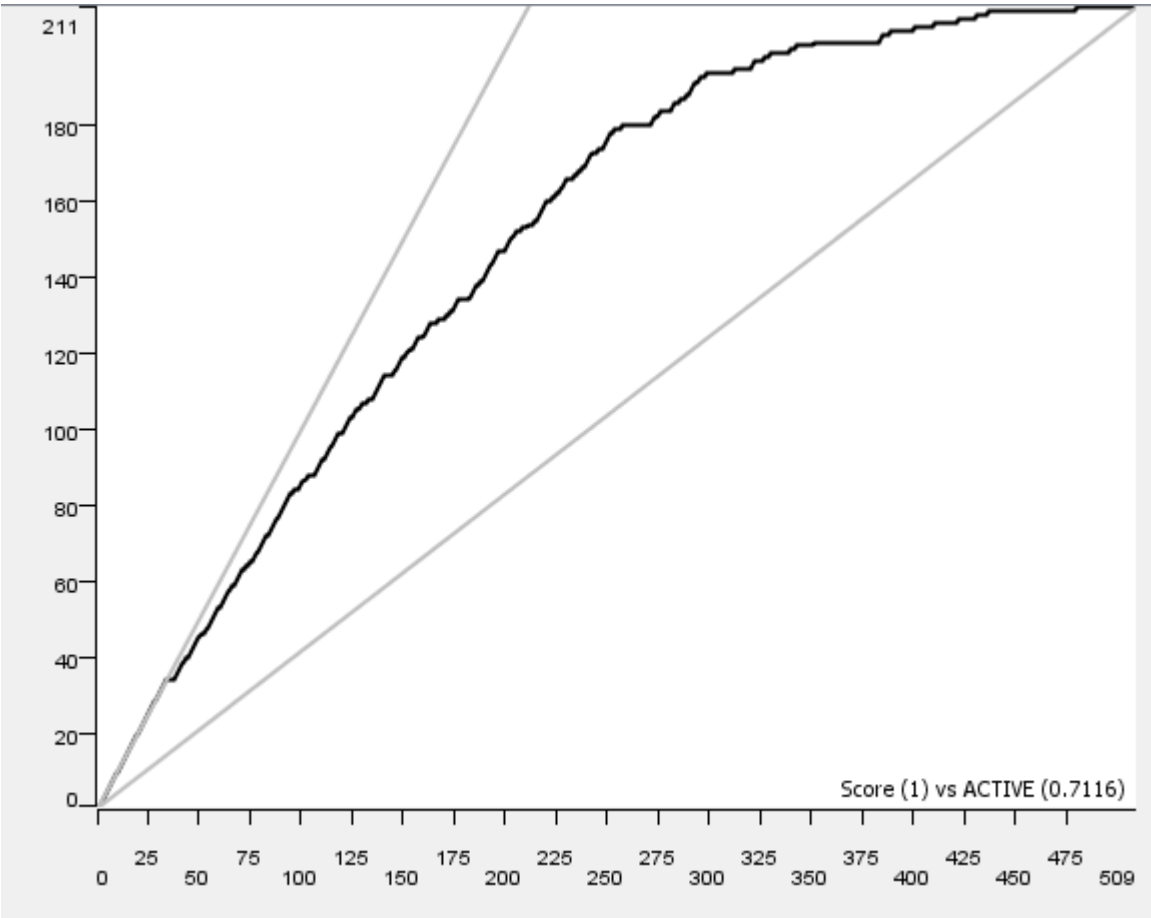

|          | Predicted Active | Predicted Inactive |
|----------|------------------|--------------------|
| Active   | 177              | 34                 |
| Inactive | 74               | 224                |

<15nM DefGood in HIV Protease, 20% error;  
Random seed = 121783

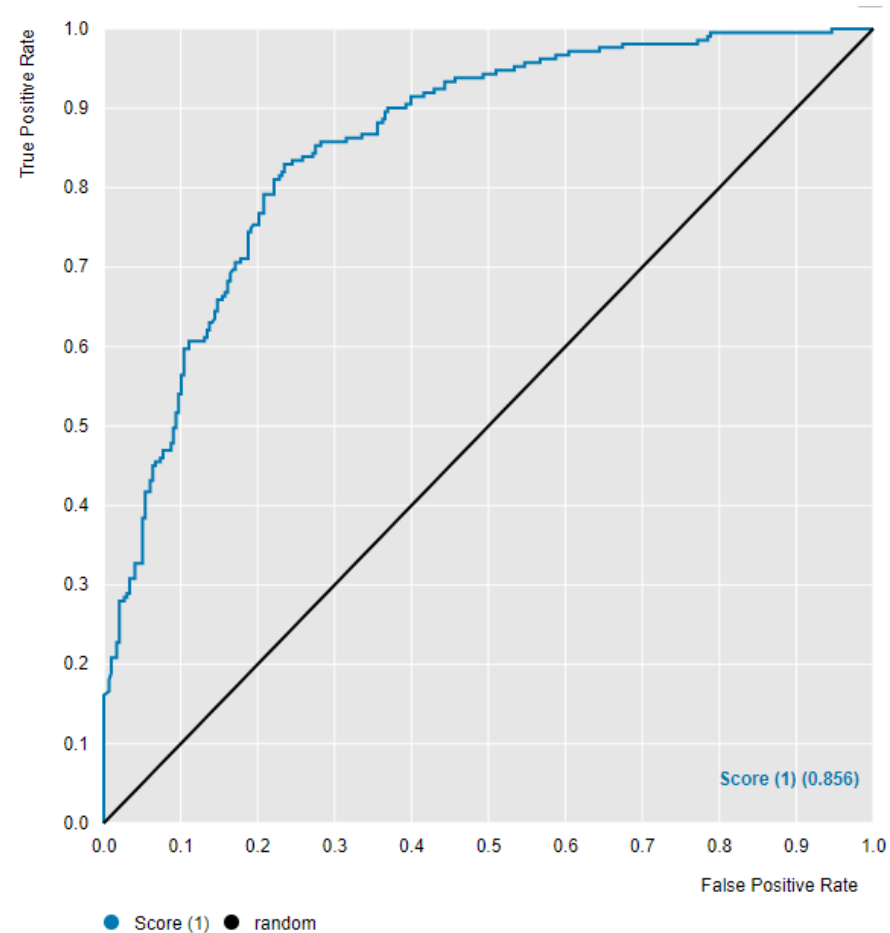

N=509

| Top 10% Mean IC50 | 10.6 nM |
|-------------------|---------|
|-------------------|---------|

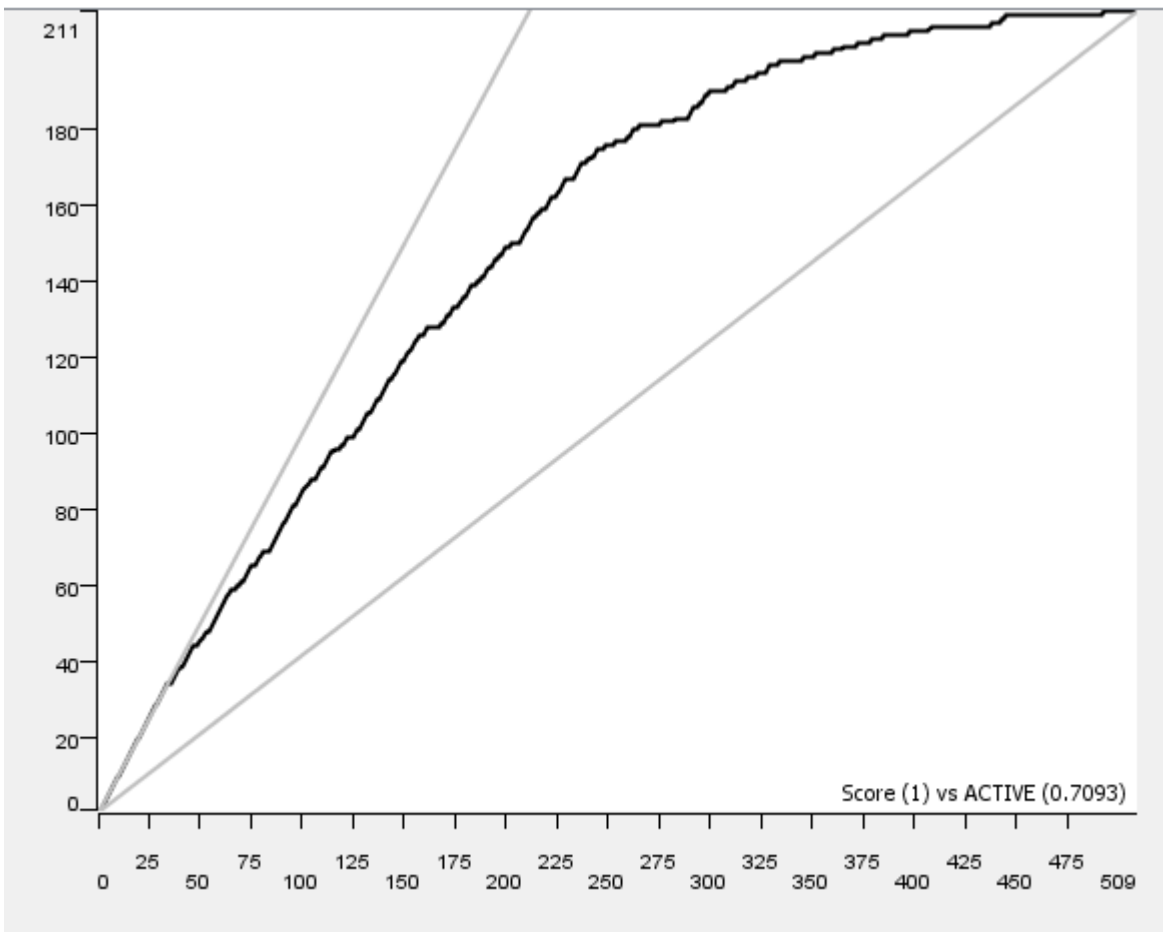

|          | Predicted Active | Predicted Inactive |
|----------|------------------|--------------------|
| Active   | 175              | 36                 |
| Inactive | 70               | 228                |

<15nM DefGood in HIV Protease, 30% error;  
Random seed = 121783

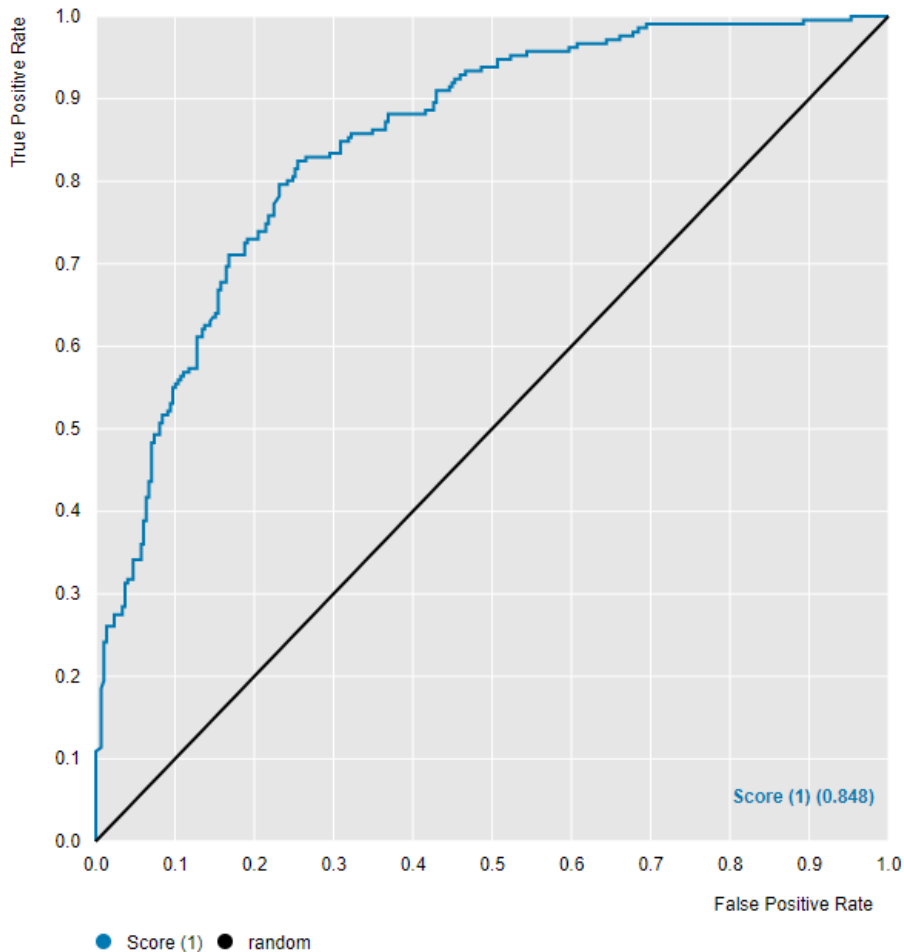

N=509

| Top 10% Mean IC50 | 7.52 nM |
|-------------------|---------|
|-------------------|---------|

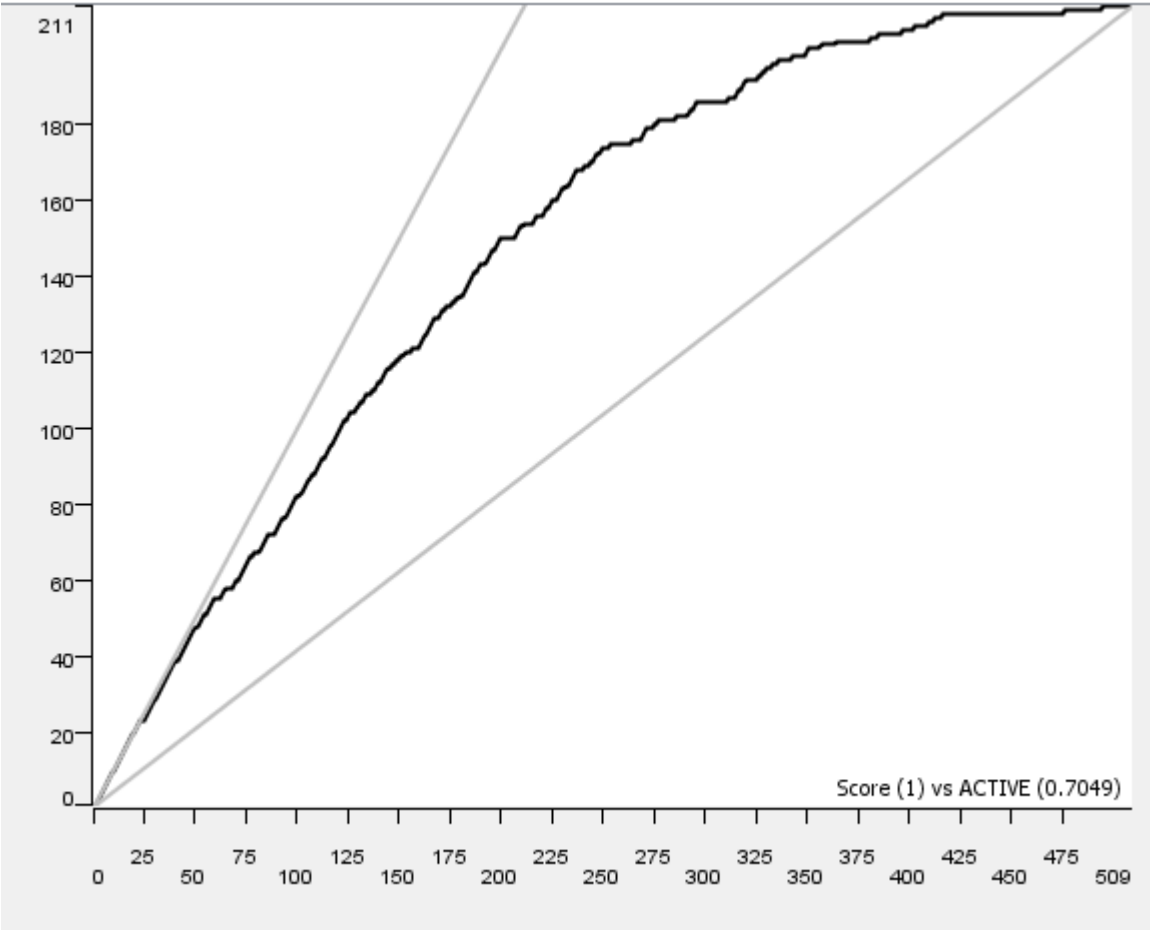

|          | Predicted Active | Predicted Inactive |
|----------|------------------|--------------------|
| Active   | 168              | 43                 |
| Inactive | 71               | 227                |

<15nM DefGood in HIV Protease, 40% error;  
Random seed = 121783

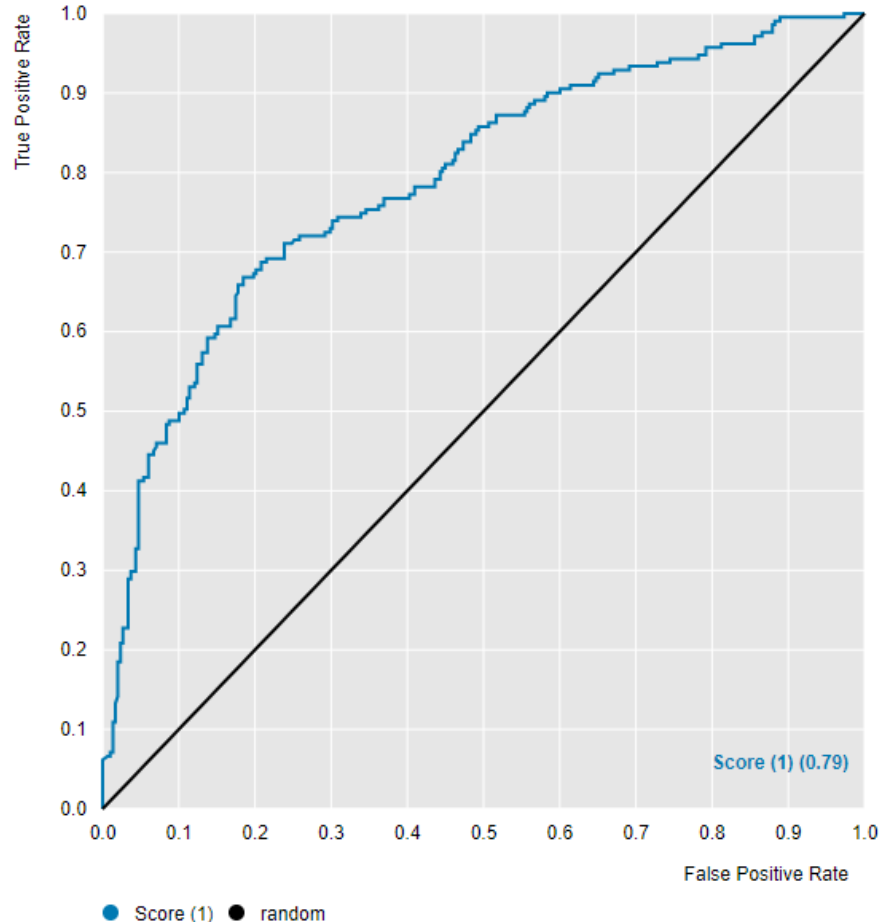

N=509

| Top 10% Mean IC50 | 15.2 nM |
|-------------------|---------|
|-------------------|---------|

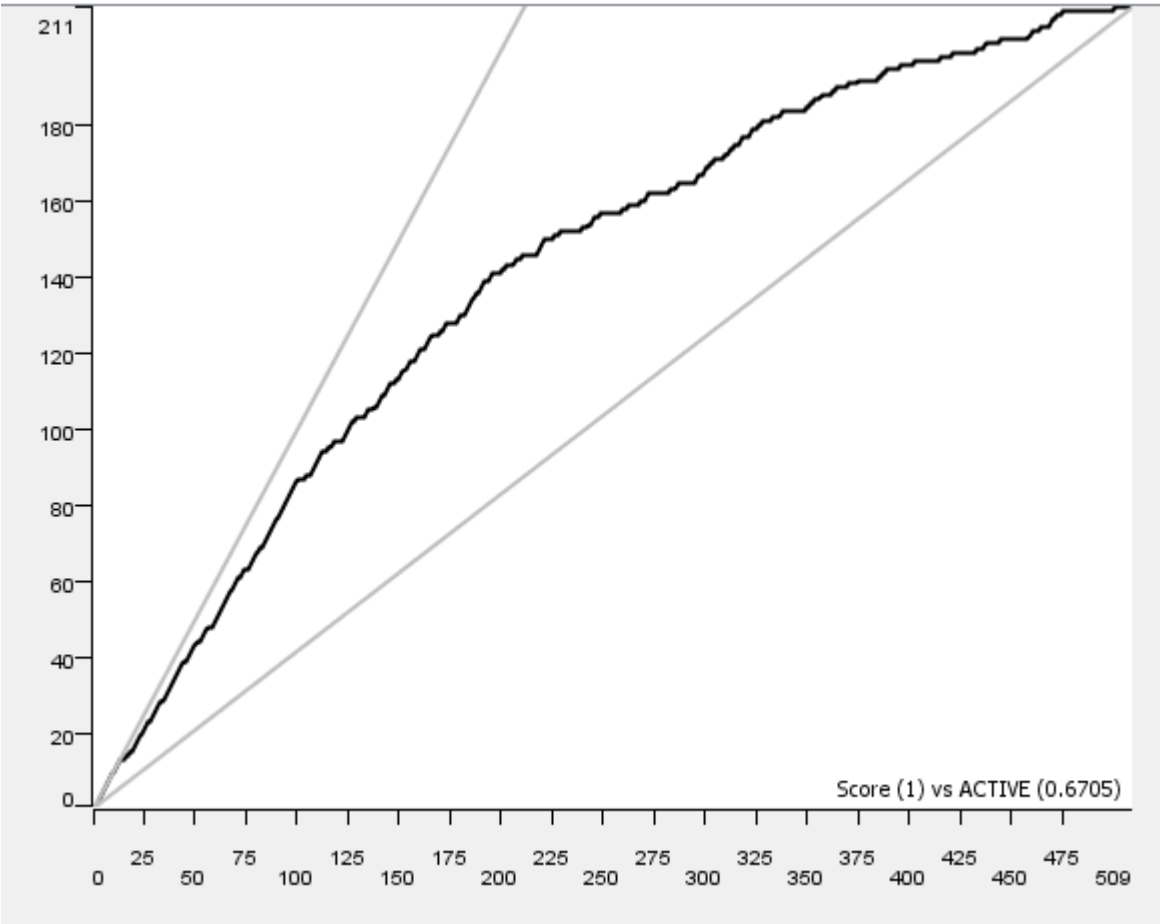

|          | Predicted Active | Predicted Inactive |
|----------|------------------|--------------------|
| Active   | 135              | 76                 |
| Inactive | 52               | 246                |

<15nM DefGood in HIV Protease, 45% error;  
Random seed = 121783

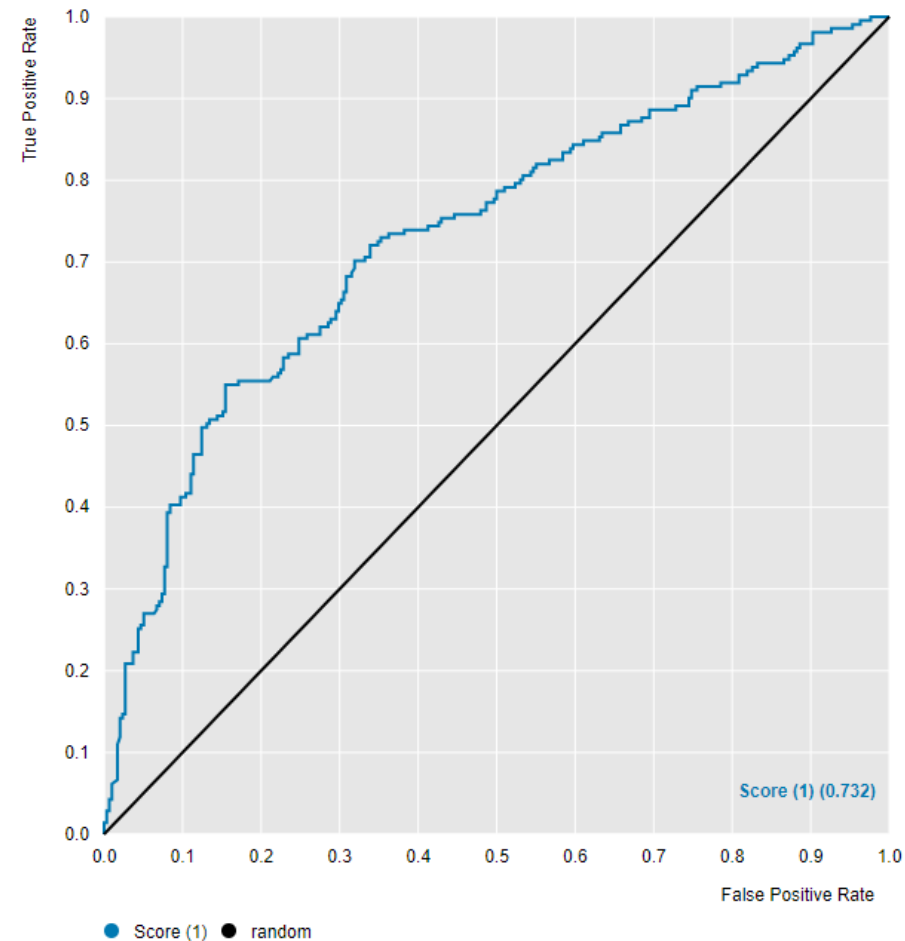

N=509

|                   |         |
|-------------------|---------|
| Top 10% Mean IC50 | 16.5 nM |
|-------------------|---------|

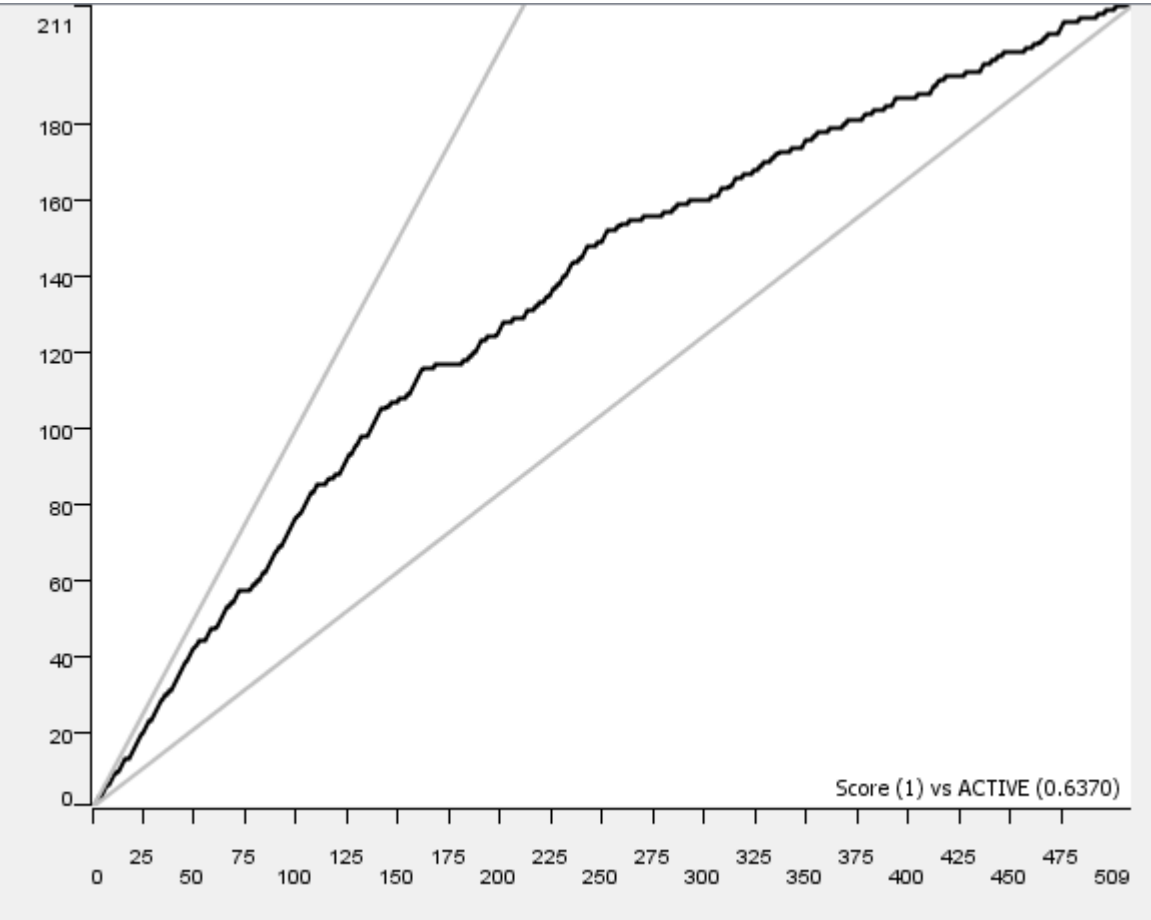

|          | Predicted Active | Predicted Inactive |
|----------|------------------|--------------------|
| Active   | 152              | 59                 |
| Inactive | 104              | 194                |

<15nM DefGood in HIV Protease, 50% error;  
Random seed = 121783

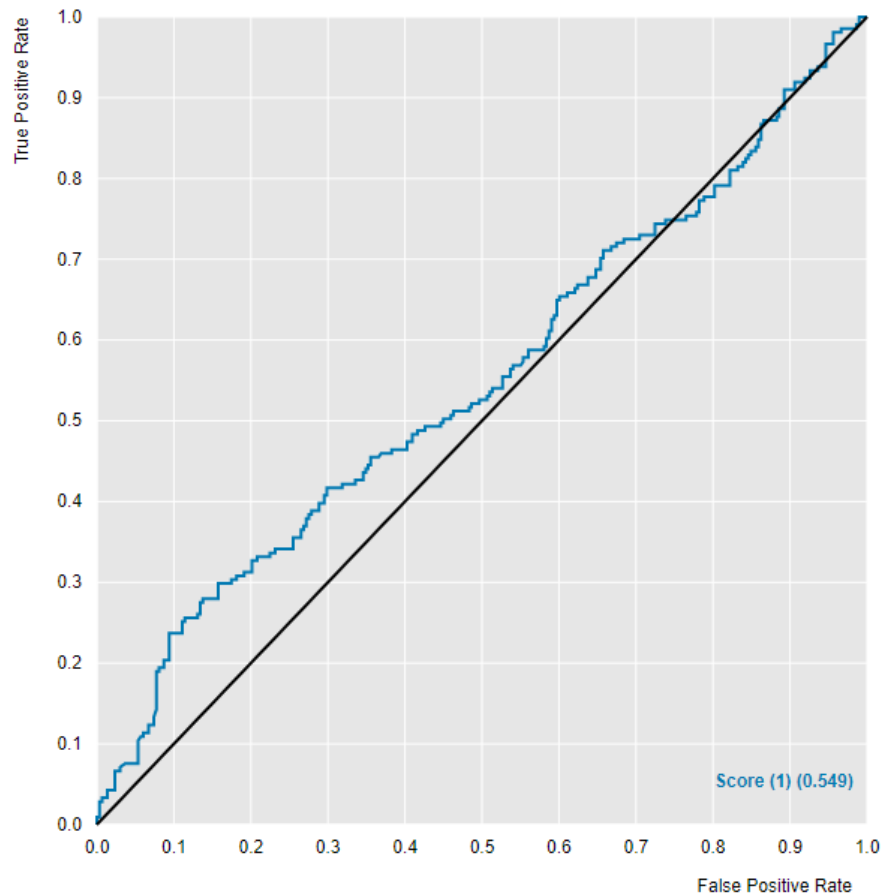

N=509

● Score (1) ● random

| Top 10% Mean IC50 | 12,000 nM |
|-------------------|-----------|
|-------------------|-----------|

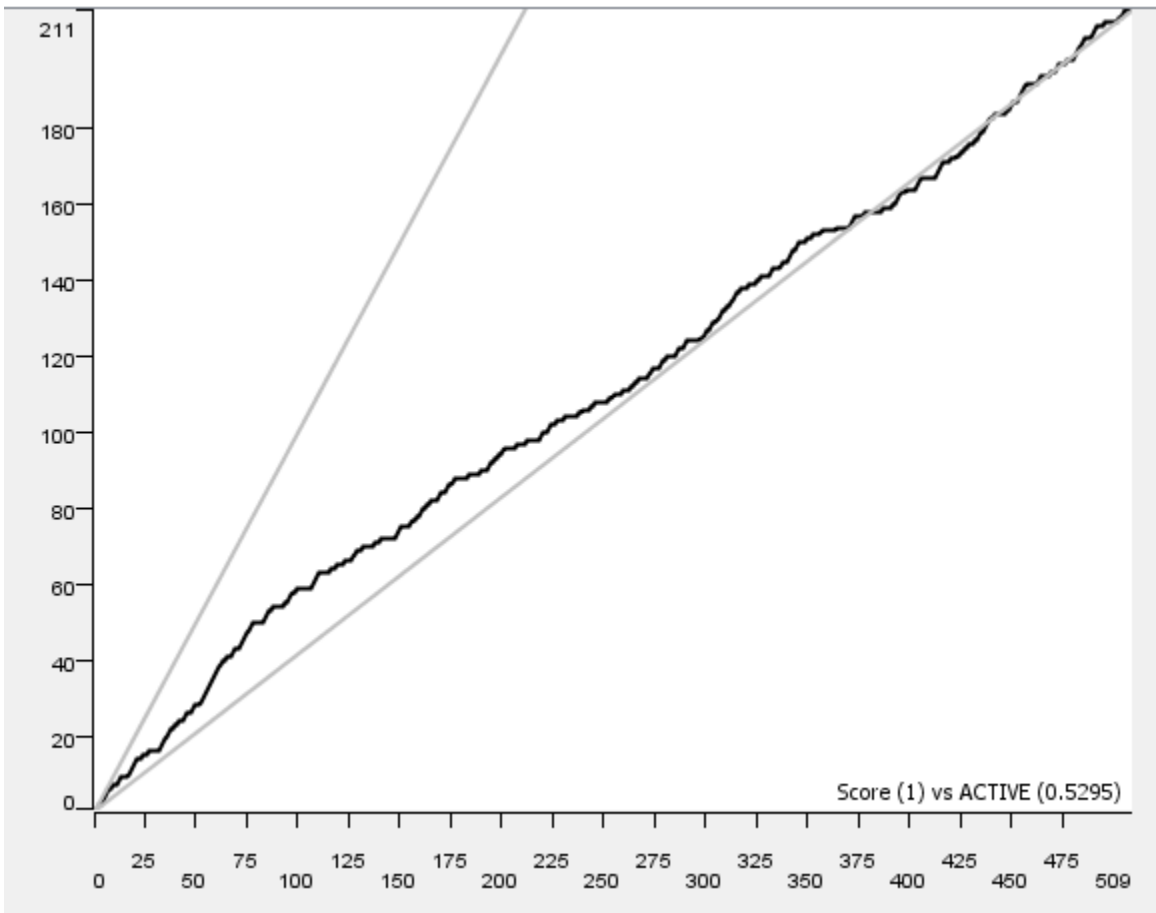

|          | Predicted Active | Predicted Inactive |
|----------|------------------|--------------------|
| Active   | 194              | 17                 |
| Inactive | 274              | 24                 |

# Conclusion - NBN

- An NBN could be generated for HIV Protease with a decision value of  $<15$  nM as defined as active. The predictivity of the algorithm could be preserved in three random train/test cycles. The point of failure was 50%, 45% and 50% error.

# RF Error Tolerance- <15 nM DefGood in HIV Protease

- 0-50% absolute error



# RF- <15nM DefGood in HIV Protease, 10% error

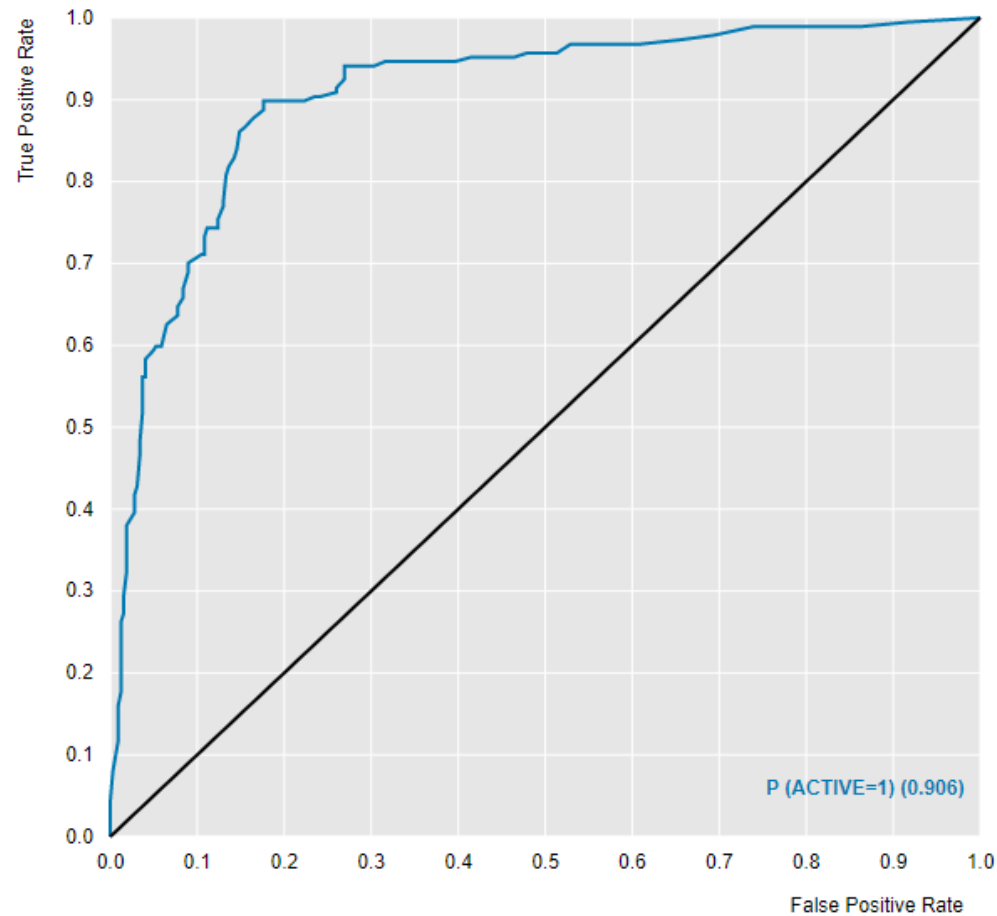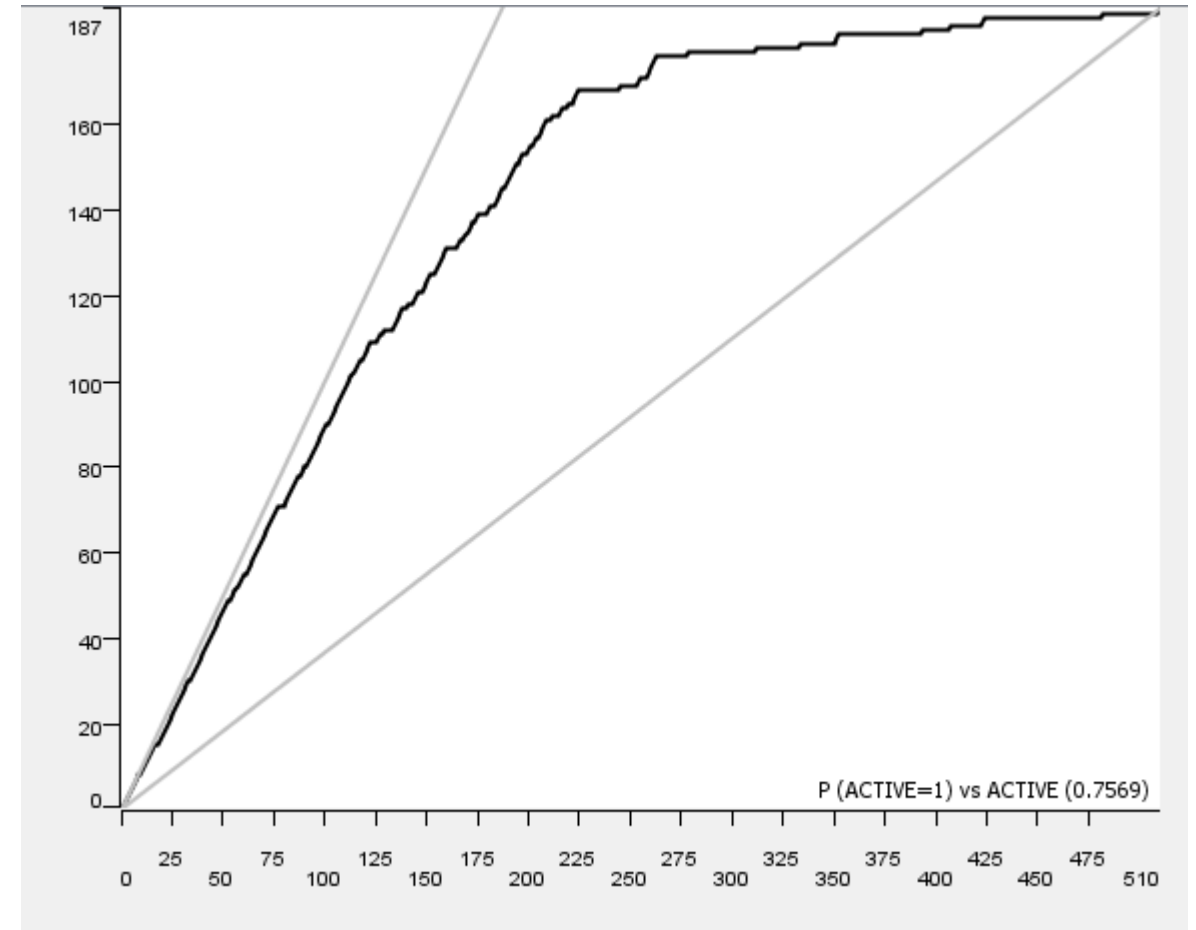

N=510

● P (ACTIVE=1) ● random

Top 10% Mean  
IC50

12.7 nM

|          | Predicted Active | Predicted Inactive |
|----------|------------------|--------------------|
| Active   | 139              | 48                 |
| Inactive | 39               | 284                |

# RF- <15nM DefGood in HIV Protease, 20% error

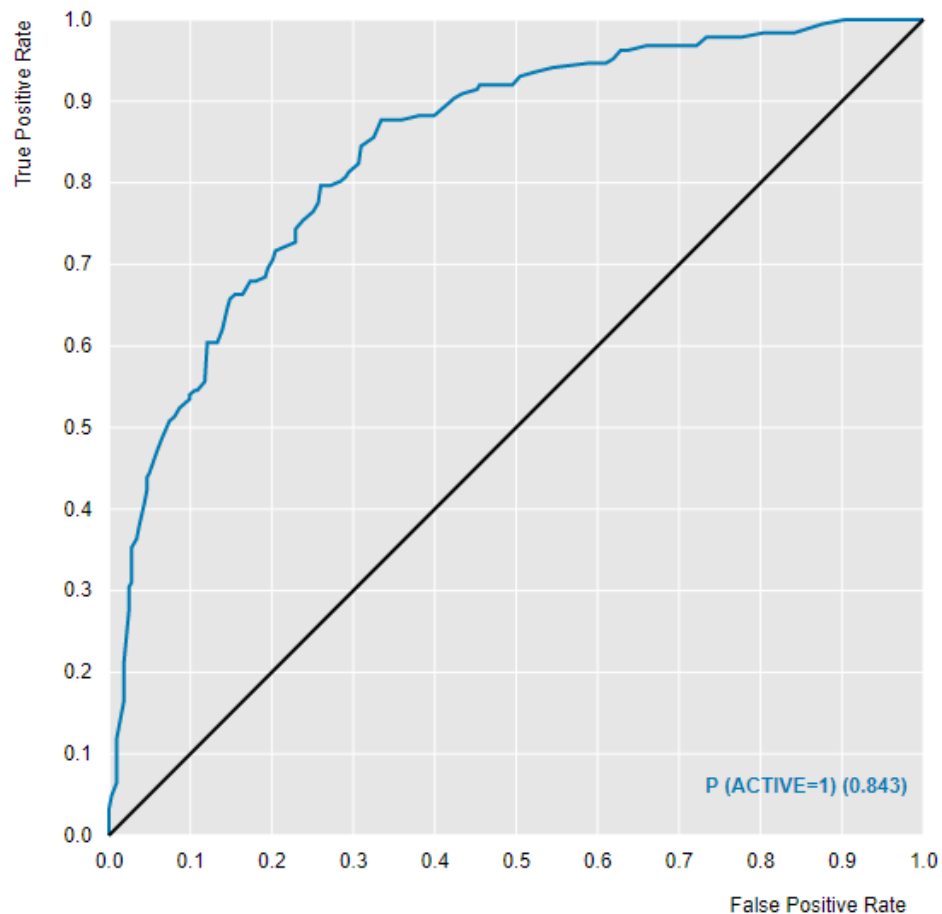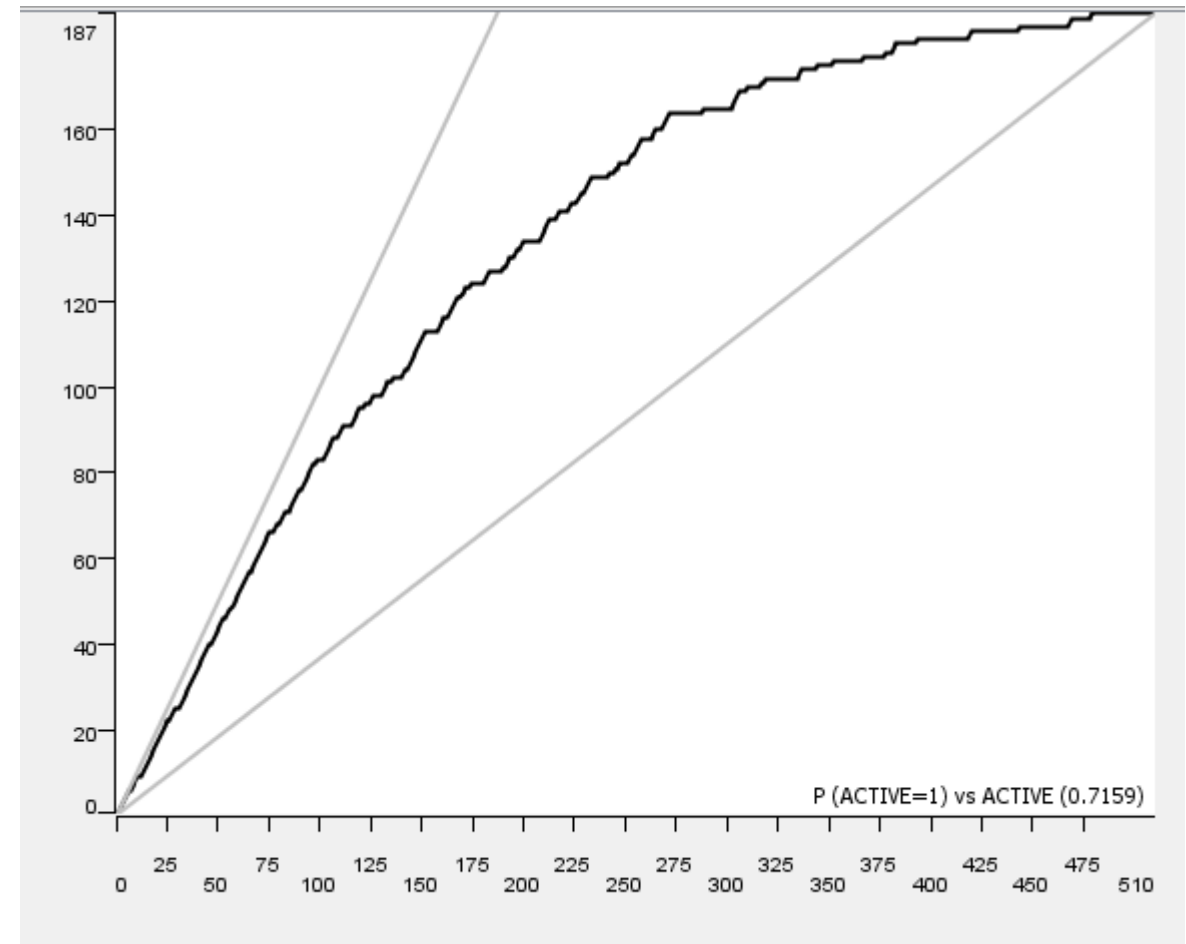

N=510

● P (ACTIVE=1) ● random

Top 10% Mean  
IC50

14.7 nM

|          | Predicted Active | Predicted Inactive |
|----------|------------------|--------------------|
| Active   | 130              | 57                 |
| Inactive | 63               | 260                |

# RF- <15nM DefGood in HIV Protease, 30% error

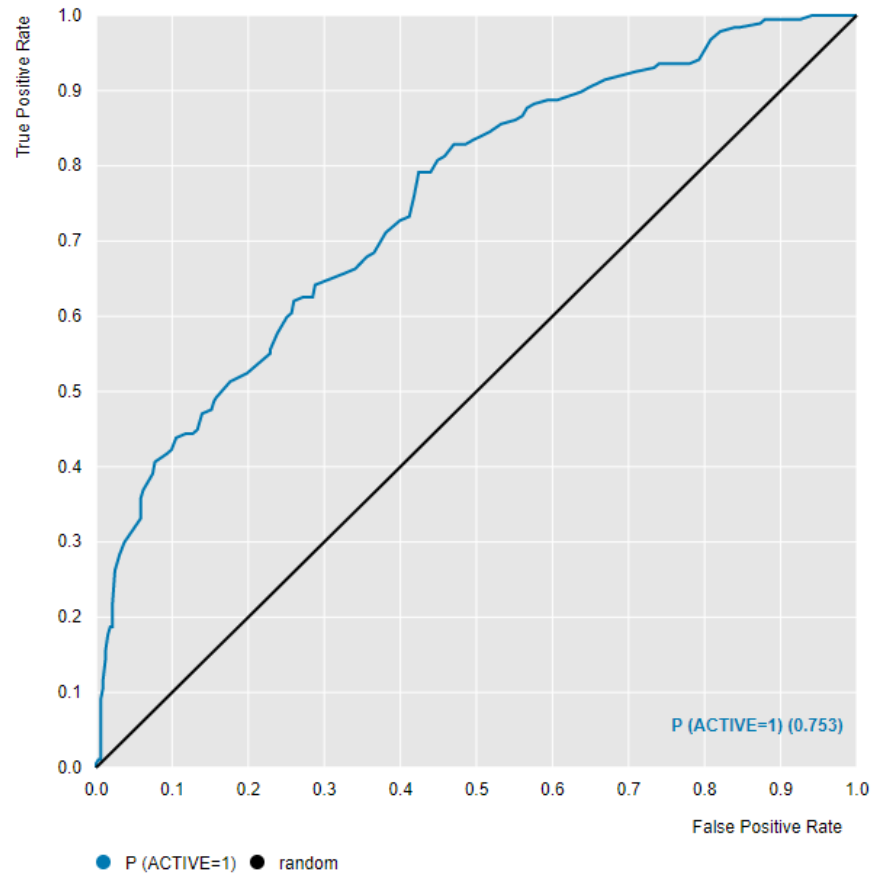

N=510

| Top 10% Mean IC50 | 10.2 nM |
|-------------------|---------|
|-------------------|---------|

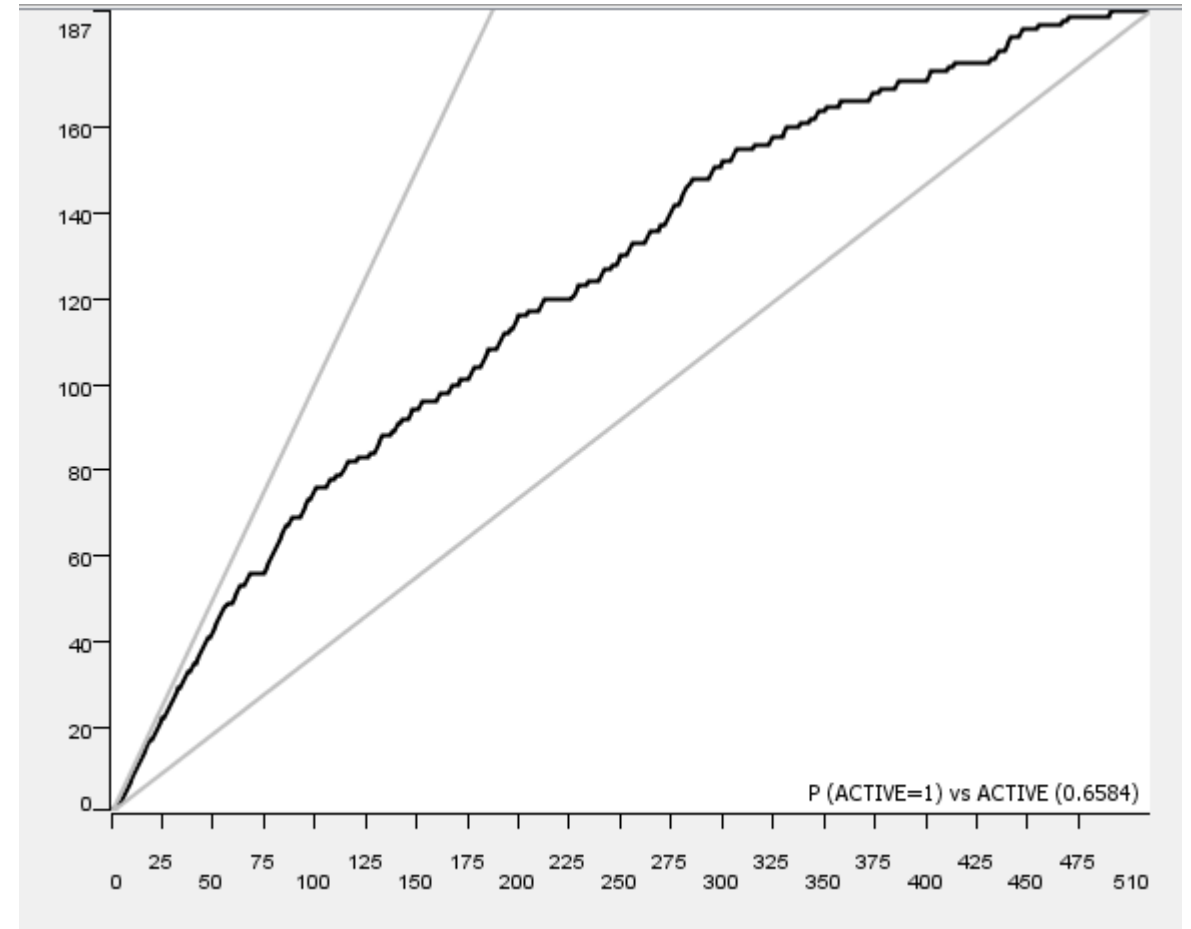

|          | Predicted Active | Predicted Inactive |
|----------|------------------|--------------------|
| Active   | 116              | 71                 |
| Inactive | 84               | 239                |

# RF- <15nM DefGood in HIV Protease, 35% error

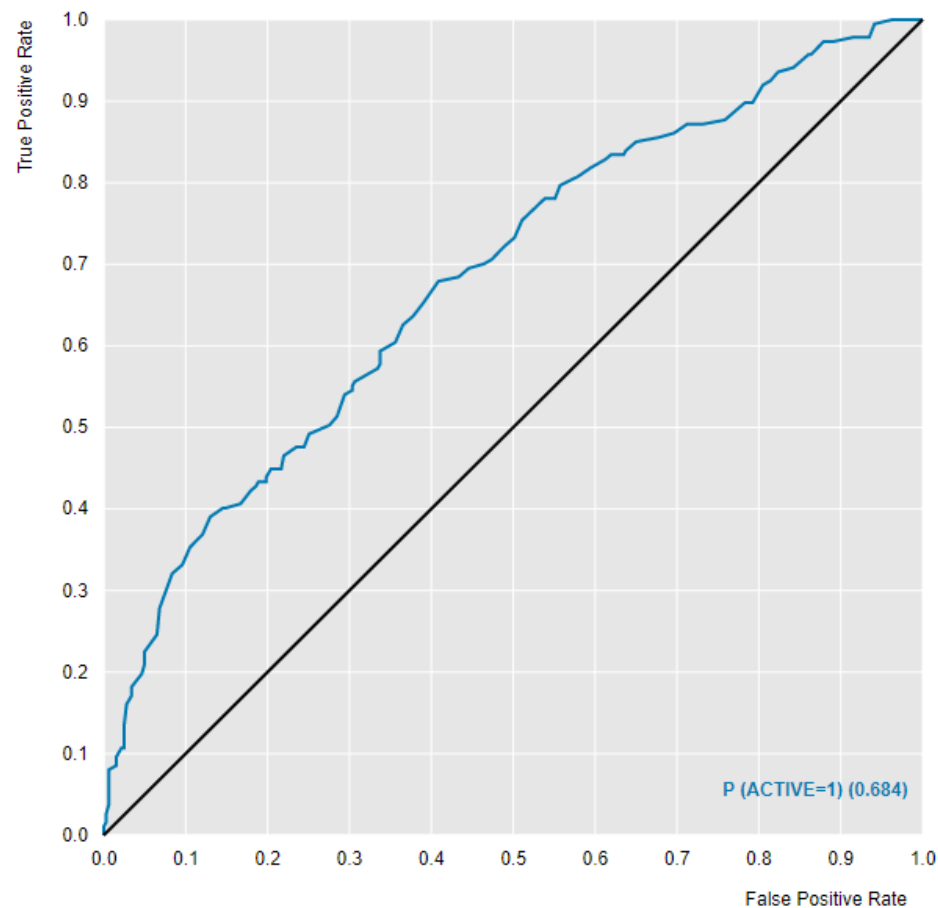

N=510

● P (ACTIVE=1) ● random

|                      |          |
|----------------------|----------|
| Top 10% Mean<br>IC50 | 3,700 nM |
|----------------------|----------|

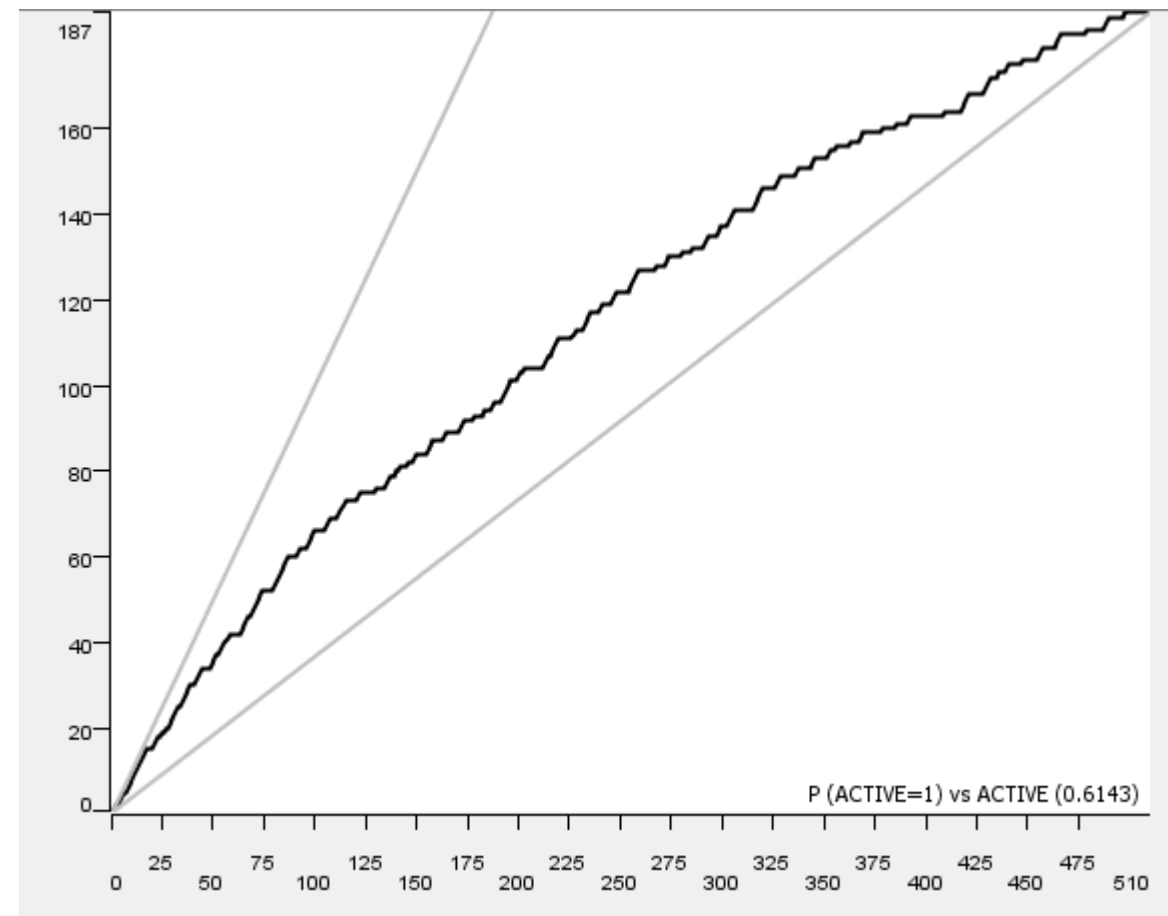

|          | Predicted Active | Predicted Inactive |
|----------|------------------|--------------------|
| Active   | 103              | 84                 |
| Inactive | 98               | 225                |

<15nM DefGood in HIV Protease, 10% error;  
Random seed = 429

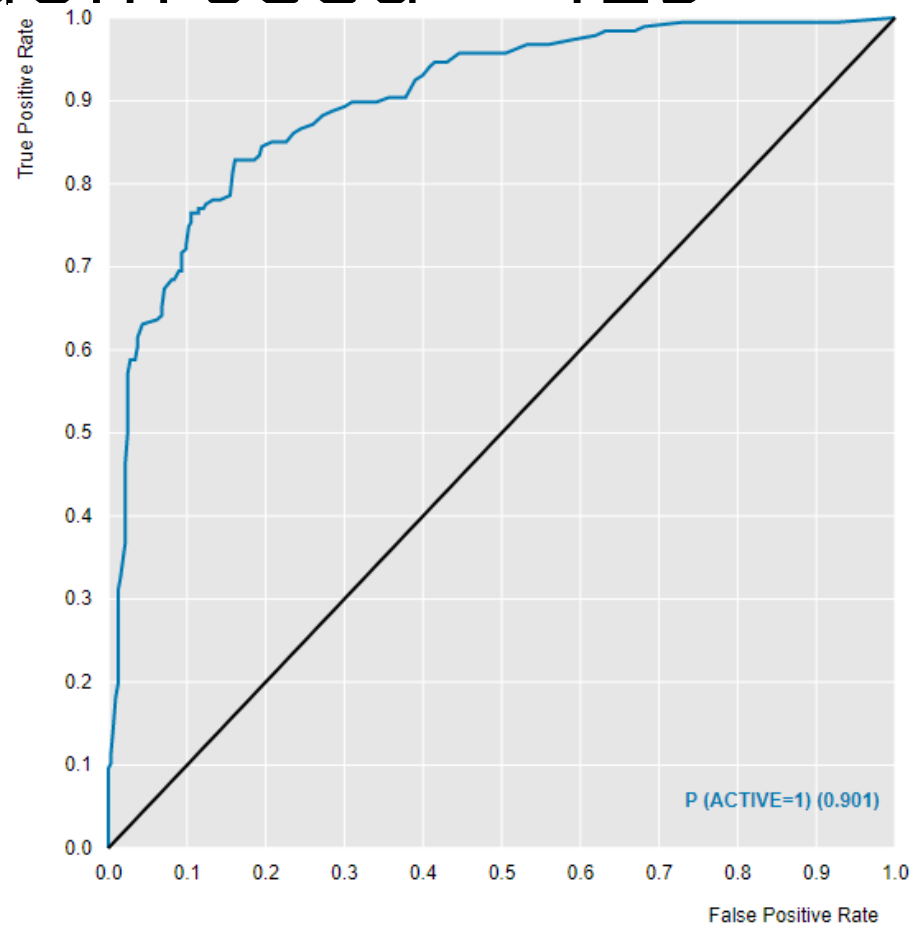

N=510

● P (ACTIVE=1) ● random

| Top 10% Mean IC50 | 10.2 nM |
|-------------------|---------|
|-------------------|---------|

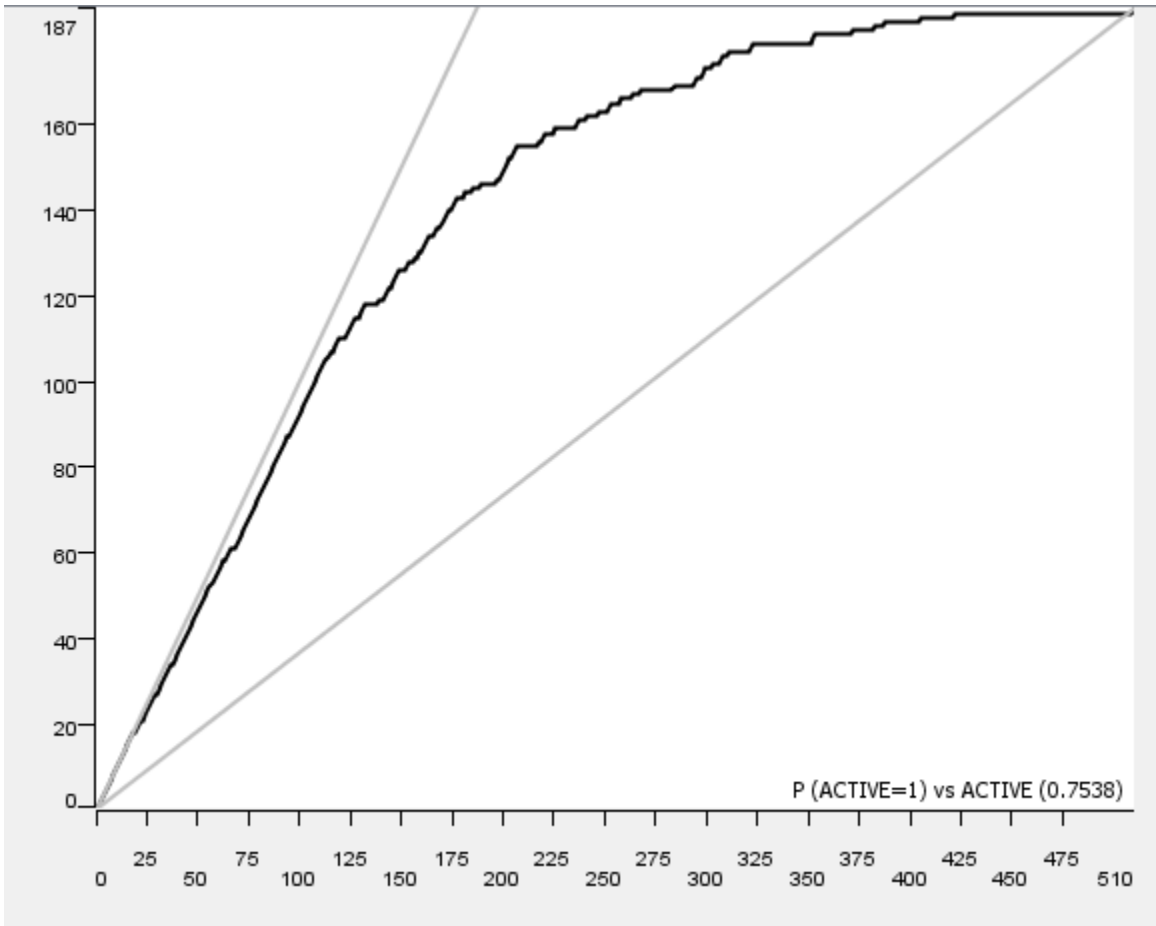

|          | Predicted Active | Predicted Inactive |
|----------|------------------|--------------------|
| Active   | 143              | 44                 |
| Inactive | 37               | 286                |

<15nM DefGood in HIV Protease, 15% error;  
Random seed = 429

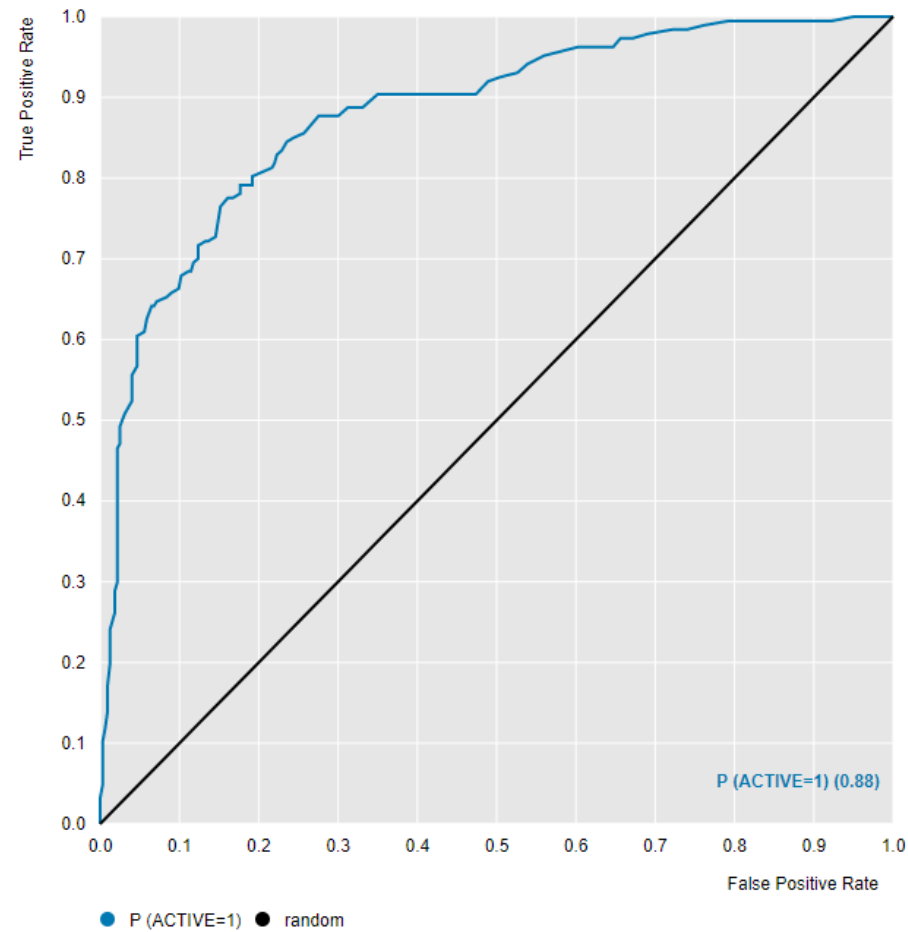

N=510

| Top 10% Mean IC50 | 10.3 nM |
|-------------------|---------|
|-------------------|---------|

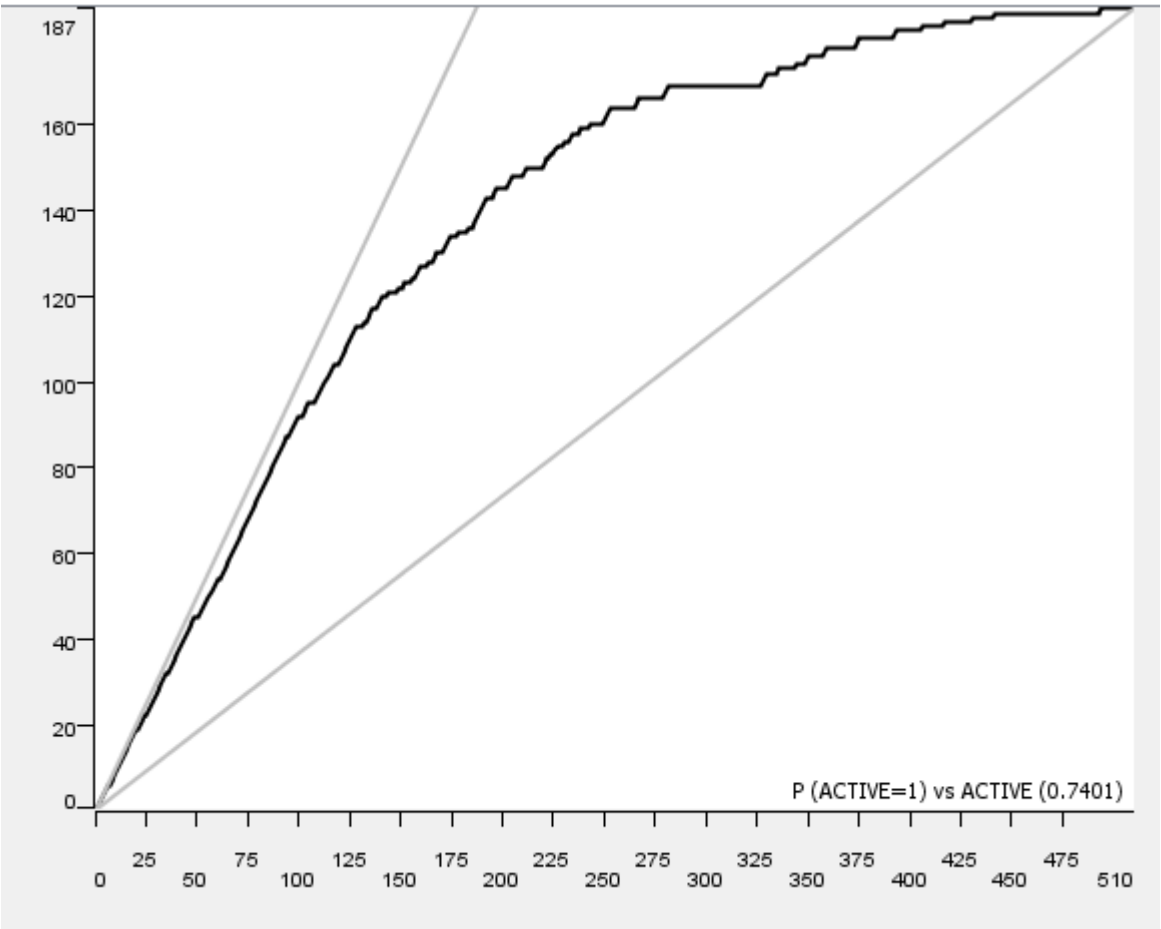

|          | Predicted Active | Predicted Inactive |
|----------|------------------|--------------------|
| Active   | 135              | 52                 |
| Inactive | 44               | 279                |

# <15nM DefGood in HIV Protease, 20% error; Random seed = 429

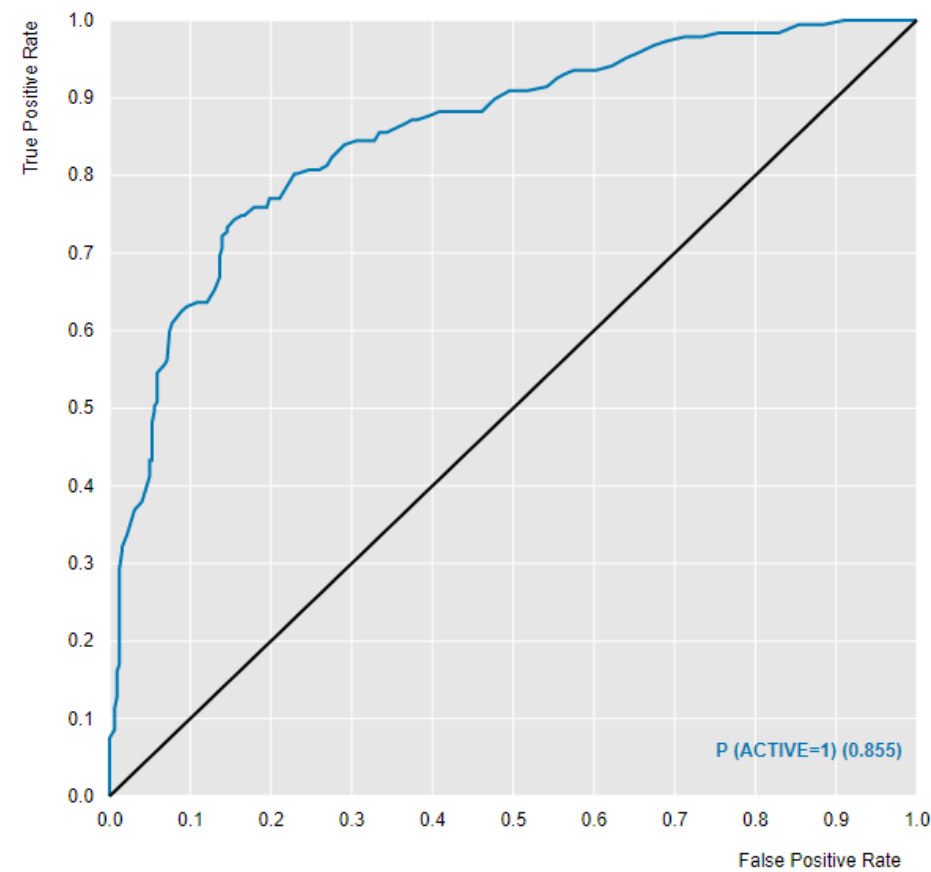

N=510

● P (ACTIVE=1) ● random

| Top 10% Mean IC50 | 941 nM<br>One 47,000 nM mistake |
|-------------------|---------------------------------|
|-------------------|---------------------------------|

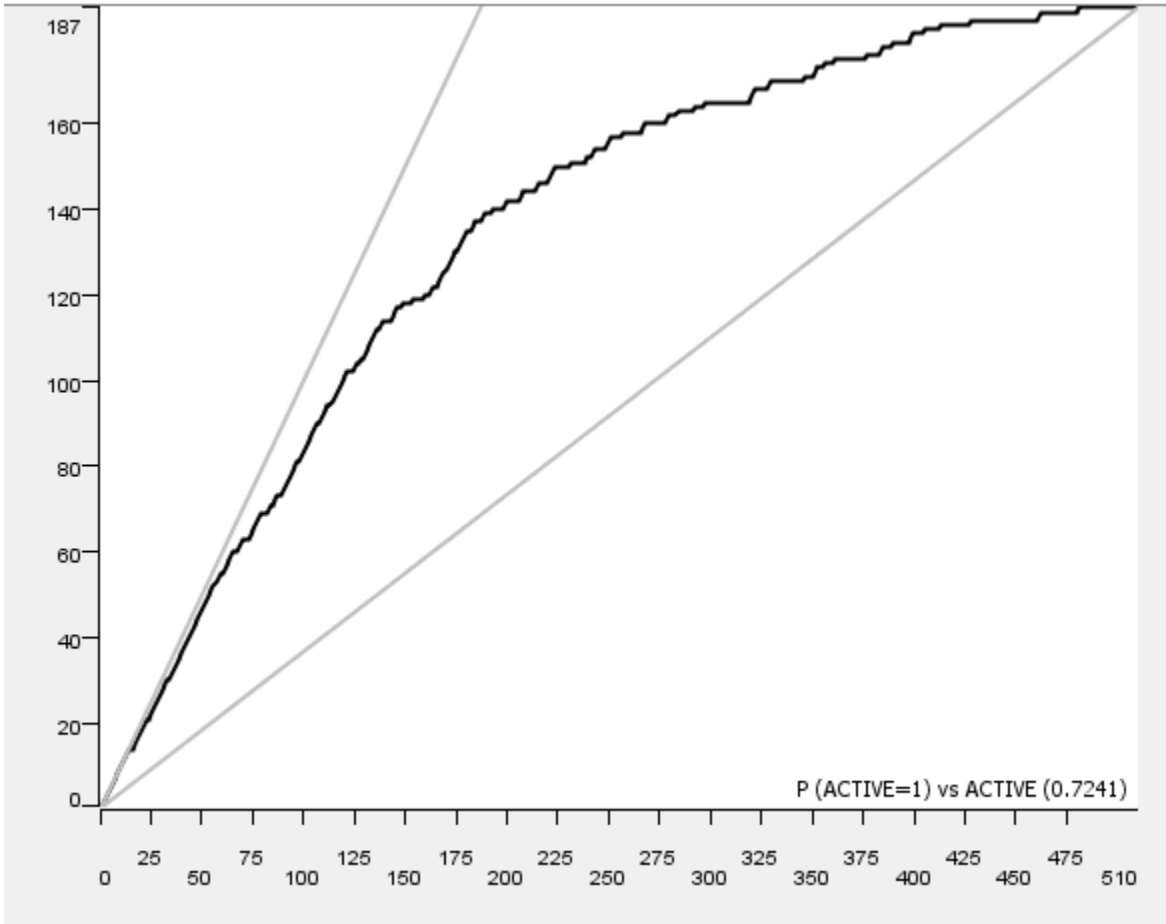

|          | Predicted Active | Predicted Inactive |
|----------|------------------|--------------------|
| Active   | 139              | 48                 |
| Inactive | 50               | 273                |

<15nM DefGood in HIV Protease, 10% error;  
Random seed = 121783

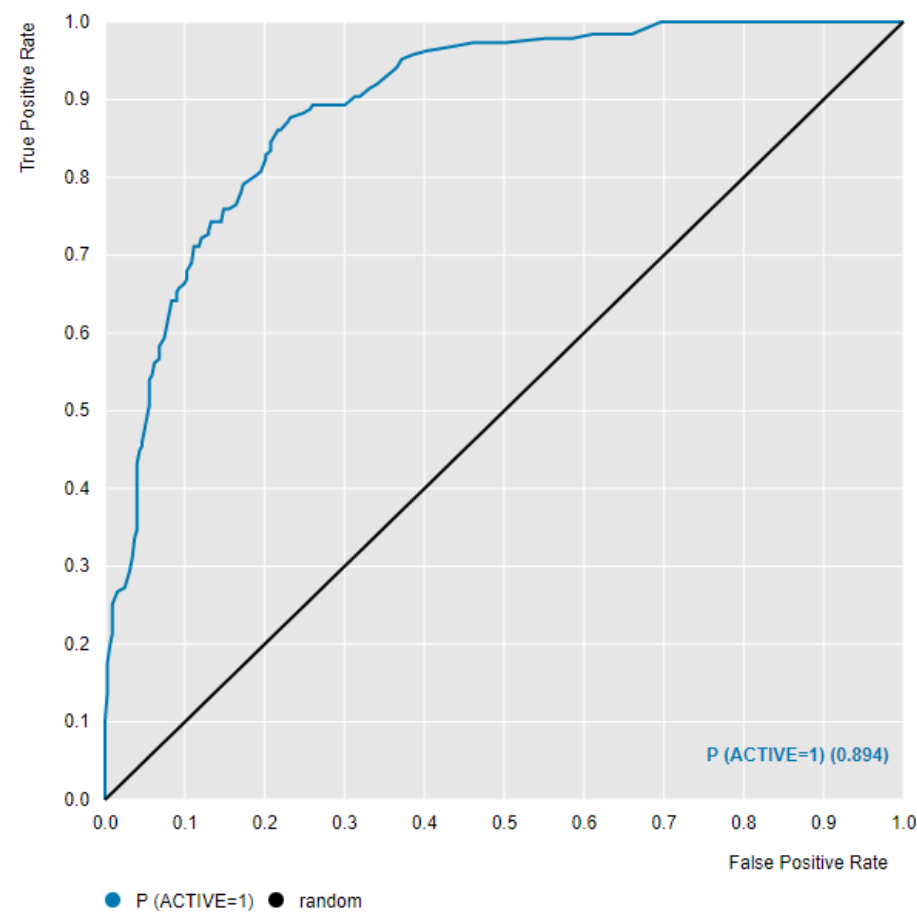

N=510

| Top 10% Mean<br>IC50 | 17.9 nM |
|----------------------|---------|
|----------------------|---------|

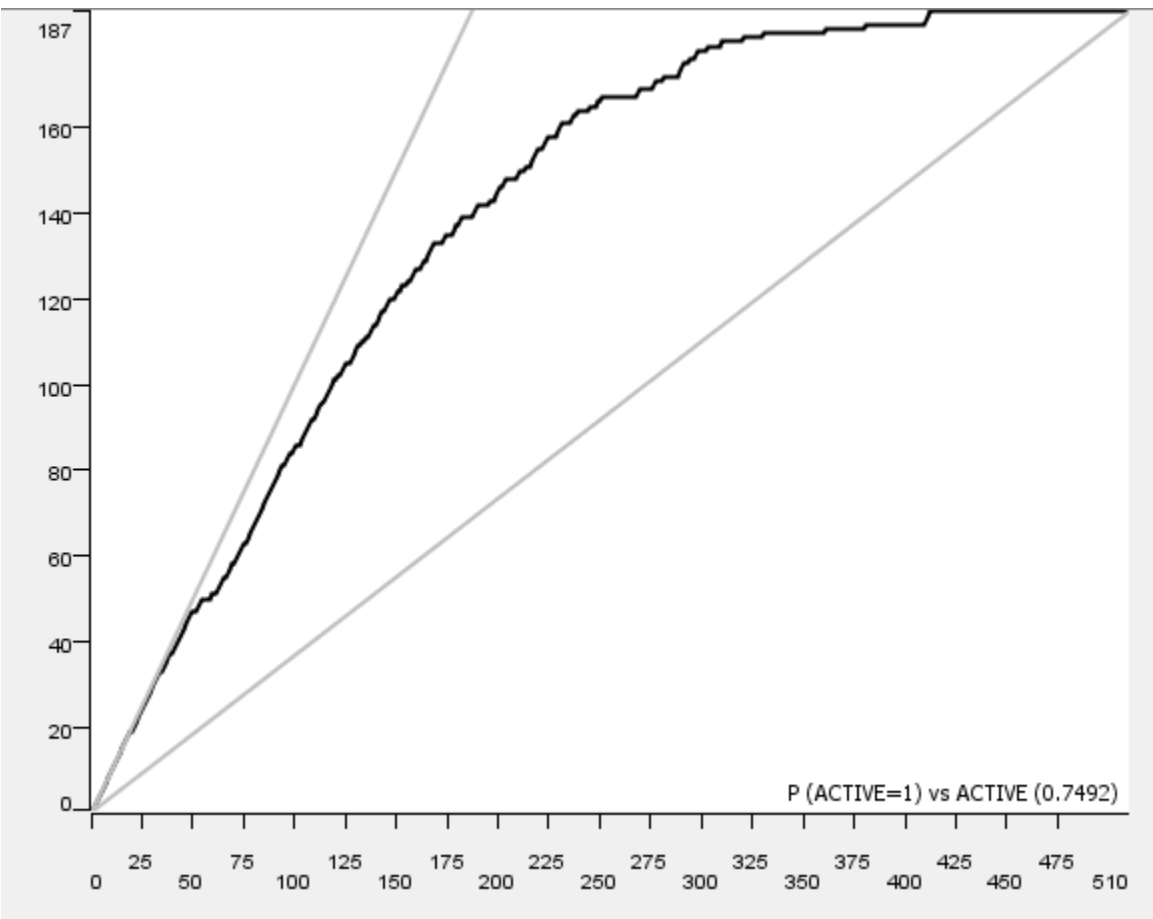

|          | Predicted Active | Predicted Inactive |
|----------|------------------|--------------------|
| Active   | 133              | 54                 |
| Inactive | 36               | 287                |



<15nM DefGood in HIV Protease, 15% error;  
Random seed = 121783

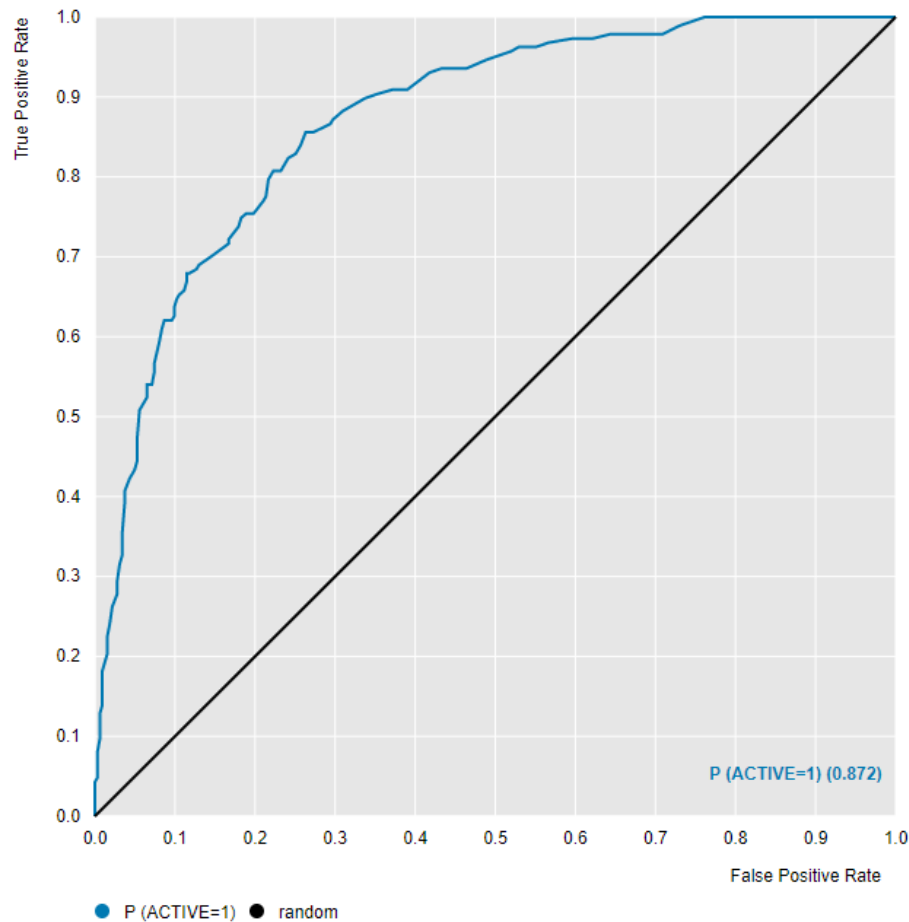

N=510

| Top 10% Mean IC50 | 1,100 nM |
|-------------------|----------|
|-------------------|----------|

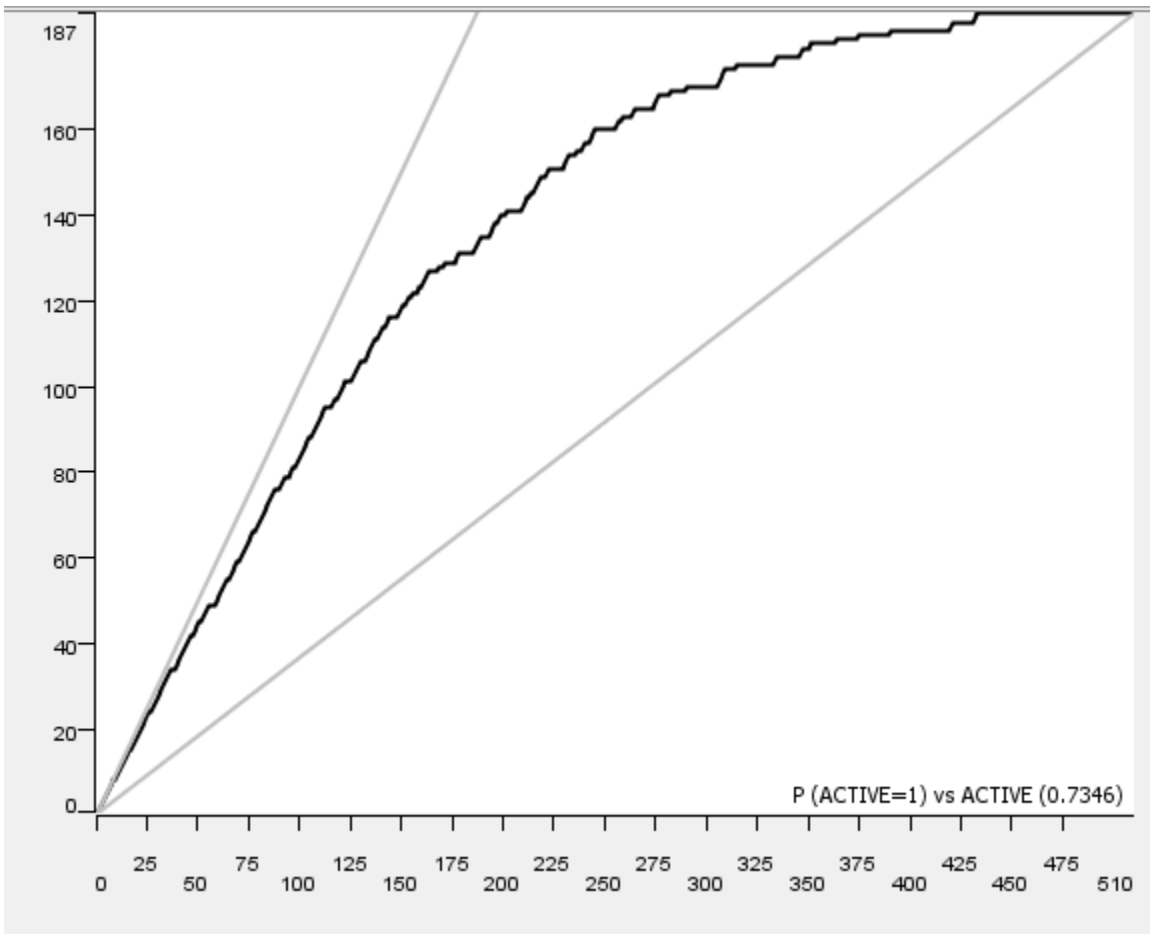

|          | Predicted Active | Predicted Inactive |
|----------|------------------|--------------------|
| Active   | 127              | 60                 |
| Inactive | 37               | 286                |

# Conclusion - RF

- A Random Forrest could be generated for HIV Protease with a decision value of  $<15$  nM as defined as active. The point of failure was 35%, 20% and 15% error.

# PNN Error Tolerance- <15 nM DefGood in HIV Protease

- 0-50% absolute error

# PNN- <15nM DefGood in HIV Protease, 10% error

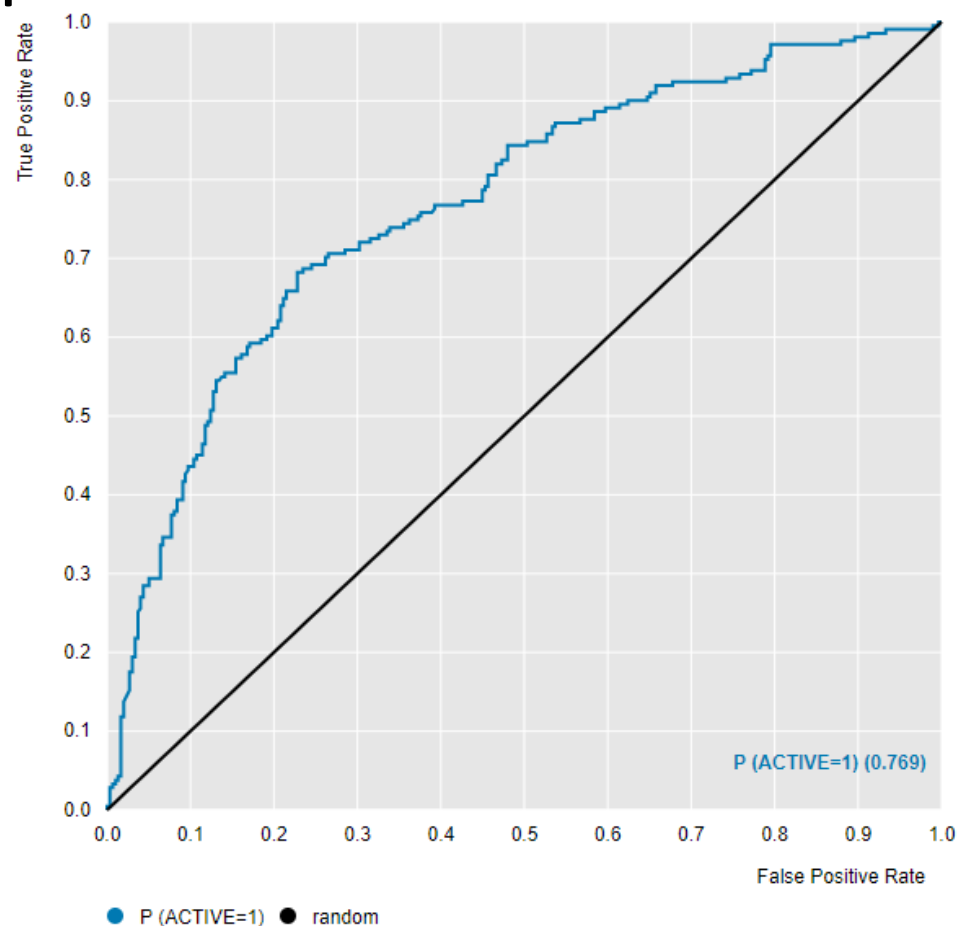

N=509

|                      |        |
|----------------------|--------|
| Top 10% Mean<br>IC50 | 111 nM |
|----------------------|--------|

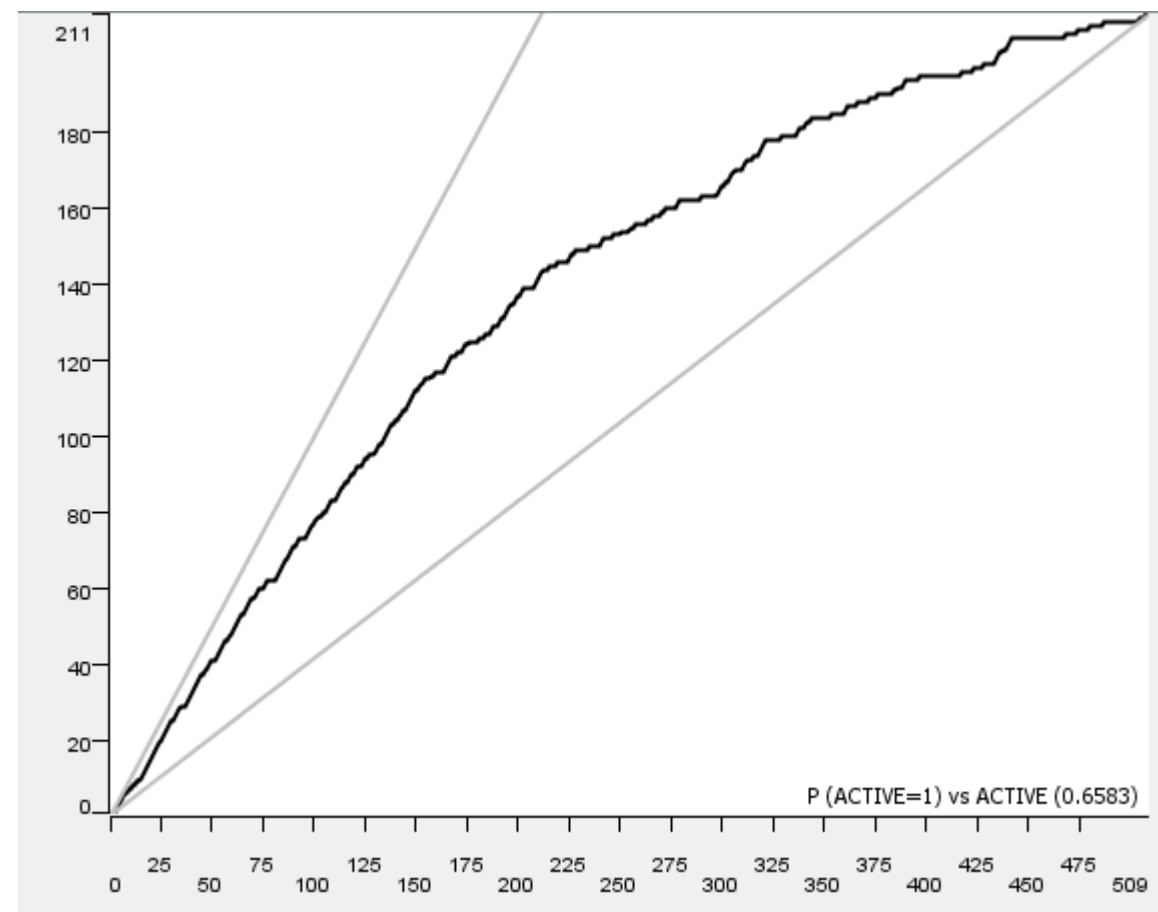

|          | Predicted Active | Predicted Inactive |
|----------|------------------|--------------------|
| Active   | 128              | 83                 |
| Inactive | 59               | 239                |

# PNN- <15nM DefGood in HIV Protease, 20% error

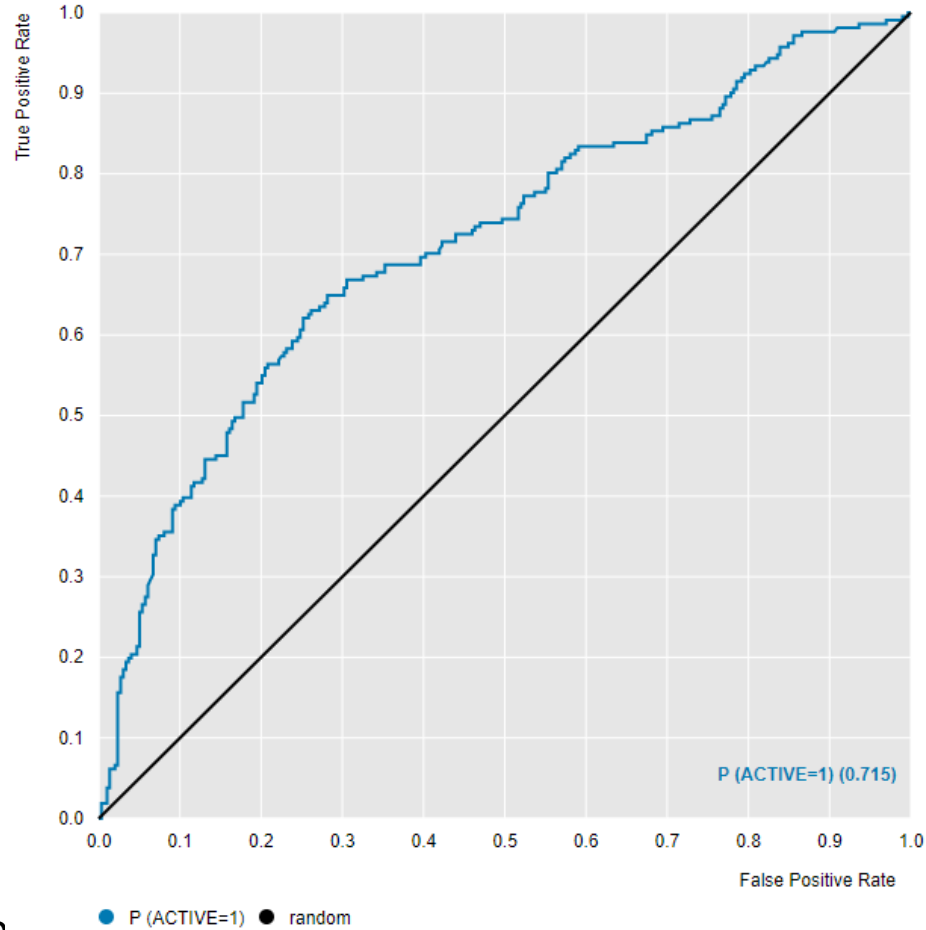

N=509

Top 10% Mean  
IC50

114 nM

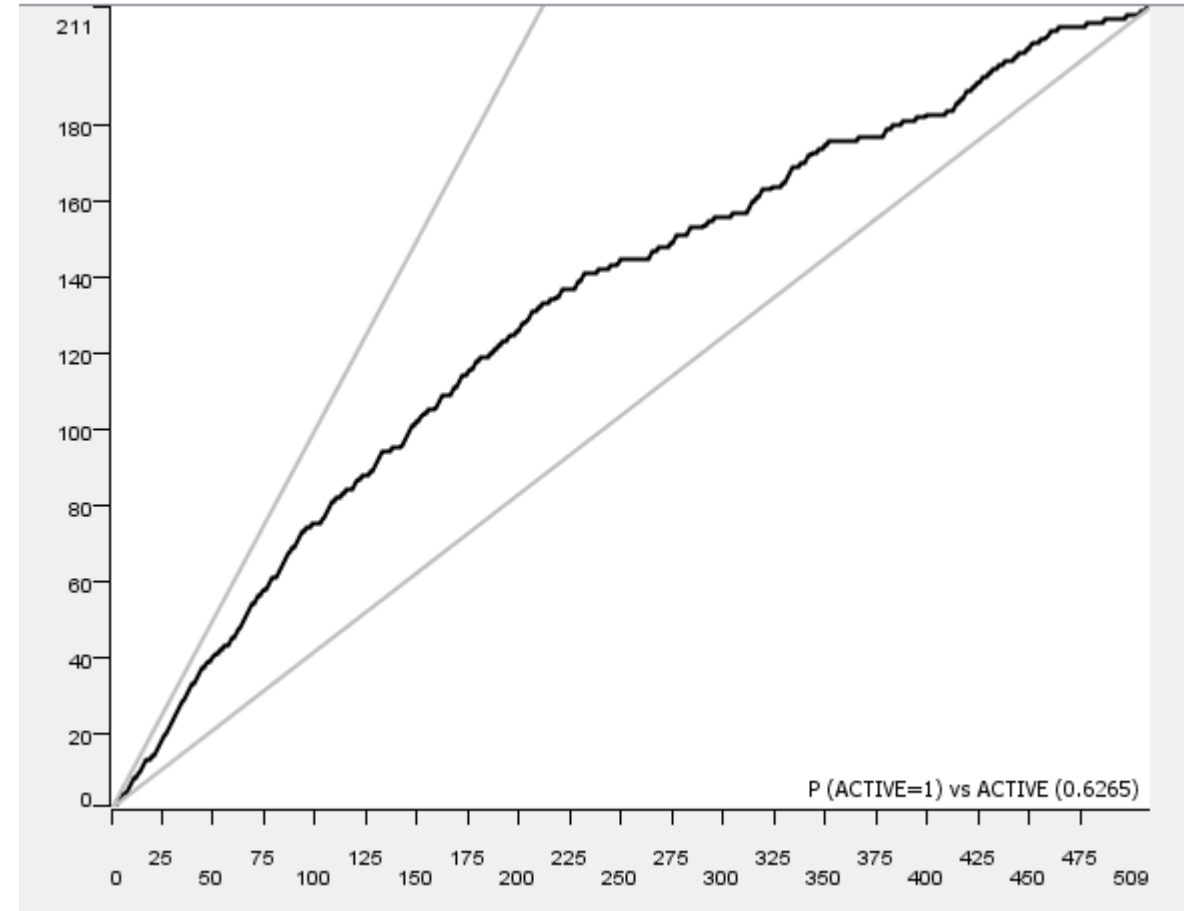

|          | Predicted Active | Predicted Inactive |
|----------|------------------|--------------------|
| Active   | 139              | 72                 |
| Inactive | 91               | 207                |

# PNN- <15nM DefGood in HIV Protease, 25% error

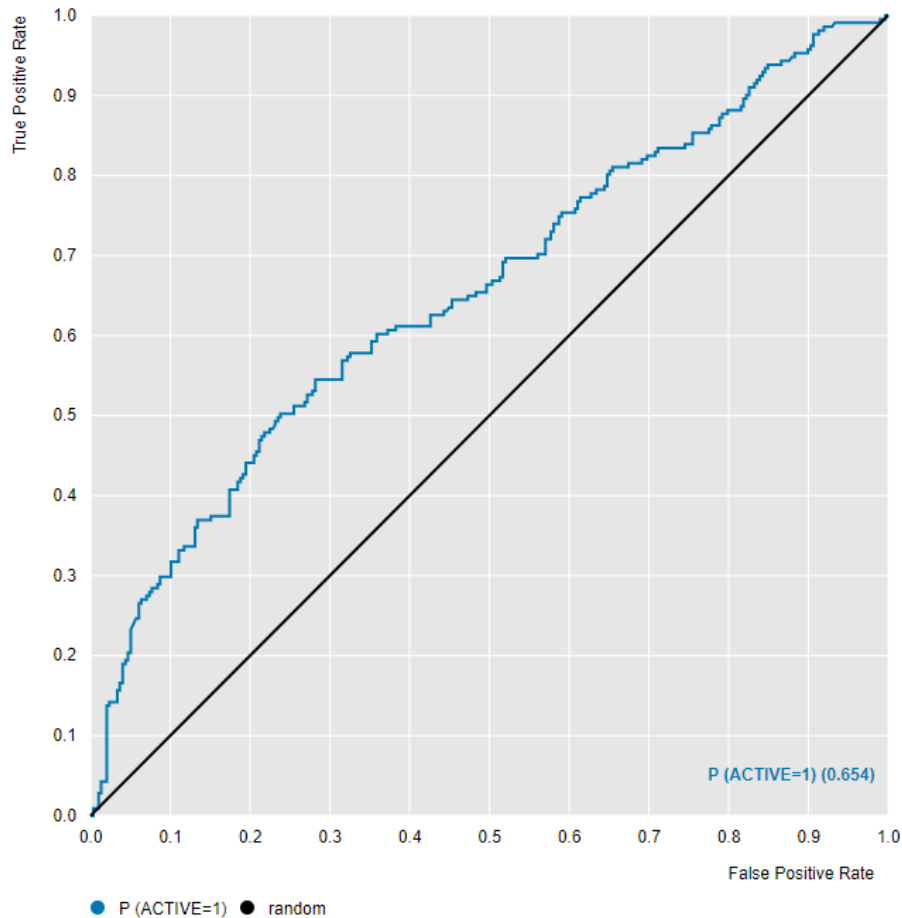

N=509

Top 10% Mean  
IC50

217 nM

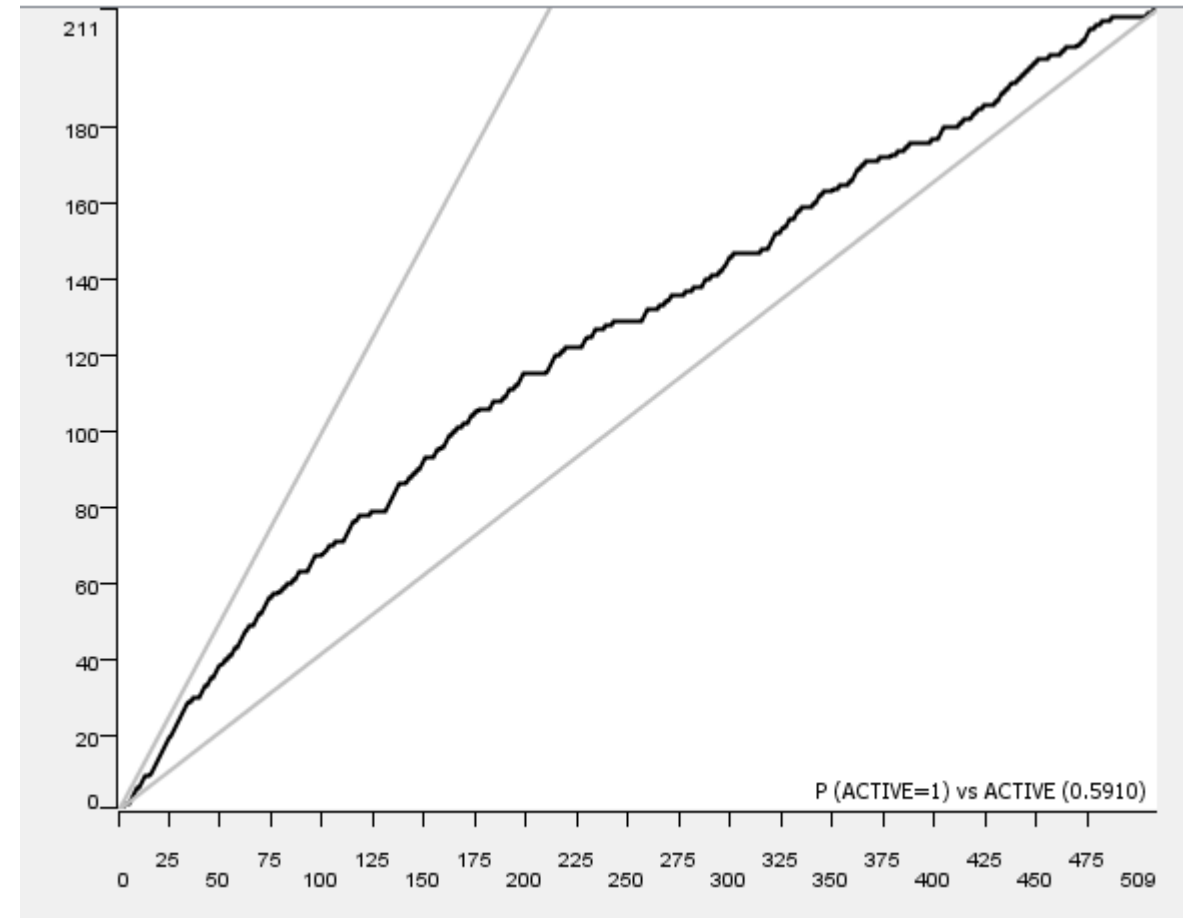

|          | Predicted Active | Predicted Inactive |
|----------|------------------|--------------------|
| Active   | 120              | 91                 |
| Inactive | 96               | 202                |

PNN - <15nM DefGood in HIV Protease, 25% error; Random seed = 1515533876005  
(reparameterized Theta minus = 0.55; theta plus = 0.75)

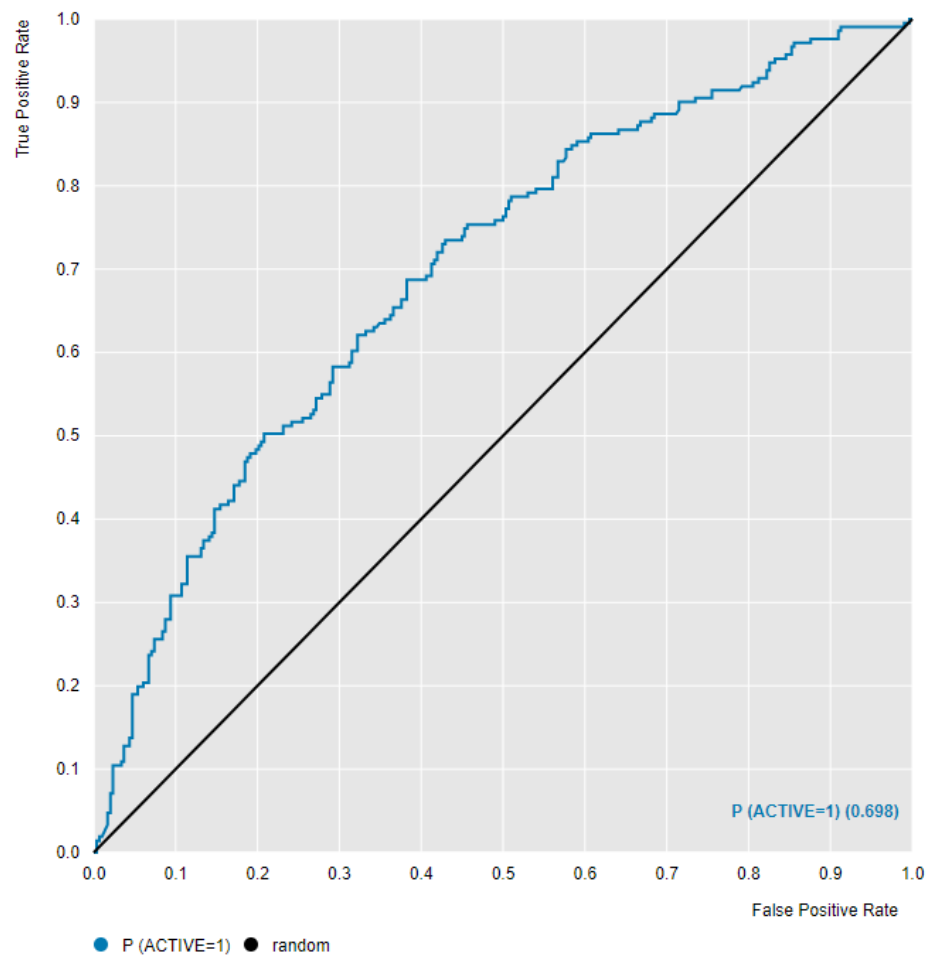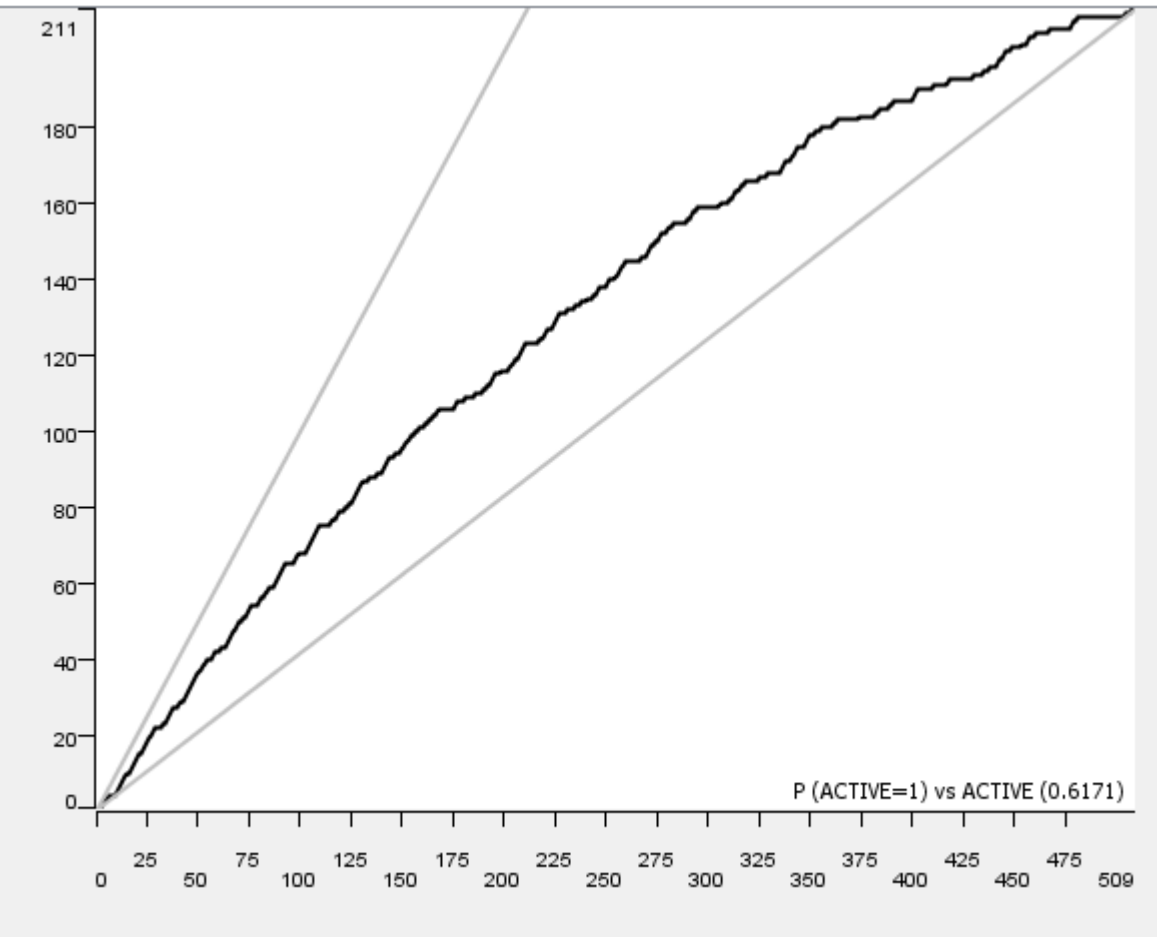

N=509

|                      |        |
|----------------------|--------|
| Top 10% Mean<br>IC50 | 150 nM |
|----------------------|--------|

|          | Predicted Active | Predicted Inactive |
|----------|------------------|--------------------|
| Active   | 84               | 127                |
| Inactive | 44               | 254                |

# PNN- <15nM DefGood in HIV Protease, 10% error; Random seed = 429

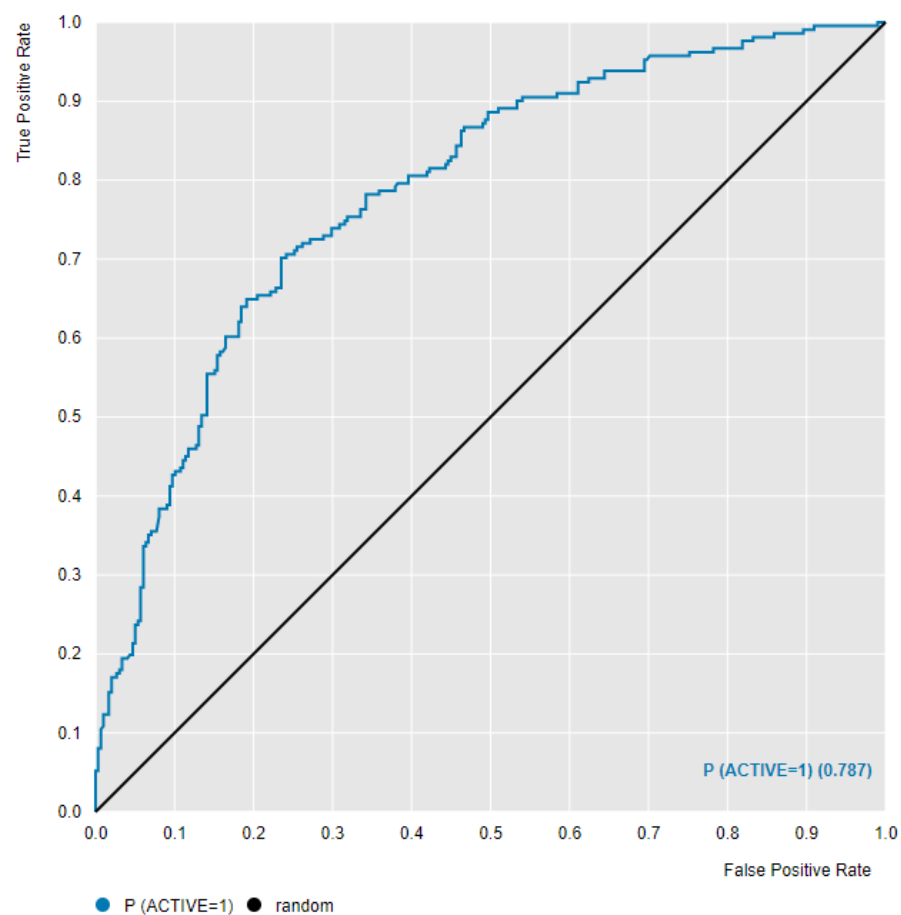

N=509

| Top 10% Mean IC50 | 251 nM |
|-------------------|--------|
|-------------------|--------|

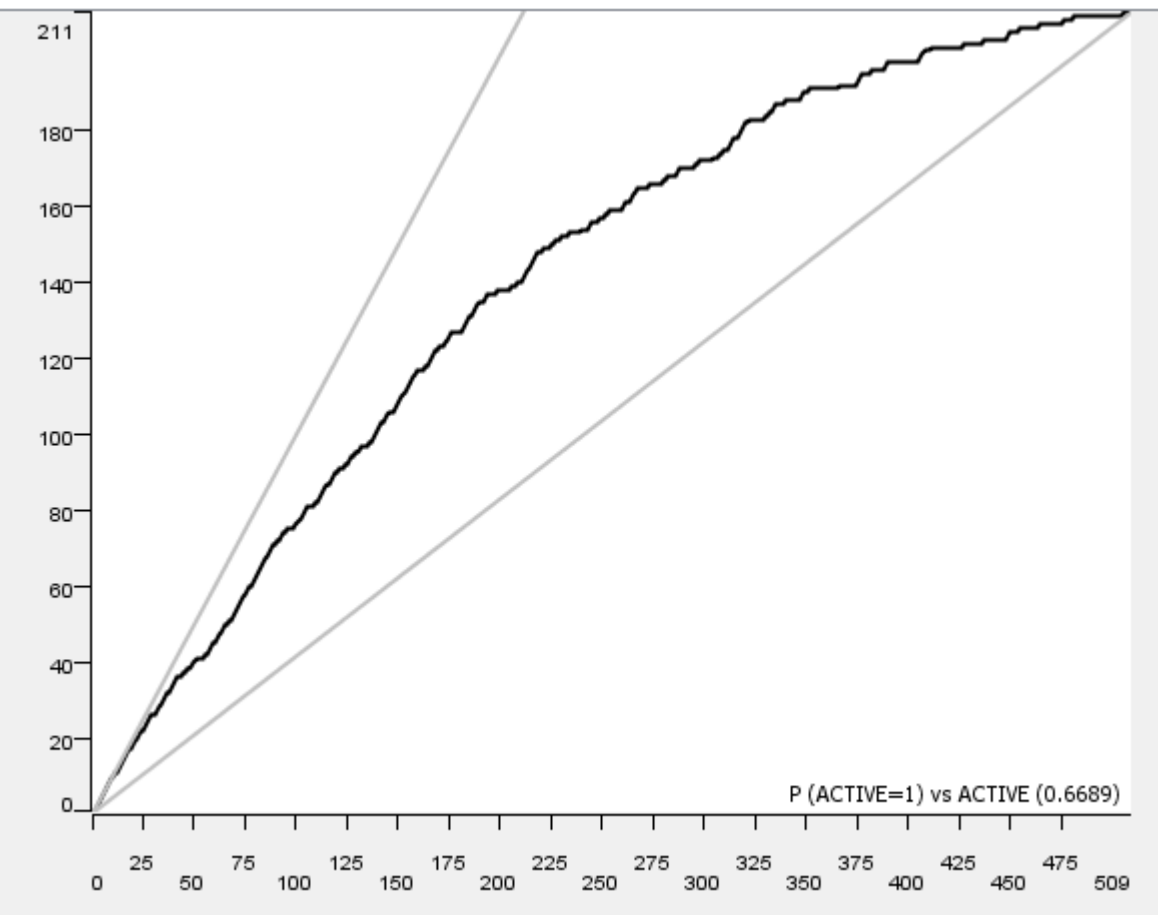

|          | Predicted Active | Predicted Inactive |
|----------|------------------|--------------------|
| Active   | 123              | 88                 |
| Inactive | 48               | 250                |



# PNN- <15nM DefGood in HIV Protease, 15% error; Random seed = 429

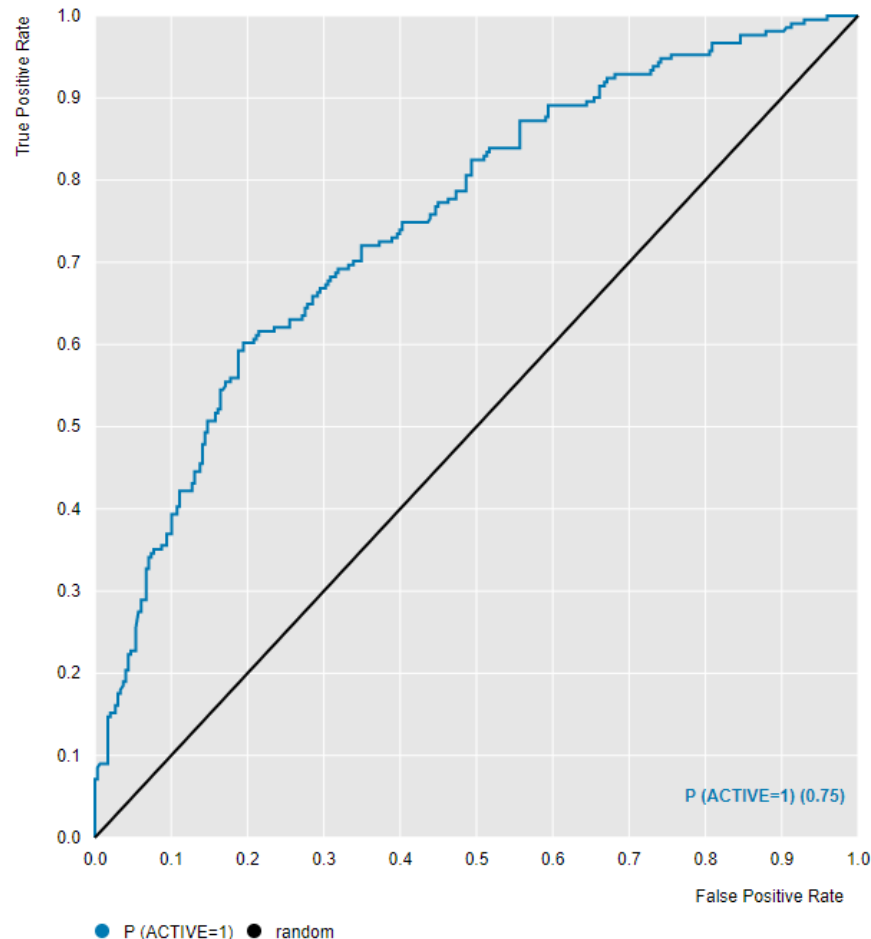

N=509

|                   |                                   |
|-------------------|-----------------------------------|
| Top 10% Mean IC50 | 756 nM<br>(2 >10,000 nM mistakes) |
|-------------------|-----------------------------------|

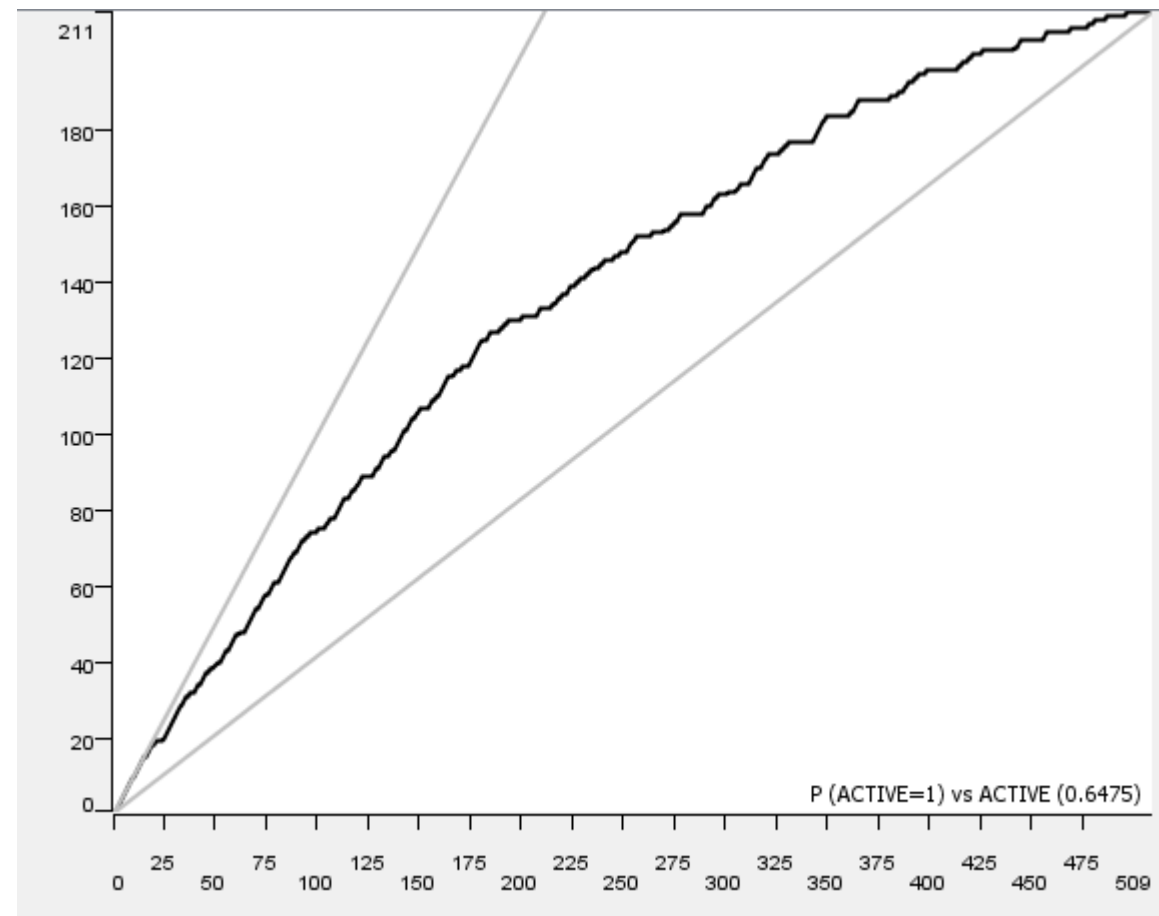

|          | Predicted Active | Predicted Inactive |
|----------|------------------|--------------------|
| Active   | 109              | 102                |
| Inactive | 48               | 250                |

# PNN- <15nM DefGood in HIV Protease, 10% error; Random seed = 12178

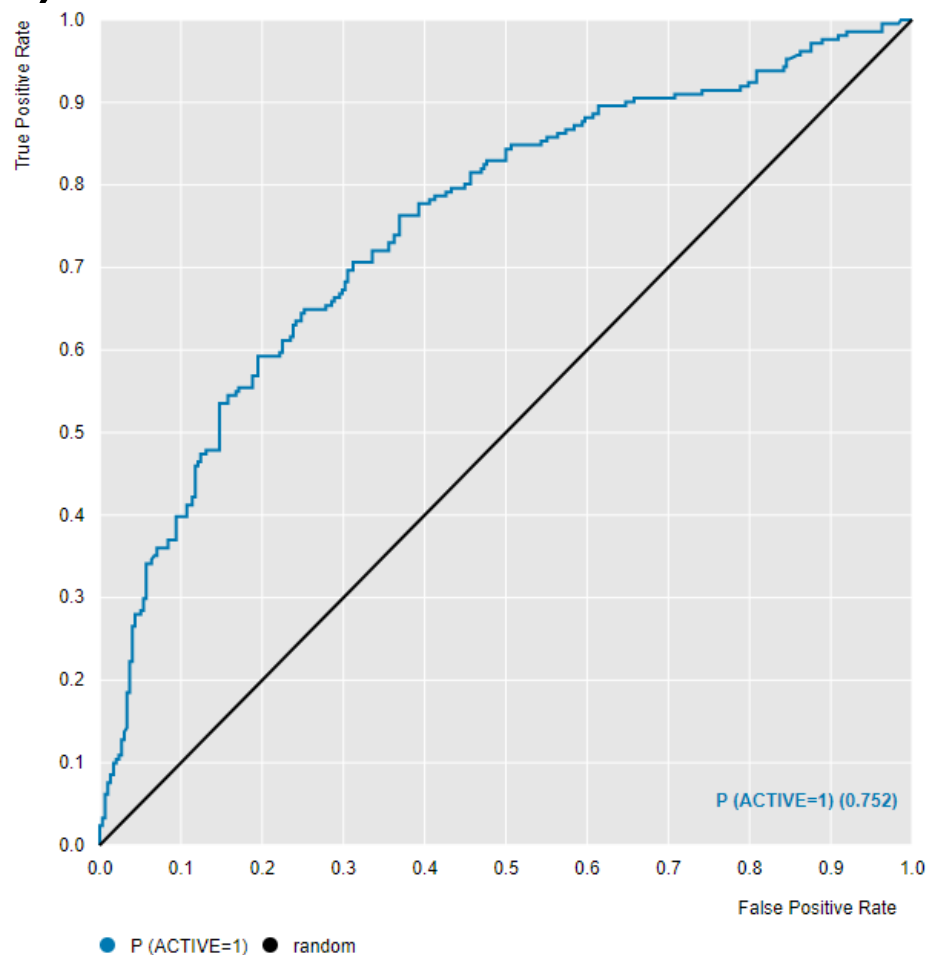

N=509

| Top 10% Mean IC50 | 269 nM |
|-------------------|--------|
|-------------------|--------|

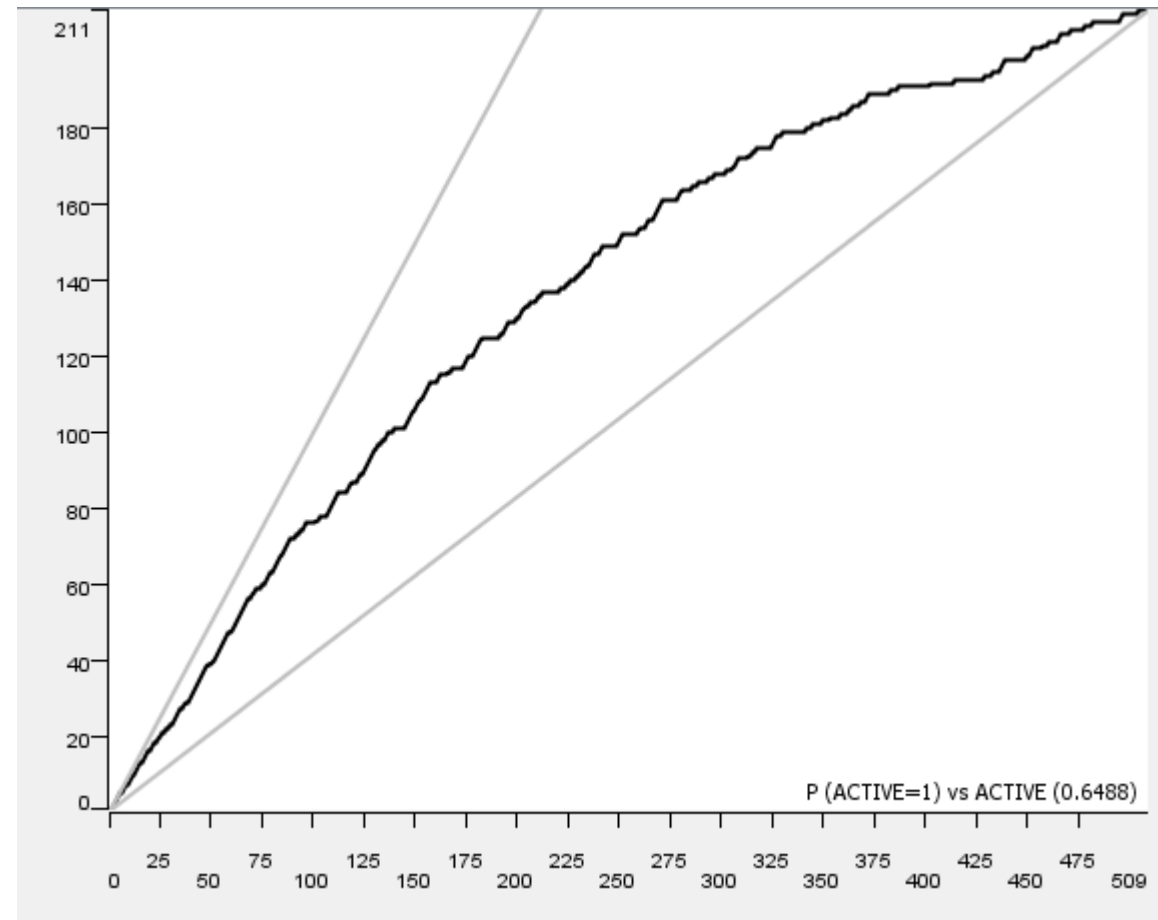

|          | Predicted Active | Predicted Inactive |
|----------|------------------|--------------------|
| Active   | 104              | 107                |
| Inactive | 44               | 254                |

# PNN- <15nM DefGood in HIV Protease, 20% error; Random seed = 12178

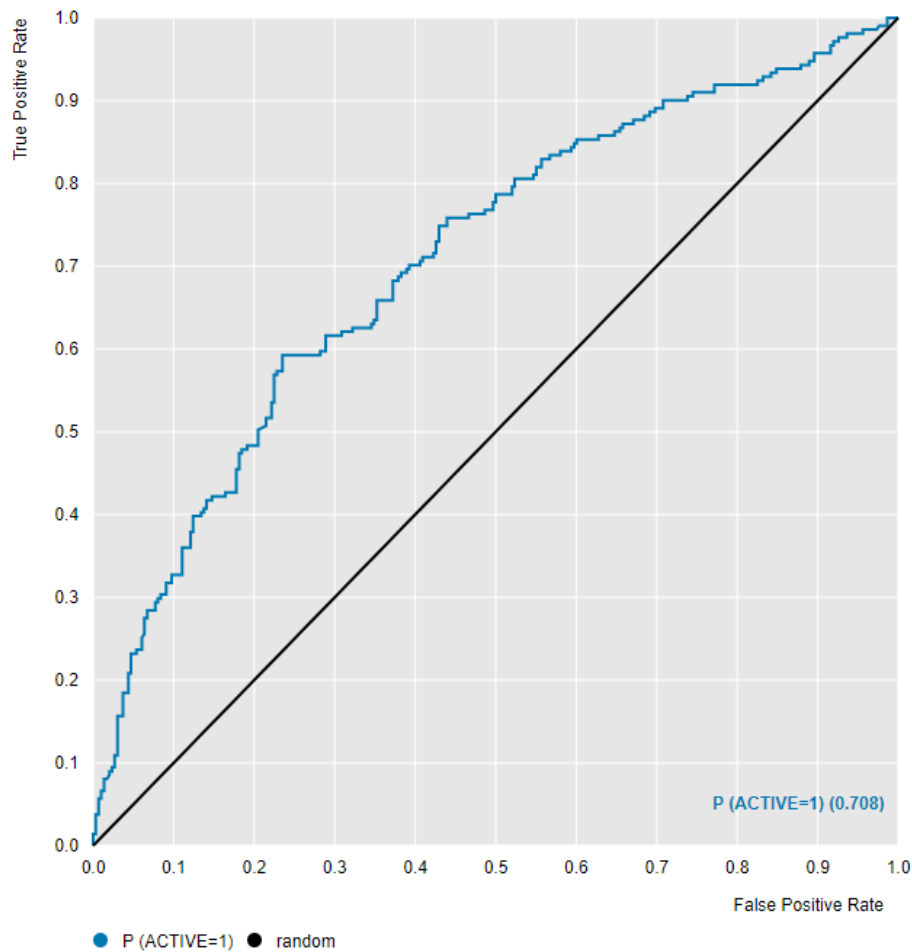

N=509

| Top 10% Mean IC50 | 267 nM |
|-------------------|--------|
|-------------------|--------|

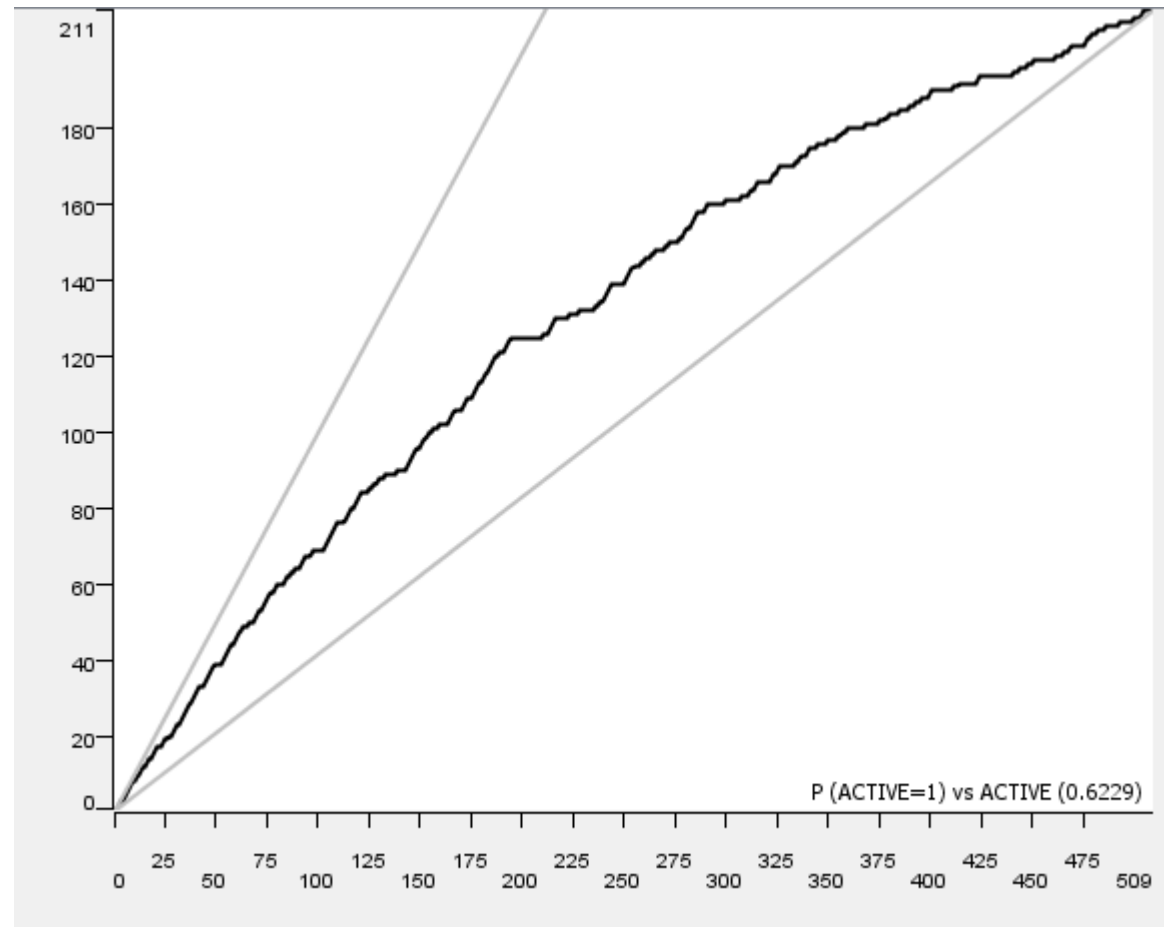

|          | Predicted Active | Predicted Inactive |
|----------|------------------|--------------------|
| Active   | 93               | 118                |
| Inactive | 53               | 245                |

# PNN- <15nM DefGood in HIV Protease, 25% error; Random seed = 12178

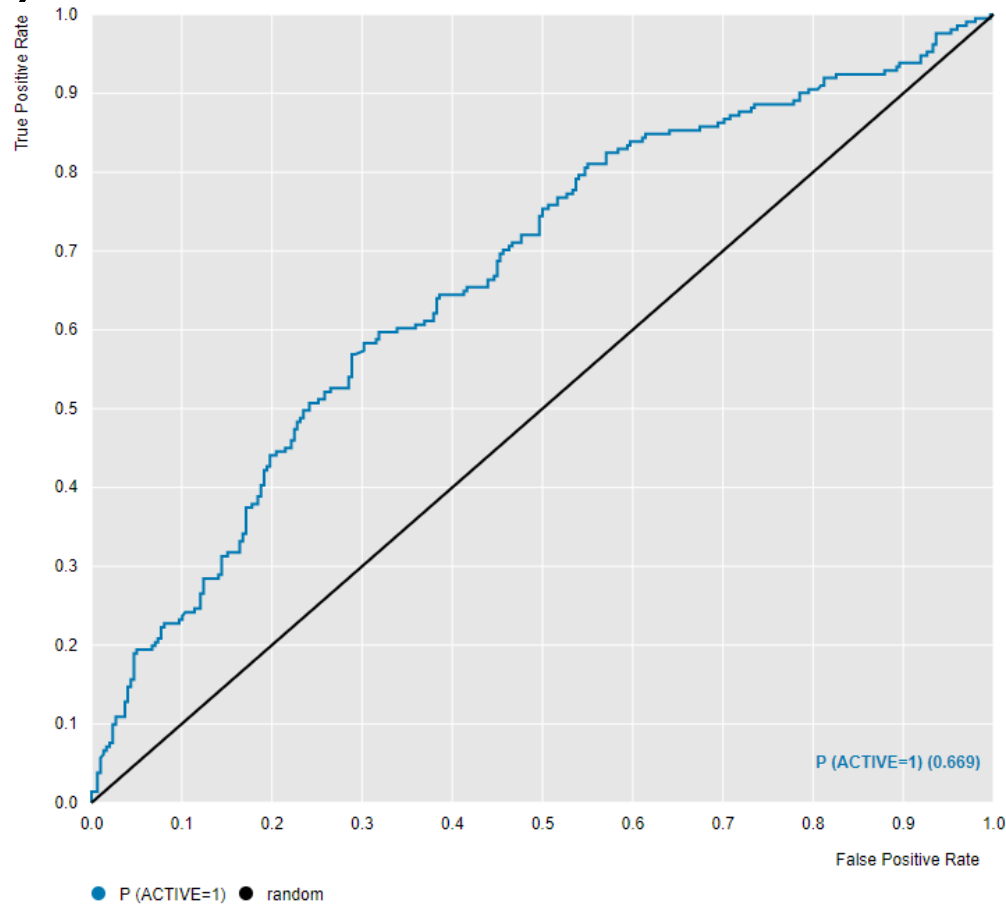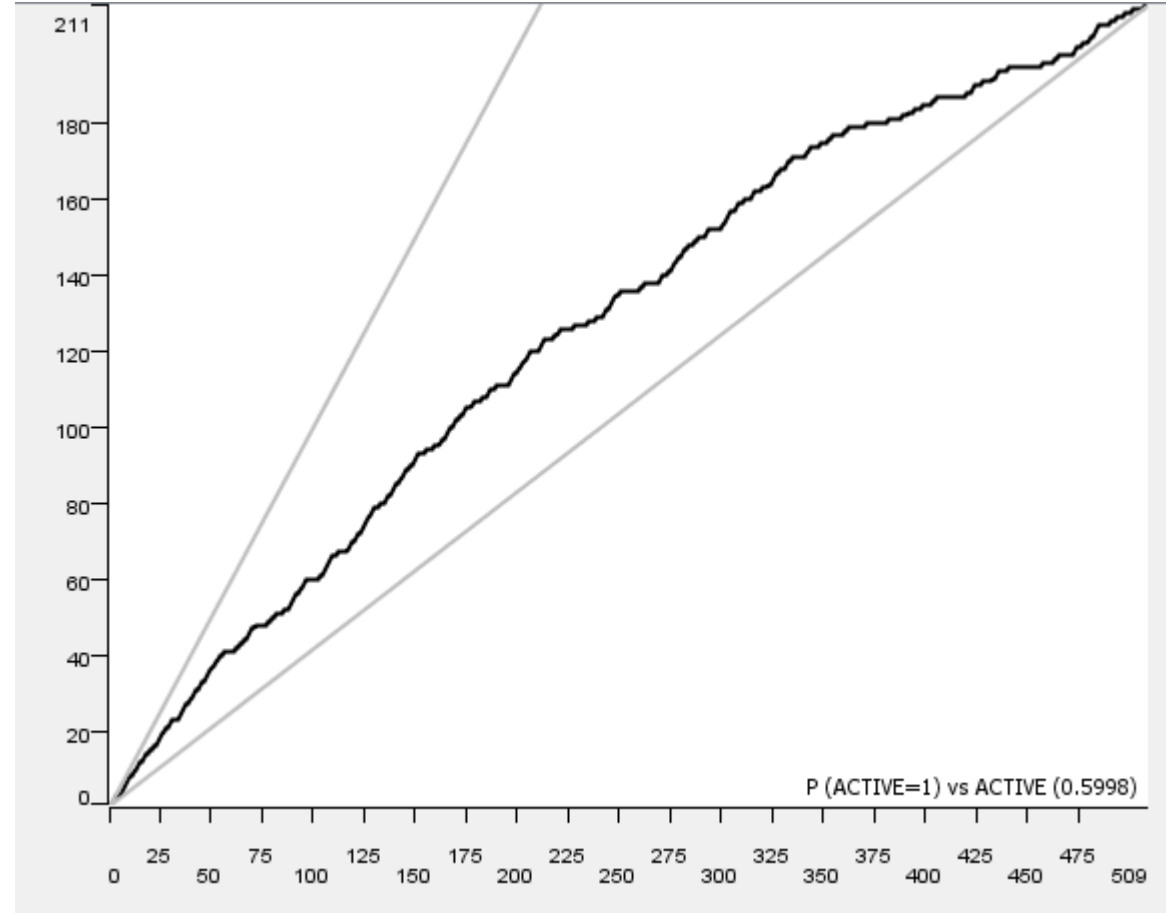

N=509

| Top 10% Mean IC50 | 498 nM |
|-------------------|--------|
|-------------------|--------|

|          | Predicted Active | Predicted Inactive |
|----------|------------------|--------------------|
| Active   | 109              | 102                |
| Inactive | 77               | 221                |

PNN - <15nM DefGood in HIV Protease, 25% error; Random seed = 12178  
(reparameterized Theta minus = 0.05; theta plus = 0.25)

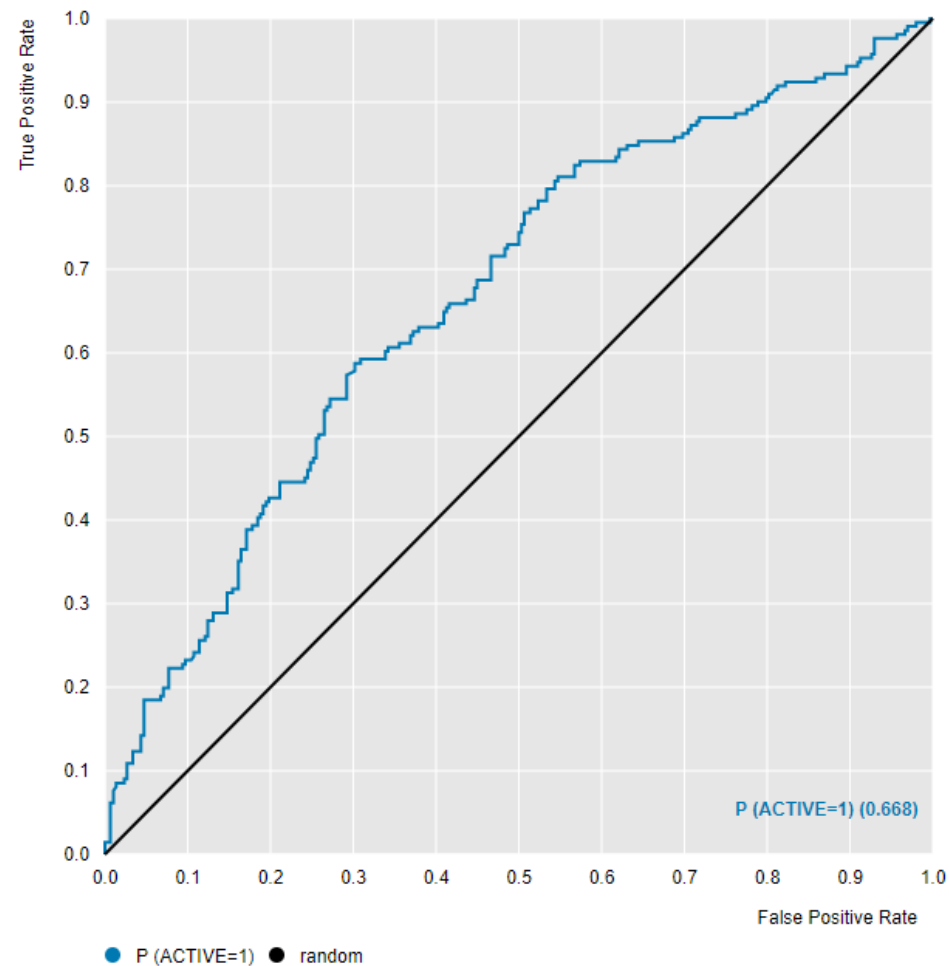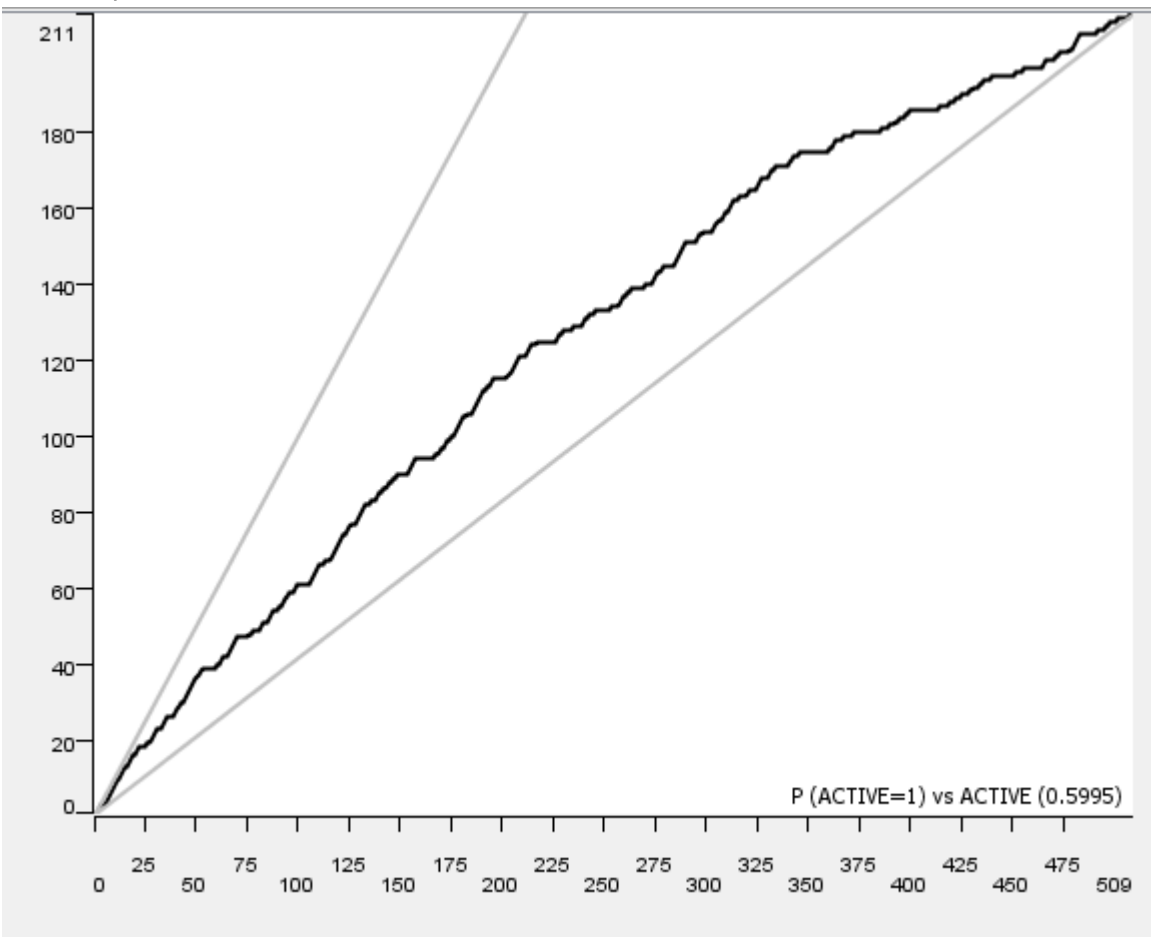

N=509

|                   |        |
|-------------------|--------|
| Top 10% Mean IC50 | 498 nM |
|-------------------|--------|

|          | Predicted Active | Predicted Inactive |
|----------|------------------|--------------------|
| Active   | 110              | 101                |
| Inactive | 79               | 210                |

# Conclusion - PNN

- Across three random seeds, the % error that lead to a significant enrichment failure and/or top 10% IC50 increase in the retrospective test was 25%, 15% and 25% for each unique random seed.
- Parameterization did not alter the failure point for each random split evaluated
- Split 121783 had a significant mistake (>100,000) even in the 0% error set. Used 12178 as the random seed

JAK2

# JAK2 NBN Design

- Rules -  $\$RELATION\$ = "="$  OR  $\$IC50\$ > 999$  OR  $\$IC50\$ < 10 \Rightarrow TRUE$
- Sort ascending and remove duplicates
- DefGood scanned between 5 and 25 nM
- 80-20 split for both actives and inactives
- NBN – ECFP4 used Classifier where Prediction was Active = True
- V617F mutant data was removed from the dataset as we were only interested in WT JAK2
- Resulted in 3624 compounds after cleaning the data



# <5 nM DefGood in JAK2

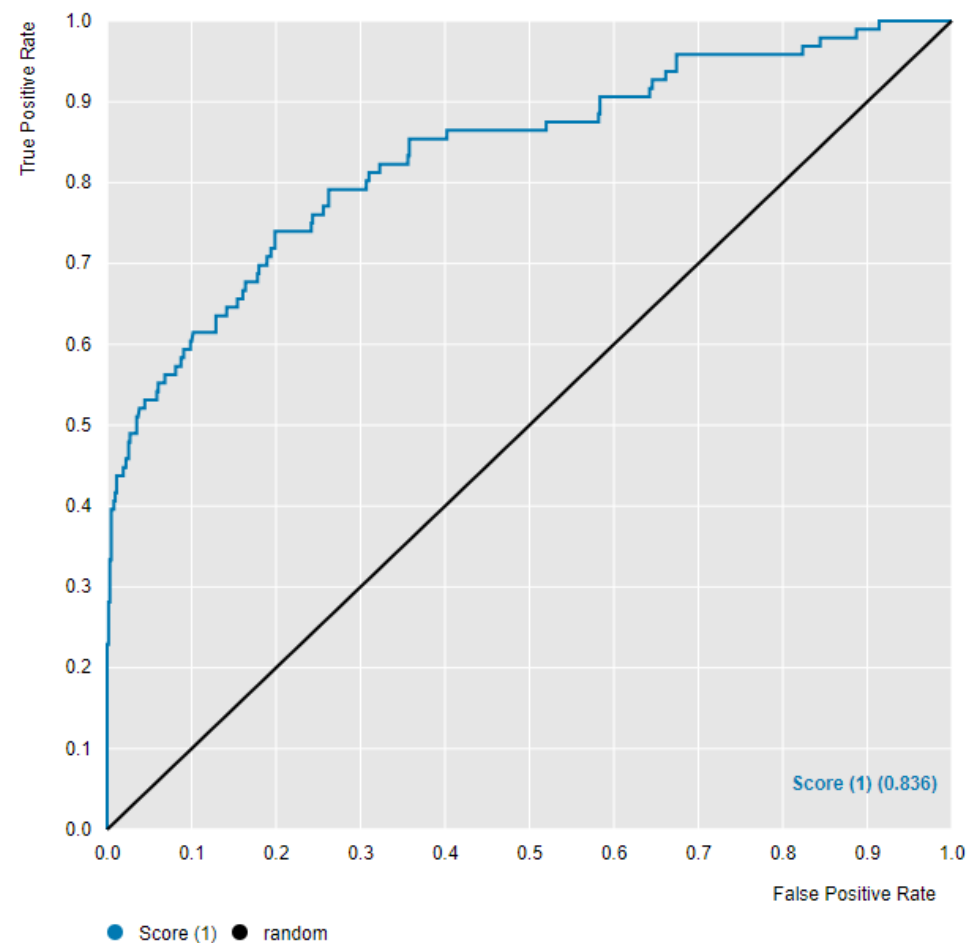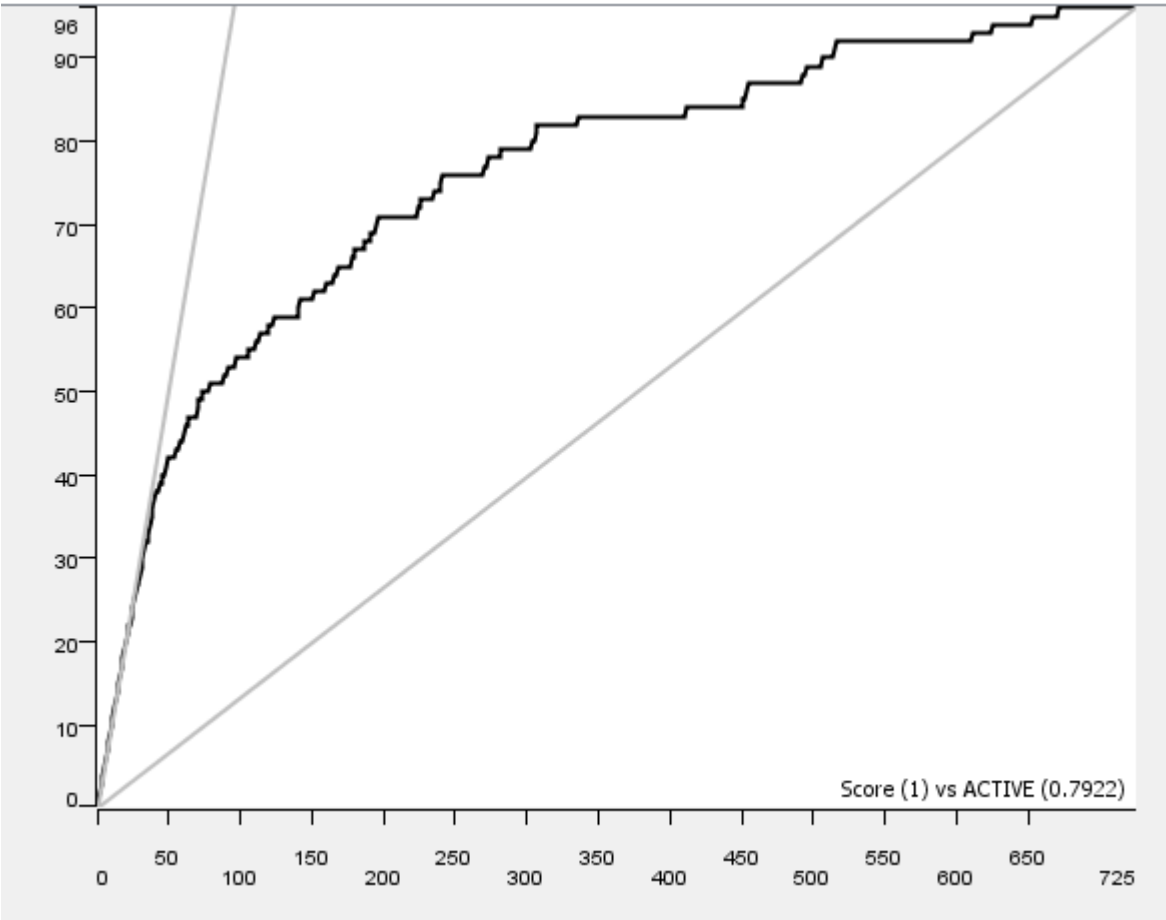

N=725

| Top 10% Mean IC50 | 175 nM |
|-------------------|--------|
|-------------------|--------|

|          | Predicted Active | Predicted Inactive |
|----------|------------------|--------------------|
| Active   | 67               | 29                 |
| Inactive | 119              | 510                |

# <10 nM DefGood in JAK2

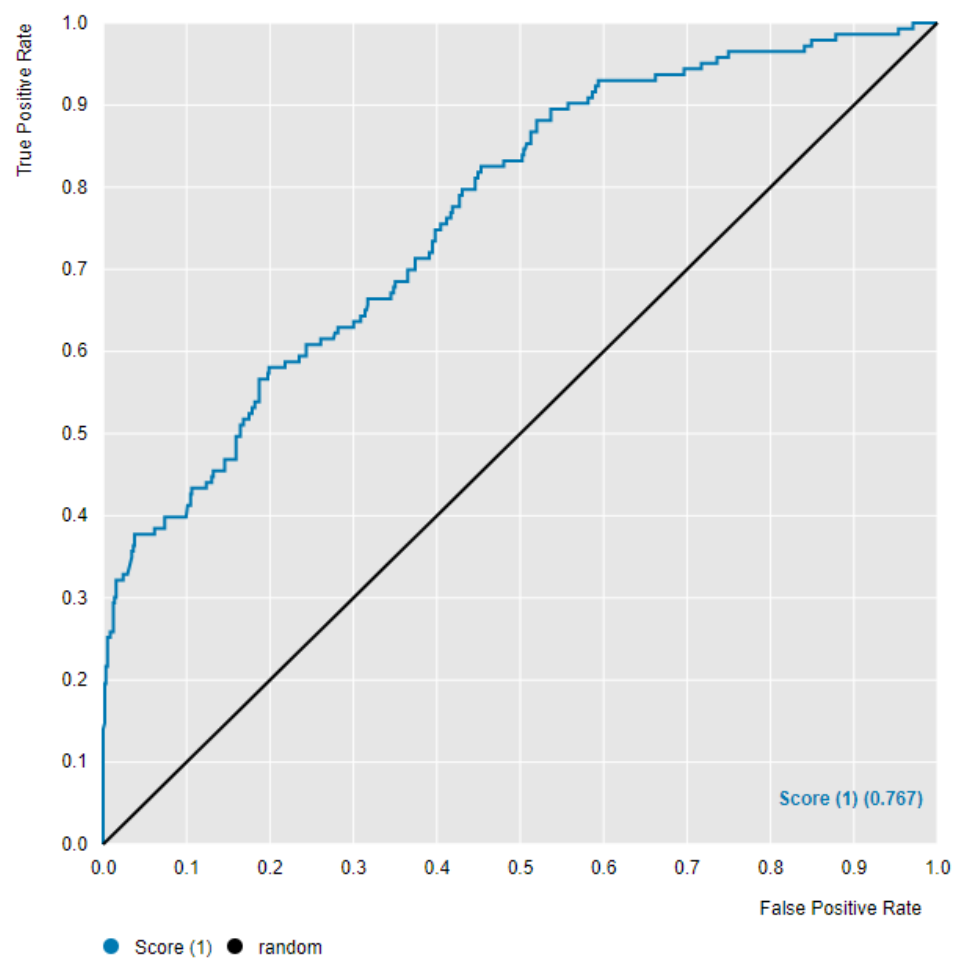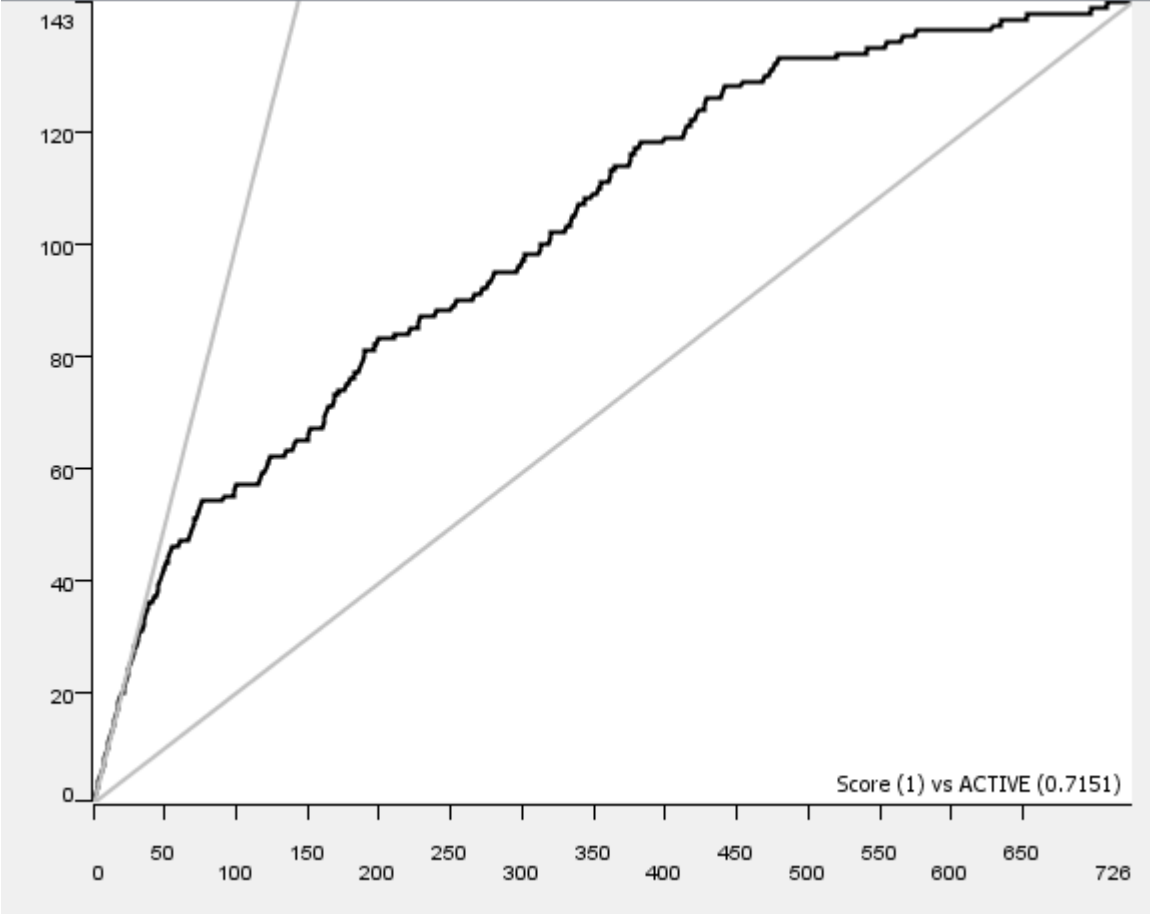

N=726

| Top 10% Mean<br>IC50 | 309 nM |
|----------------------|--------|
|----------------------|--------|

|          | Predicted Active | Predicted Inactive |
|----------|------------------|--------------------|
| Active   | 97               | 46                 |
| Inactive | 203              | 380                |

# <15 nM DefGood in JAK2

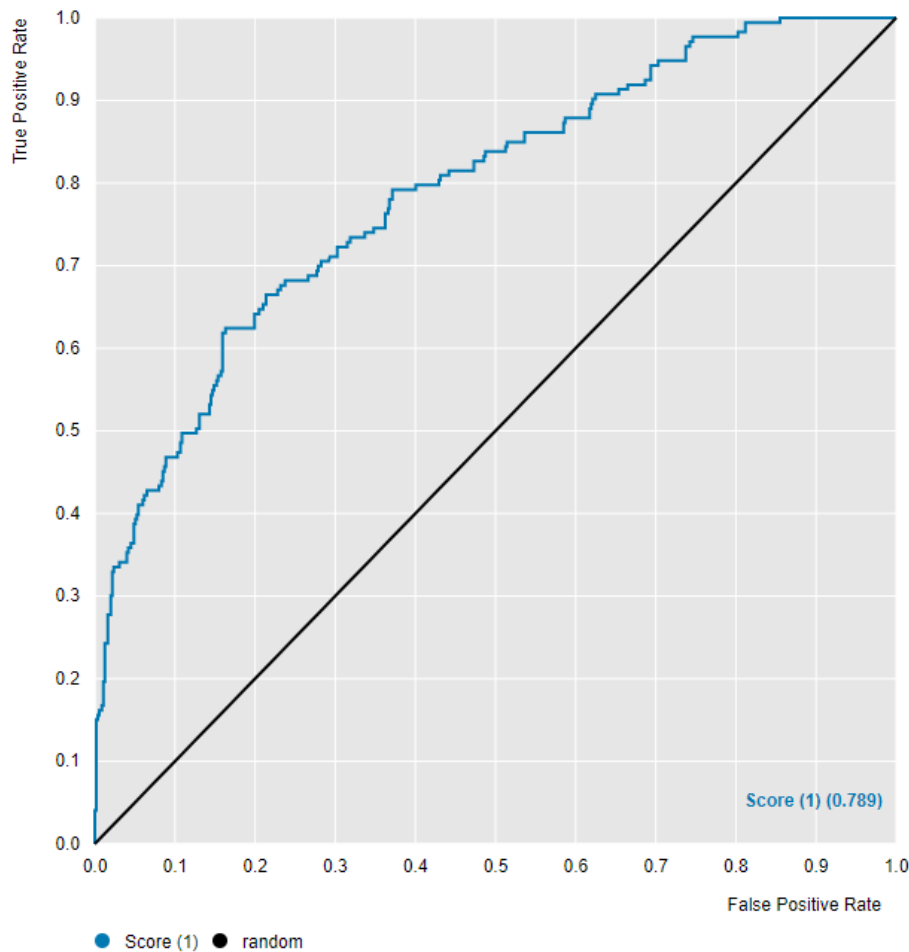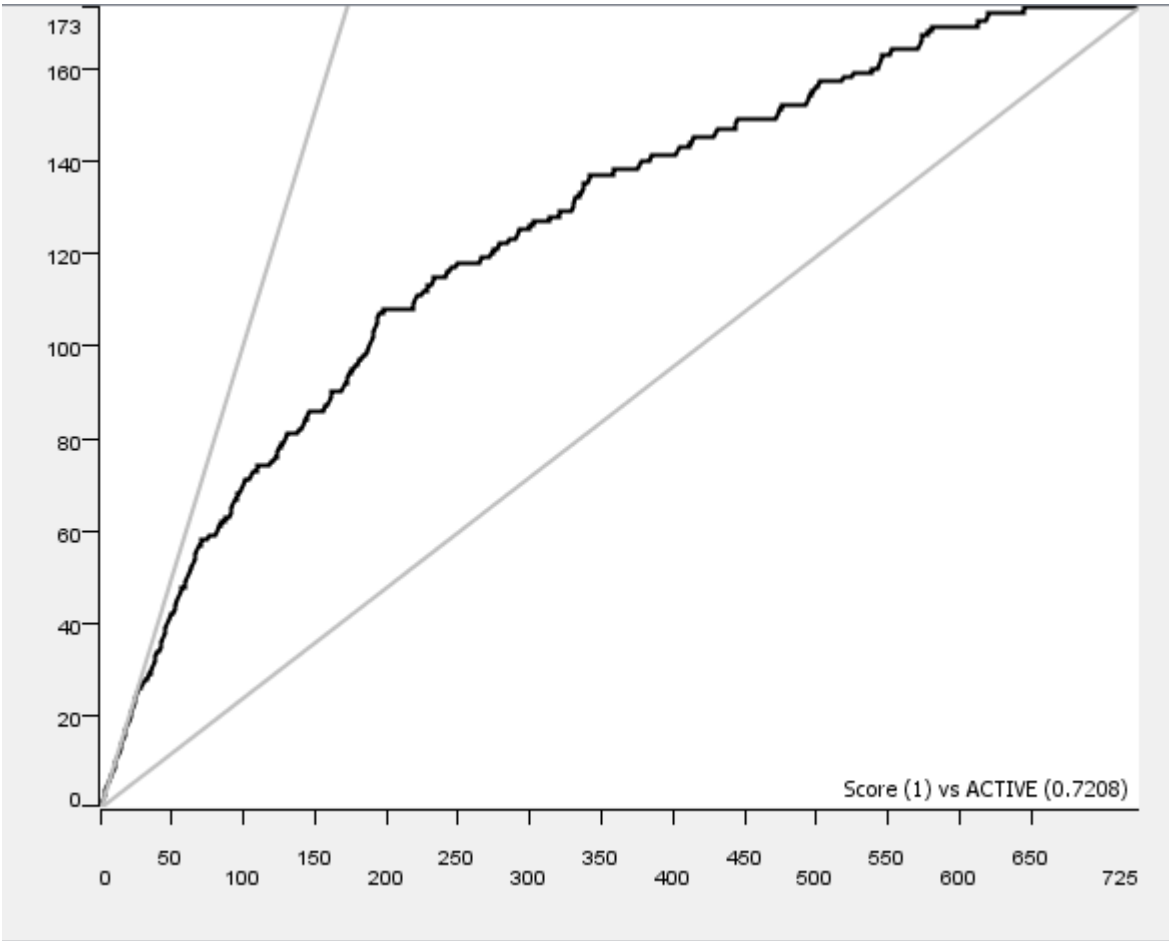

N=725

|                      |         |
|----------------------|---------|
| Top 10% Mean<br>IC50 | 38.3 nM |
|----------------------|---------|

|          | Predicted Active | Predicted Inactive |
|----------|------------------|--------------------|
| Active   | 110              | 63                 |
| Inactive | 110              | 442                |

# <20 nM DefGood in JAK2

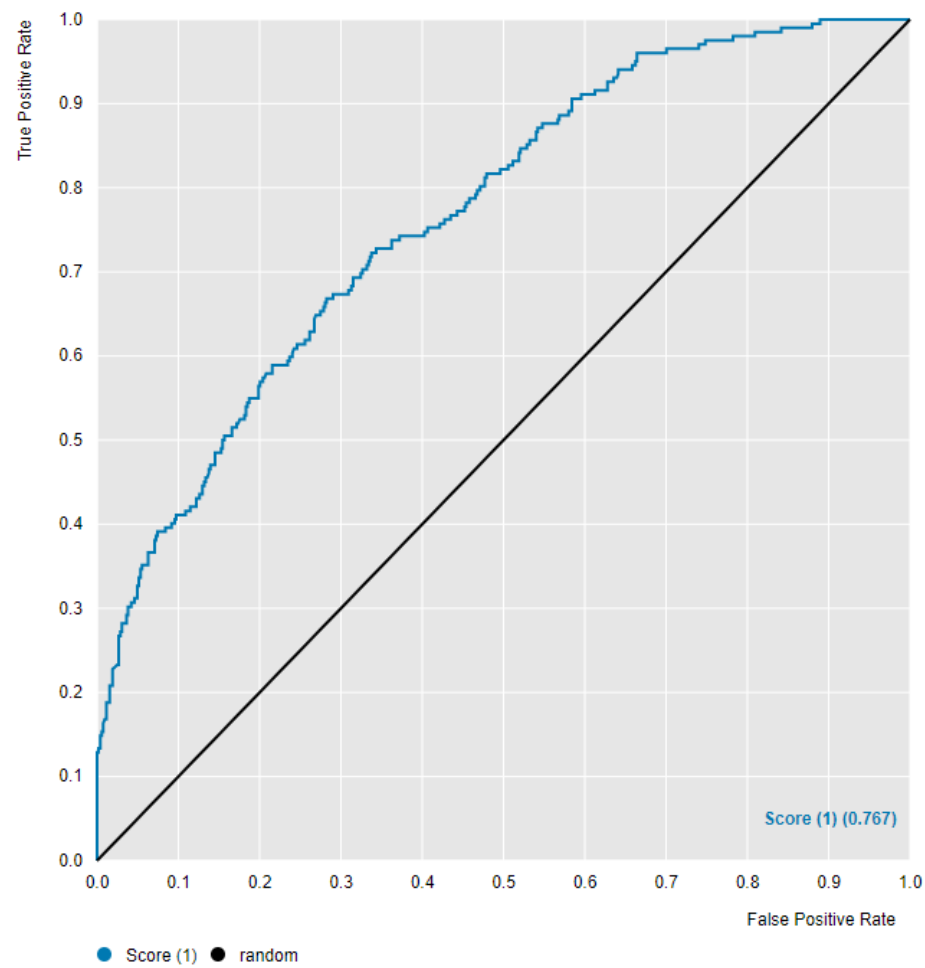

N=726

|                      |         |
|----------------------|---------|
| Top 10% Mean<br>IC50 | 32.6 nM |
|----------------------|---------|

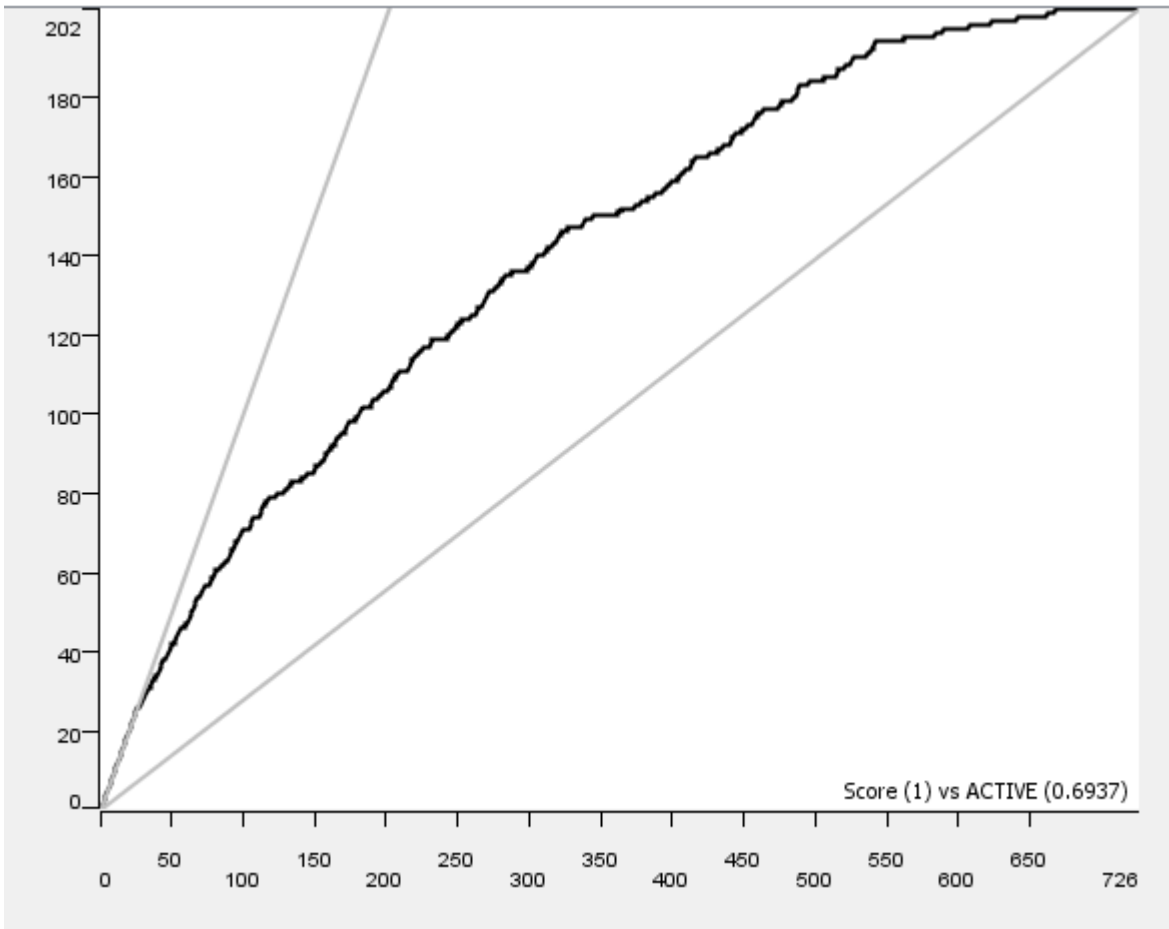

|          | Predicted Active | Predicted Inactive |
|----------|------------------|--------------------|
| Active   | 117              | 85                 |
| Inactive | 110              | 414                |

# <25 nM DefGood in JAK2

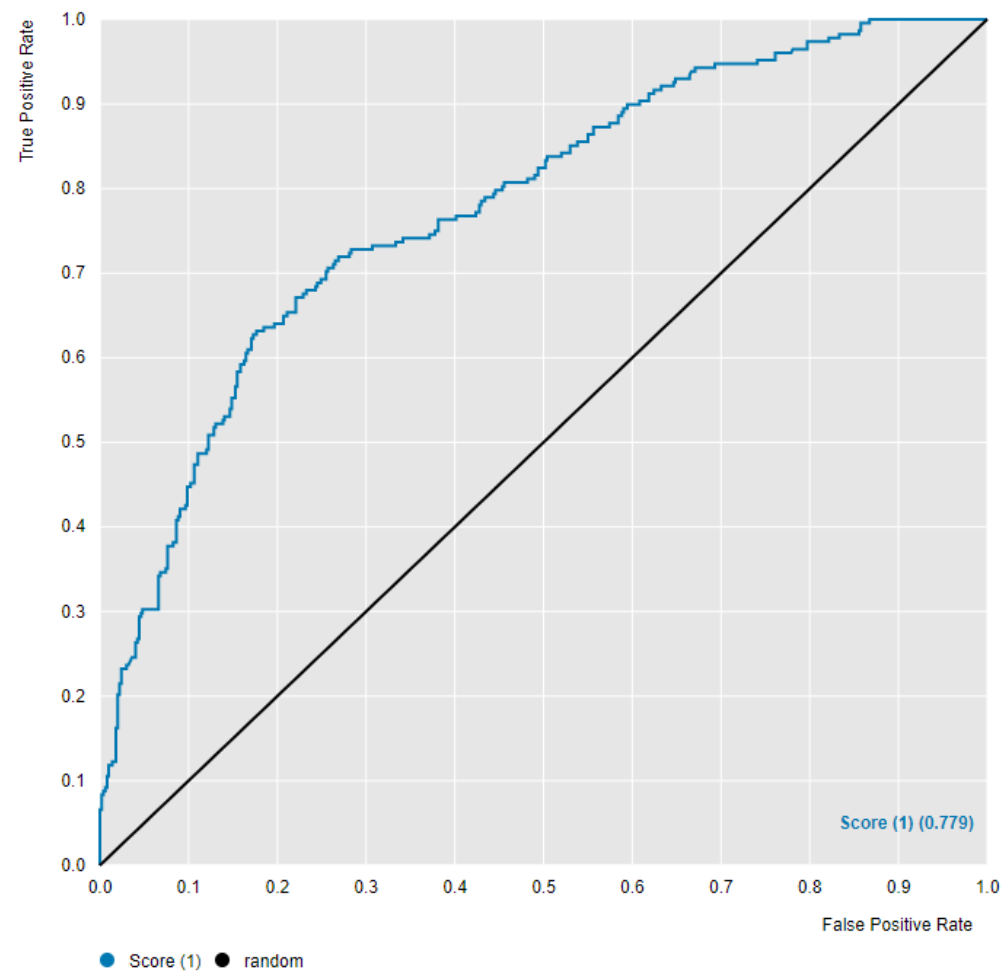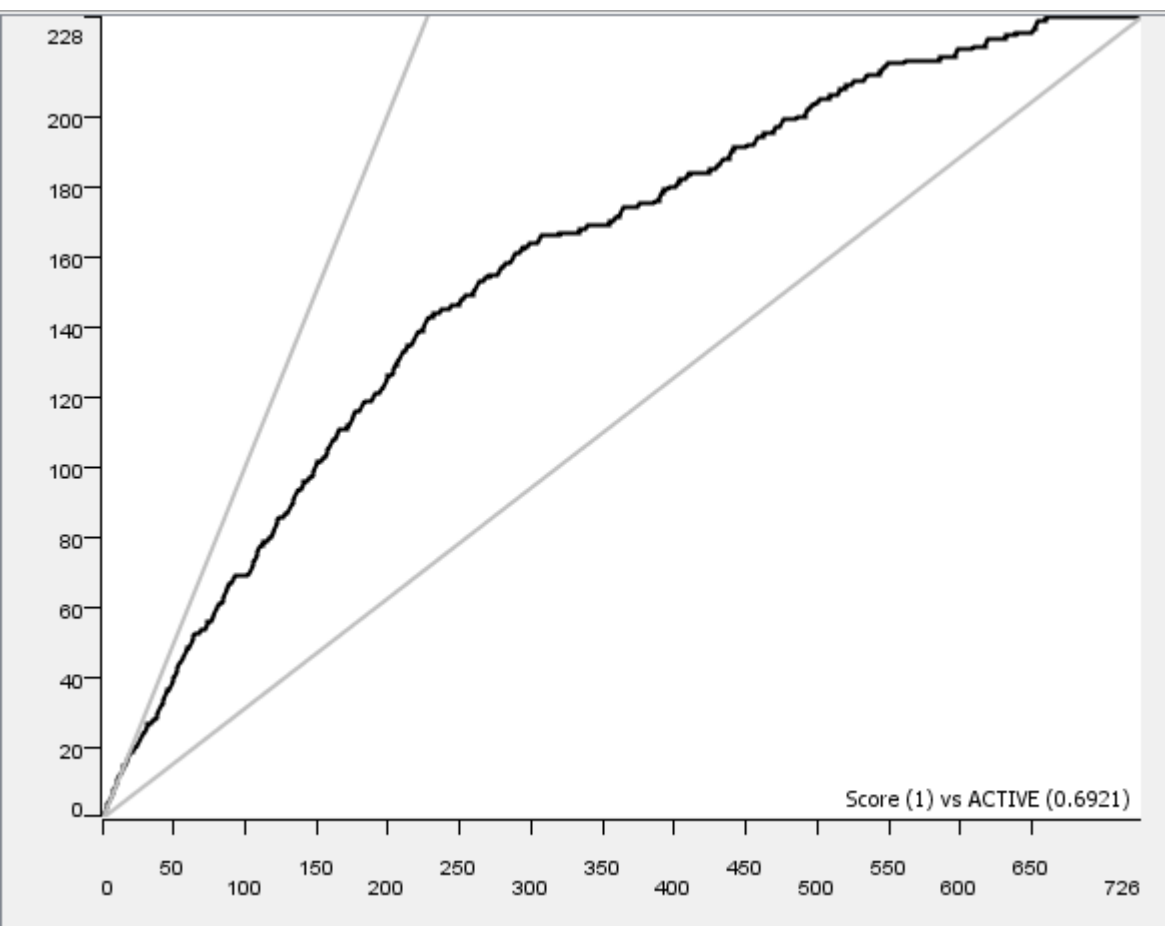

N=726

| Top 10% Mean IC50 | 37.4 nM |
|-------------------|---------|
|-------------------|---------|

|          | Predicted Active | Predicted Inactive |
|----------|------------------|--------------------|
| Active   | 161              | 67                 |
| Inactive | 129              | 369                |

# Decision on DefGood

- <15 nM has the best performance with regard to enrichment, ROC mean top 10% IC50. The <5 definition of good had excellent enrichment and a better ROC, but when mistakes were made by the algorithm, they were severe.

# RF - <15 nM DefGood in JAK2

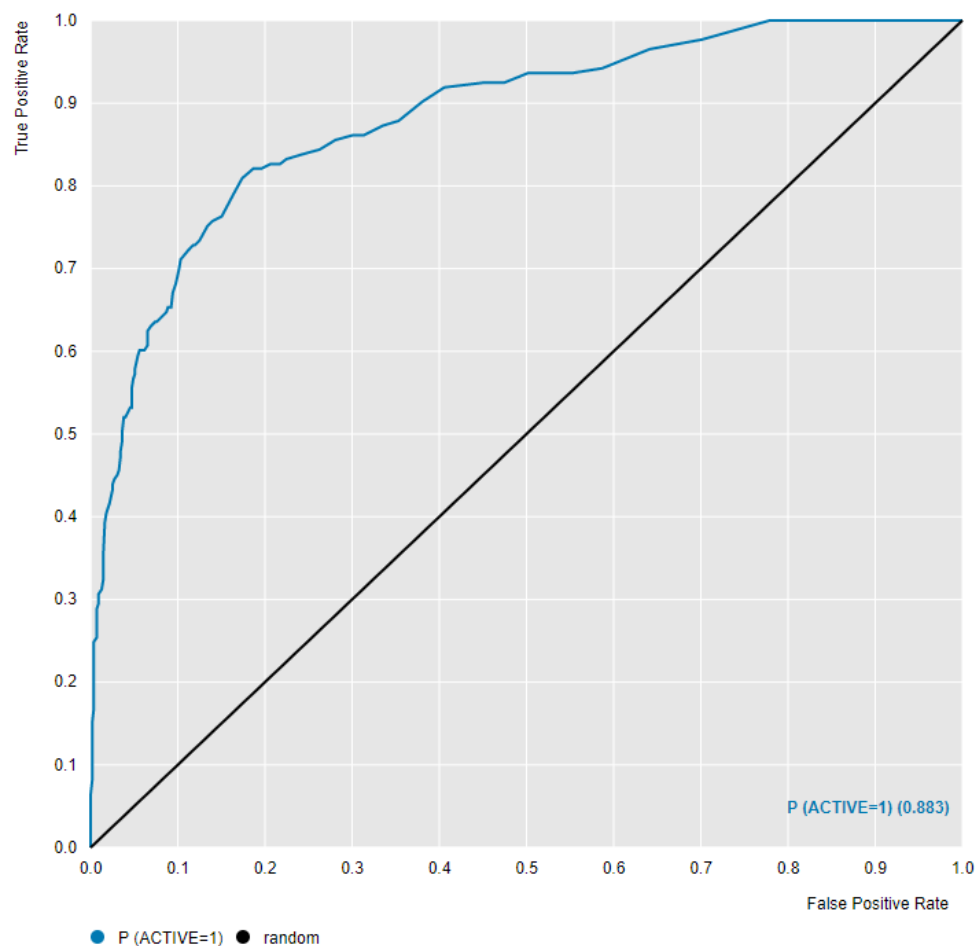

N=725

| Top 10% Mean IC50 | 26.4 nM |
|-------------------|---------|
|-------------------|---------|

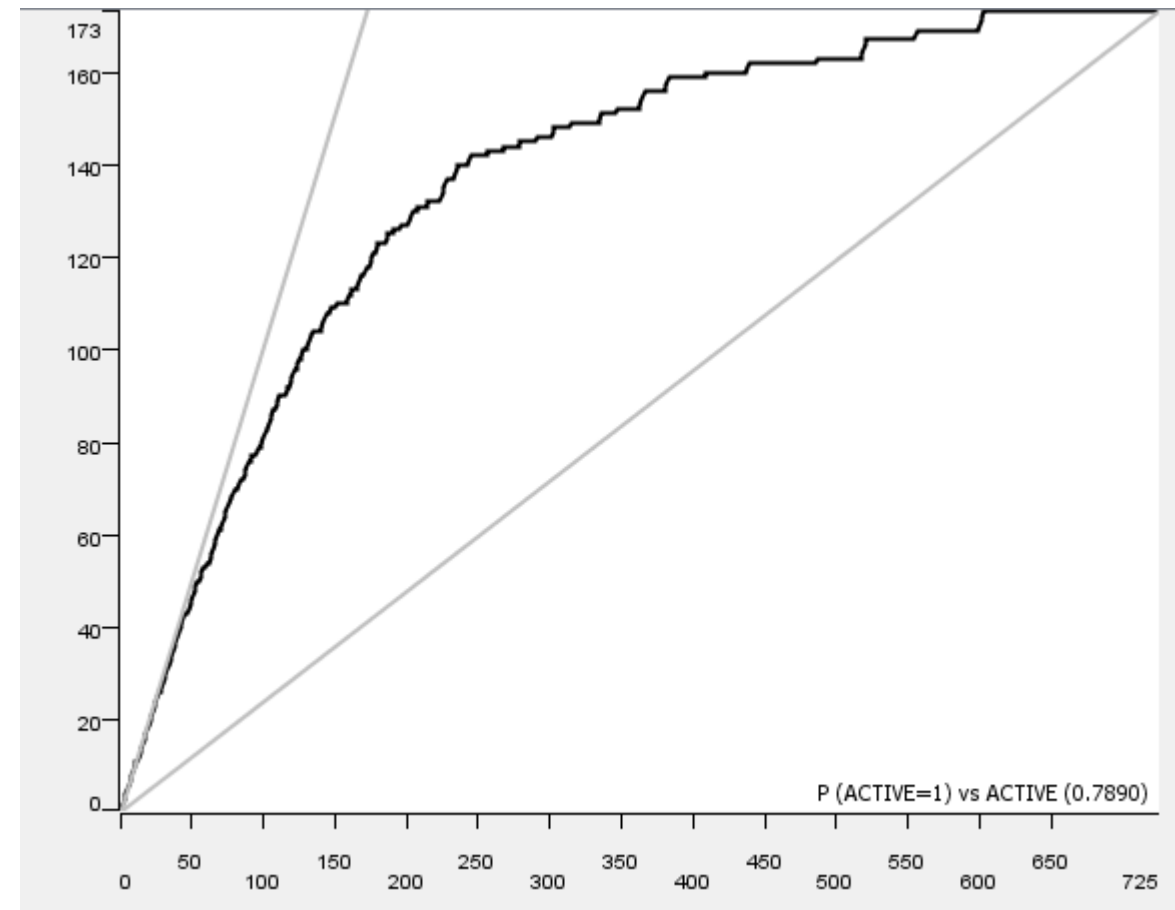

|          | Predicted Active | Predicted Inactive |
|----------|------------------|--------------------|
| Active   | 99               | 74                 |
| Inactive | 28               | 524                |

# Decision on DefGood - RF

- Work in ALK showed DefGood in the NBN was similar to DefGood in an RF. Therefore, this value for DefGood from the NBN design was used as DefGood.



# PNN - <5 nM DefGood in JAK2

- Properties List (46 calculatable properties were used)
- Parameterization (Global Accuracy for Activity at a 5 nM decision value was used, and a 5-fold stratified sampling cross validation was used to parameterize theta minus and theta plus) Theta Minus = 0.95 and Theta Plus = 0.95

# PNN - <5 nM DefGood in JAK2 (0.95, 0.95)

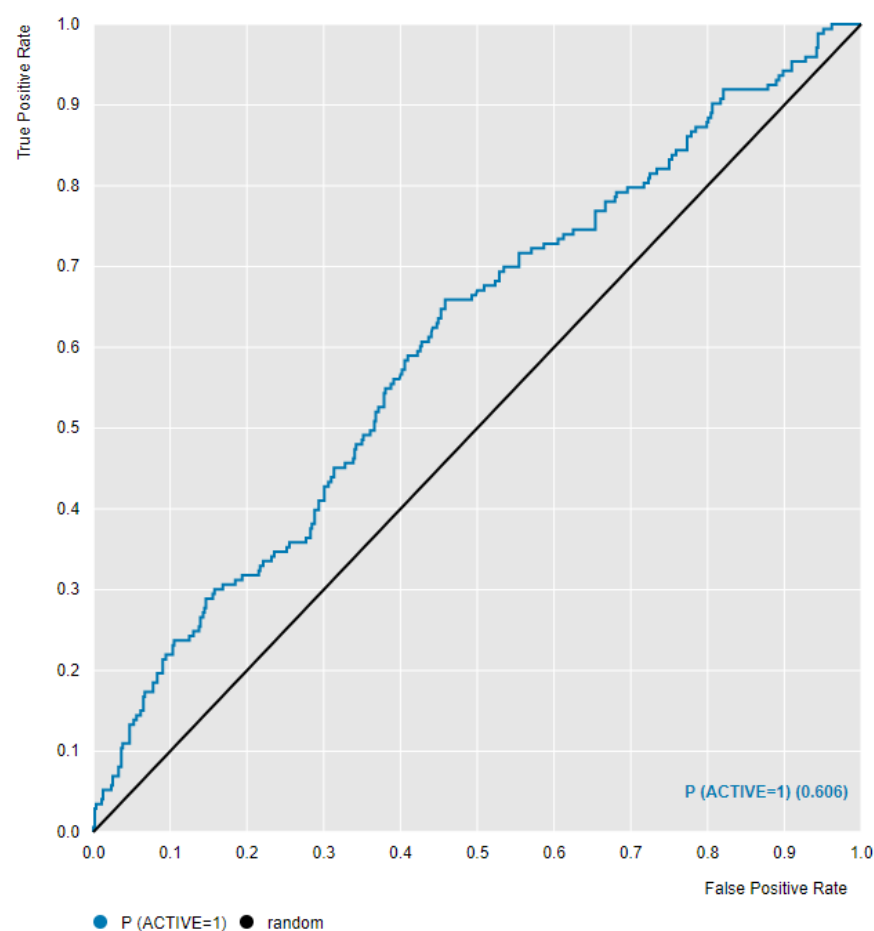

N=725

| Top 10% Mean IC50 | 3,600 nM |
|-------------------|----------|
|-------------------|----------|

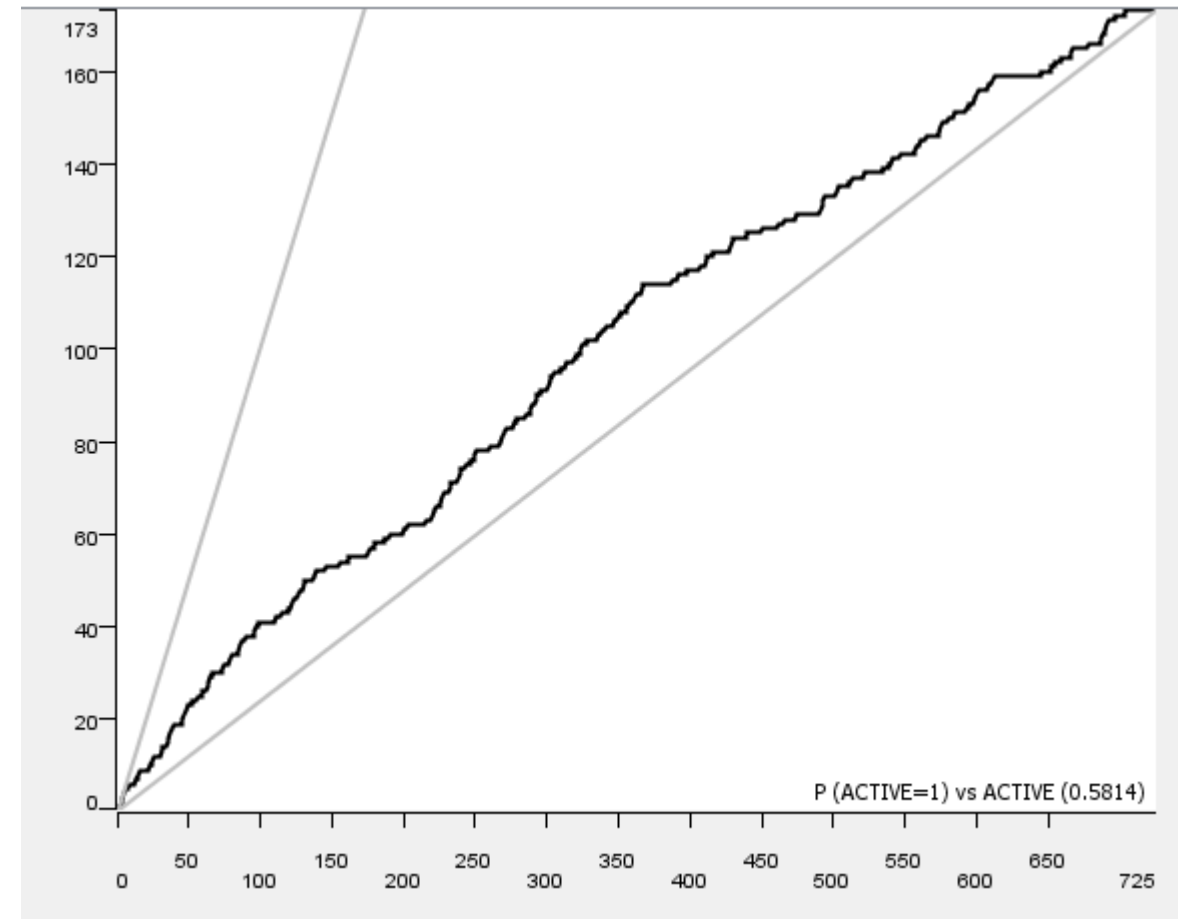

|          | Predicted Active | Predicted Inactive |
|----------|------------------|--------------------|
| Active   | 0                | 173                |
| Inactive | 0                | 552                |

# Decision on DefGood - PNN

- Parameterization failed to generate theta values that were useful in parameterizing the PNN.

# NBN Error Tolerance- <15 nM DefGood in JAK2

- 0-50% absolute error

<15 nM DefGood in JAK2, 5% error; Random seed = 1515533876005

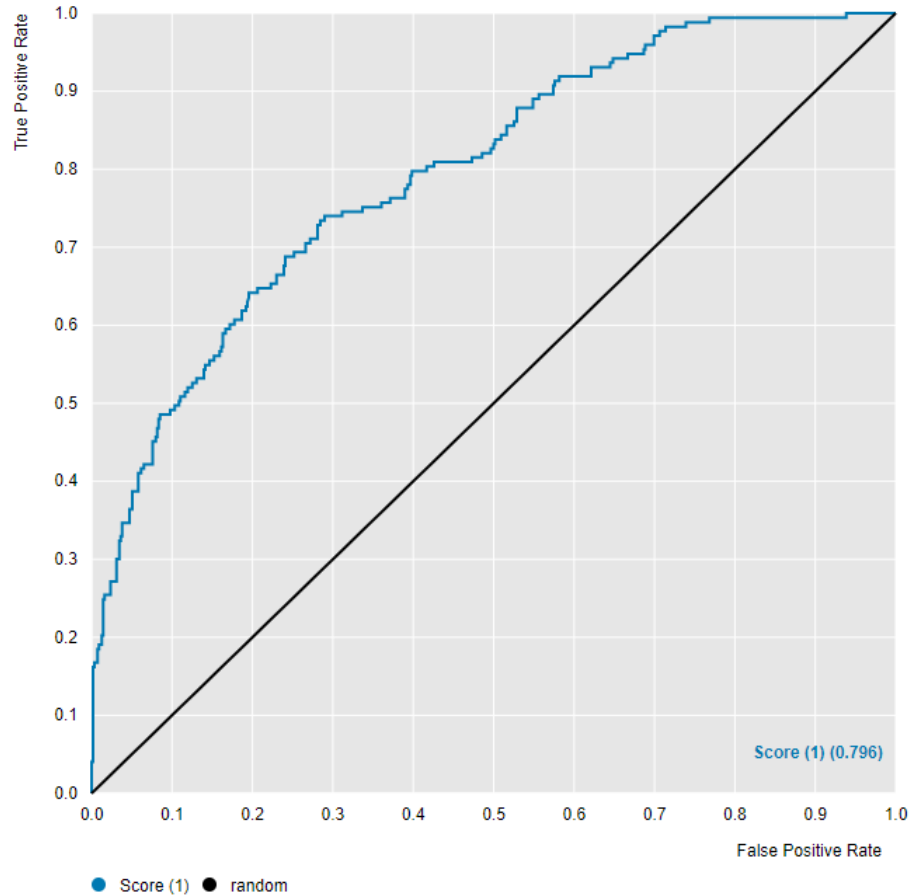

N=725

|                   |                          |
|-------------------|--------------------------|
| Top 10% Mean IC50 | 304 nM<br>(one 14000 nM) |
|-------------------|--------------------------|

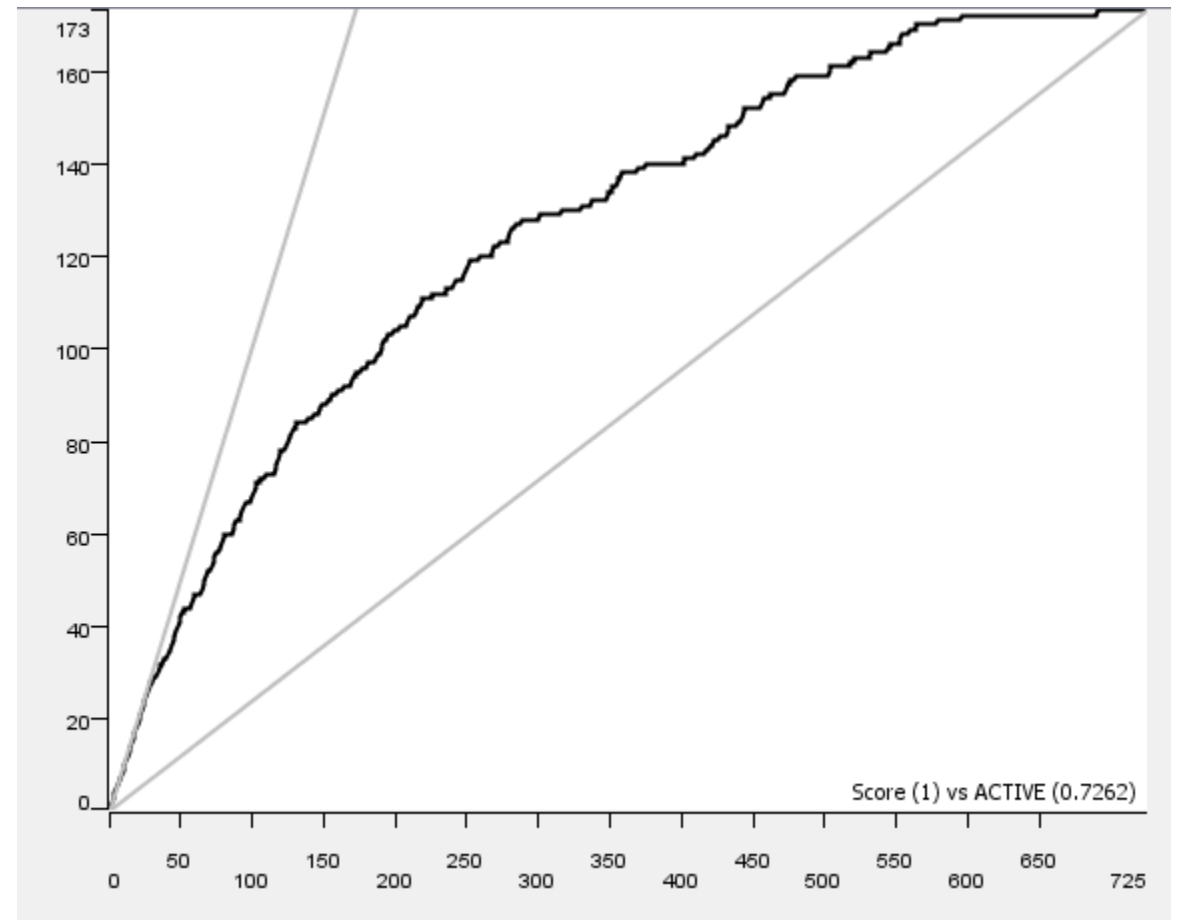

|          | Predicted Active | Predicted Inactive |
|----------|------------------|--------------------|
| Active   | 127              | 46                 |
| Inactive | 160              | 392                |

# <15nM DefGood in JAK2, 10% error

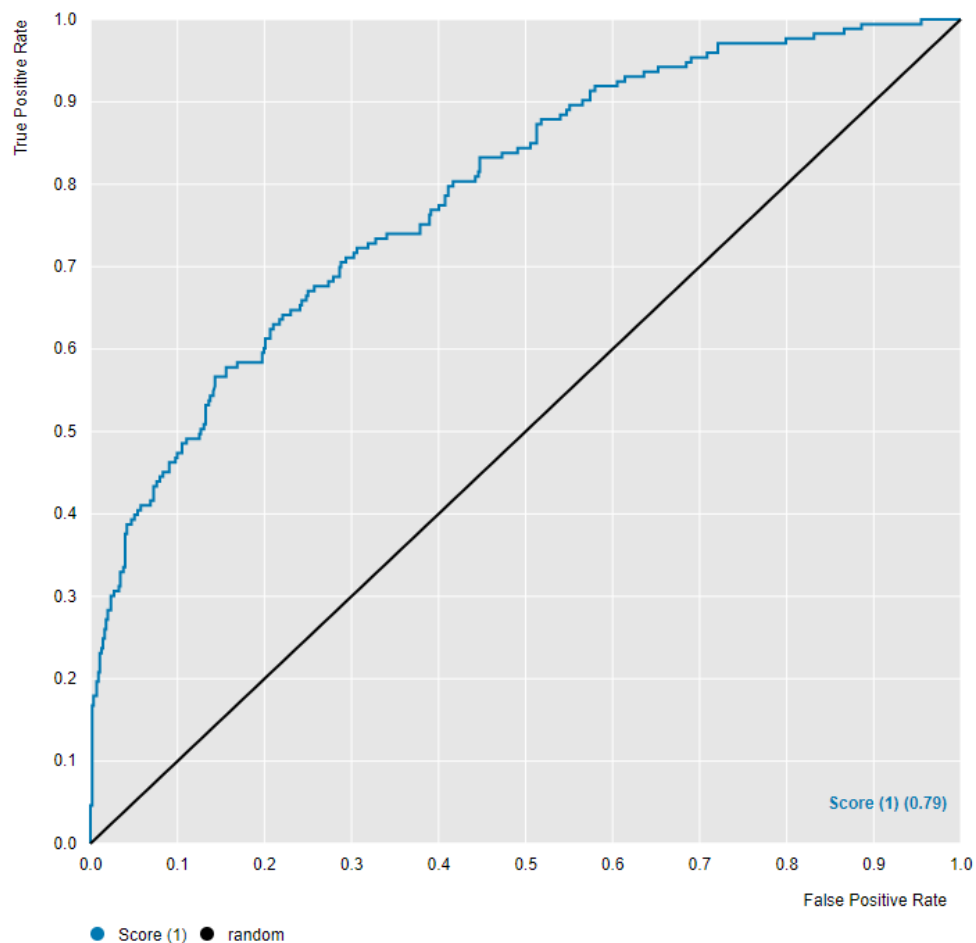

N=725

| Top 10% Mean<br>IC50 | 258 nM<br>(one 14000 nM) |
|----------------------|--------------------------|
|----------------------|--------------------------|

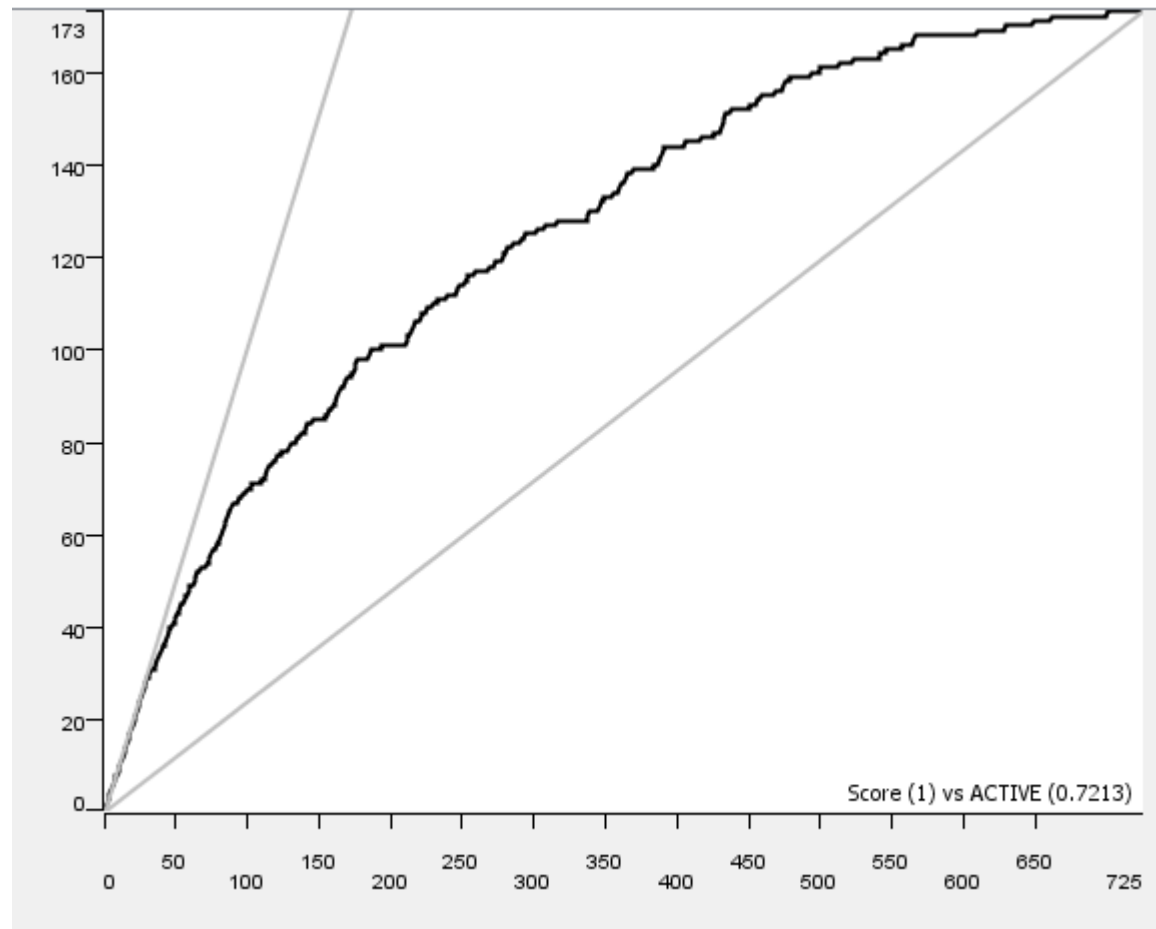

|          | Predicted Active | Predicted Inactive |
|----------|------------------|--------------------|
| Active   | 125              | 48                 |
| Inactive | 170              | 382                |

# <15nM DefGood in JAK2, 15% error

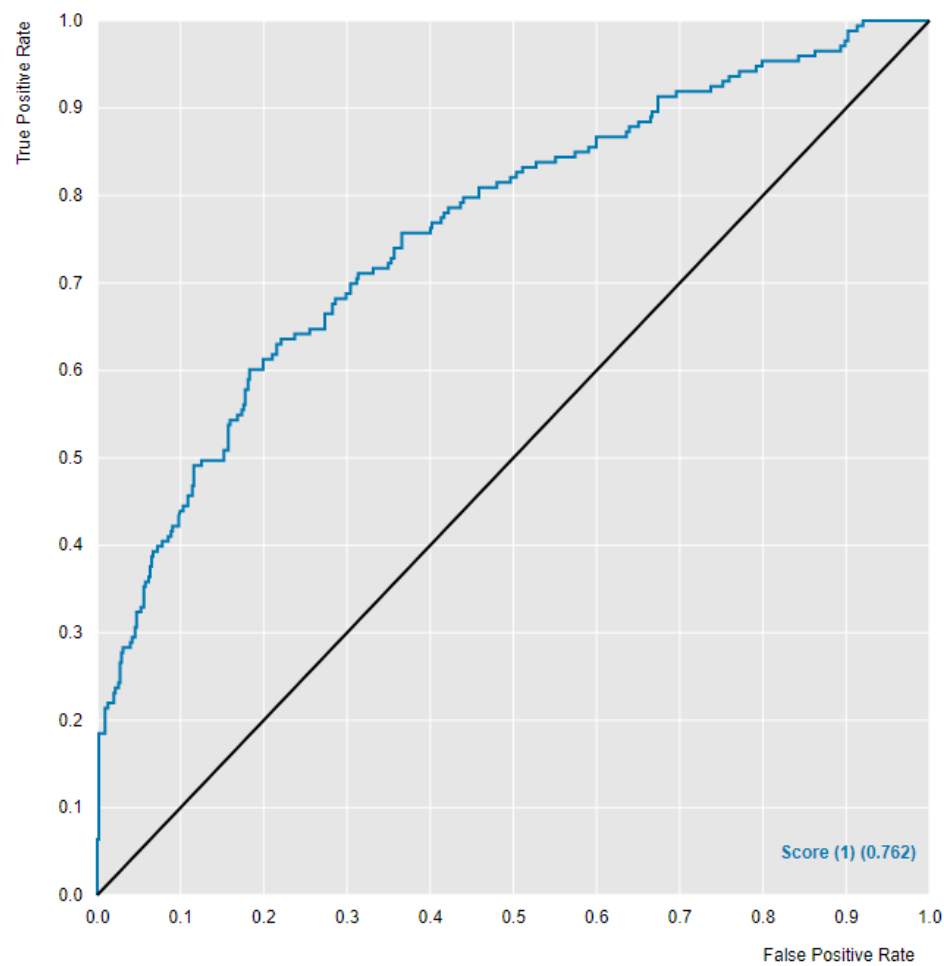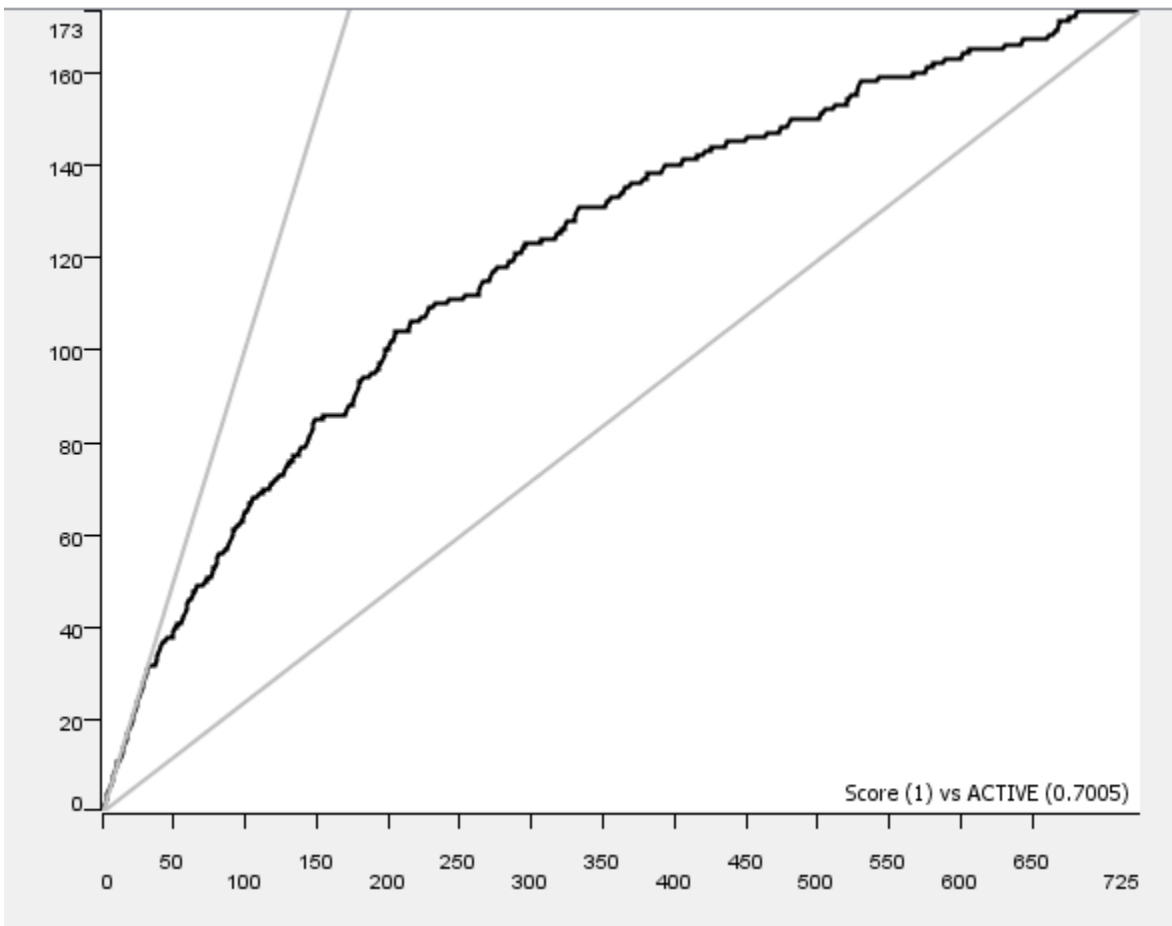

N=725

● Score (1) ● random

| Top 10% Mean IC50 | 82.3 nM |
|-------------------|---------|
|-------------------|---------|

|          | Predicted Active | Predicted Inactive |
|----------|------------------|--------------------|
| Active   | 104              | 69                 |
| Inactive | 105              | 447                |

# <15nM DefGood in JAK2, 20% error

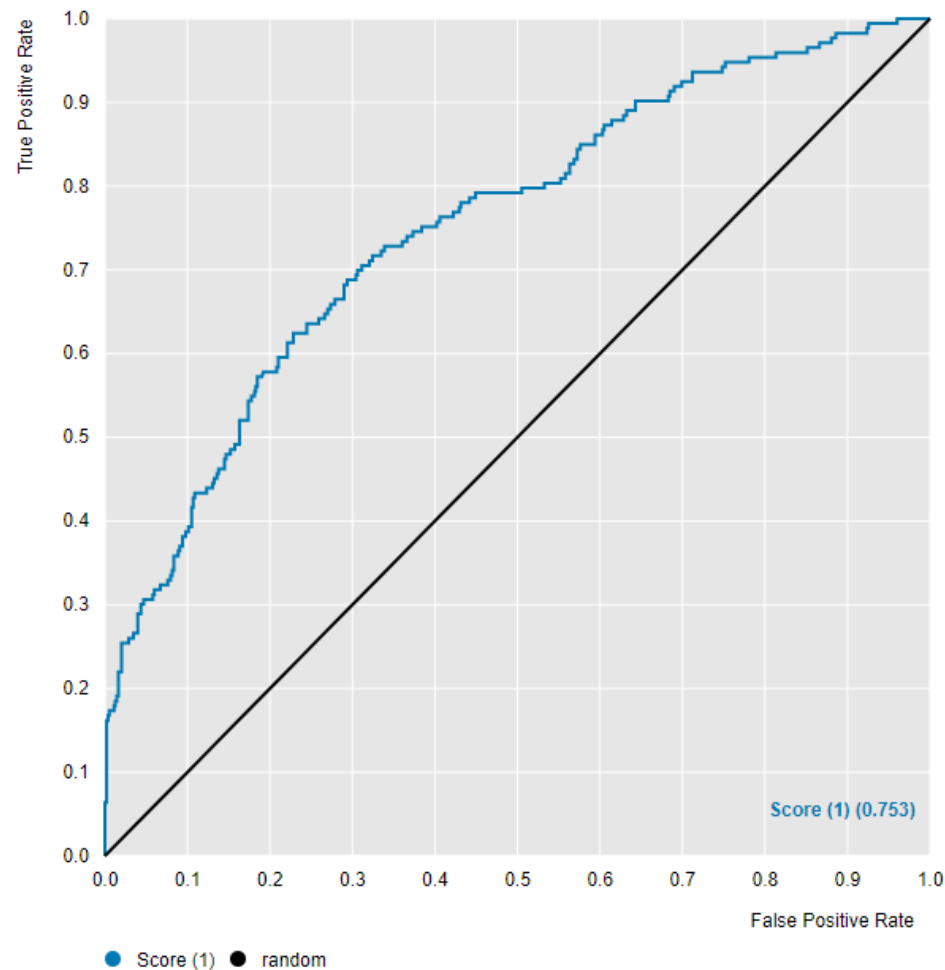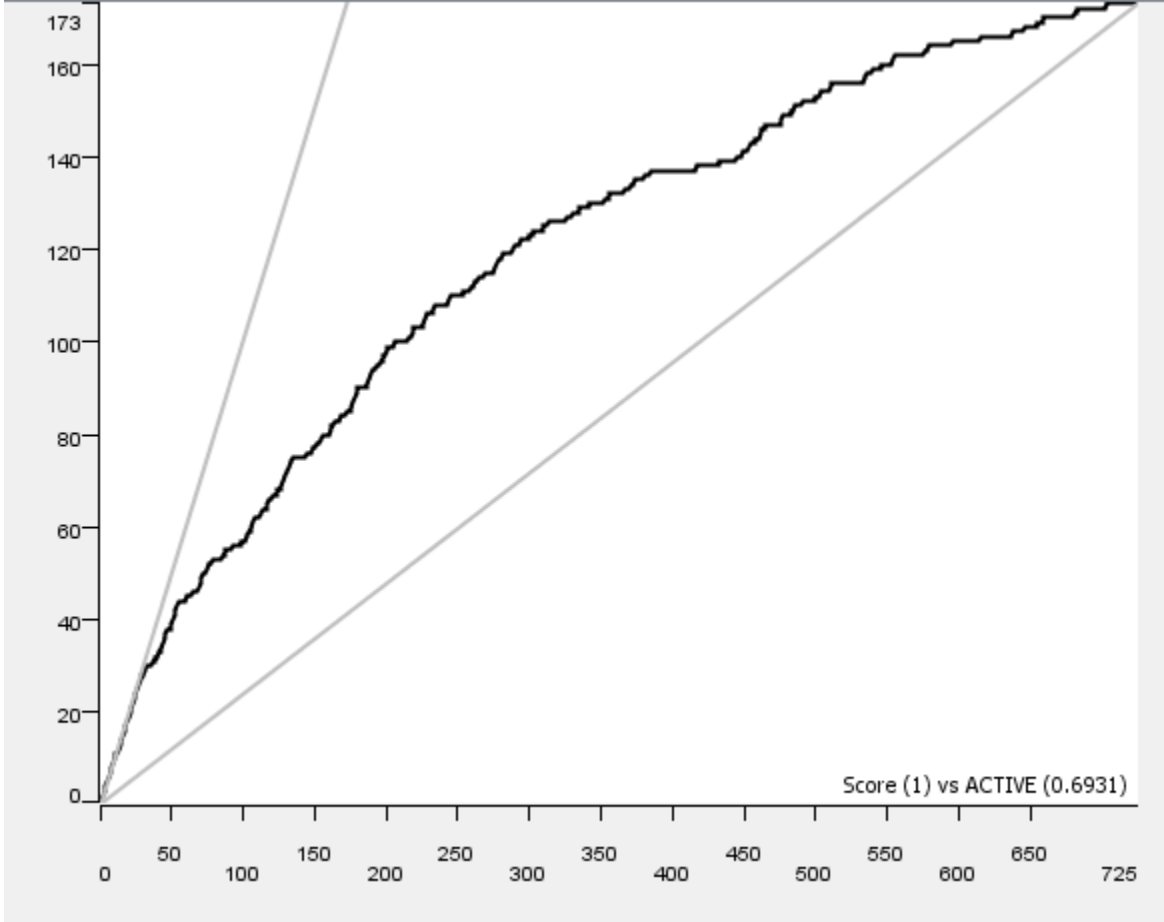

N=725

|                      |         |
|----------------------|---------|
| Top 10% Mean<br>IC50 | 55.7 nM |
|----------------------|---------|

|          | Predicted Active | Predicted Inactive |
|----------|------------------|--------------------|
| Active   | 128              | 45                 |
| Inactive | 203              | 349                |



# <15nM DefGood in JAK2, 30% error

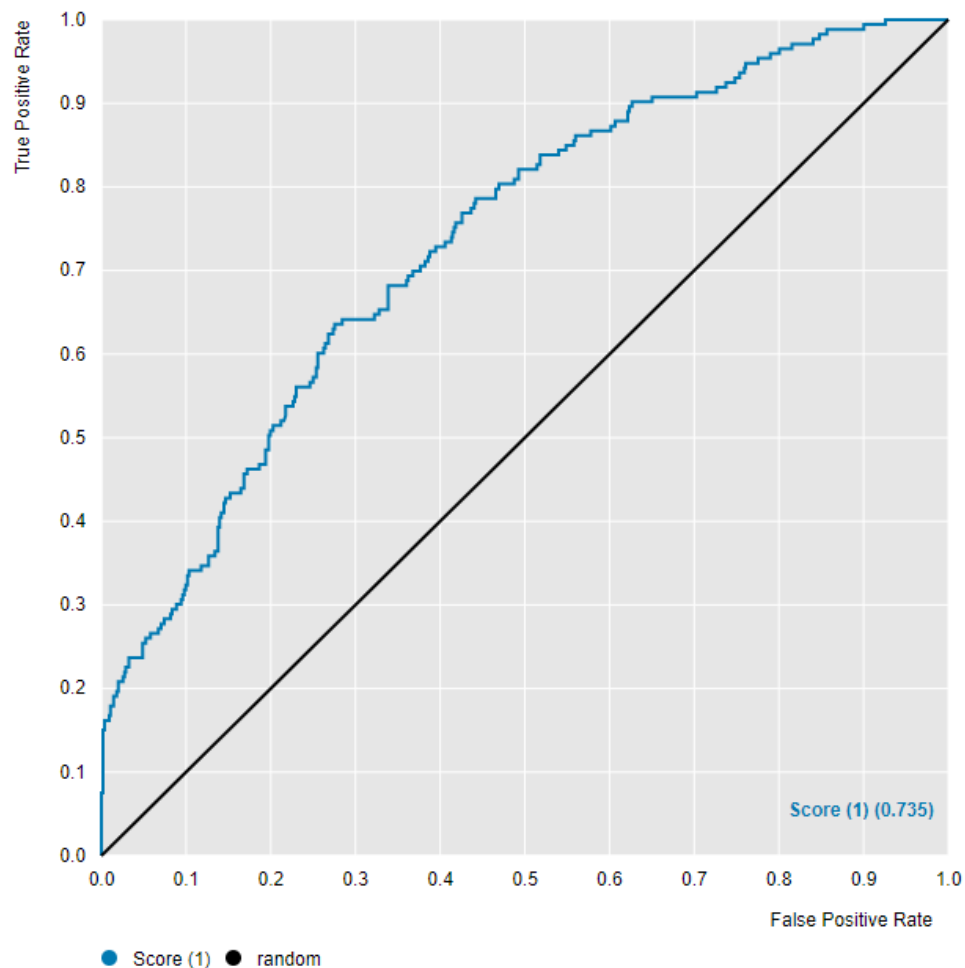

N=725

| Top 10% Mean<br>IC50 | 53.4 nM |
|----------------------|---------|
|----------------------|---------|

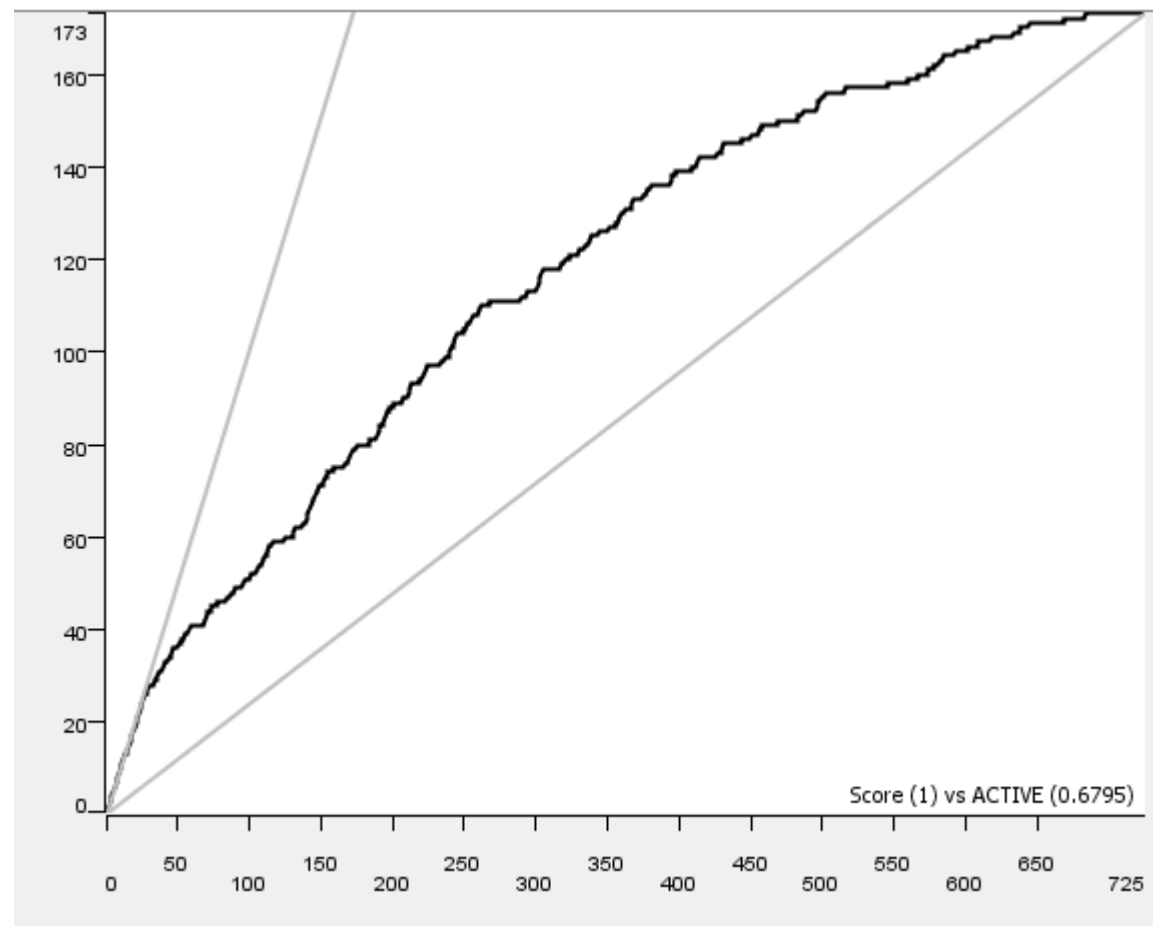

|          | Predicted Active | Predicted Inactive |
|----------|------------------|--------------------|
| Active   | 109              | 64                 |
| Inactive | 151              | 401                |

# <15nM DefGood in JAK2, 35% error

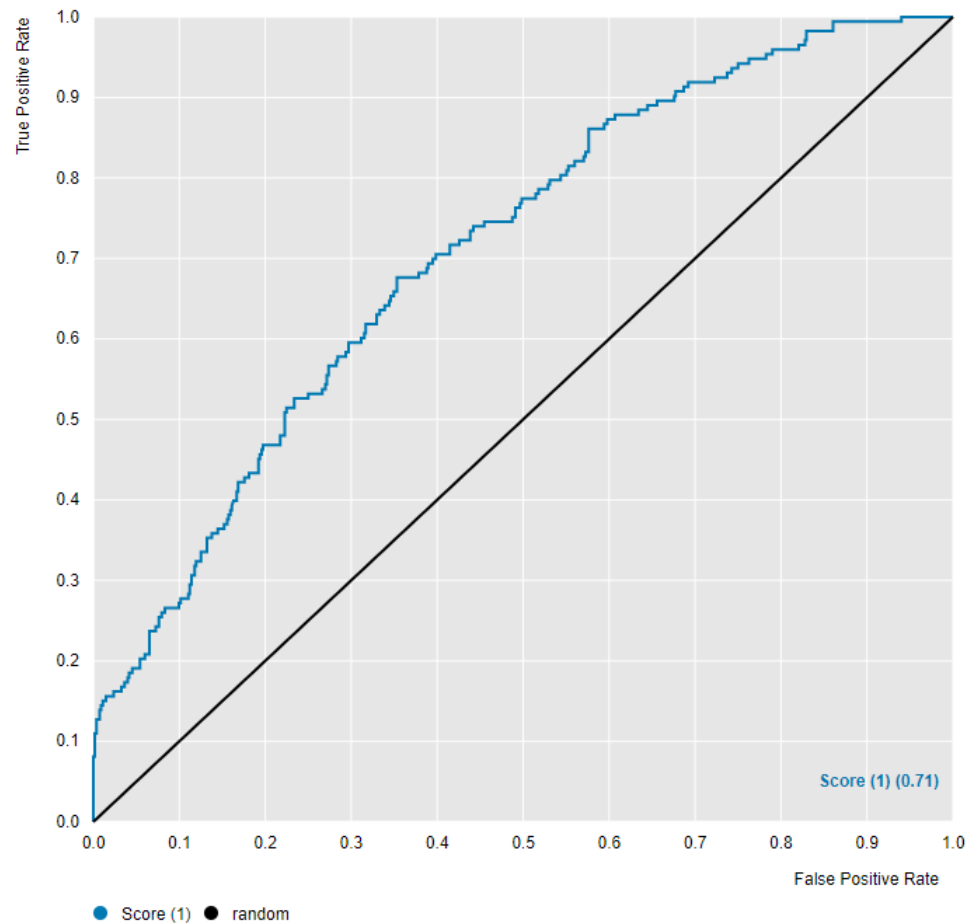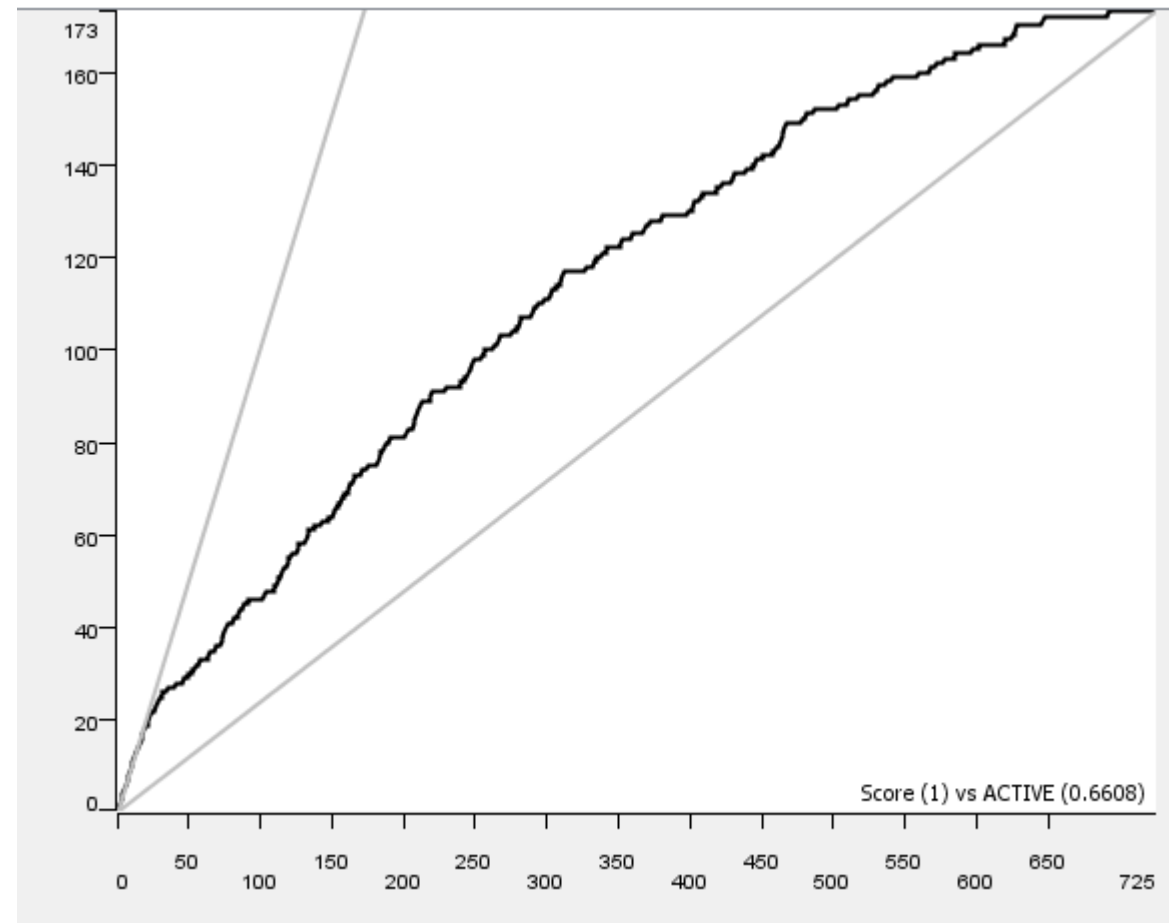

N=725

| Top 10% Mean IC50 | 77.7 nM |
|-------------------|---------|
|-------------------|---------|

|          | Predicted Active | Predicted Inactive |
|----------|------------------|--------------------|
| Active   | 136              | 37                 |
| Inactive | 288              | 264                |

# <15nM DefGood in JAK2, 40% error

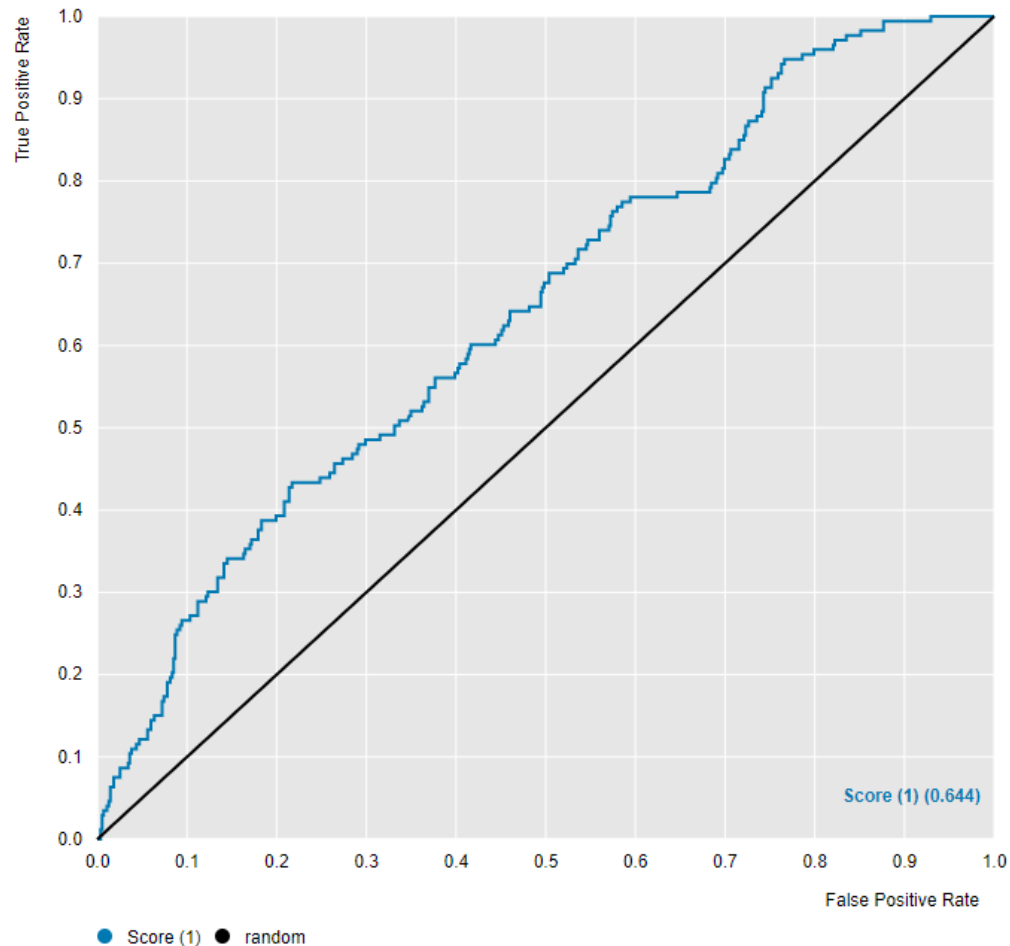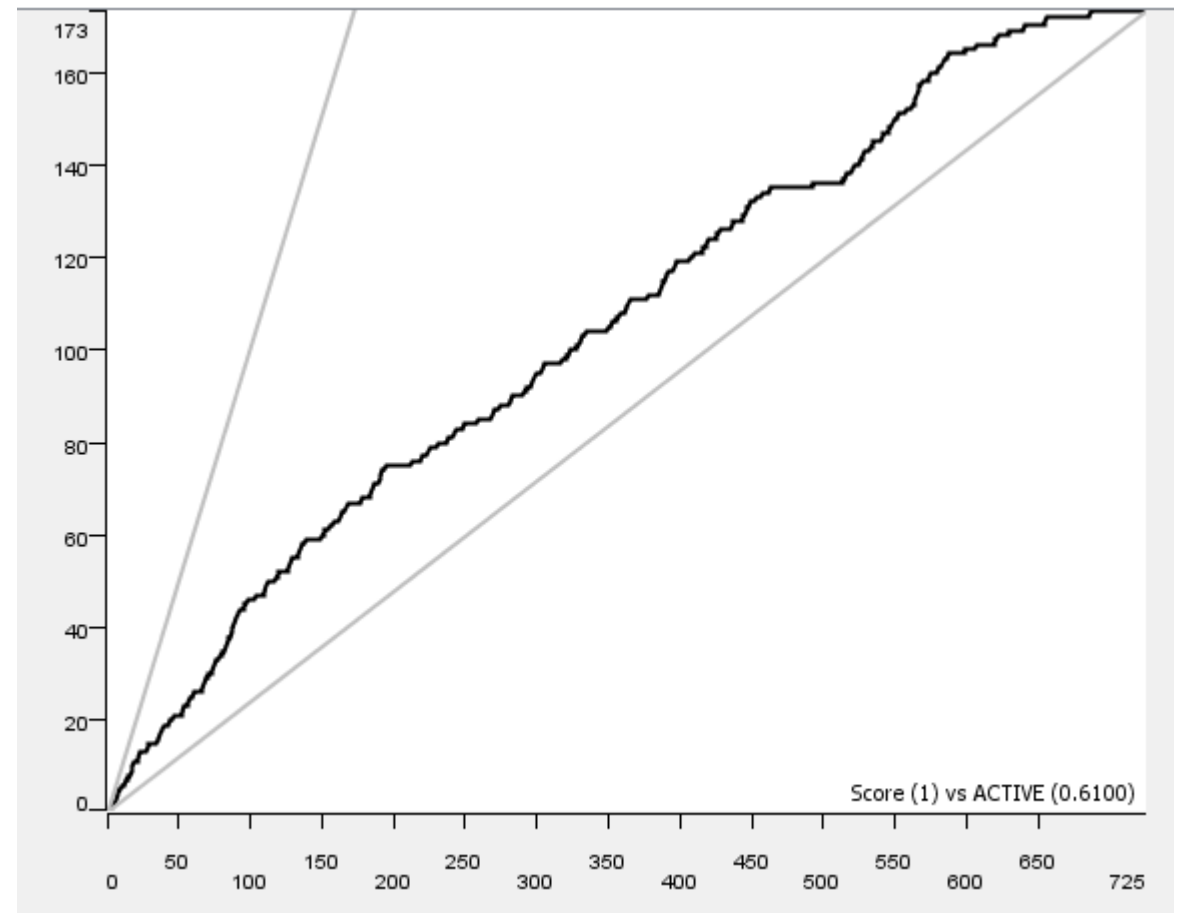

N=725

Top 10% Mean  
IC50

131 nM

|          | Predicted Active | Predicted Inactive |
|----------|------------------|--------------------|
| Active   | 75               | 98                 |
| Inactive | 134              | 418                |

<15nM DefGood in JAK2, 10% error; Random seed = 429

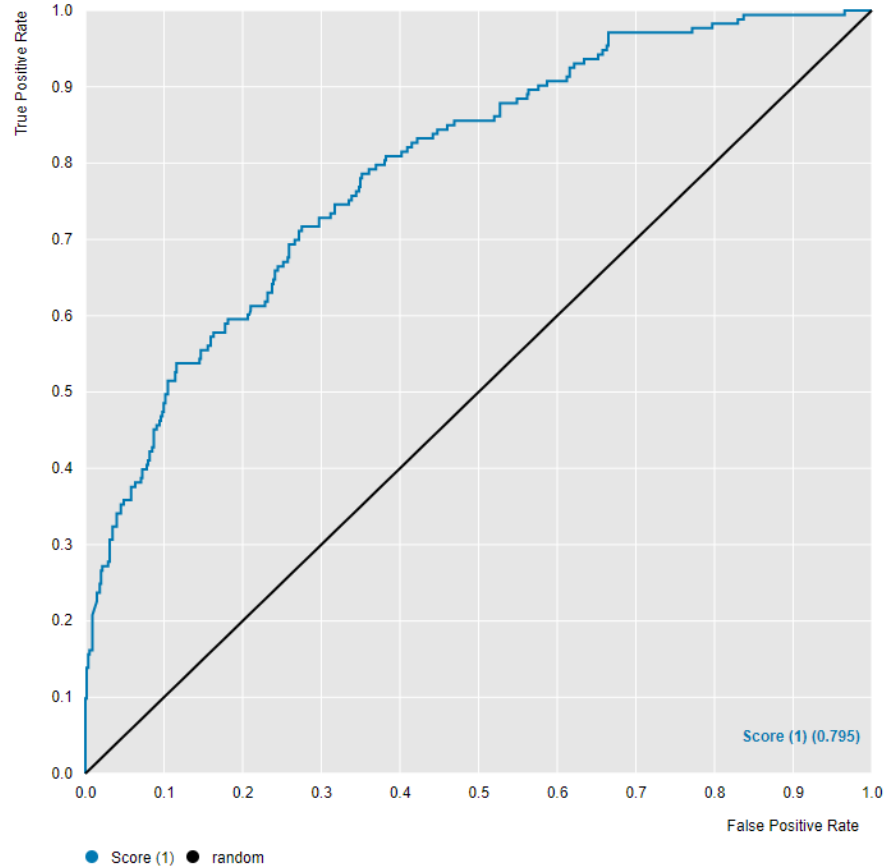

N=725

Top 10% Mean  
IC50

71.9 nM

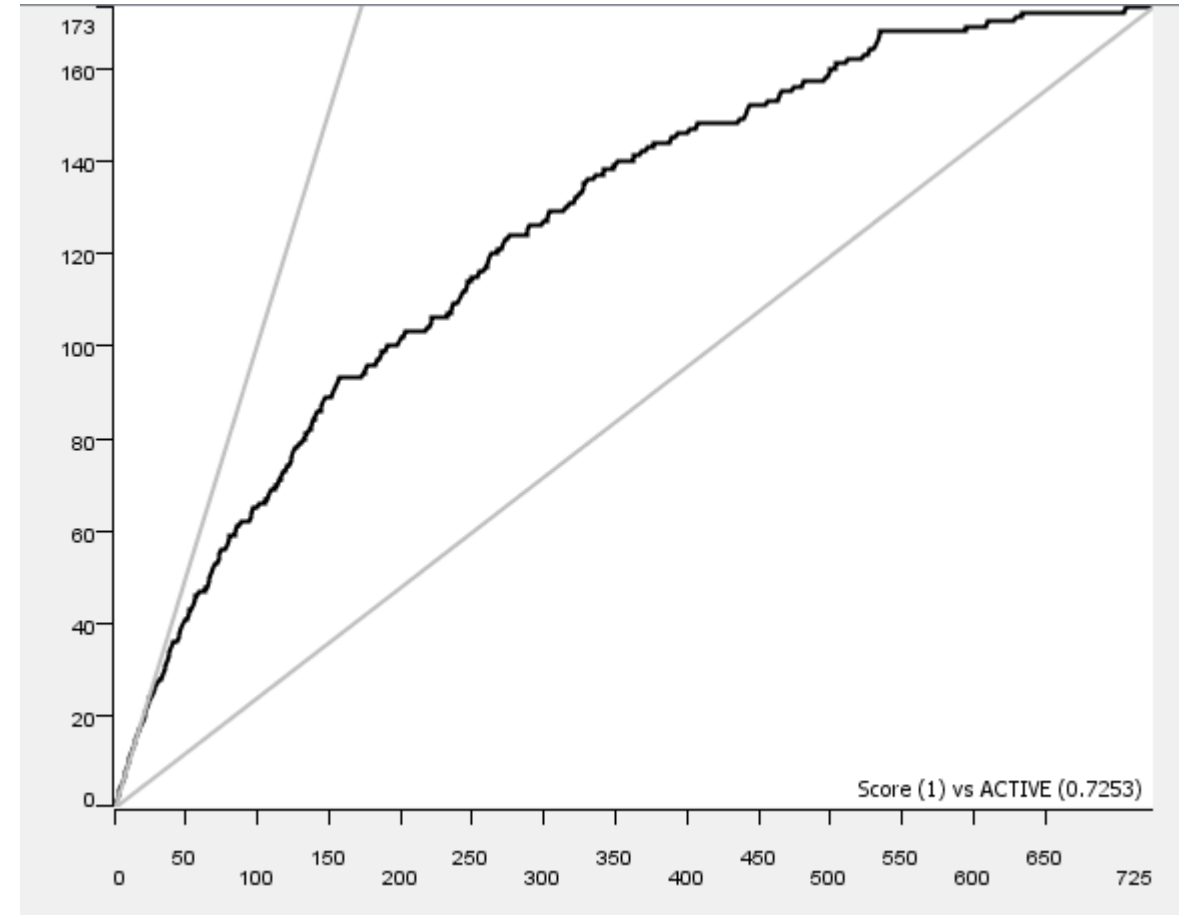

|          | Predicted Active | Predicted Inactive |
|----------|------------------|--------------------|
| Active   | 109              | 64                 |
| Inactive | 128              | 424                |

<15nM DefGood in JAK2, 20% error; Random seed = 429

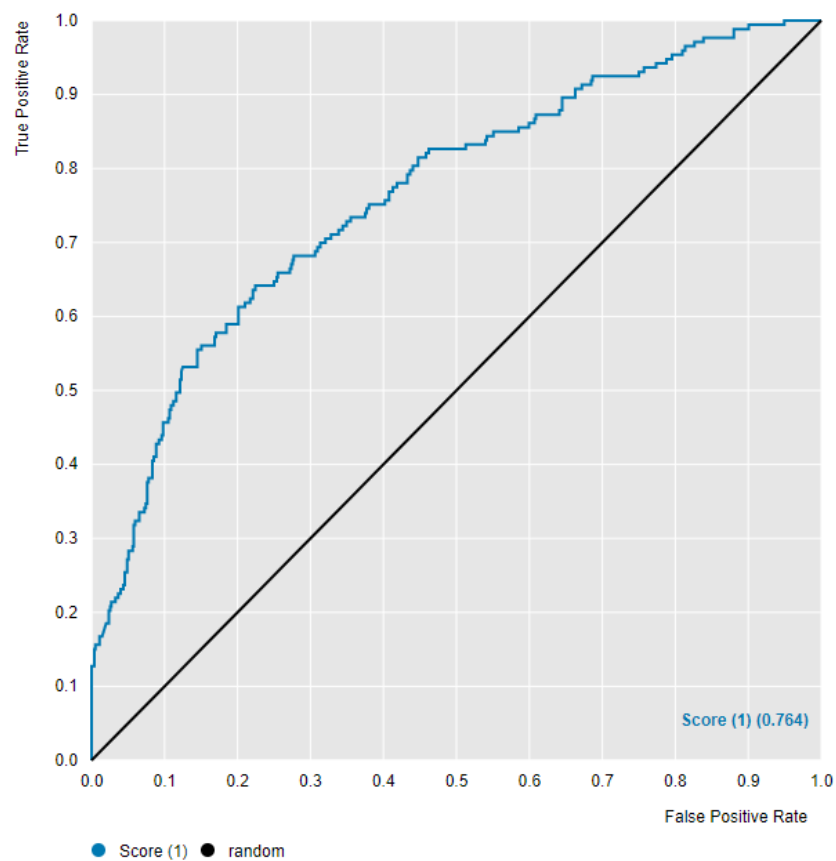

N=725

Top 10% Mean  
IC50

419 nM

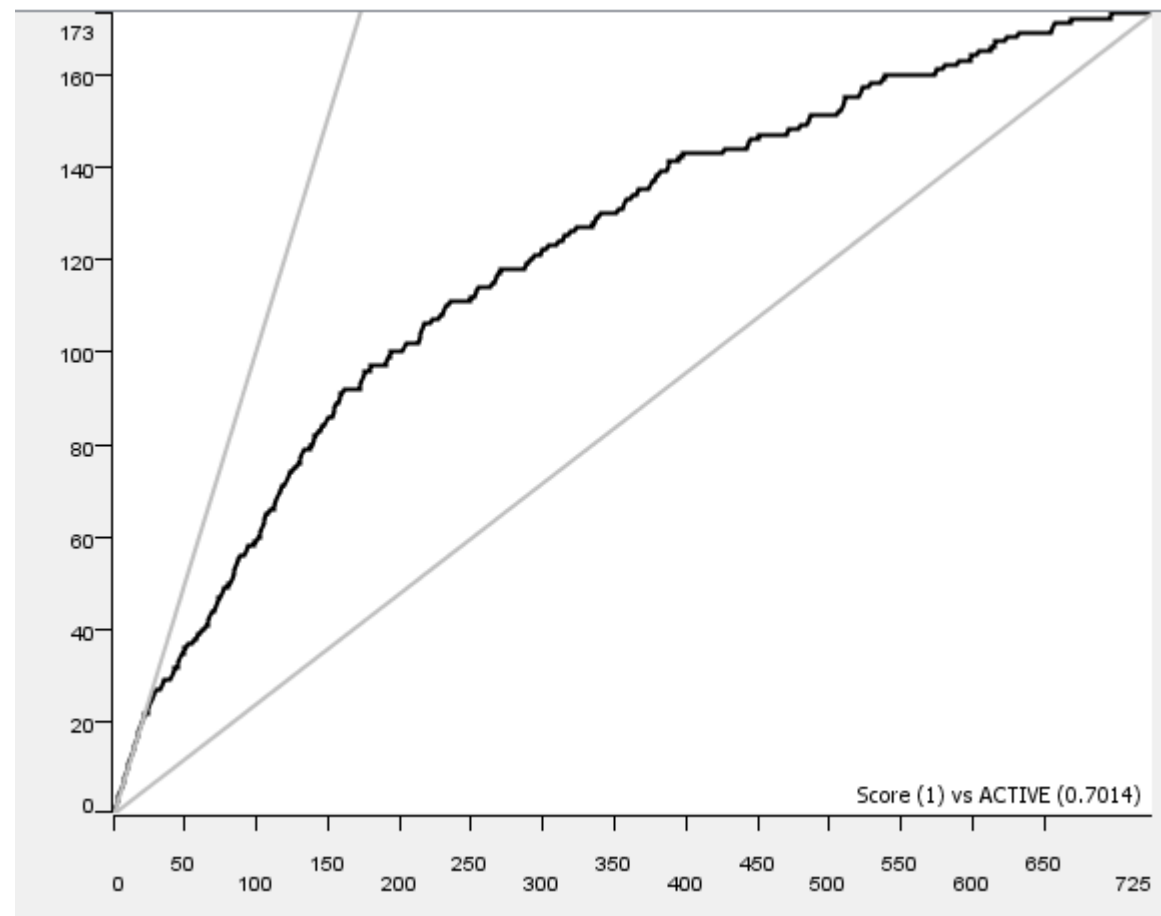

|          | Predicted Active | Predicted Inactive |
|----------|------------------|--------------------|
| Active   | 118              | 55                 |
| Inactive | 155              | 397                |

<15nM DefGood in JAK2, 25% error; Random seed = 429

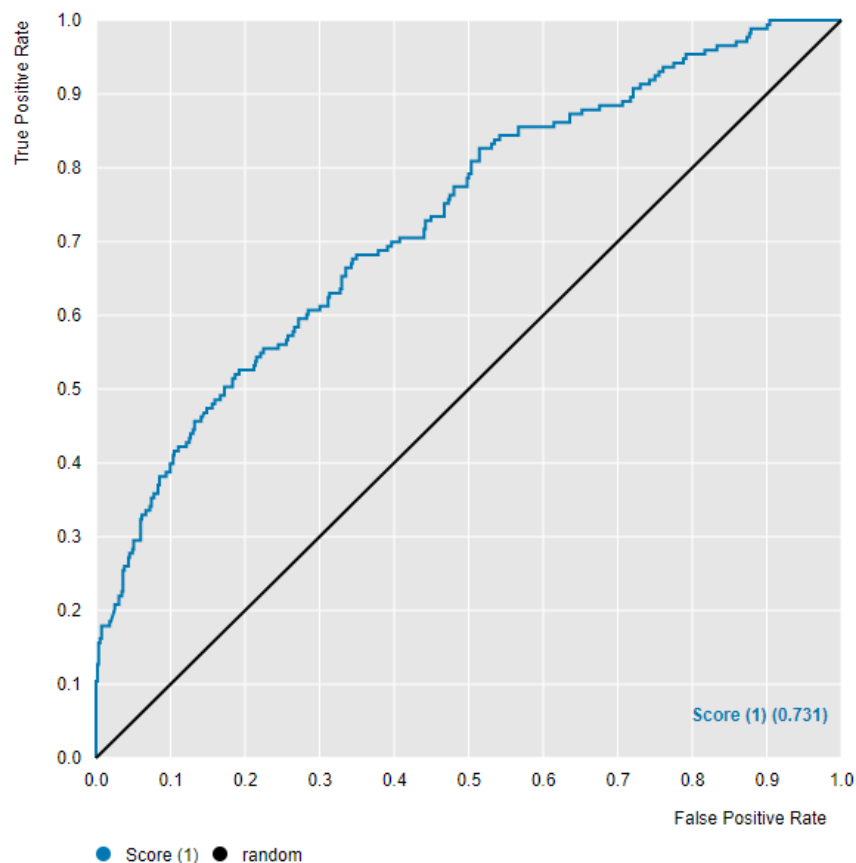

N=725

Top 10% Mean  
IC50

431 nM

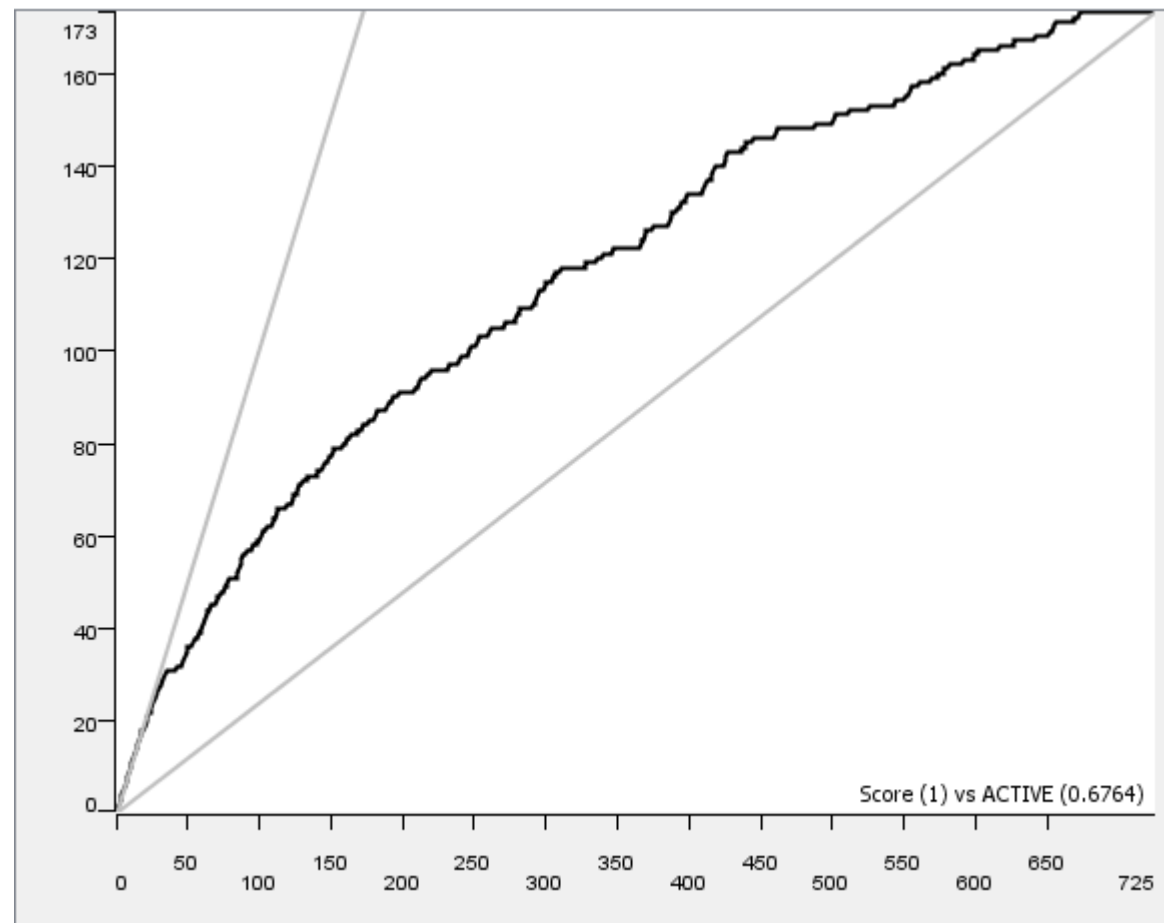

|          | Predicted Active | Predicted Inactive |
|----------|------------------|--------------------|
| Active   | 77               | 96                 |
| Inactive | 73               | 479                |

<5nM DefGood in JAK2, 30% error; Random seed = 429

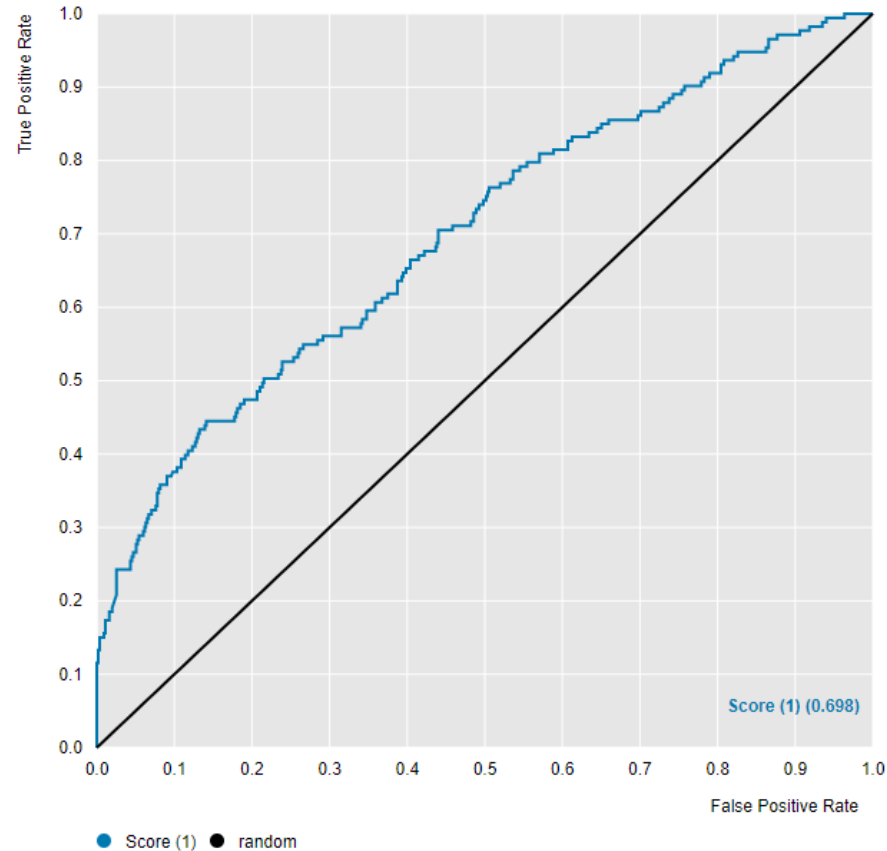

N=725

Top 10% Mean  
IC50

418 nM

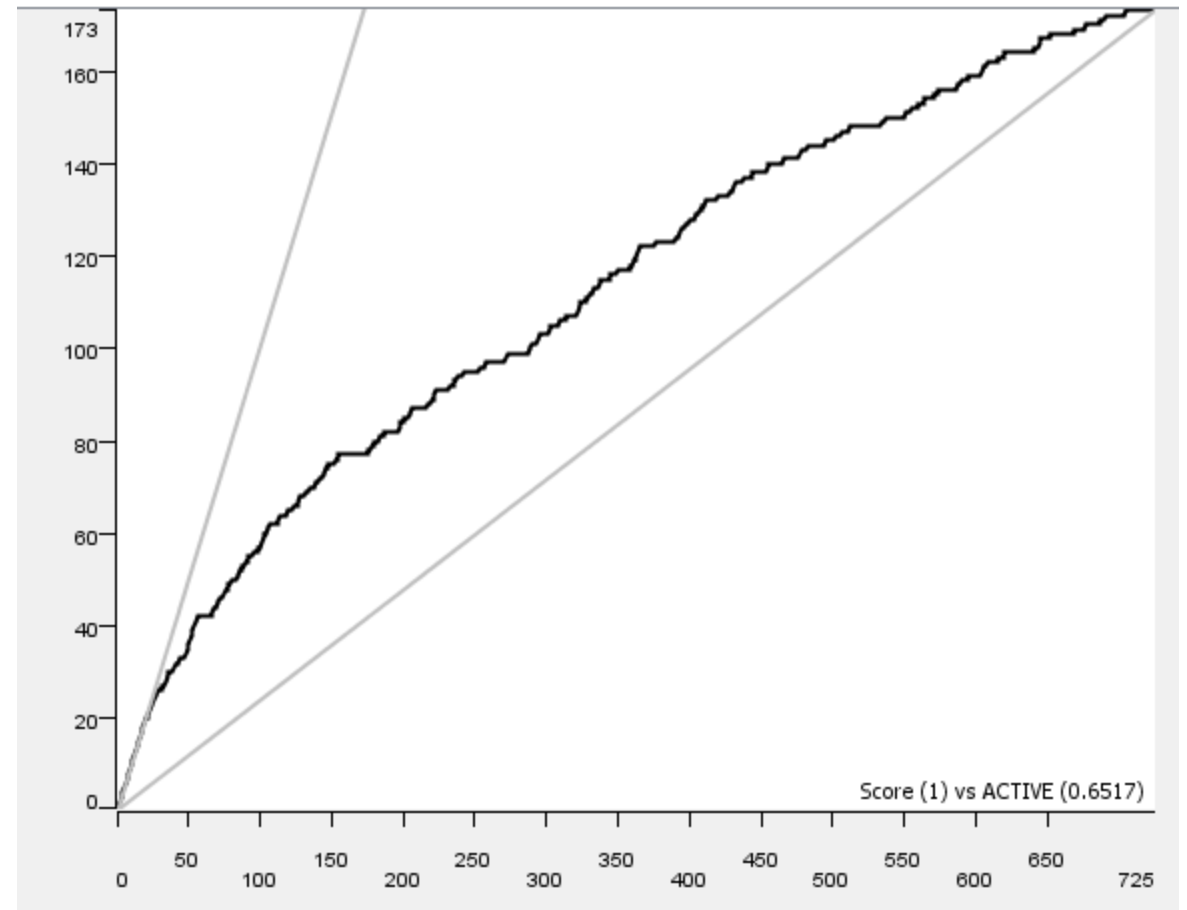

|          | Predicted Active | Predicted Inactive |
|----------|------------------|--------------------|
| Active   | 97               | 76                 |
| Inactive | 166              | 386                |

# <15nM DefGood in JAK2, 10% error; Random seed = 121783

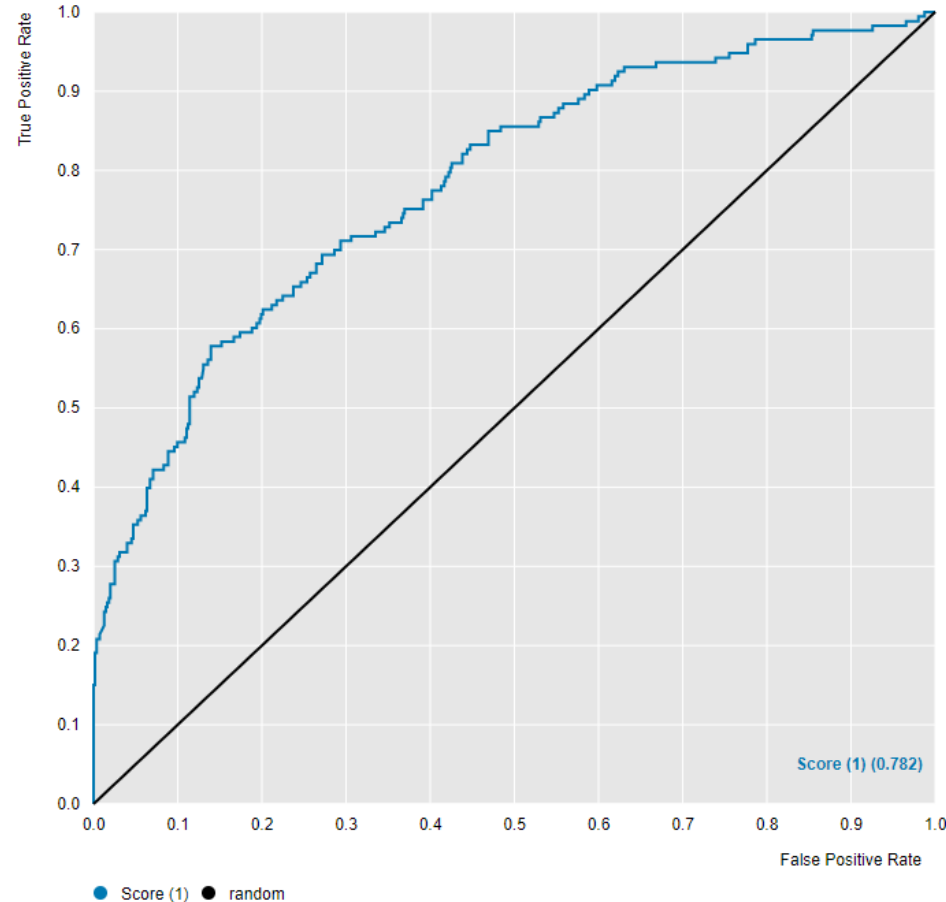

N=725

|                   |                                     |
|-------------------|-------------------------------------|
| Top 10% Mean IC50 | 1,427 nM<br>(4 micromolar mistakes) |
|-------------------|-------------------------------------|

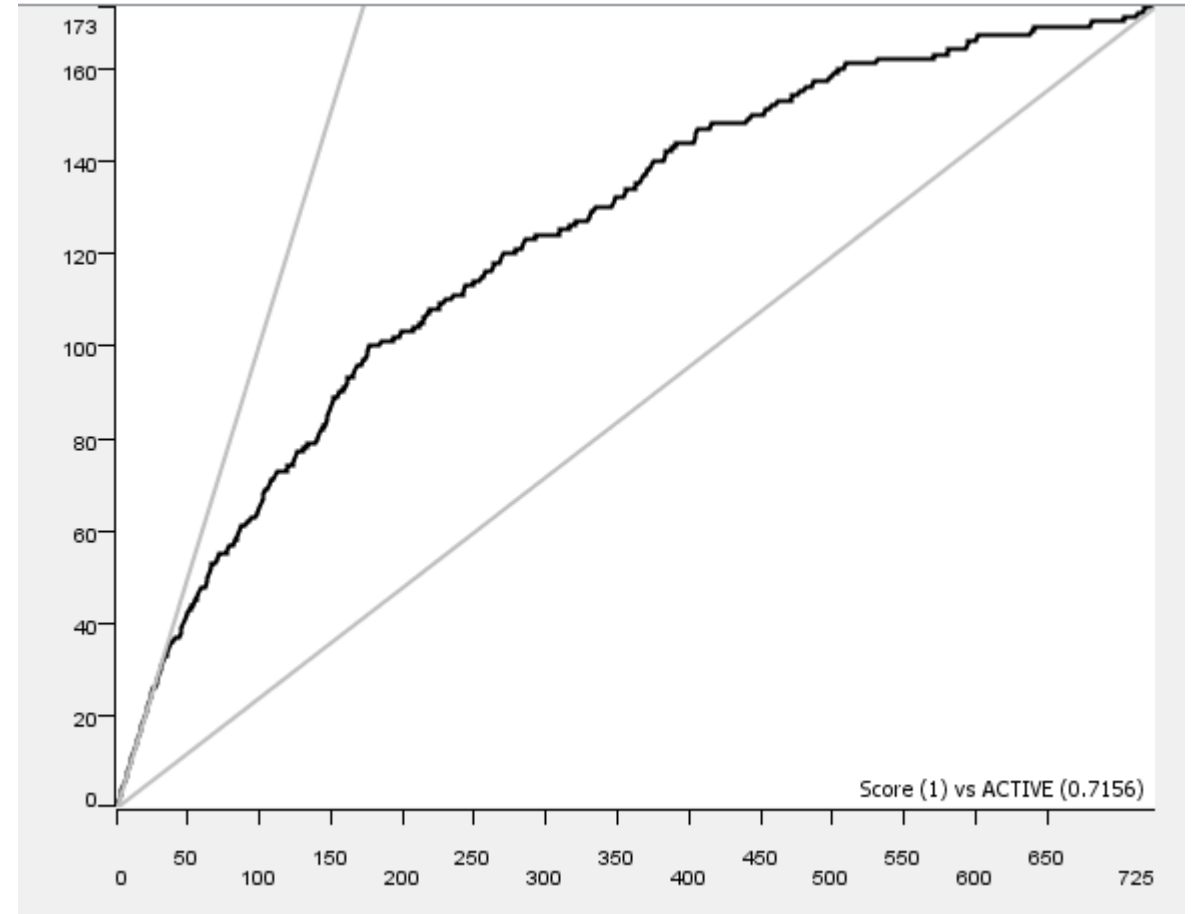

|          | Predicted Active | Predicted Inactive |
|----------|------------------|--------------------|
| Active   | 134              | 39                 |
| Inactive | 227              | 325                |



<15nM DefGood in JAK2, 0% error; Random seed = 121783

|                   |                                                                      |
|-------------------|----------------------------------------------------------------------|
| Top 10% Mean IC50 | 1,427 nM<br>(4 micromolar mistakes)<br><br>This sample was discarded |
|-------------------|----------------------------------------------------------------------|

N=725

|          | Predicted Active | Predicted Inactive |
|----------|------------------|--------------------|
| Active   | 134              | 39                 |
| Inactive | 227              | 325                |

<15nM DefGood in JAK2, 10% error; Random seed = 12178

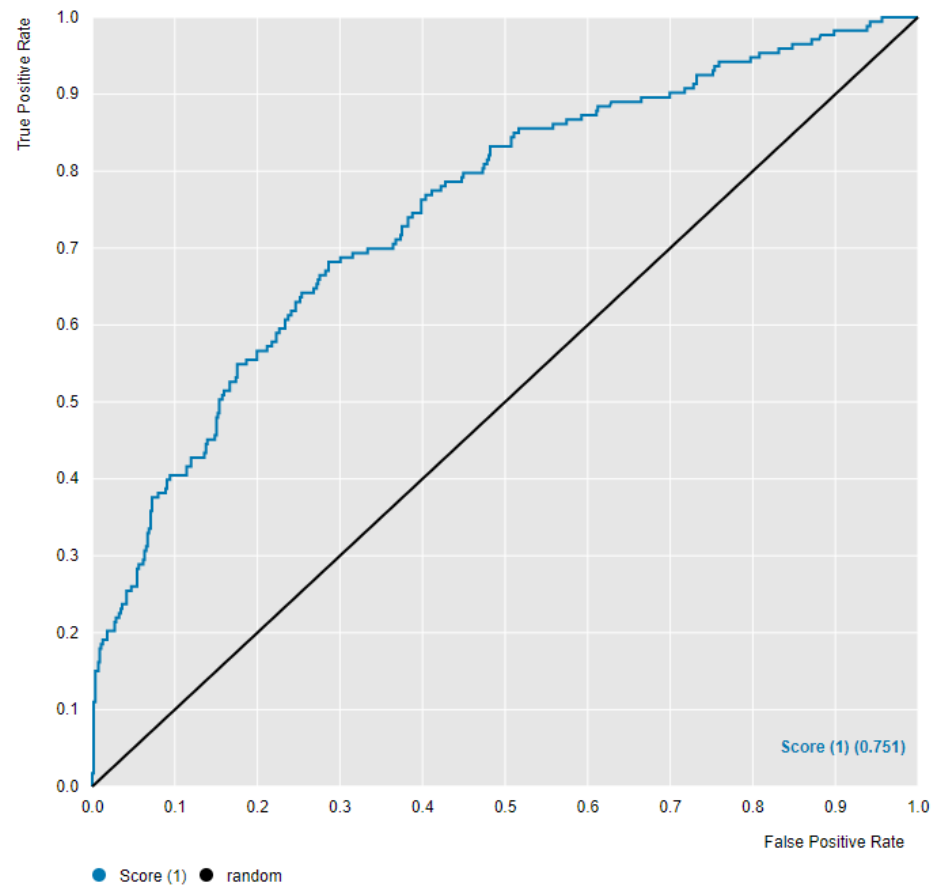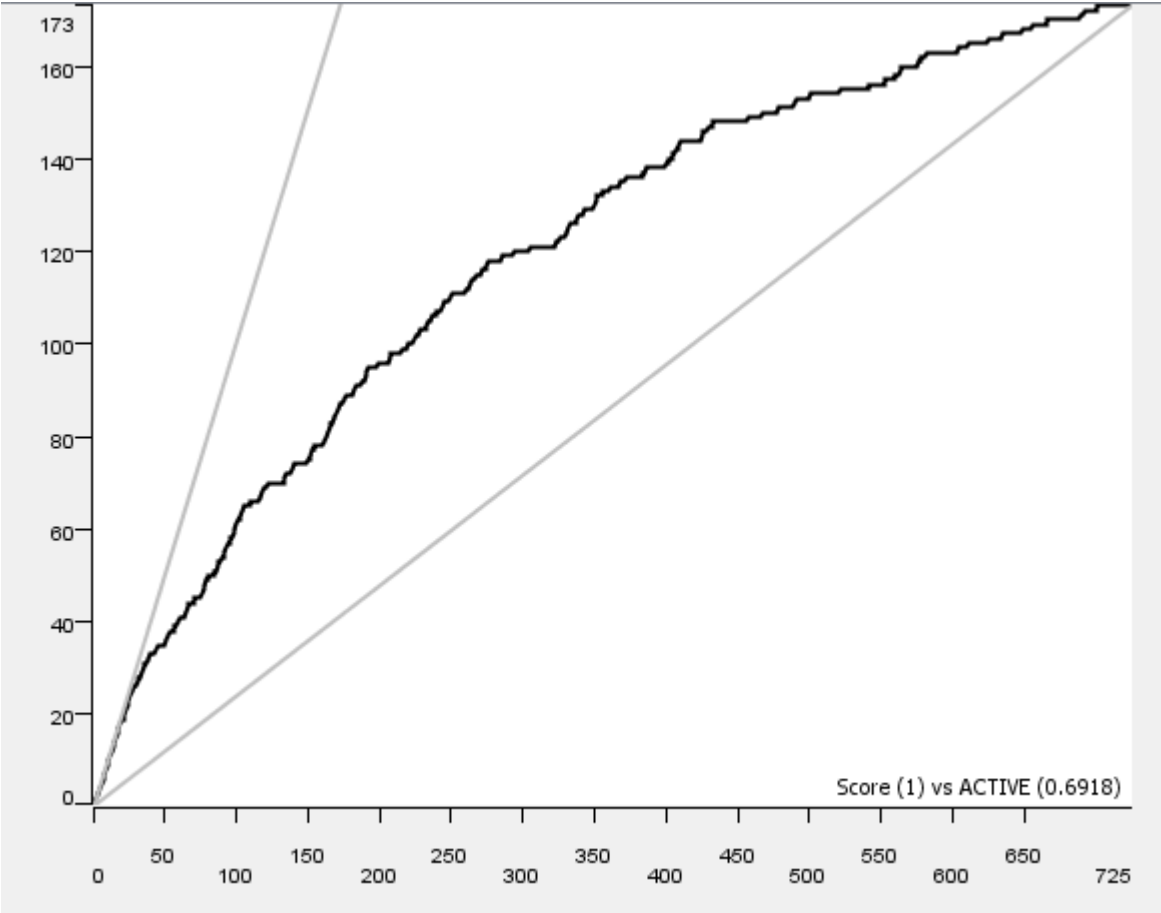

N=725

|                   |         |
|-------------------|---------|
| Top 10% Mean IC50 | 65.7 nM |
|-------------------|---------|

|          | Predicted Active | Predicted Inactive |
|----------|------------------|--------------------|
| Active   | 112              | 61                 |
| Inactive | 148              | 404                |

<15nM DefGood in JAK2, 20% error; Random seed = 12178

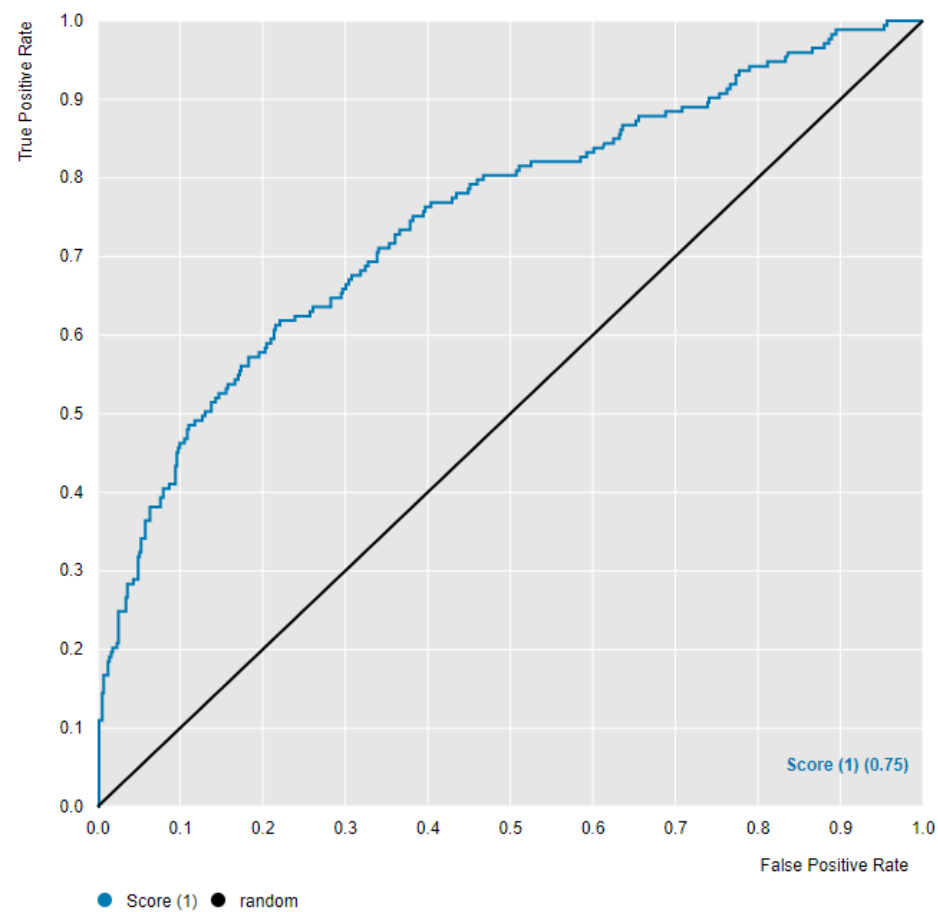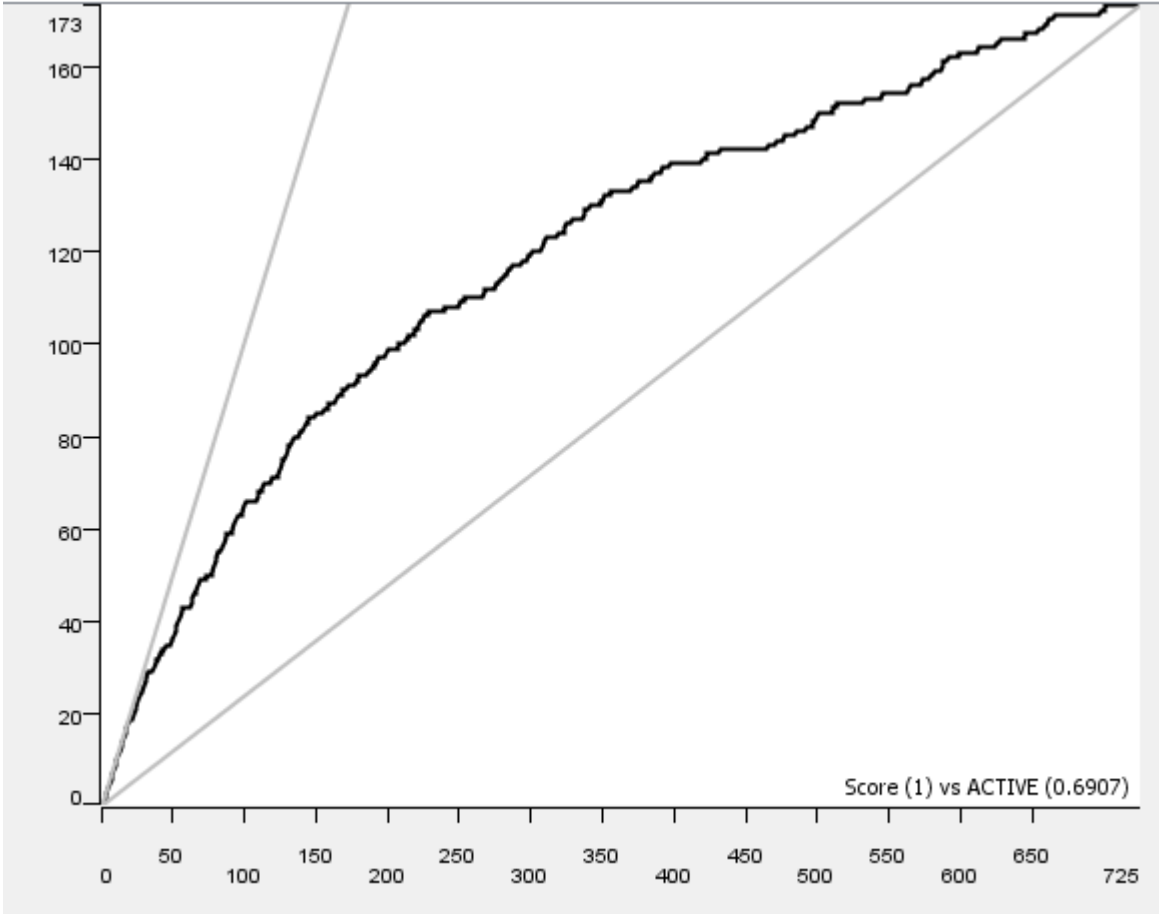

N=725

|                   |         |
|-------------------|---------|
| Top 10% Mean IC50 | 50.6 nM |
|-------------------|---------|

|          | Predicted Active | Predicted Inactive |
|----------|------------------|--------------------|
| Active   | 100              | 73                 |
| Inactive | 109              | 443                |

<15nM DefGood in JAK2, 30% error; Random seed = 12178

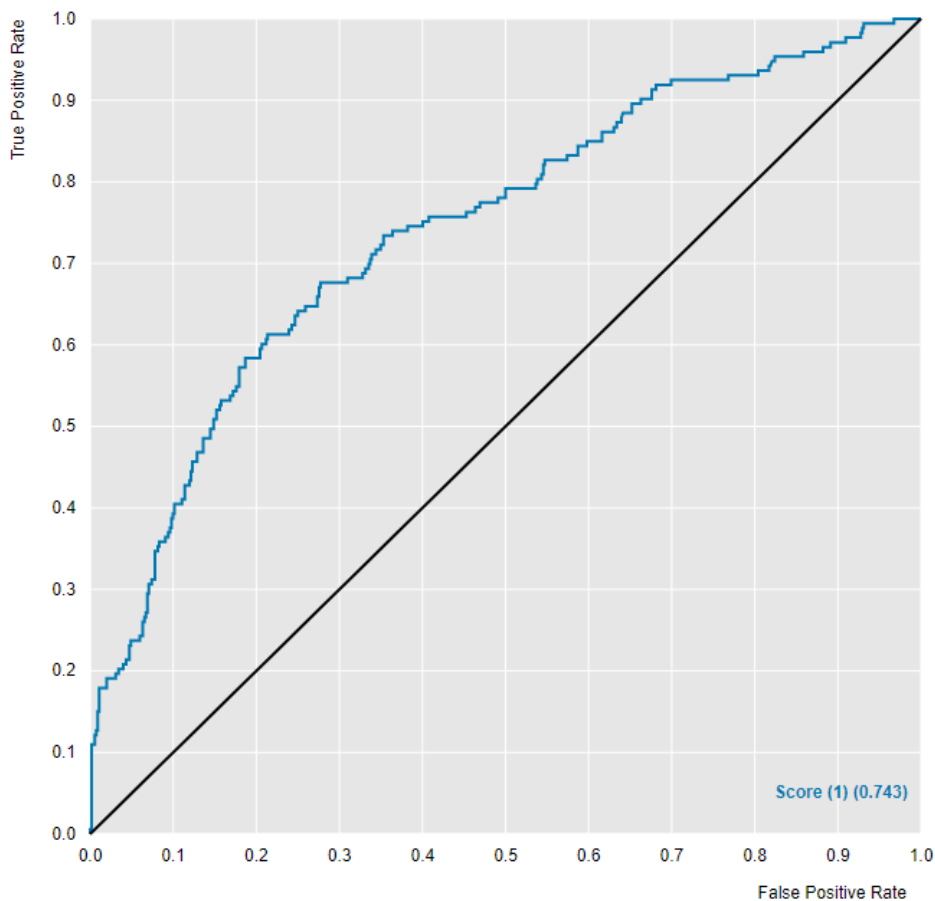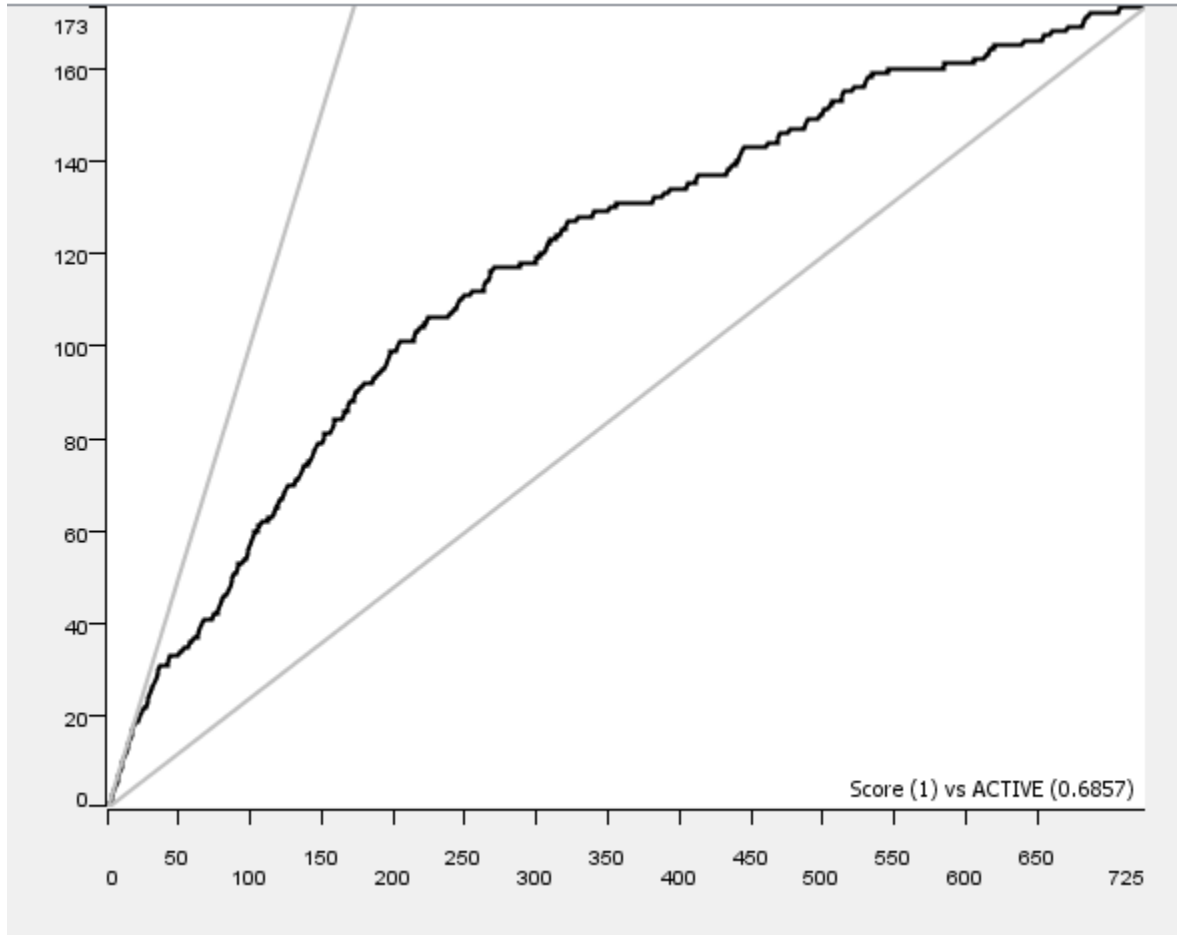

N=725

|                   |        |
|-------------------|--------|
| Top 10% Mean IC50 | 136 nM |
|-------------------|--------|

|          | Predicted Active | Predicted Inactive |
|----------|------------------|--------------------|
| Active   | 122              | 51                 |
| Inactive | 187              | 365                |

<15nM DefGood in JAK2, 35% error; Random  
seed = 12178

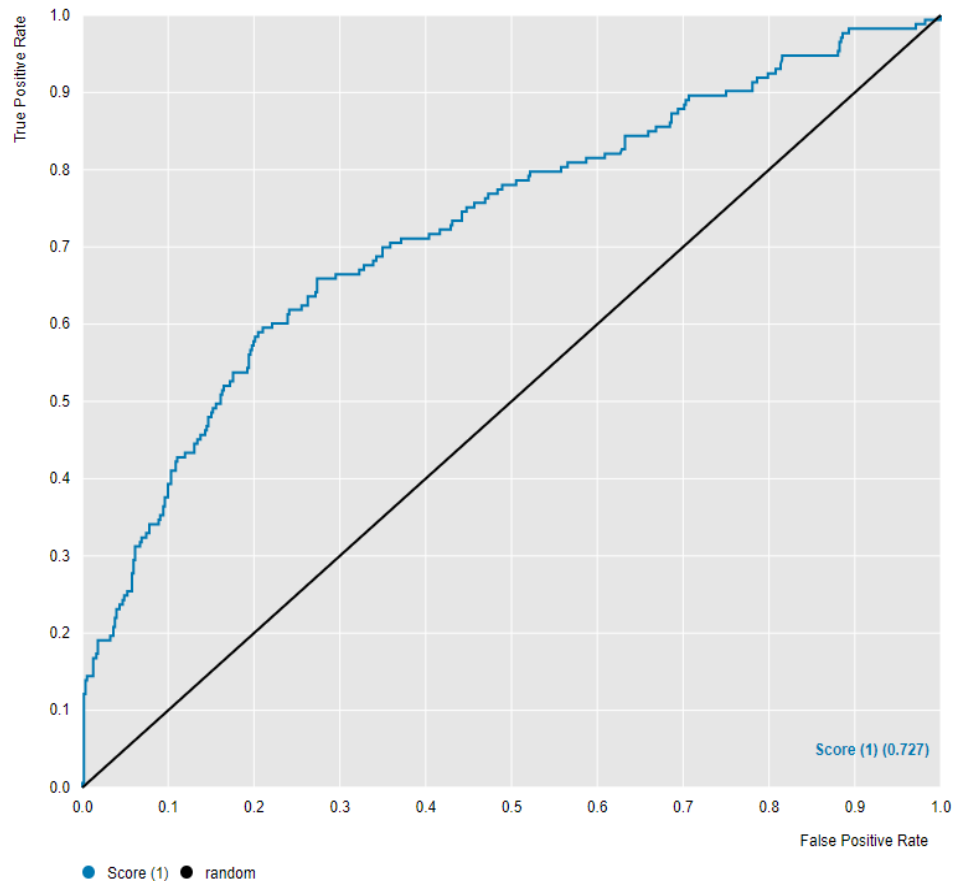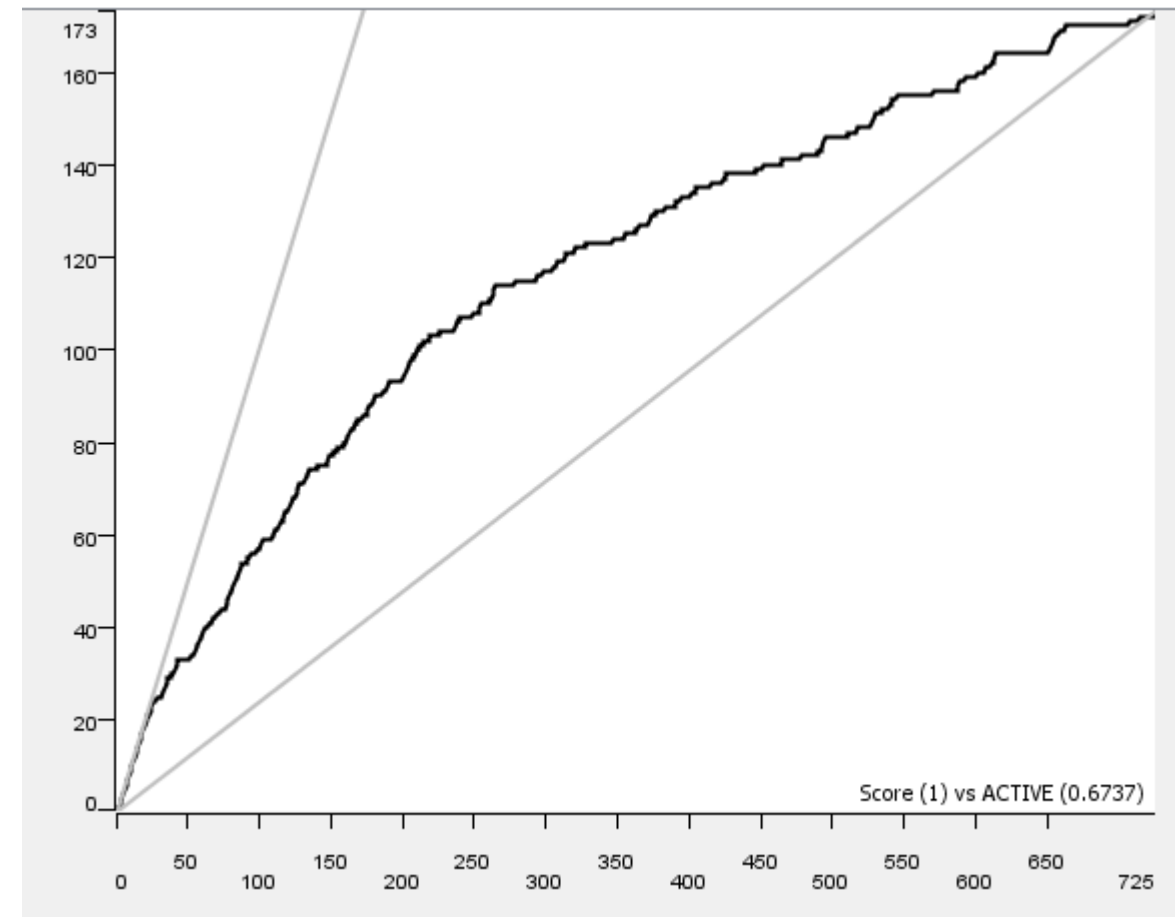

N=725

Top 10% Mean  
IC50

117 nM

|          | Predicted Active | Predicted Inactive |
|----------|------------------|--------------------|
| Active   | 106              | 67                 |
| Inactive | 132              | 420                |

<15nM DefGood in JAK2, 40% error; Random seed = 121783

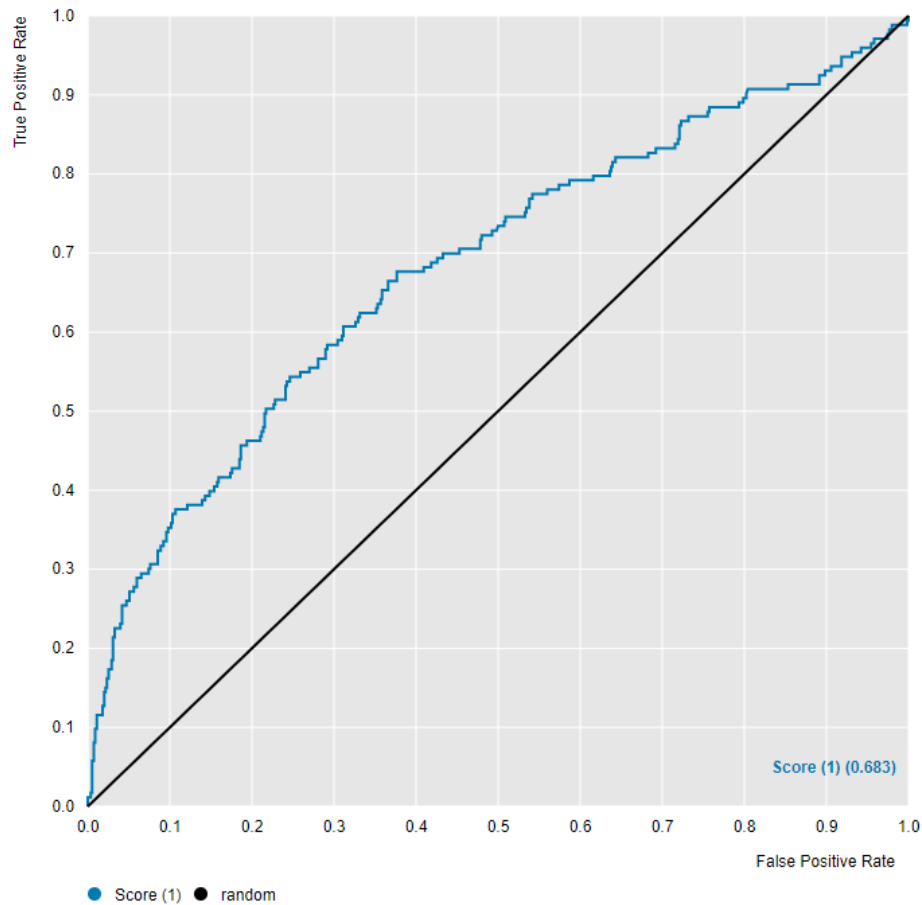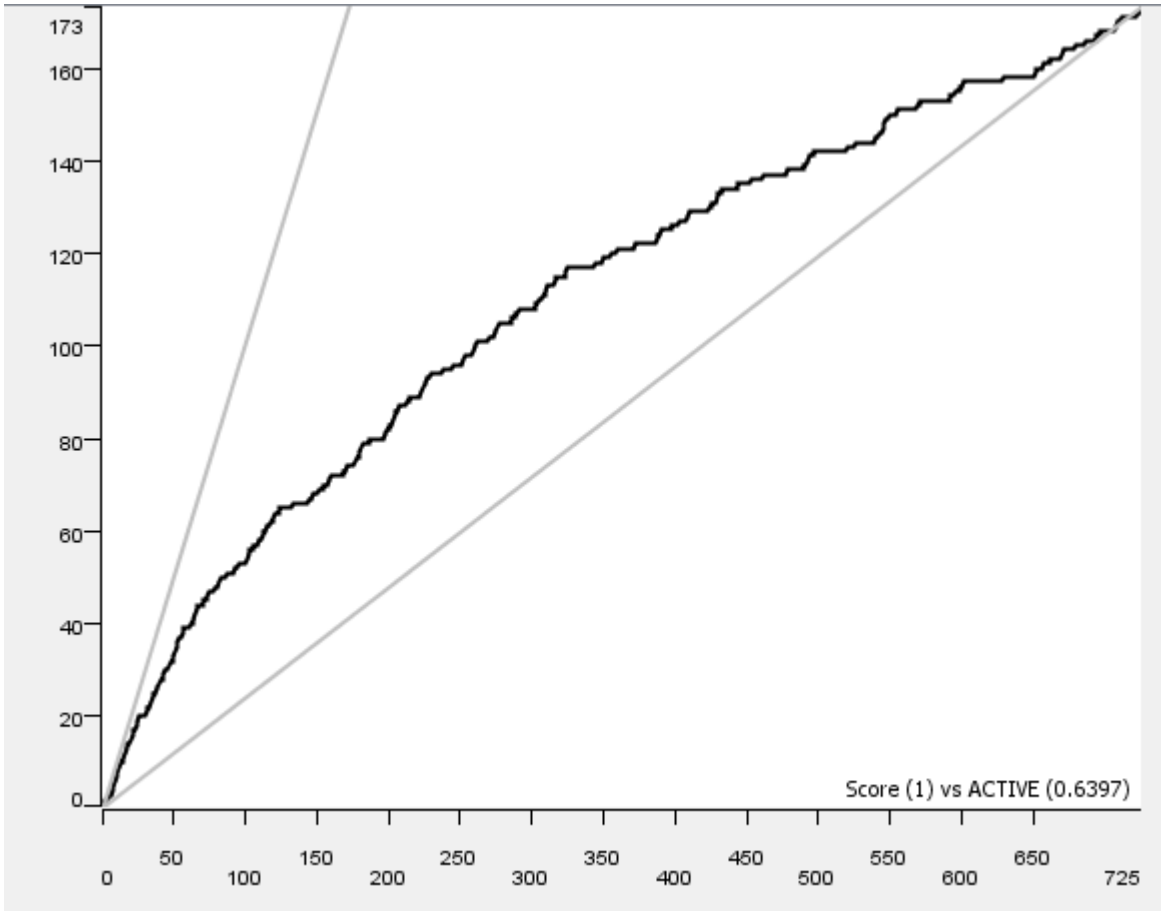

N=725

|                   |        |
|-------------------|--------|
| Top 10% Mean IC50 | 141 nM |
|-------------------|--------|

|          | Predicted Active | Predicted Inactive |
|----------|------------------|--------------------|
| Active   | 95               | 78                 |
| Inactive | 143              | 408                |

# Conclusion - NBN

- An NBN could be generated for JAK2 kinase with a decision value of  $<5$  nM as defined as active. The predictivity of the algorithm could be preserved in three random train/test cycles. The point of failure was 40%, 30% and 40% error.
- Importantly, the split with a random seed of 121783 had a catastrophic mistake from the very beginning without error. Another random seed was used instead

# RF Error Tolerance- <5 nM DefGood in JAK2

- 0-50% absolute error



# RF- <15nM DefGood in JAK2, 10% error

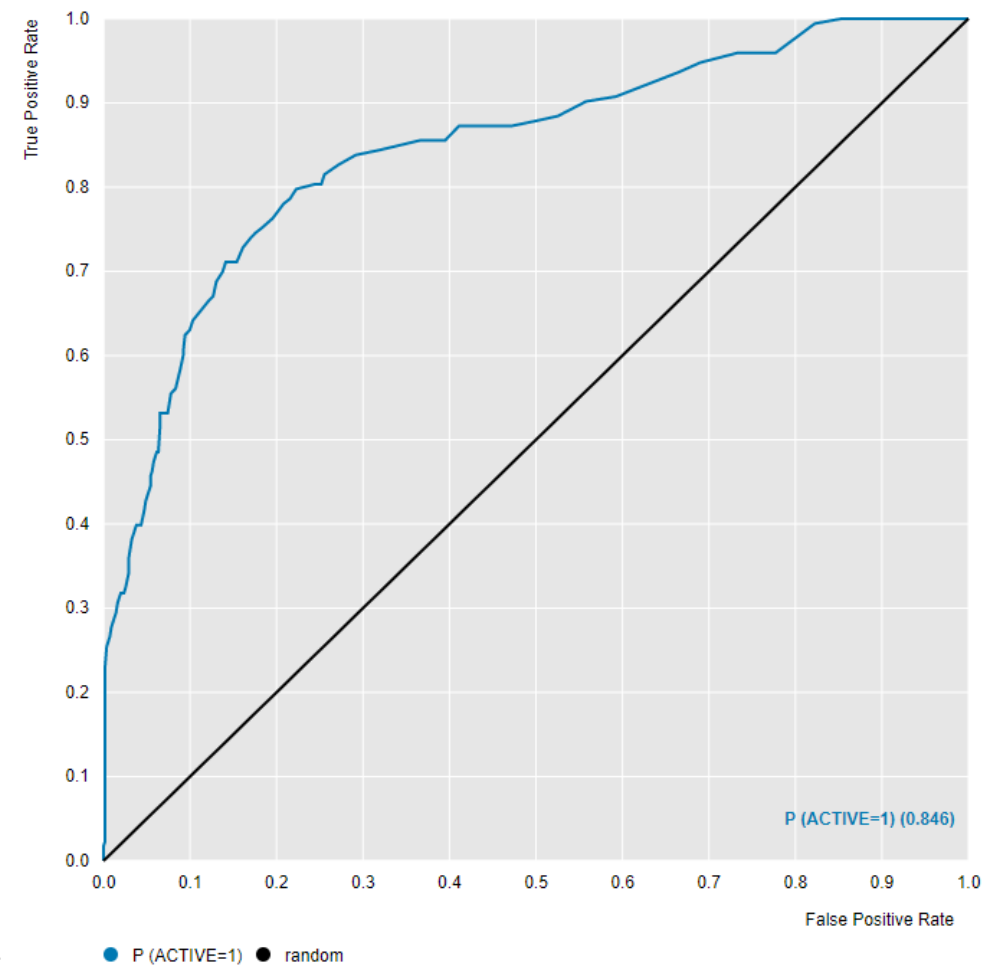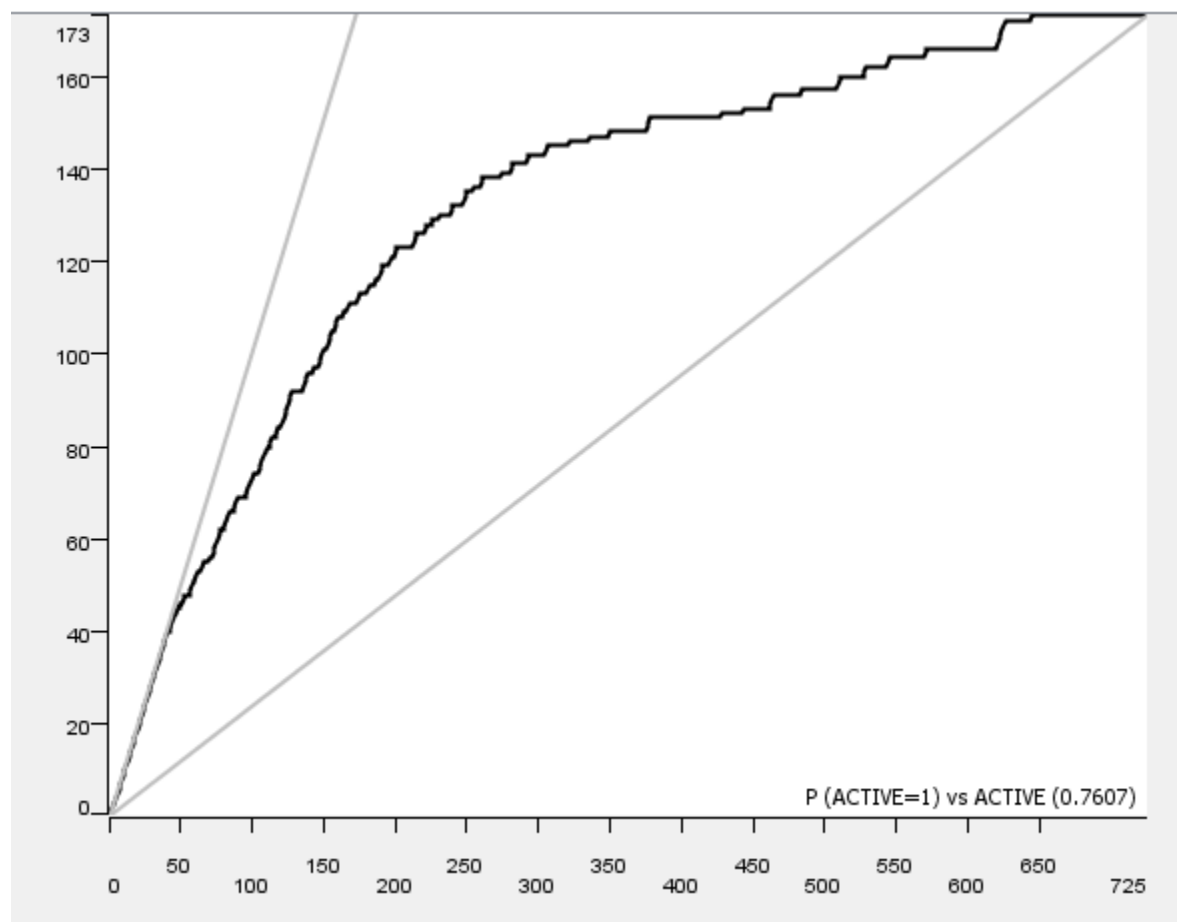

N=725

| Top 10% Mean IC50 | 50.3 nM |
|-------------------|---------|
|-------------------|---------|

|          | Predicted Active | Predicted Inactive |
|----------|------------------|--------------------|
| Active   | 96               | 77                 |
| Inactive | 43               | 509                |

# RF- <15nM DefGood in JAK2, 20% error

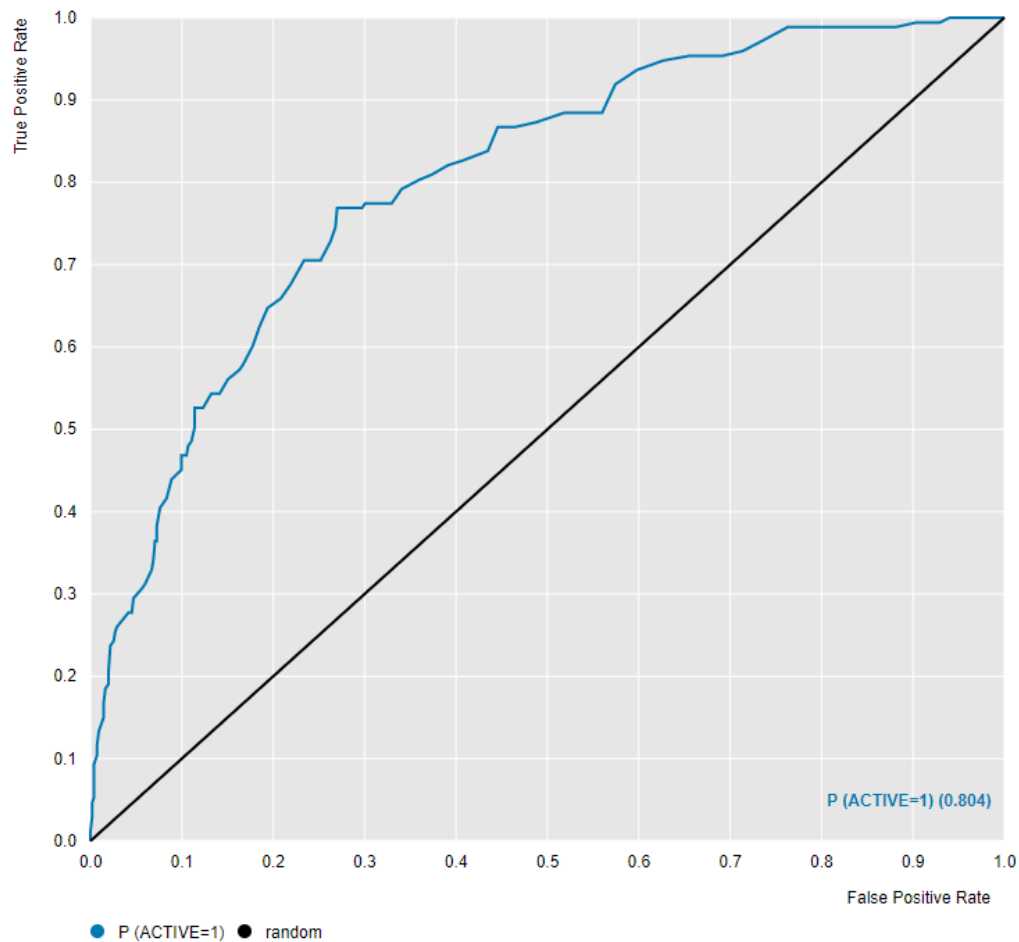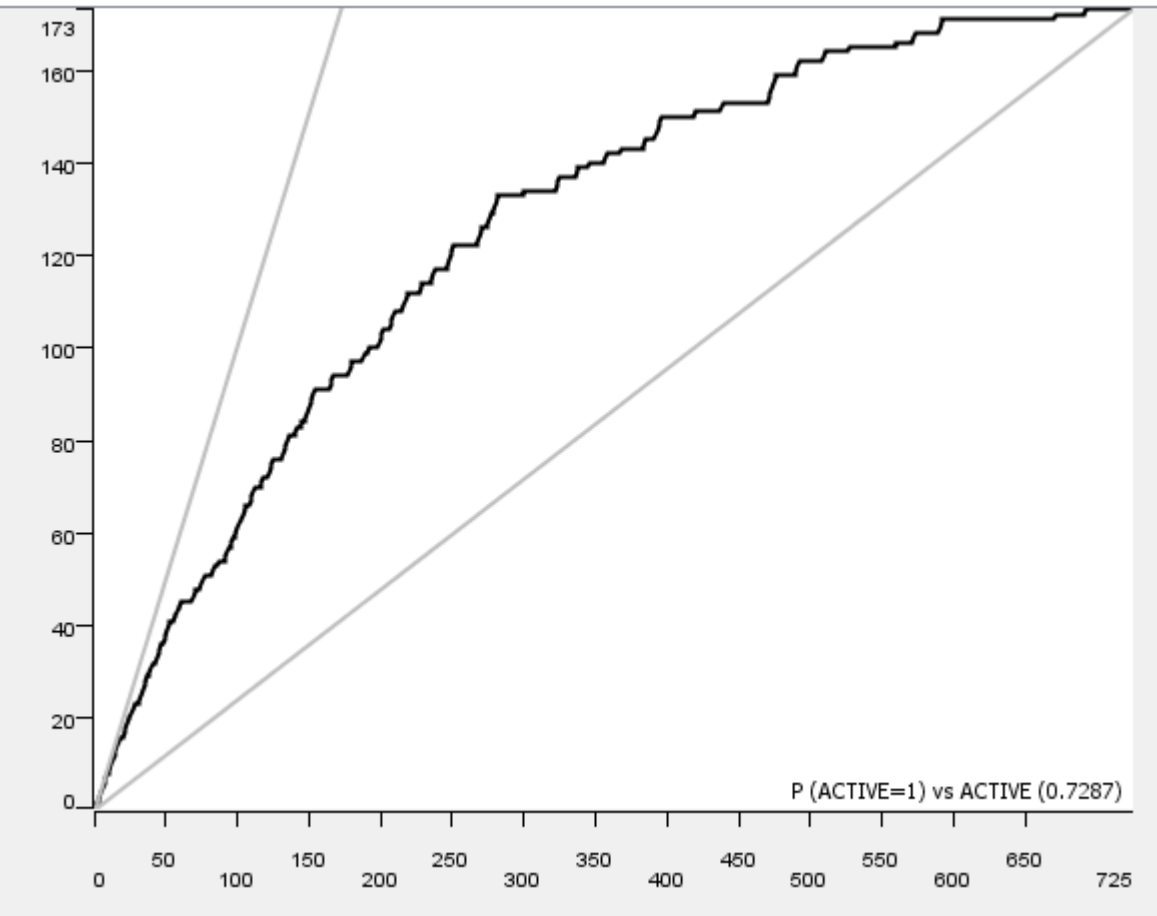

N=725

| Top 10% Mean IC50 | 139 nM |
|-------------------|--------|
|-------------------|--------|

|          | Predicted Active | Predicted Inactive |
|----------|------------------|--------------------|
| Active   | 91               | 82                 |
| Inactive | 63               | 489                |

# RF- <15nM DefGood in JAK2, 25% error

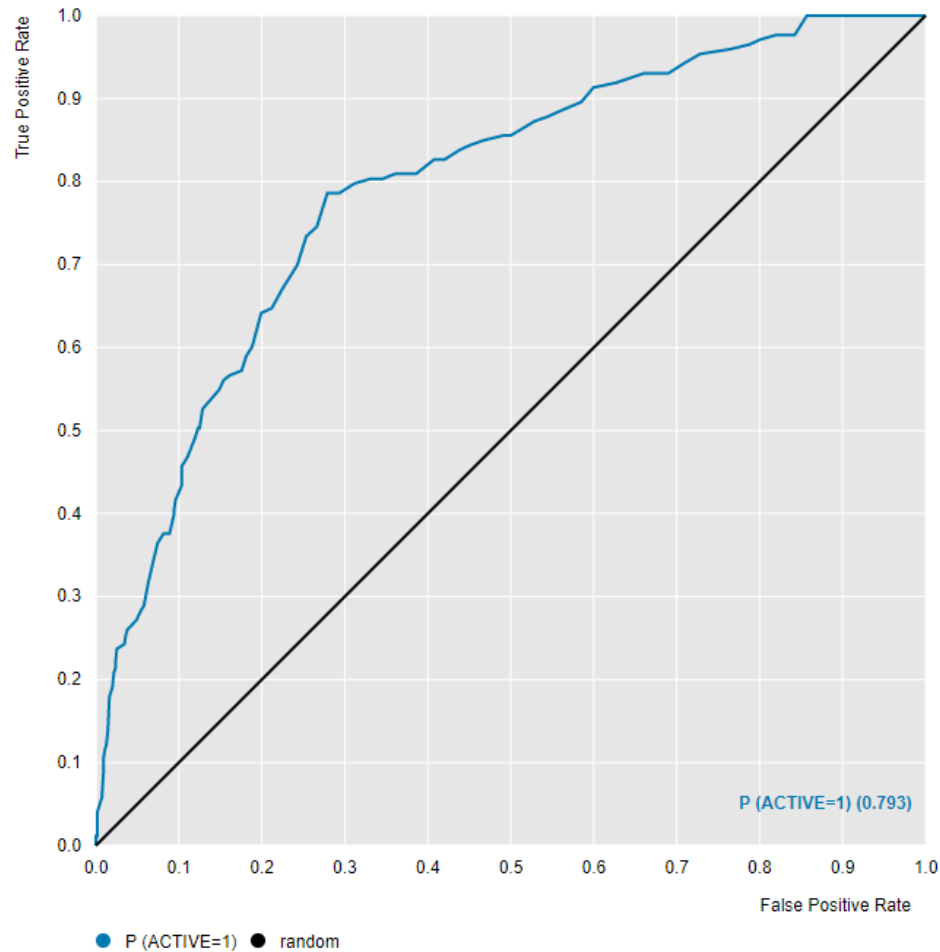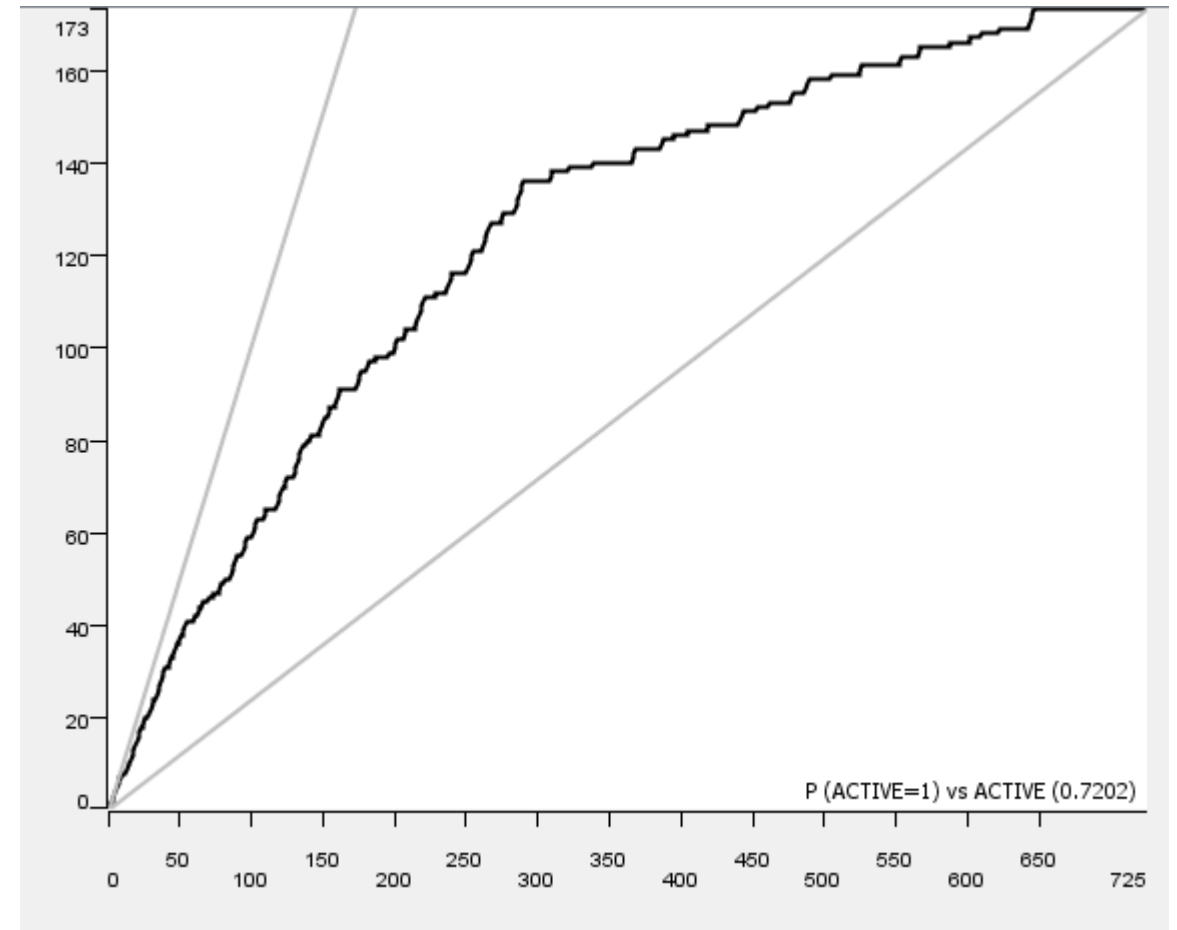

N=725

Top 10% Mean  
IC50

94.8 nM

|          | Predicted Active | Predicted Inactive |
|----------|------------------|--------------------|
| Active   | 95               | 78                 |
| Inactive | 82               | 470                |

# RF- <15nM DefGood in JAK2, 30% error

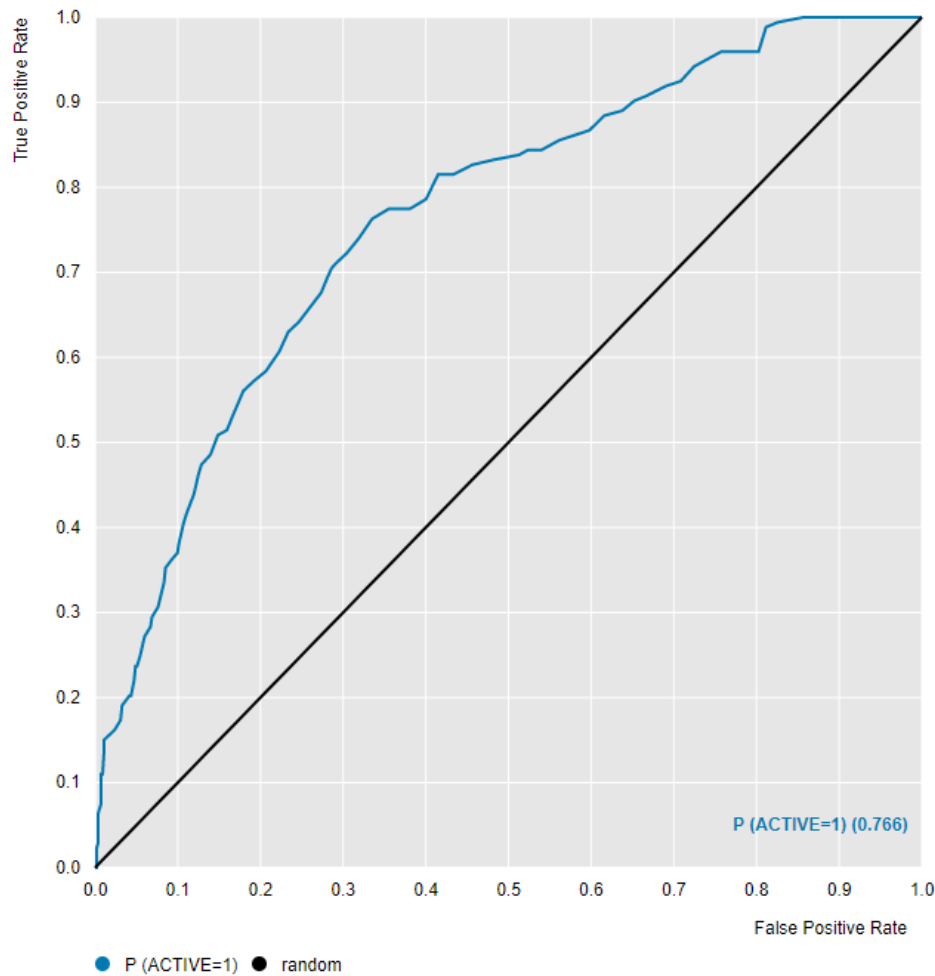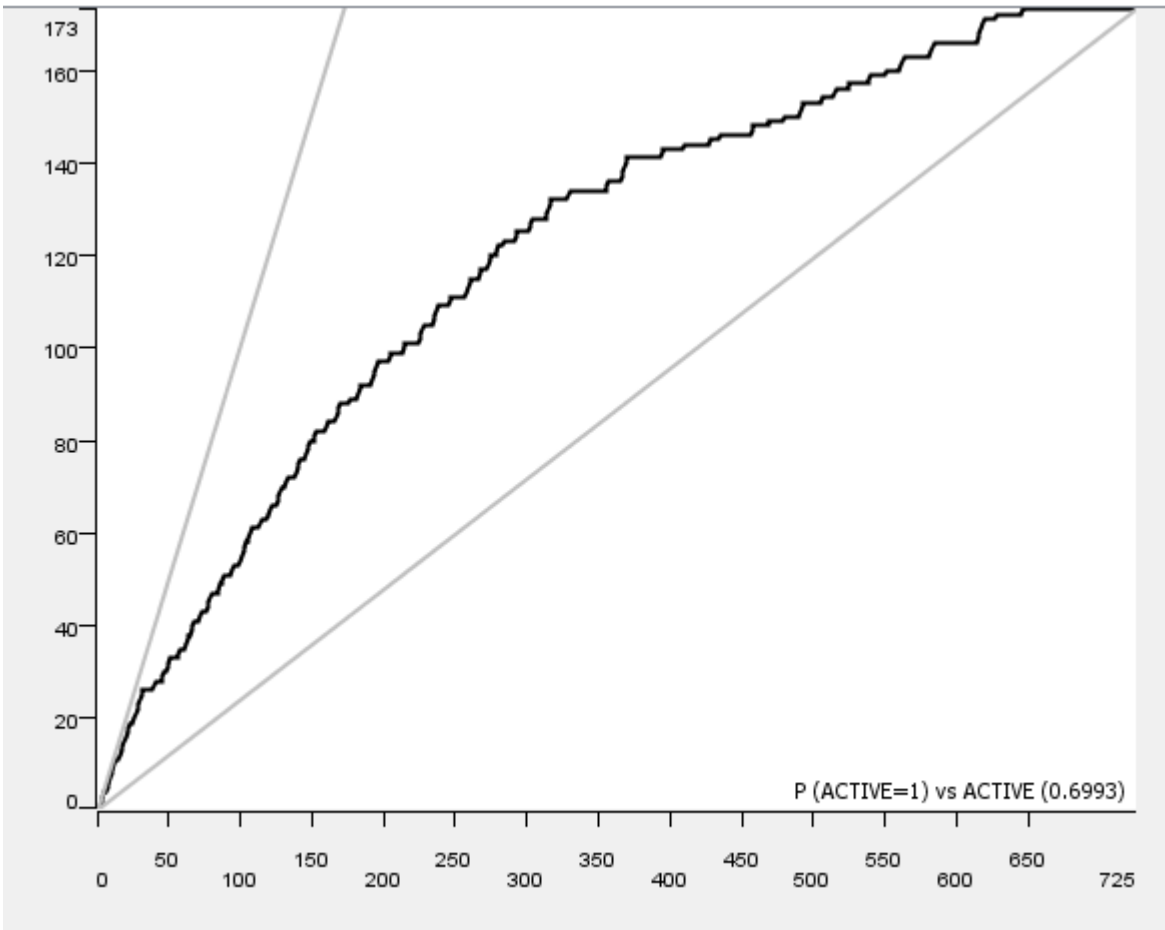

N=725

| Top 10% Mean IC50 | 231 nM |
|-------------------|--------|
|-------------------|--------|

|          | Predicted Active | Predicted Inactive |
|----------|------------------|--------------------|
| Active   | 97               | 76                 |
| Inactive | 99               | 453                |

# RF- <15nM DefGood in JAK2, 35% error

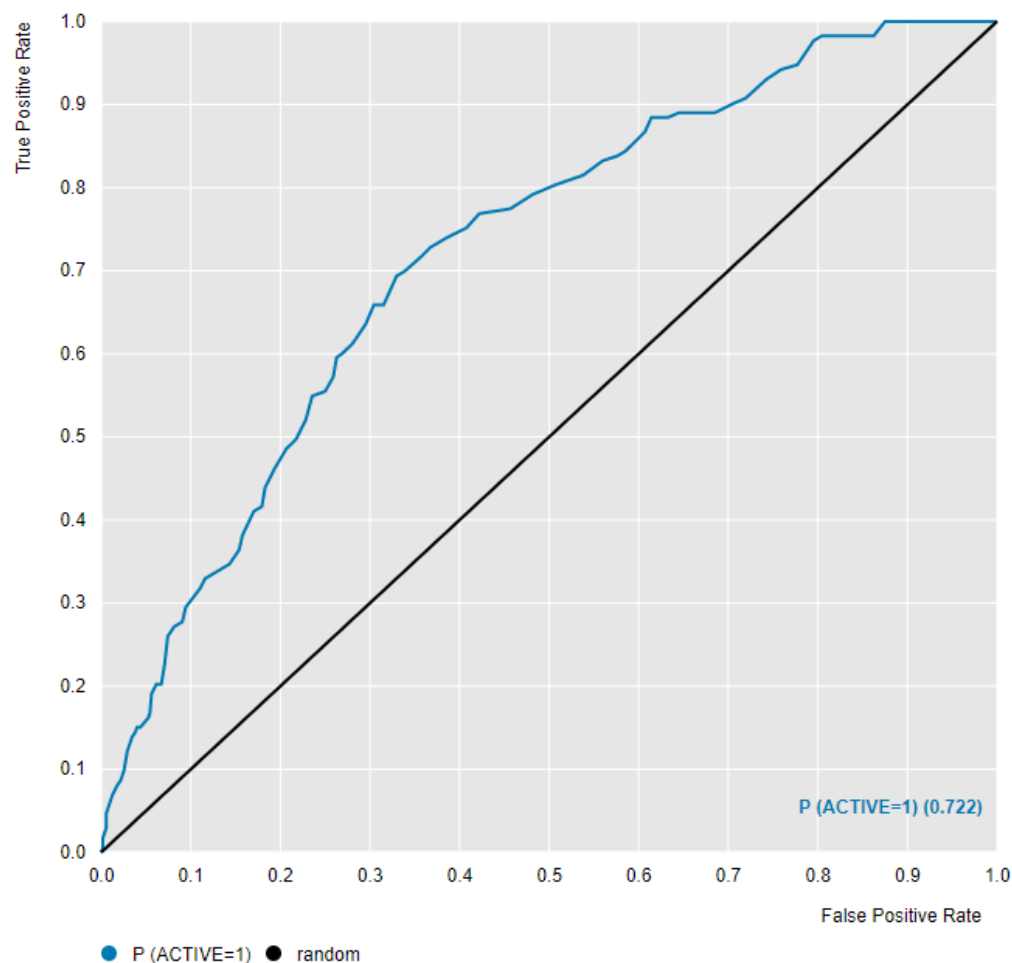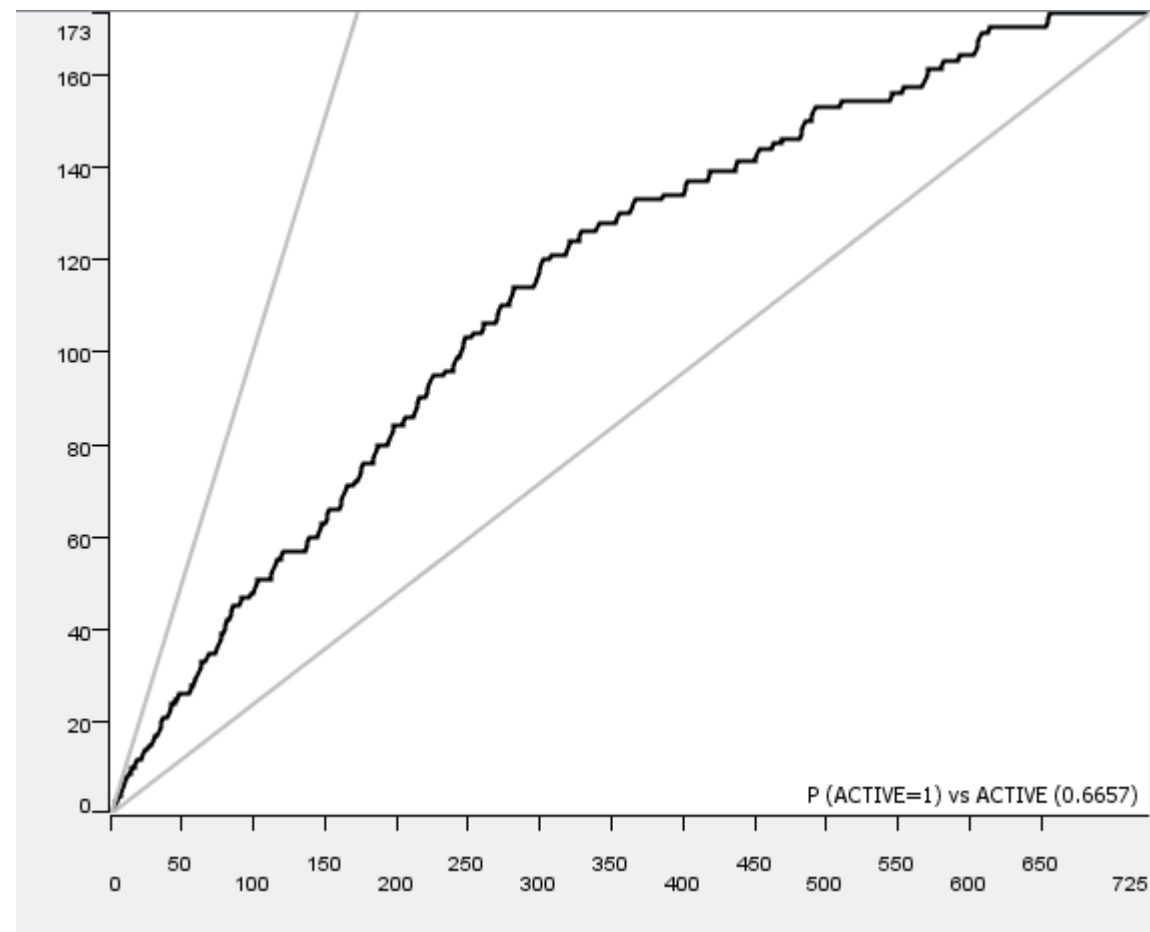

N=725

Top 10% Mean  
IC50

264 nM

|          | Predicted Active | Predicted Inactive |
|----------|------------------|--------------------|
| Active   | 99               | 74                 |
| Inactive | 143              | 409                |

# RF- <15nM DefGood in JAK2, 40% error

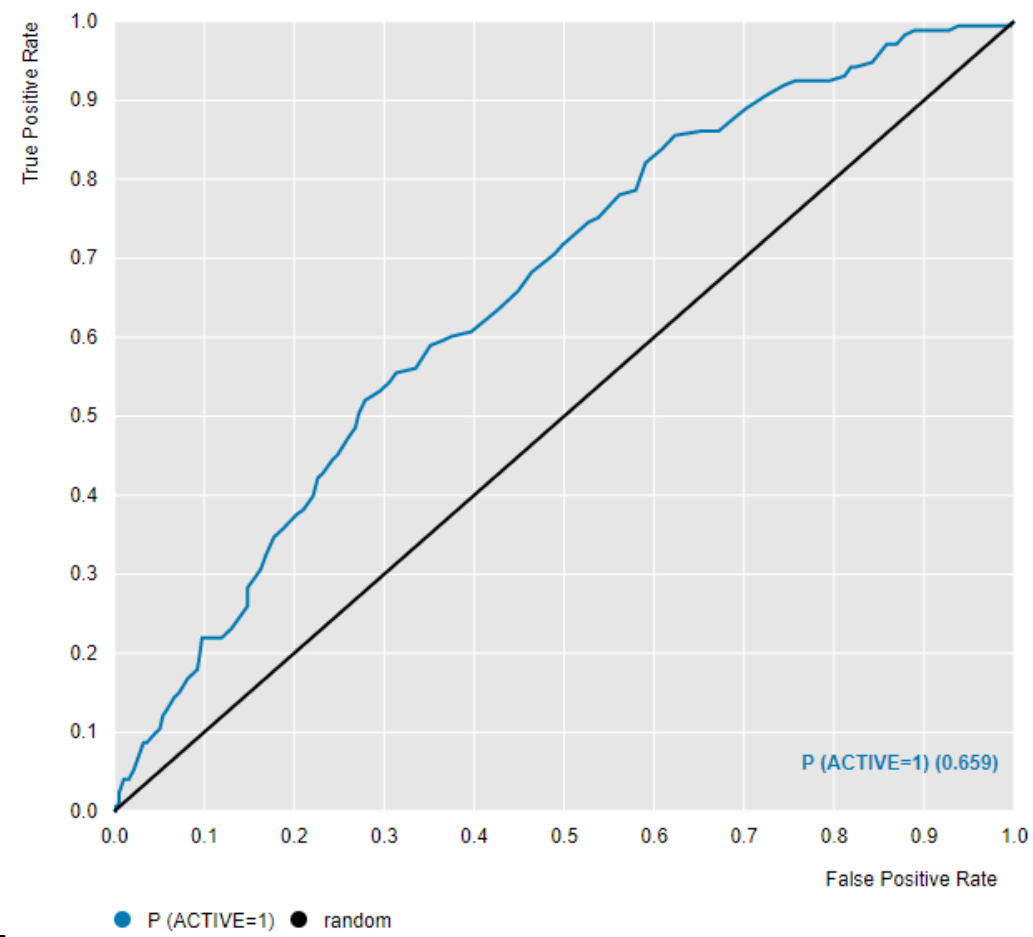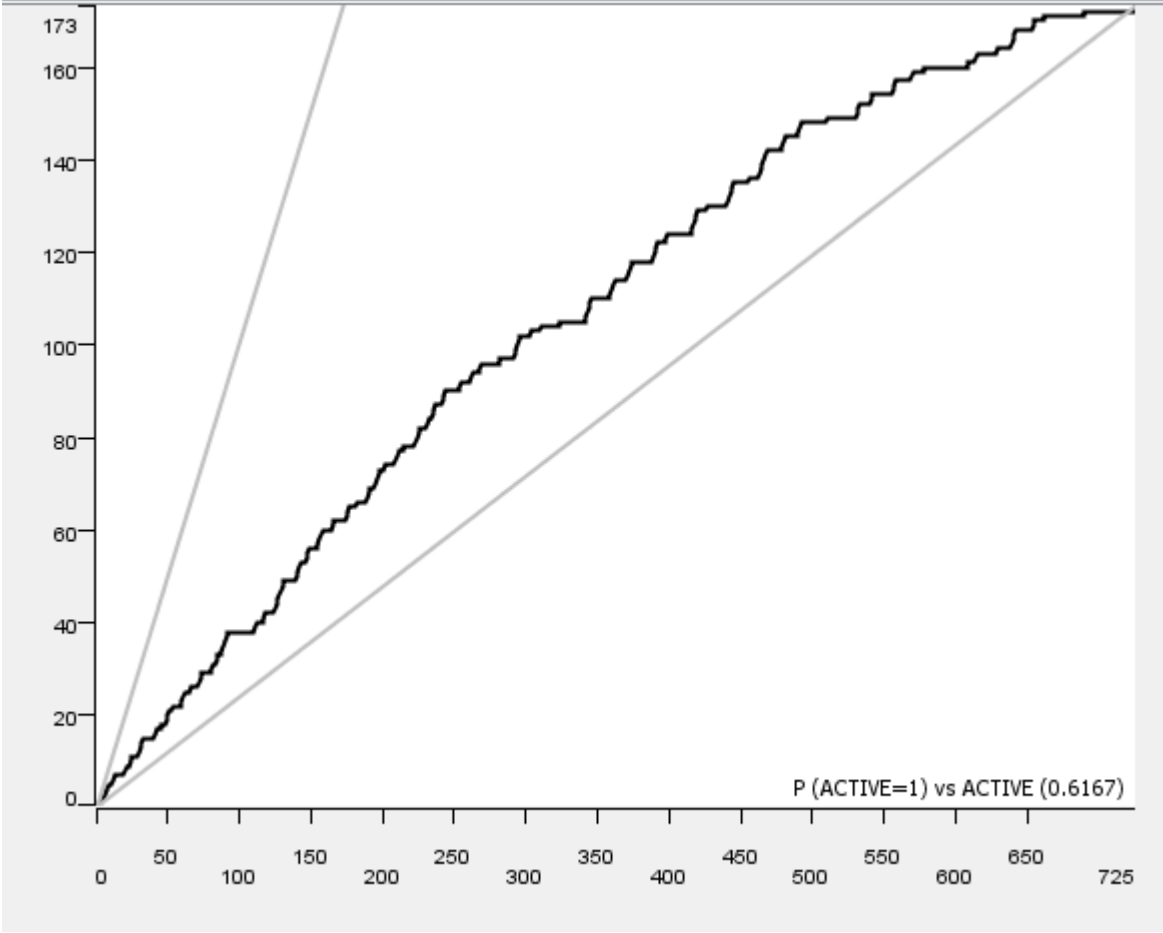

N=725

|                   |          |
|-------------------|----------|
| Top 10% Mean IC50 | 266.8 nM |
|-------------------|----------|

|          | Predicted Active | Predicted Inactive |
|----------|------------------|--------------------|
| Active   | 90               | 83                 |
| Inactive | 154              | 398                |

<15nM DefGood in JAK2, 10% error; Random seed = 429

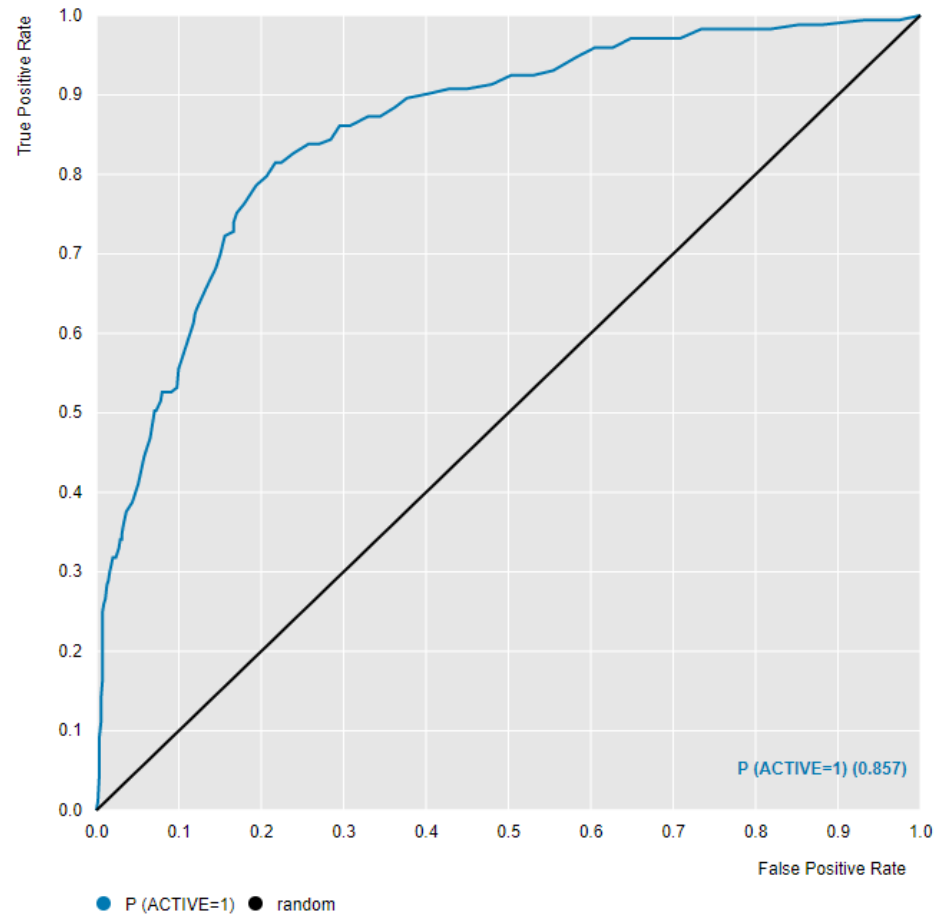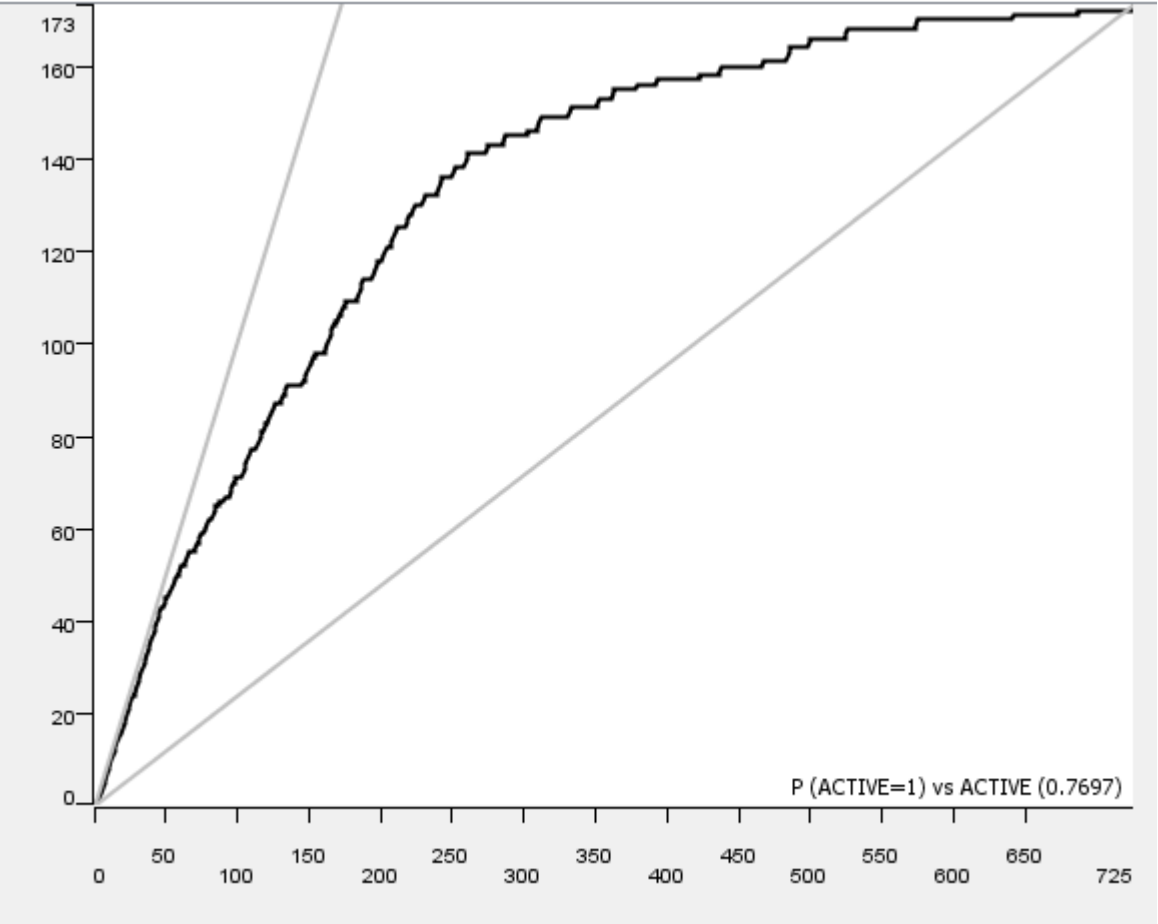

N=725

|                   |       |
|-------------------|-------|
| Top 10% Mean IC50 | 52 nM |
|-------------------|-------|

|          | Predicted Active | Predicted Inactive |
|----------|------------------|--------------------|
| Active   | 91               | 82                 |
| Inactive | 50               | 502                |

<15nM DefGood in JAK2, 15% error; Random  
seed = 429

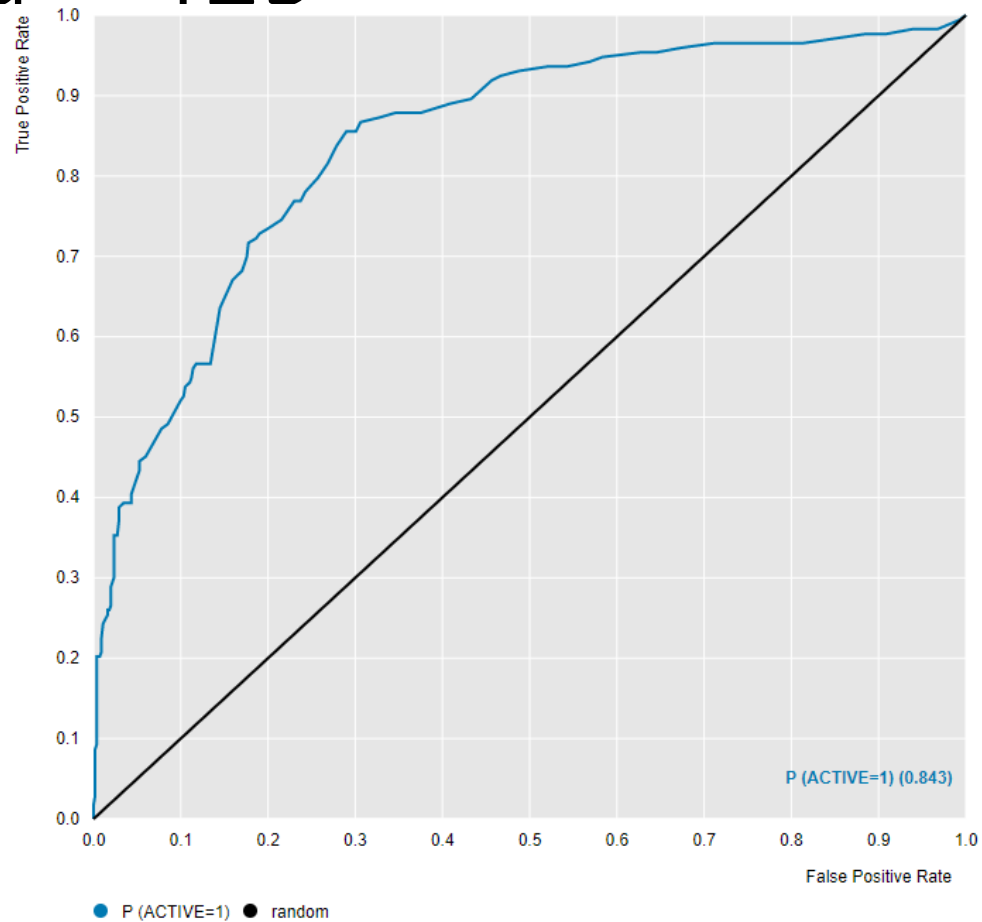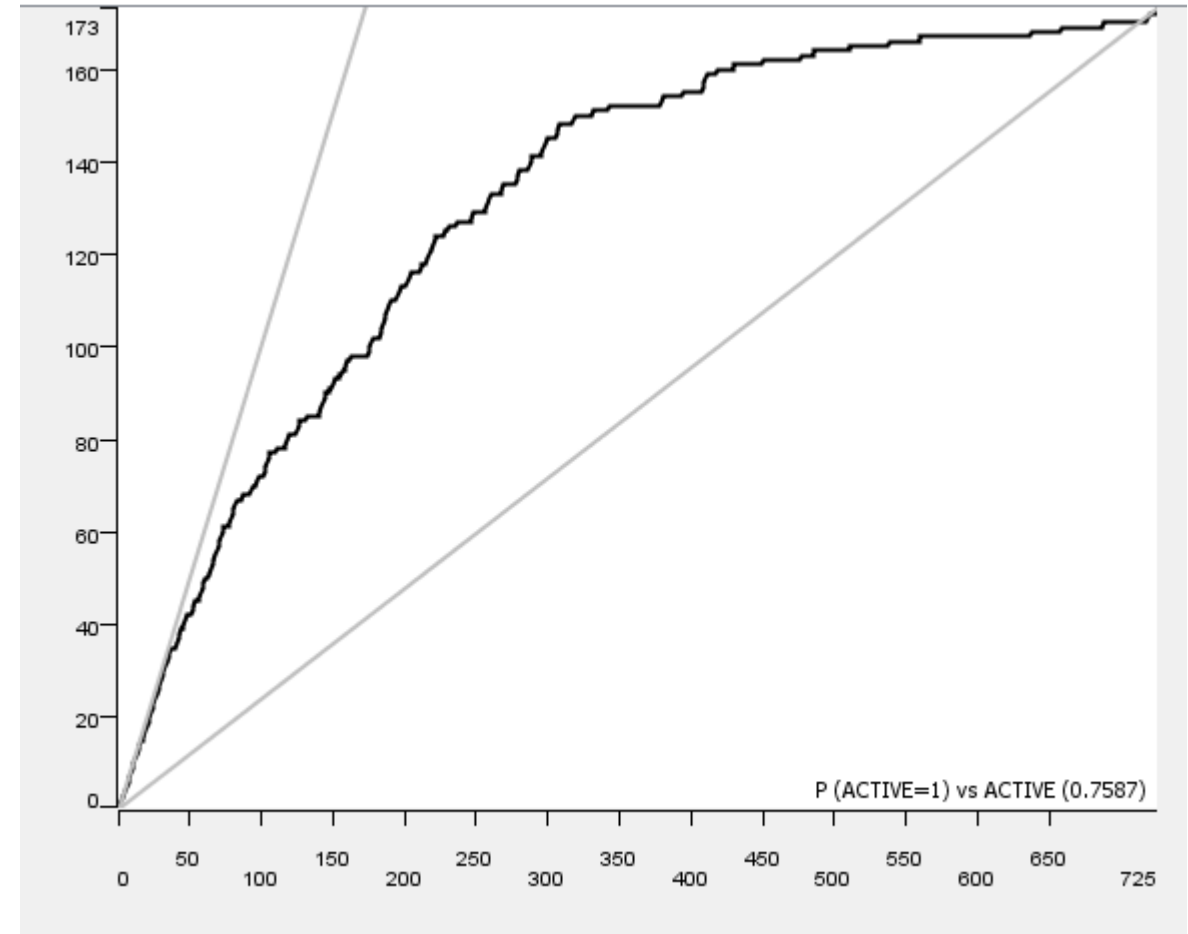

N=725

| Top 10% Mean<br>IC50 | 34.0 nM |
|----------------------|---------|
|----------------------|---------|

|          | Predicted Active | Predicted Inactive |
|----------|------------------|--------------------|
| Active   | 94               | 79                 |
| Inactive | 61               | 491                |



<15nM DefGood in JAK2, 20% error; Random seed = 429

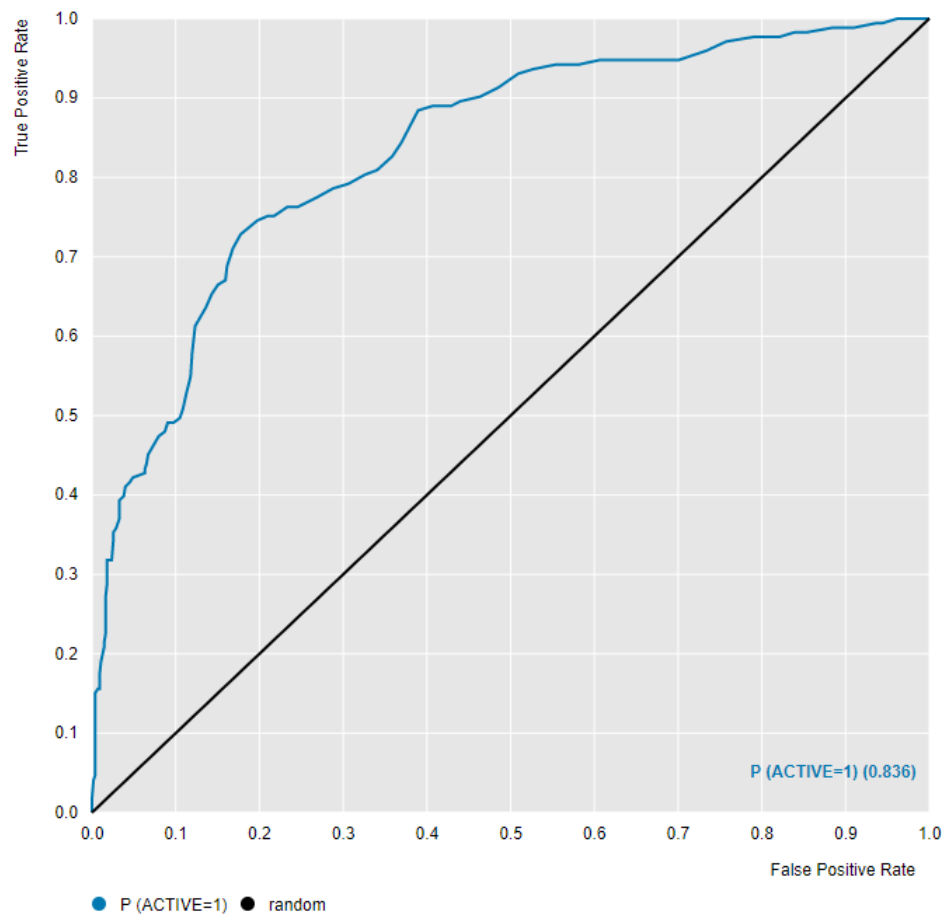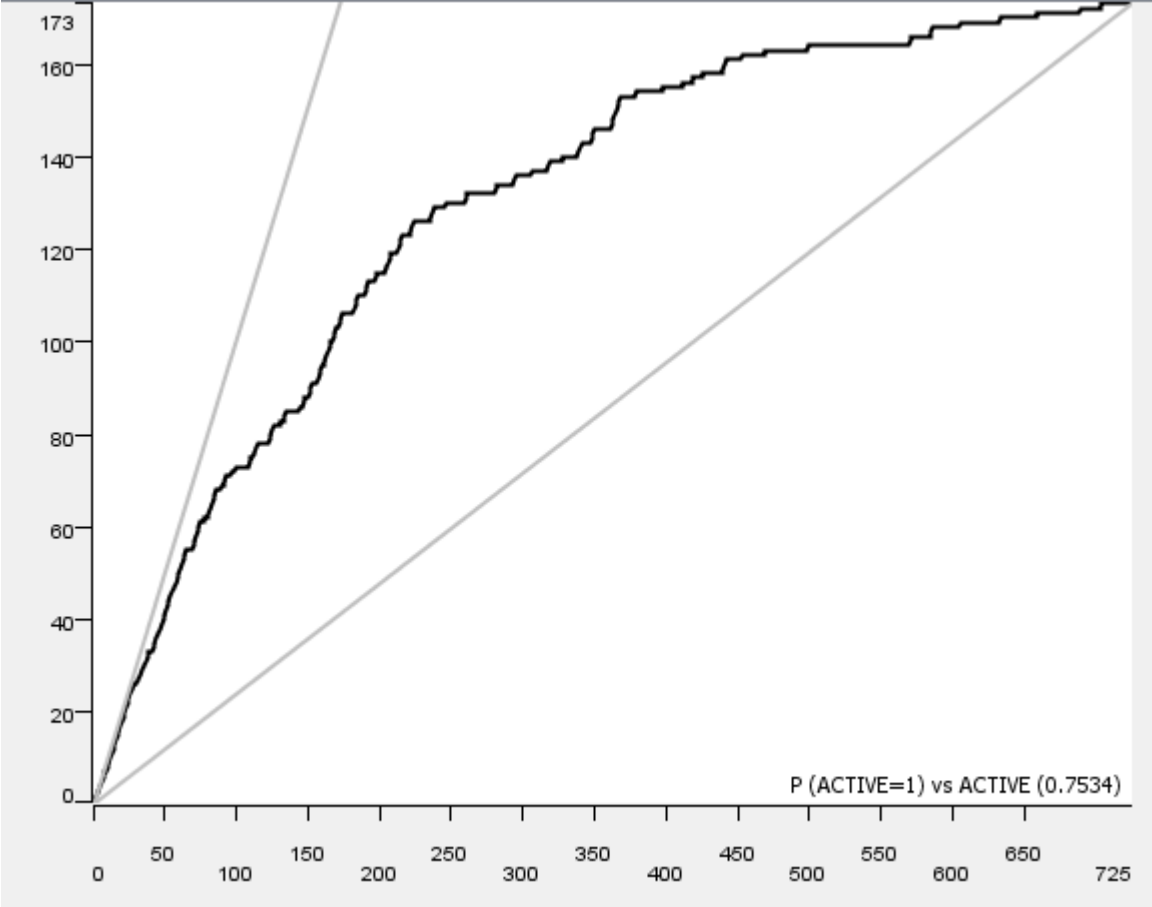

N=725

|                   |         |
|-------------------|---------|
| Top 10% Mean IC50 | 46.8 nM |
|-------------------|---------|

|          | Predicted Active | Predicted Inactive |
|----------|------------------|--------------------|
| Active   | 95               | 78                 |
| Inactive | 65               | 487                |

<15nM DefGood in JAK2, 30% error; Random seed = 429

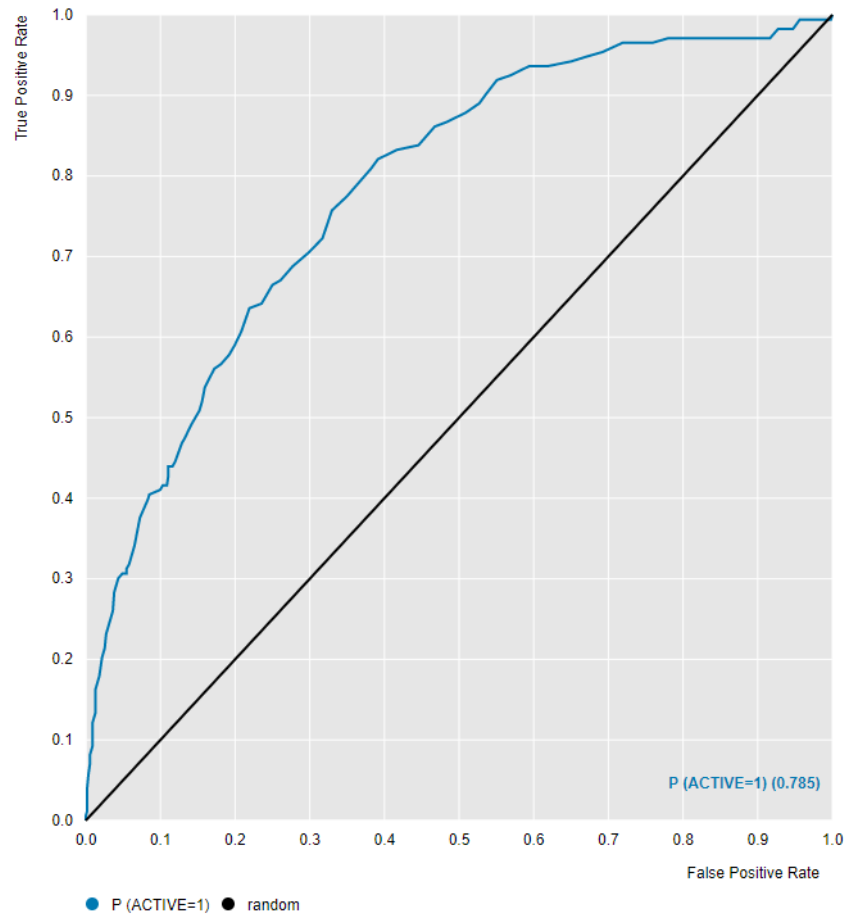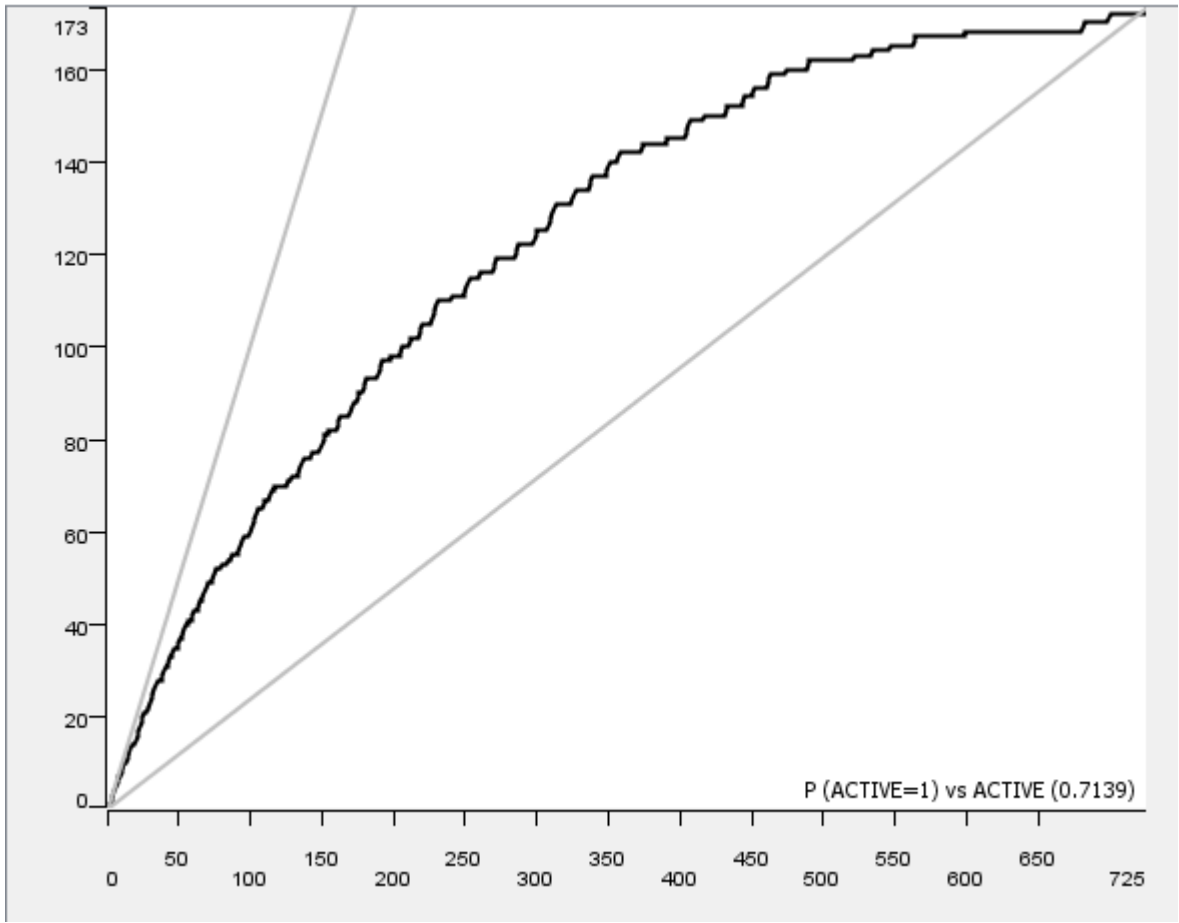

N=725

|                   |          |
|-------------------|----------|
| Top 10% Mean IC50 | 2,300 nM |
|-------------------|----------|

|          | Predicted Active | Predicted Inactive |
|----------|------------------|--------------------|
| Active   | 97               | 76                 |
| Inactive | 95               | 457                |

<15nM DefGood in JAK2, 10% error; Random seed = 121783

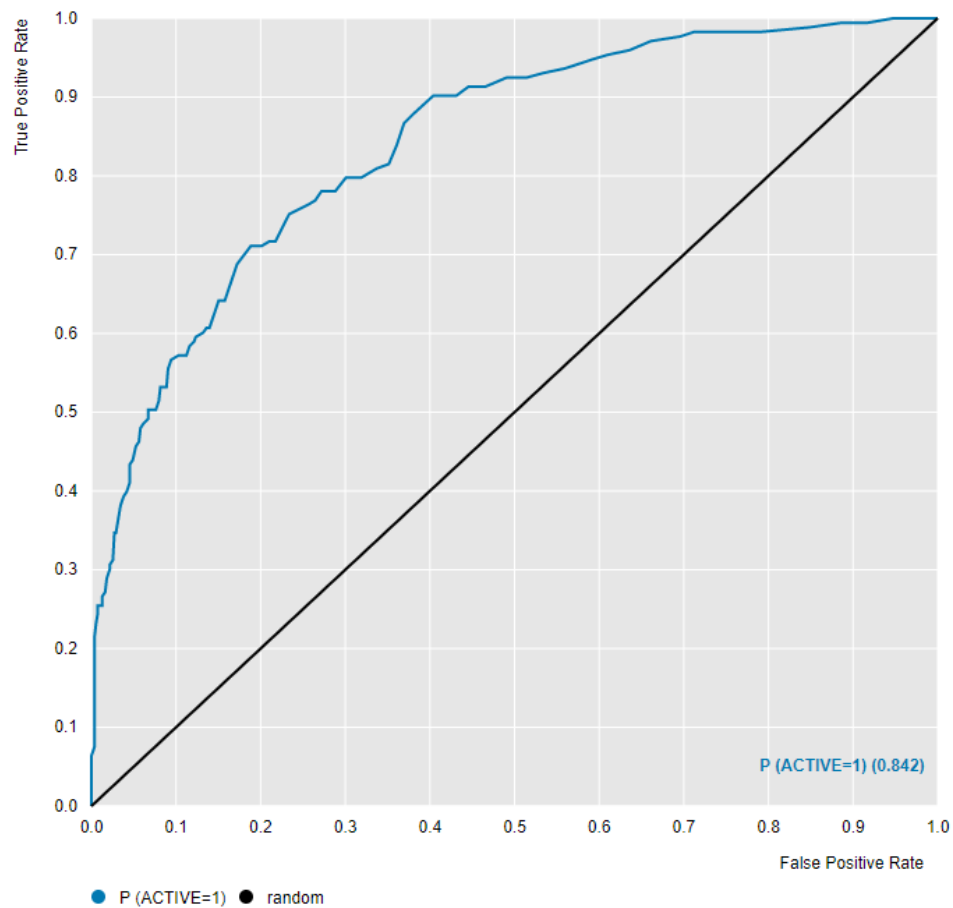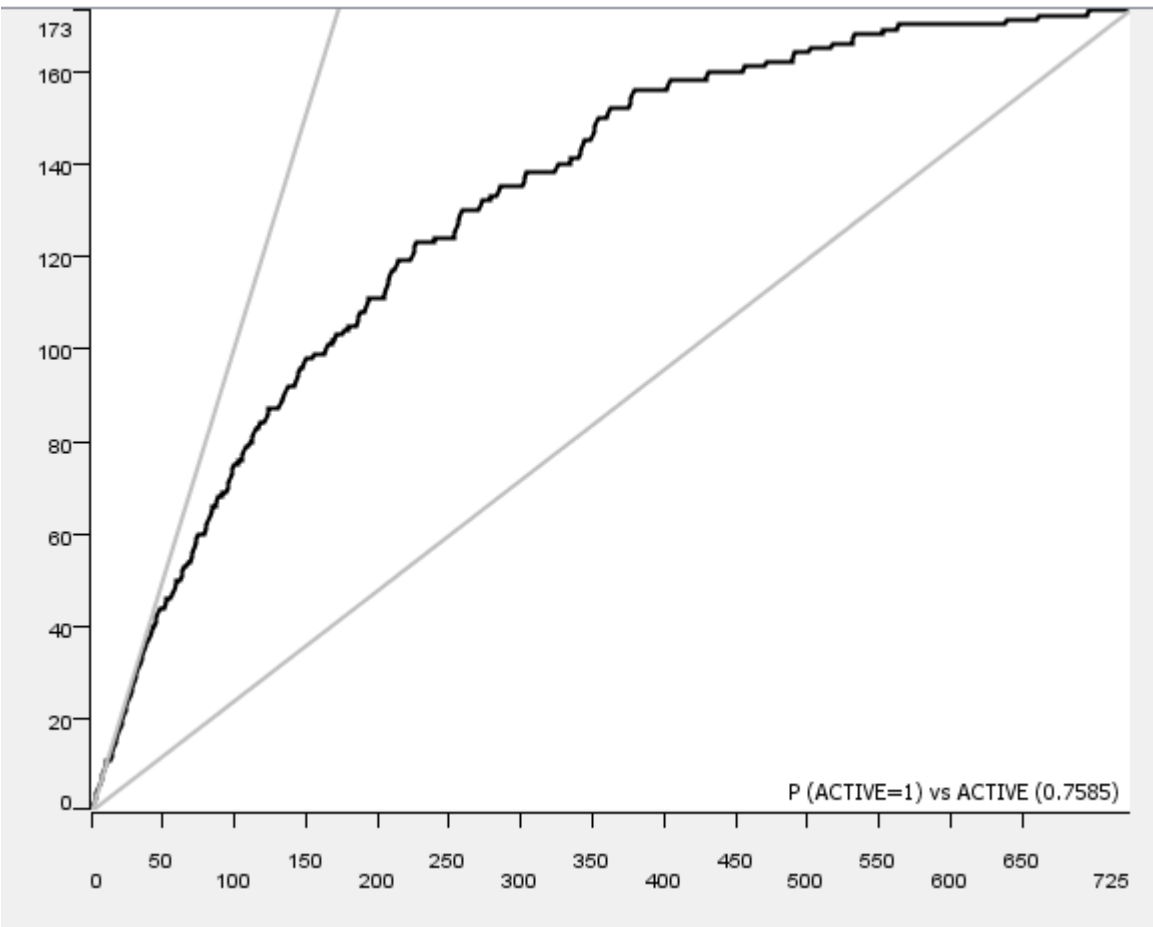

N=725

|                   |        |
|-------------------|--------|
| Top 10% Mean IC50 | 454 nM |
|-------------------|--------|

|          | Predicted Active | Predicted Inactive |
|----------|------------------|--------------------|
| Active   | 98               | 75                 |
| Inactive | 52               | 500                |

<15nM DefGood in JAK2, 20% error; Random seed = 121783

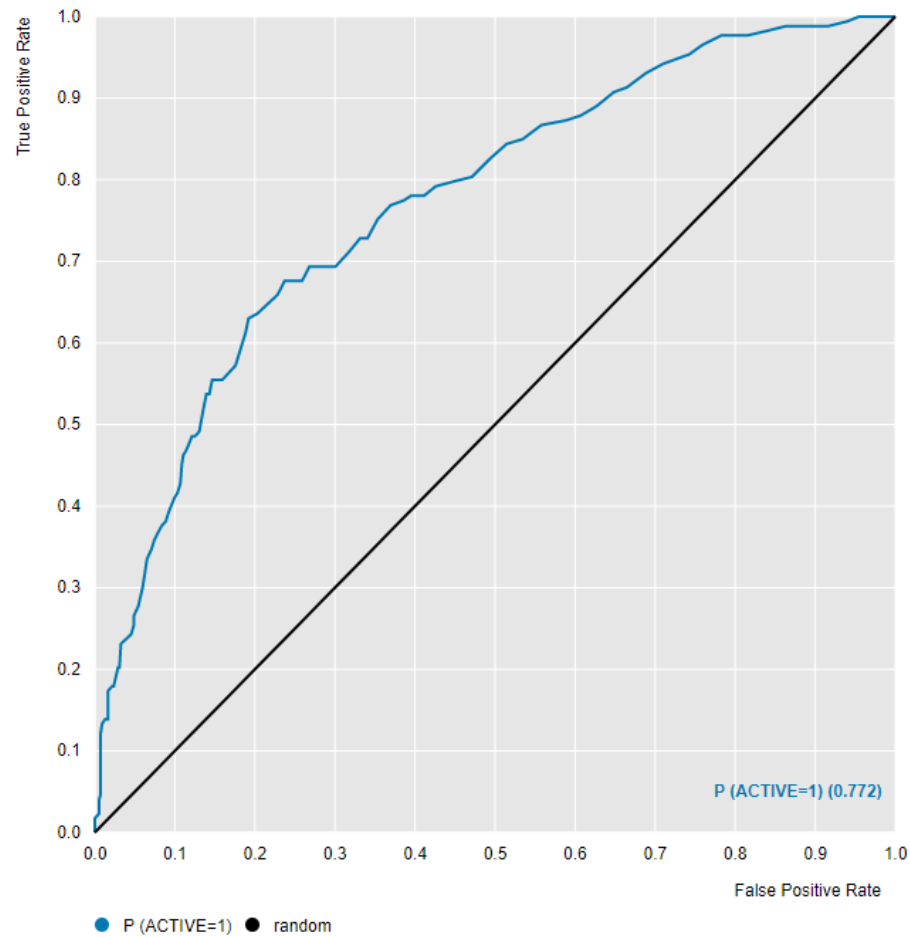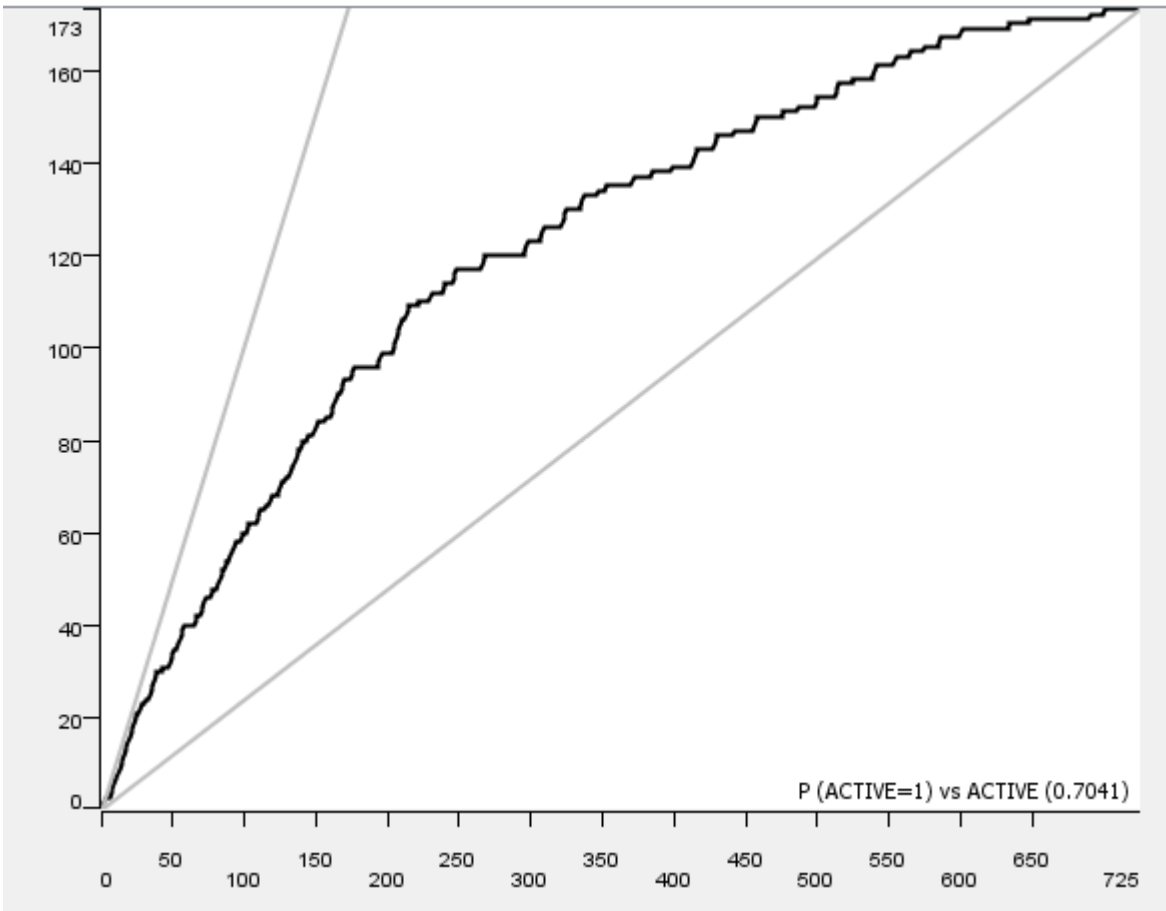

N=725

|                   |        |
|-------------------|--------|
| Top 10% Mean IC50 | 653 nM |
|-------------------|--------|

|          | Predicted Active | Predicted Inactive |
|----------|------------------|--------------------|
| Active   | 90               | 83                 |
| Inactive | 75               | 477                |

<15nM DefGood in JAK2, 30% error; Random seed = 121783

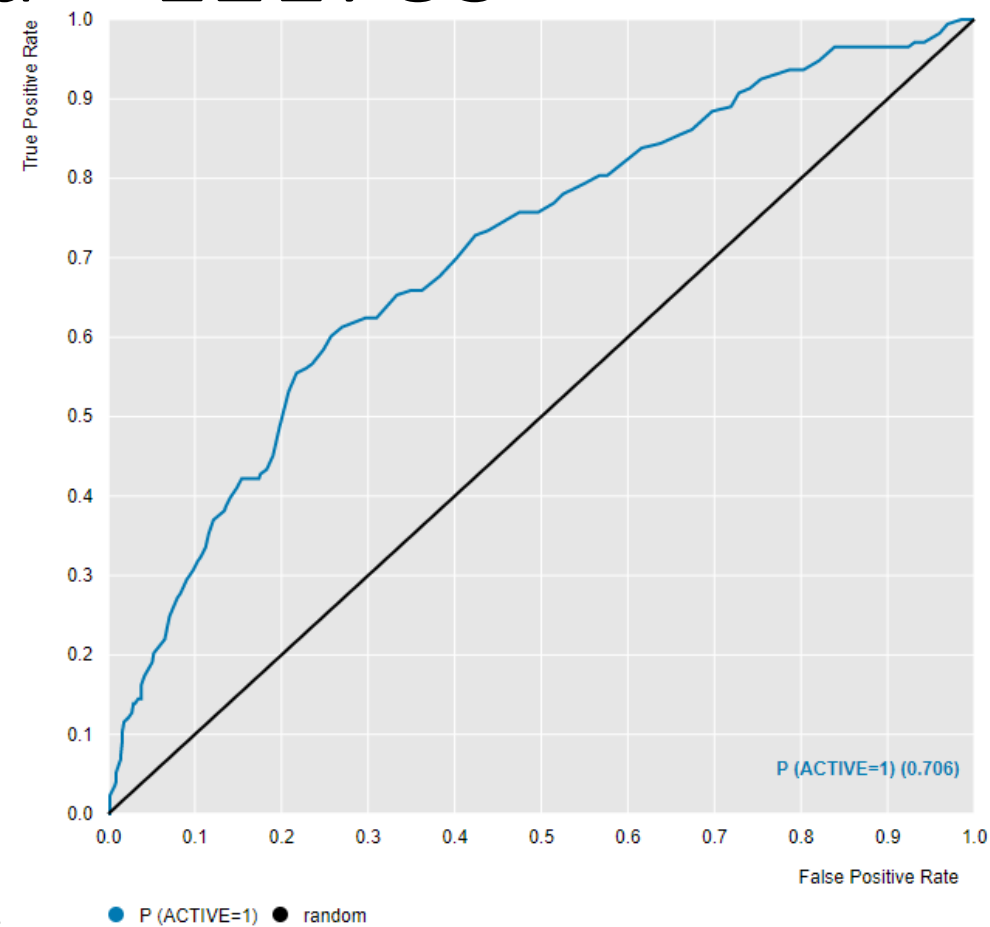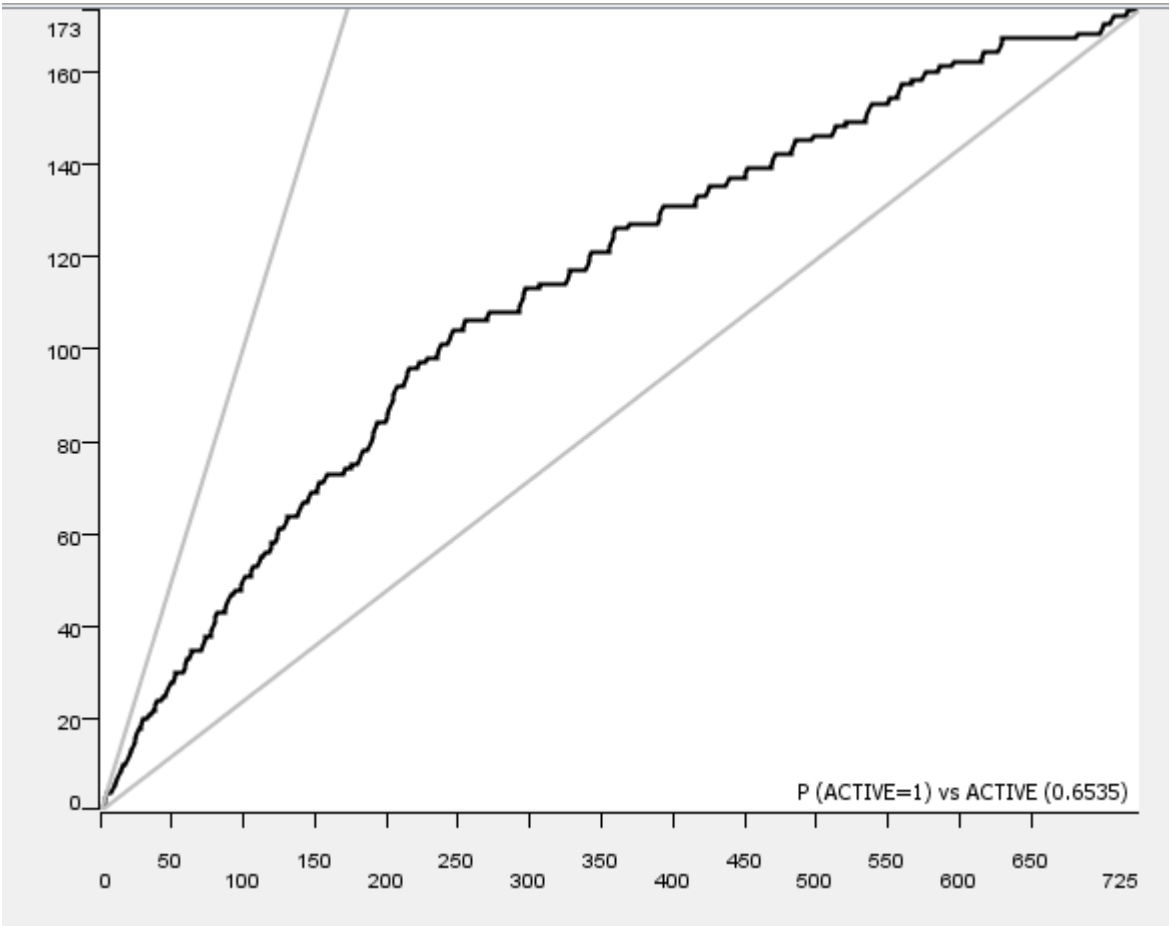

N=725

|                   |        |
|-------------------|--------|
| Top 10% Mean IC50 | 563 nM |
|-------------------|--------|

|          | Predicted Active | Predicted Inactive |
|----------|------------------|--------------------|
| Active   | 84               | 89                 |
| Inactive | 109              | 443                |

<15nM DefGood in JAK2, 35% error; Random seed = 121783

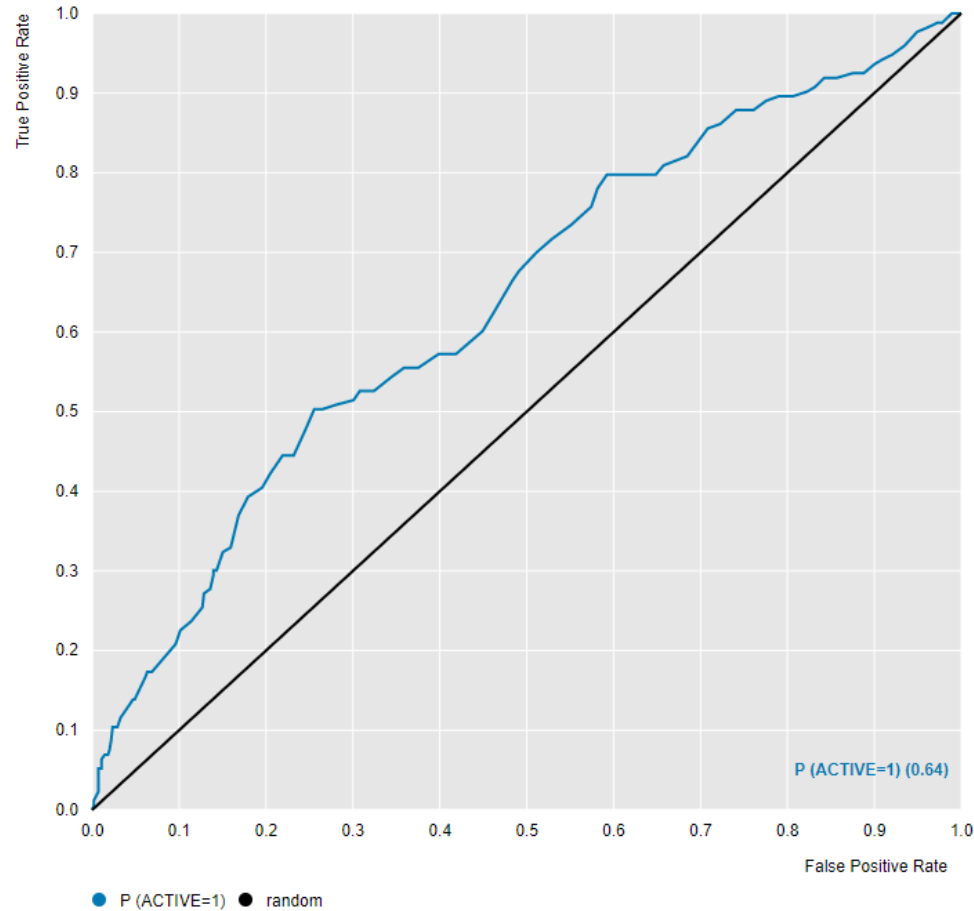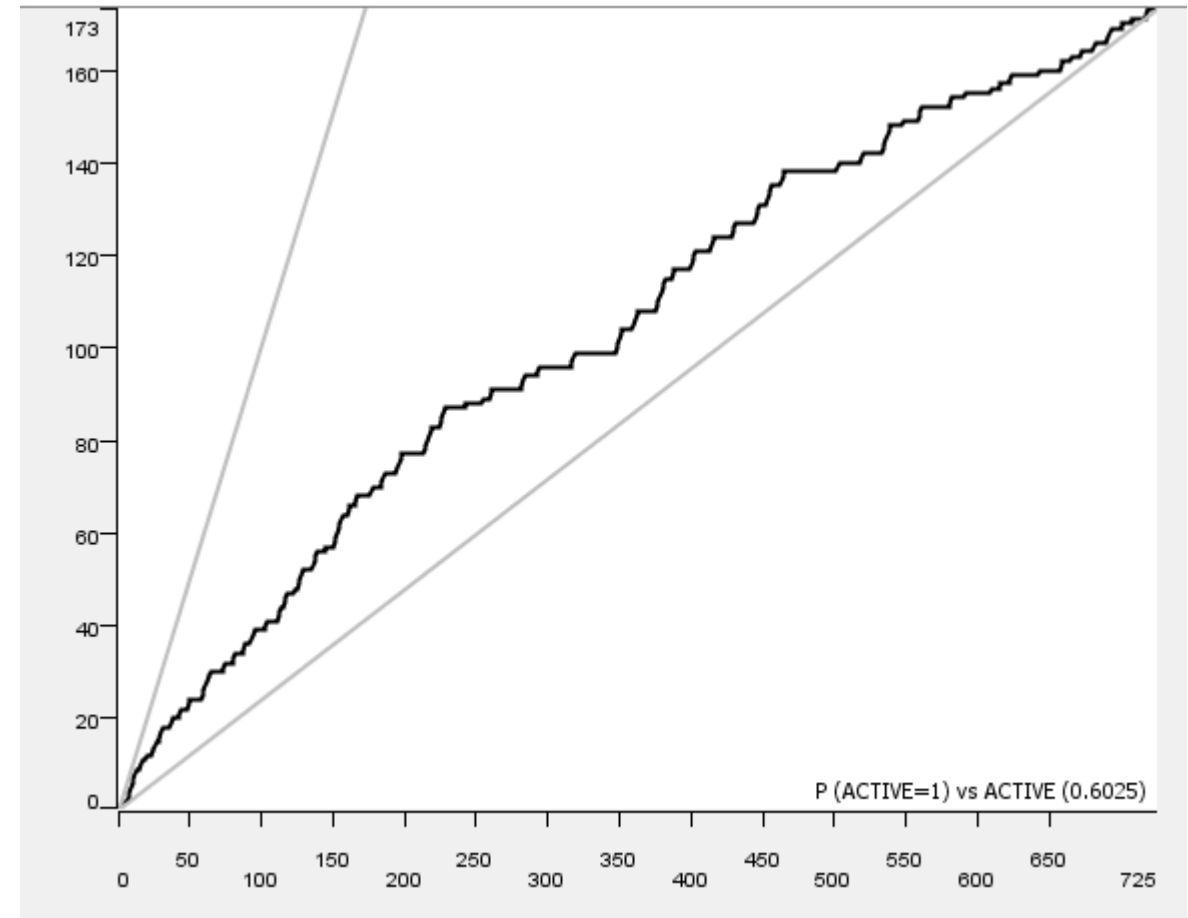

N=725

| Top 10% Mean IC50 | 743 nM |
|-------------------|--------|
|-------------------|--------|

|          | Predicted Active | Predicted Inactive |
|----------|------------------|--------------------|
| Active   | 87               | 86                 |
| Inactive | 141              | 411                |

# Conclusion - RF

- A Random Forrest could be generated for JAK2 kinase with a decision value of  $<15$  nM as defined as active. The predictivity of the algorithm could be preserved in three random train/test cycles as error was introduced in the training set. The point of failure was 40%, 30% and 35% error.

# Conclusion - PNN

- PNN failed in the control phase



MEK1

# MEK1 NBN Design

- Rules -  $\$RELATION\$ = "="$  OR  $\$IC50\$ > 999$  OR  $\$IC50\$ < 10 \Rightarrow TRUE$
- Sort ascending and remove duplicates
- DefGood scanned between 5 and 50 nM
- 80-20 split for both actives and inactives
- NBN – ECFP4 used Classifier where Prediction was Active = True
- Resulted in 823 compounds after cleaning the data

# <5 nM DefGood in MEK1

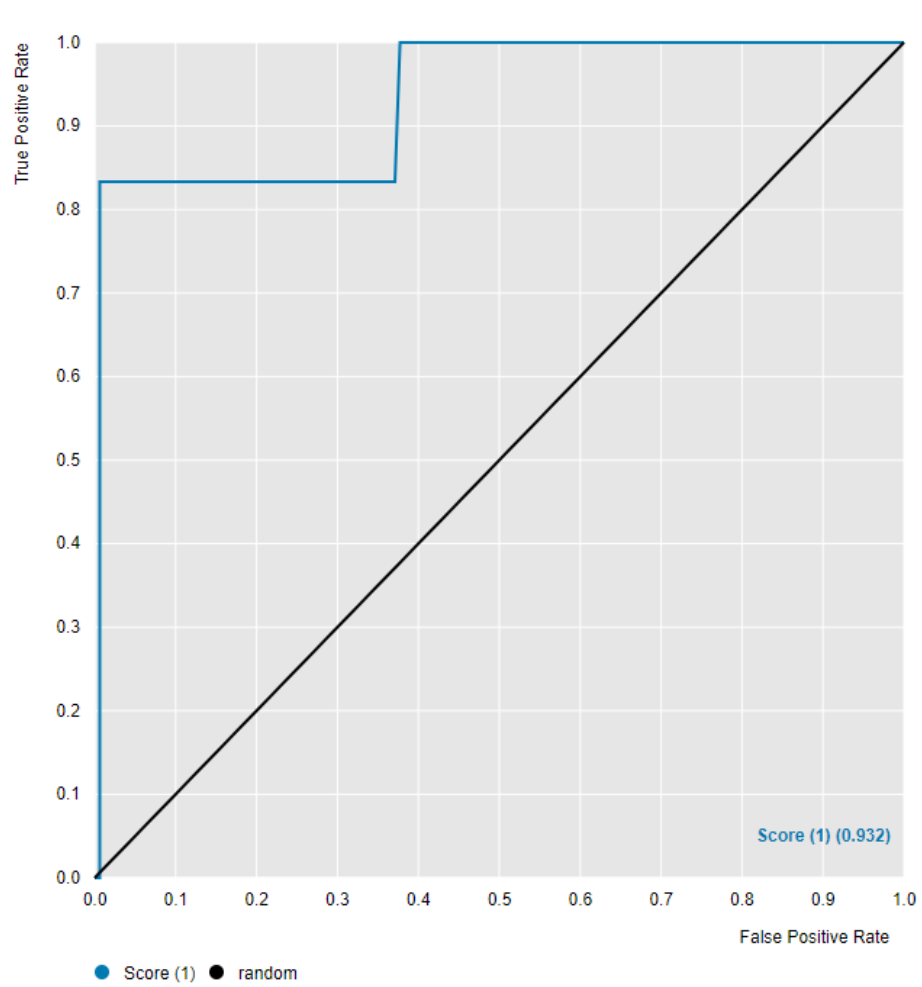

N=165

|                   |        |
|-------------------|--------|
| Top 10% Mean IC50 | 271 nM |
|-------------------|--------|

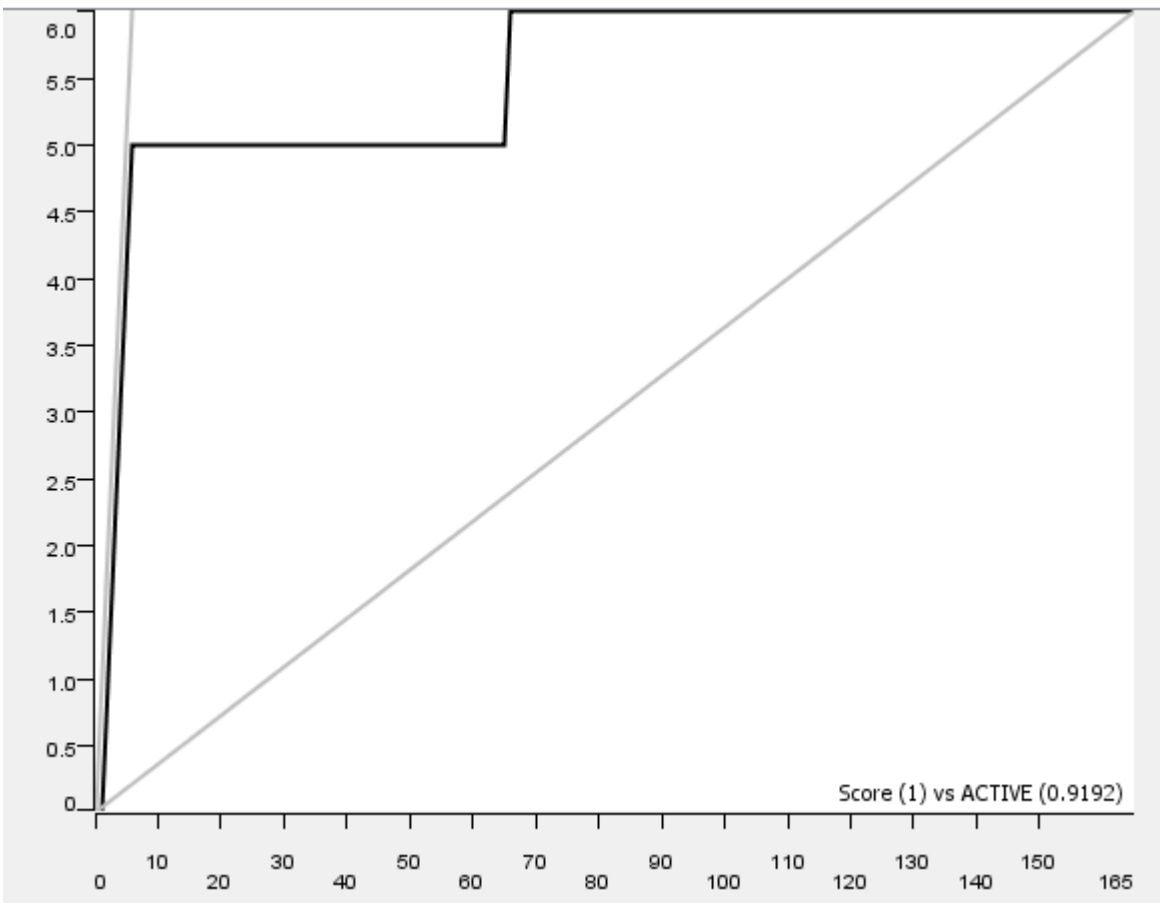

|          | Predicted Active | Predicted Inactive |
|----------|------------------|--------------------|
| Active   | 5                | 1                  |
| Inactive | 51               | 108                |

# <10 nM DefGood in MEK1

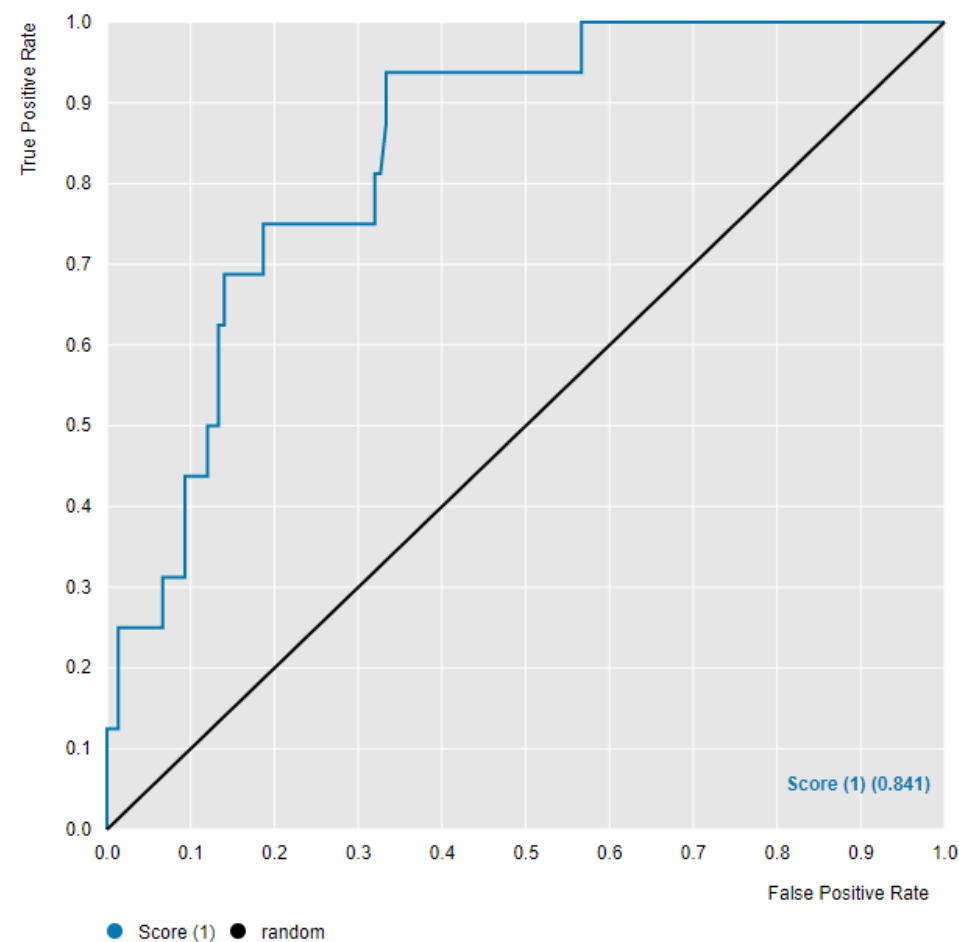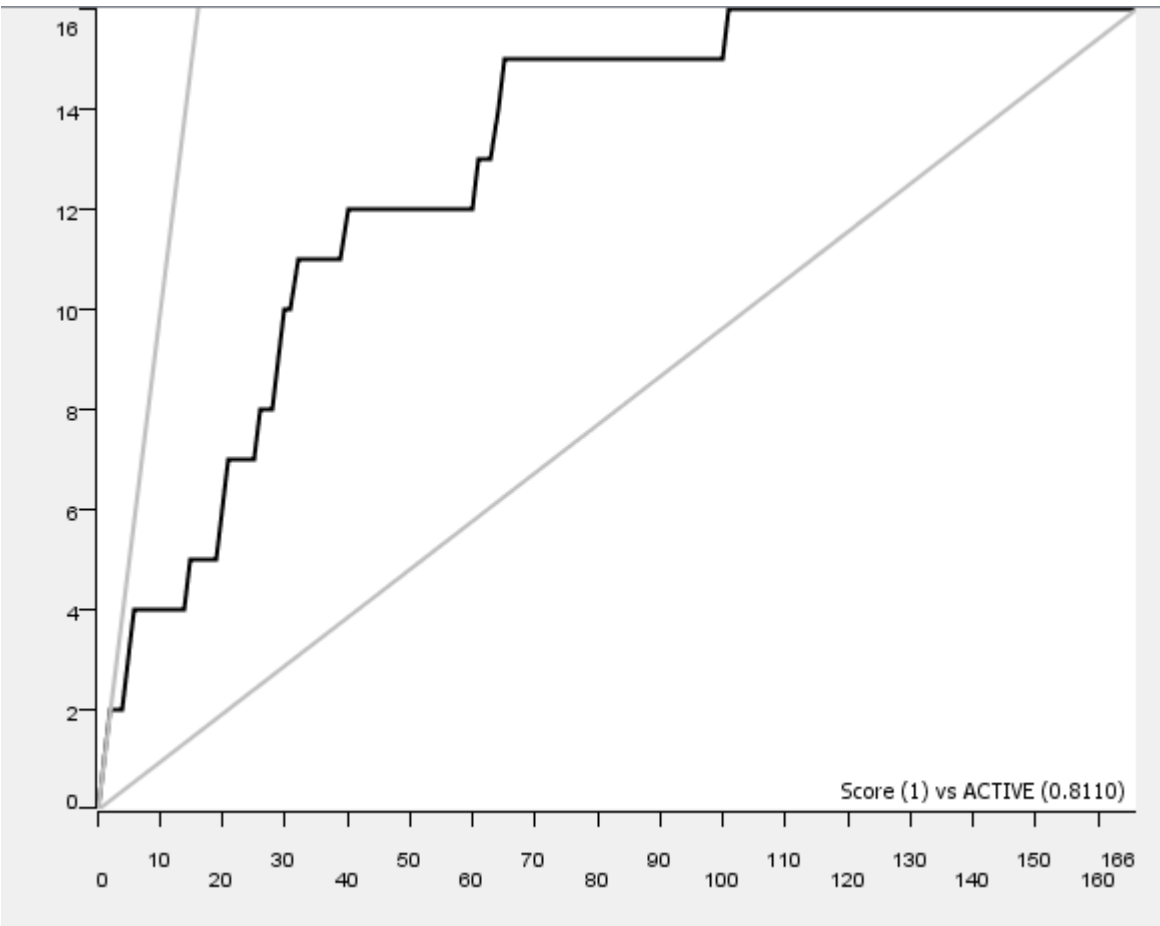

N=165

|                      |         |
|----------------------|---------|
| Top 10% Mean<br>IC50 | 93.5 nM |
|----------------------|---------|

|          | Predicted Active | Predicted Inactive |
|----------|------------------|--------------------|
| Active   | 11               | 5                  |
| Inactive | 28               | 122                |

# <15 nM DefGood in MEK1

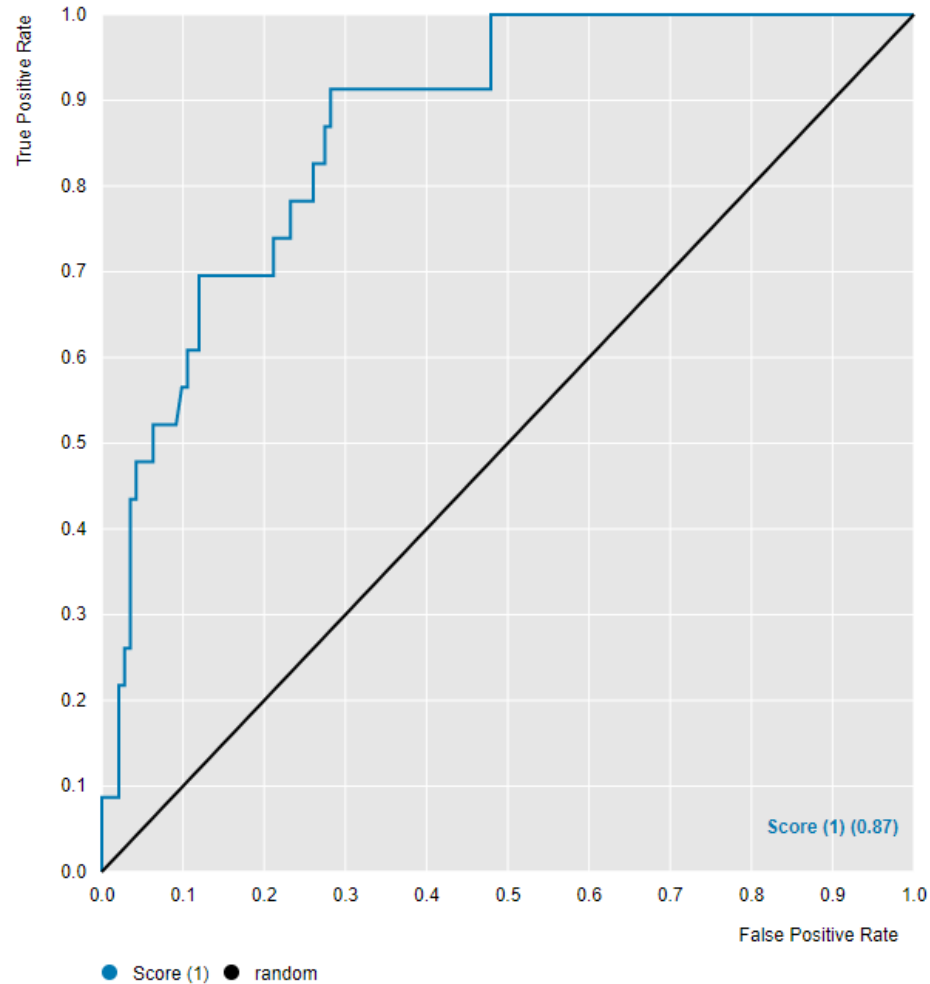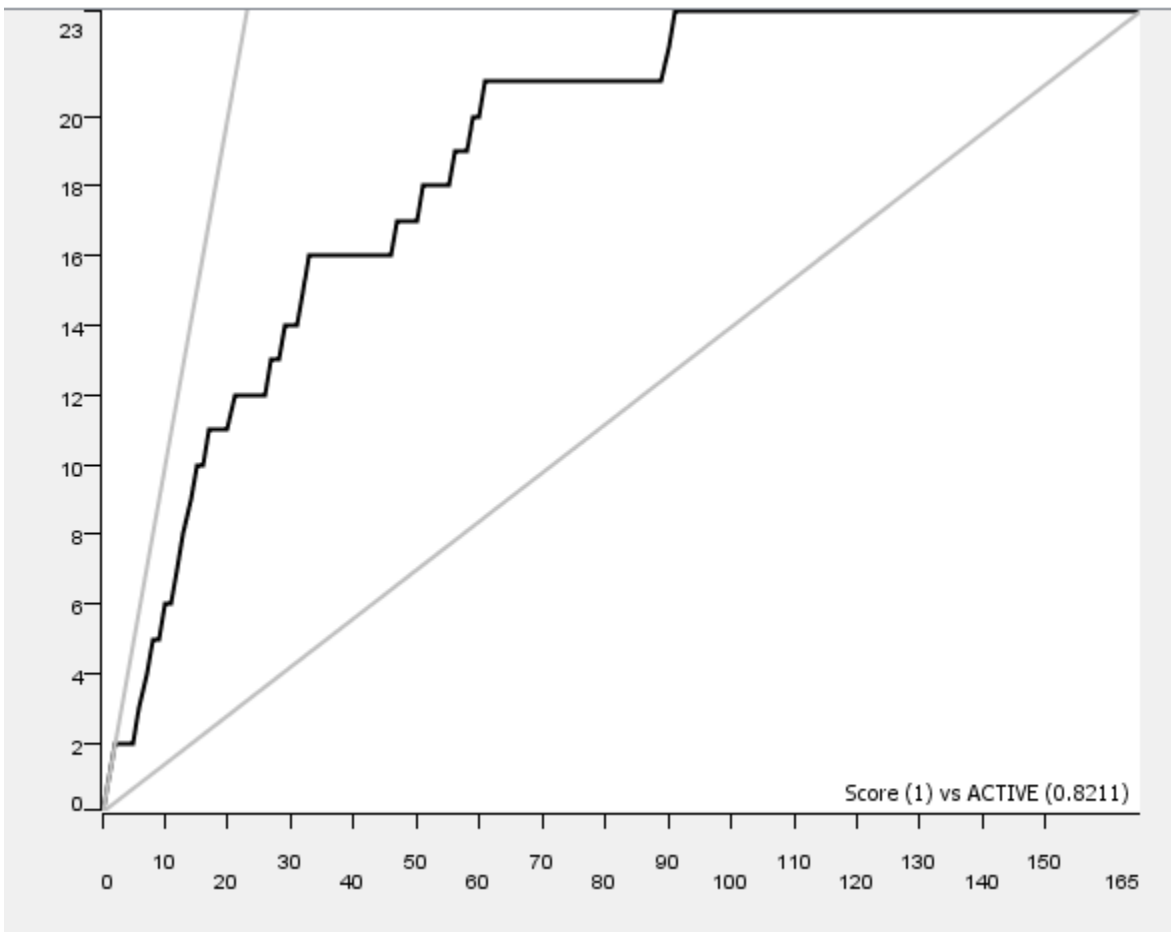

N=165

|                      |        |
|----------------------|--------|
| Top 10% Mean<br>IC50 | 129 nM |
|----------------------|--------|

|          | Predicted Active | Predicted Inactive |
|----------|------------------|--------------------|
| Active   | 21               | 2                  |
| Inactive | 43               | 99                 |

# <20 nM DefGood in MEK1

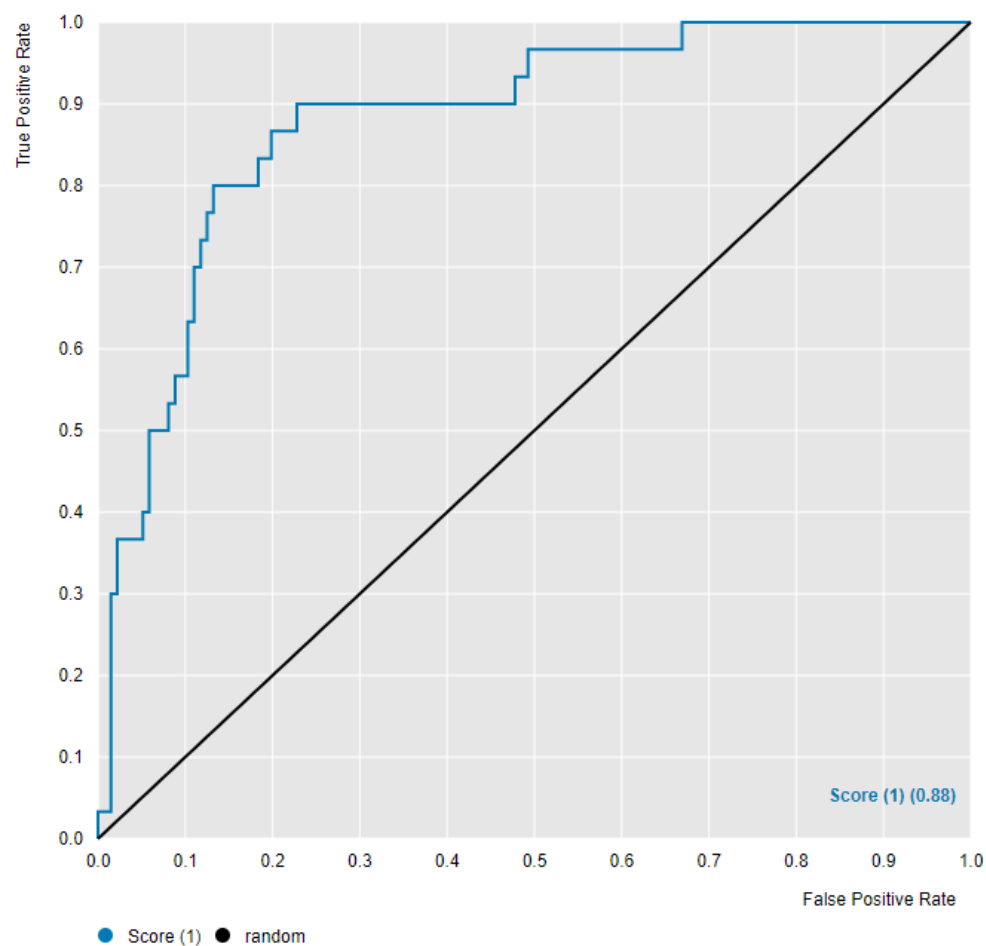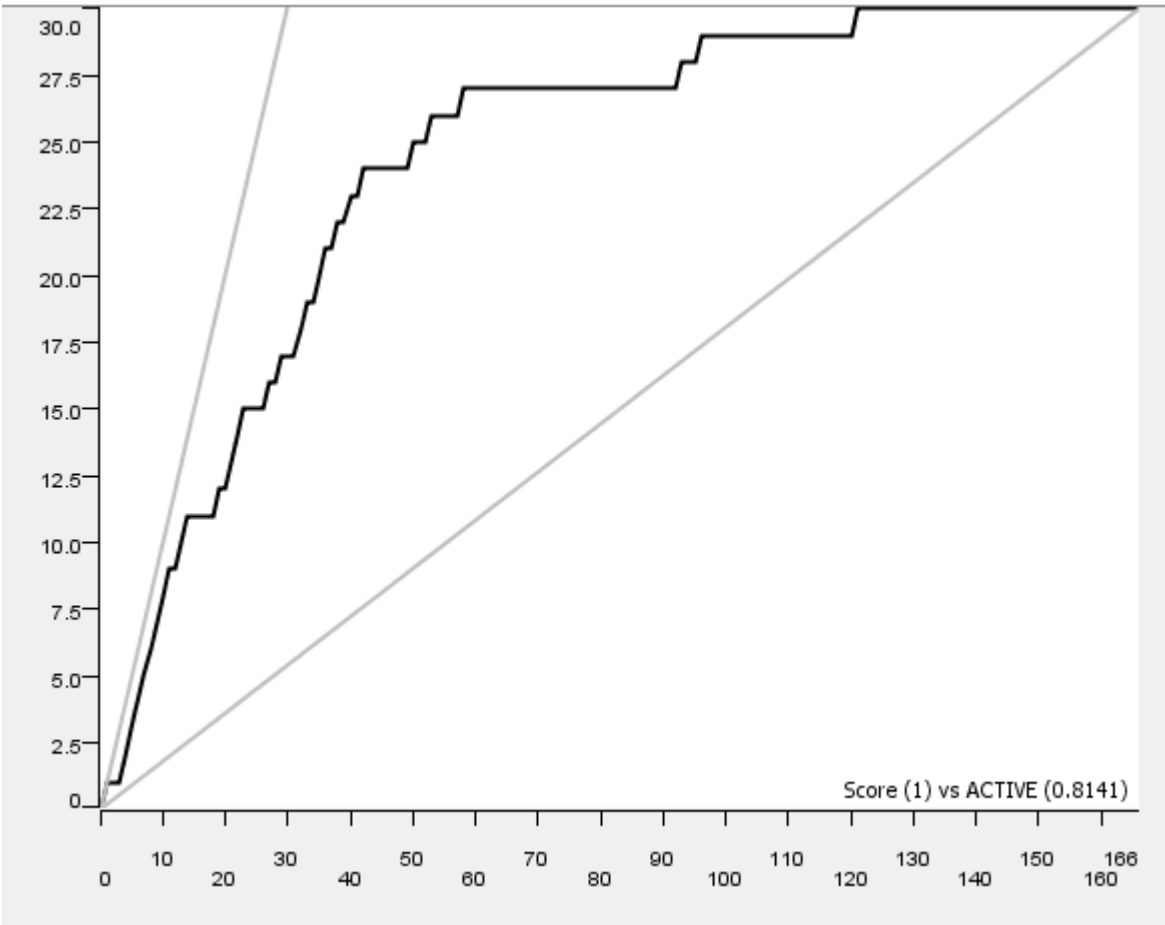

N=166

|                   |        |
|-------------------|--------|
| Top 10% Mean IC50 | 121 nM |
|-------------------|--------|

|          | Predicted Active | Predicted Inactive |
|----------|------------------|--------------------|
| Active   | 27               | 3                  |
| Inactive | 38               | 98                 |

# <25 nM DefGood in MEK1

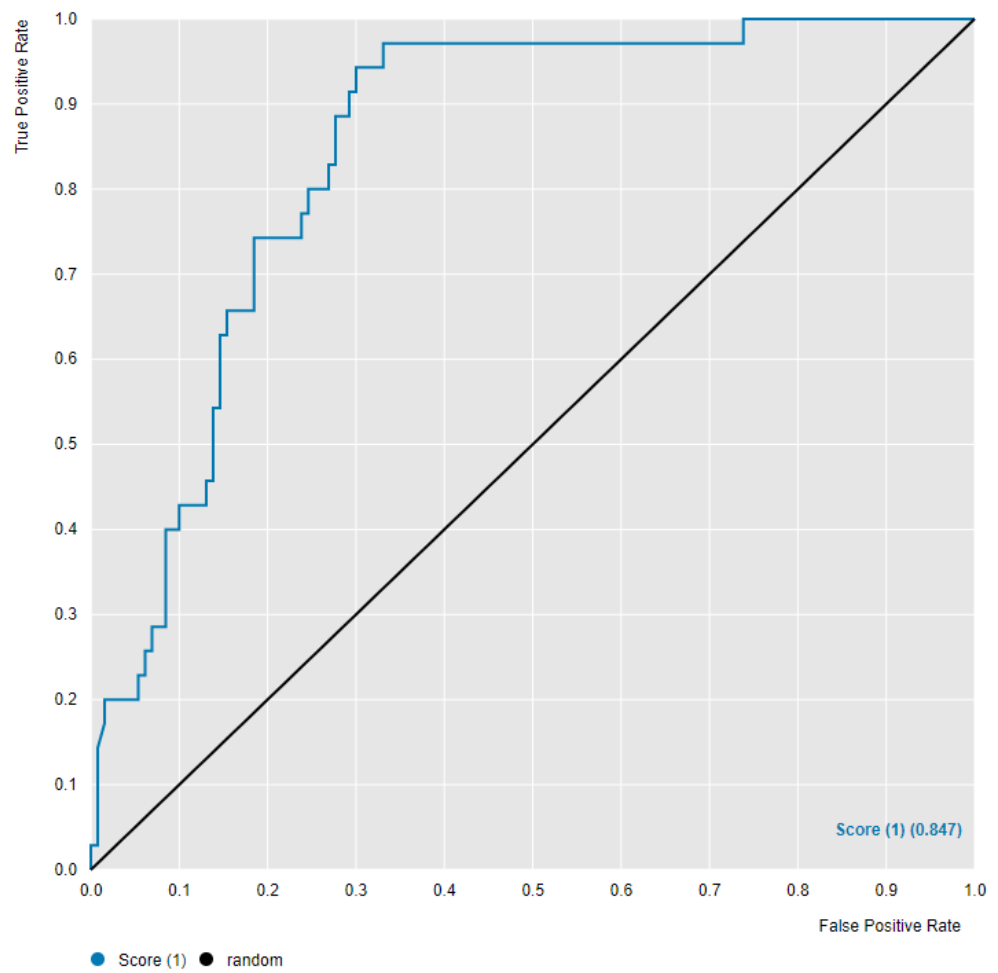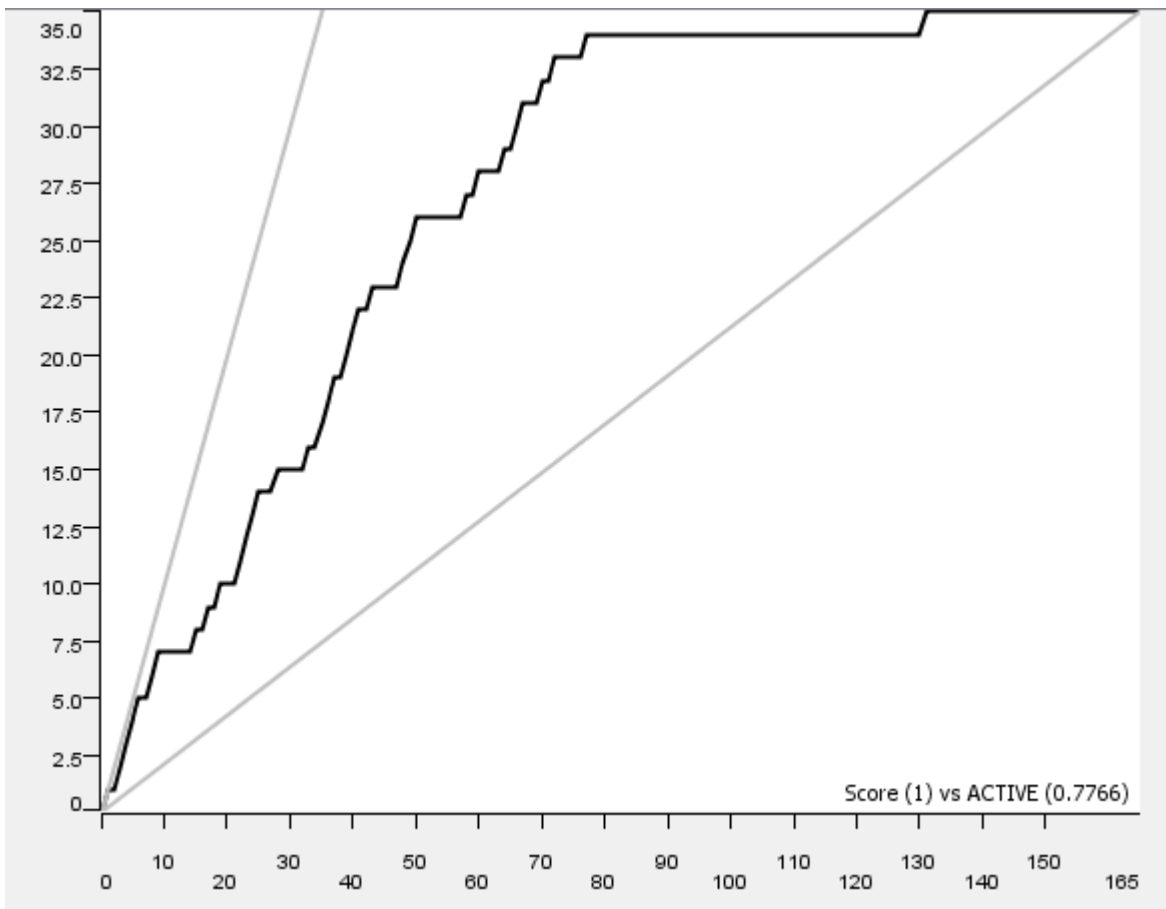

N=166

|                   |       |
|-------------------|-------|
| Top 10% Mean IC50 | 54 nM |
|-------------------|-------|

|          | Predicted Active | Predicted Inactive |
|----------|------------------|--------------------|
| Active   | 25               | 10                 |
| Inactive | 24               | 106                |

# <35 nM DefGood in MEK1

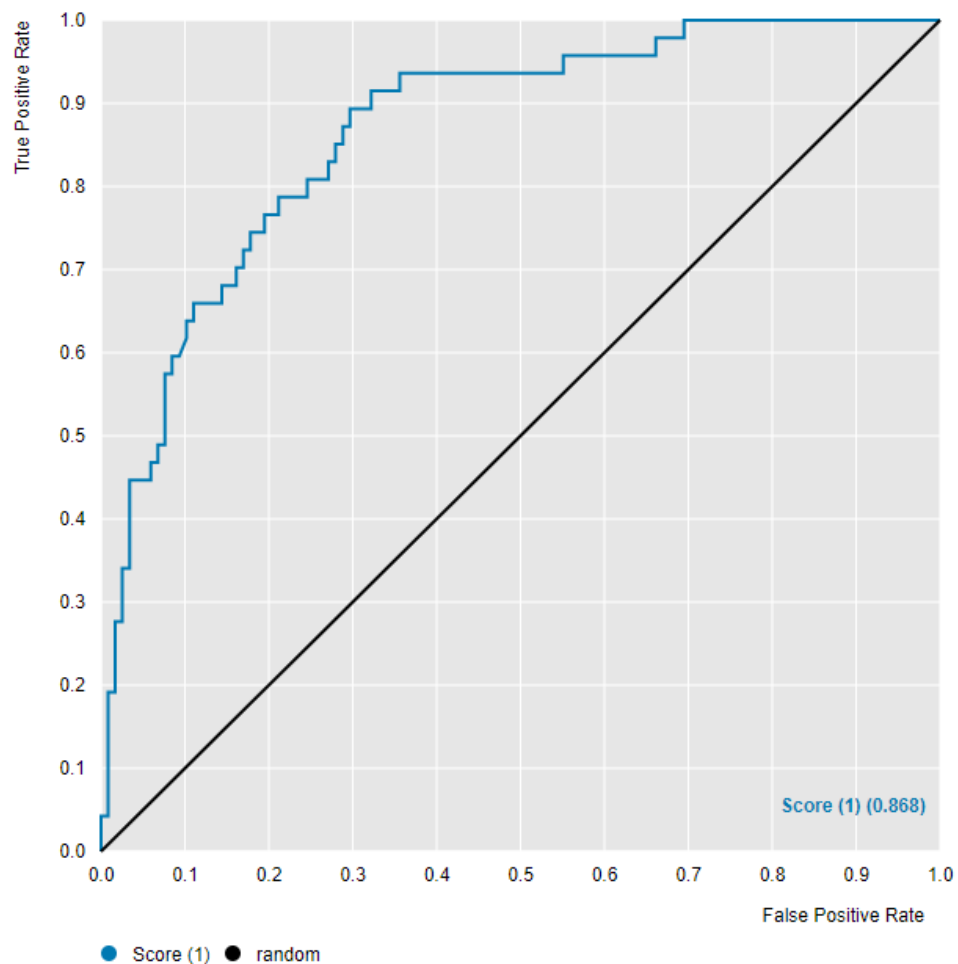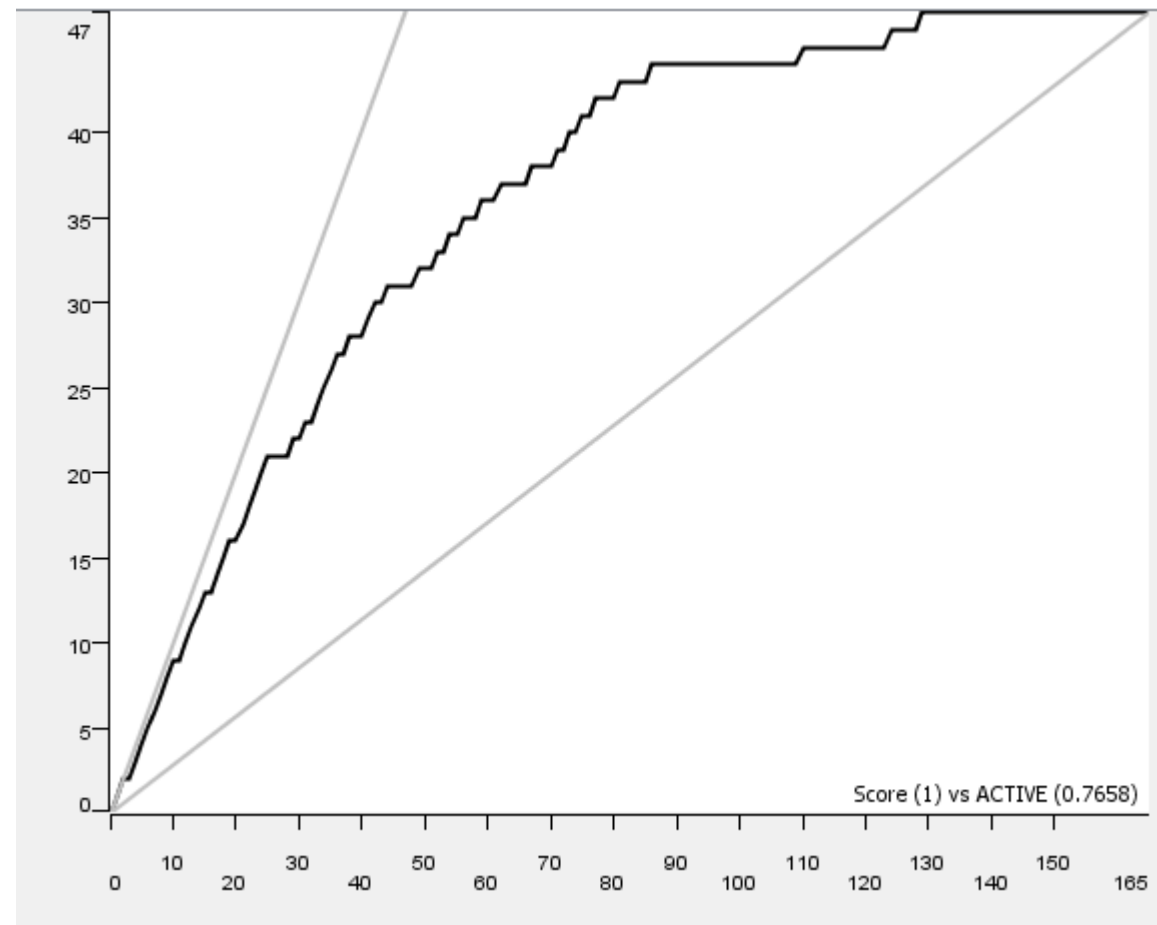

N=165

Top 10% Mean  
IC50

23 nM

|          | Predicted Active | Predicted Inactive |
|----------|------------------|--------------------|
| Active   | 34               | 13                 |
| Inactive | 20               | 98                 |



# <50 nM DefGood in MEK1

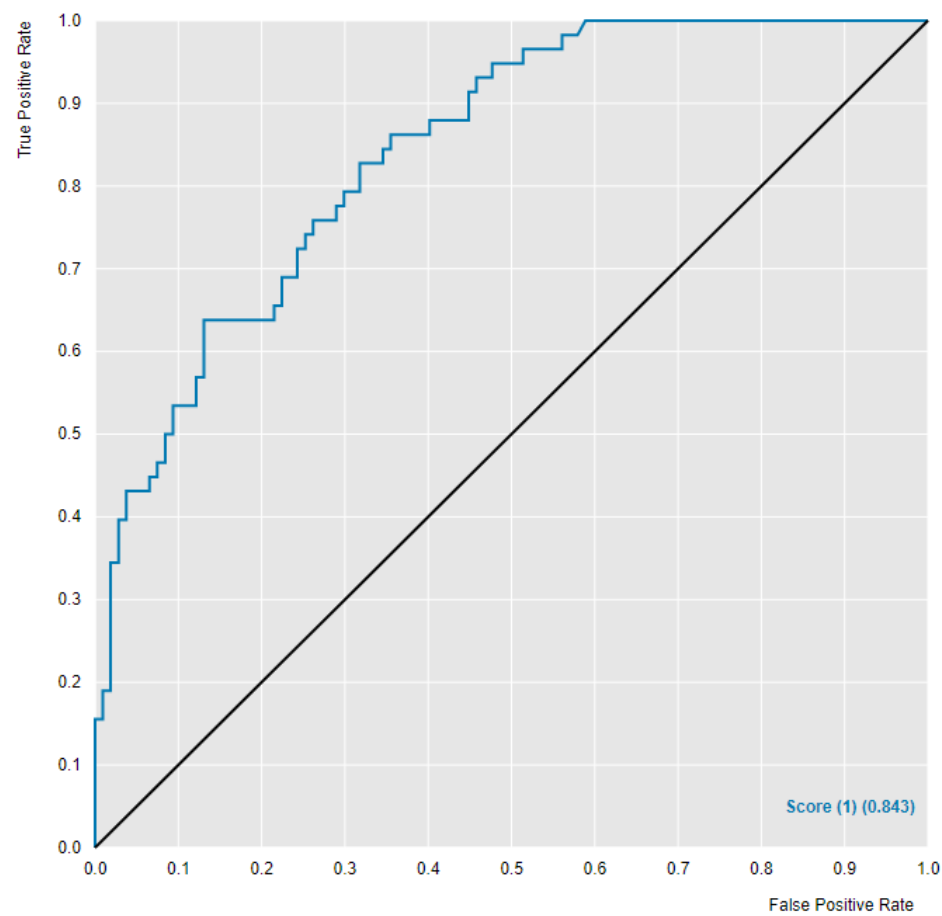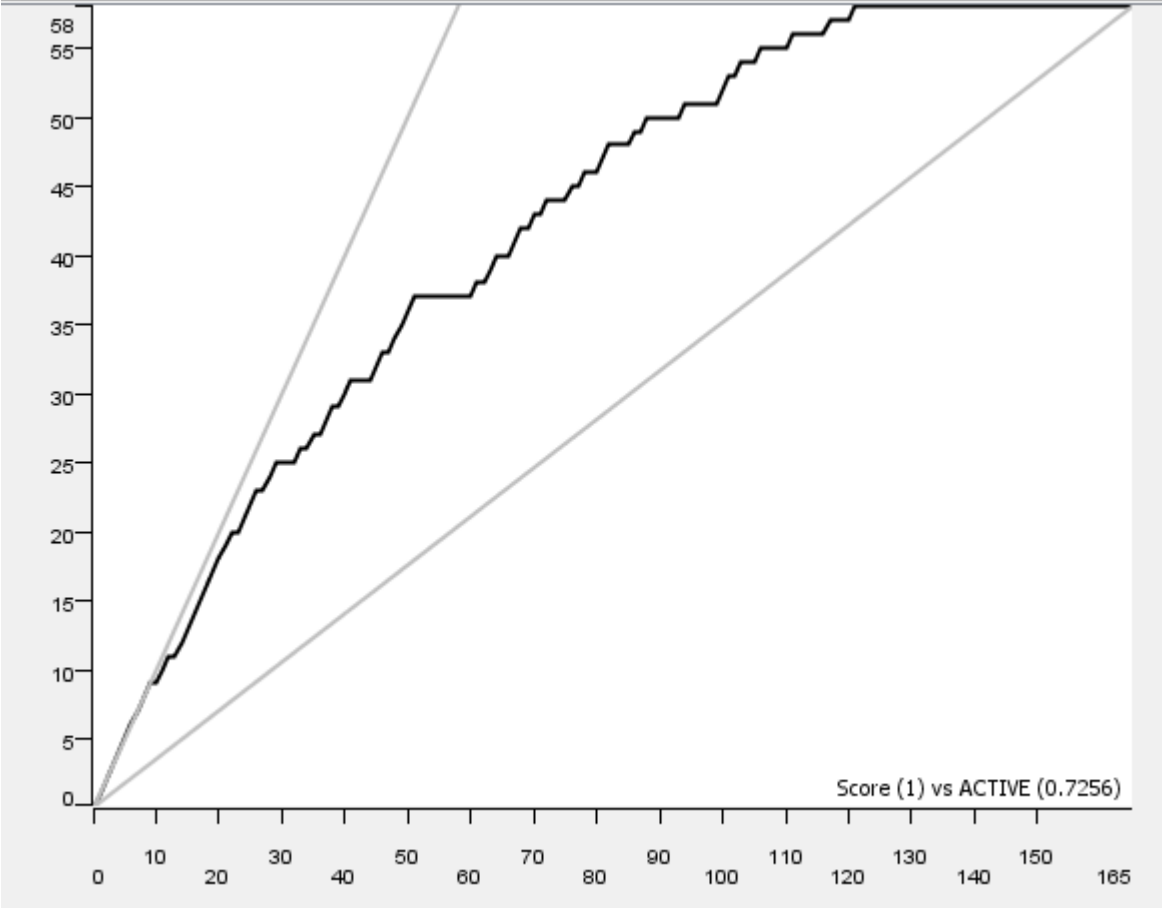

N=165

|                   |         |
|-------------------|---------|
| Top 10% Mean IC50 | 23.4 Nm |
|-------------------|---------|

|          | Predicted Active | Predicted Inactive |
|----------|------------------|--------------------|
| Active   | 37               | 21                 |
| Inactive | 19               | 88                 |

# Decision on DefGood

- <35 nM has the best performance with regard to enrichment and mean top 10% IC50, although <50 nM has a similar performance. The precision of the <35 nM NBN was 0.629 whereas the precision of the <50 nM NBN was 0.66. Therefore, <50 nM was used as DefGood

# RF - <50 nM DefGood in MEK1

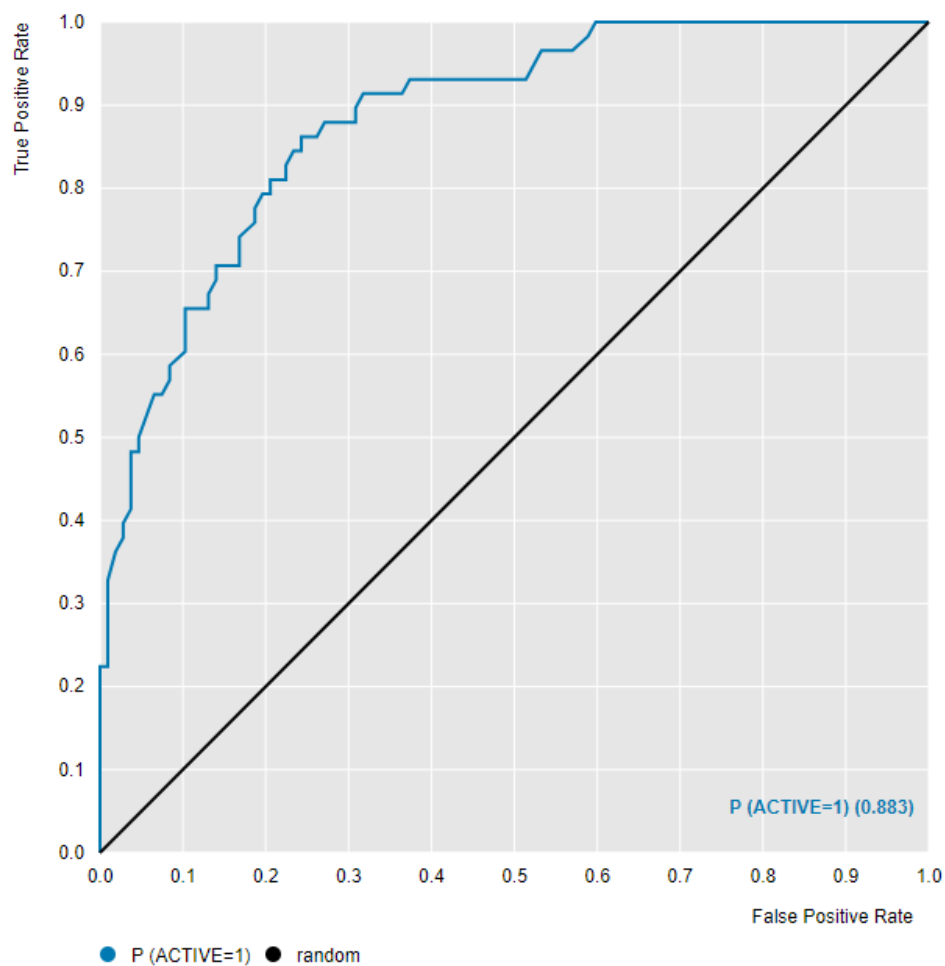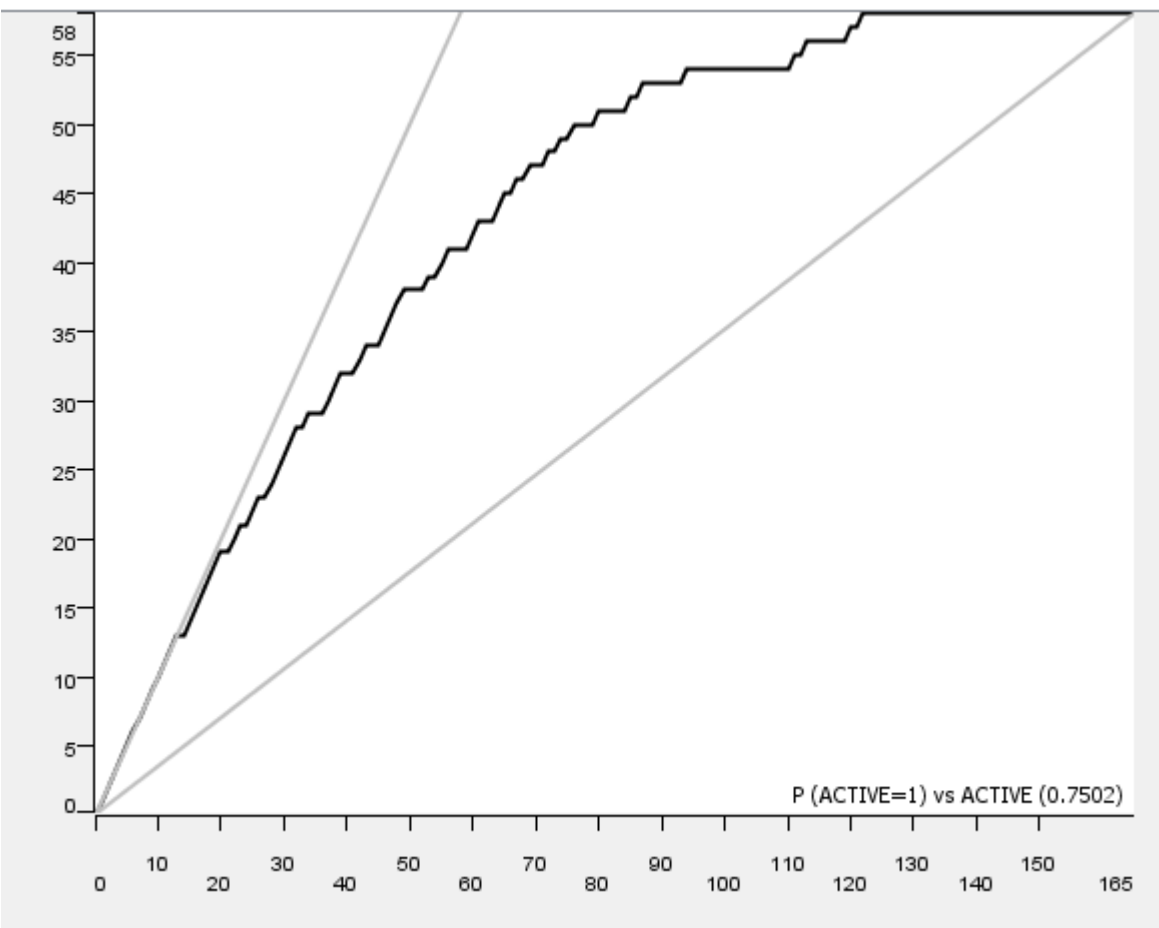

N=165

|                      |                                     |
|----------------------|-------------------------------------|
| Top 10% Mean<br>IC50 | 120 nM<br>(one 1,700 nM<br>mistake) |
|----------------------|-------------------------------------|

|          | Predicted Active | Predicted Inactive |
|----------|------------------|--------------------|
| Active   | 43               | 15                 |
| Inactive | 18               | 89                 |

# Decision on DefGood - RF

- Work in ALK showed DefGood in the NBN was similar to DefGood in an RF. Therefore, this value for DefGood from the NBN design was used as DefGood.

# PNN - <50 nM DefGood in MEK1

- Properties List (46 calculatable properties were used)
- Parameterization (Global Accuracy for Activity at a 5 nM decision value was used, and a 5-fold stratified sampling cross validation was used to parameterize theta minus and theta plus) Theta Minus = 0.05 and Theta Plus = 0.75

# PNN - <50 nM DefGood in MEK1

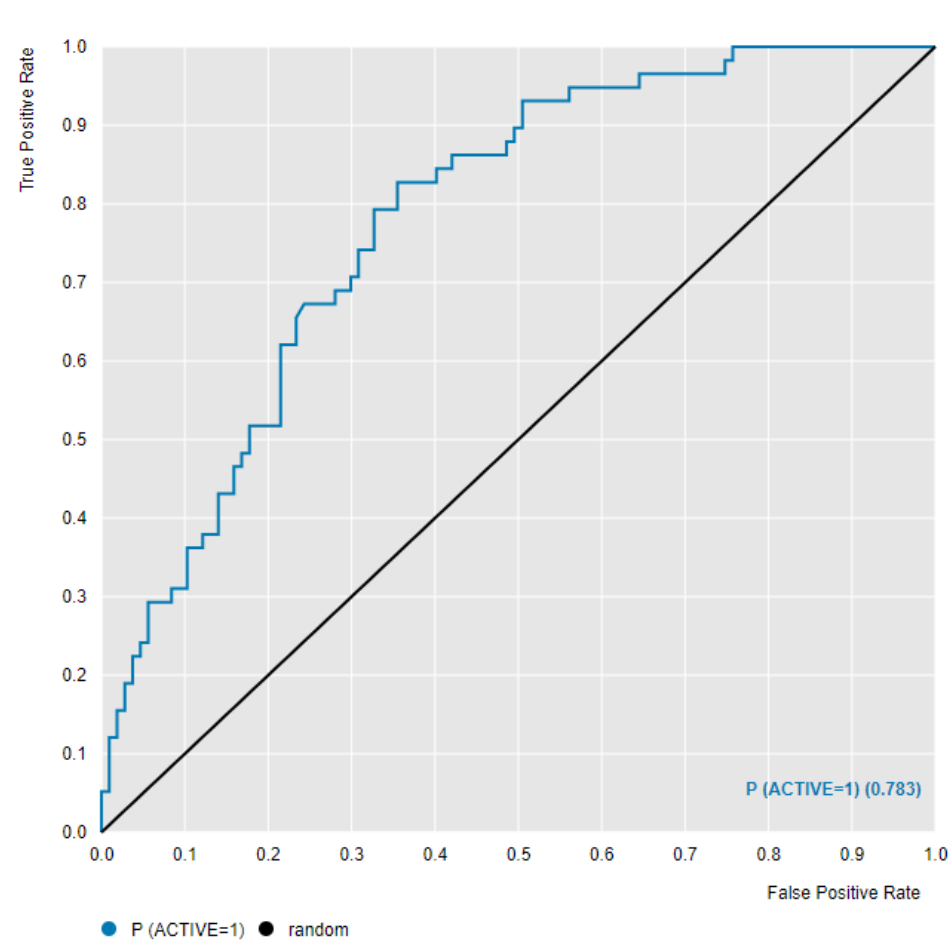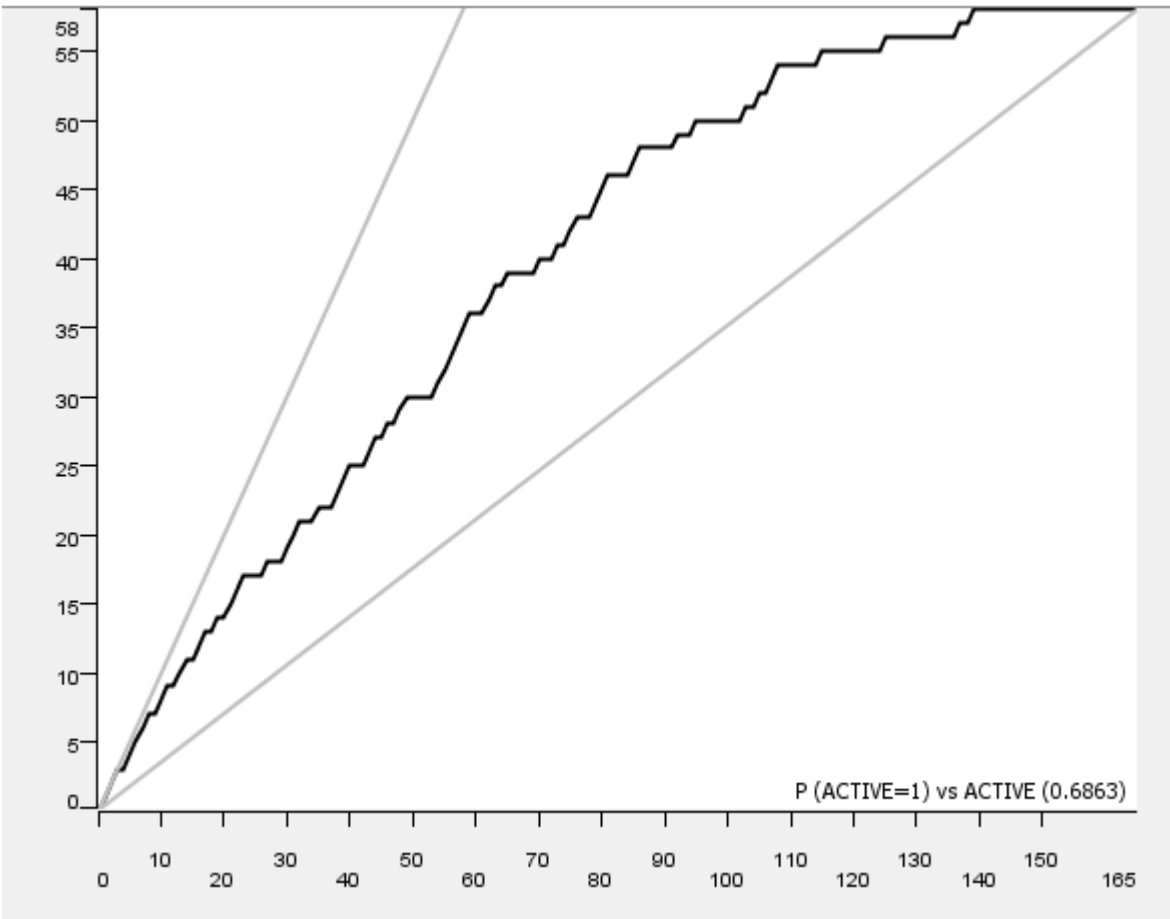

N=165

|                   |         |
|-------------------|---------|
| Top 10% Mean IC50 | 47.9 nM |
|-------------------|---------|

|          | Predicted Active | Predicted Inactive |
|----------|------------------|--------------------|
| Active   | 30               | 28                 |
| Inactive | 19               | 88                 |

# Decision on DefGood - PNN

- Parameterization resulted in a useful PNN with the  $<50$  nM DefGood. Parameterization for each model adds significant time to the process. A rough benchmark can be applied where point of failure is discovered and then the model is parameterized to ensure that the situation is optimal for the PNN. This will be applied to the discovery of the error tolerance threshold for the PNN as was done in the beta 2 adrenergic receptor space.

# NBN Error Tolerance- <50 nM DefGood in MEK1

- 0-50% absolute error



<50 nM DefGood in MEK1, 5% error; Random seed = 1515533876005

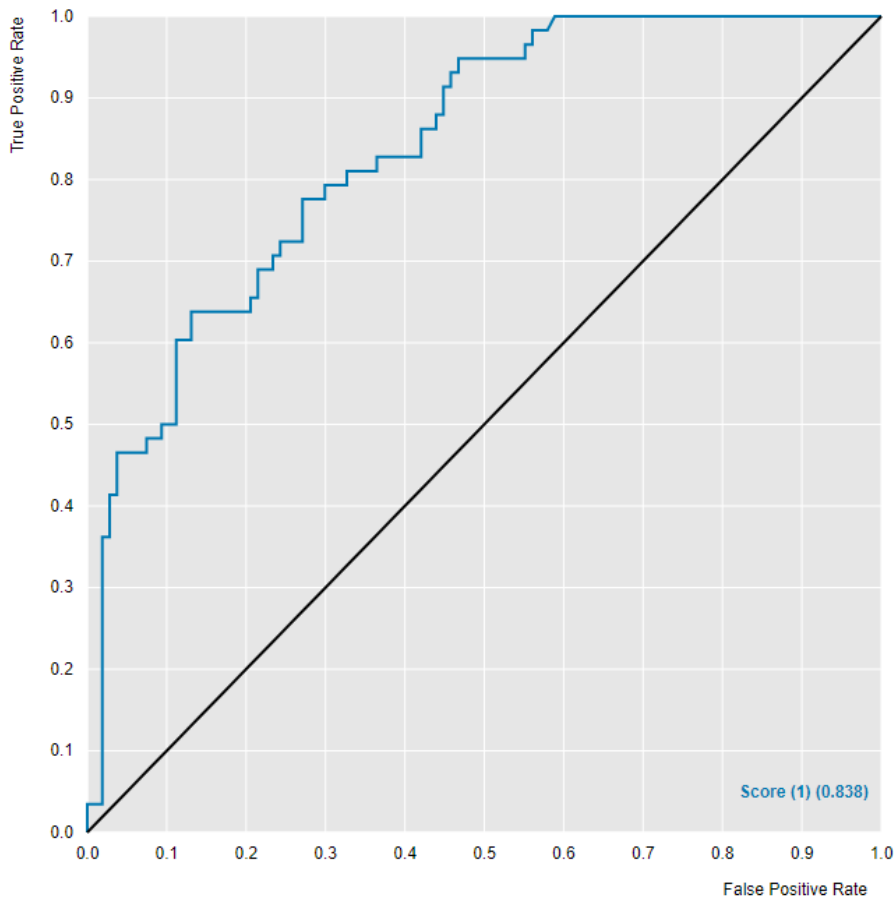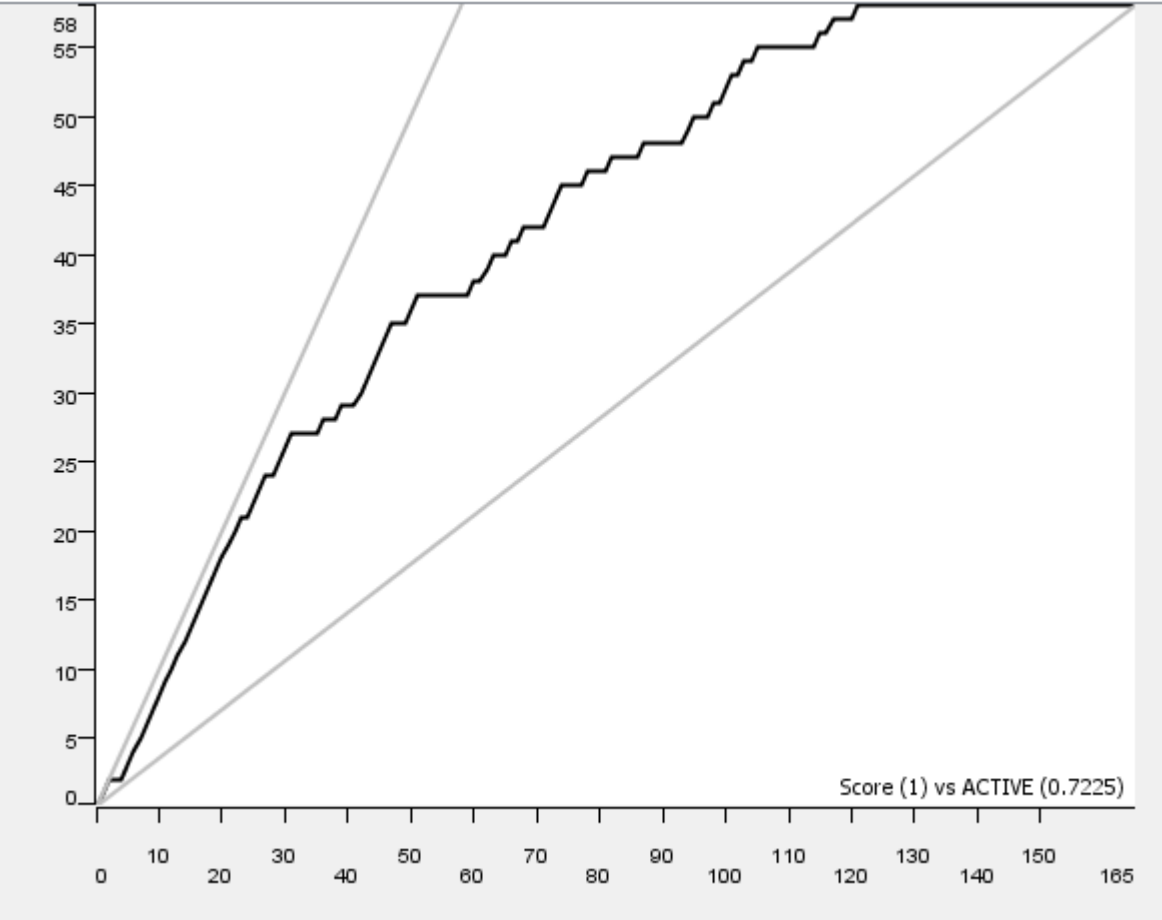

N=165

| Top 10% Mean IC50 | 20.4 nM |
|-------------------|---------|
|-------------------|---------|

|          | Predicted Active | Predicted Inactive |
|----------|------------------|--------------------|
| Active   | 45               | 13                 |
| Inactive | 31               | 76                 |

# <50nM DefGood in MEK1, 10% error

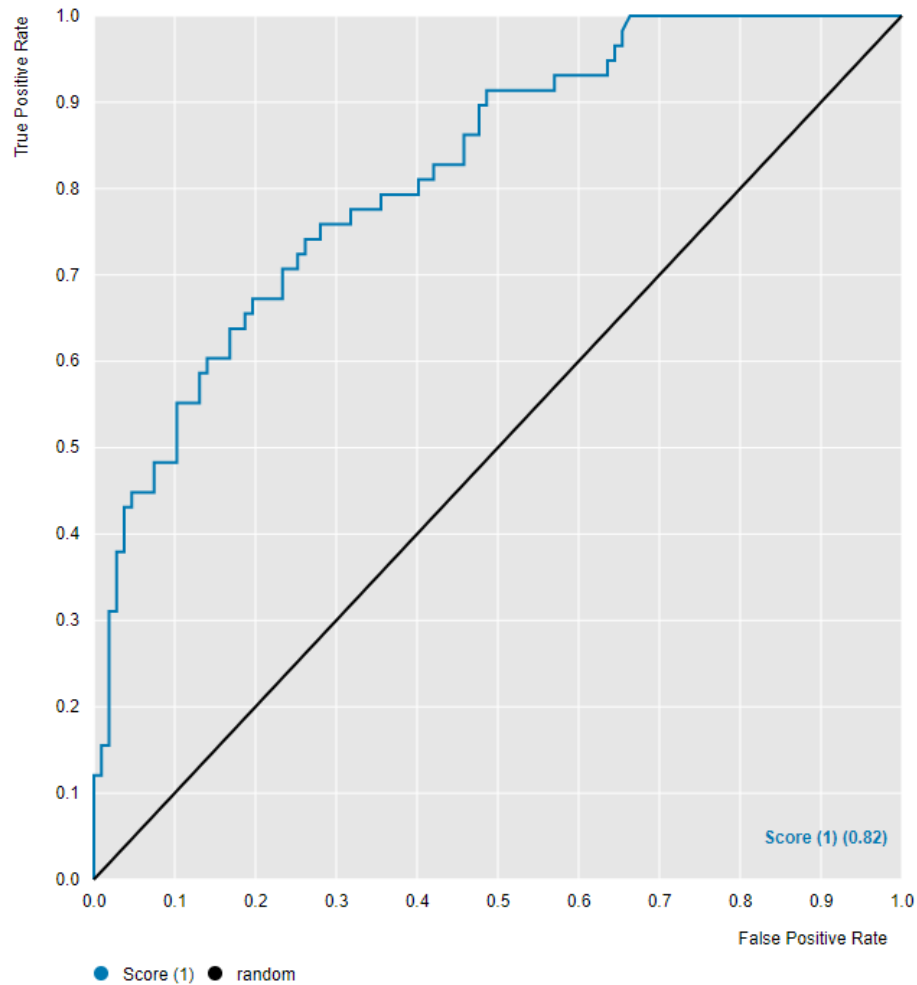

N=165

| Top 10% Mean IC50 | 23.4 nM |
|-------------------|---------|
|-------------------|---------|

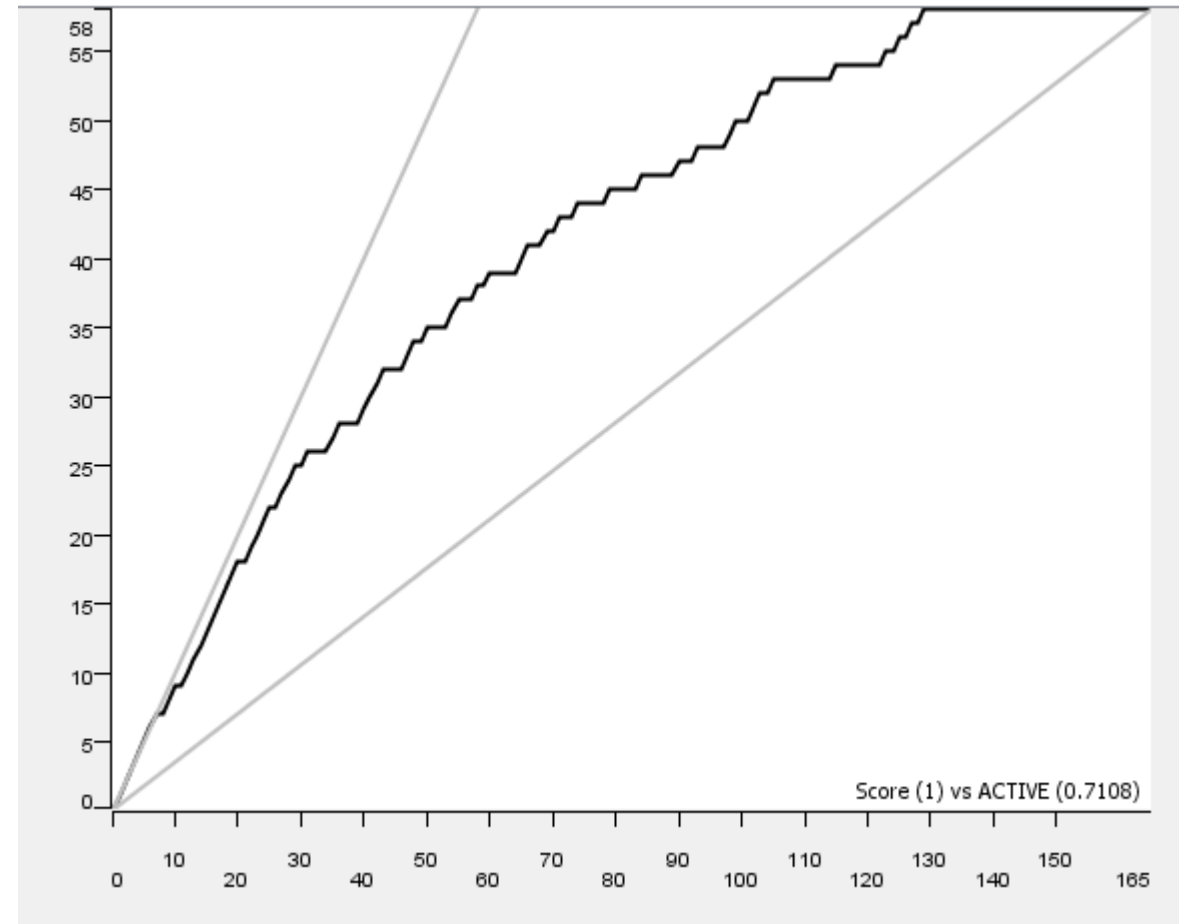

|          | Predicted Active | Predicted Inactive |
|----------|------------------|--------------------|
| Active   | 41               | 17                 |
| Inactive | 26               | 81                 |

# <50nM DefGood in MEK1, 20% error

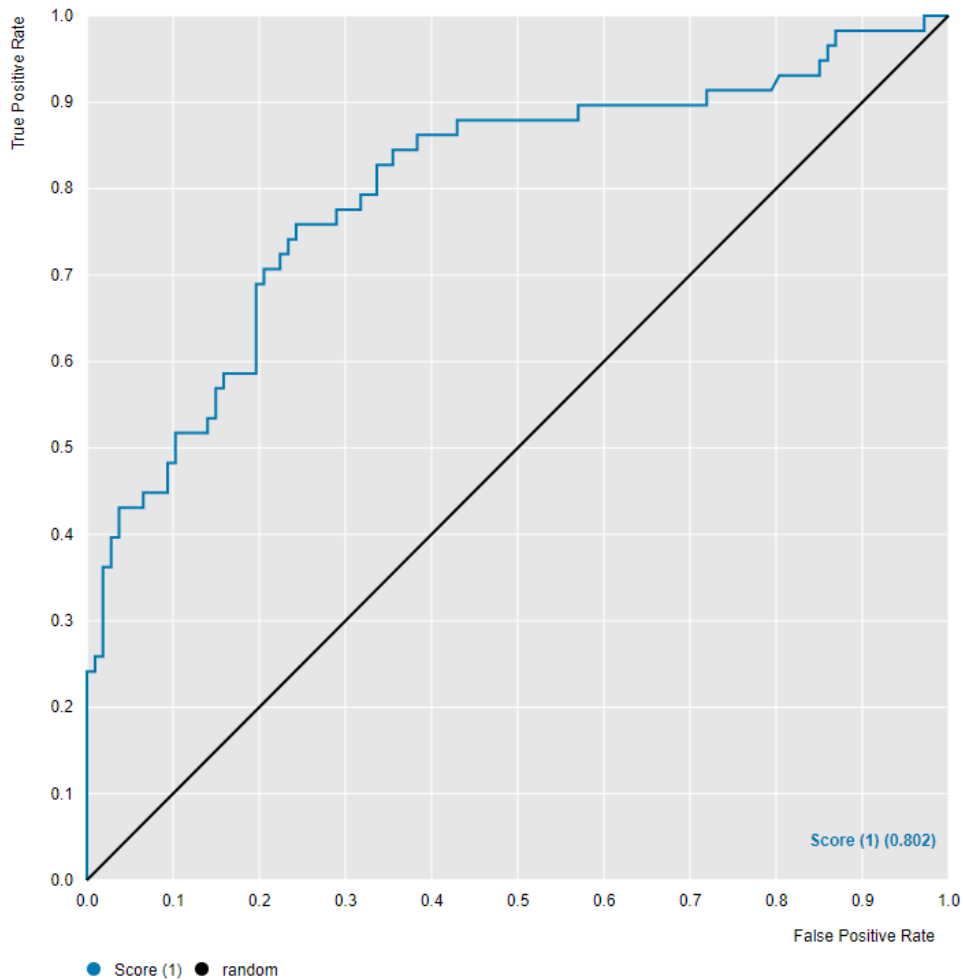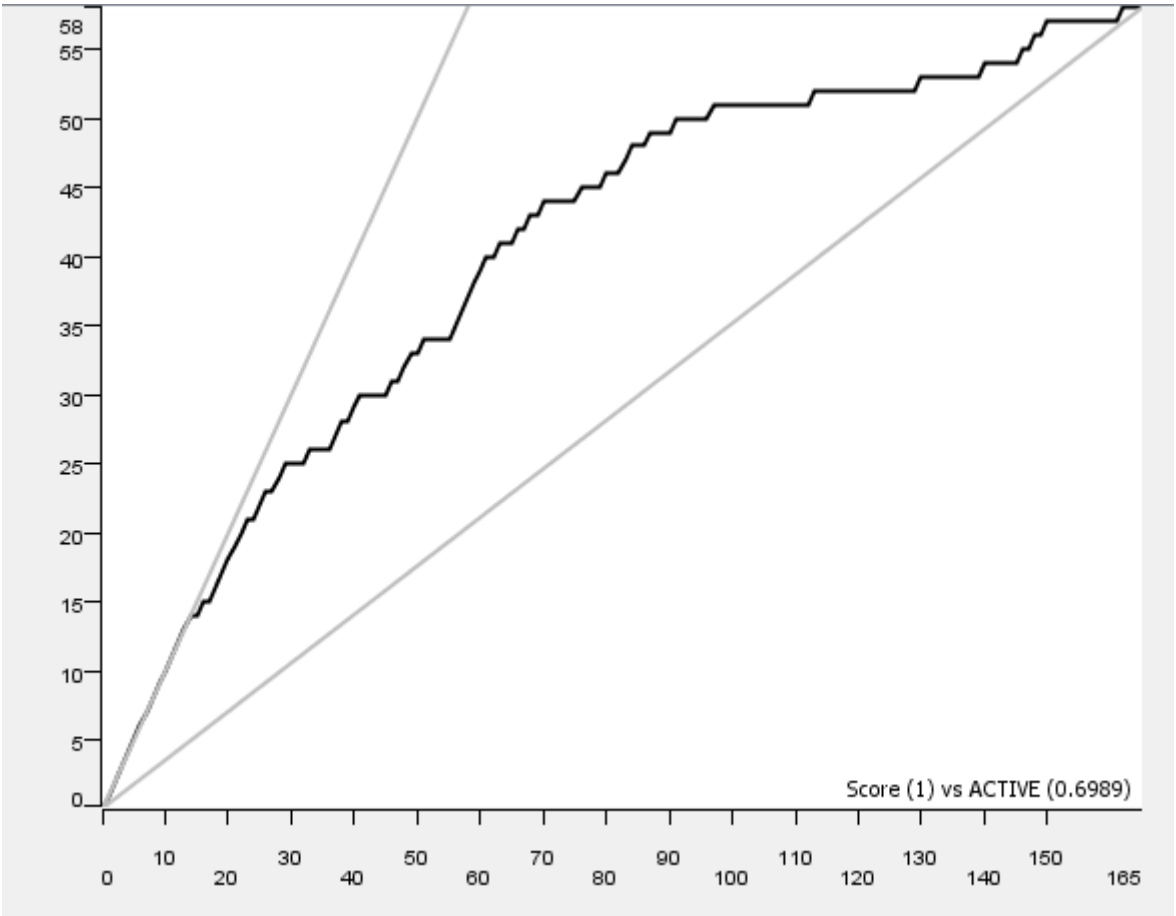

N=750

|                   |         |
|-------------------|---------|
| Top 10% Mean IC50 | 23.1 nM |
|-------------------|---------|

|          | Predicted Active | Predicted Inactive |
|----------|------------------|--------------------|
| Active   | 51               | 7                  |
| Inactive | 49               | 58                 |

# <50nM DefGood in MEK1, 30% error

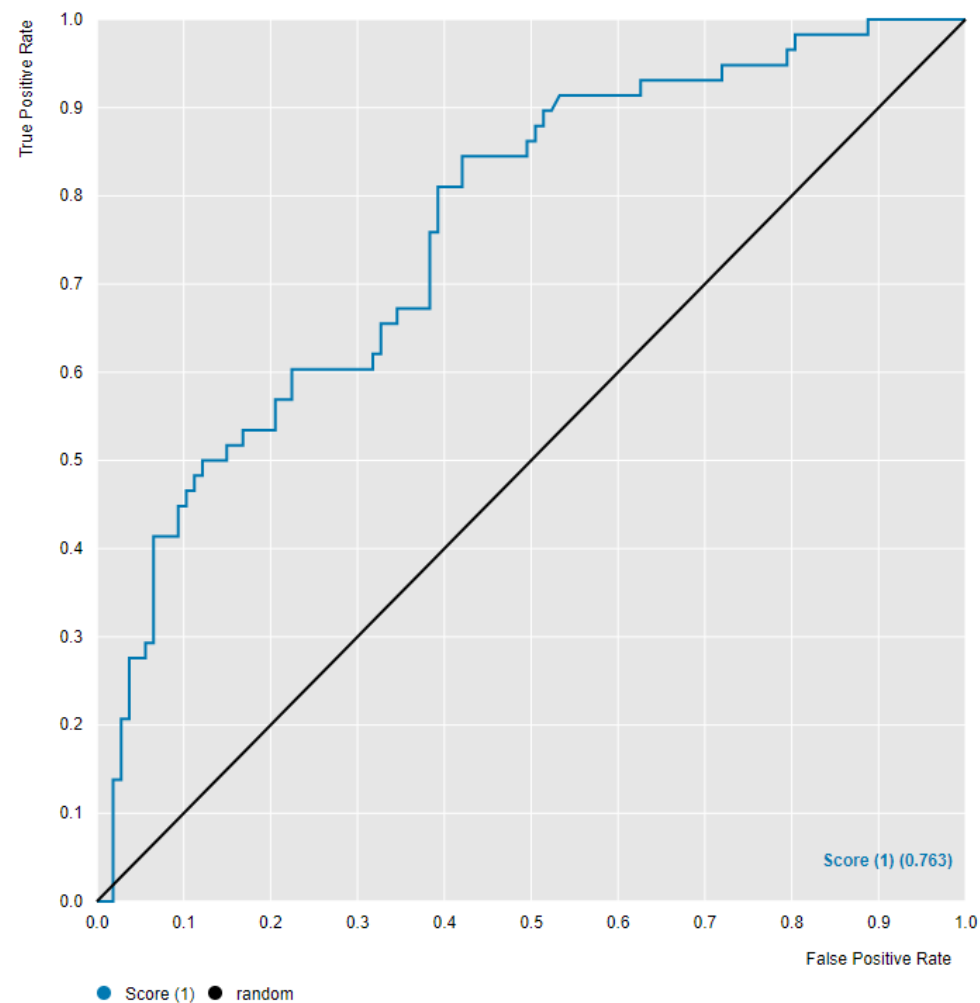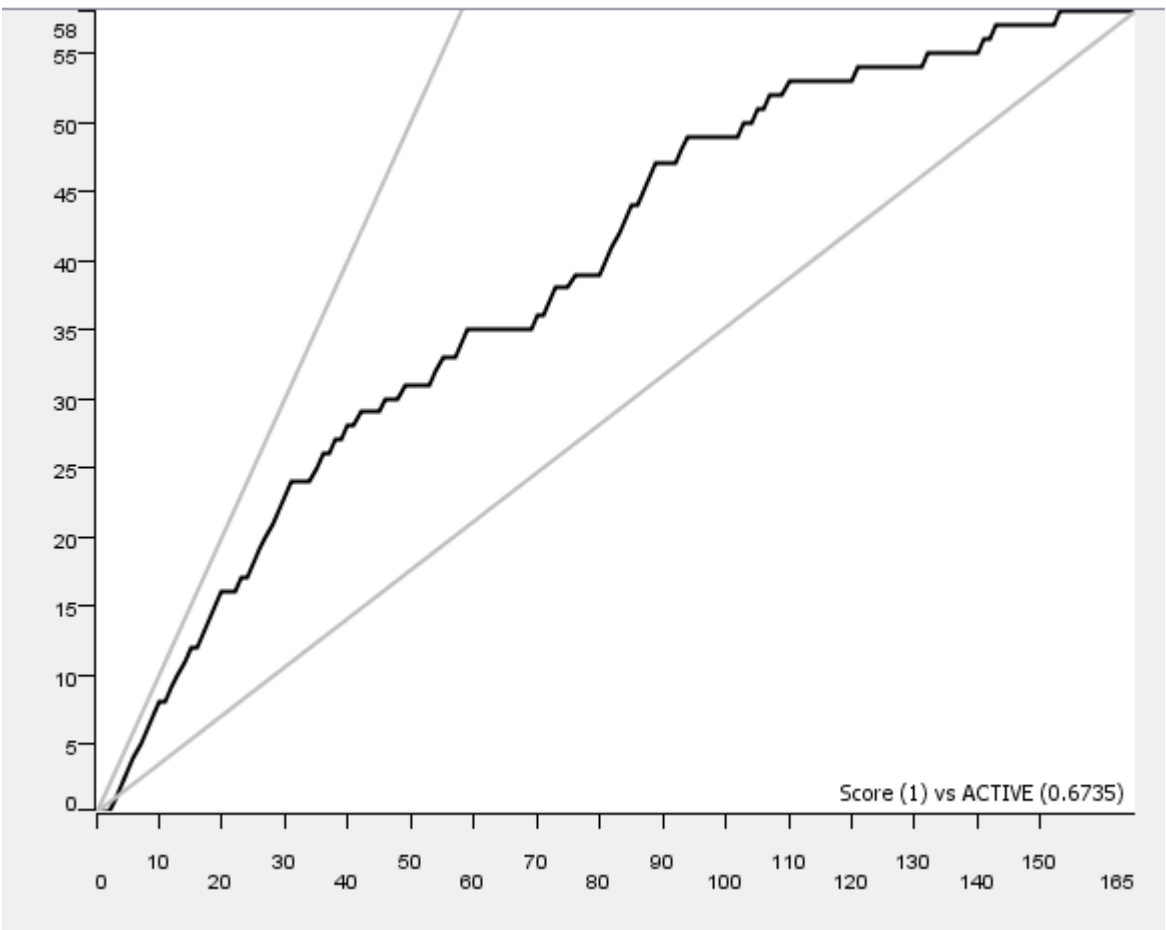

N=165

|                   |          |
|-------------------|----------|
| Top 10% Mean IC50 | 419.7 nM |
|-------------------|----------|

|          | Predicted Active | Predicted Inactive |
|----------|------------------|--------------------|
| Active   | 53               | 5                  |
| Inactive | 64               | 43                 |

# <50nM DefGood in MEK1, 35% error

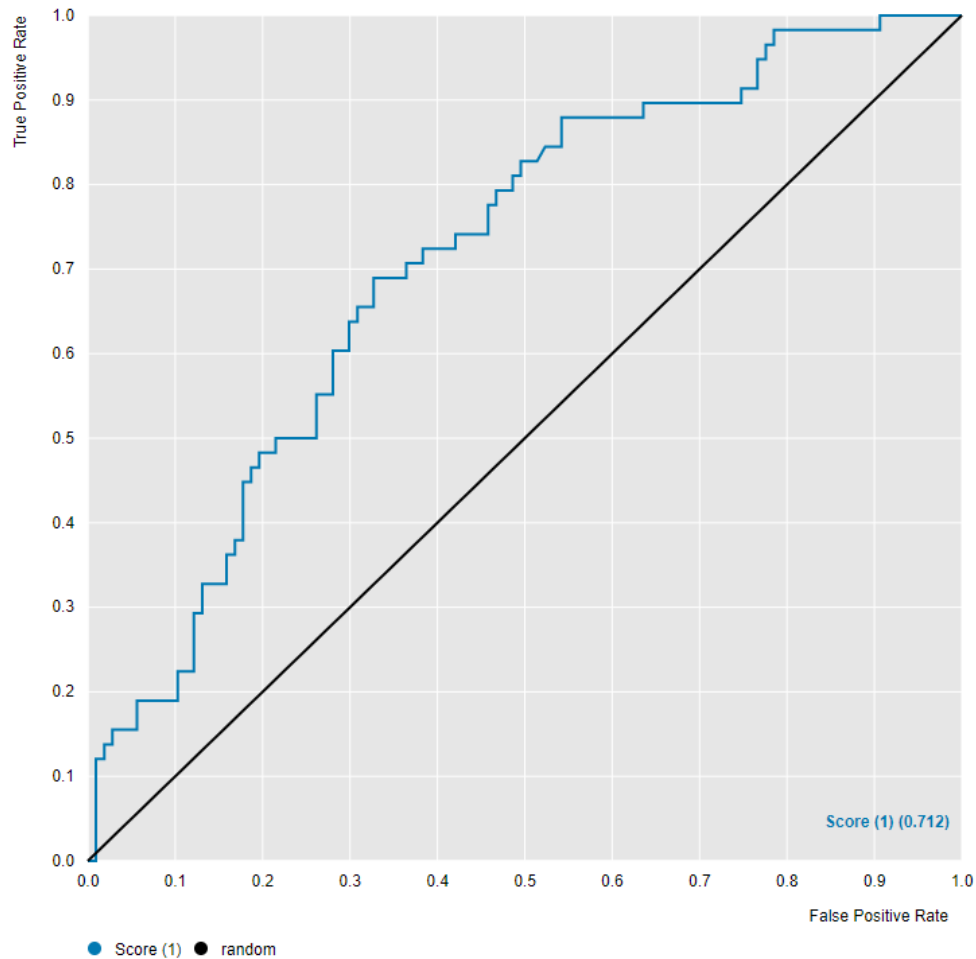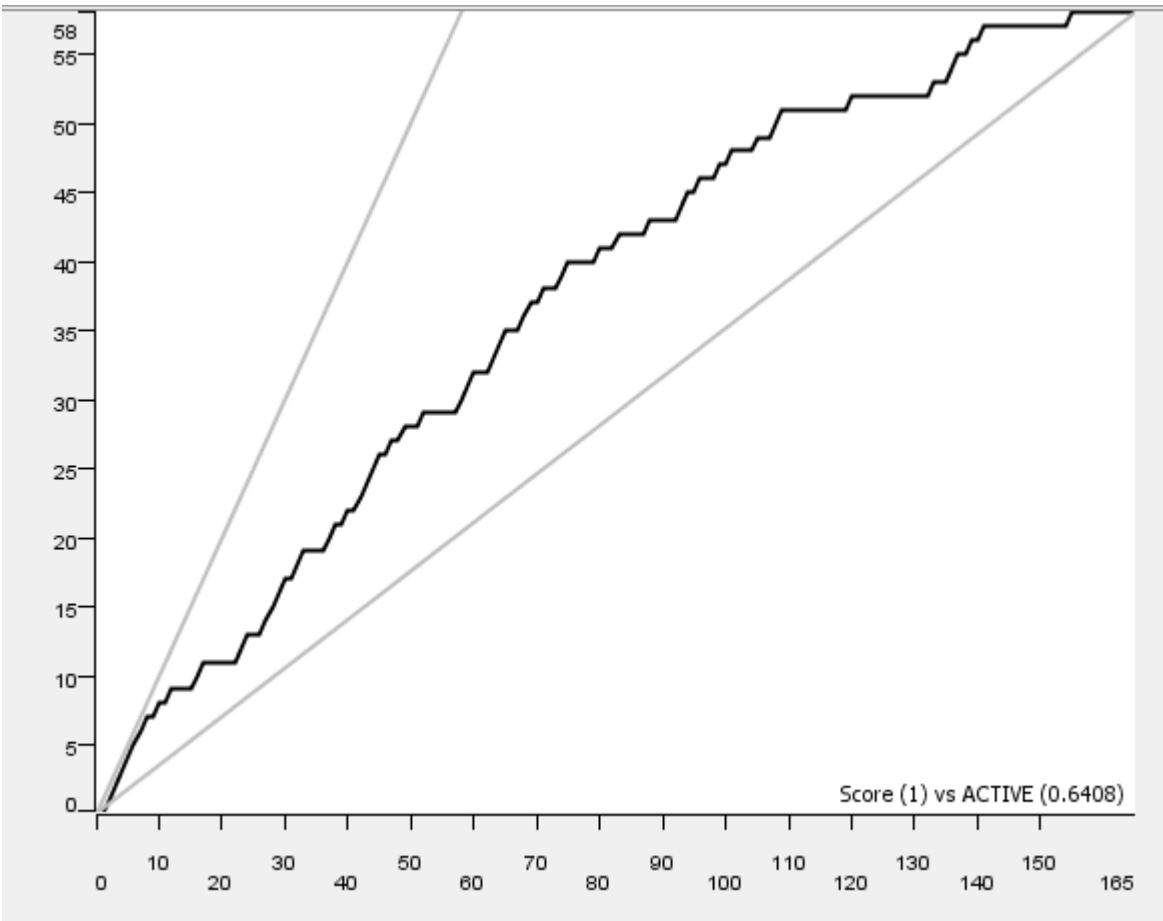

N=165

|                   |        |
|-------------------|--------|
| Top 10% Mean IC50 | 491 nM |
|-------------------|--------|

|          | Predicted Active | Predicted Inactive |
|----------|------------------|--------------------|
| Active   | 51               | 7                  |
| Inactive | 63               | 44                 |

# <50nM DefGood in MEK1, 40% error

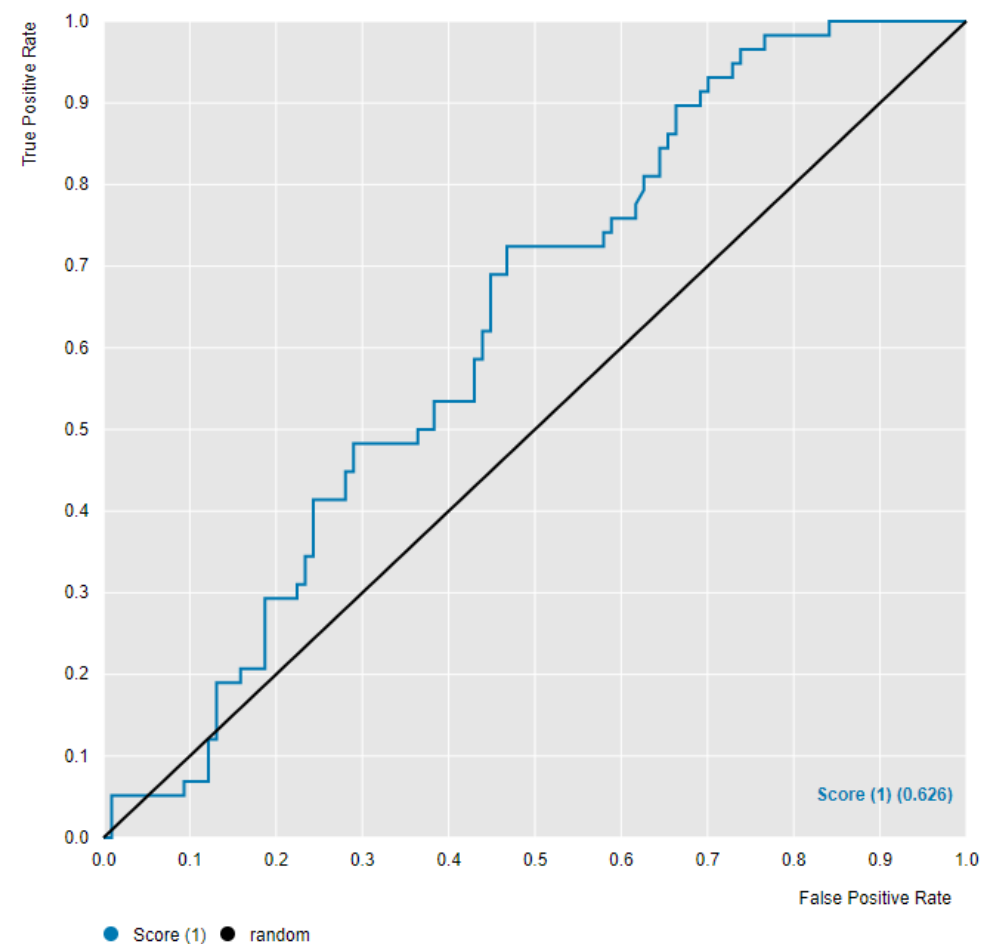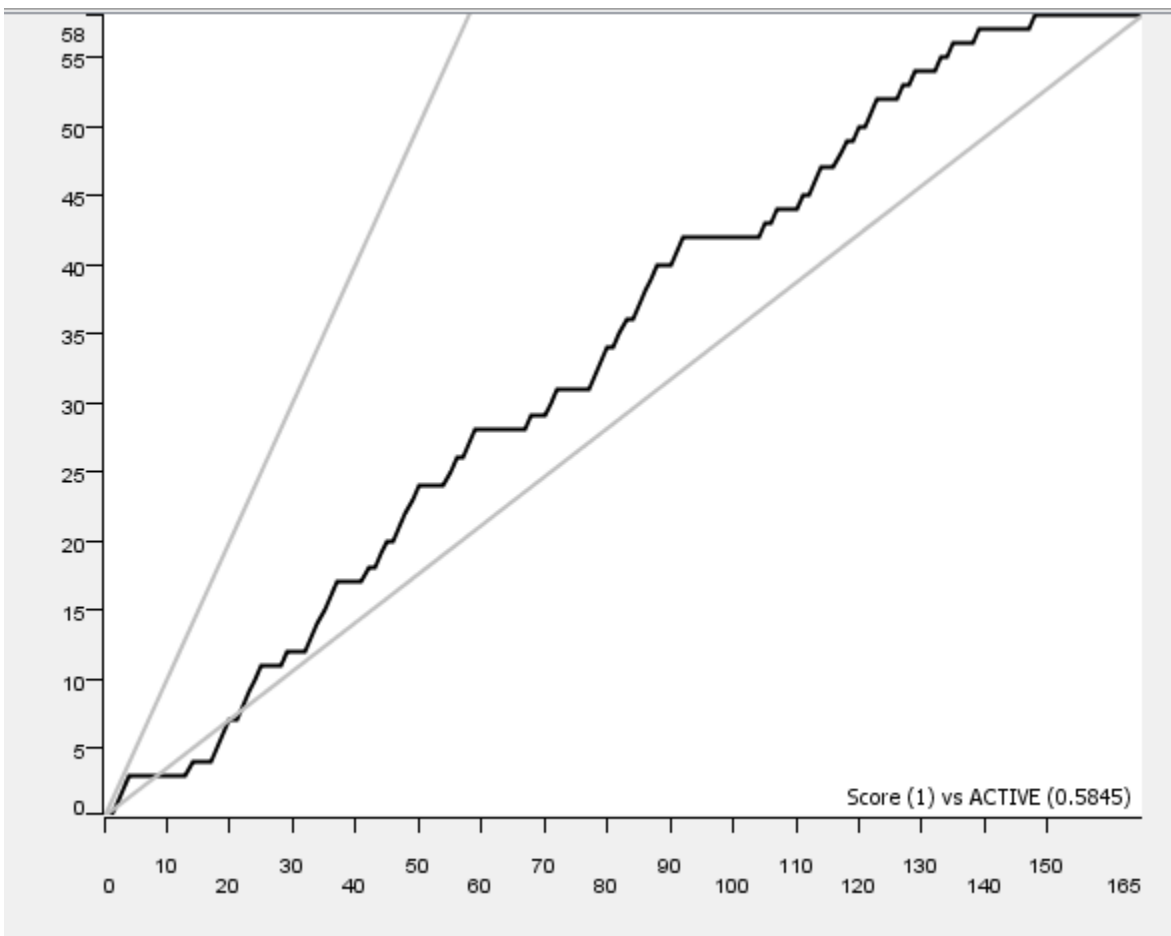

N=165

|                   |          |
|-------------------|----------|
| Top 10% Mean IC50 | 3,700 nM |
|-------------------|----------|

|          | Predicted Active | Predicted Inactive |
|----------|------------------|--------------------|
| Active   | 42               | 16                 |
| Inactive | 54               | 53                 |

<50nM DefGood in MEK1, 20% error;  
Random seed = 429

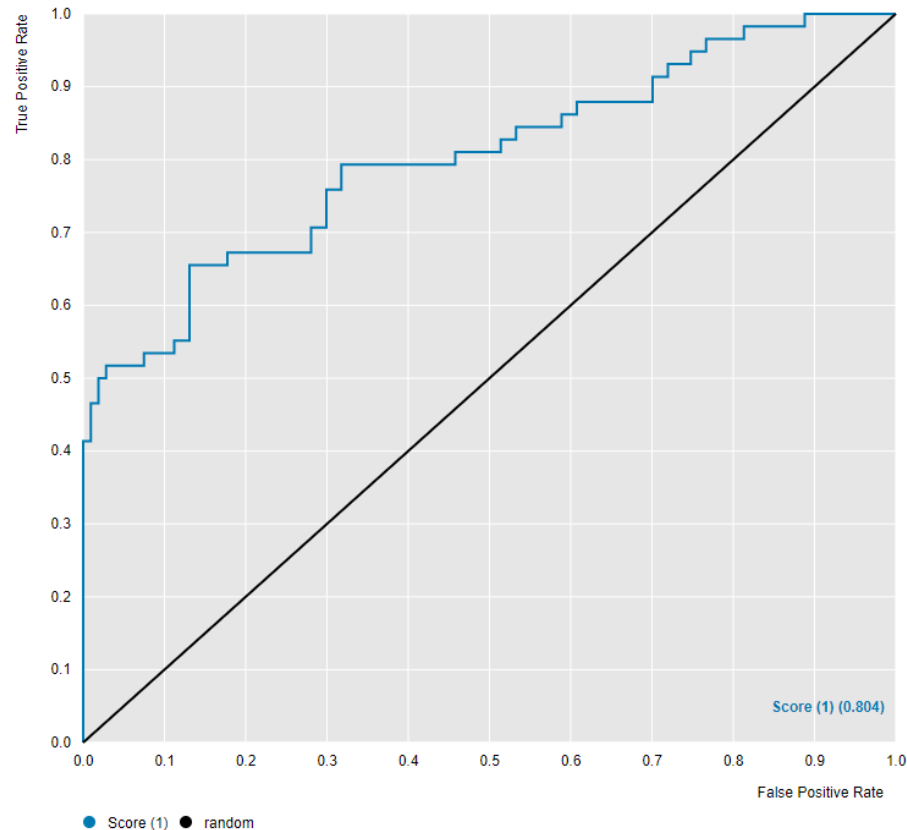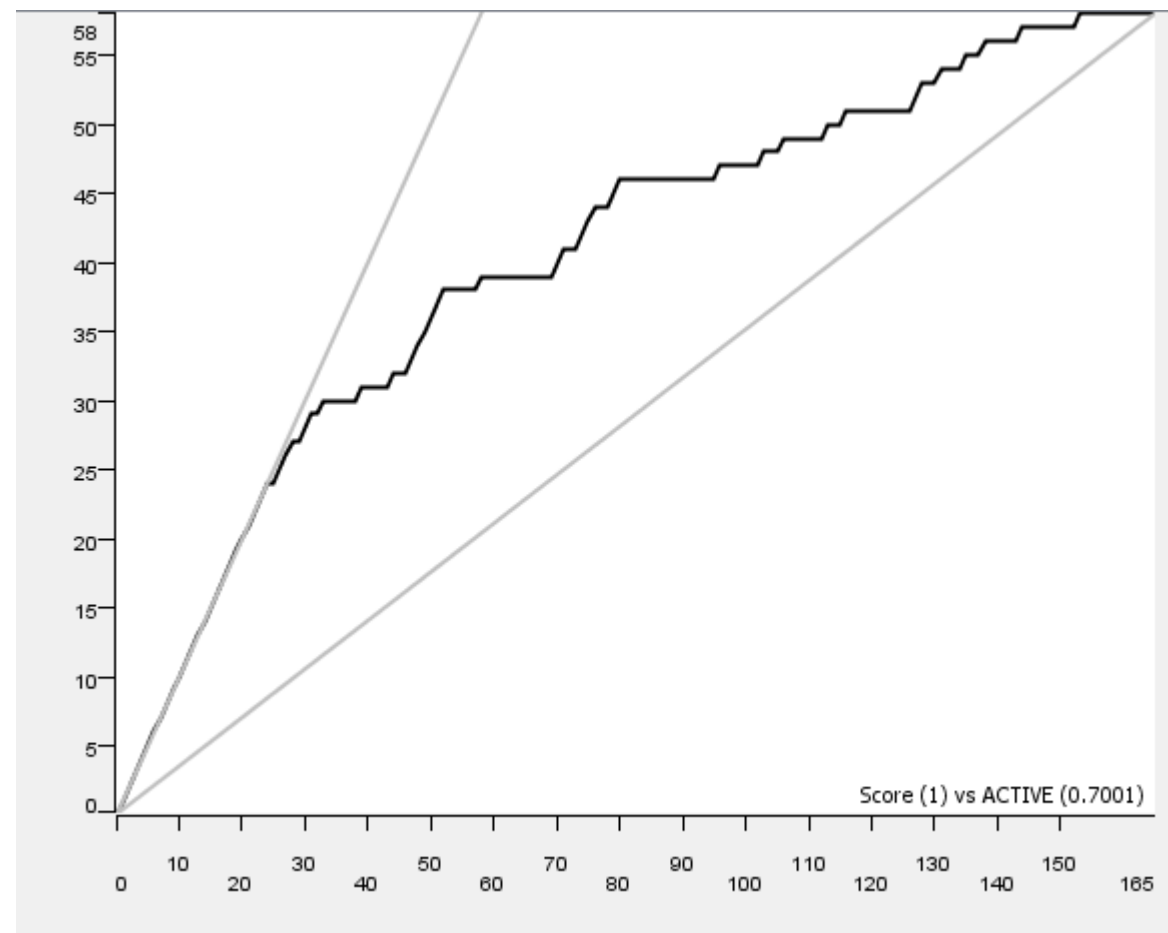

N=165

Top 10% Mean  
IC50

22.6 nM

|          | Predicted Active | Predicted Inactive |
|----------|------------------|--------------------|
| Active   | 40               | 18                 |
| Inactive | 30               | 77                 |

<50nM DefGood in MEK1, 30% error;  
Random seed = 429

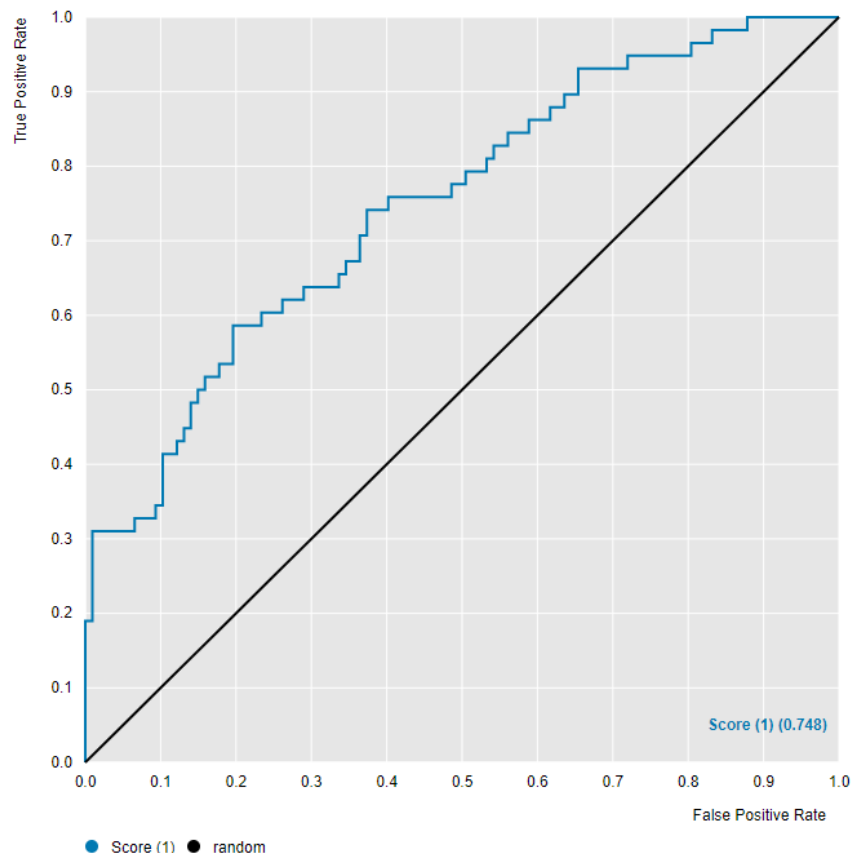

N=165

|                      |         |
|----------------------|---------|
| Top 10% Mean<br>IC50 | 59.8 nM |
|----------------------|---------|

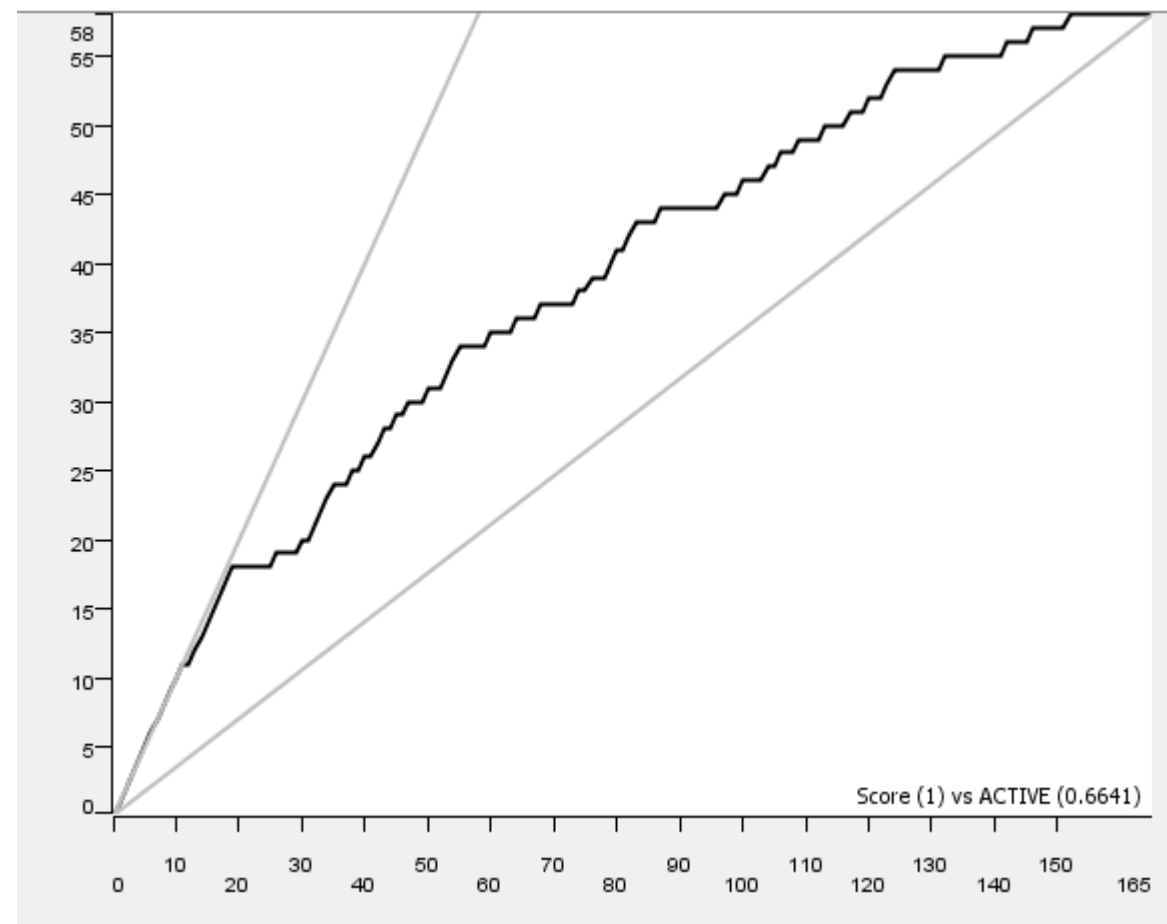

|          | Predicted Active | Predicted Inactive |
|----------|------------------|--------------------|
| Active   | 40               | 18                 |
| Inactive | 39               | 68                 |



<50nM DefGood in MEK1, 35% error;  
Random seed = 429

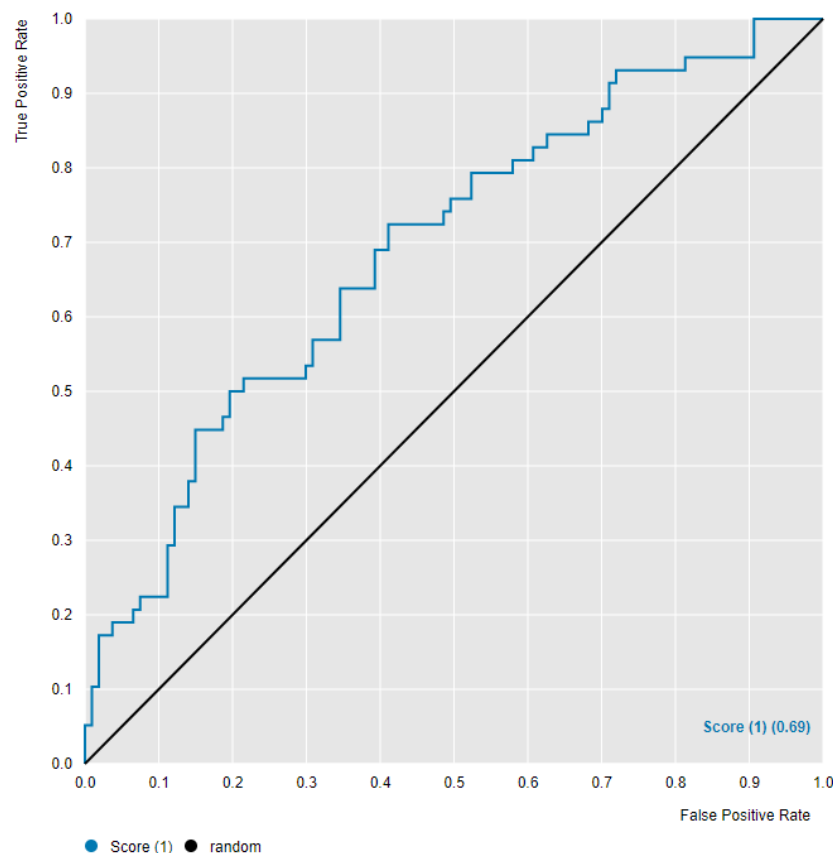

N=165

Top 10% Mean  
IC50

96.0 nM

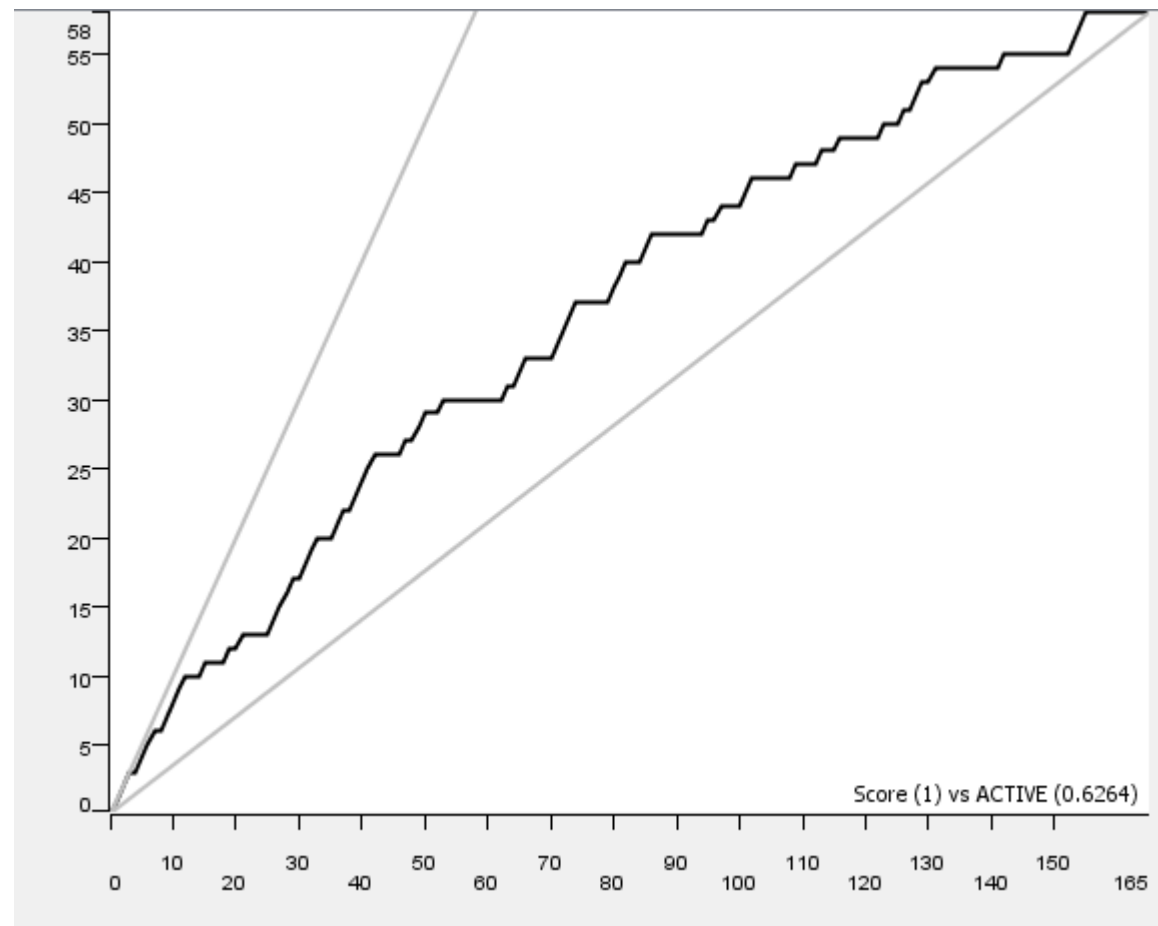

|          | Predicted Active | Predicted Inactive |
|----------|------------------|--------------------|
| Active   | 41               | 17                 |
| Inactive | 44               | 63                 |

<50nM DefGood in MEK1, 40% error;  
Random seed = 429

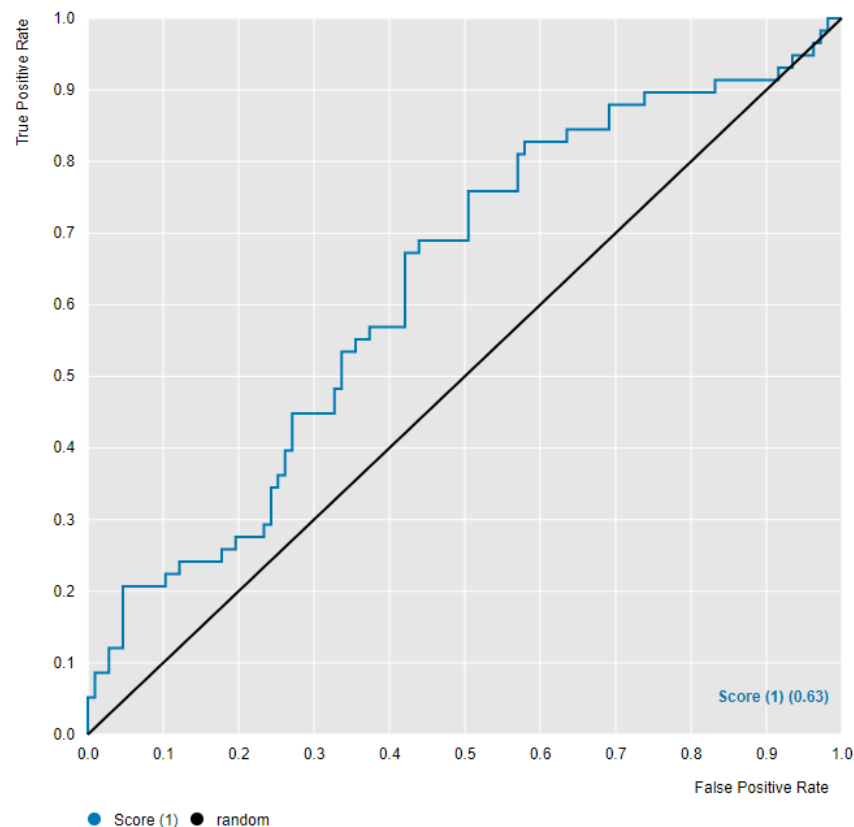

N=165

Top 10% Mean  
IC50

69.0 nM

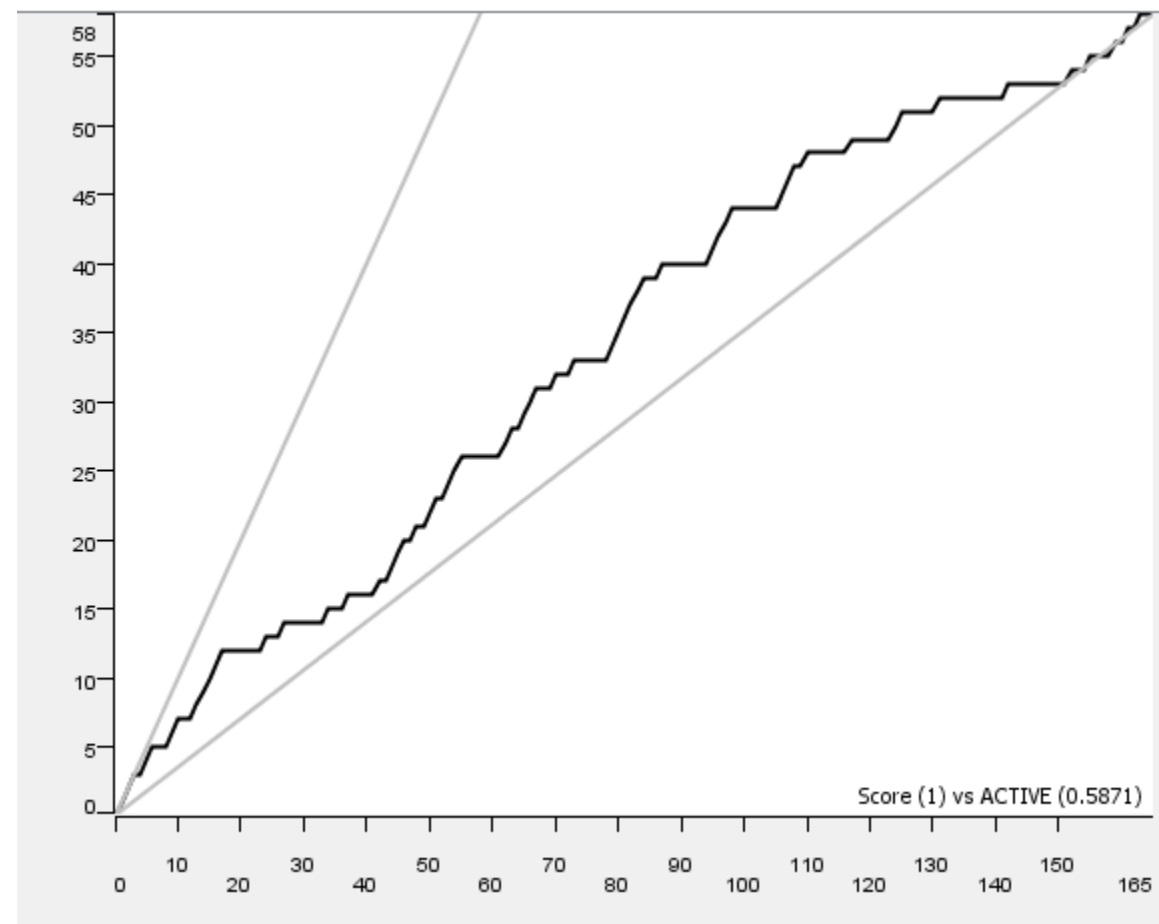

|          | Predicted Active | Predicted Inactive |
|----------|------------------|--------------------|
| Active   | 55               | 3                  |
| Inactive | 100              | 7                  |

<50nM DefGood in MEK1, 20% error;  
Random seed = 121783

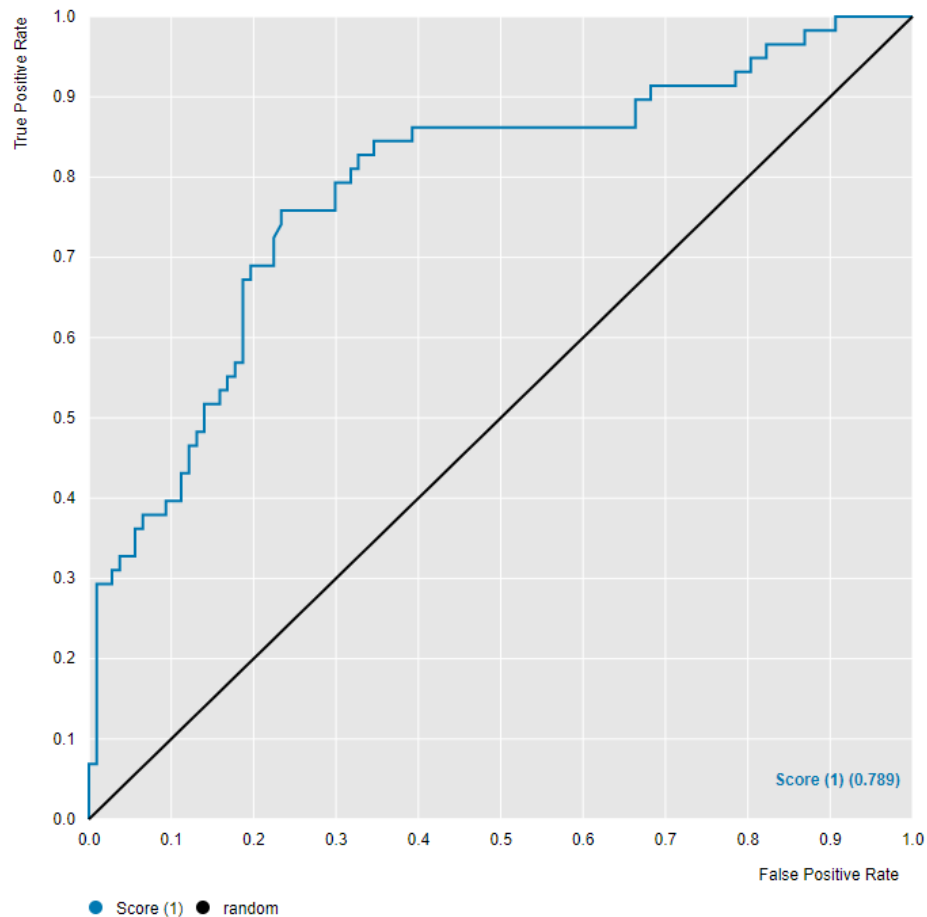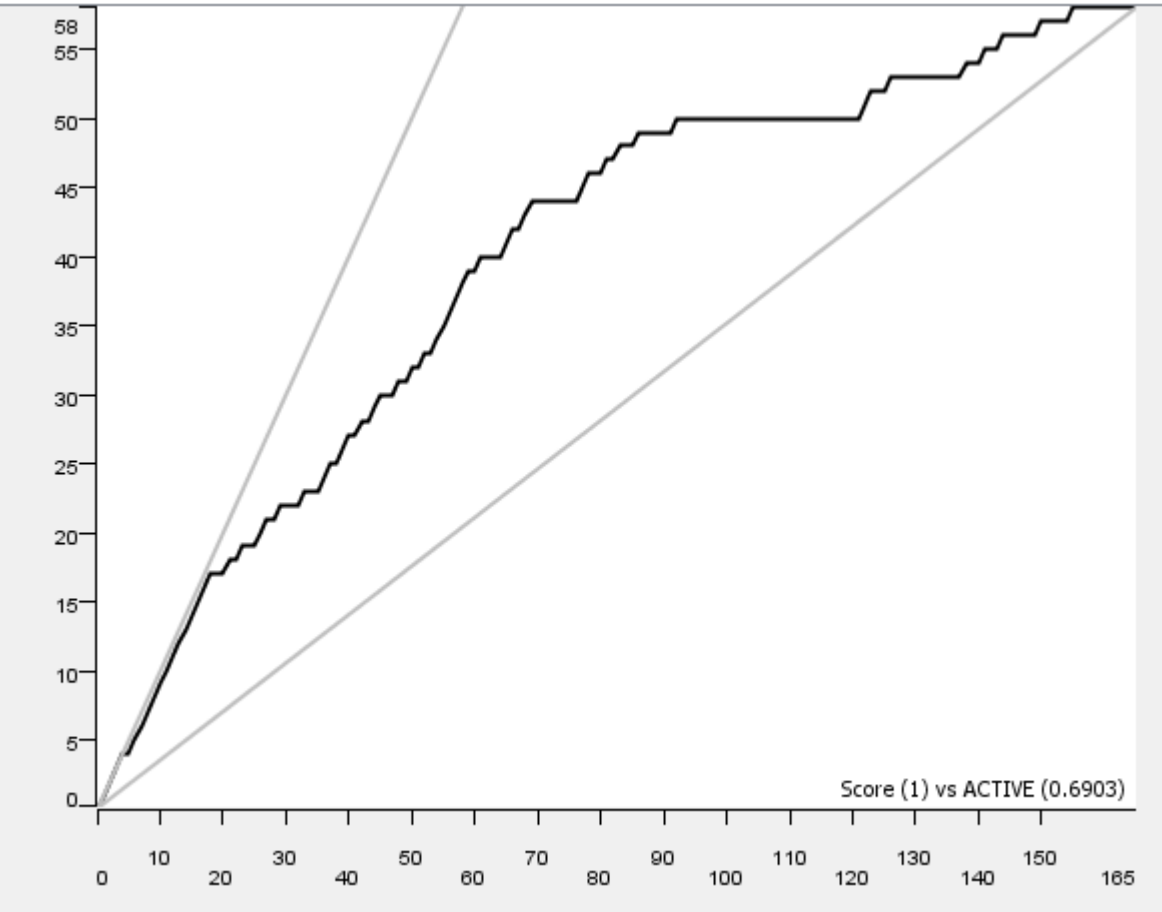

N=165

|                      |         |
|----------------------|---------|
| Top 10% Mean<br>IC50 | 20.8 nM |
|----------------------|---------|

|          | Predicted Active | Predicted Inactive |
|----------|------------------|--------------------|
| Active   | 39               | 19                 |
| Inactive | 20               | 87                 |

<50nM DefGood in MEK1, 30% error;  
Random seed = 121783

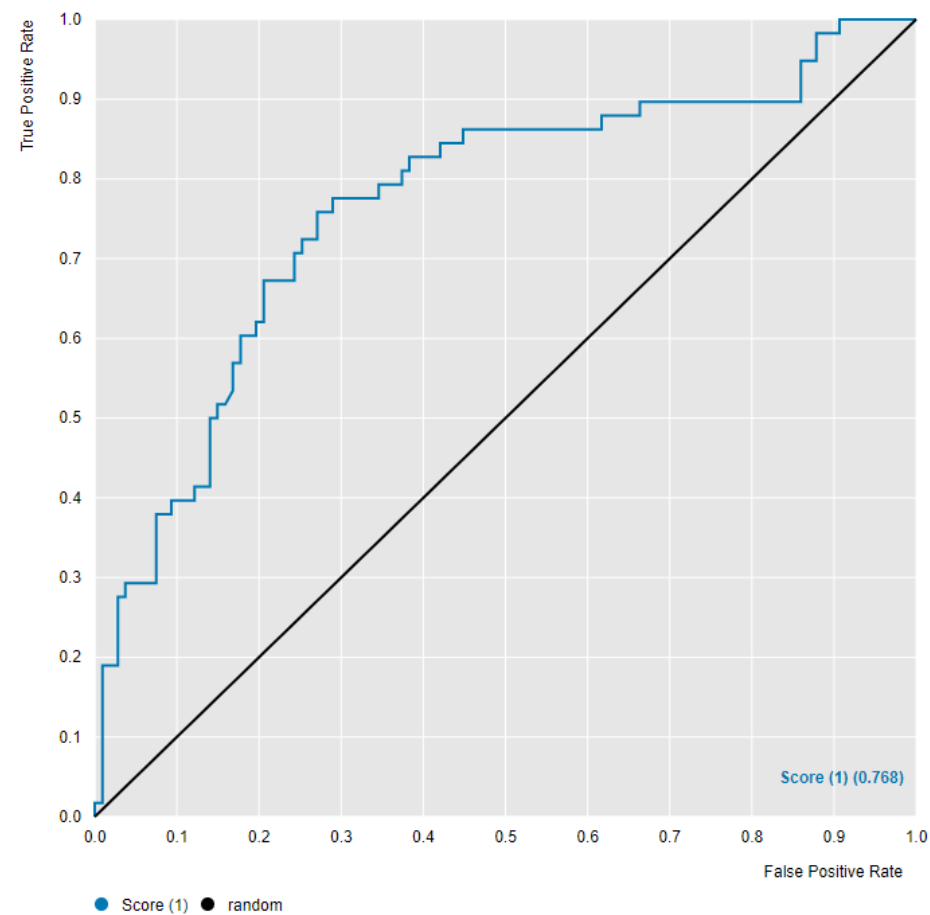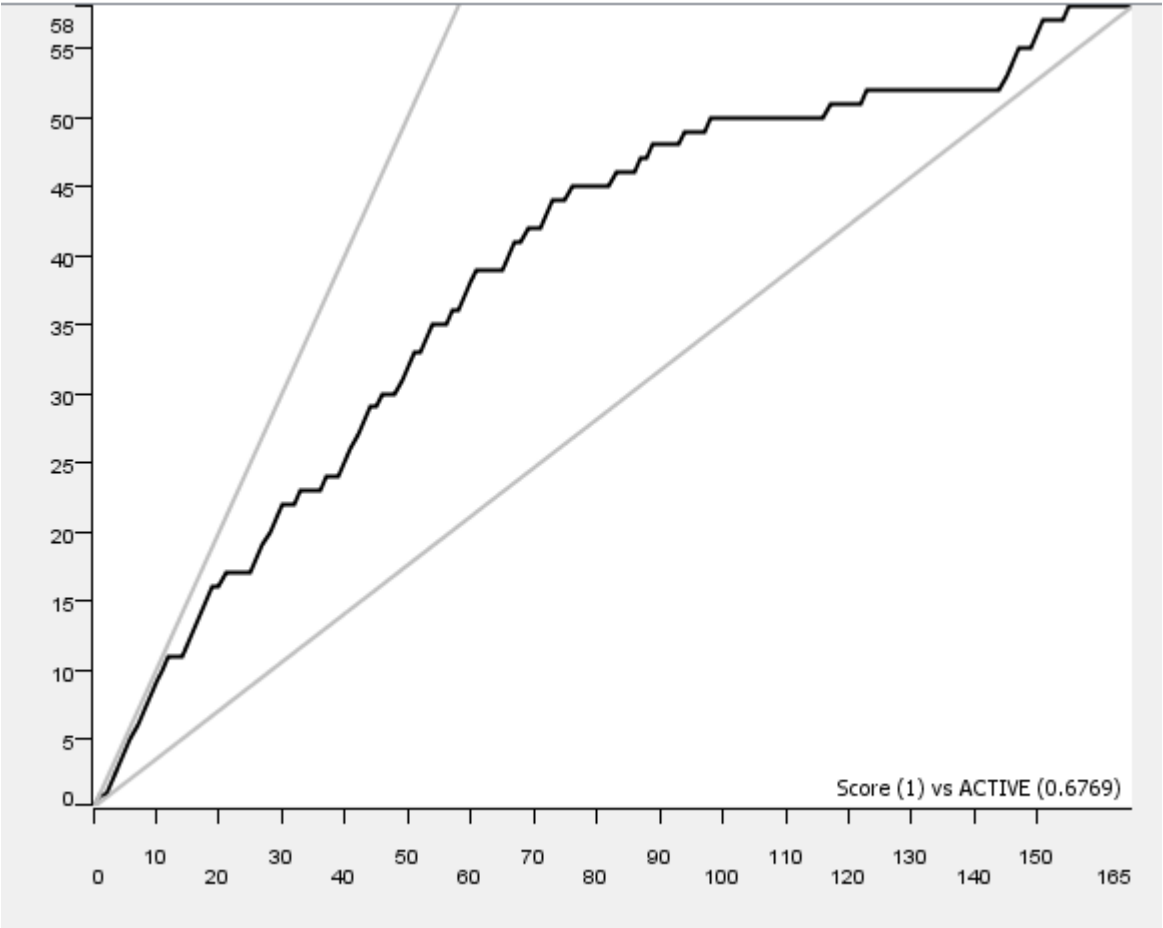

N=165

|                      |         |
|----------------------|---------|
| Top 10% Mean<br>IC50 | 40.6 nM |
|----------------------|---------|

|          | Predicted Active | Predicted Inactive |
|----------|------------------|--------------------|
| Active   | 44               | 14                 |
| Inactive | 29               | 78                 |

<50nM DefGood in MEK1, 35% error;  
Random seed = 121783

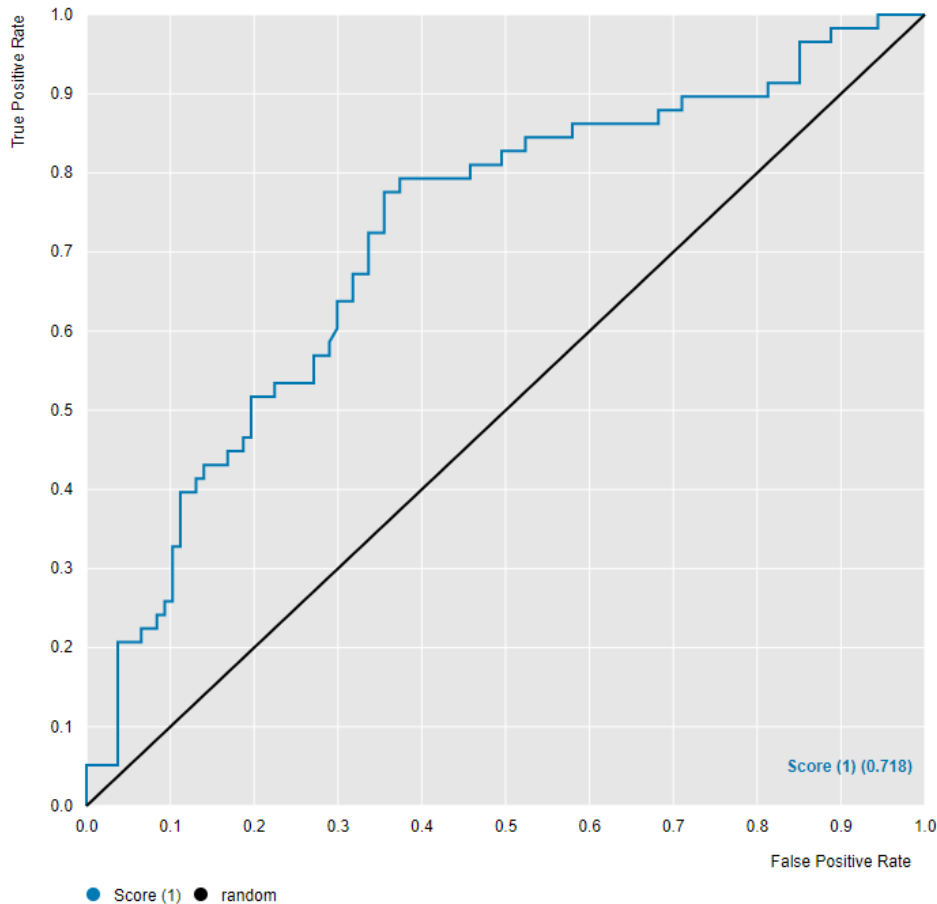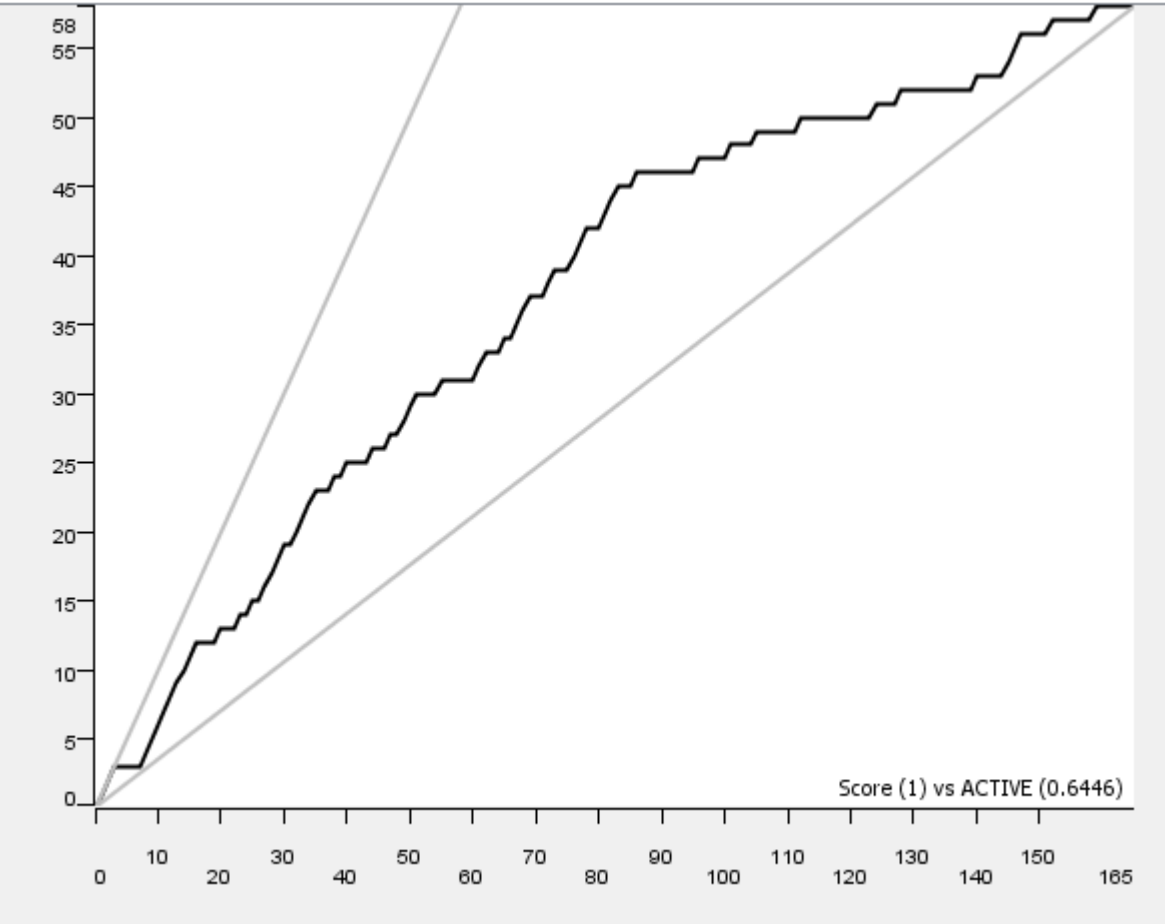

N=165

|                      |         |
|----------------------|---------|
| Top 10% Mean<br>IC50 | 45.5 nM |
|----------------------|---------|

|          | Predicted Active | Predicted Inactive |
|----------|------------------|--------------------|
| Active   | 49               | 9                  |
| Inactive | 56               | 51                 |

<50nM DefGood in MEK1, 40% error;  
Random seed = 121783

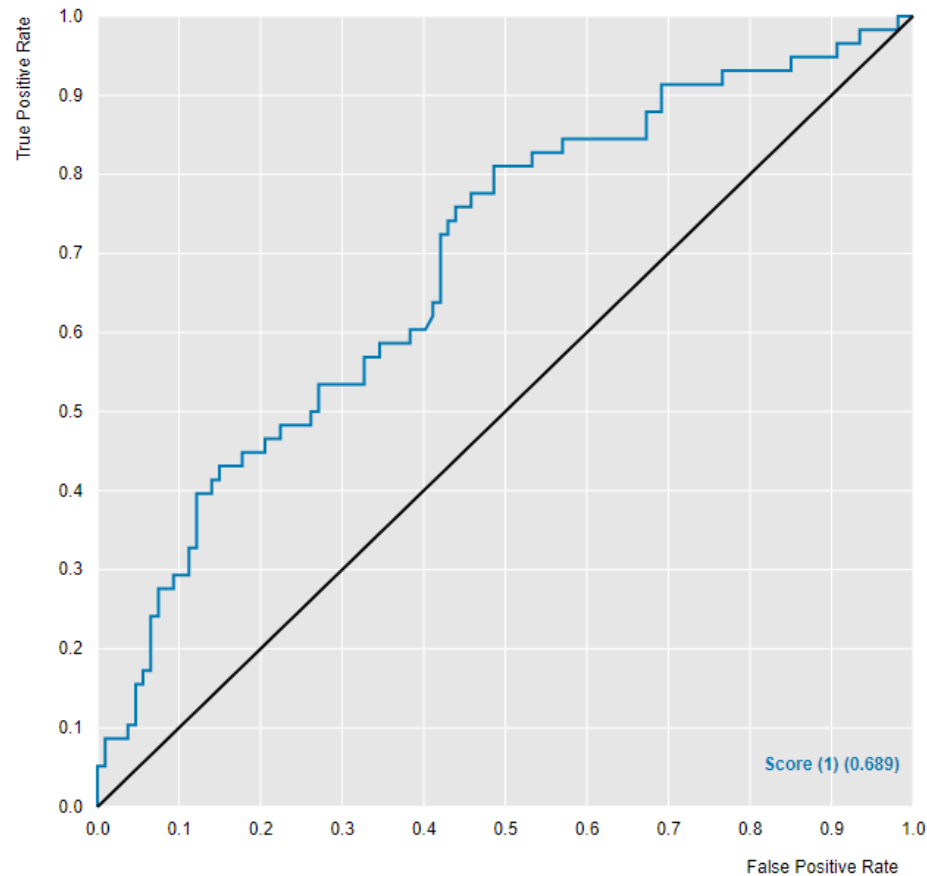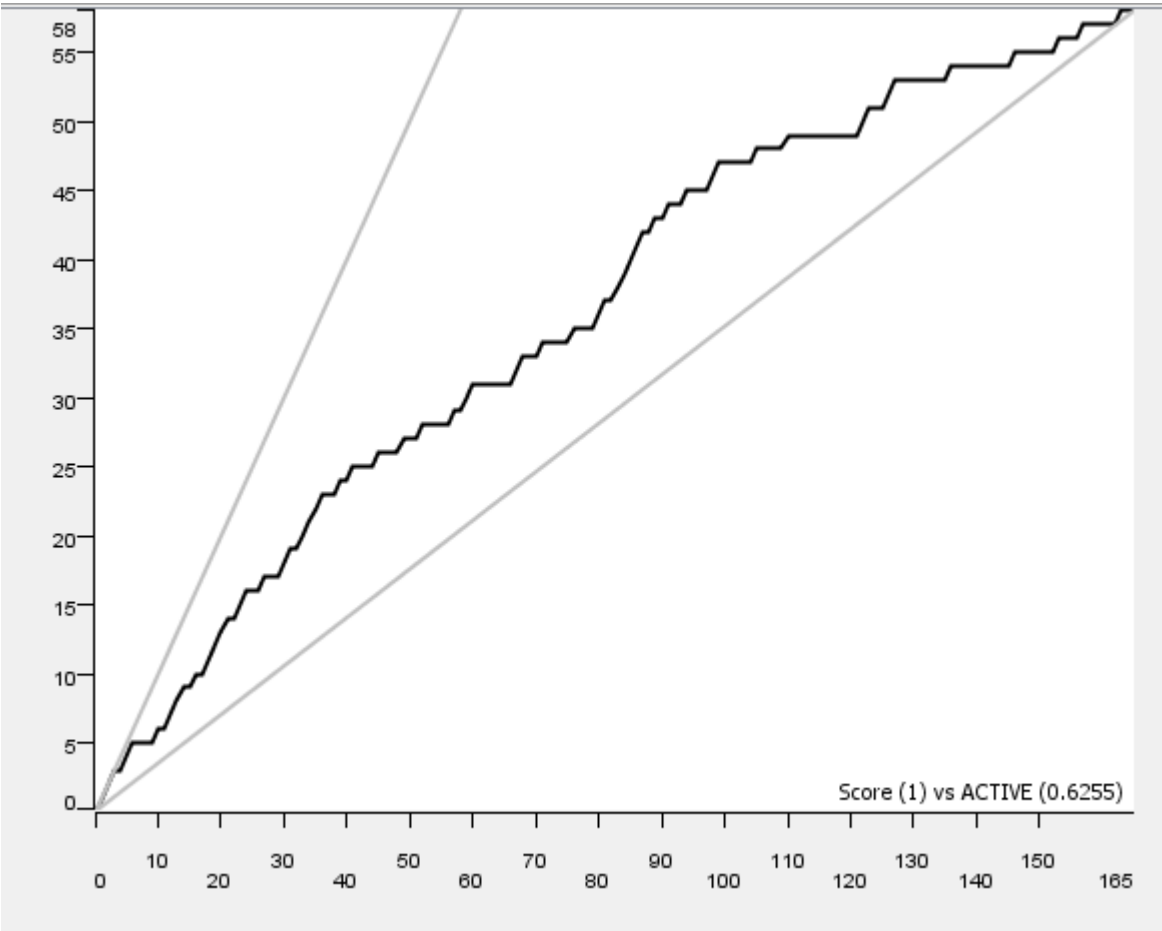

N=165

|                      |        |
|----------------------|--------|
| Top 10% Mean<br>IC50 | 104 nM |
|----------------------|--------|

|          | Predicted Active | Predicted Inactive |
|----------|------------------|--------------------|
| Active   | 49               | 9                  |
| Inactive | 70               | 37                 |

# Conclusion - NBN

- An NBN could be generated for MEK1 kinase with a decision value of <50 nM as defined as active. The predictivity of the algorithm could be preserved in three random train/test cycles. The point of failure was 40%, 35% and 40% error.

# RF Error Tolerance- <50 nM DefGood in MEK1

- 0-50% absolute error



# RF- <50nM DefGood in MEK1, 10% error

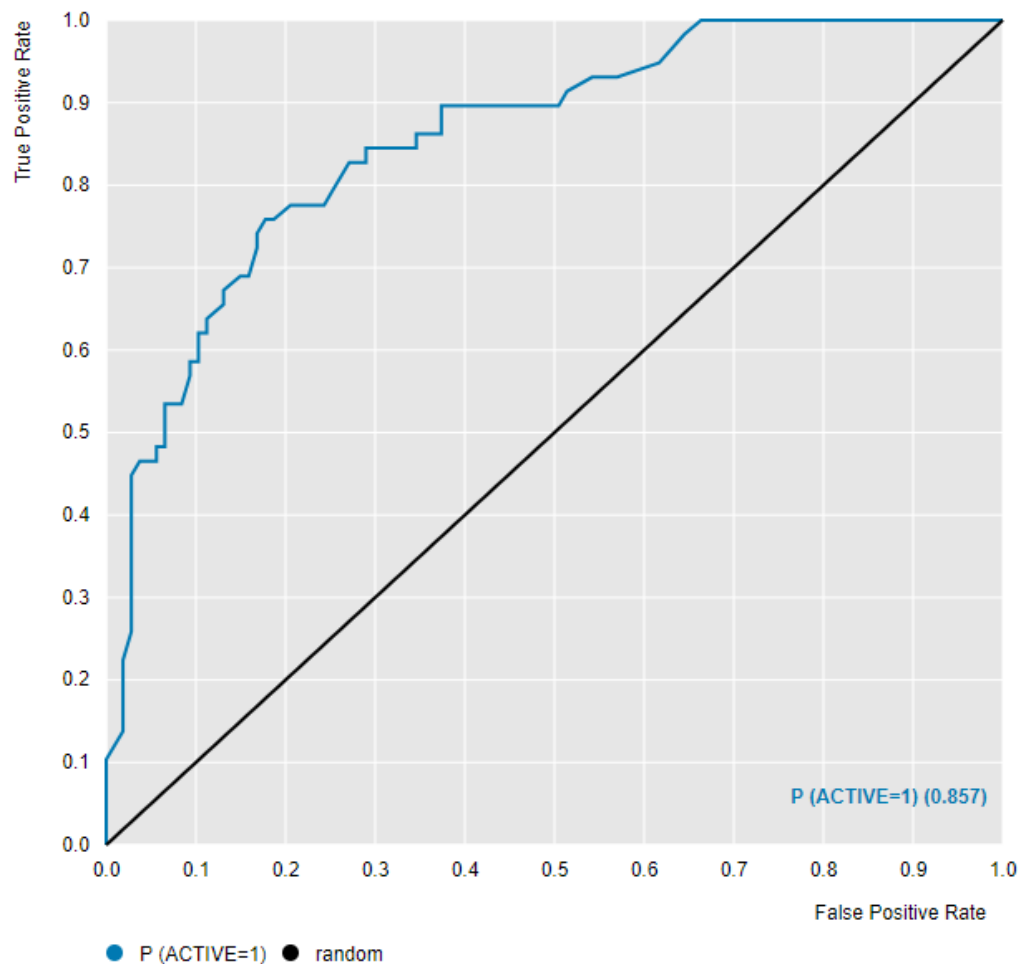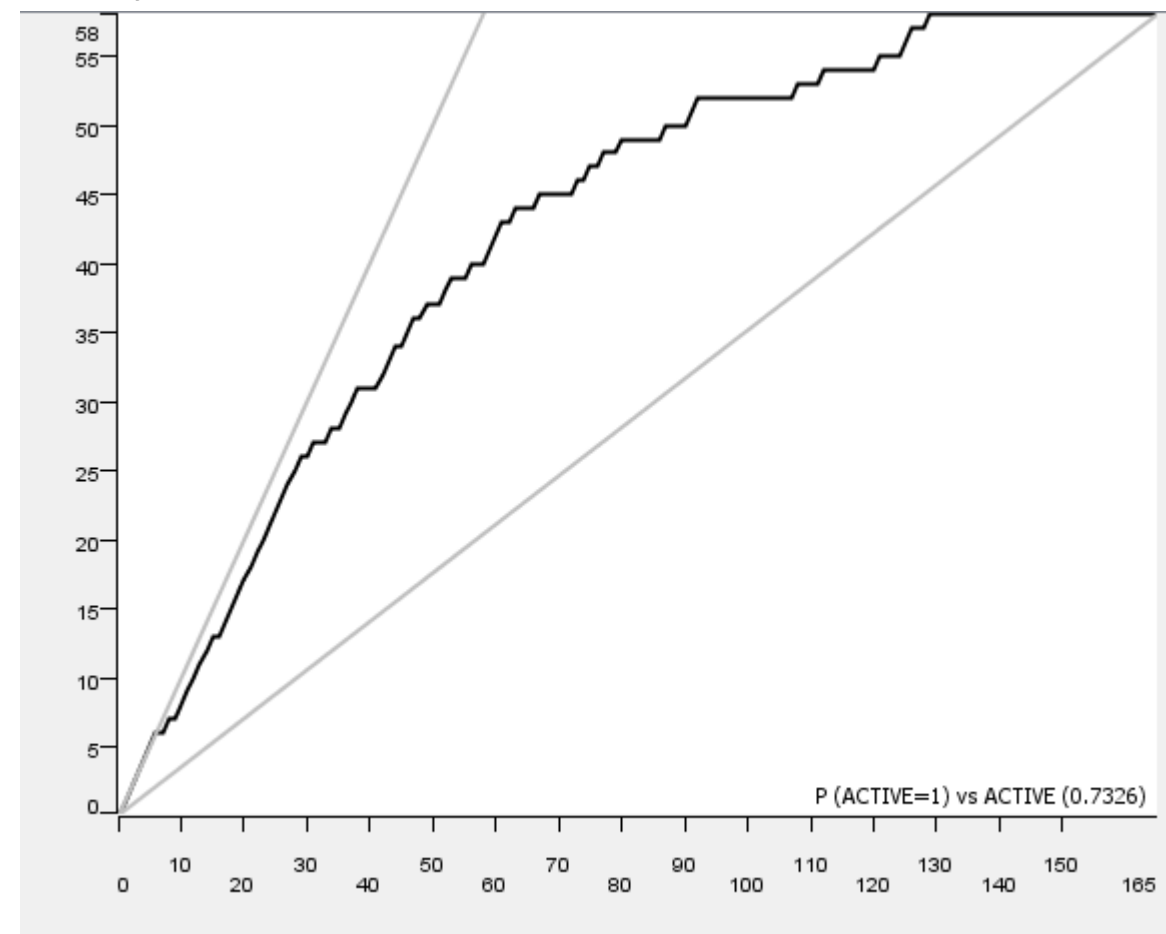

N=165

Top 10% Mean  
IC50

138nM  
One micromolar  
mistake

|          | Predicted Active | Predicted Inactive |
|----------|------------------|--------------------|
| Active   | 40               | 18                 |
| Inactive | 16               | 91                 |

# RF- <50nM DefGood in MEK1, 20% error

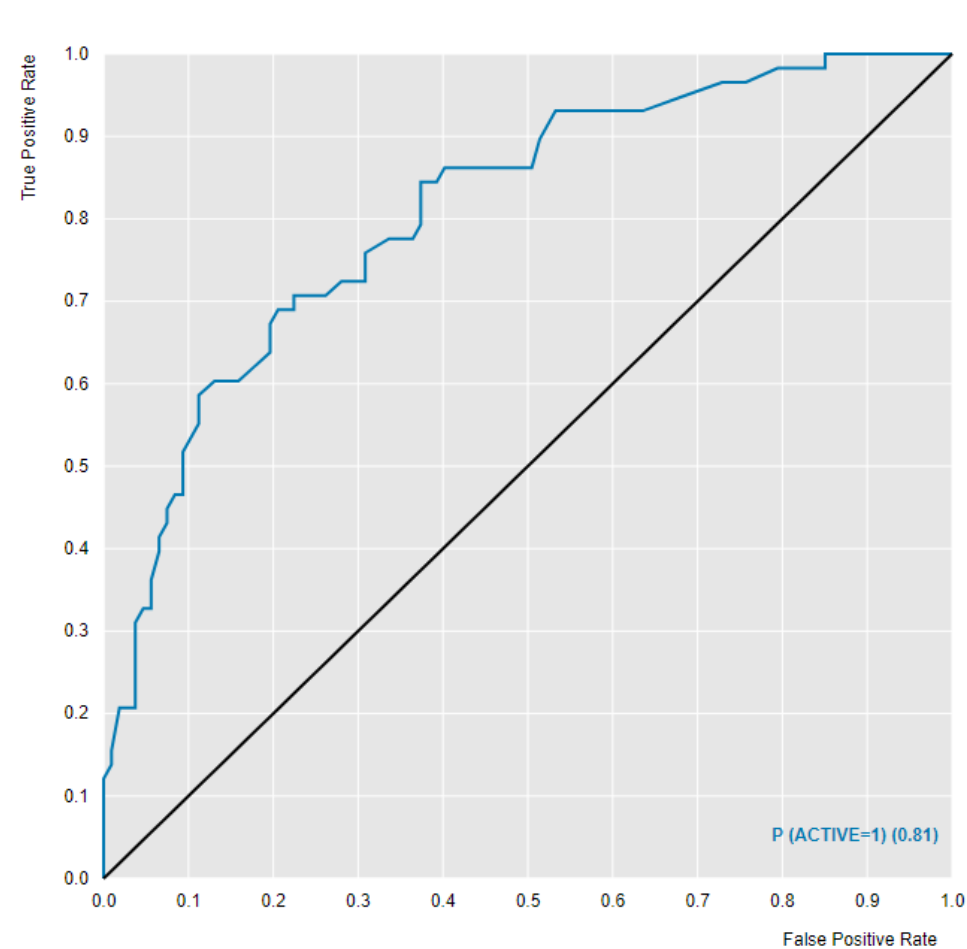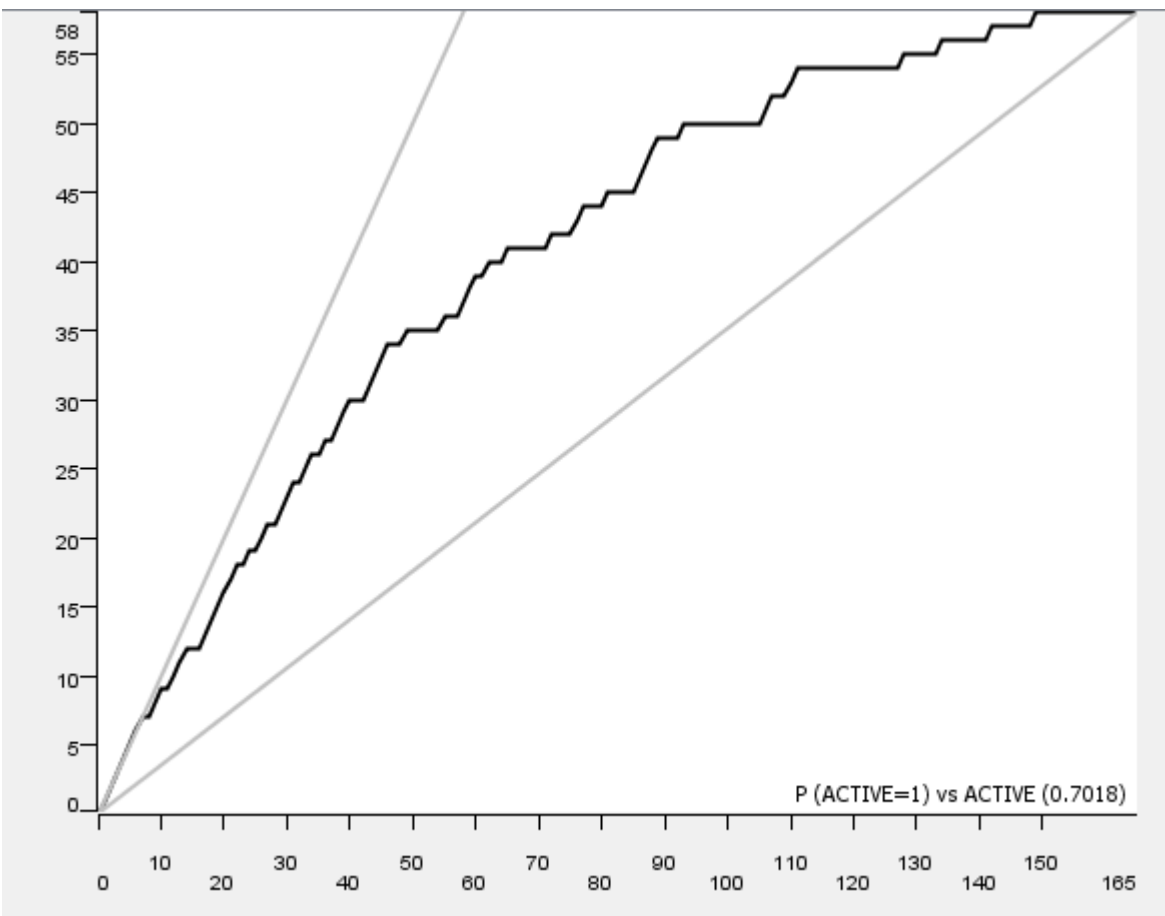

N=165

● P (ACTIVE=1) ● random

|                   |        |
|-------------------|--------|
| Top 10% Mean IC50 | 148 nM |
|-------------------|--------|

|          | Predicted Active | Predicted Inactive |
|----------|------------------|--------------------|
| Active   | 39               | 19                 |
| Inactive | 21               | 86                 |

# RF- <50nM DefGood in MEK1, 25% error

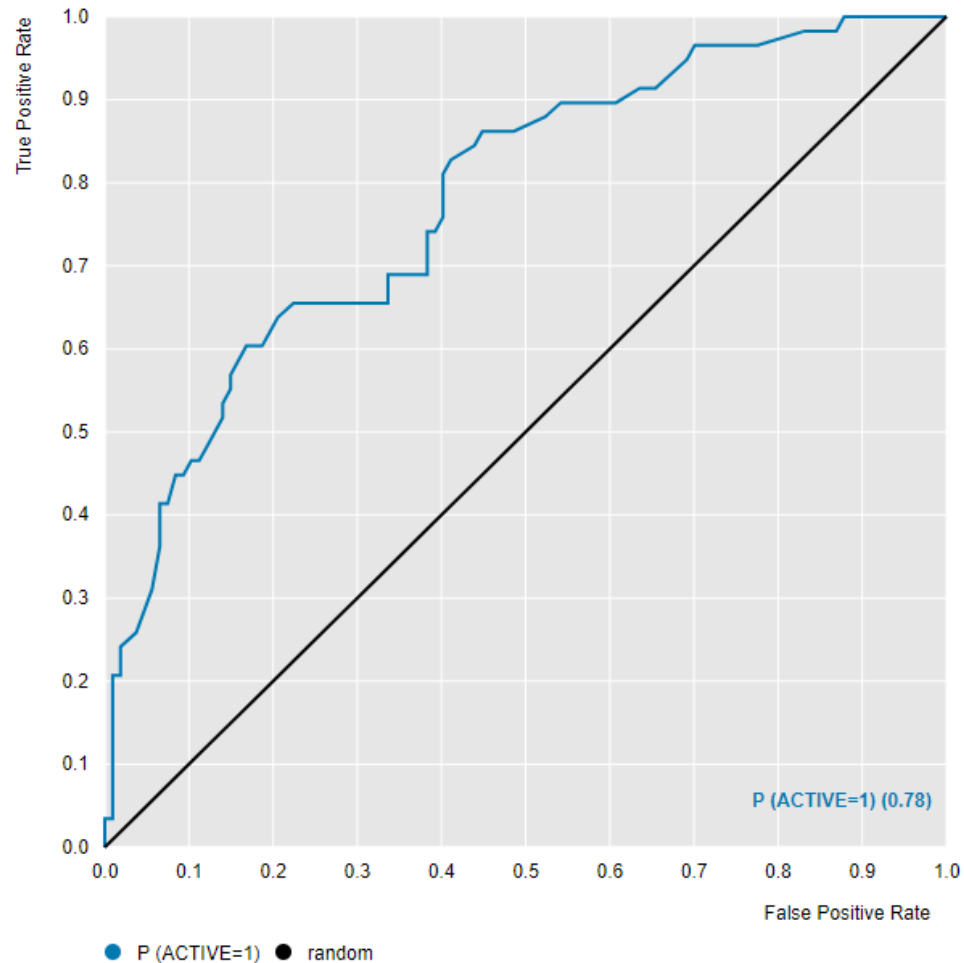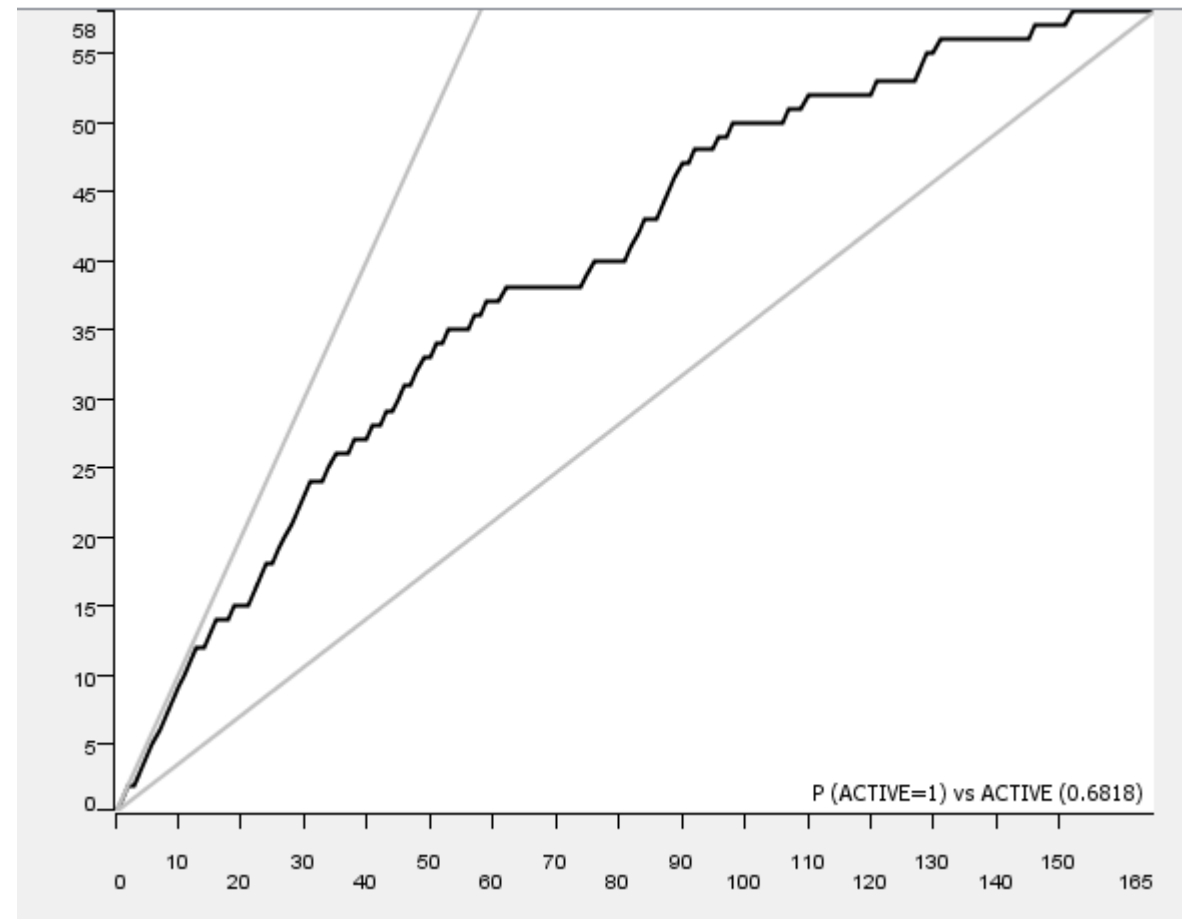

N=165

Top 10% Mean  
IC50

76.9 nM

|          | Predicted Active | Predicted Inactive |
|----------|------------------|--------------------|
| Active   | 36               | 22                 |
| Inactive | 21               | 86                 |

# RF- <50nM DefGood in MEK1, 30% error

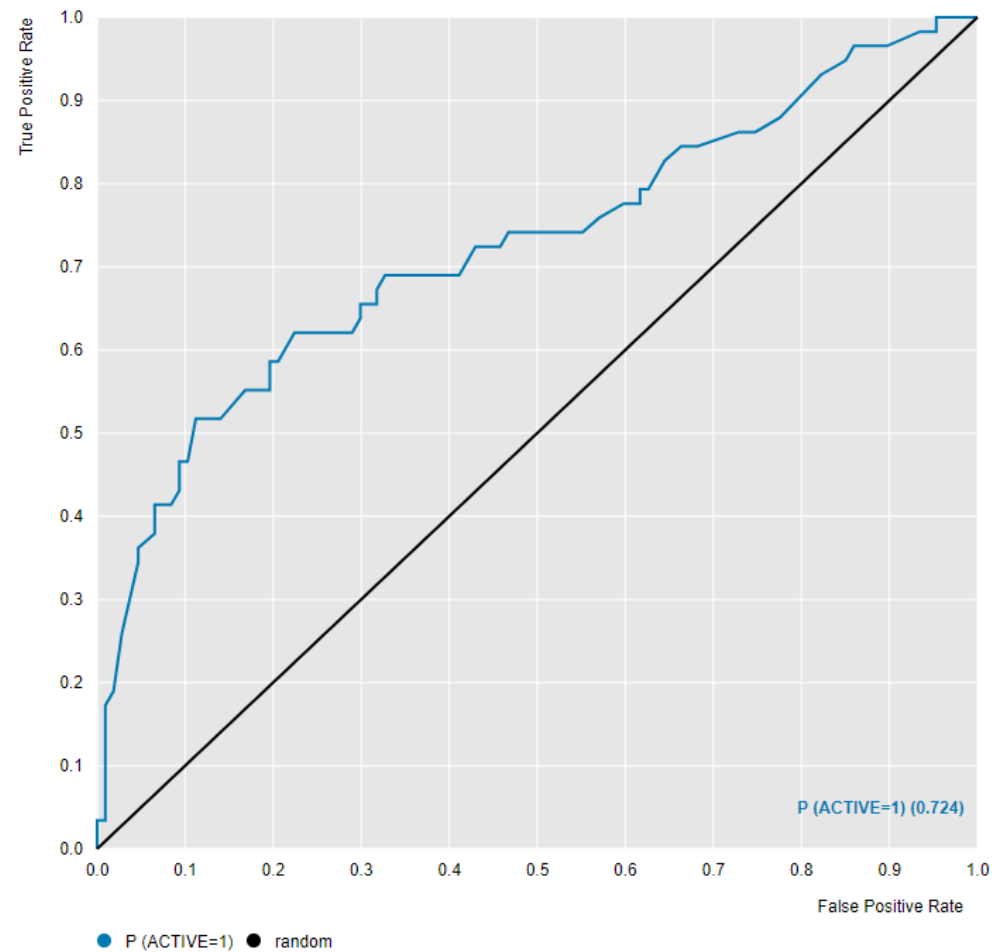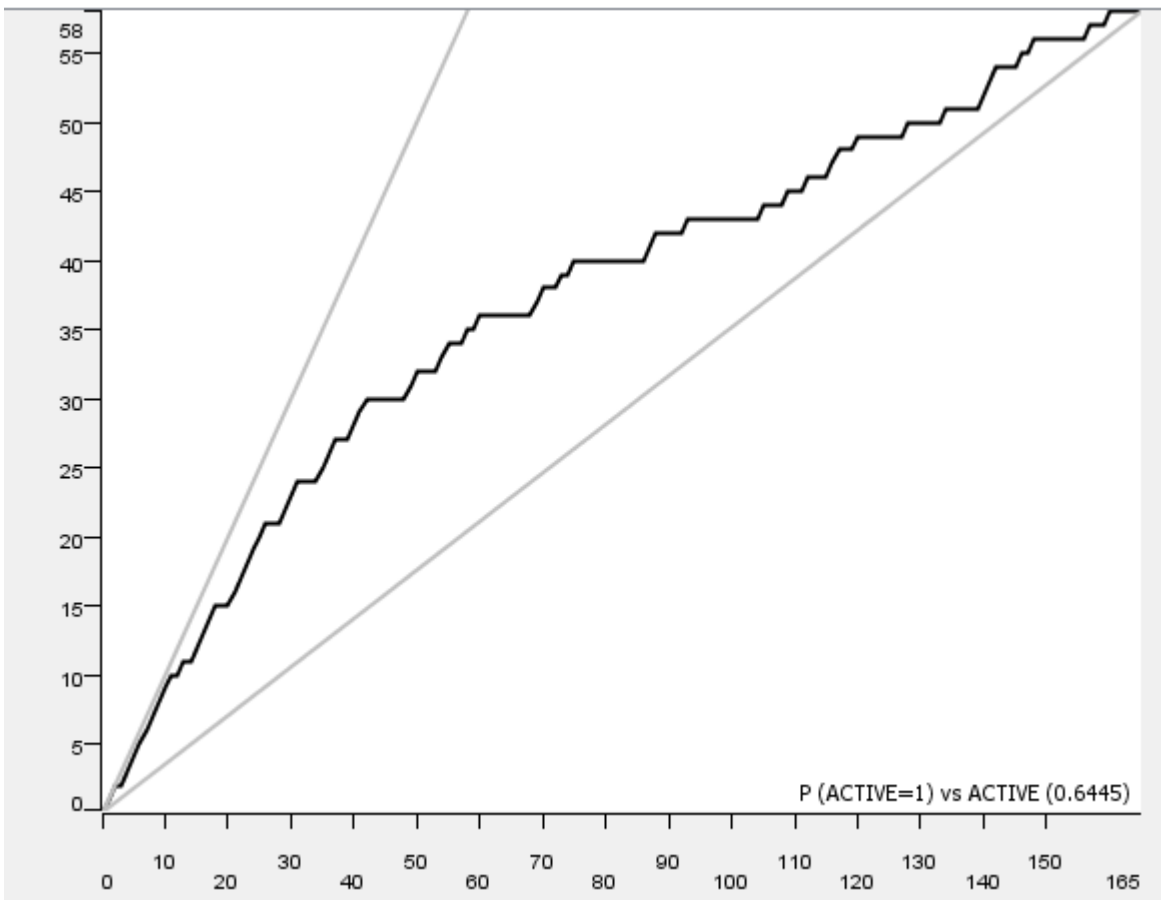

N=165

|                   |          |
|-------------------|----------|
| Top 10% Mean IC50 | 1,200 nM |
|-------------------|----------|

|          | Predicted Active | Predicted Inactive |
|----------|------------------|--------------------|
| Active   | 36               | 22                 |
| Inactive | 26               | 81                 |

<50nM DefGood in MEK1, 10% error;  
Random seed = 429

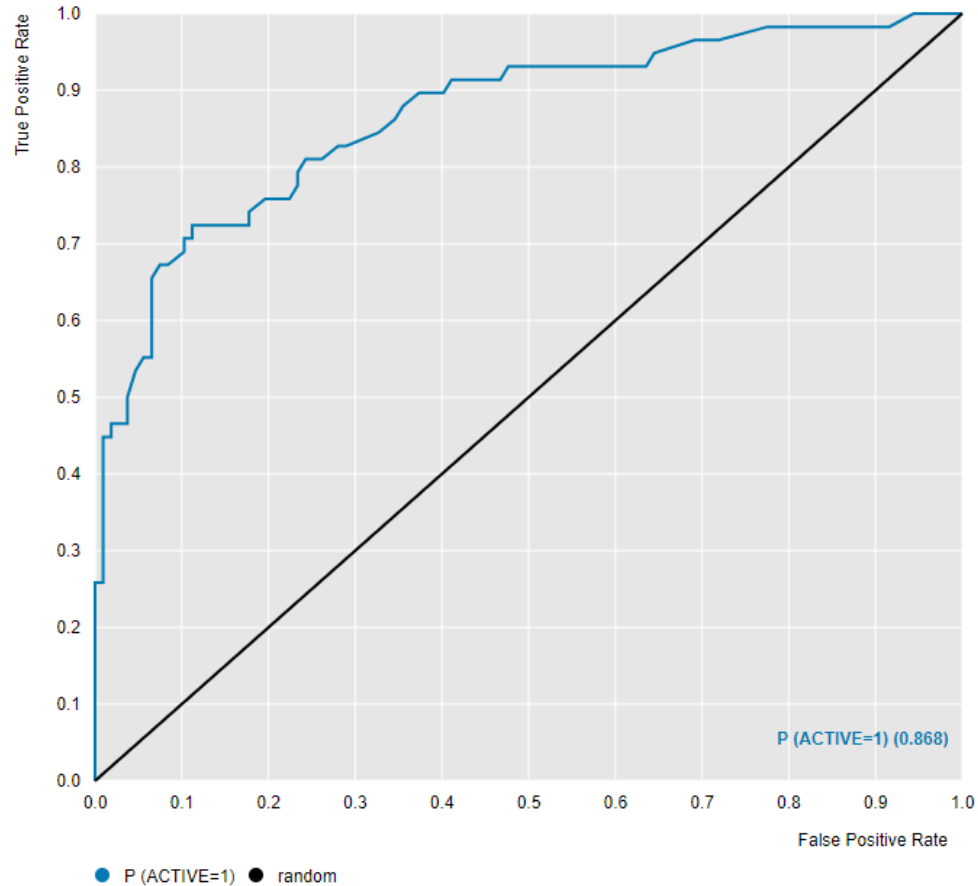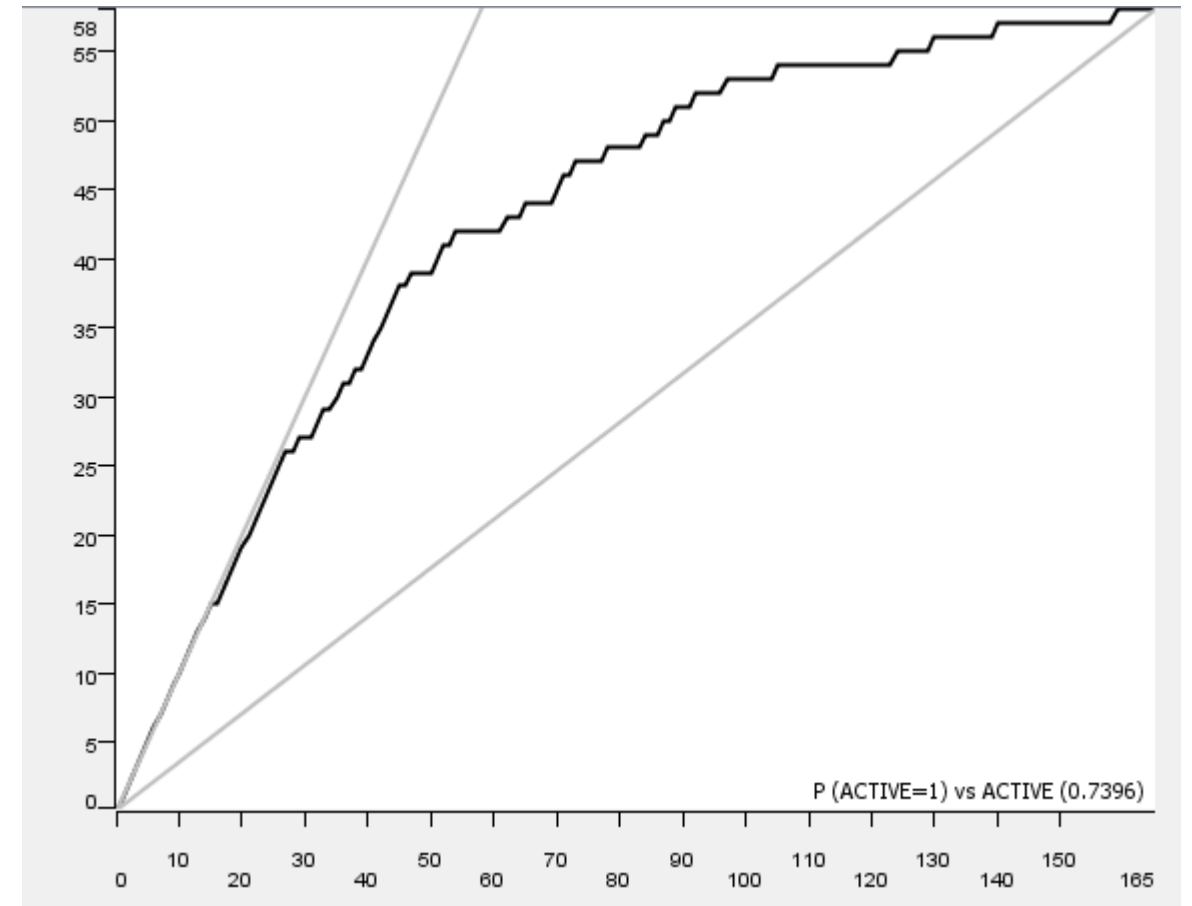

N=165

| Top 10% Mean<br>IC50 | 38.5 nM |
|----------------------|---------|
|----------------------|---------|

|          | Predicted Active | Predicted Inactive |
|----------|------------------|--------------------|
| Active   | 40               | 18                 |
| Inactive | 11               | 96                 |

<50nM DefGood in MEK1, 20% error;  
Random seed = 429

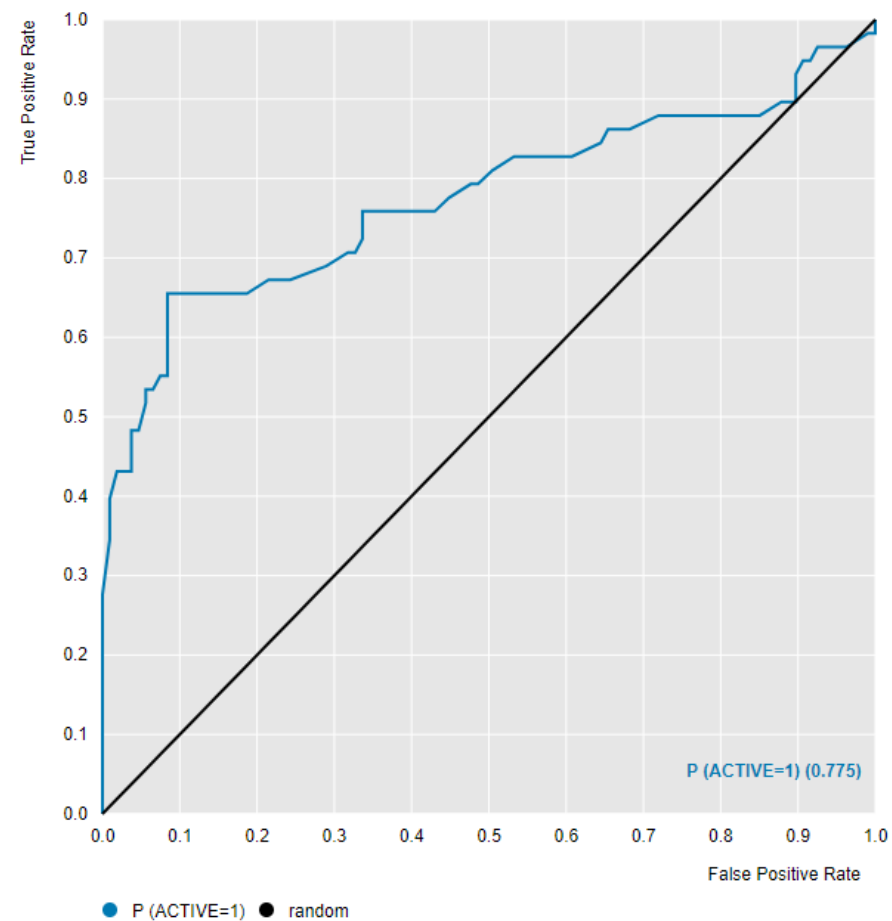

N=165

| Top 10% Mean IC50 | 20.3 nM |
|-------------------|---------|
|-------------------|---------|

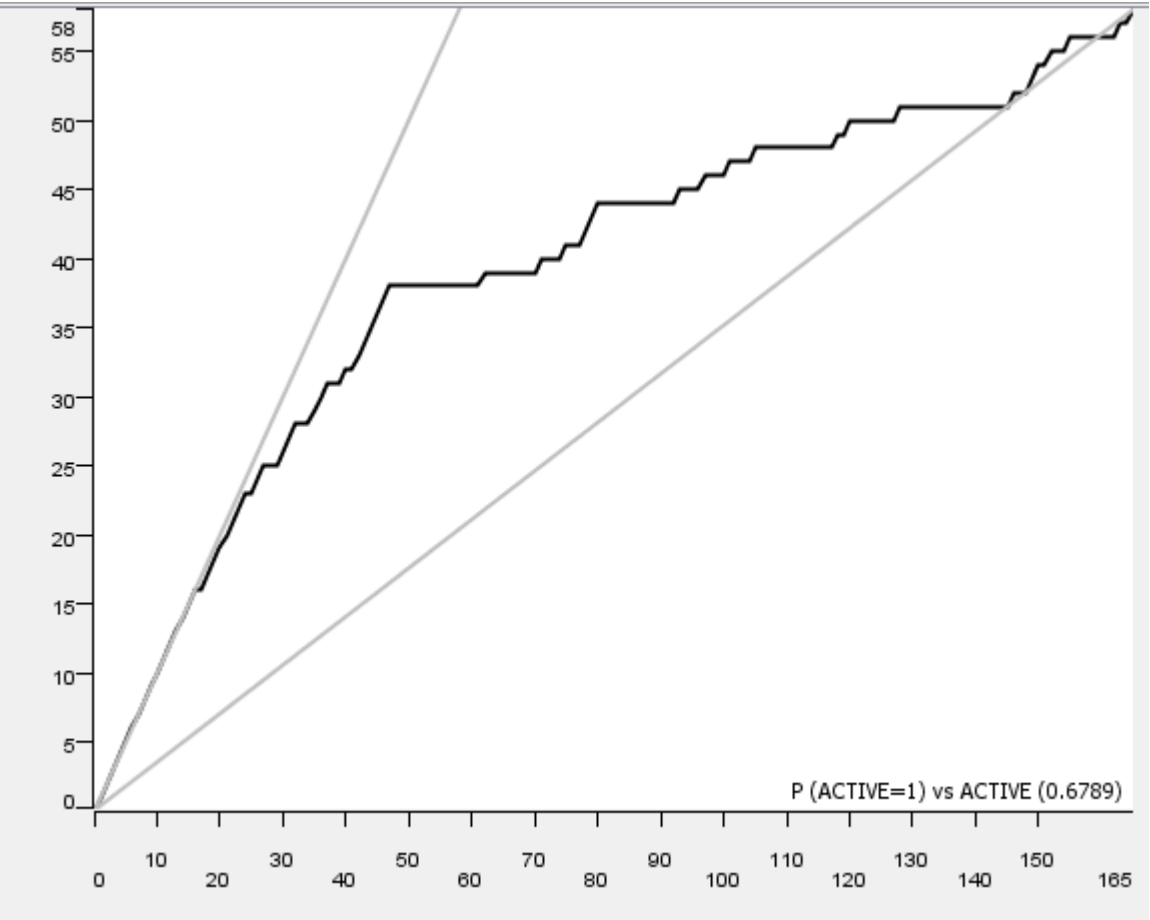

|          | Predicted Active | Predicted Inactive |
|----------|------------------|--------------------|
| Active   | 38               | 20                 |
| Inactive | 14               | 93                 |

<50nM DefGood in MEK1, 25% error;  
Random seed = 429

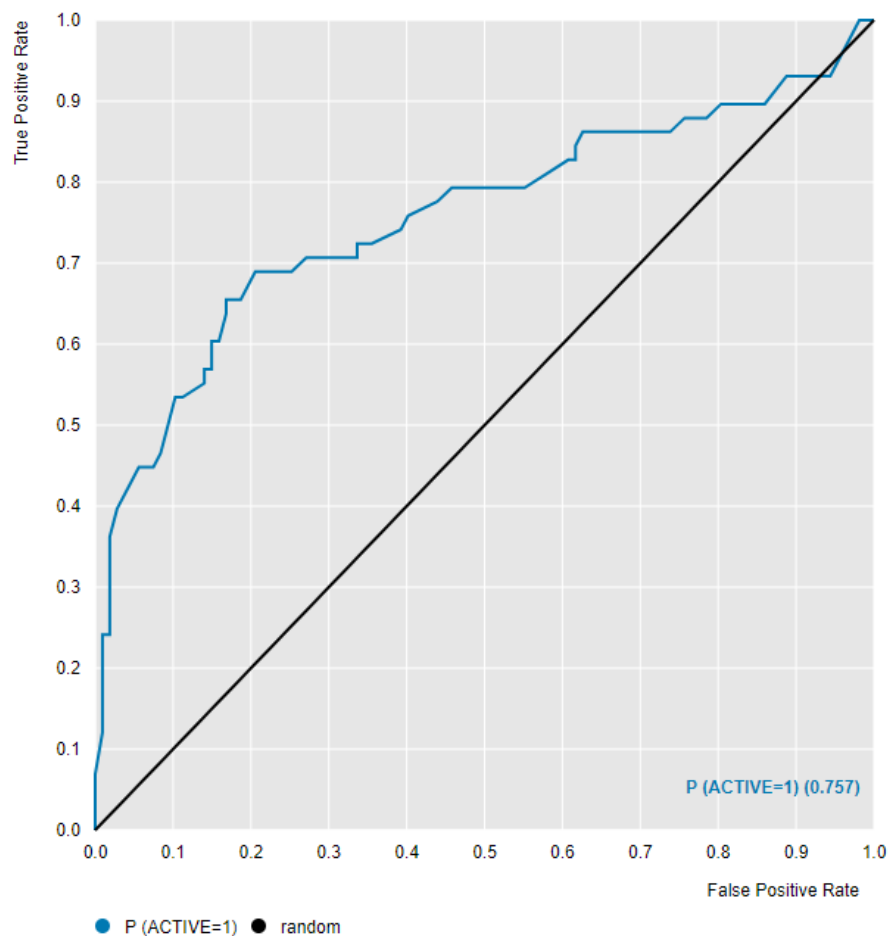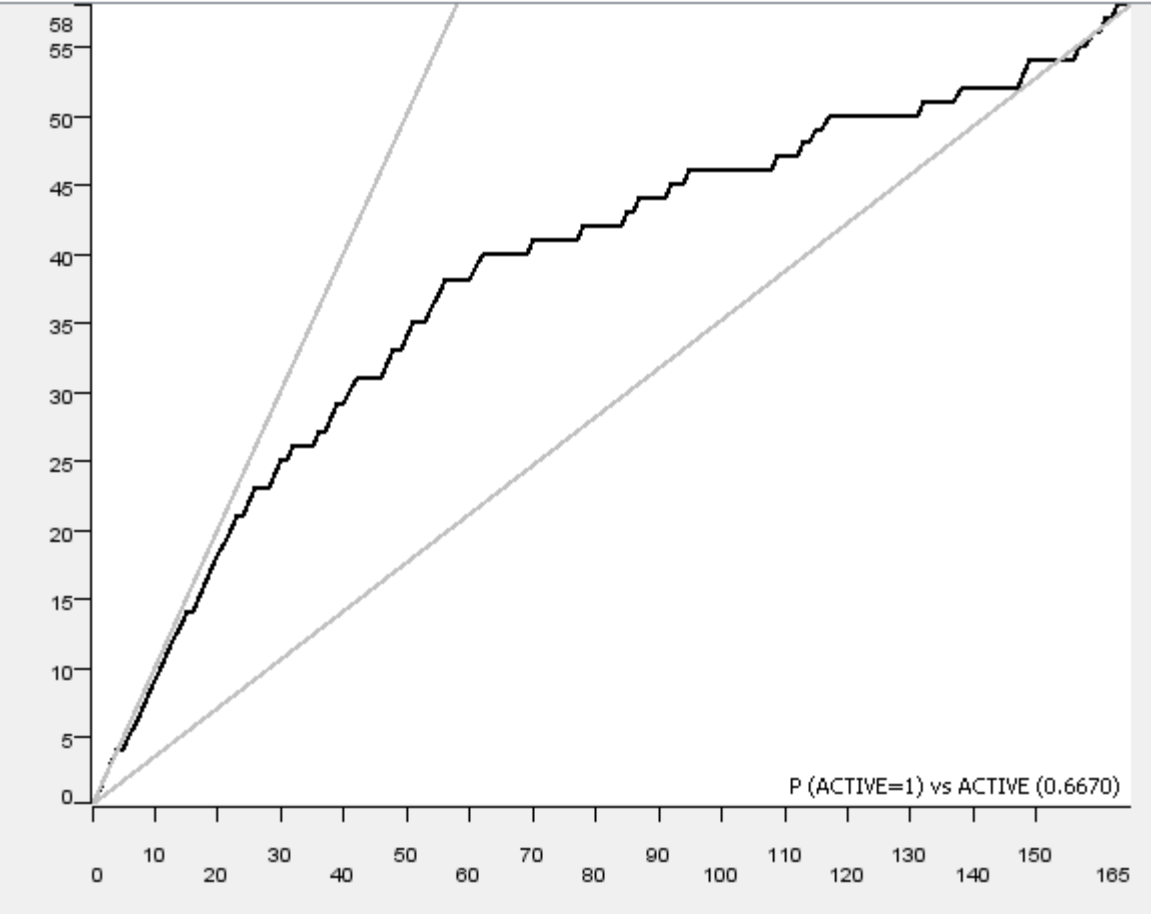

N=165

| Top 10% Mean IC50 | 20.3 nM |
|-------------------|---------|
|-------------------|---------|

|          | Predicted Active | Predicted Inactive |
|----------|------------------|--------------------|
| Active   | 38               | 20                 |
| Inactive | 20               | 87                 |

<50nM DefGood in MEK1, 30% error;  
Random seed = 429

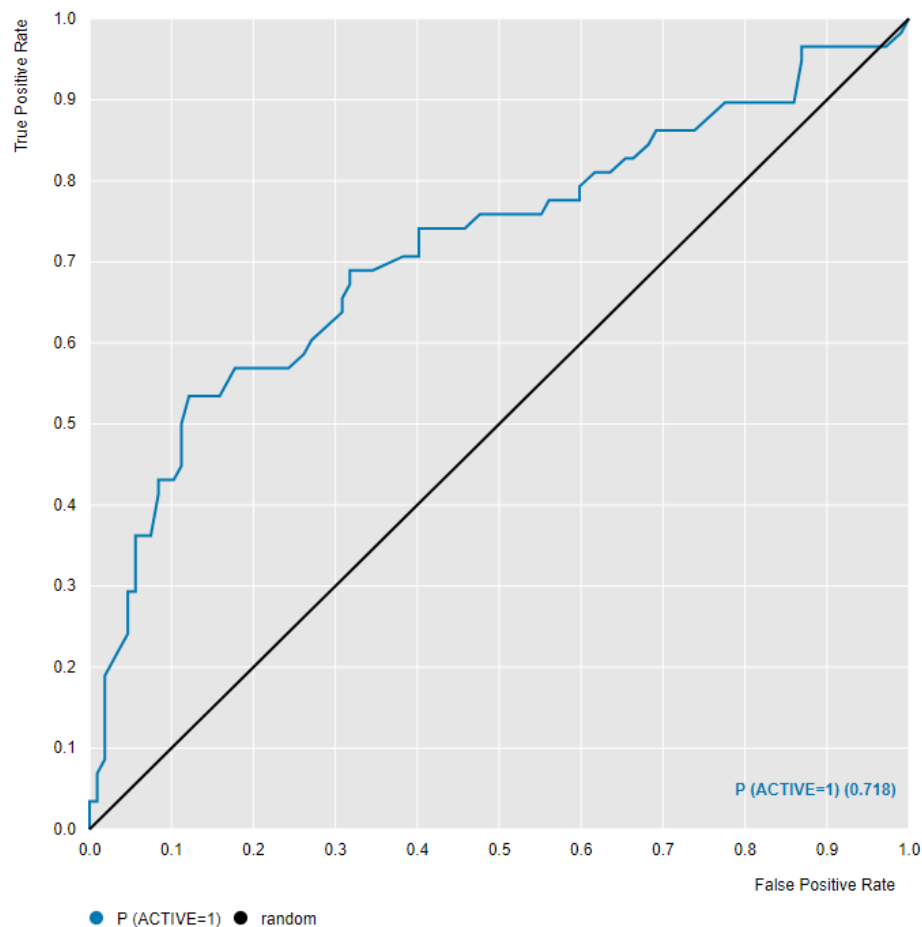

N=165

Top 10% Mean  
IC50

689 nM

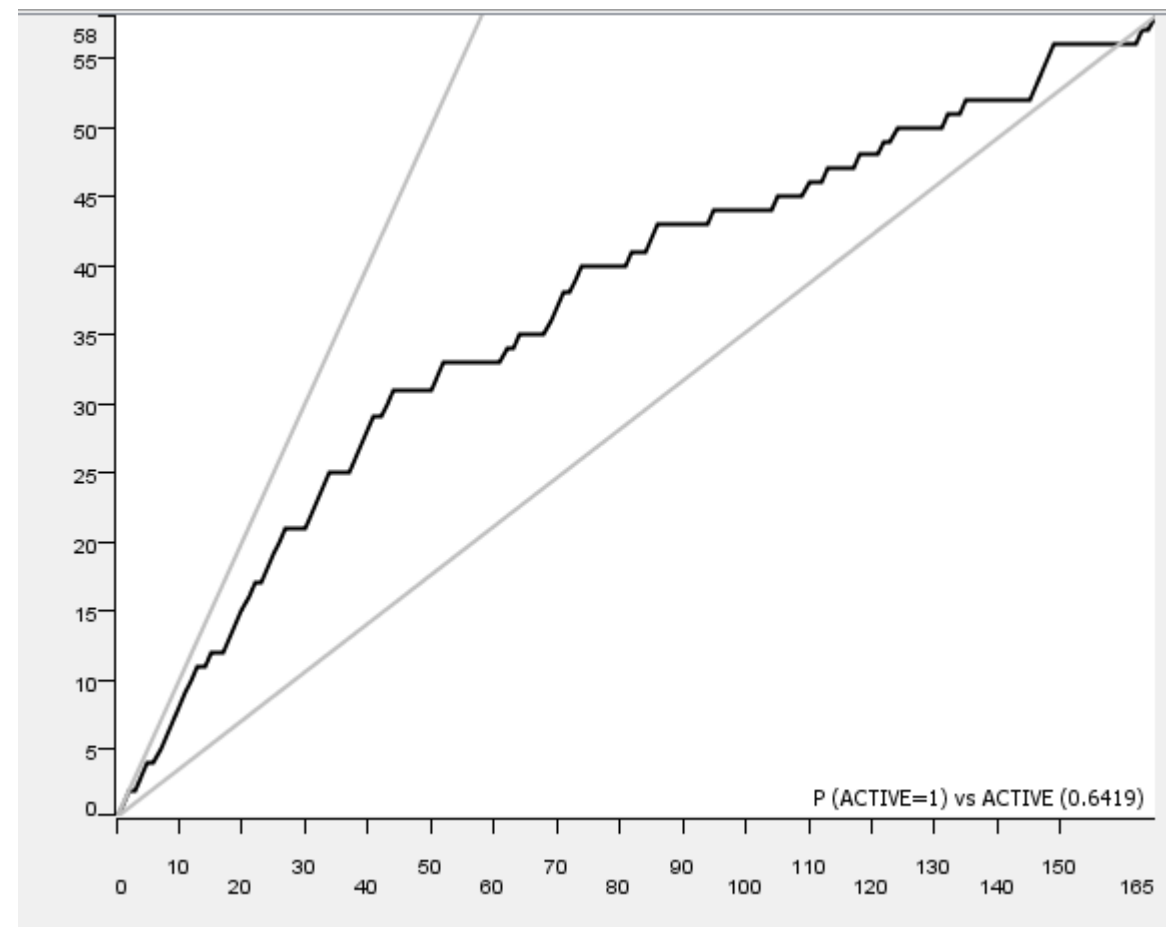

|          | Predicted Active | Predicted Inactive |
|----------|------------------|--------------------|
| Active   | 39               | 19                 |
| Inactive | 34               | 73                 |



<50nM DefGood in MEK1, 35% error;  
Random seed = 429

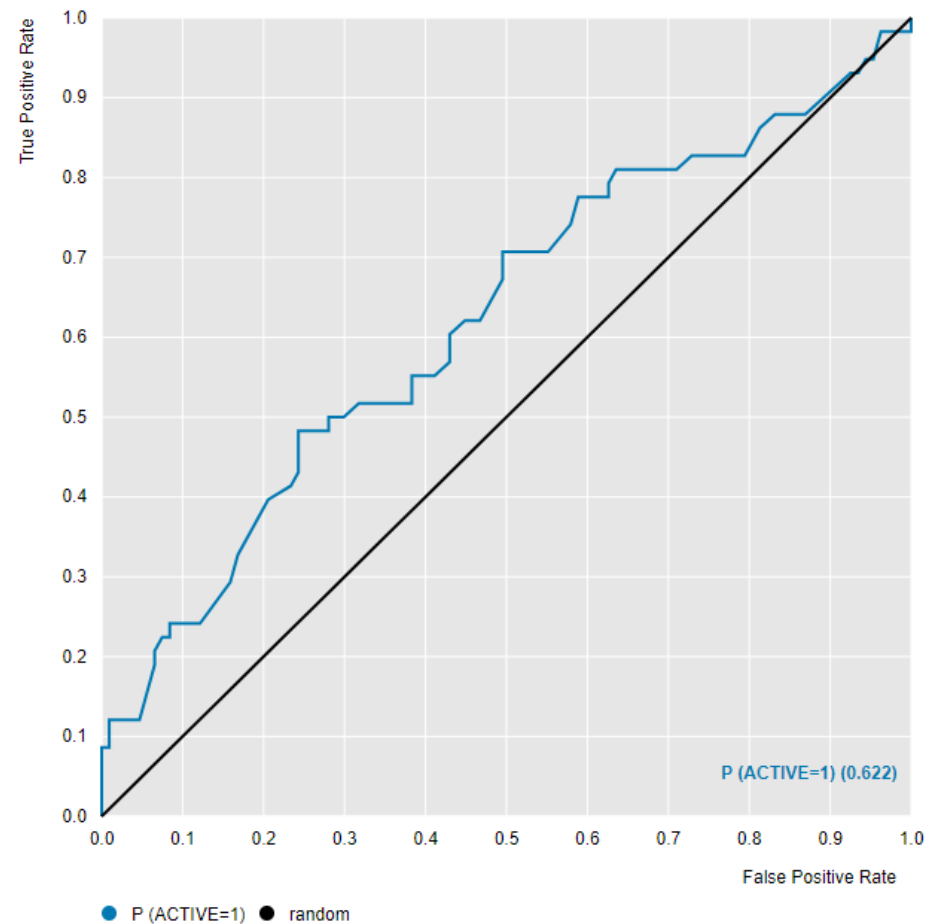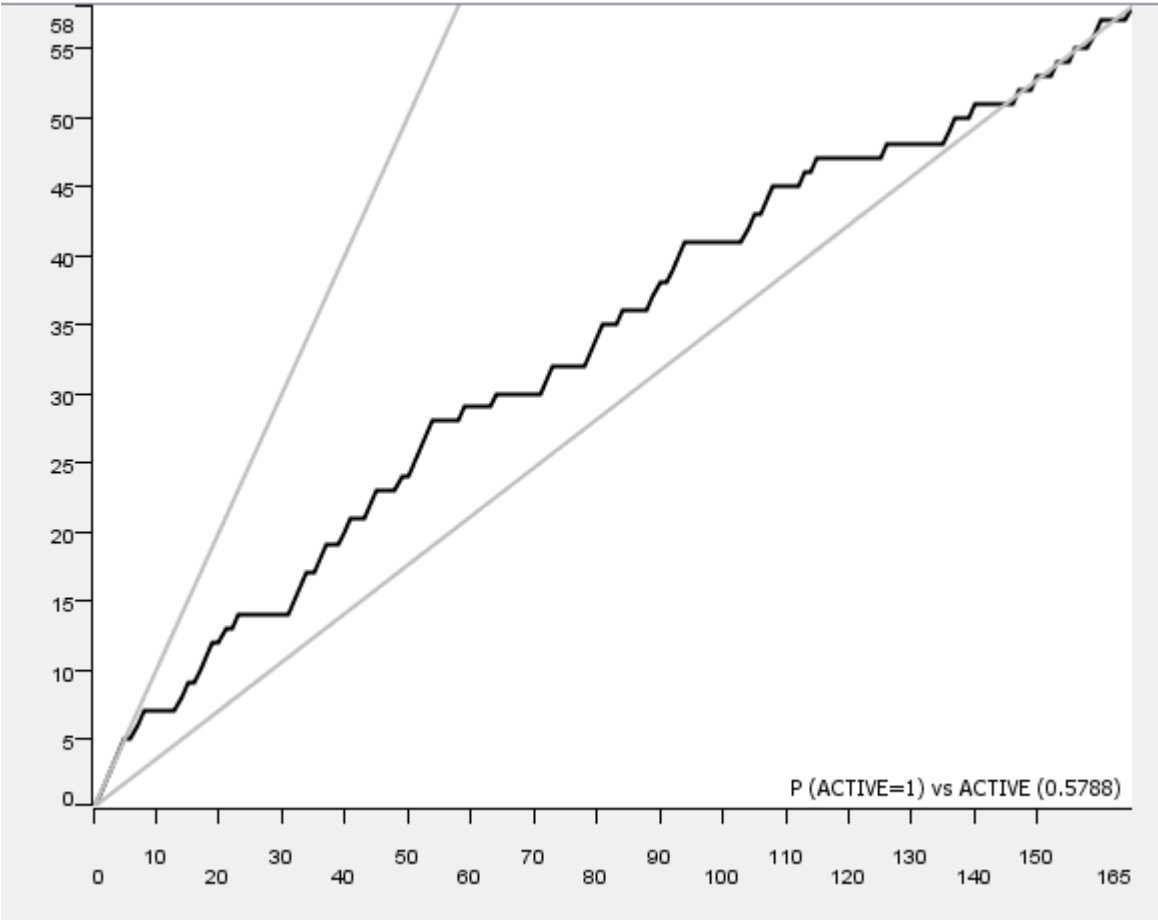

N=165

|                      |        |
|----------------------|--------|
| Top 10% Mean<br>IC50 | 832 nM |
|----------------------|--------|

|          | Predicted Active | Predicted Inactive |
|----------|------------------|--------------------|
| Active   | 32               | 26                 |
| Inactive | 42               | 65                 |

<50nM DefGood in MEK1, 10% error;  
Random seed = 121783

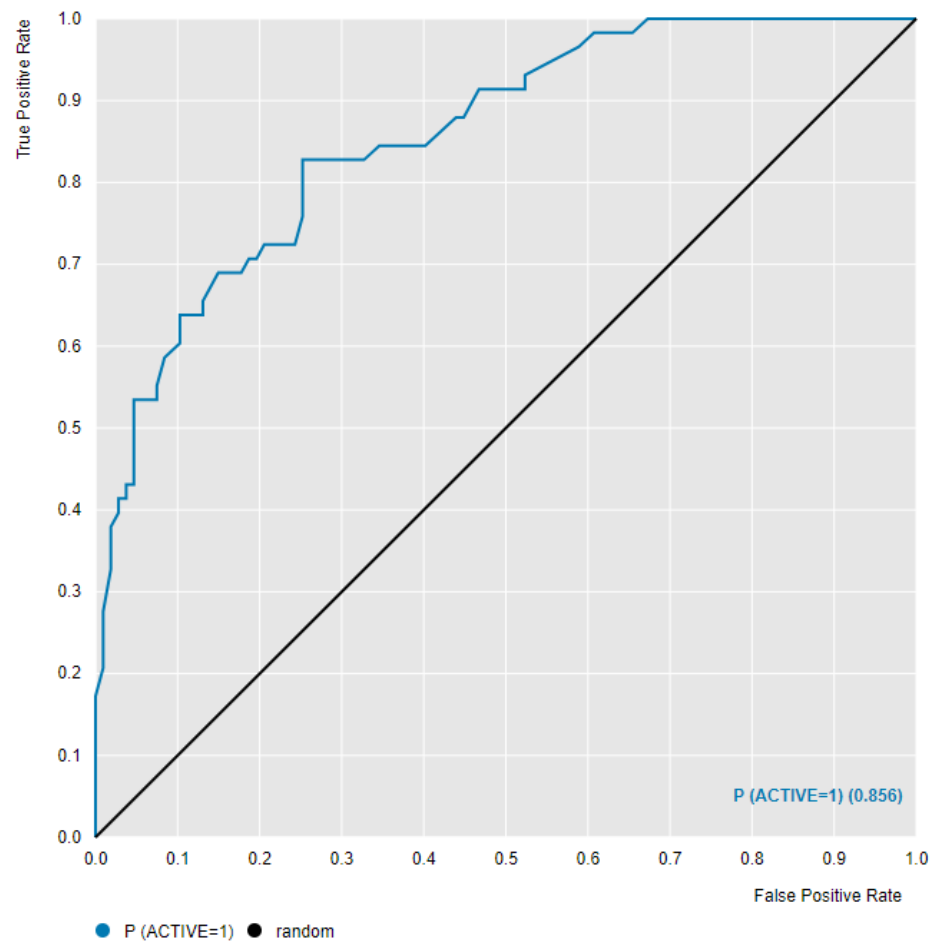

N=165

| Top 10% Mean IC50 | 19.5 nM |
|-------------------|---------|
|-------------------|---------|

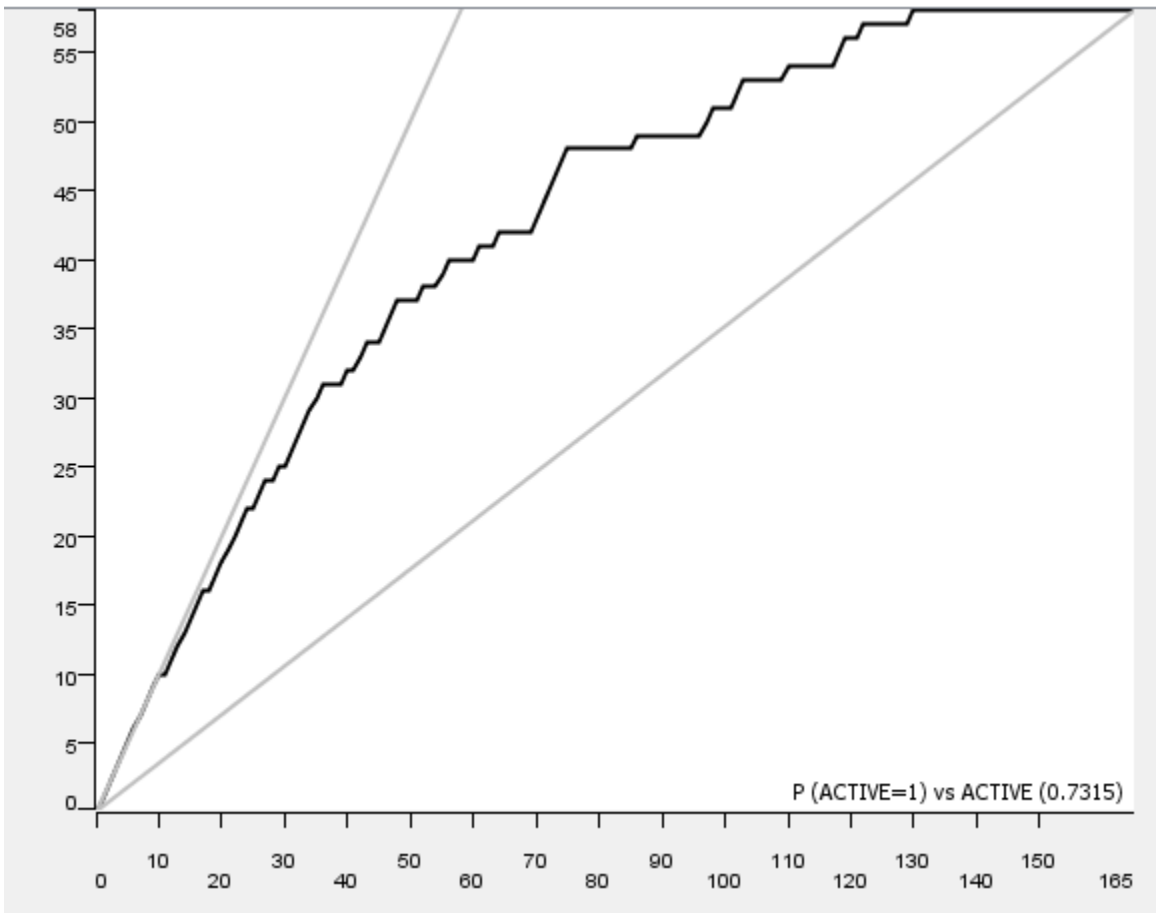

|          | Predicted Active | Predicted Inactive |
|----------|------------------|--------------------|
| Active   | 37               | 21                 |
| Inactive | 14               | 93                 |

<50nM DefGood in MEK1, 20% error;  
Random seed = 121783

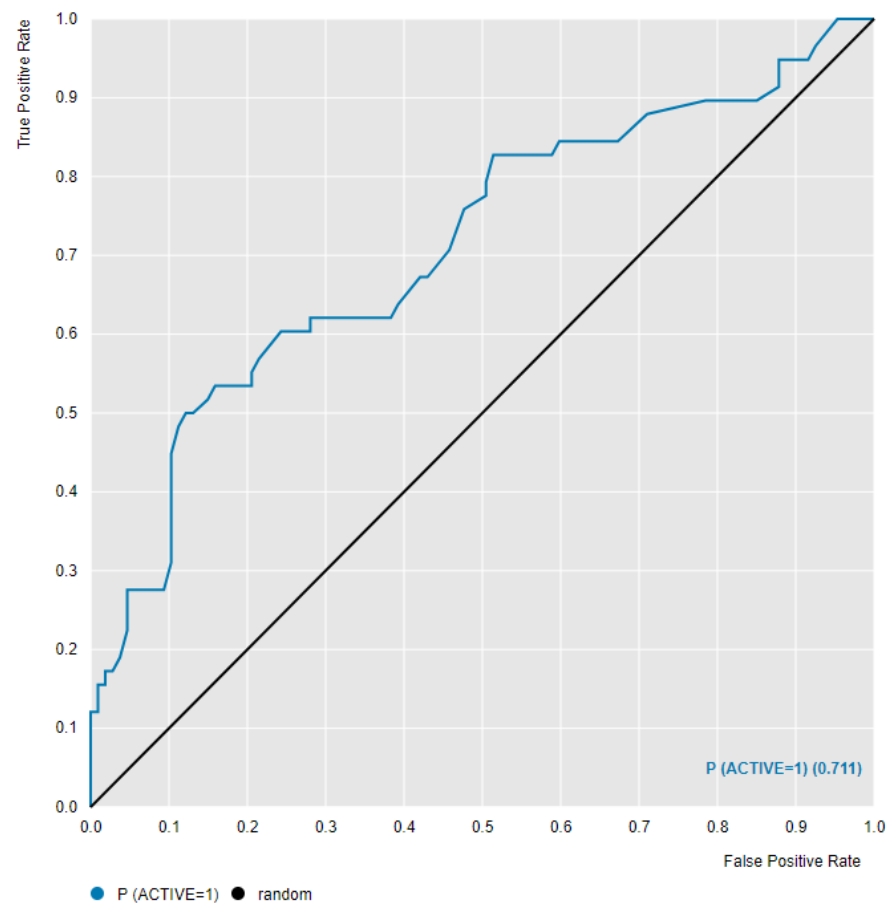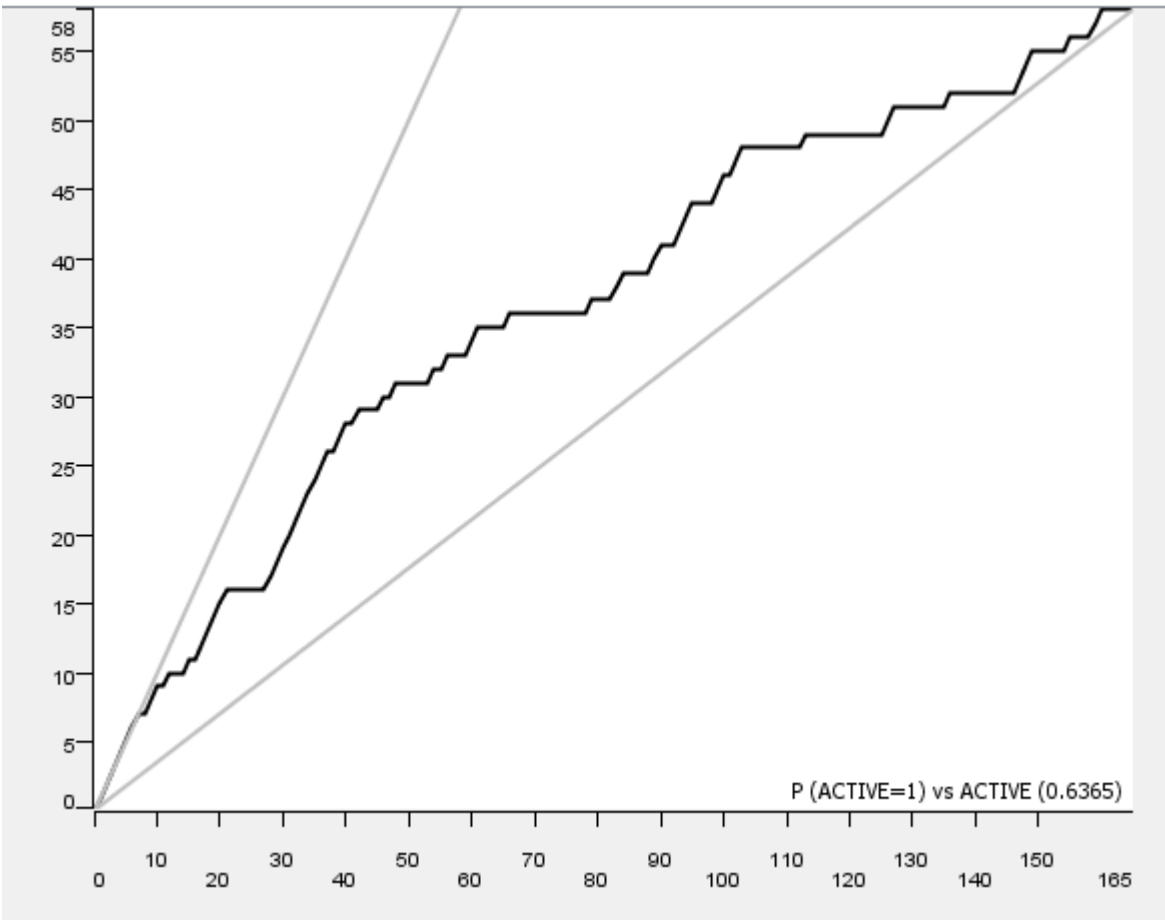

N=165

|                      |         |
|----------------------|---------|
| Top 10% Mean<br>IC50 | 56.3 nM |
|----------------------|---------|

|          | Predicted Active | Predicted Inactive |
|----------|------------------|--------------------|
| Active   | 31               | 27                 |
| Inactive | 20               | 87                 |

<50nM DefGood in MEK1, 25% error;  
Random seed = 121783

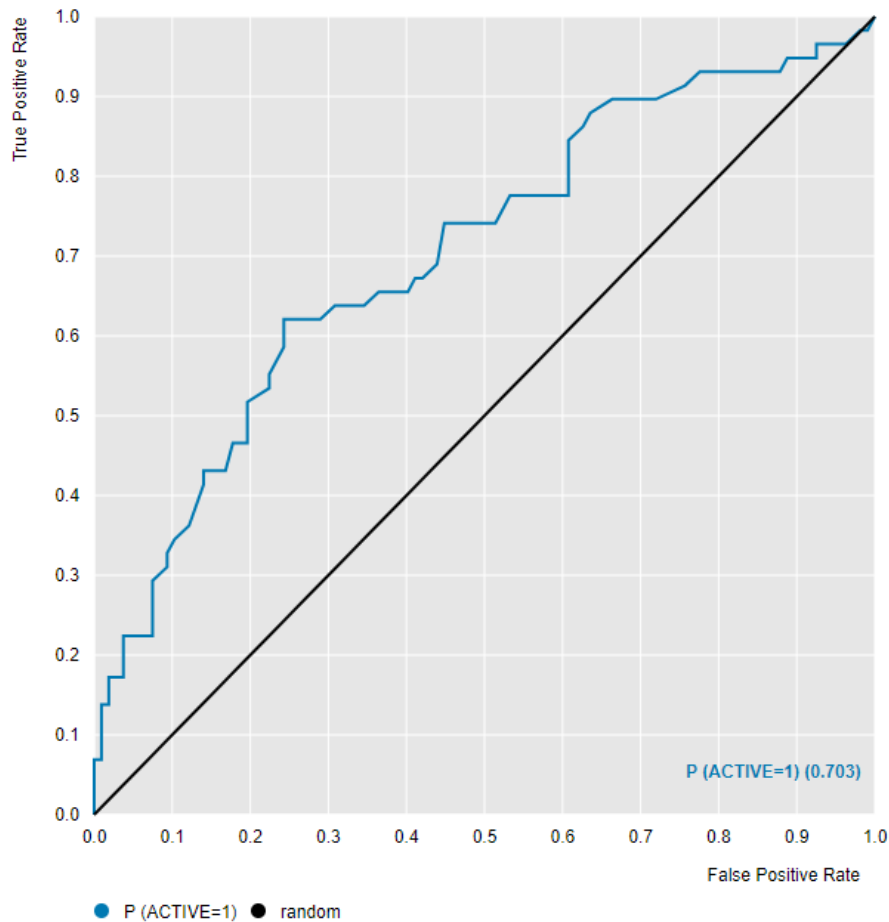

N=165

|                      |          |
|----------------------|----------|
| Top 10% Mean<br>IC50 | 6,900 nM |
|----------------------|----------|

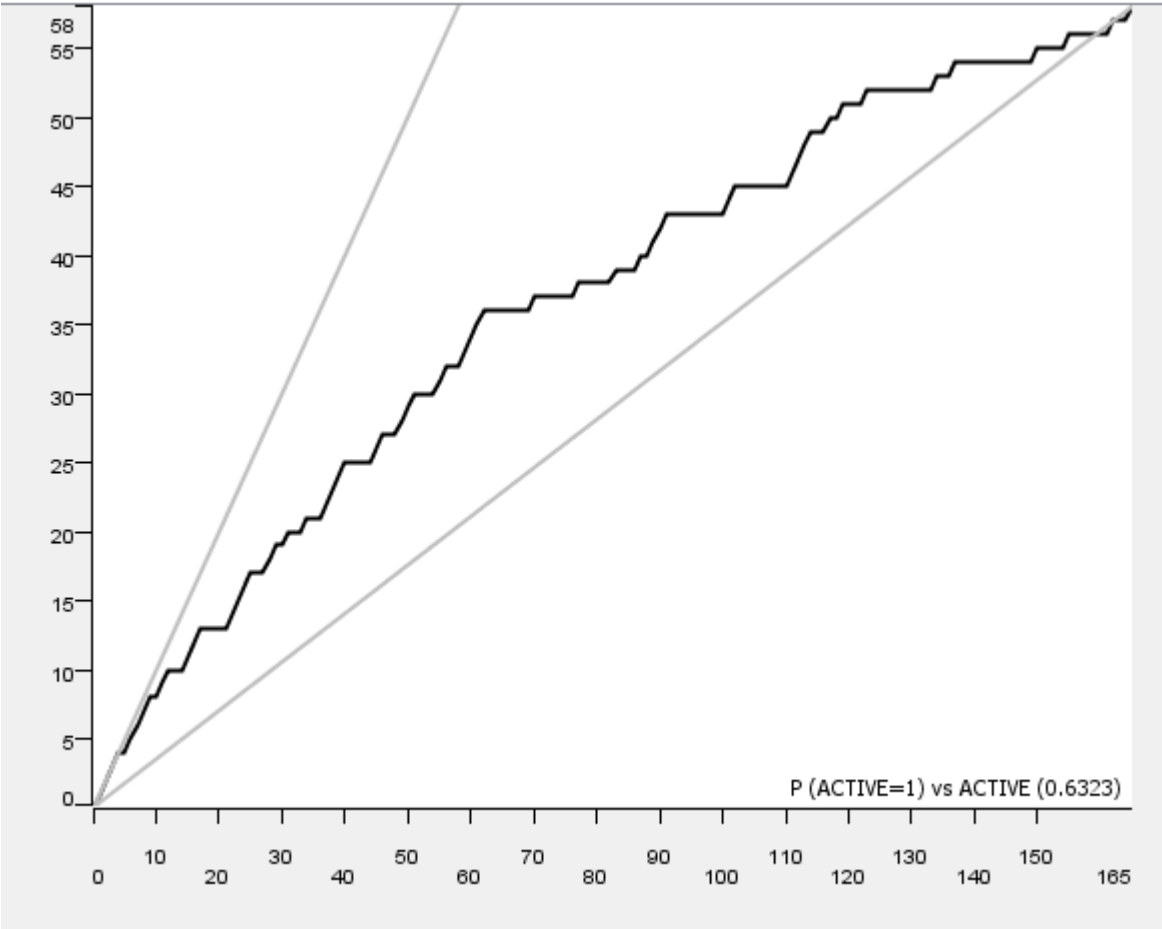

|          | Predicted Active | Predicted Inactive |
|----------|------------------|--------------------|
| Active   | 34               | 24                 |
| Inactive | 26               | 81                 |

# Conclusion - RF

- A Random Forrest could be generated for MEK1 kinase with a decision value of  $<50$  nM as defined as active. The predictivity of the algorithm could be preserved in three random train/test cycles as error was introduced in the training set. The point of failure was 30%, 35% and 25% error.

PNN- <50nM DefGood in MEK1, 5% error ;  
Random seed = 1515533876005

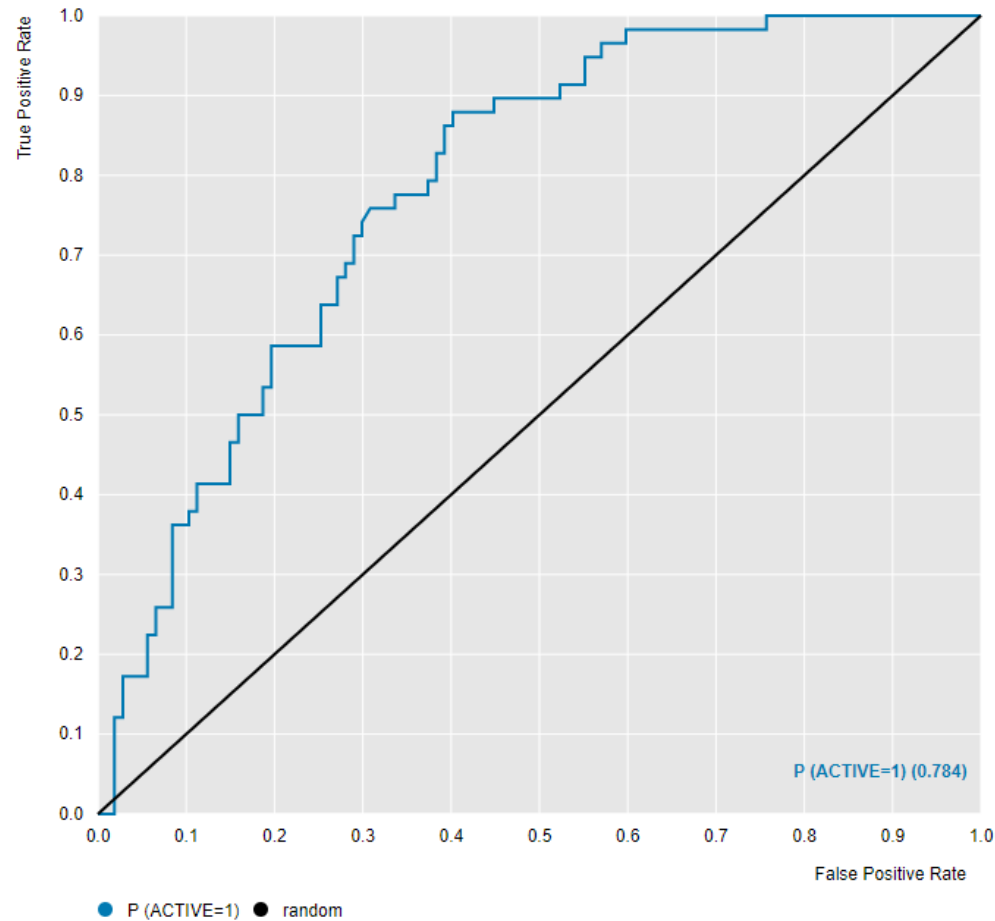

N=165

Top 10% Mean IC50

778 nM  
Several Micromolar  
mistakes

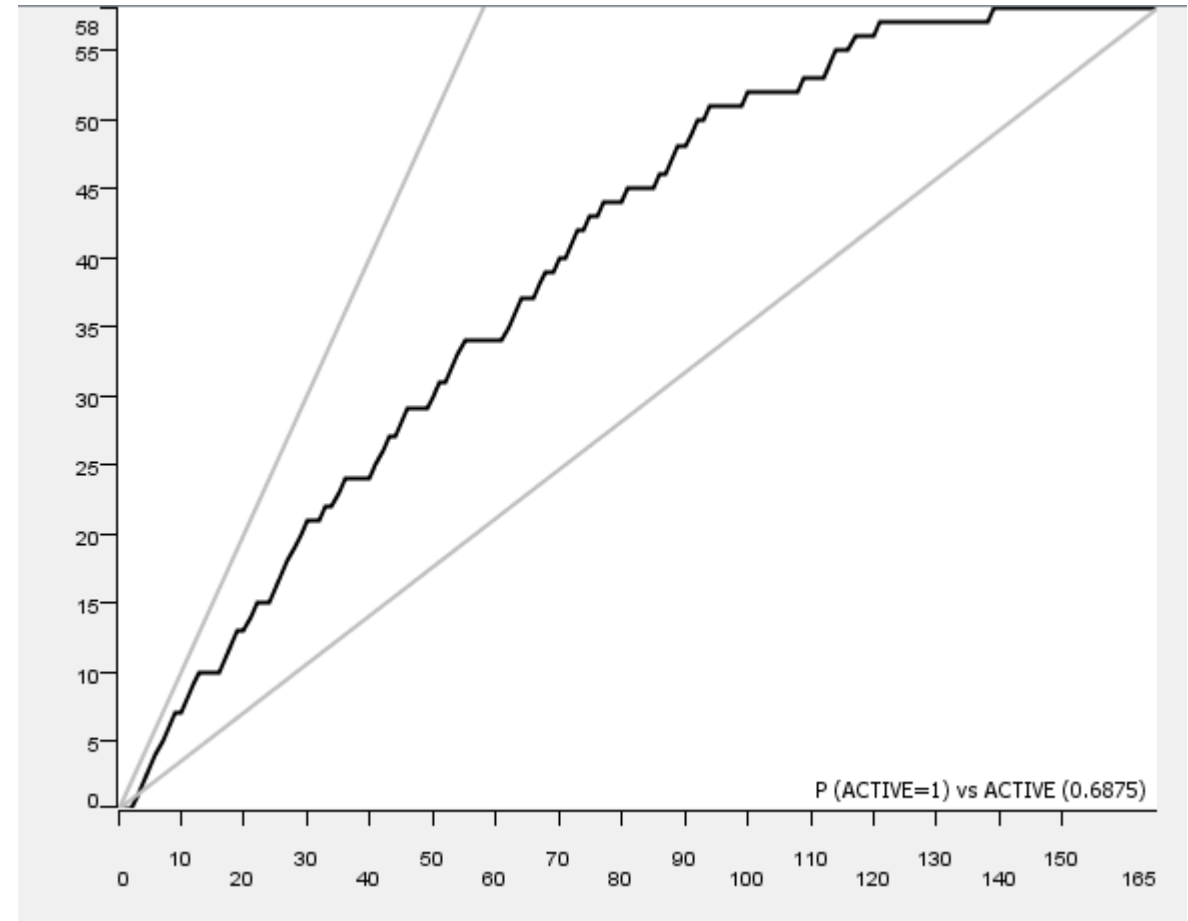

|          | Predicted Active | Predicted Inactive |
|----------|------------------|--------------------|
| Active   | 34               | 24                 |
| Inactive | 22               | 85                 |

# PNN- <50nM DefGood in MEK1, 5% error ; Random seed = 429

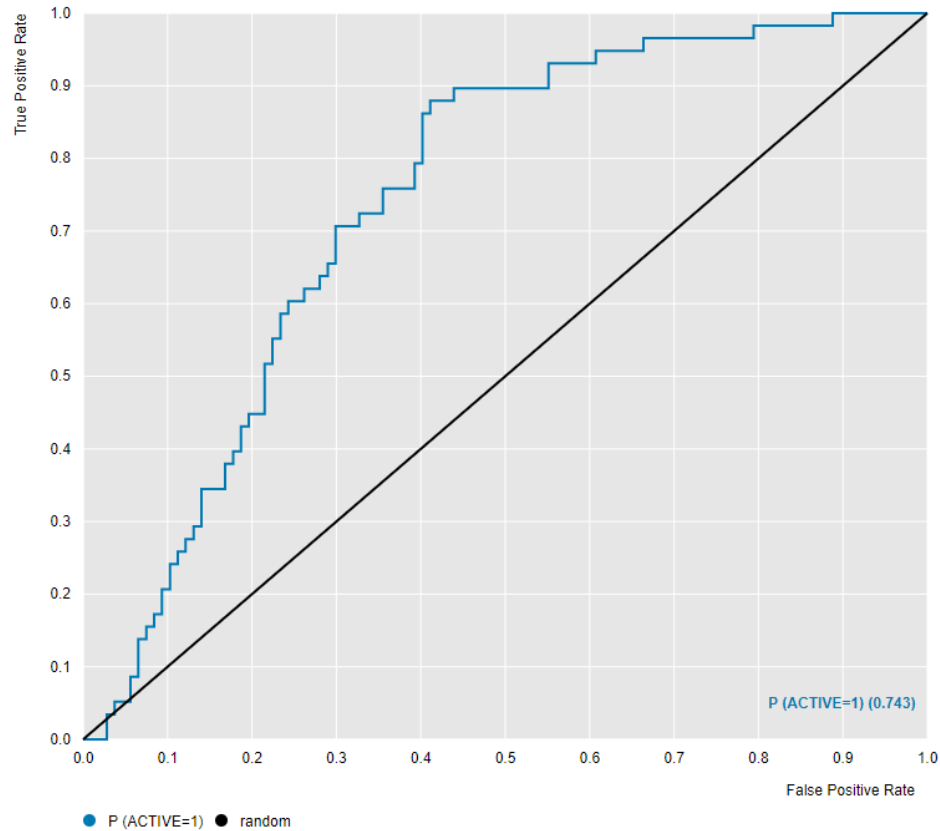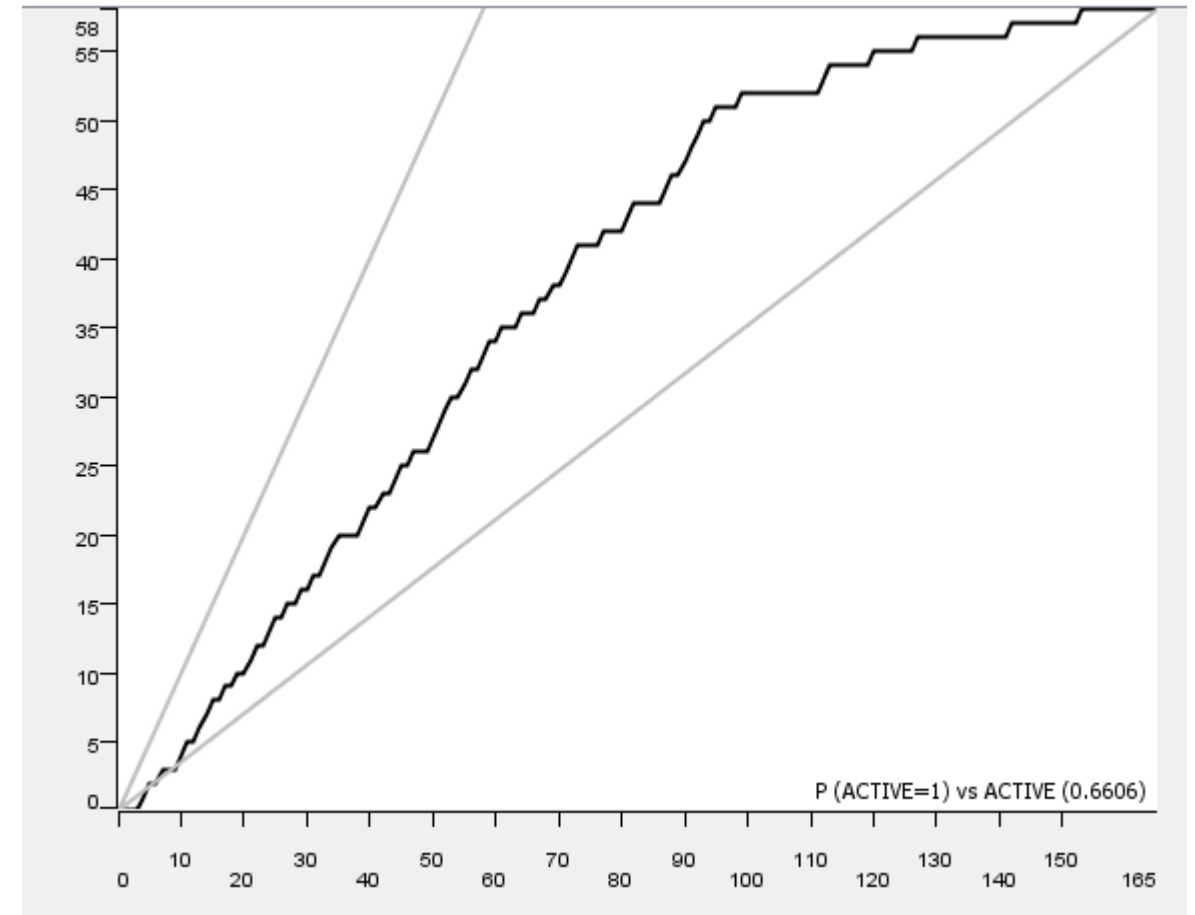

N=165

Top 10% Mean IC50

1,700 nM

|          | Predicted Active | Predicted Inactive |
|----------|------------------|--------------------|
| Active   | 29               | 29                 |
| Inactive | 23               | 84                 |

PNN - <50nM DefGood in MEK1, 5% error; Random seed = 429 (reparameterized  
Theta minus = 0.15; theta plus = 0.85)

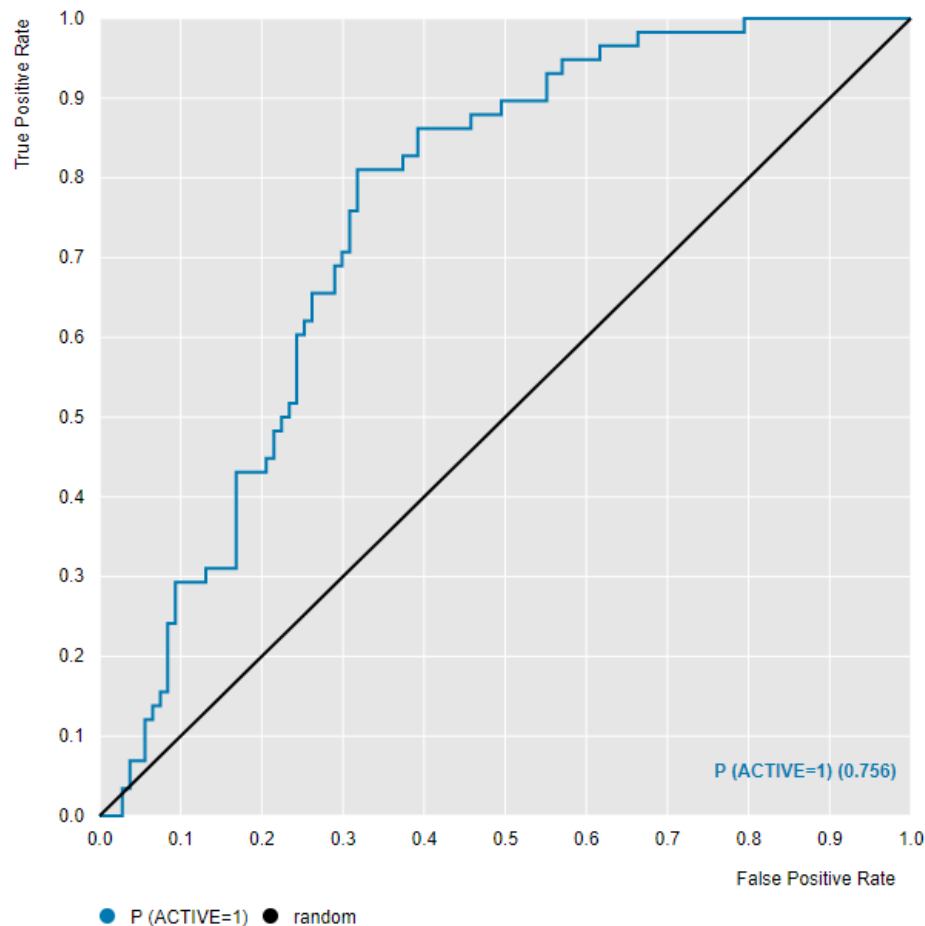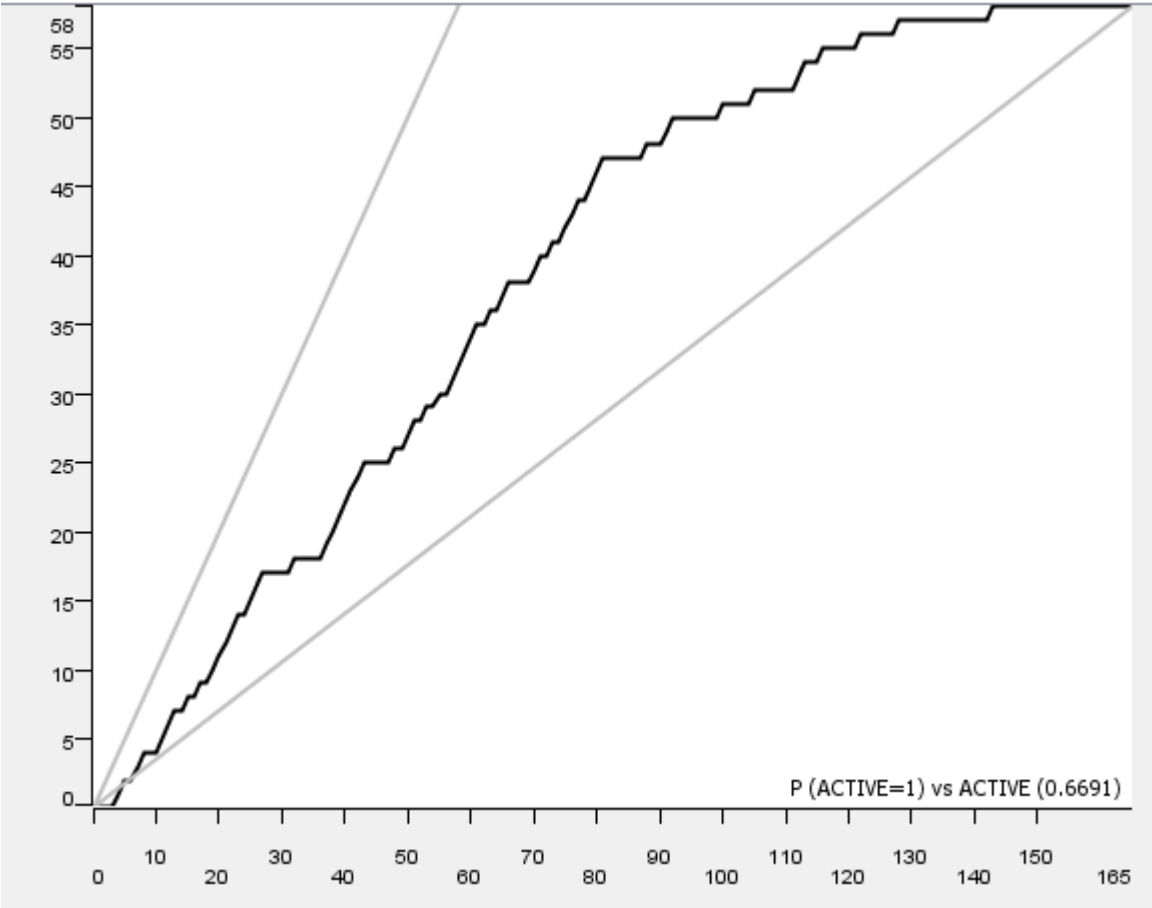

N=165

|                      |          |
|----------------------|----------|
| Top 10% Mean<br>IC50 | 1,700 nM |
|----------------------|----------|

|          | Predicted Active | Predicted Inactive |
|----------|------------------|--------------------|
| Active   | 26               | 32                 |
| Inactive | 22               | 85                 |



PNN - <50nM DefGood in MEK1, 5% error;  
Random seed = 121783

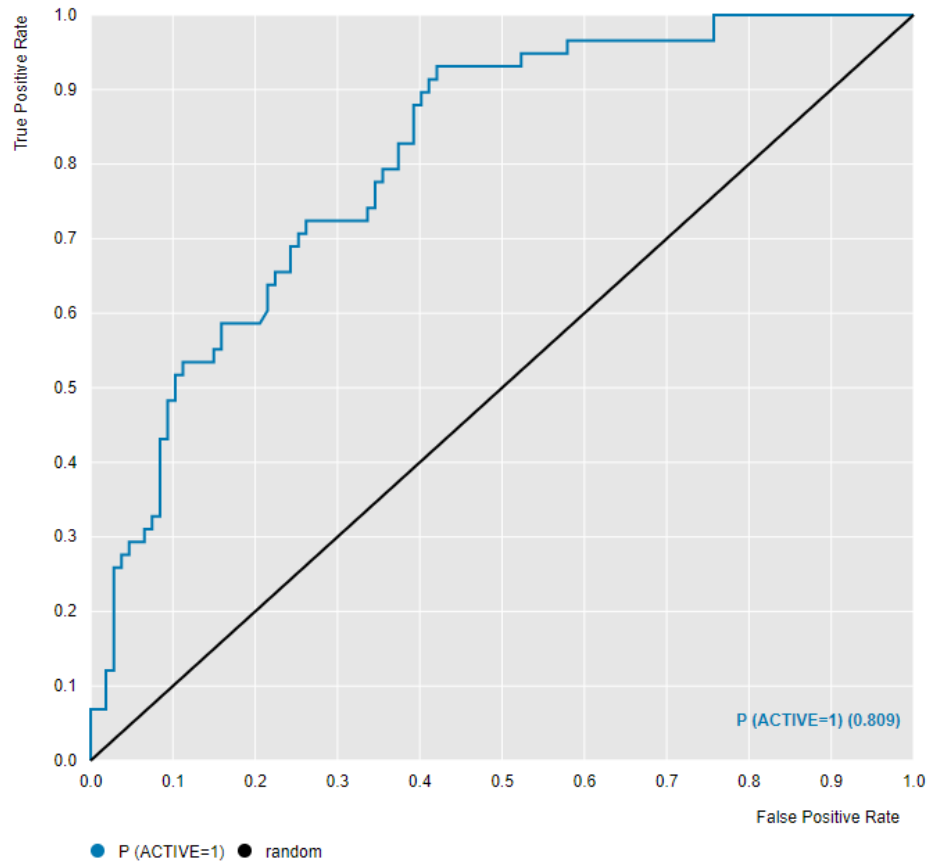

N=165

Top 10% Mean  
IC50

72.1 nM

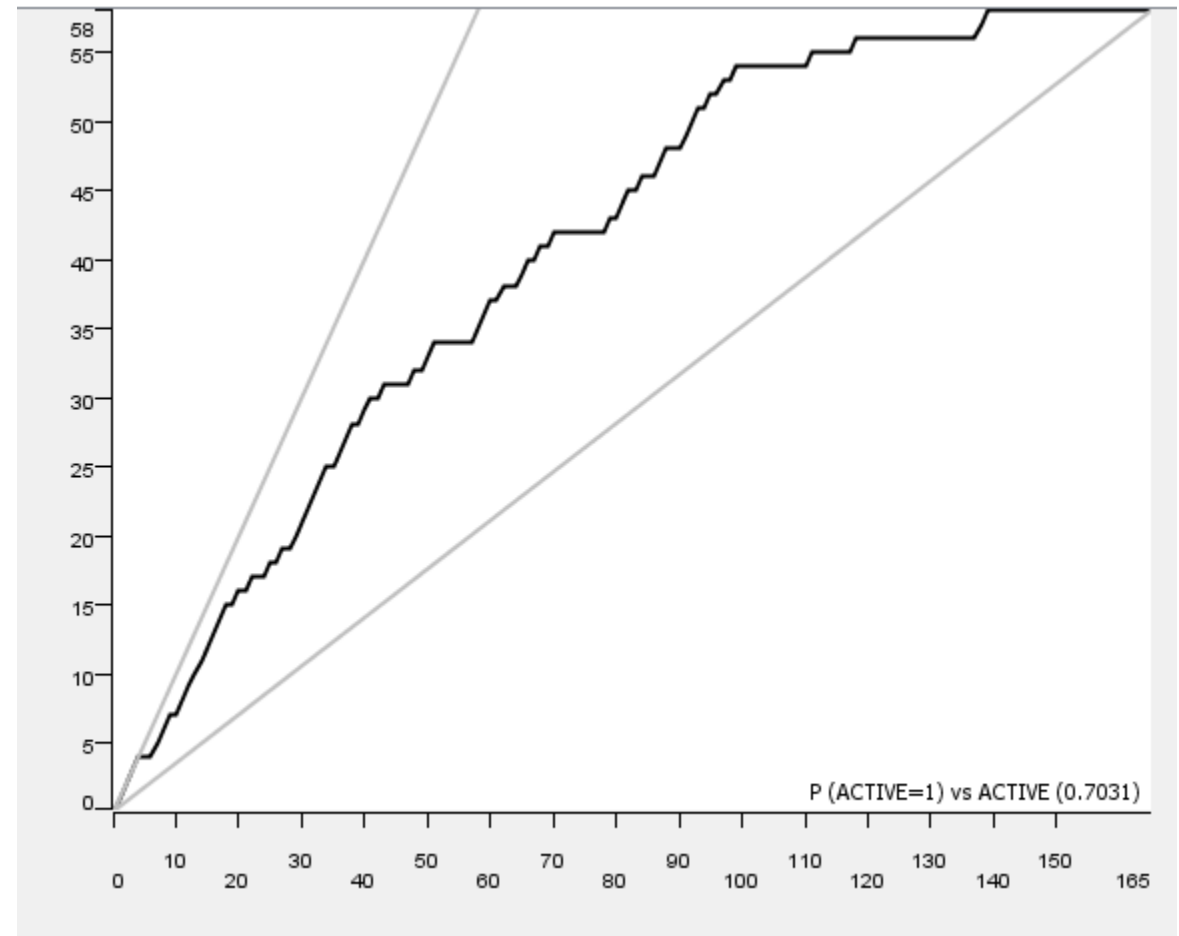

|          | Predicted Active | Predicted Inactive |
|----------|------------------|--------------------|
| Active   | 29               | 29                 |
| Inactive | 11               | 96                 |

PNN - <50nM DefGood in MEK1, 10% error;  
Random seed = 121783

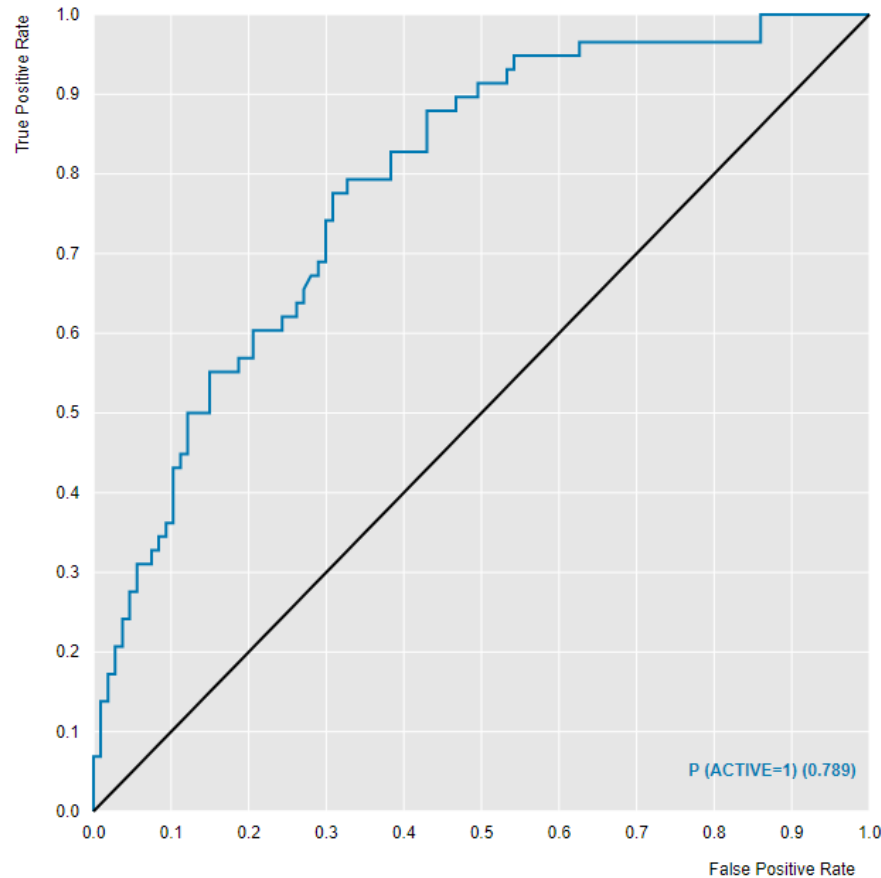

N=165

● P (ACTIVE=1) ● random

Top 10% Mean  
IC50

91.8 nM

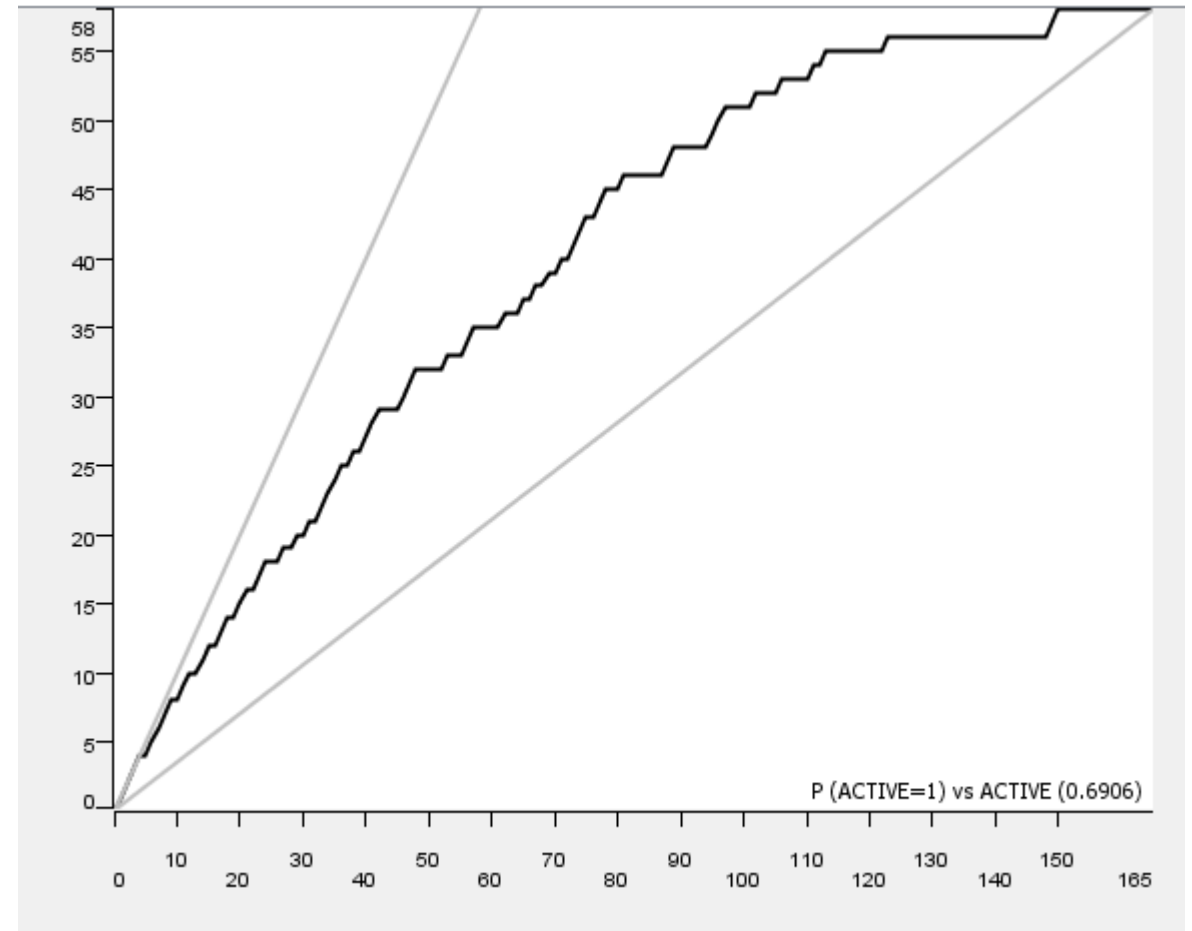

|          | Predicted Active | Predicted Inactive |
|----------|------------------|--------------------|
| Active   | 26               | 32                 |
| Inactive | 13               | 94                 |

PNN - <50nM DefGood in MEK1, 15% error;  
Random seed = 121783

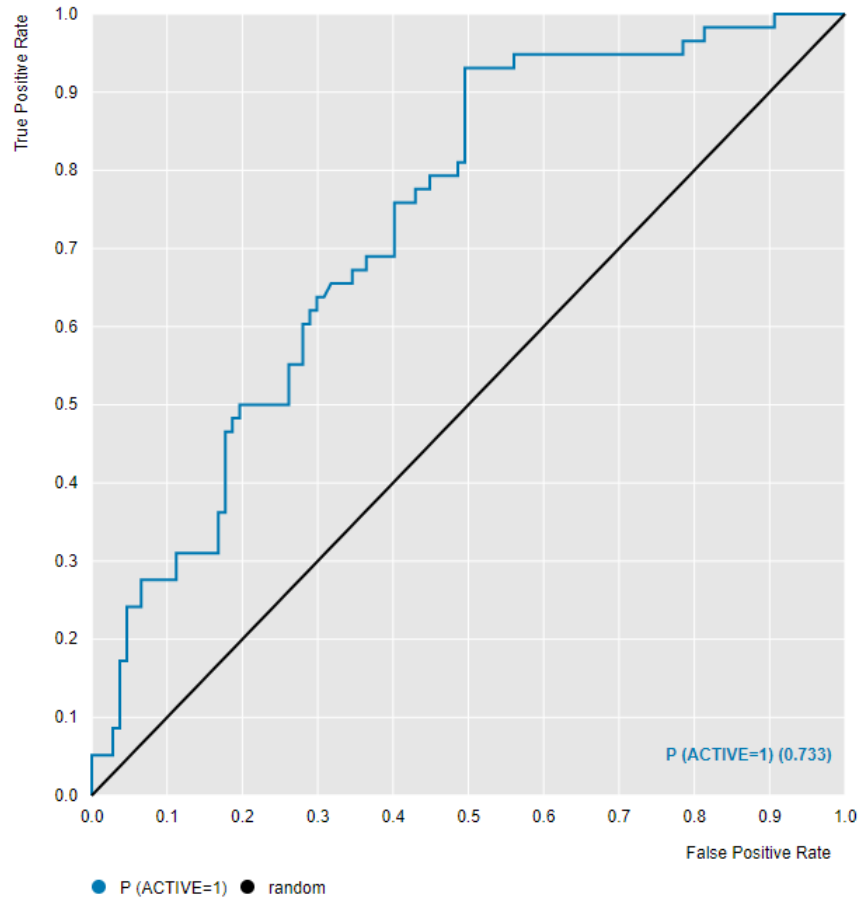

N=165

Top 10% Mean  
IC50

102 nM

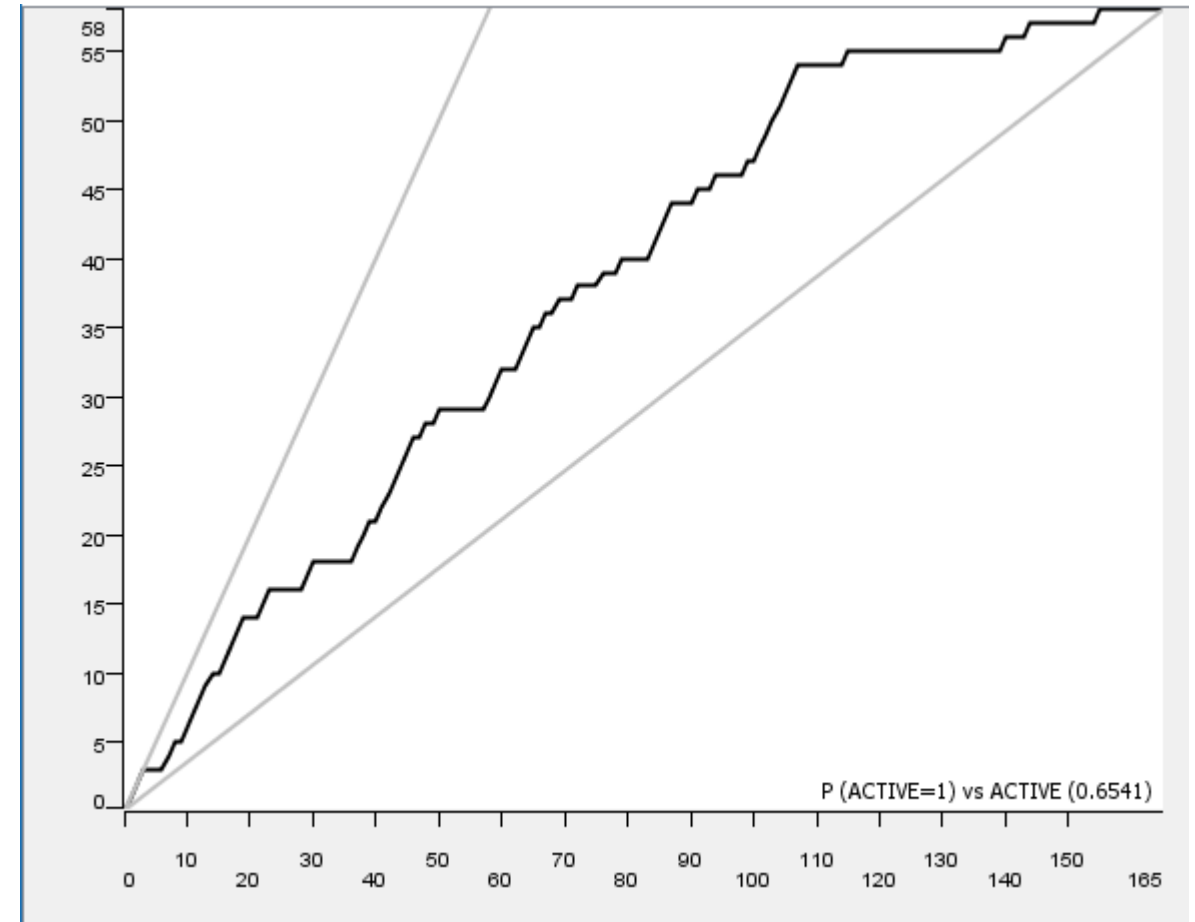

|          | Predicted Active | Predicted Inactive |
|----------|------------------|--------------------|
| Active   | 29               | 29                 |
| Inactive | 28               | 79                 |

# PNN - <50nM DefGood in MEK1, 20% error; Random seed = 121783

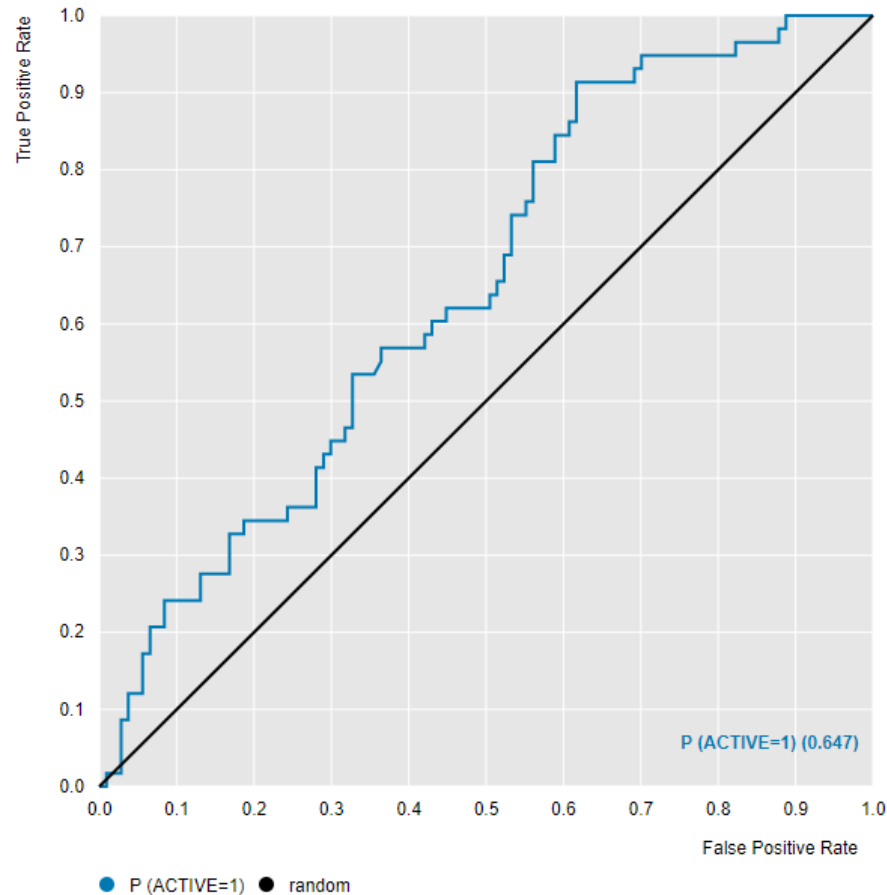

N=165

Top 10% Mean  
IC50

12,600 nM

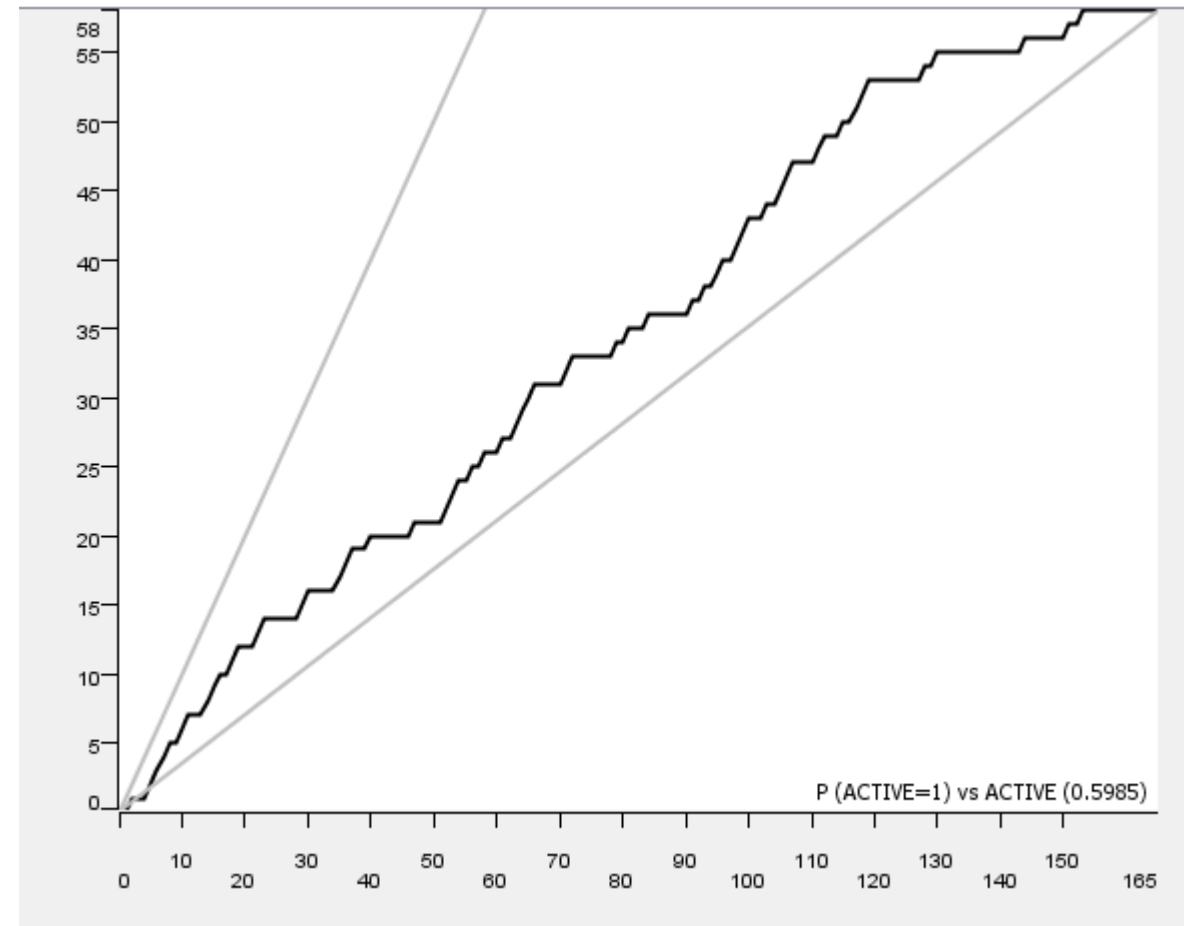

|          | Predicted Active | Predicted Inactive |
|----------|------------------|--------------------|
| Active   | 22               | 36                 |
| Inactive | 30               | 77                 |

PNN - <50nM DefGood in MEK1, 20% error; Random seed = 121783  
(reparameterized Theta minus = 0.35; theta plus = 0.35)

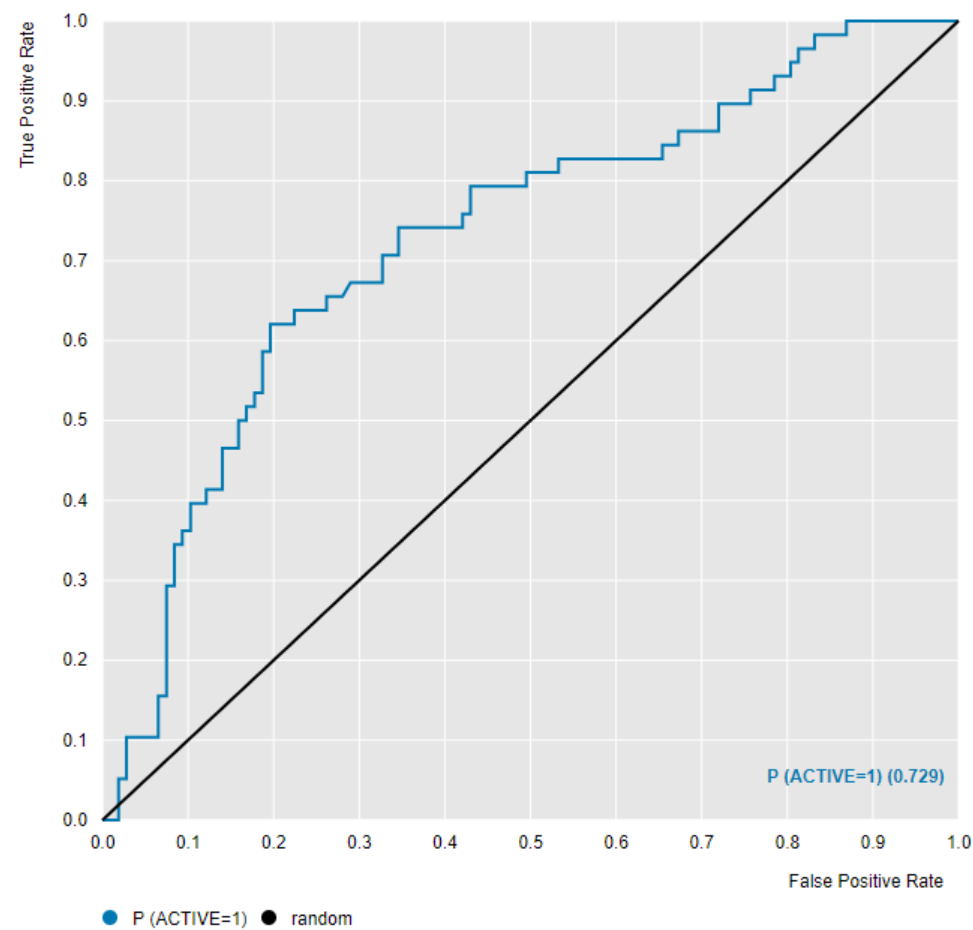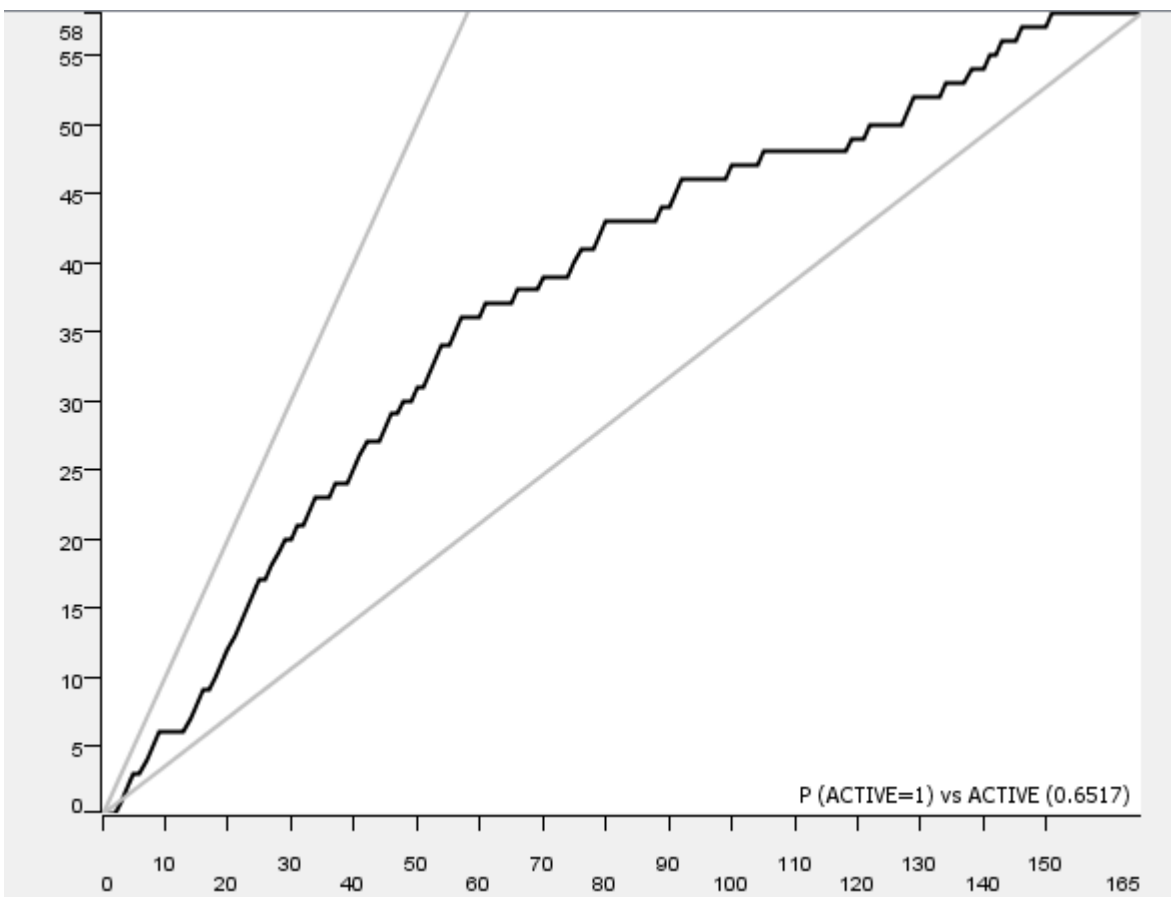

N=165

|                      |        |
|----------------------|--------|
| Top 10% Mean<br>IC50 | 115 nM |
|----------------------|--------|

|          | Predicted Active | Predicted Inactive |
|----------|------------------|--------------------|
| Active   | 17               | 41                 |
| Inactive | 9                | 98                 |

PNN - <50nM DefGood in MEK1, 25% error; Random seed = 121783  
(reparameterized Theta minus = 0.35; theta plus = 0.35)

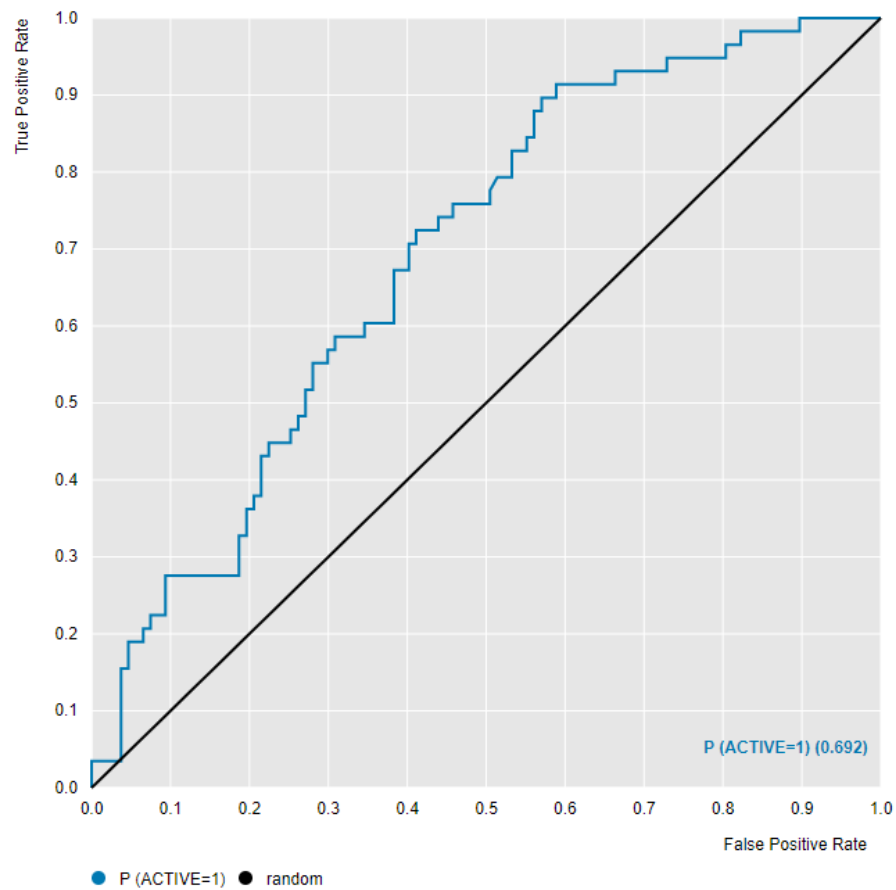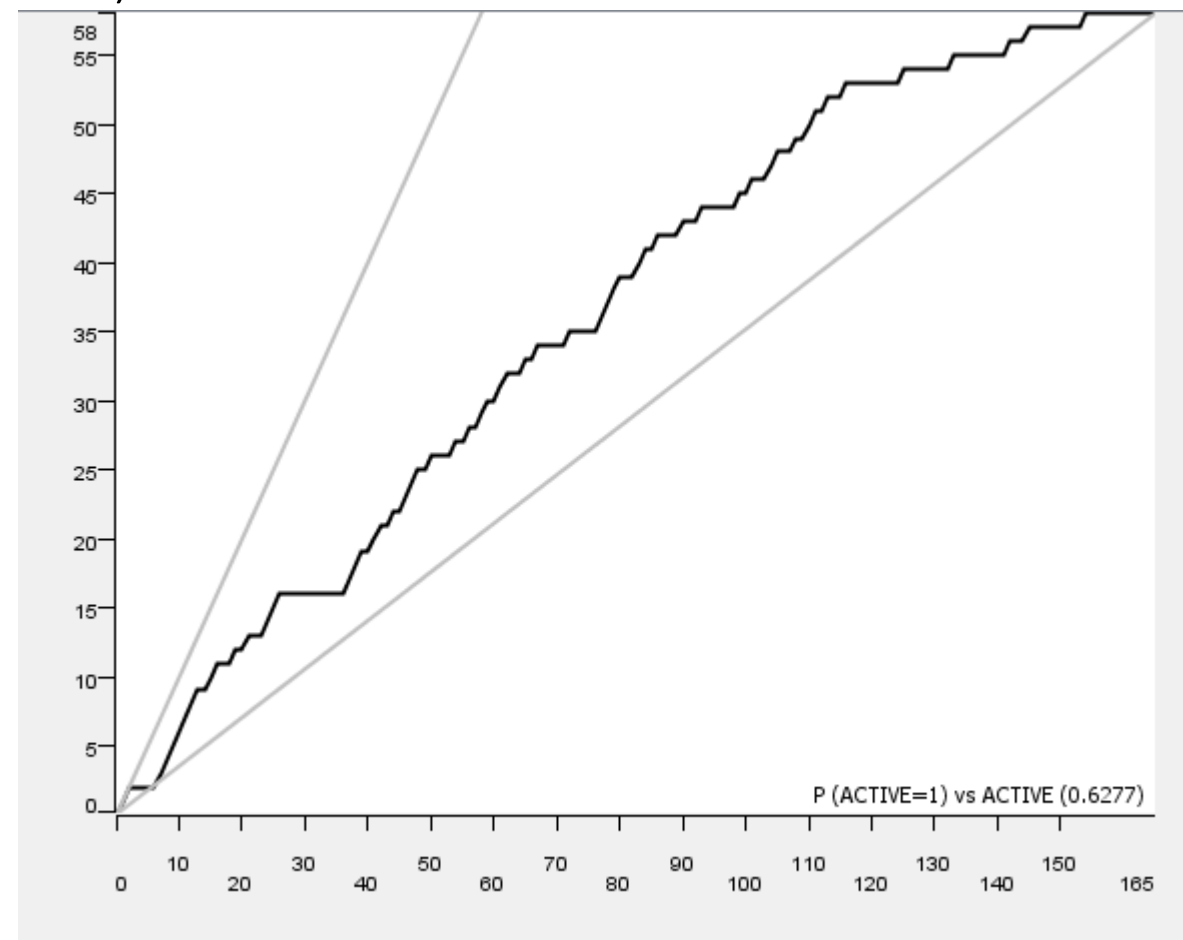

N=165

|                      |         |
|----------------------|---------|
| Top 10% Mean<br>IC50 | 79.0 nM |
|----------------------|---------|

|          | Predicted Active | Predicted Inactive |
|----------|------------------|--------------------|
| Active   | 24               | 34                 |
| Inactive | 23               | 84                 |

# Conclusion - PNN

- Across three random seeds, the % error that lead to a significant enrichment failure and/or top 10% IC50 increase in the retrospective test was 5%, 5% and 25% for each unique random seed.
- Parameterization did not alter one of the failure points, and moved the point of failure from 20% to 25% in the last random split.

PARP1



# PARP1 NBN Design

- Rules -  $\$RELATION\$ = "="$  OR  $\$IC50\$ > 999$  OR  $\$IC50\$ < 10 \Rightarrow TRUE$
- Sort ascending and remove duplicates
- DefGood scanned between 5 and 25 nM
- 80-20 split for both actives and inactives
- NBN – ECFP4 used Classifier where Prediction was Active = True
- Resulted in 1933 compounds after cleaning the data

# <5 nM DefGood in PARP1

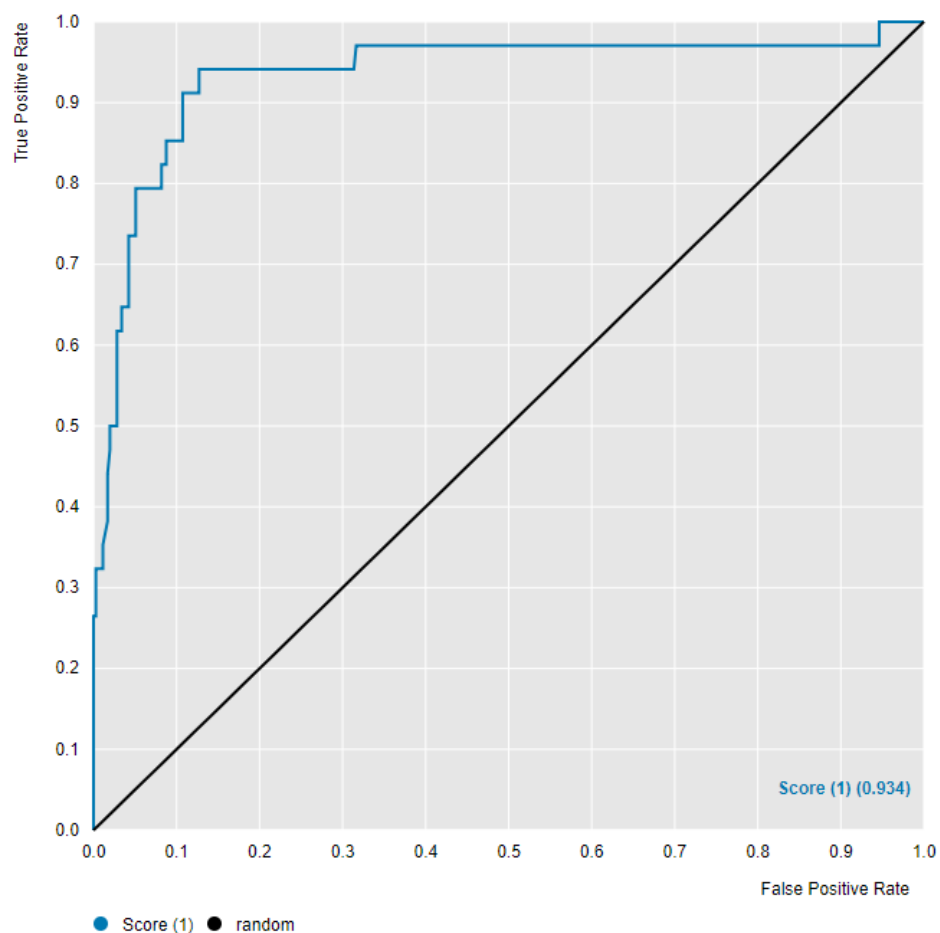

N=388

| Top 10% Mean IC50 | 106 nM |
|-------------------|--------|
|-------------------|--------|

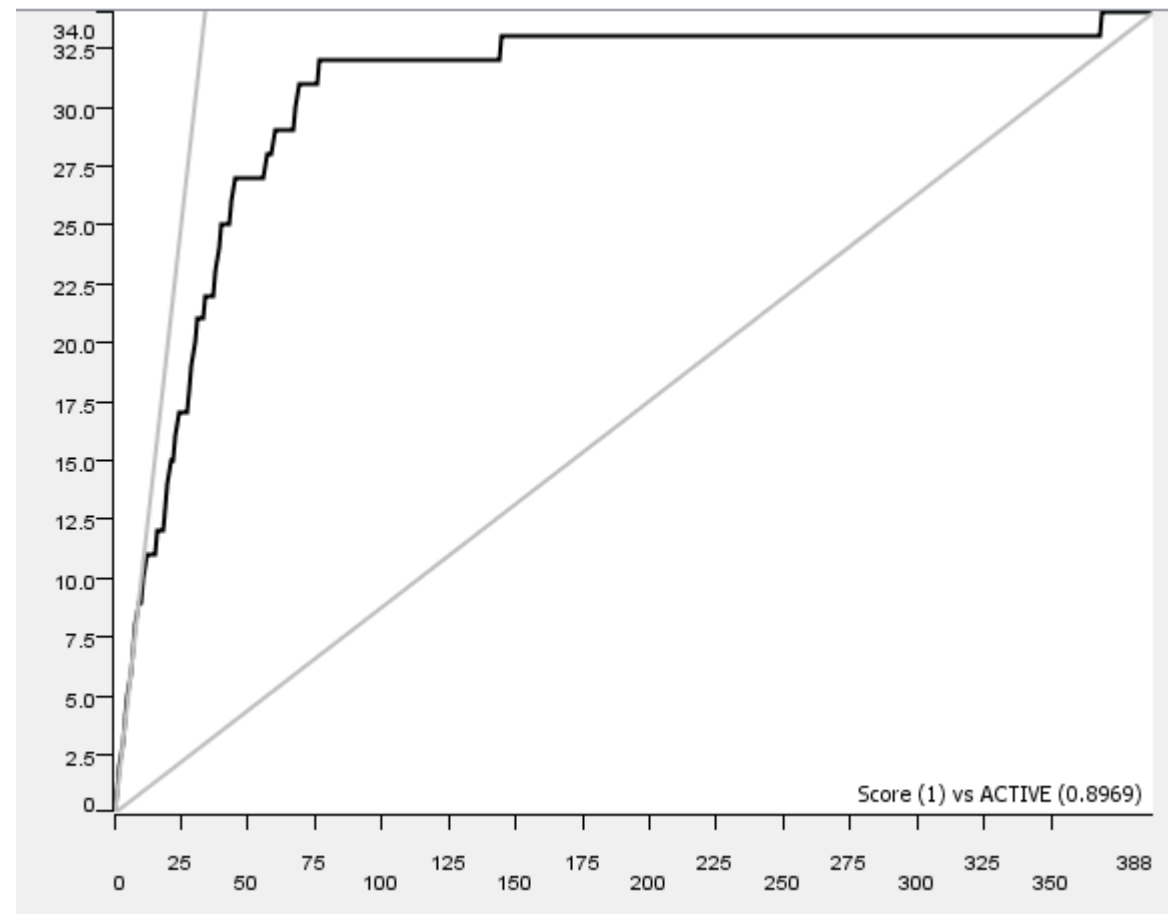

|          | Predicted Active | Predicted Inactive |
|----------|------------------|--------------------|
| Active   | 31               | 3                  |
| Inactive | 42               | 312                |

# <10 nM DefGood in PARP1

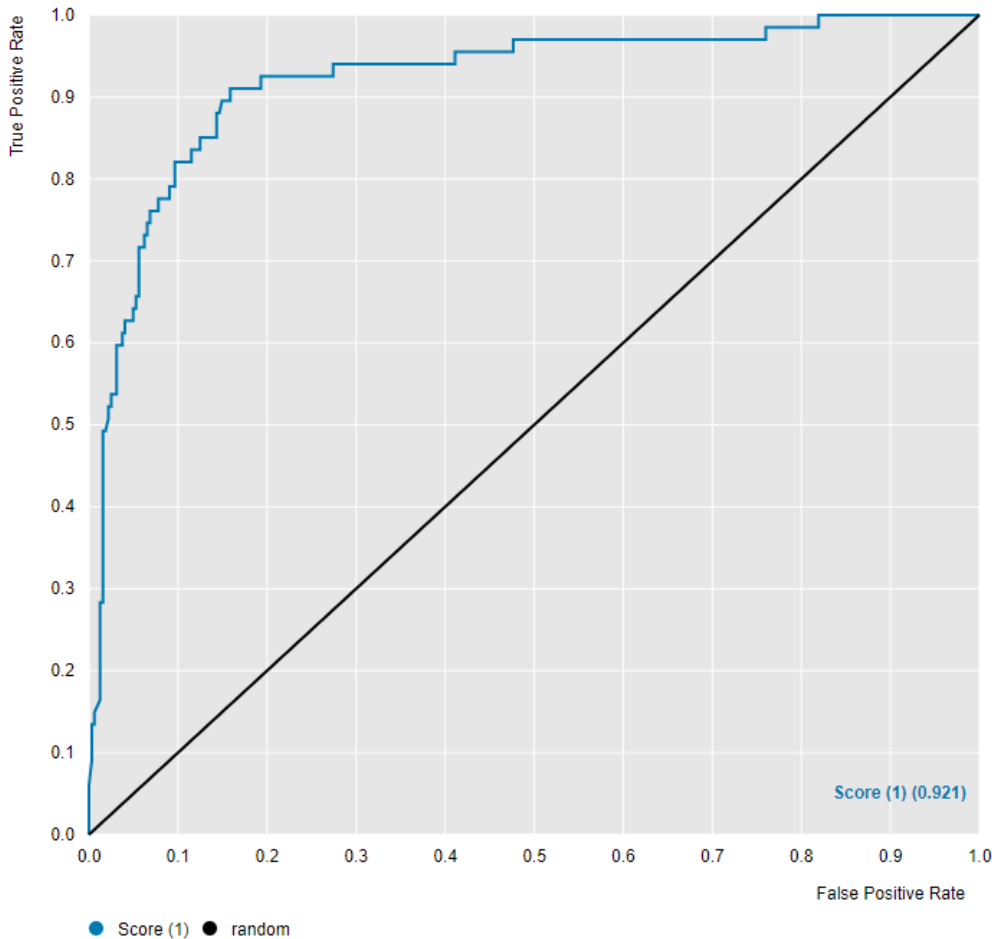

N=388

|                      |         |
|----------------------|---------|
| Top 10% Mean<br>IC50 | 10.5 nM |
|----------------------|---------|

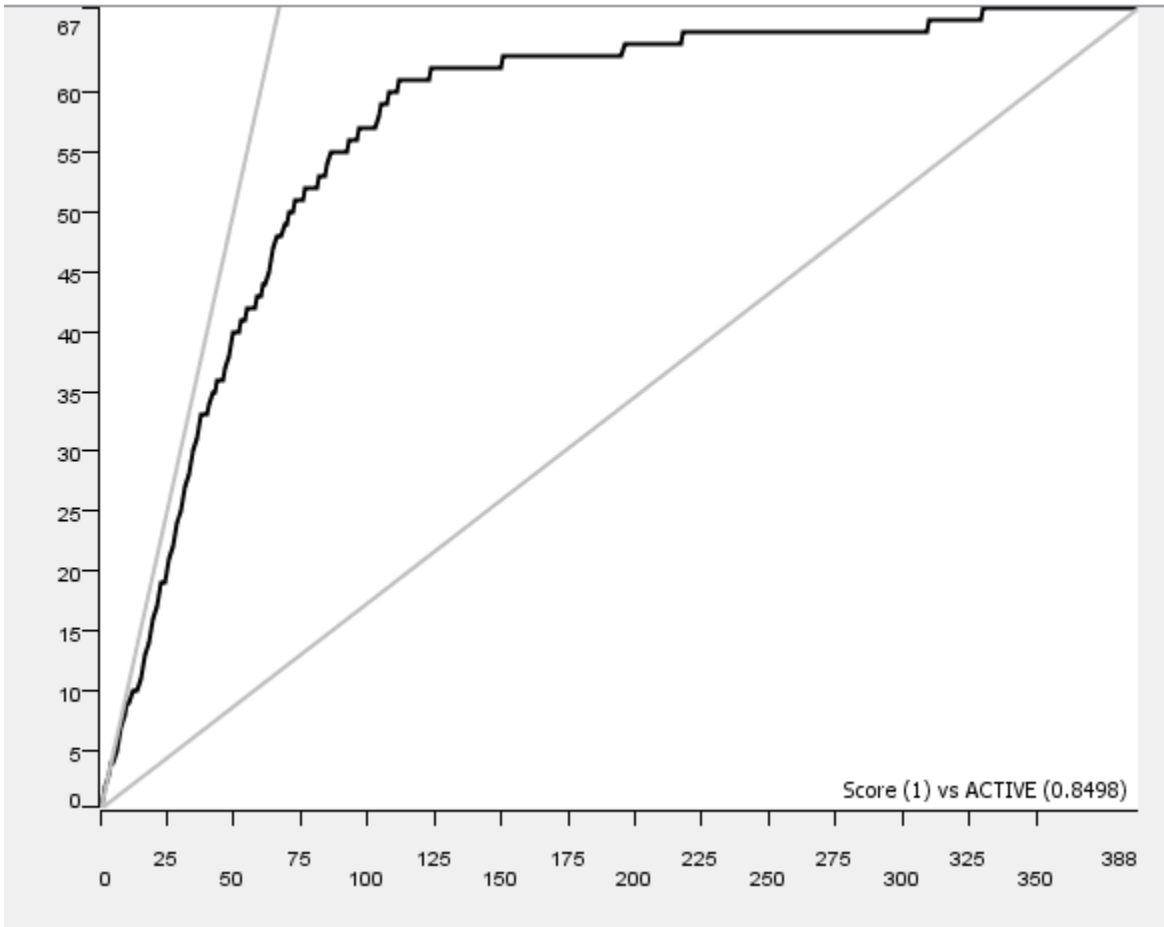

|          | Predicted Active | Predicted Inactive |
|----------|------------------|--------------------|
| Active   | 60               | 7                  |
| Inactive | 48               | 273                |

# <15 nM DefGood in PARP1

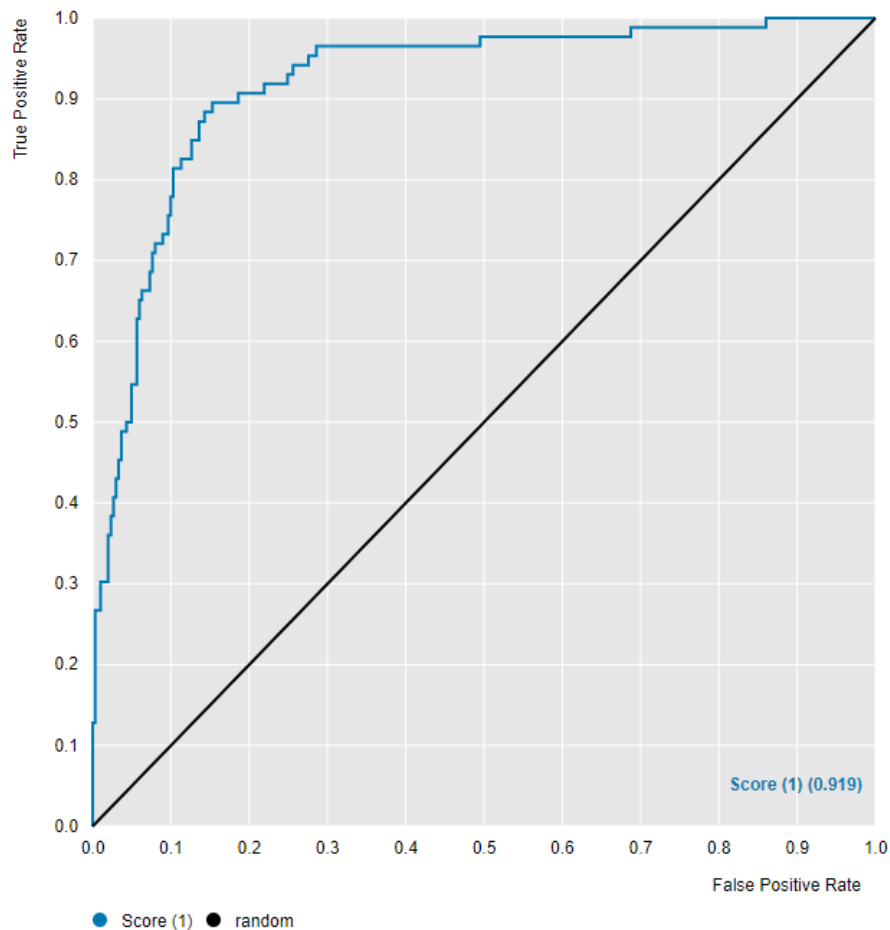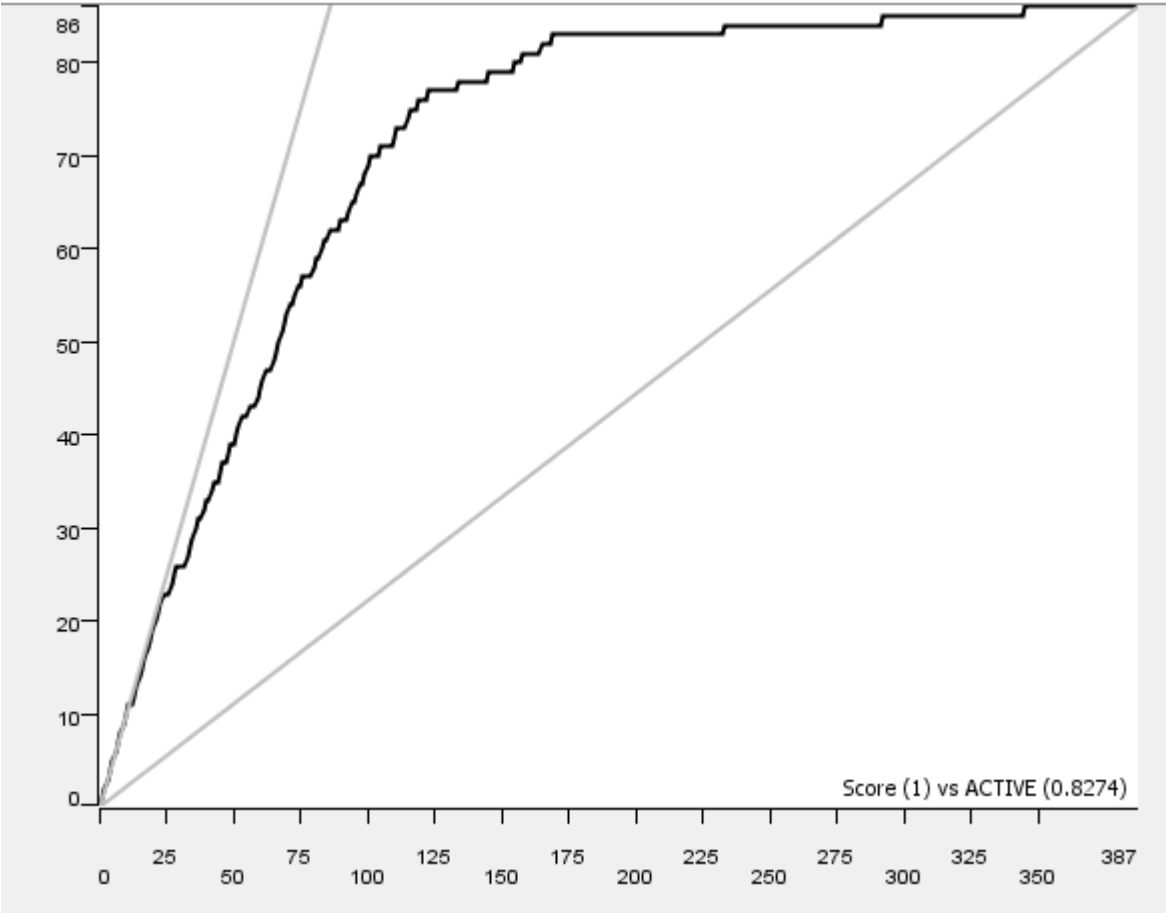

N=388

|                   |         |
|-------------------|---------|
| Top 10% Mean IC50 | 13.4 nM |
|-------------------|---------|

|          | Predicted Active | Predicted Inactive |
|----------|------------------|--------------------|
| Active   | 76               | 10                 |
| Inactive | 45               | 256                |

# <20 nM DefGood in PARP1

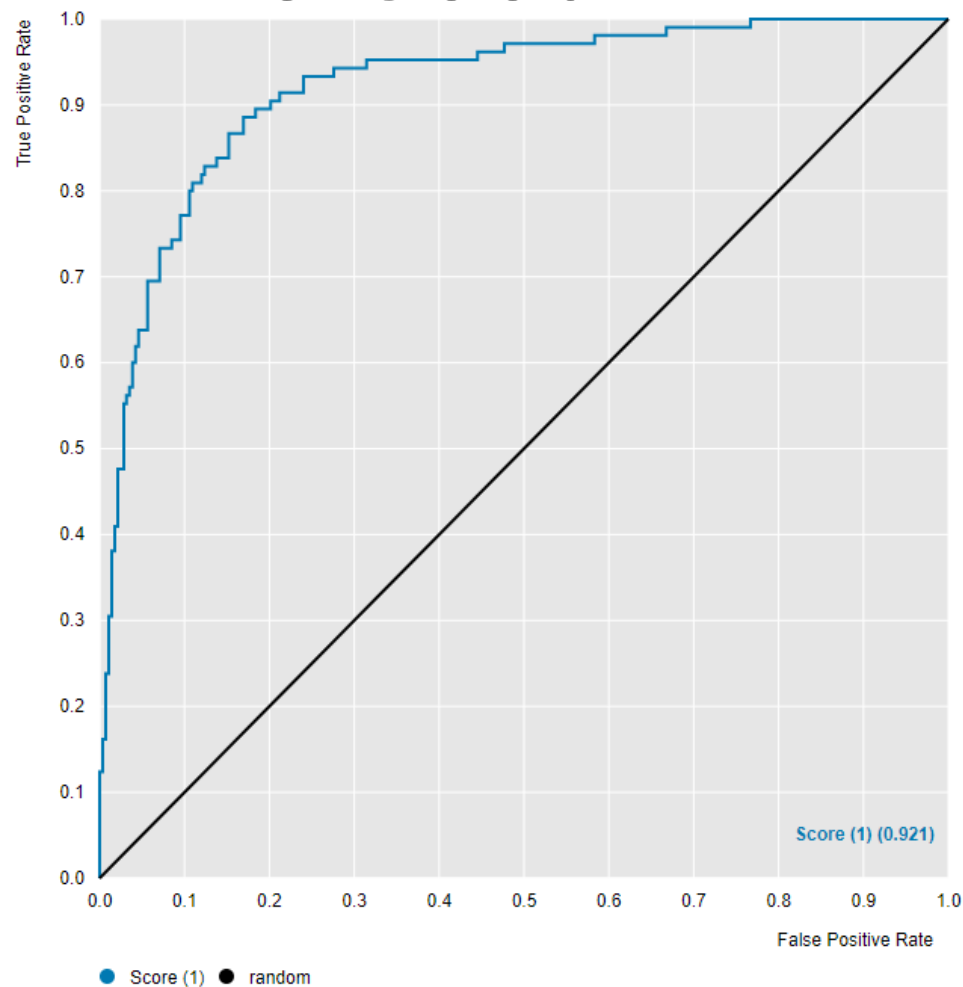

N=388

|                      |        |
|----------------------|--------|
| Top 10% Mean<br>IC50 | 7.5 nM |
|----------------------|--------|

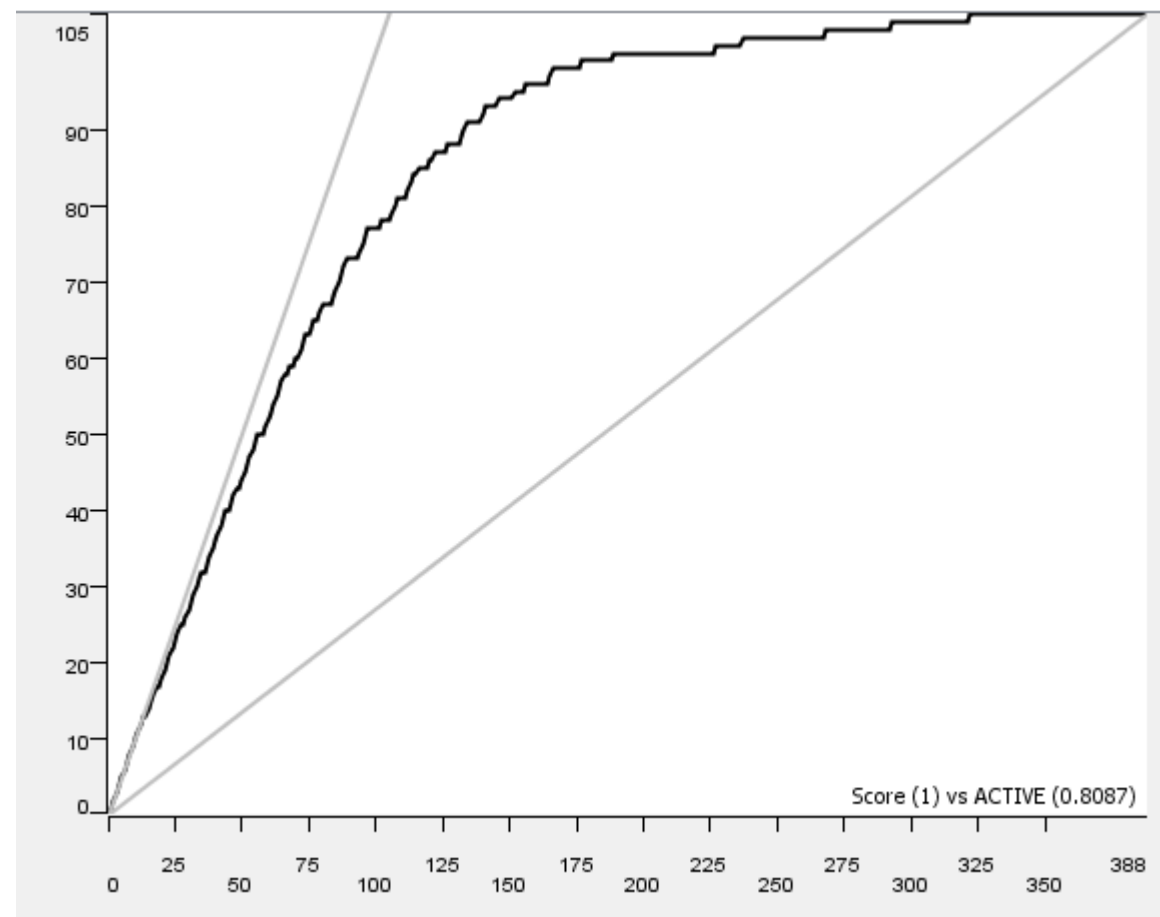

|          | Predicted Active | Predicted Inactive |
|----------|------------------|--------------------|
| Active   | 88               | 17                 |
| Inactive | 42               | 241                |

# <25 nM DefGood in PARP1

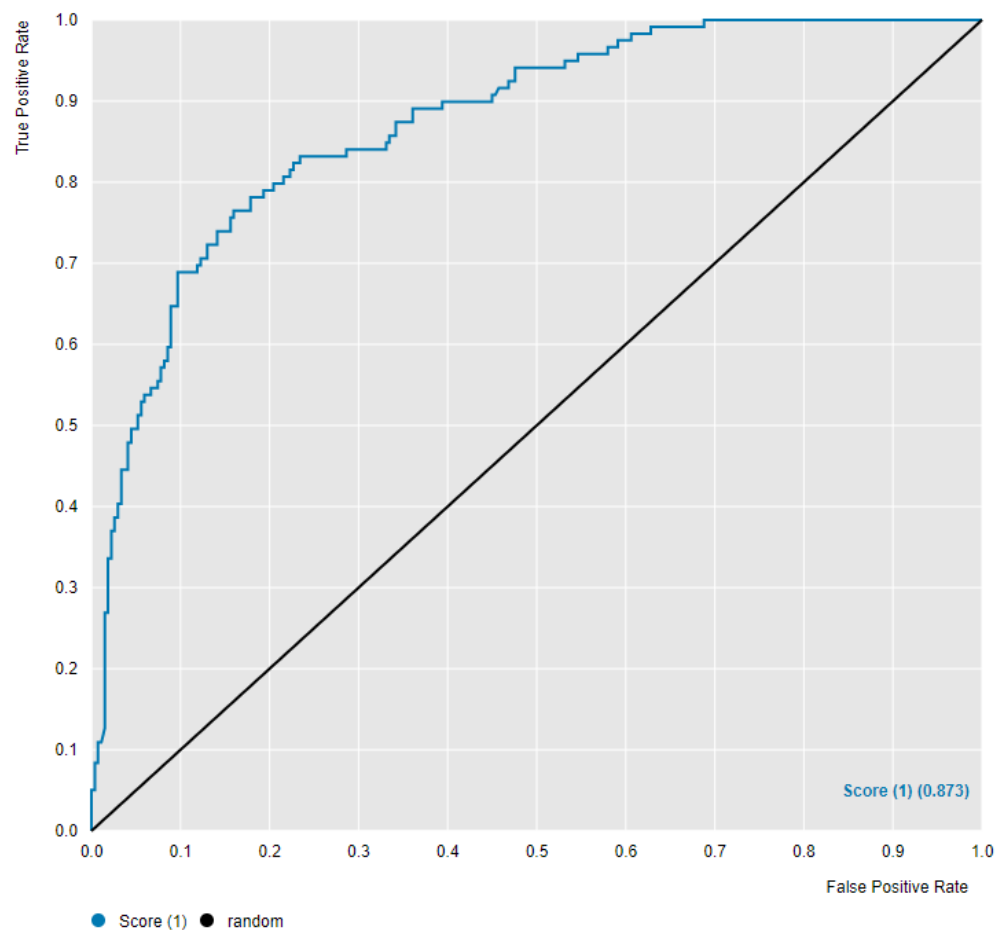

N=388

| Top 10% Mean IC50 | 15.7 nM |
|-------------------|---------|
|-------------------|---------|

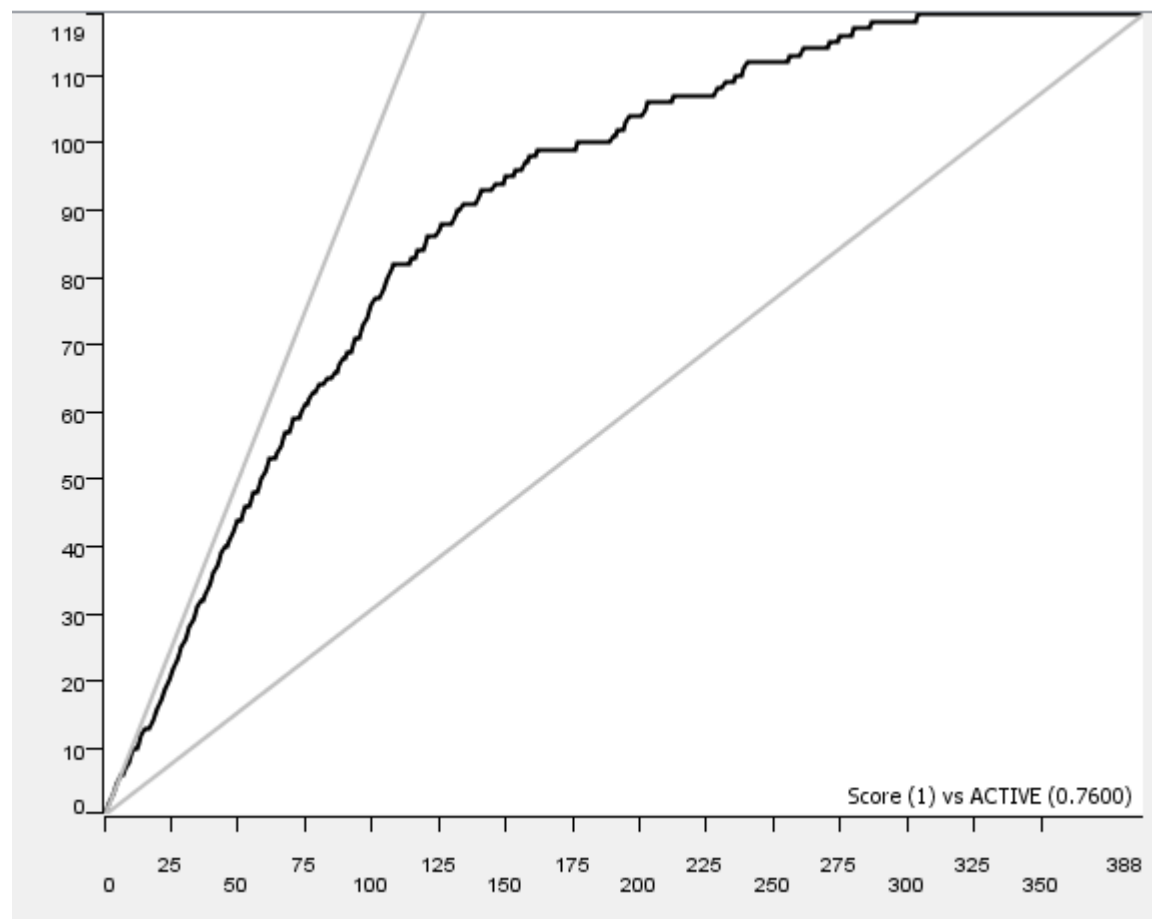

|          | Predicted Active | Predicted Inactive |
|----------|------------------|--------------------|
| Active   | 89               | 30                 |
| Inactive | 42               | 227                |

# Decision on DefGood

- <20 nM has the best performance with regard to enrichment and mean top 10% IC50.

# RF - <20 nM DefGood in PARP1

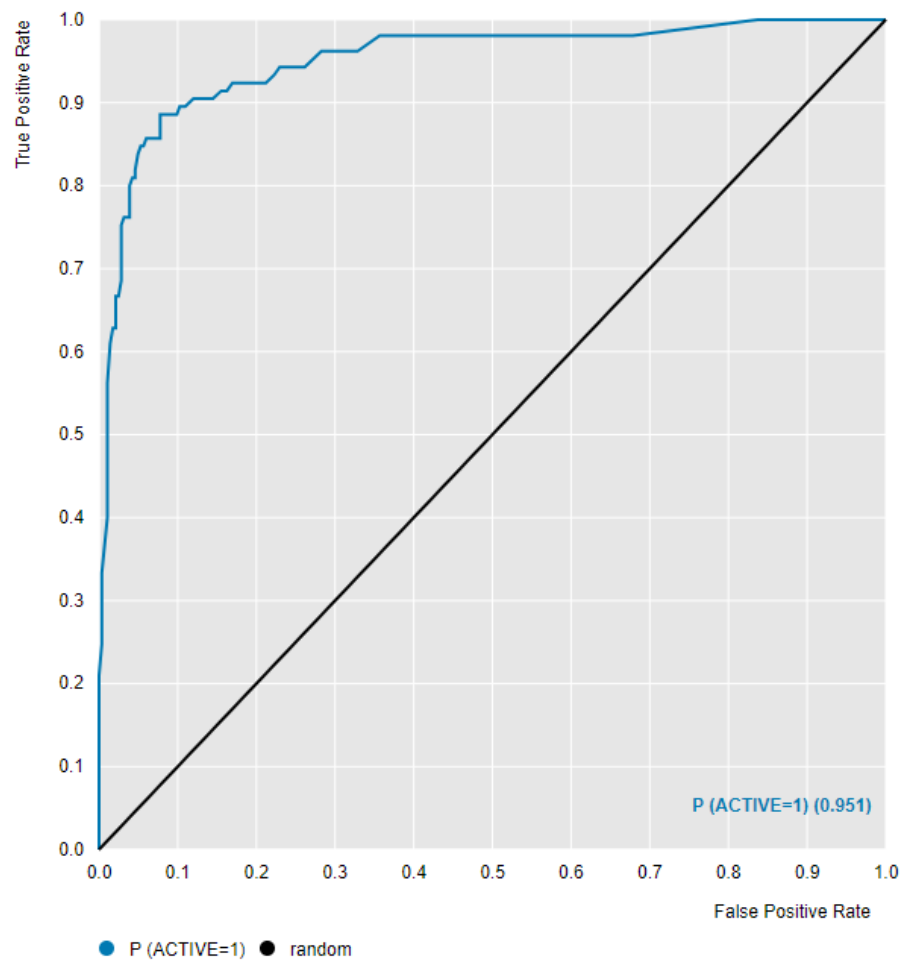

N=388

|                   |        |
|-------------------|--------|
| Top 10% Mean IC50 | 6.1 nM |
|-------------------|--------|

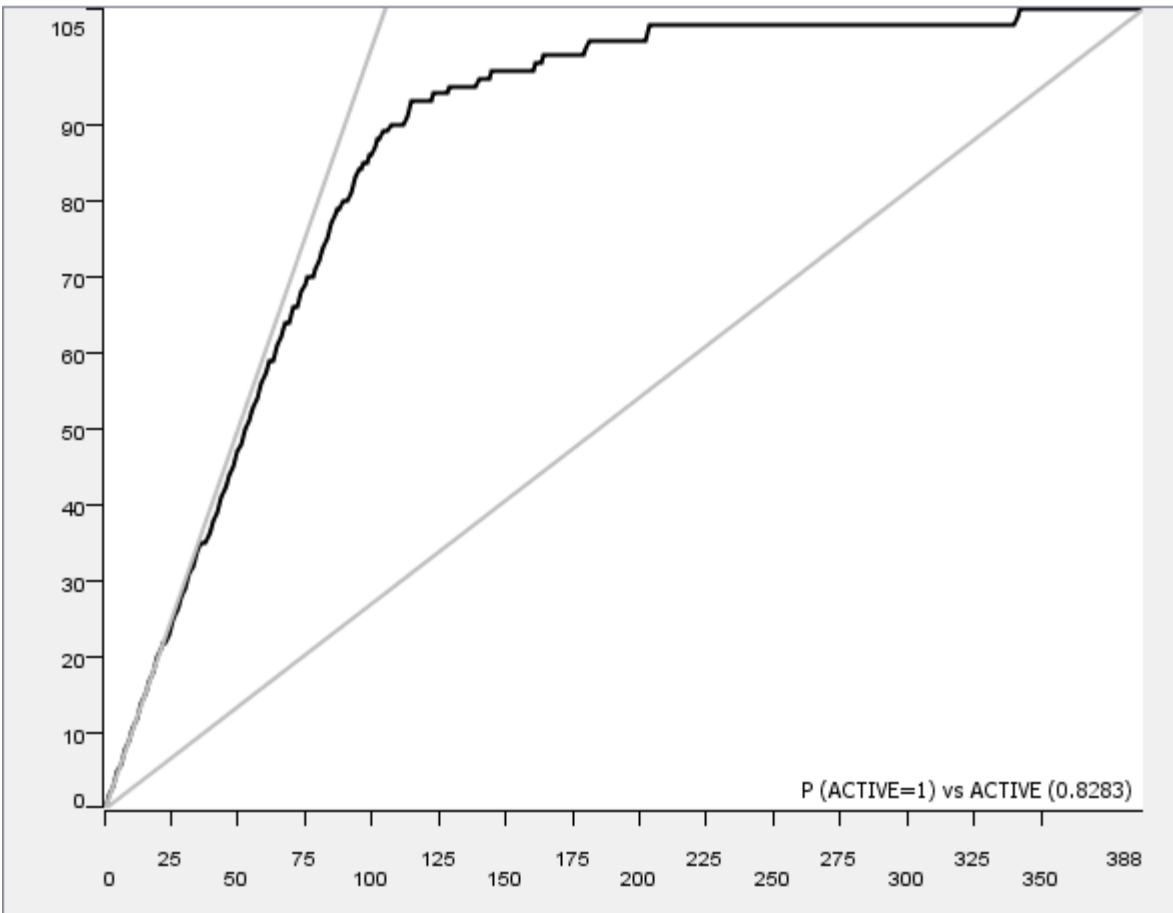

|          | Predicted Active | Predicted Inactive |
|----------|------------------|--------------------|
| Active   | 90               | 15                 |
| Inactive | 17               | 266                |



# Decision on DefGood - RF

- Work in ALK showed DefGood in the NBN was similar to DefGood in an RF. Therefore, this value for DefGood from the NBN design was used as DefGood.

# PNN - <20 nM DefGood in PARP1

- Properties List (46 calculatable properties were used)
- Parameterization (Global Accuracy for Activity at a 20 nM decision value was used, and a 5-fold stratified sampling cross validation was used to parameterize theta minus and theta plus) Theta Minus = 0.05 and Theta Plus = 0.55

# PNN - <20 nM DefGood in PARP1

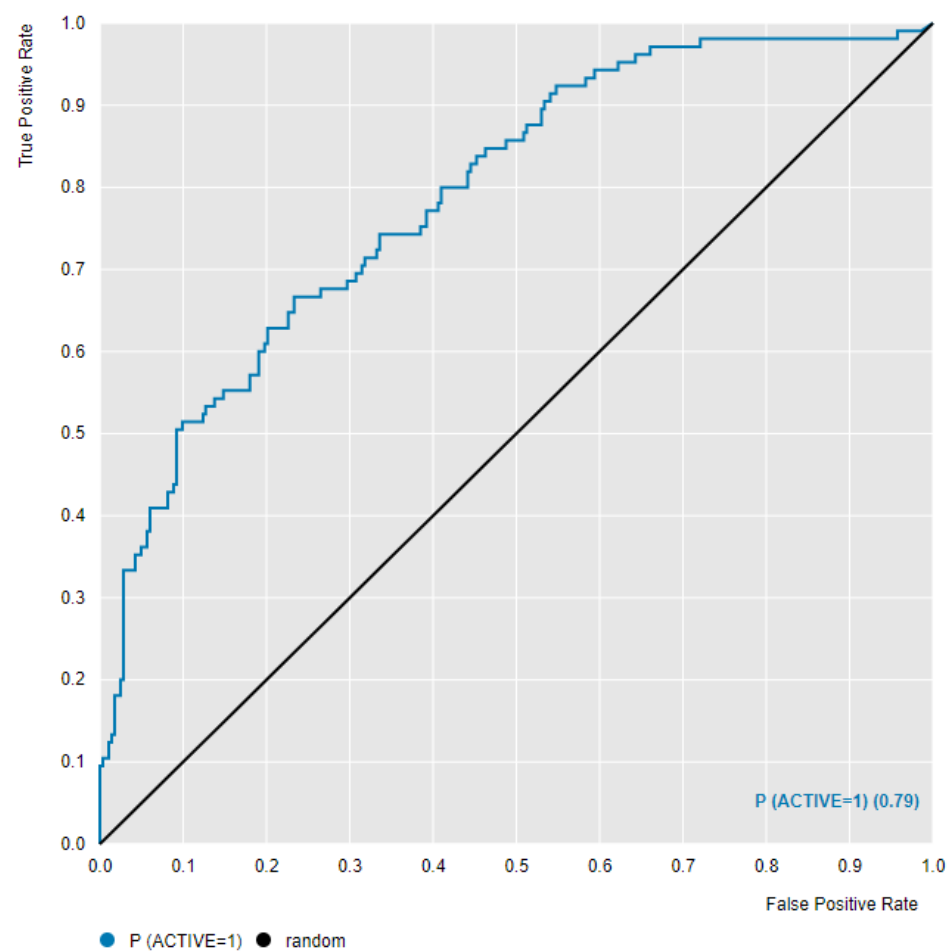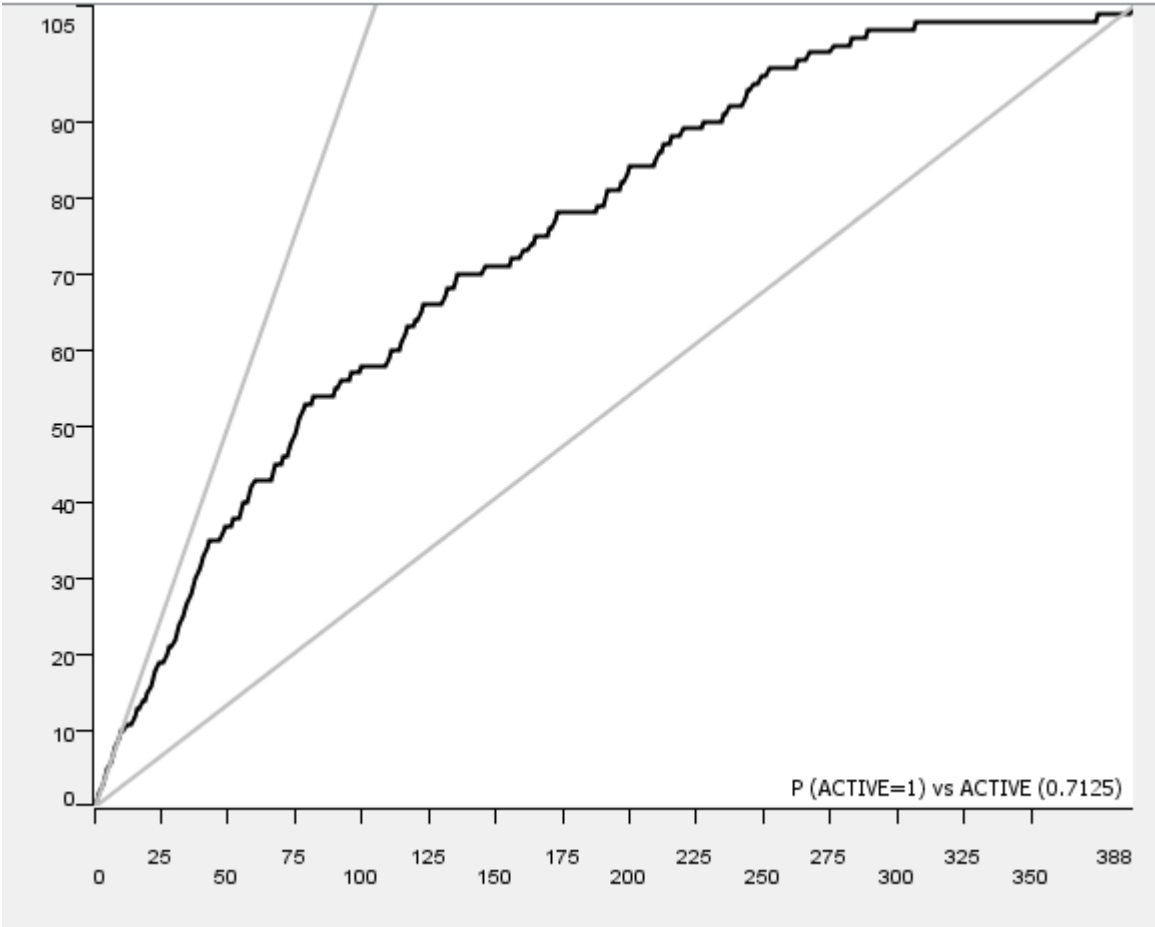

N=388

| Top 10% Mean IC50 | 47.7 nM |
|-------------------|---------|
|-------------------|---------|

|          | Predicted Active | Predicted Inactive |
|----------|------------------|--------------------|
| Active   | 19               | 86                 |
| Inactive | 5                | 278                |

# Decision on DefGood - PNN

- Parameterization resulted in a useful PNN with the  $<20$  nM DefGood. Parameterization for each model adds significant time to the process. A rough benchmark can be applied where point of failure is discovered and then the model is parameterized to ensure that the situation is optimal for the PNN. This will be applied to the discovery of the error tolerance threshold for the PNN as was done in the beta 2 adrenergic receptor space.

# NBN Error Tolerance- <20 nM DefGood in PARP1

- 0-50% absolute error

<20 nM DefGood in PARP1, 5% error; Random seed = 1515533876005

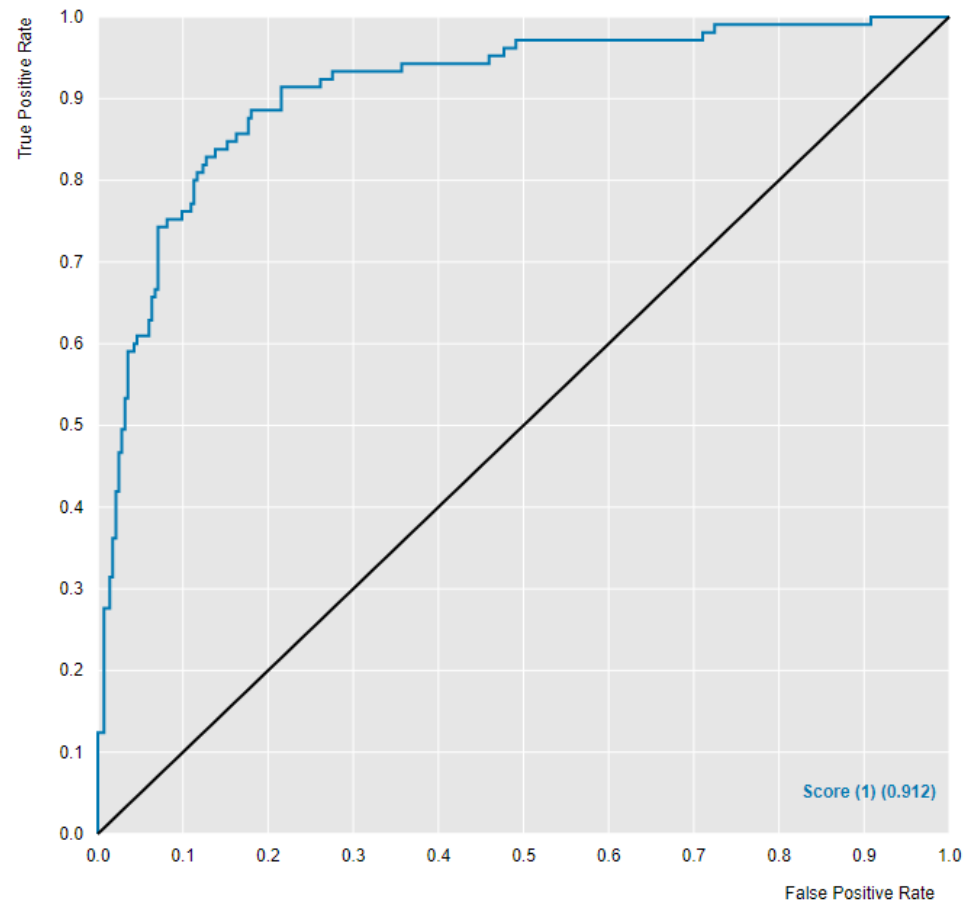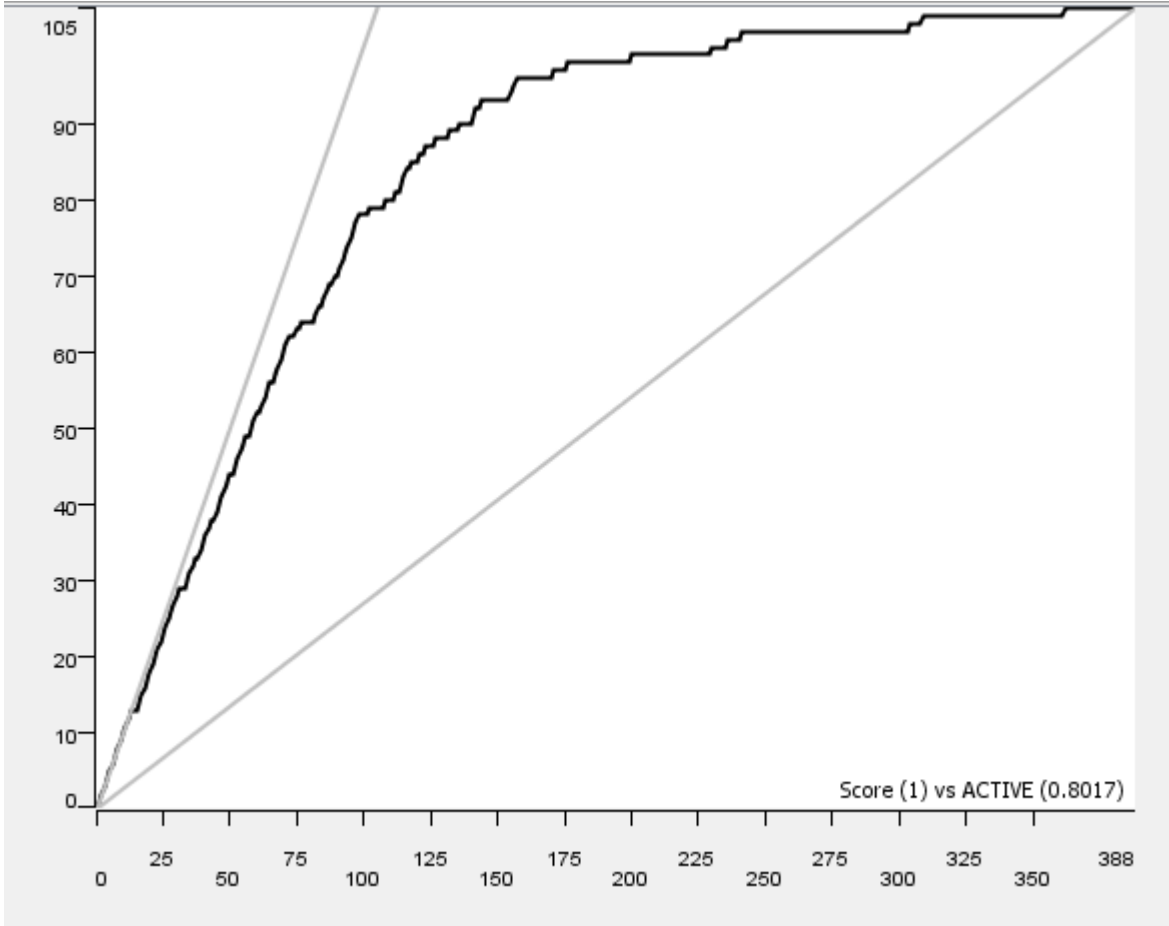

N=388

● Score (1) ● random

Top 10% Mean IC50  
10,200 nM  
One >380,000 mistake at the bottom

|          | Predicted Active | Predicted Inactive |
|----------|------------------|--------------------|
| Active   | 90               | 15                 |
| Inactive | 50               | 233                |

<20nM DefGood in PARP1, 5% error; Random seed = 429

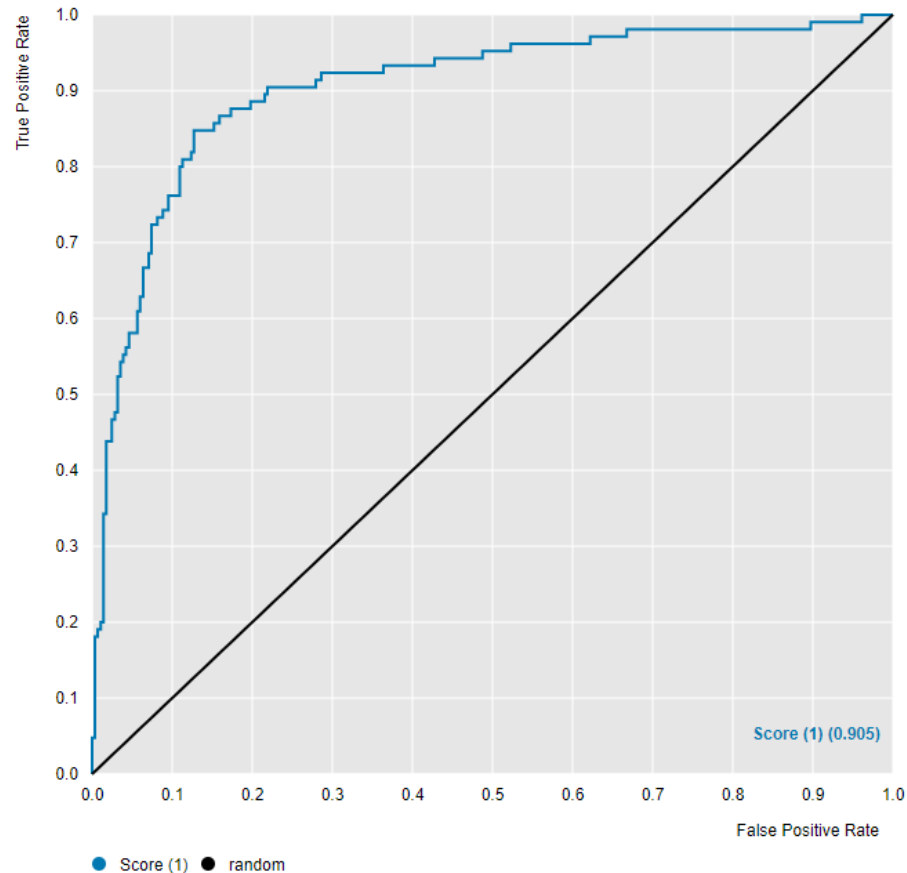

N=388

| Top 10% Mean IC50 | 9.6 nM |
|-------------------|--------|
|-------------------|--------|

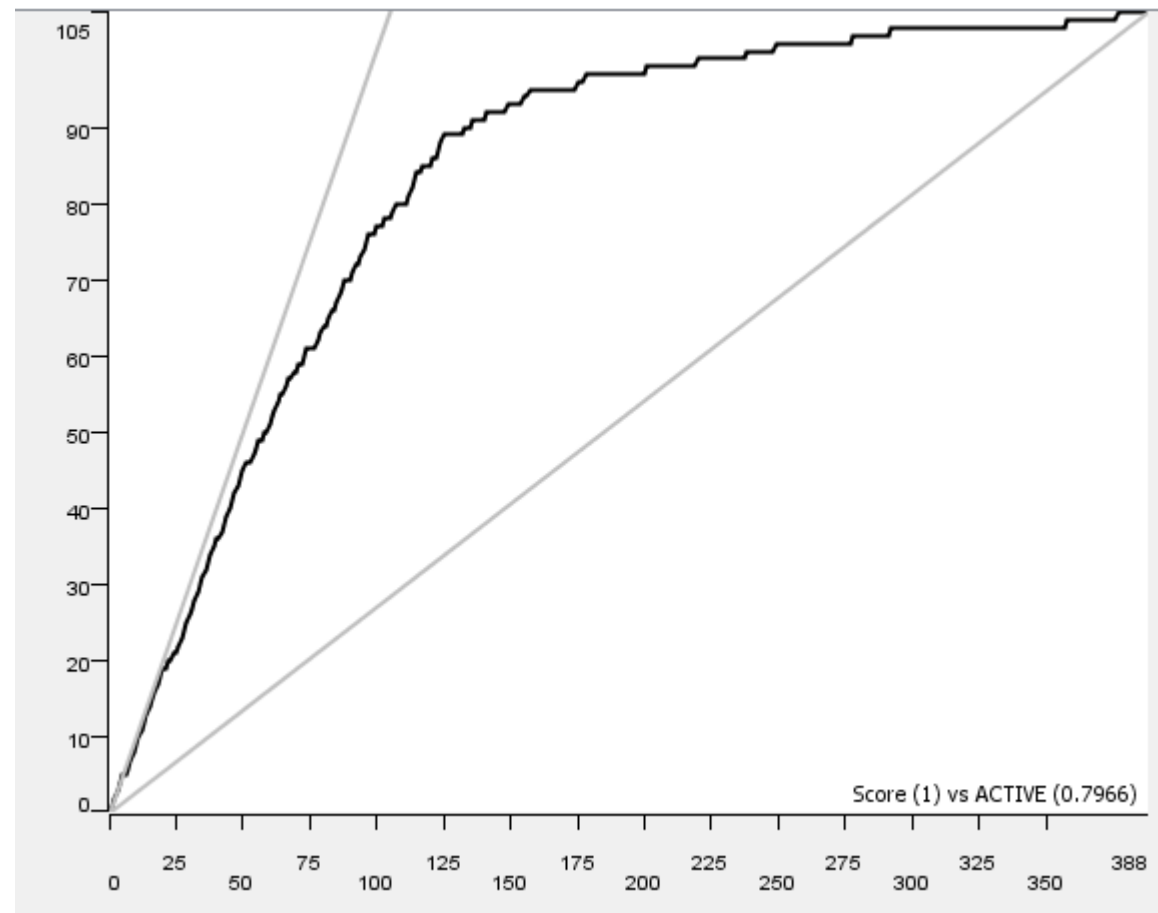

|          | Predicted Active | Predicted Inactive |
|----------|------------------|--------------------|
| Active   | 89               | 16                 |
| Inactive | 41               | 242                |

<20nM DefGood in PARP1, 10% error;  
Random seed = 429

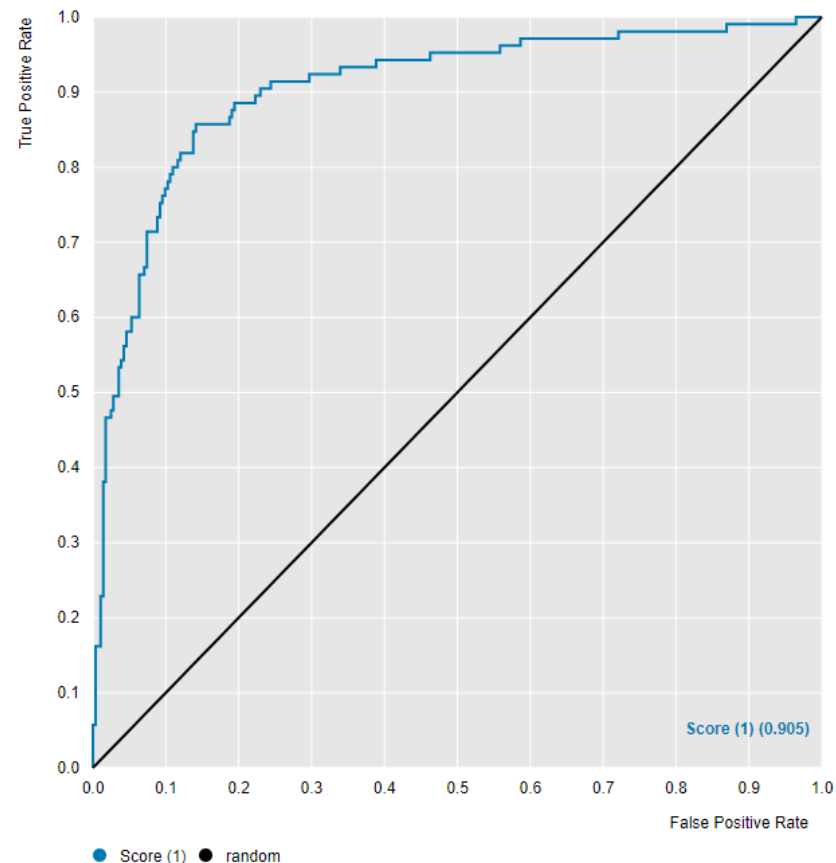

N=388

| Top 10% Mean<br>IC50 | 9.5 nM |
|----------------------|--------|
|----------------------|--------|

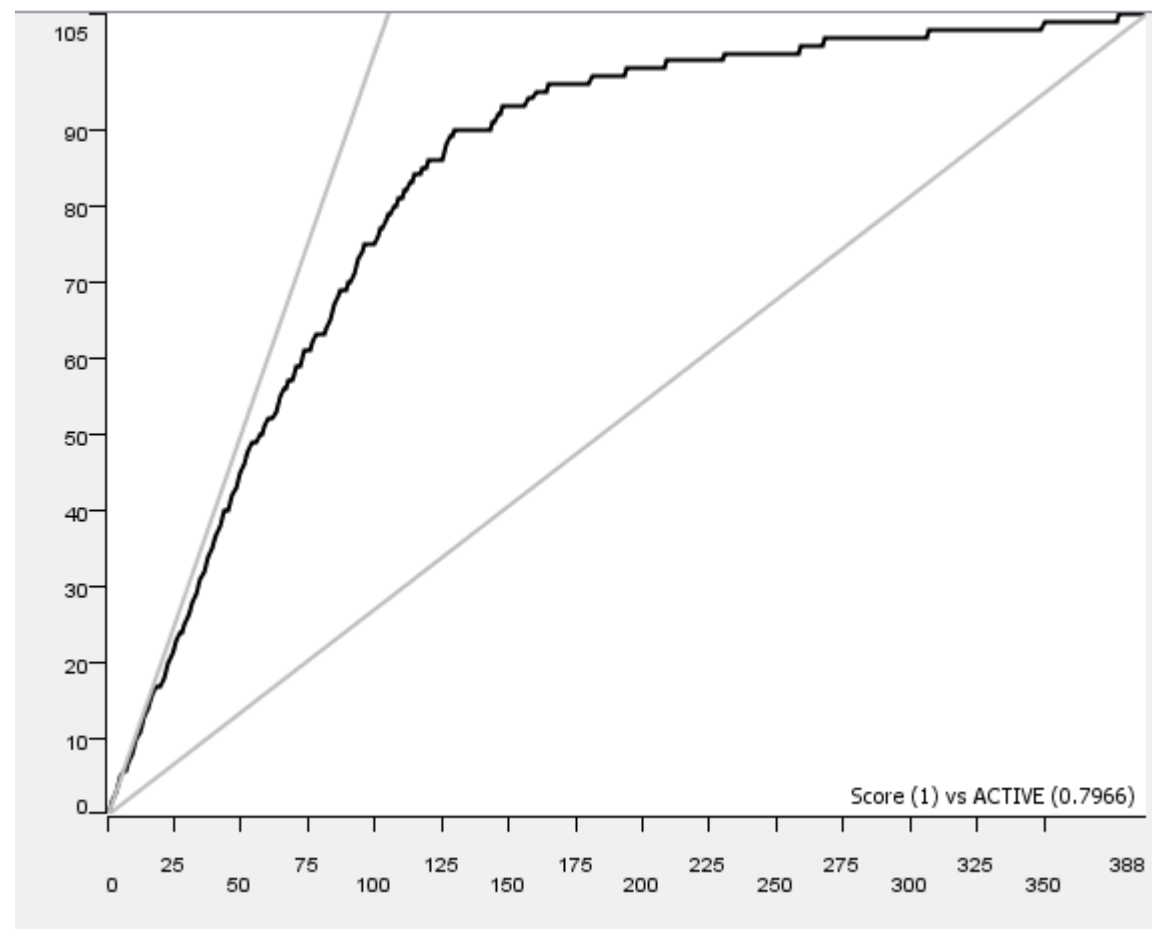

|          | Predicted Active | Predicted Inactive |
|----------|------------------|--------------------|
| Active   | 90               | 15                 |
| Inactive | 42               | 241                |



<20nM DefGood in PARP1, 20% error;  
Random seed = 429

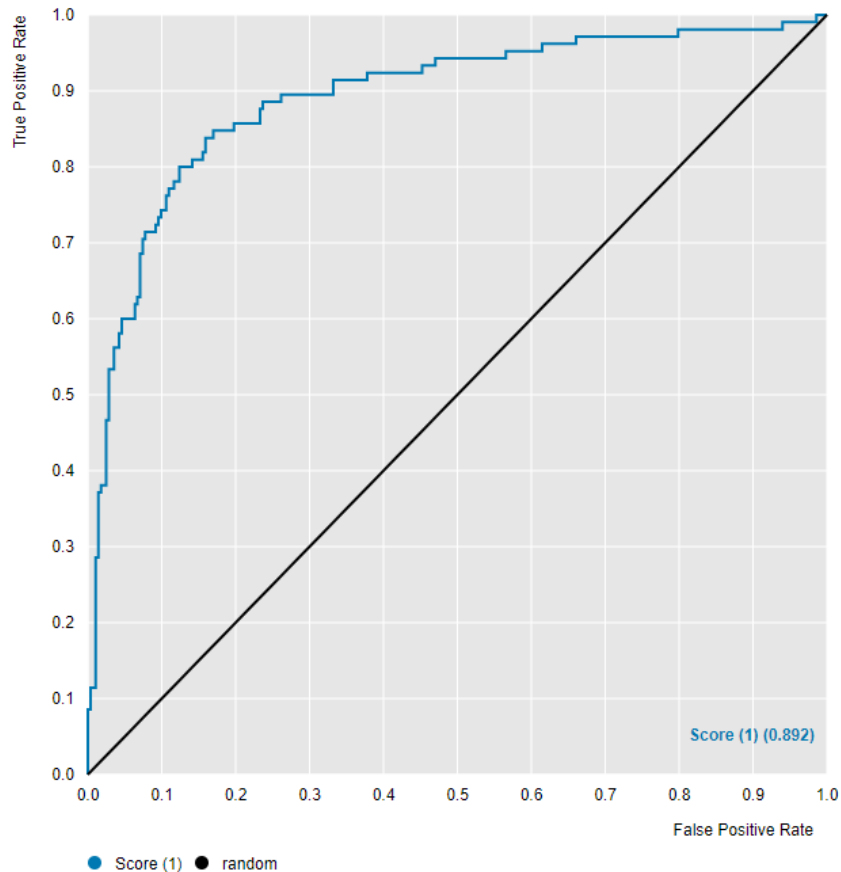

N=388

Top 10% Mean  
IC50

9.6 nM

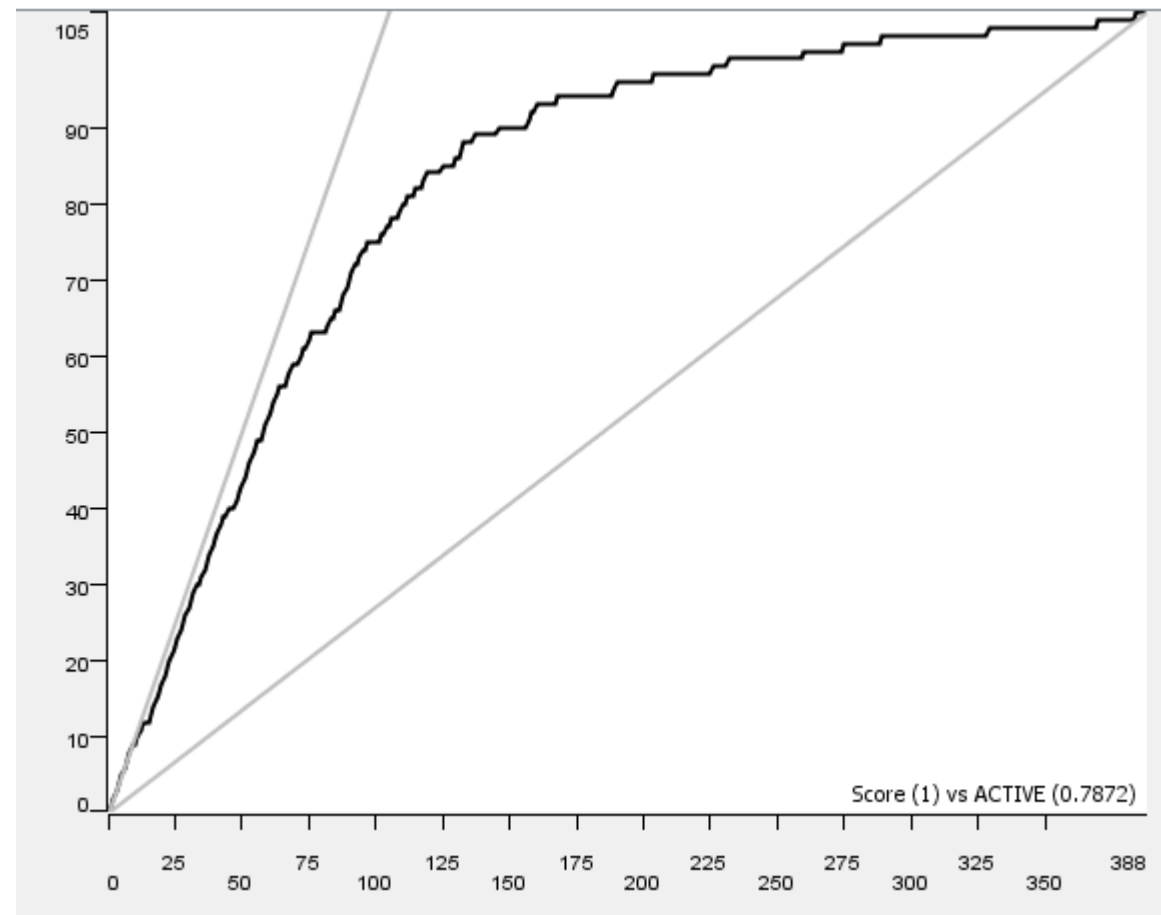

|          | Predicted Active | Predicted Inactive |
|----------|------------------|--------------------|
| Active   | 78               | 27                 |
| Inactive | 30               | 253                |

<20nM DefGood in PARP1, 30% error;  
Random seed = 429

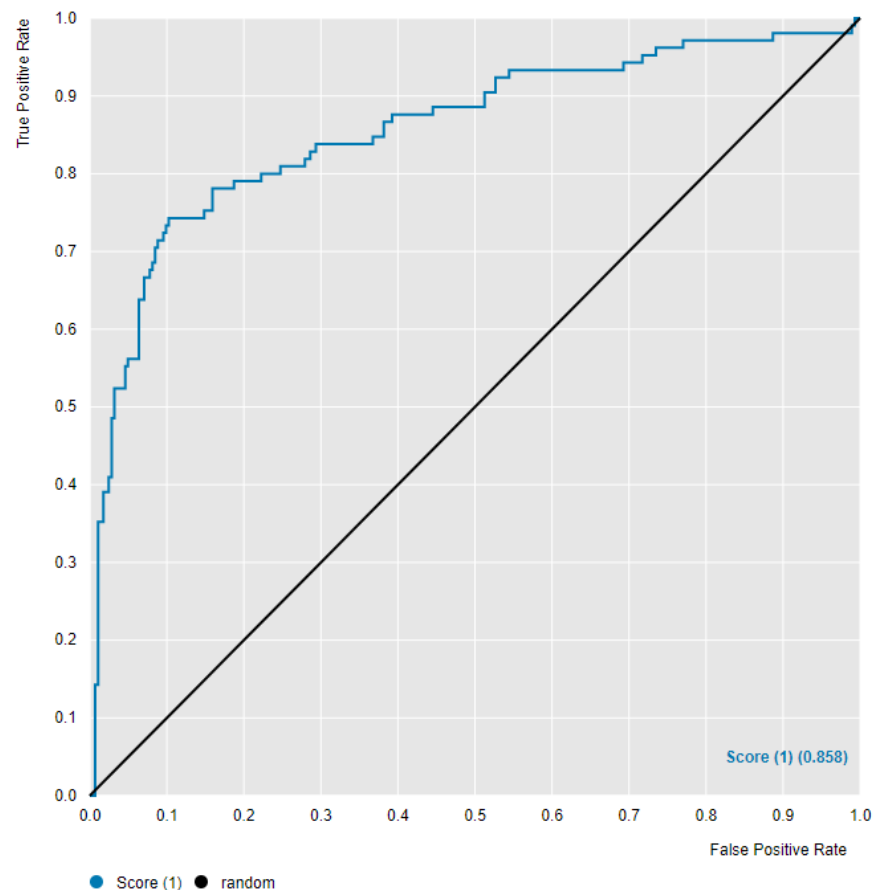

N=388

Top 10% Mean  
IC50

9.2 nM

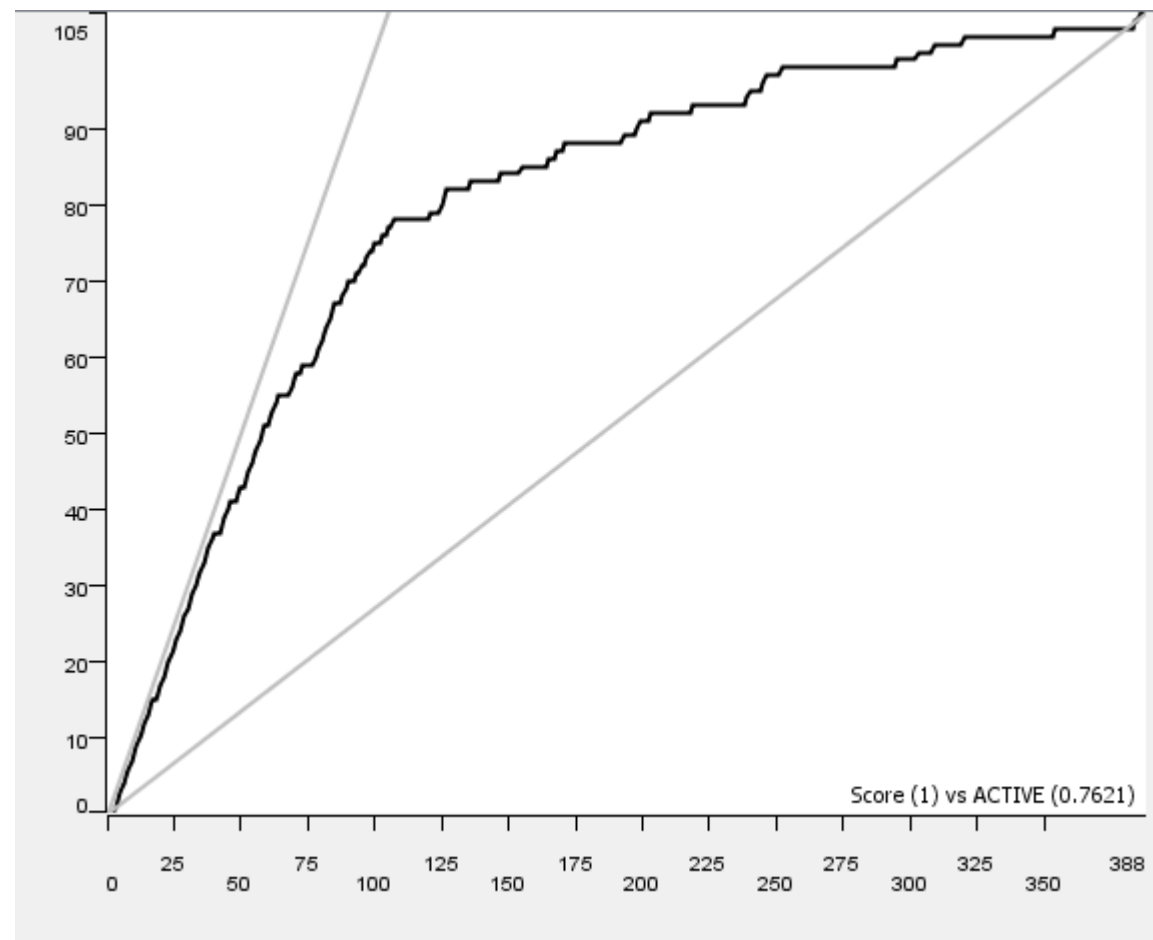

|          | Predicted Active | Predicted Inactive |
|----------|------------------|--------------------|
| Active   | 87               | 18                 |
| Inactive | 82               | 201                |

<20nM DefGood in PARP1, 40% error;  
Random seed = 429

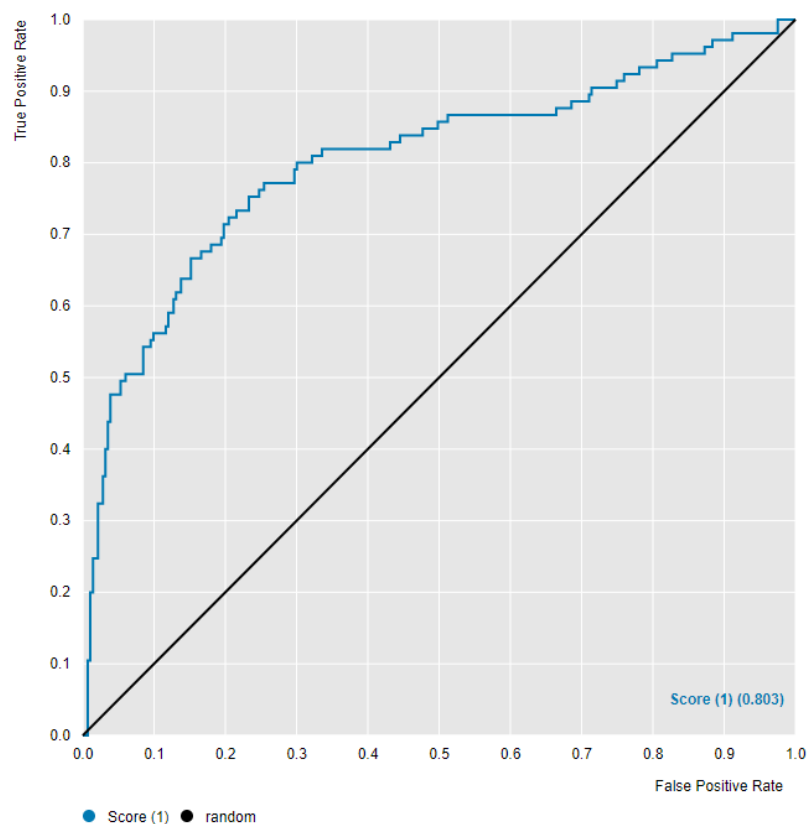

N=388

Top 10% Mean  
IC50

510 nM

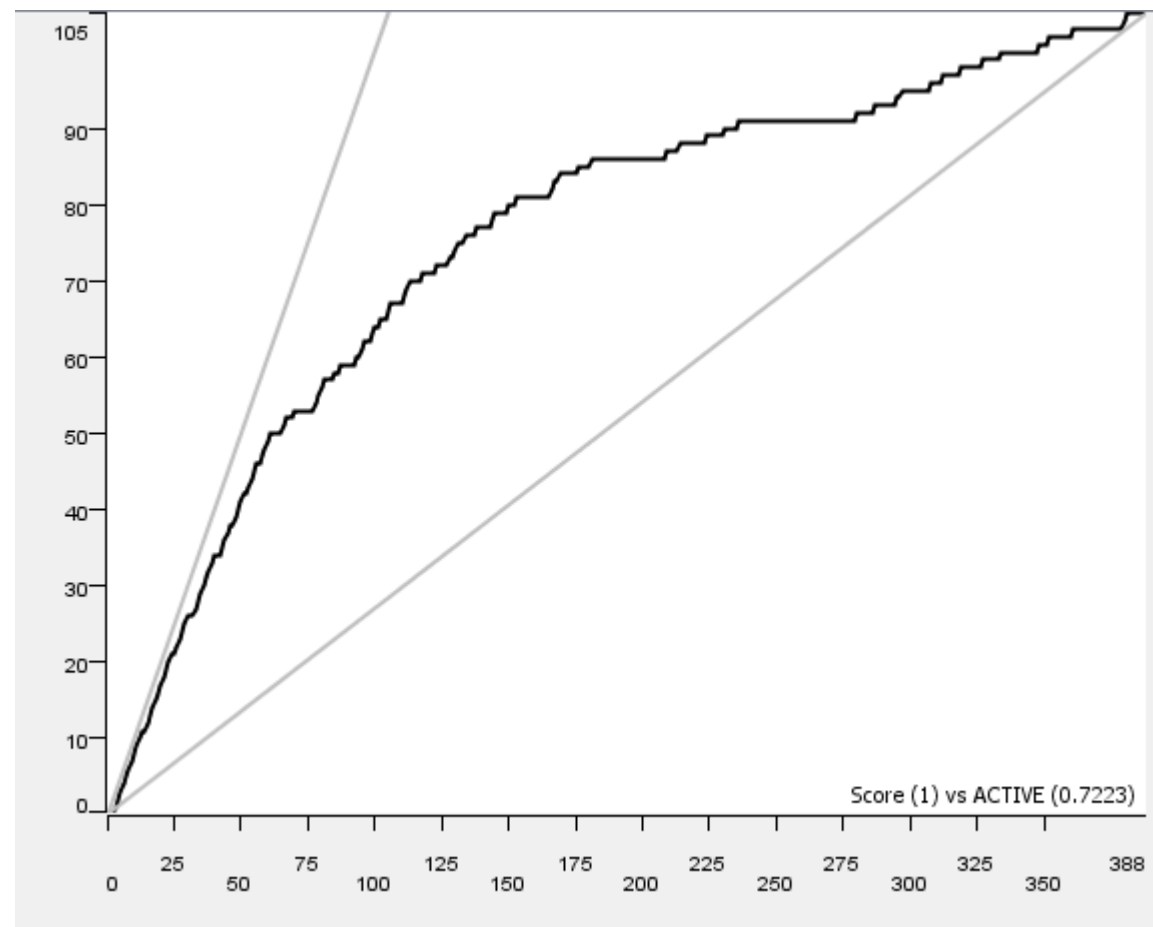

|          | Predicted Active | Predicted Inactive |
|----------|------------------|--------------------|
| Active   | 77               | 28                 |
| Inactive | 61               | 222                |

<20nM DefGood in PARP1, 45% error;  
Random seed = 429

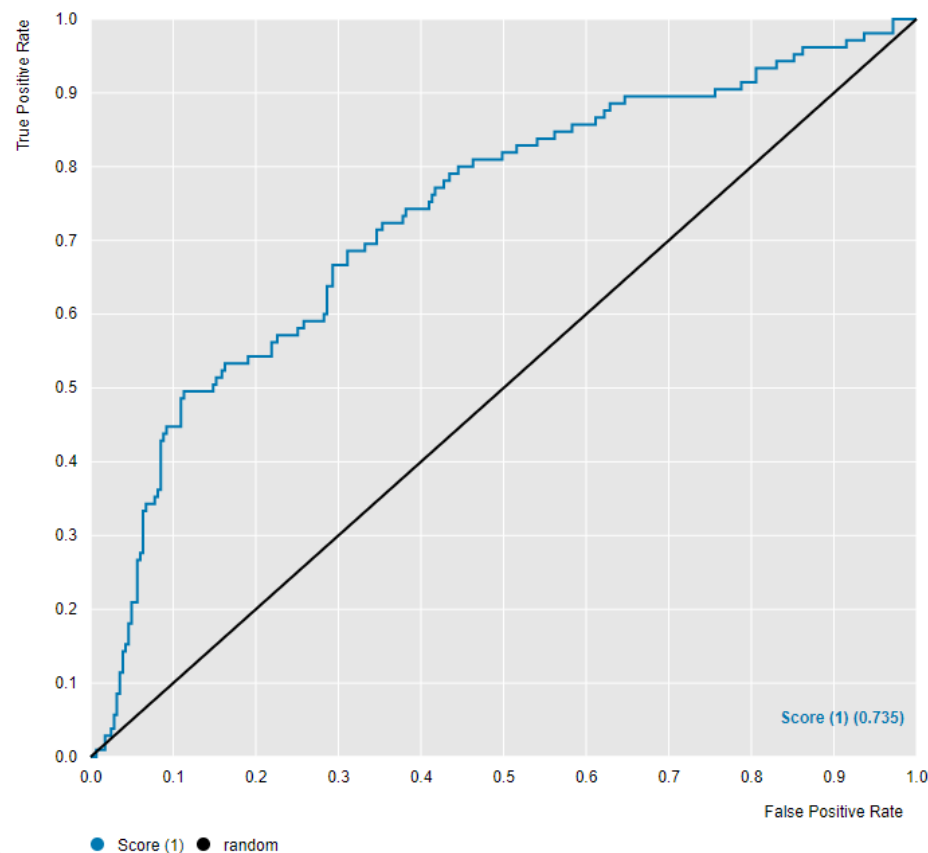

N=388

Top 10% Mean  
IC50

7,400 nM

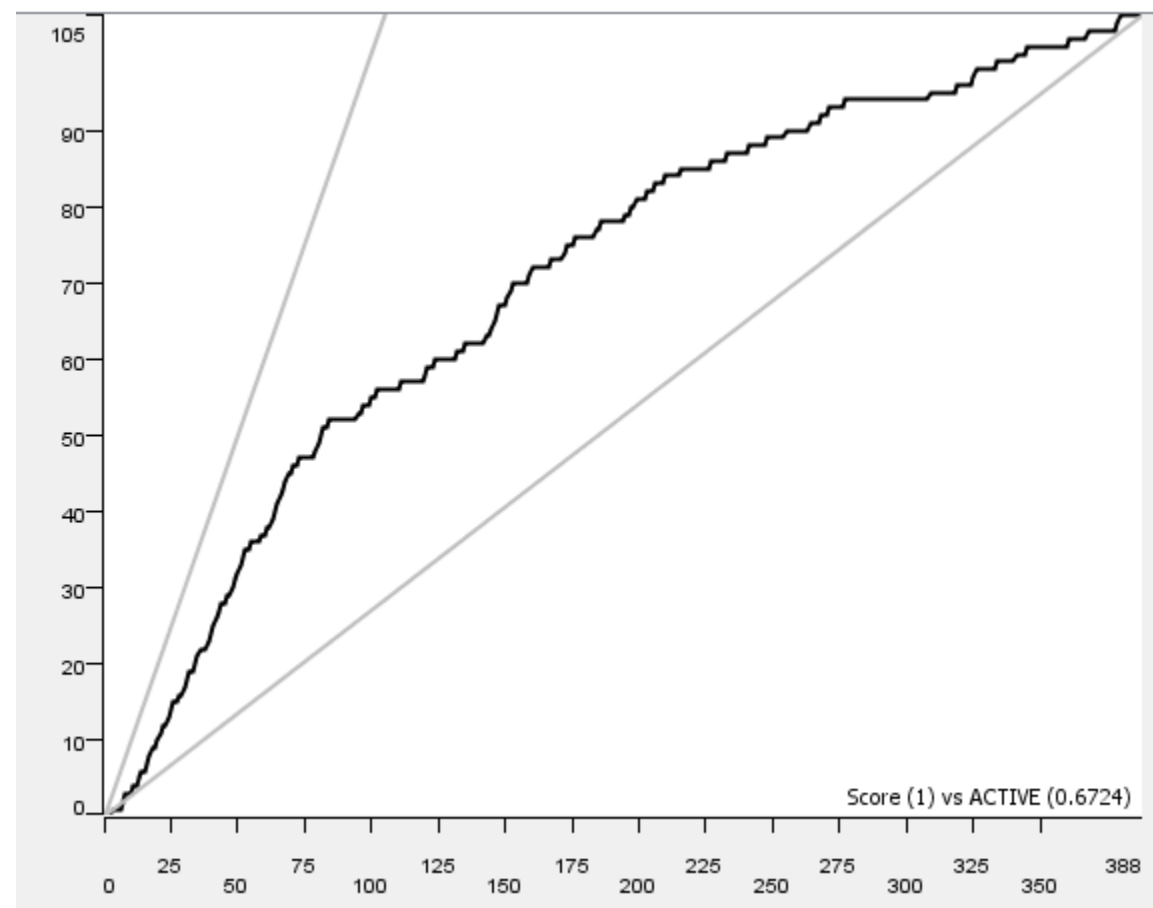

|          | Predicted Active | Predicted Inactive |
|----------|------------------|--------------------|
| Active   | 85               | 20                 |
| Inactive | 134              | 145                |

<20nM DefGood in PARP1, 20% error;  
Random seed = 121783

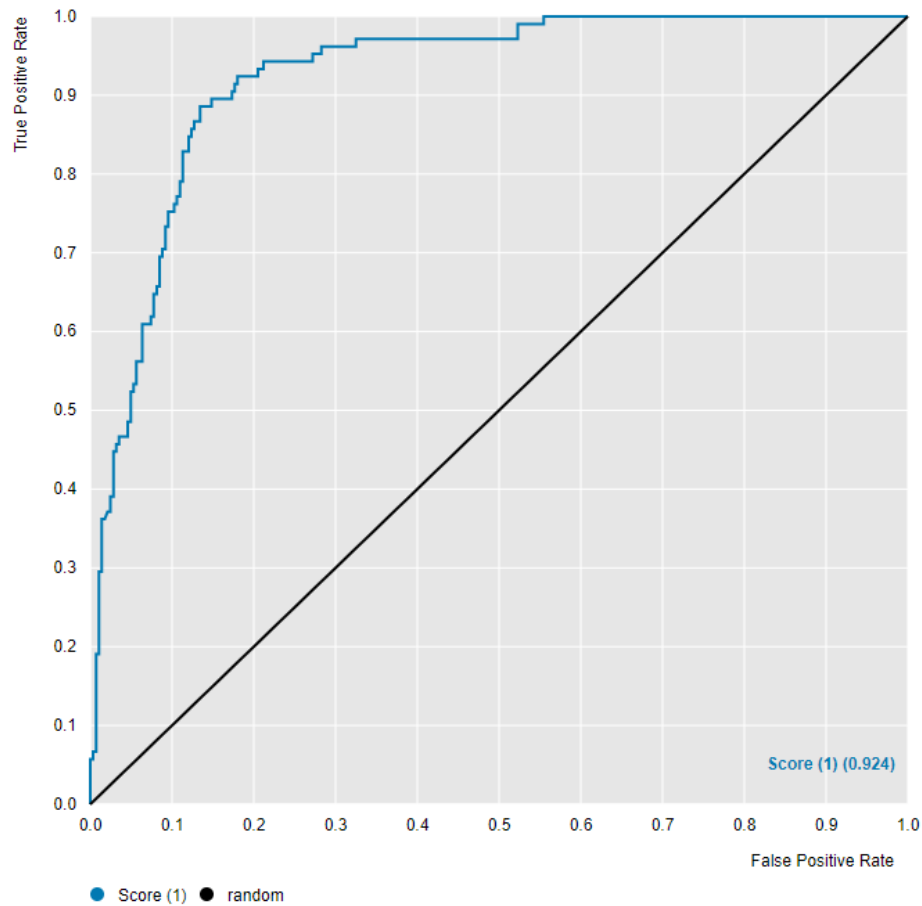

N=388

| Top 10% Mean IC50 | 13.2 nM |
|-------------------|---------|
|-------------------|---------|

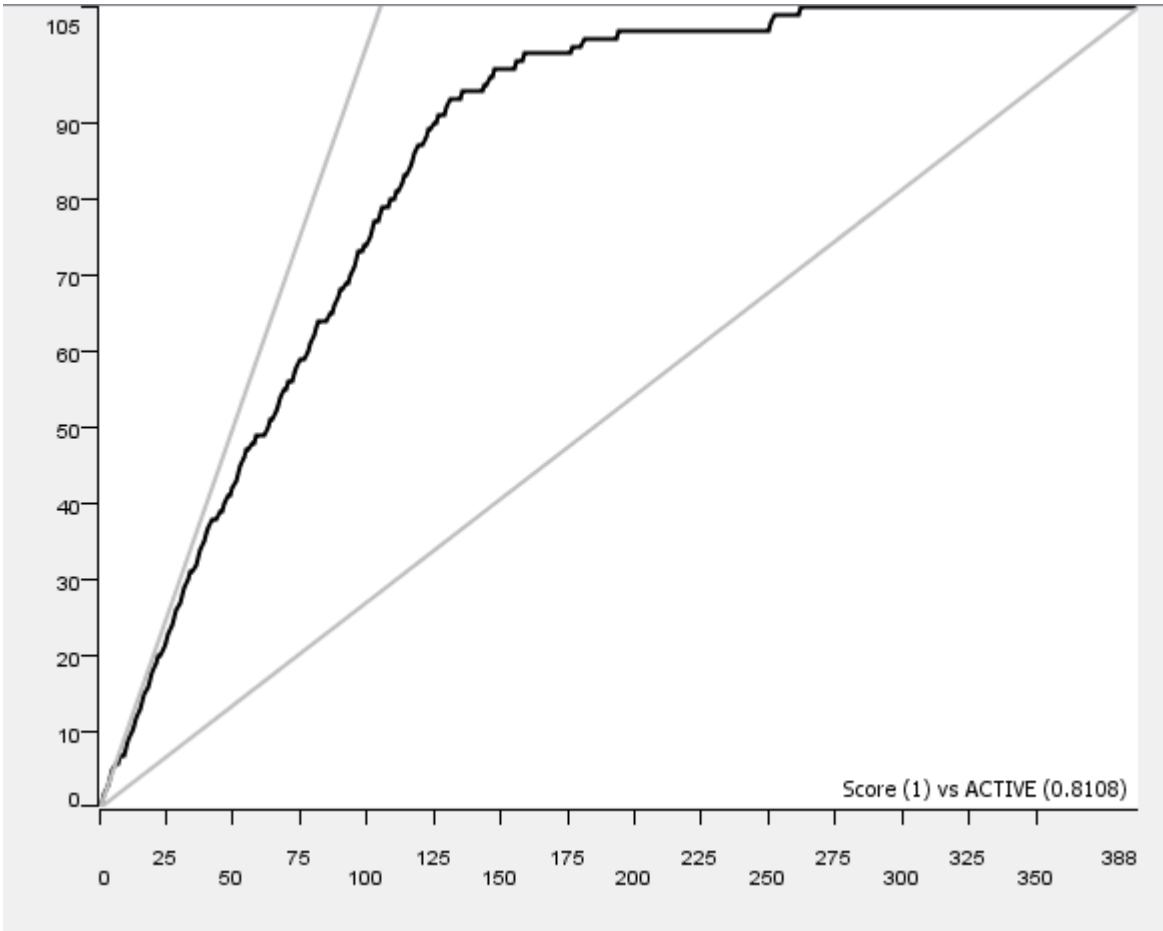

|          | Predicted Active | Predicted Inactive |
|----------|------------------|--------------------|
| Active   | 94               | 11                 |
| Inactive | 44               | 239                |

<20nM DefGood in PARP1, 30% error;  
Random seed = 121783

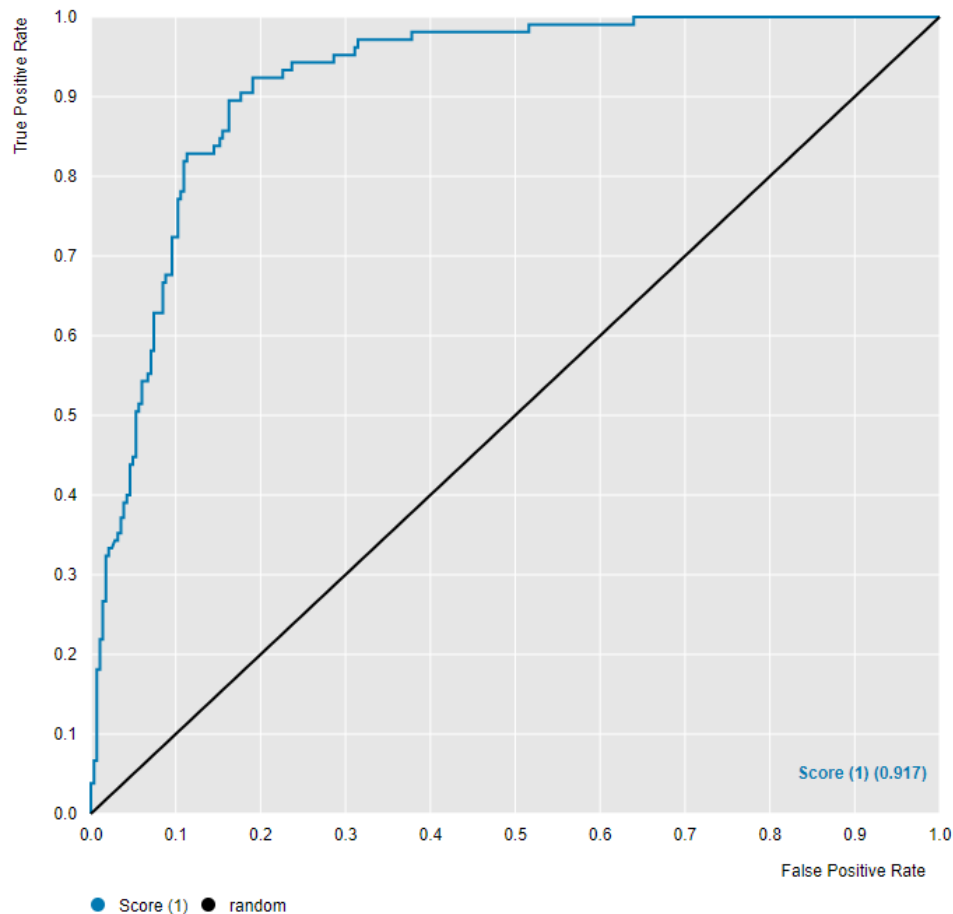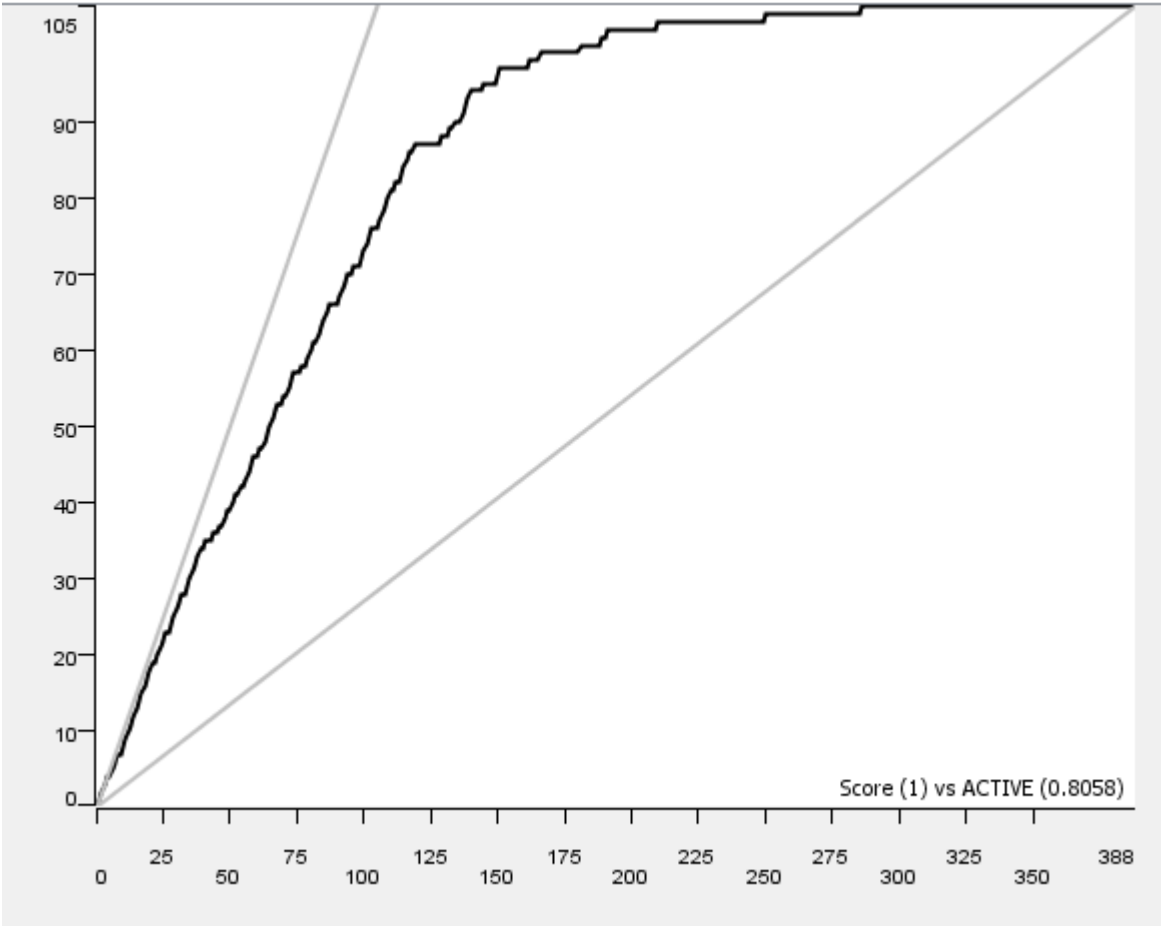

N=388

|                      |        |
|----------------------|--------|
| Top 10% Mean<br>IC50 | 9.4 nM |
|----------------------|--------|

|          | Predicted Active | Predicted Inactive |
|----------|------------------|--------------------|
| Active   | 87               | 18                 |
| Inactive | 36               | 247                |

<20nM DefGood in PARP1, 40% error;  
Random seed = 121783

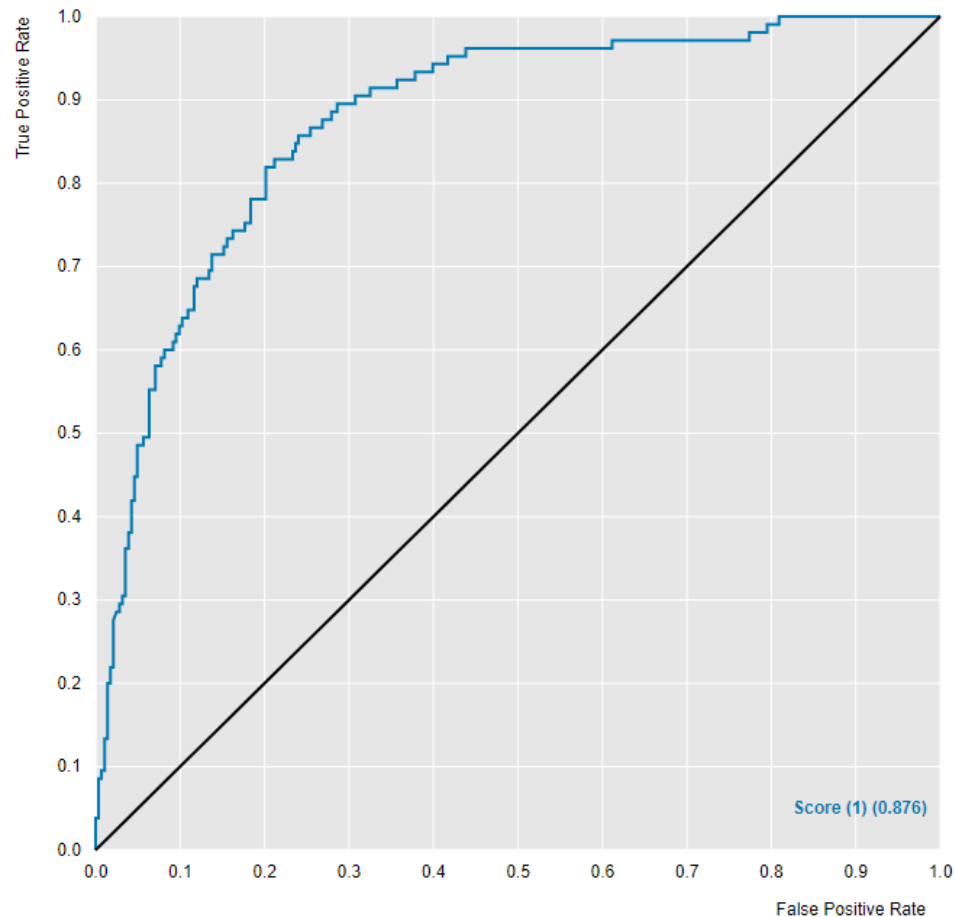

N=388

● Score (1) ● random

| Top 10% Mean IC50 | 280 nM |
|-------------------|--------|
|-------------------|--------|

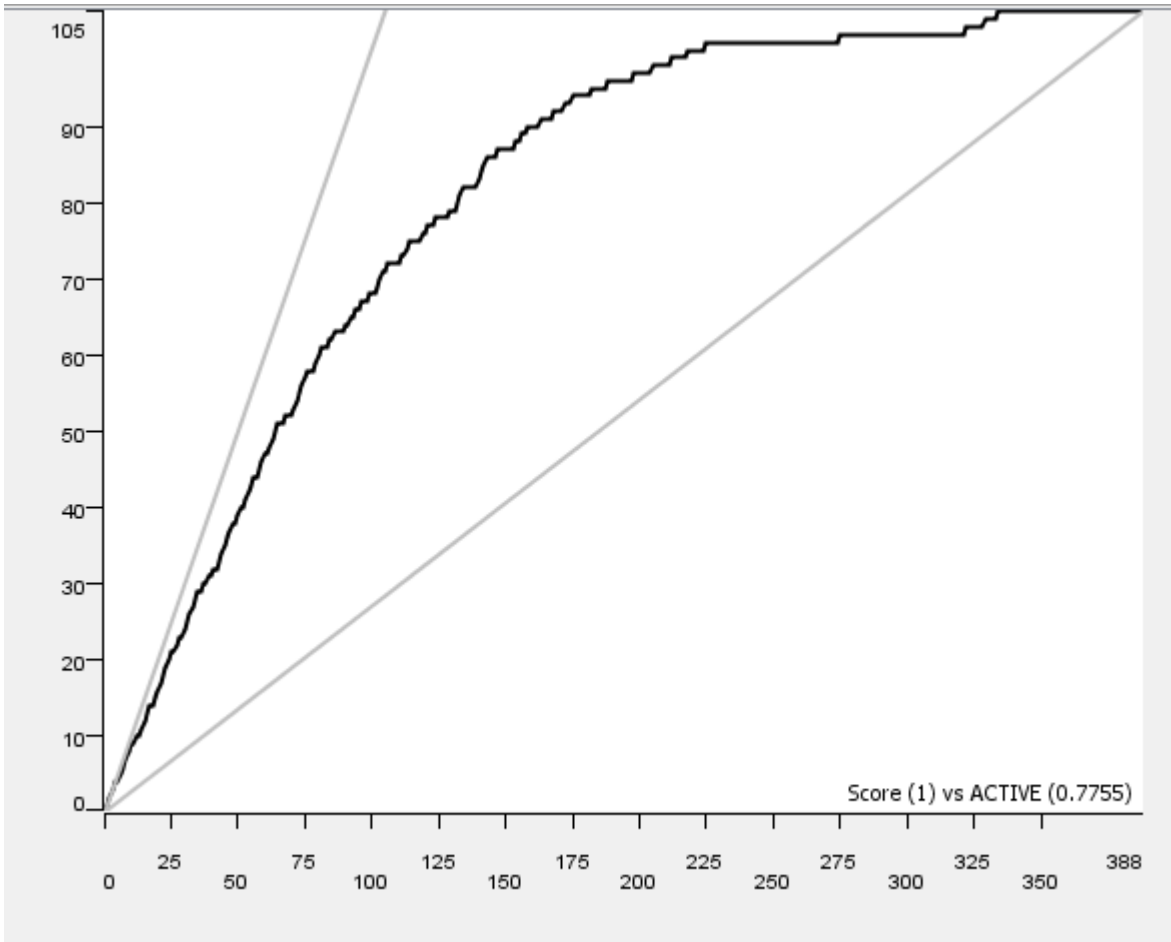

|          | Predicted Active | Predicted Inactive |
|----------|------------------|--------------------|
| Active   | 93               | 12                 |
| Inactive | 79               | 204                |

<20nM DefGood in PARP1, 45% error;  
Random seed = 121783

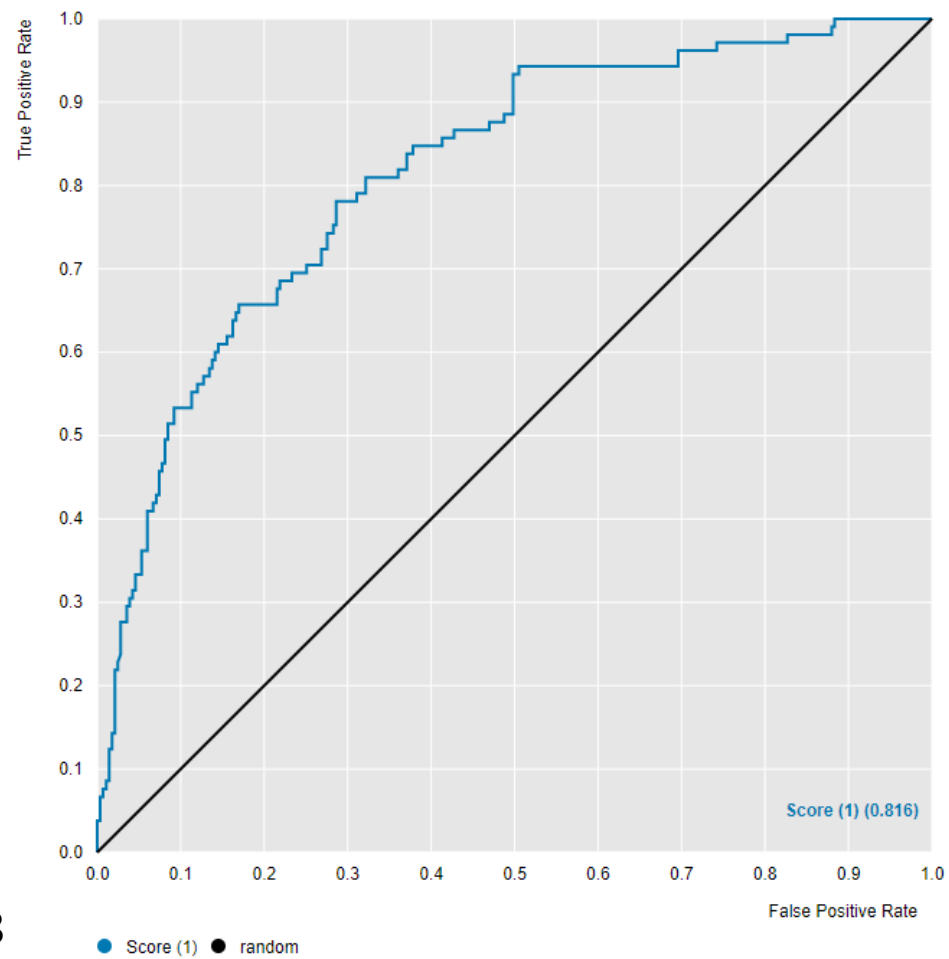

N=388

|                   |         |
|-------------------|---------|
| Top 10% Mean IC50 | 21.4 nM |
|-------------------|---------|

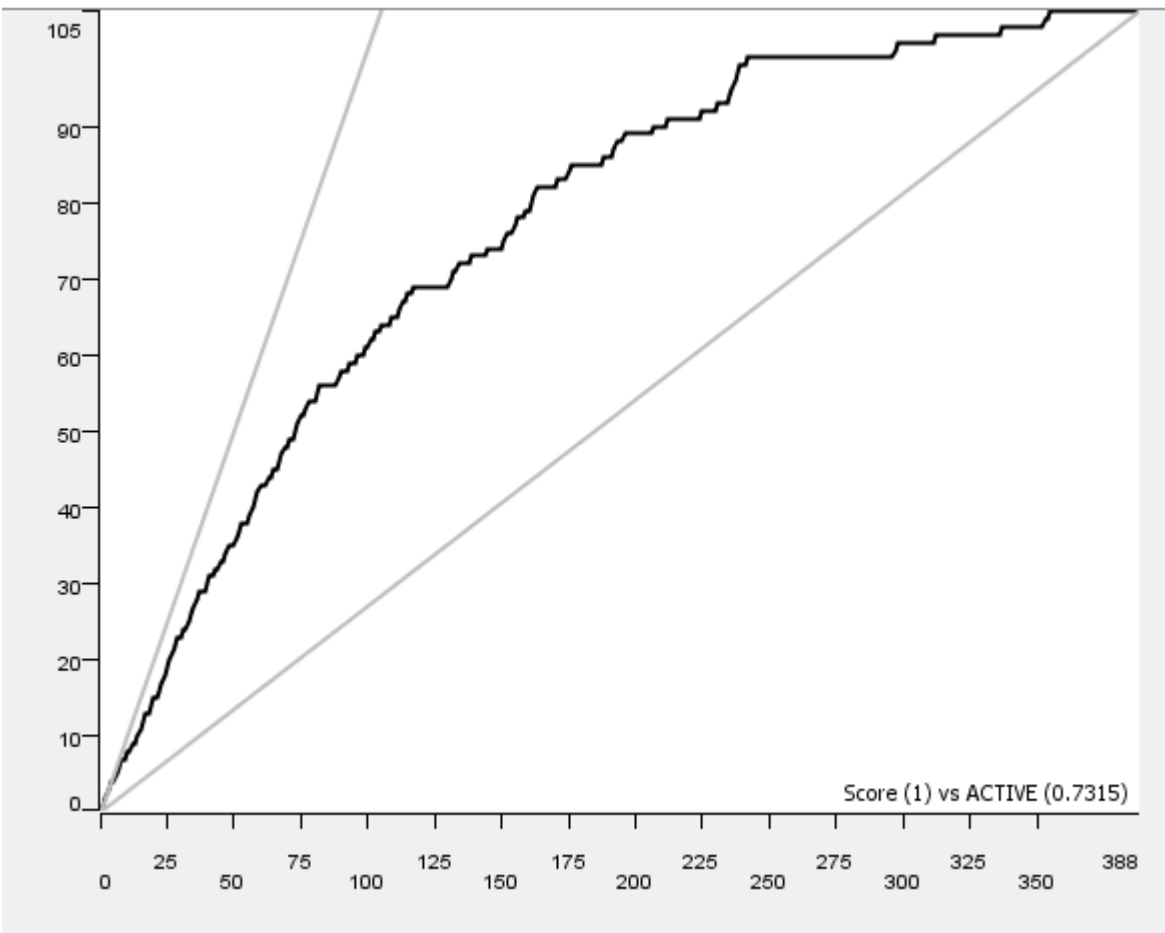

|          | Predicted Active | Predicted Inactive |
|----------|------------------|--------------------|
| Active   | 99               | 6                  |
| Inactive | 174              | 109                |



<20nM DefGood in PARP1, 50% error;  
Random seed = 121783

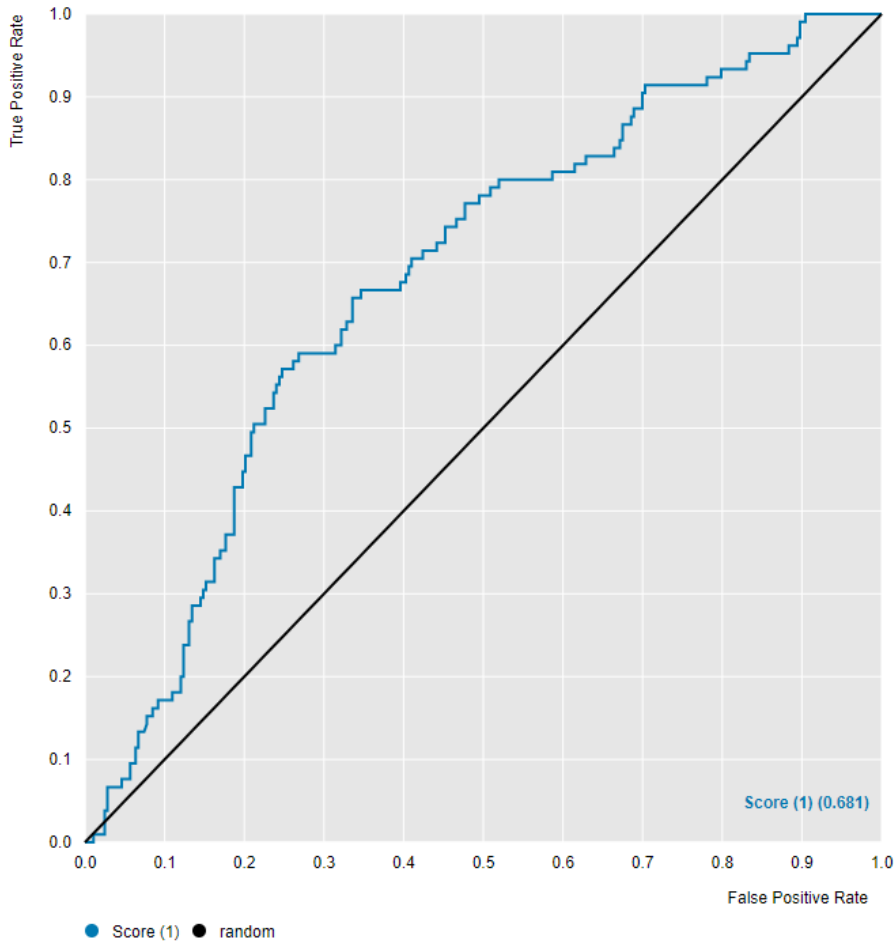

N=388

|                   |          |
|-------------------|----------|
| Top 10% Mean IC50 | 4,700 nM |
|-------------------|----------|

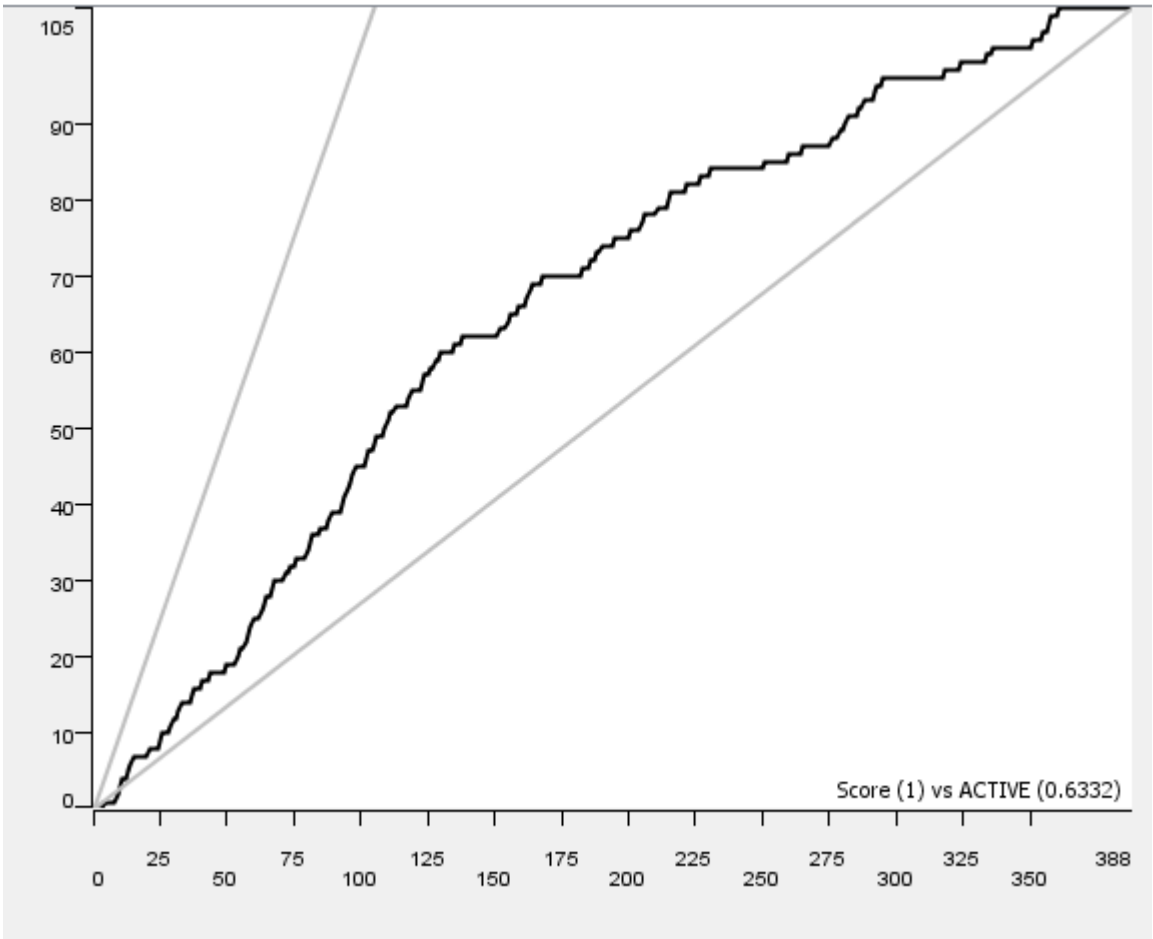

|          | Predicted Active | Predicted Inactive |
|----------|------------------|--------------------|
| Active   | 105              | 0                  |
| Inactive | 281              | 2                  |

# Conclusion - NBN

- An NBN could be generated for PARP1 kinase with a decision value of  $<20$  nM as defined as active. The predictivity of the algorithm could be preserved in three random train/test cycles. The point of failure was 5%, 45% and 50% error.
- The 5% failure point had one mistake ranked at the bottom of the top 10% which was  $>300,000$  nM.

# RF Error Tolerance- <20 nM DefGood in PARP1

- 0-50% absolute error

# RF- <20nM DefGood in PARP1, 10% error

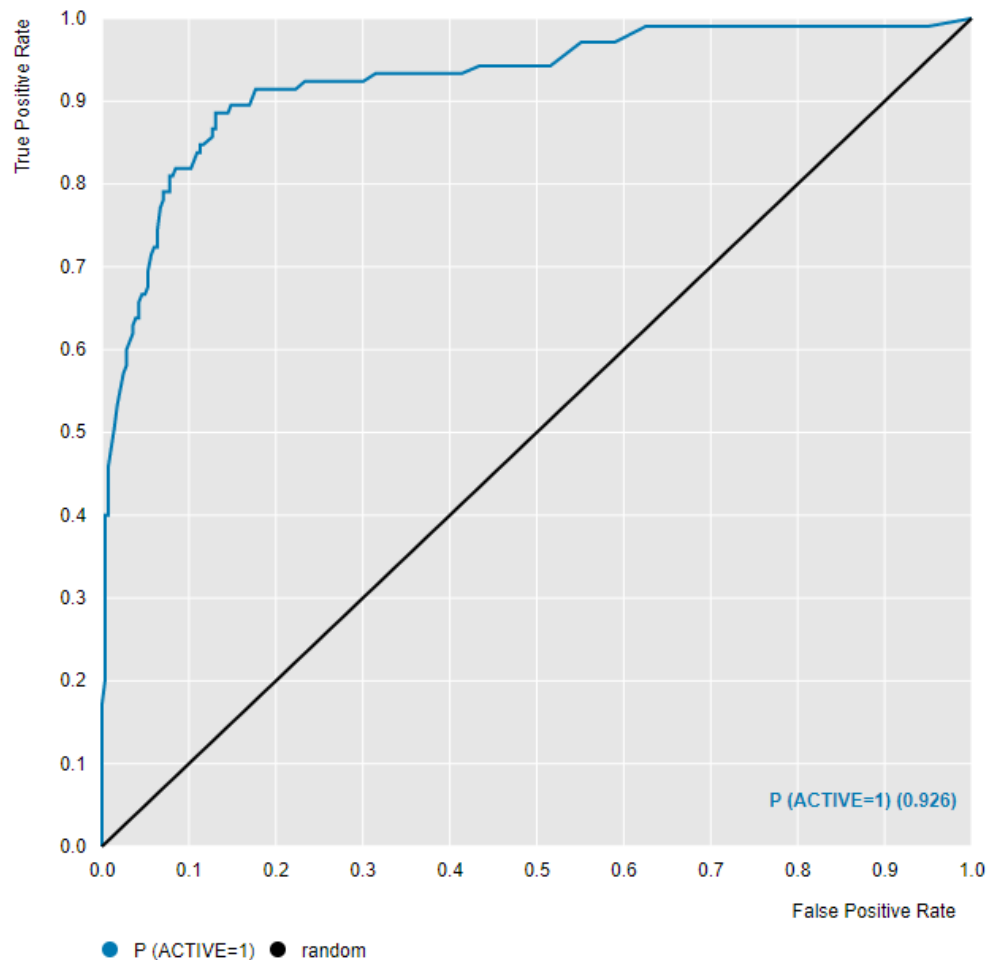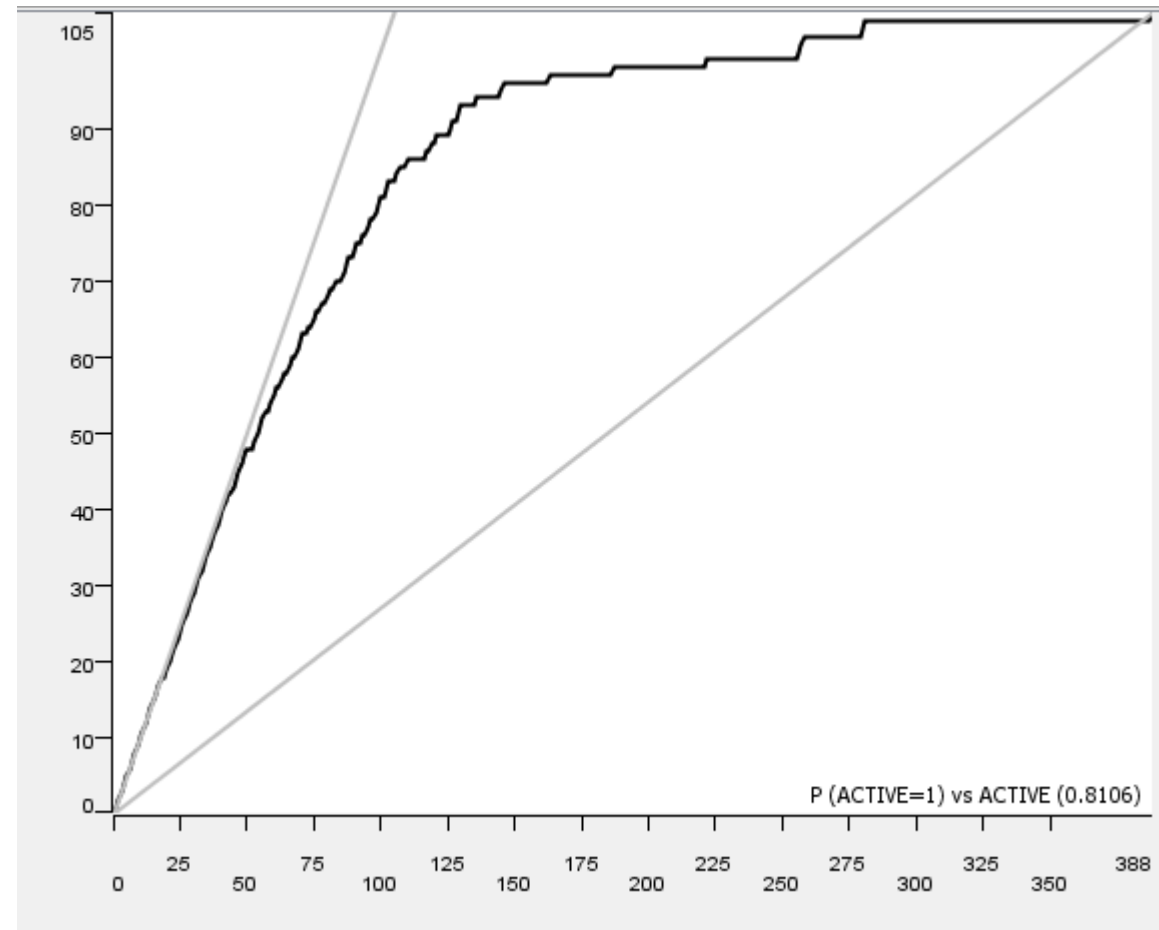

N=388

|                      |        |
|----------------------|--------|
| Top 10% Mean<br>IC50 | 7.3 nM |
|----------------------|--------|

|          | Predicted Active | Predicted Inactive |
|----------|------------------|--------------------|
| Active   | 86               | 19                 |
| Inactive | 26               | 257                |

# RF- <20nM DefGood in PARP1, 20% error

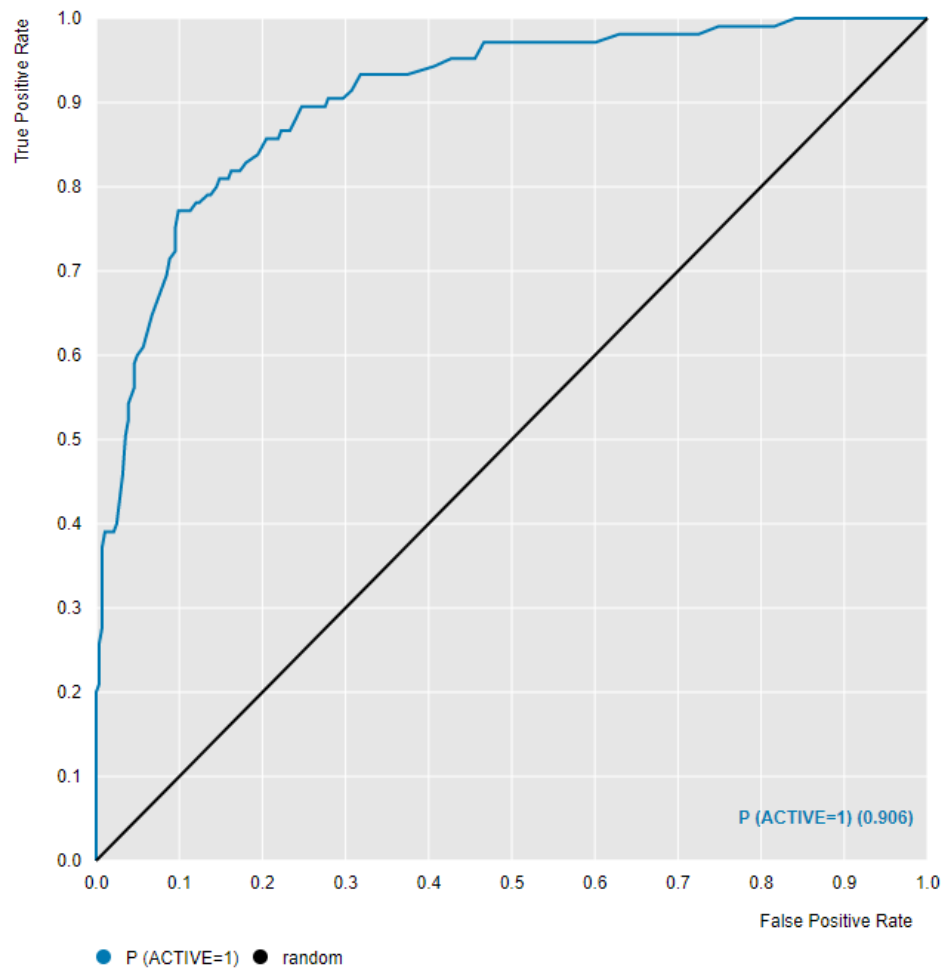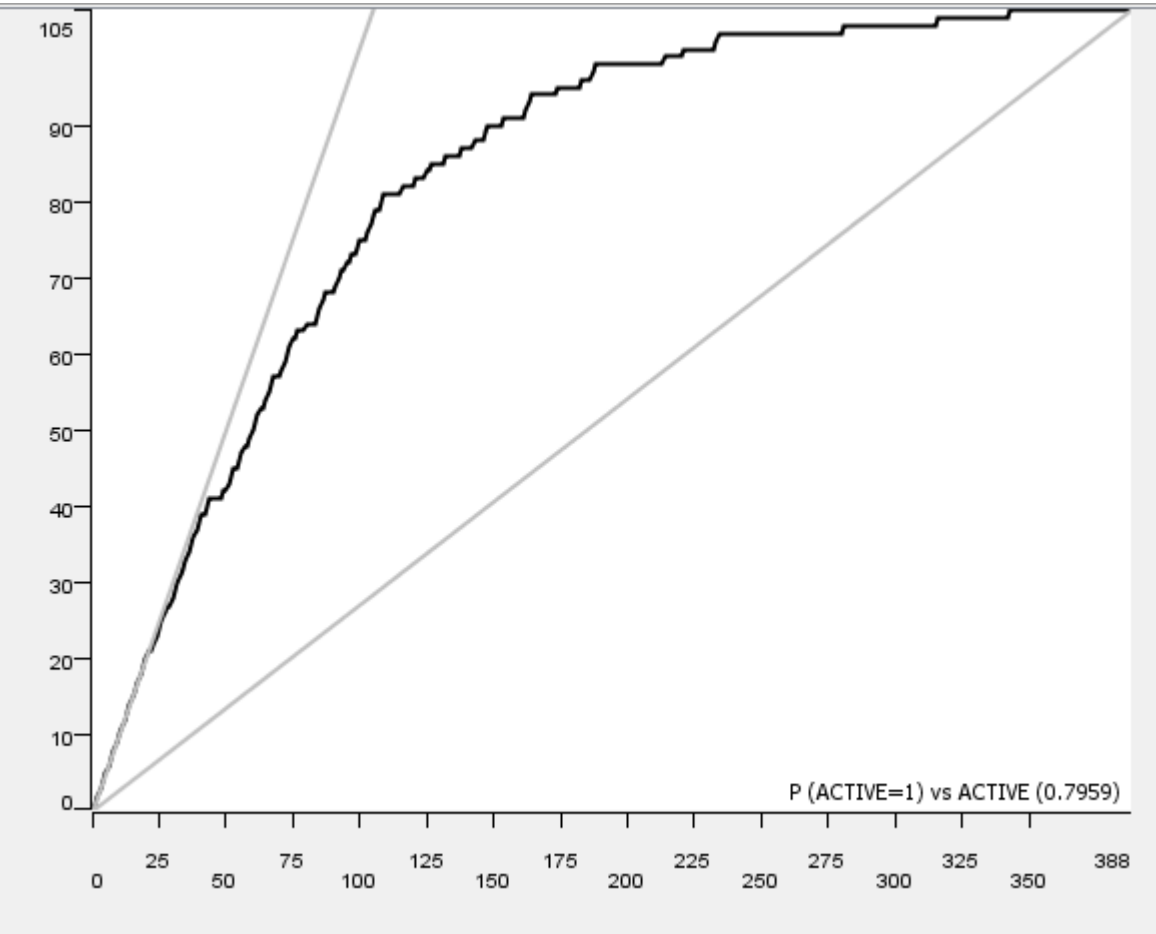

N=388

| Top 10% Mean IC50 | 18.1 nM |
|-------------------|---------|
|-------------------|---------|

|          | Predicted Active | Predicted Inactive |
|----------|------------------|--------------------|
| Active   | 83               | 22                 |
| Inactive | 38               | 245                |

# RF- <20nM DefGood in PARP1, 25% error

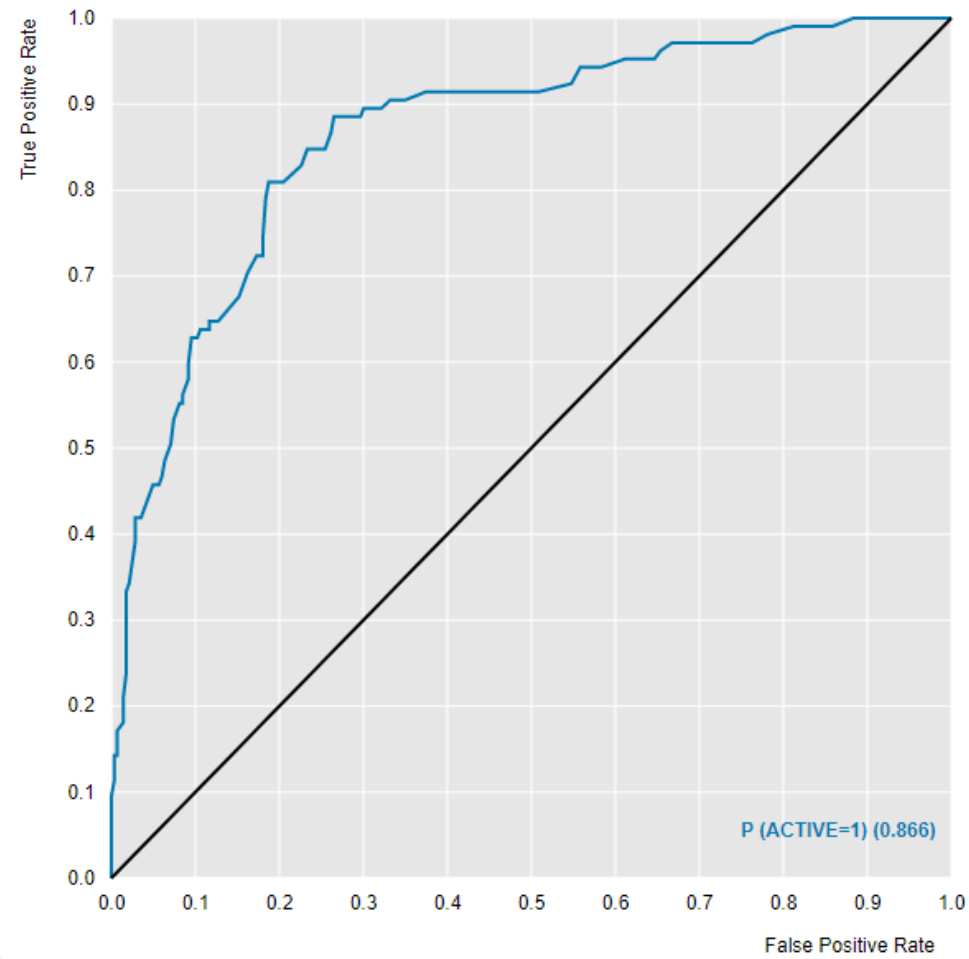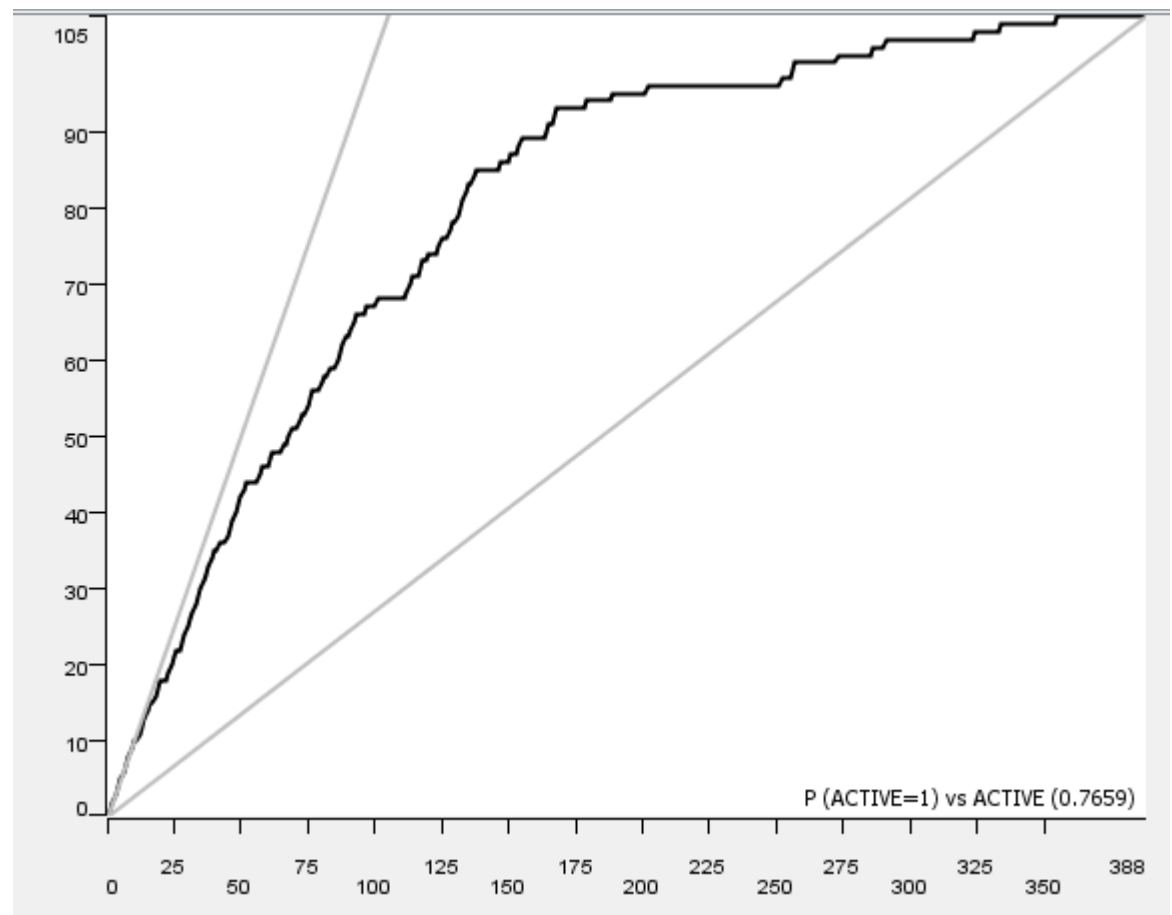

N=388

| Top 10% Mean IC50 | 282 nM |
|-------------------|--------|
|-------------------|--------|

|          | Predicted Active | Predicted Inactive |
|----------|------------------|--------------------|
| Active   | 74               | 31                 |
| Inactive | 46               | 237                |

# RF- <20nM DefGood in PARP1, 30% error

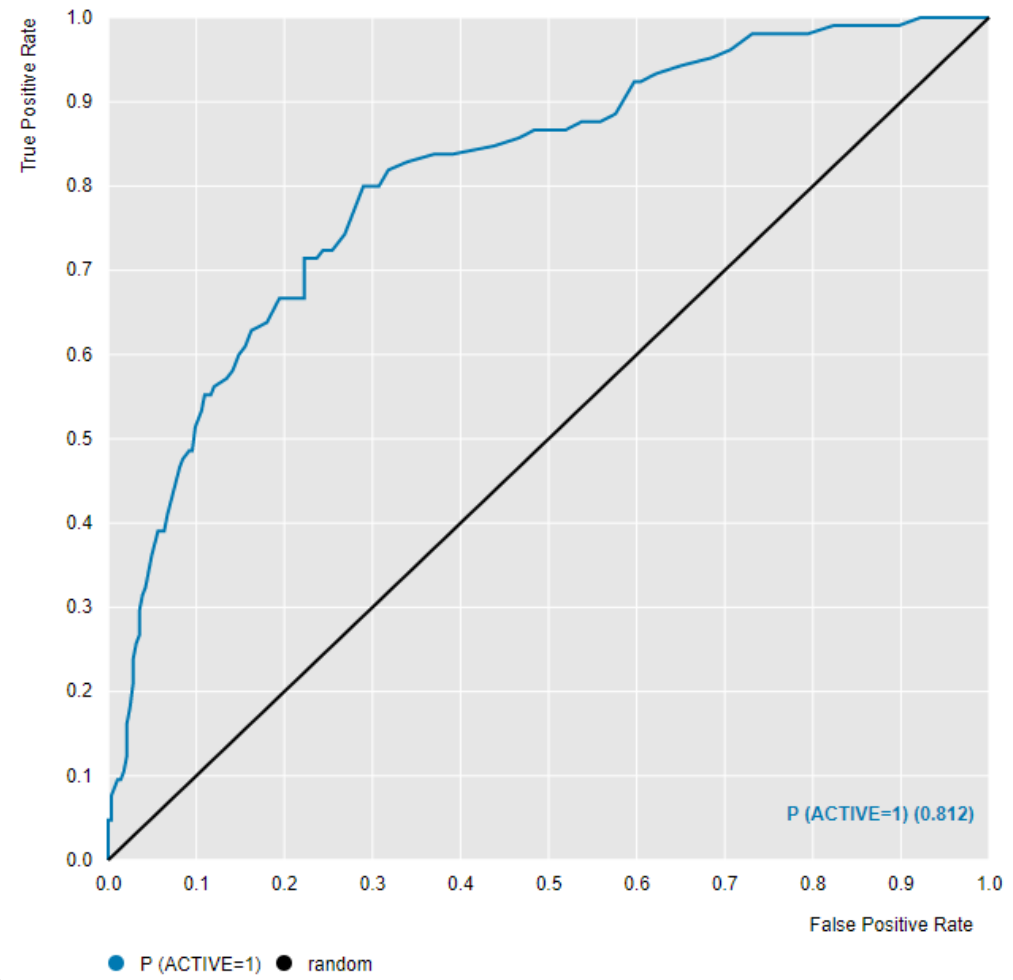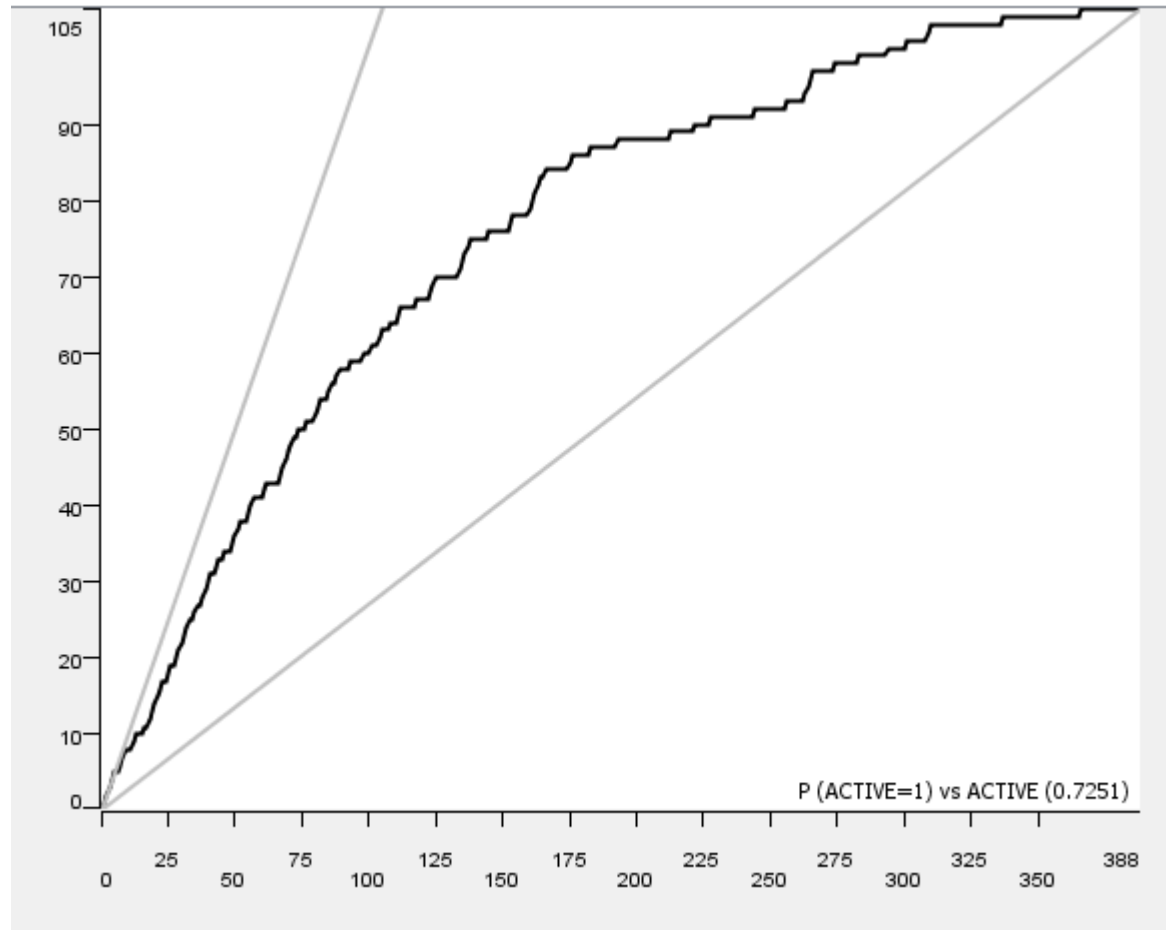

N=388

|                   |        |
|-------------------|--------|
| Top 10% Mean IC50 | 546 nM |
|-------------------|--------|

|          | Predicted Active | Predicted Inactive |
|----------|------------------|--------------------|
| Active   | 70               | 35                 |
| Inactive | 55               | 228                |

# RF- <20nM DefGood in PARP1, 35% error

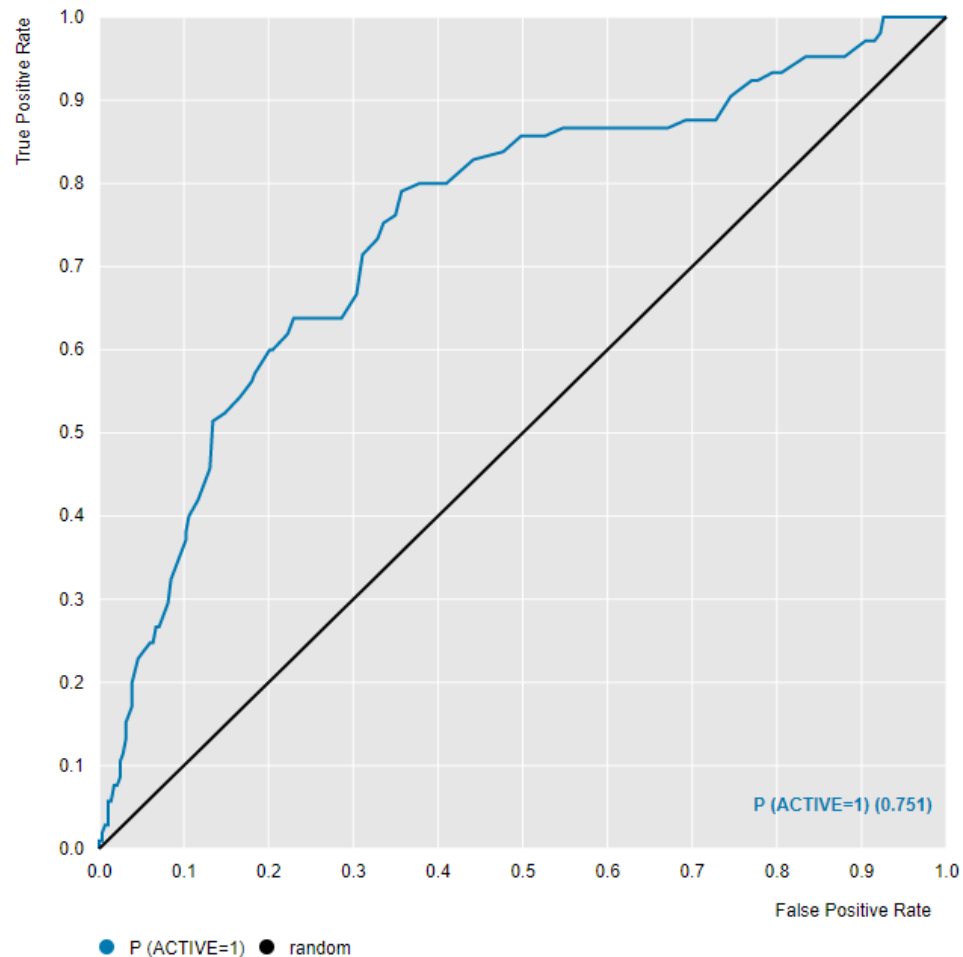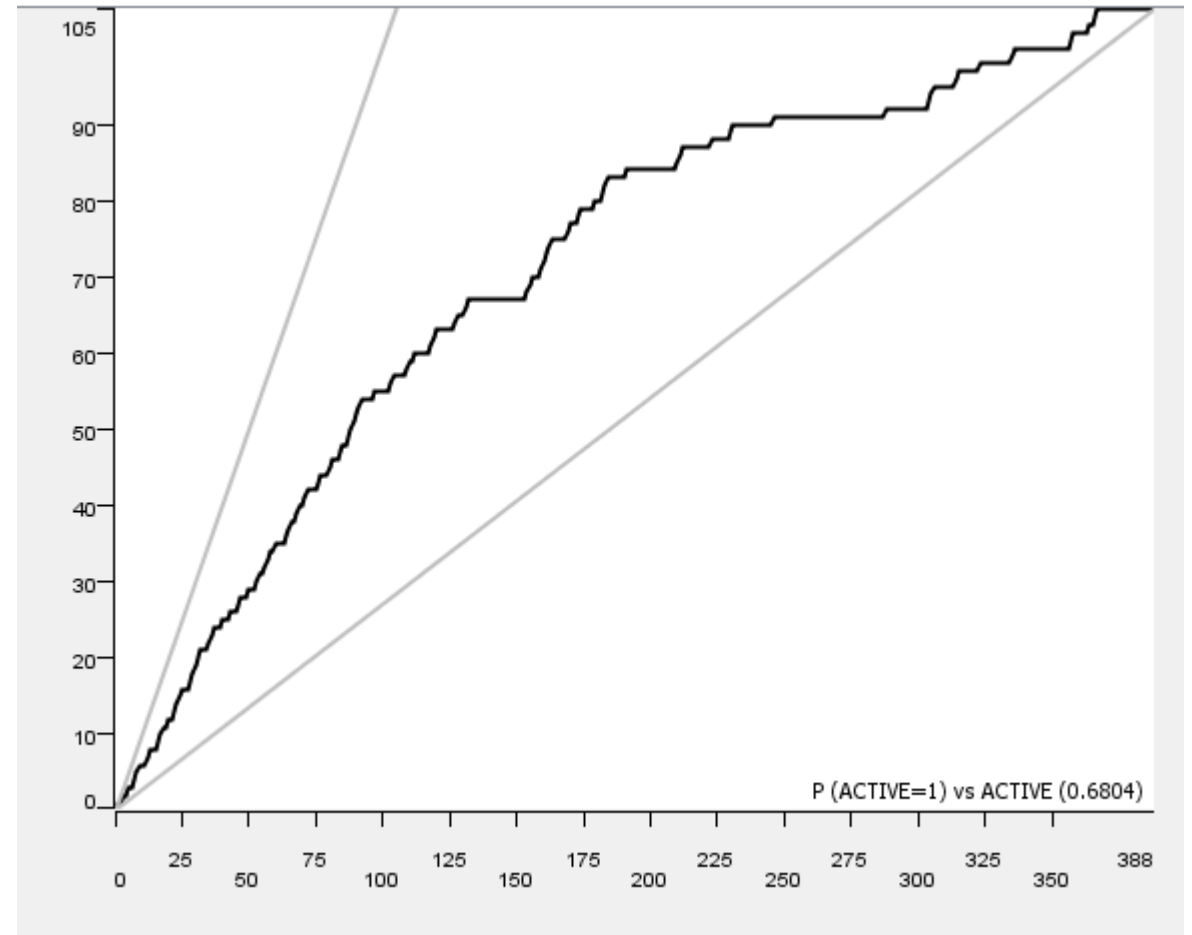

N=388

Top 10% Mean  
IC50

631 nM

|          | Predicted Active | Predicted Inactive |
|----------|------------------|--------------------|
| Active   | 63               | 42                 |
| Inactive | 58               | 225                |



# RF- <20nM DefGood in PARP1, 40% error

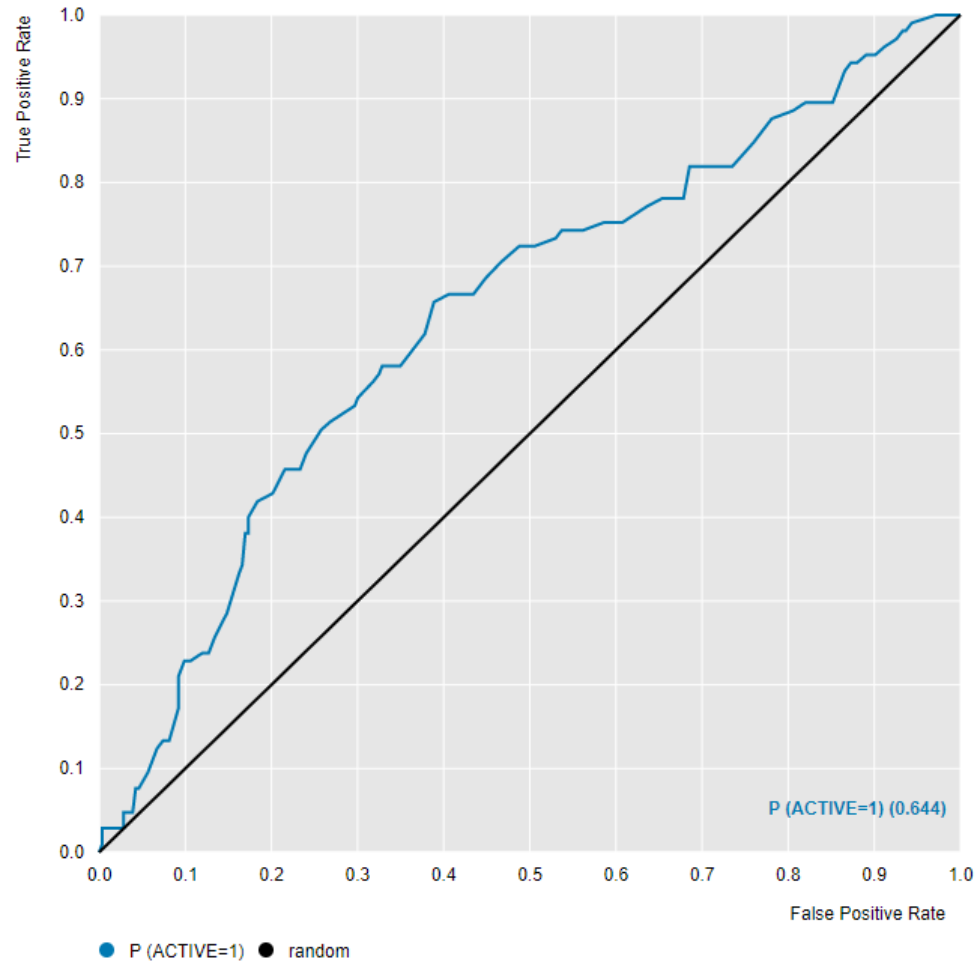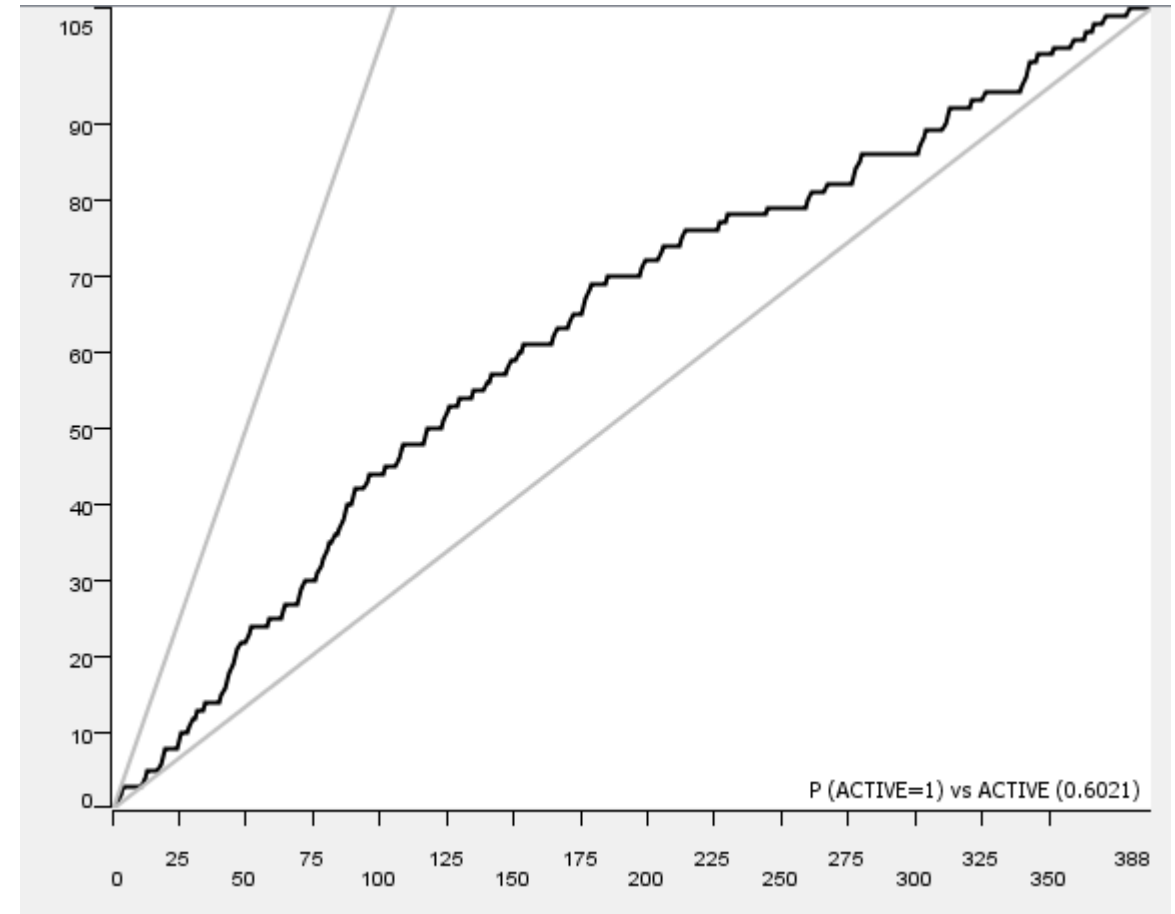

N=388

Top 10% Mean  
IC50

3,600 nM

|          | Predicted Active | Predicted Inactive |
|----------|------------------|--------------------|
| Active   | 56               | 49                 |
| Inactive | 84               | 199                |

<20nM DefGood in PARP1, 10% error;  
Random seed = 429

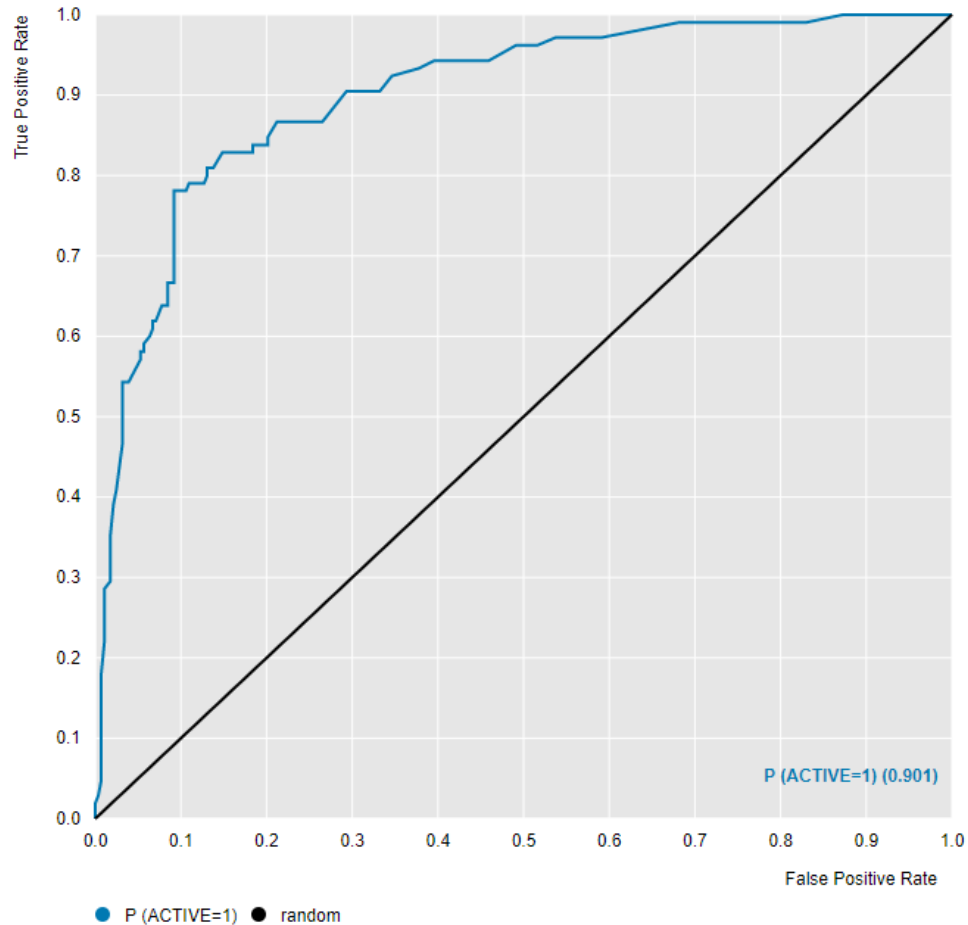

N=388

| Top 10% Mean<br>IC50 | 12.1 nM |
|----------------------|---------|
|----------------------|---------|

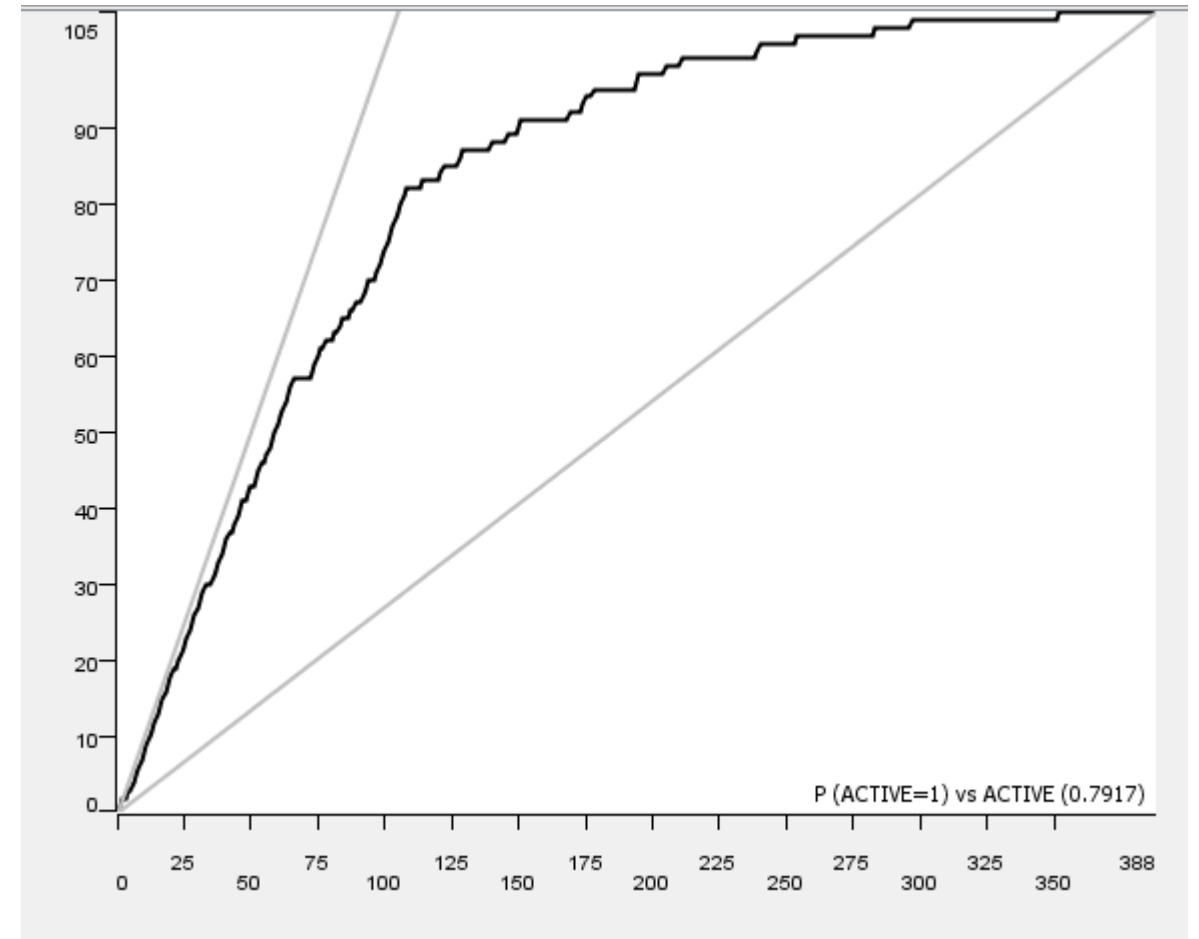

|          | Predicted Active | Predicted Inactive |
|----------|------------------|--------------------|
| Active   | 75               | 30                 |
| Inactive | 26               | 257                |

<20nM DefGood in PARP1, 20% error;  
Random seed = 429

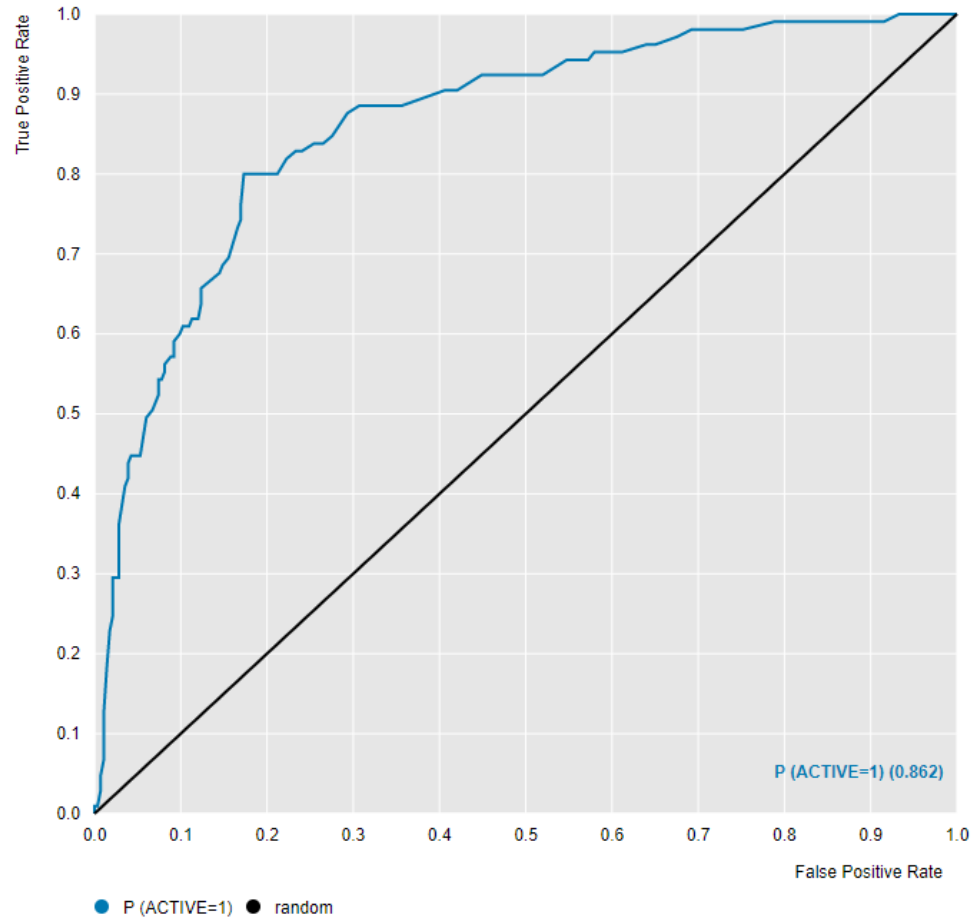

N=388

| Top 10% Mean<br>IC50 | 109 nM |
|----------------------|--------|
|----------------------|--------|

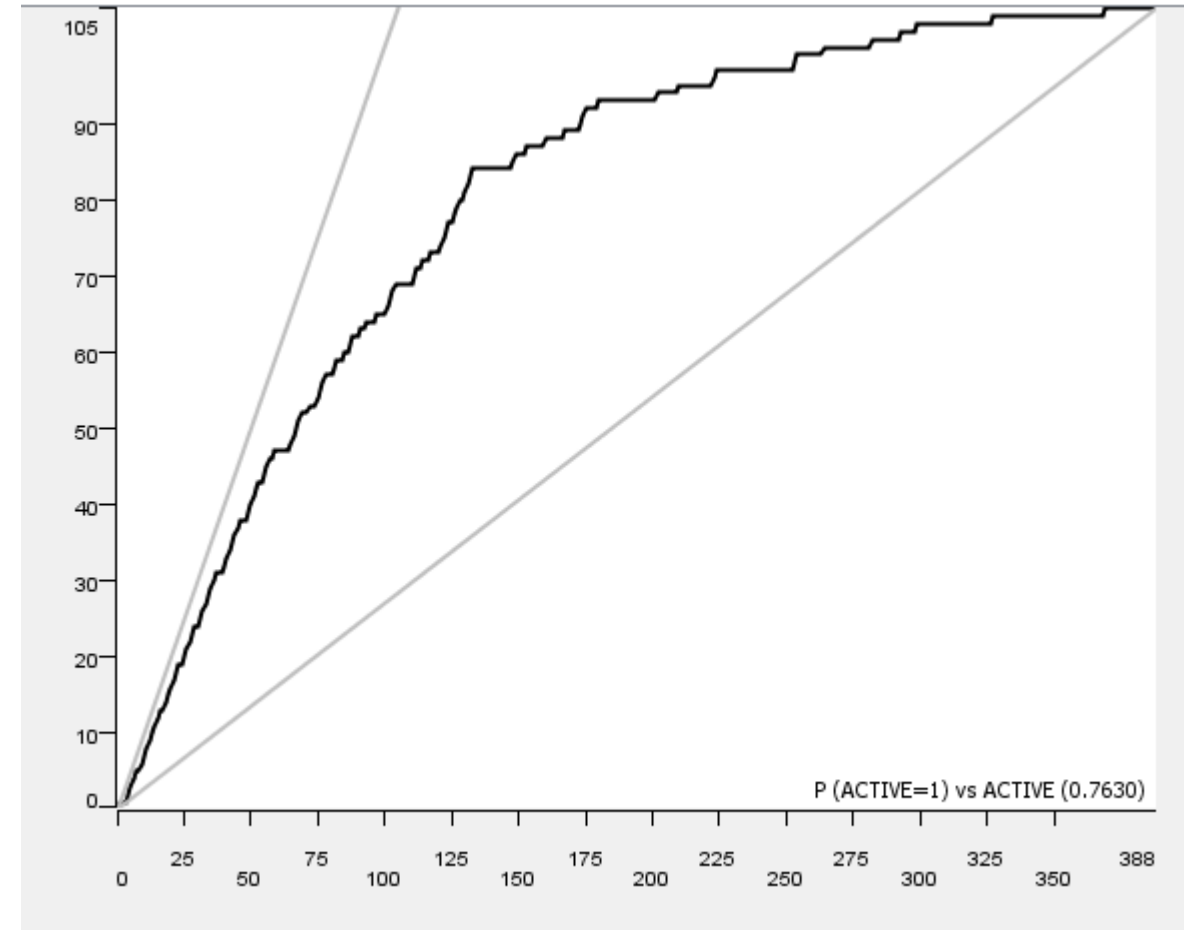

|          | Predicted Active | Predicted Inactive |
|----------|------------------|--------------------|
| Active   | 69               | 36                 |
| Inactive | 35               | 248                |

<20nM DefGood in PARP1, 25% error;  
Random seed = 429

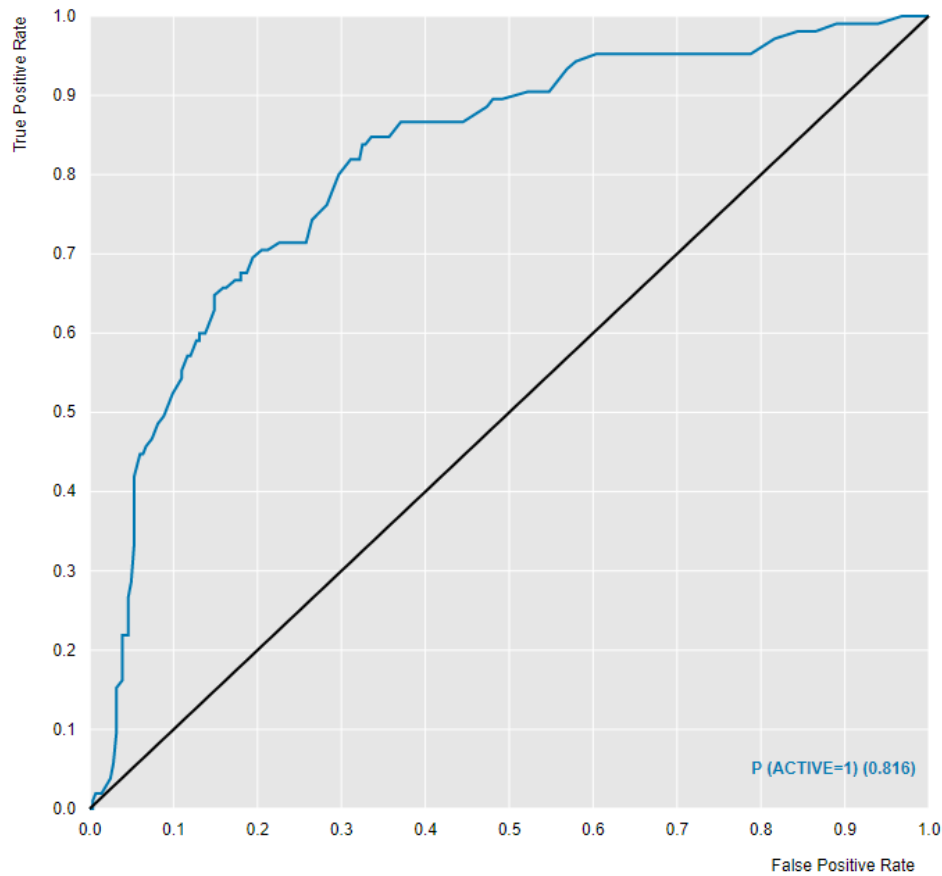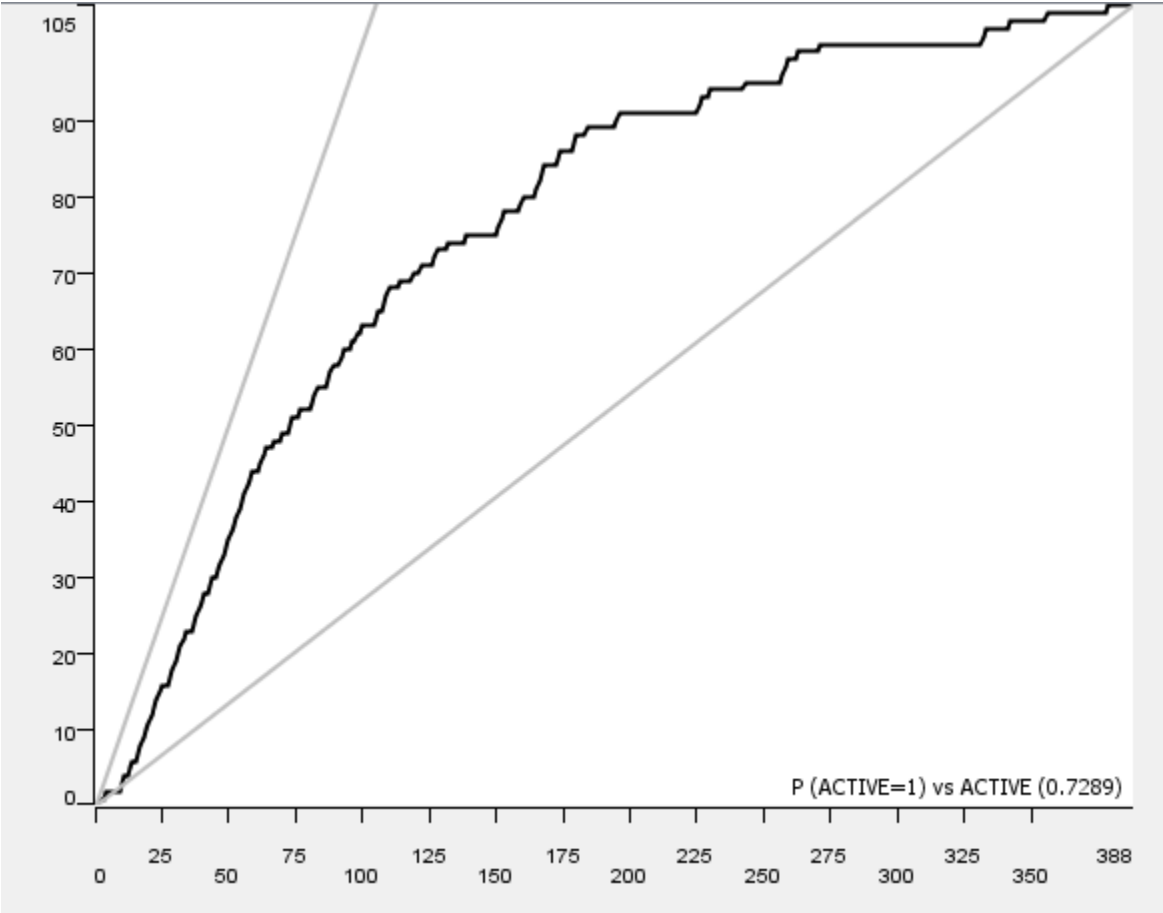

N=388

|                      |          |
|----------------------|----------|
| Top 10% Mean<br>IC50 | 2,700 nM |
|----------------------|----------|

|          | Predicted Active | Predicted Inactive |
|----------|------------------|--------------------|
| Active   | 70               | 35                 |
| Inactive | 51               | 232                |

<20nM DefGood in PARP1, 30% error;  
Random seed = 429

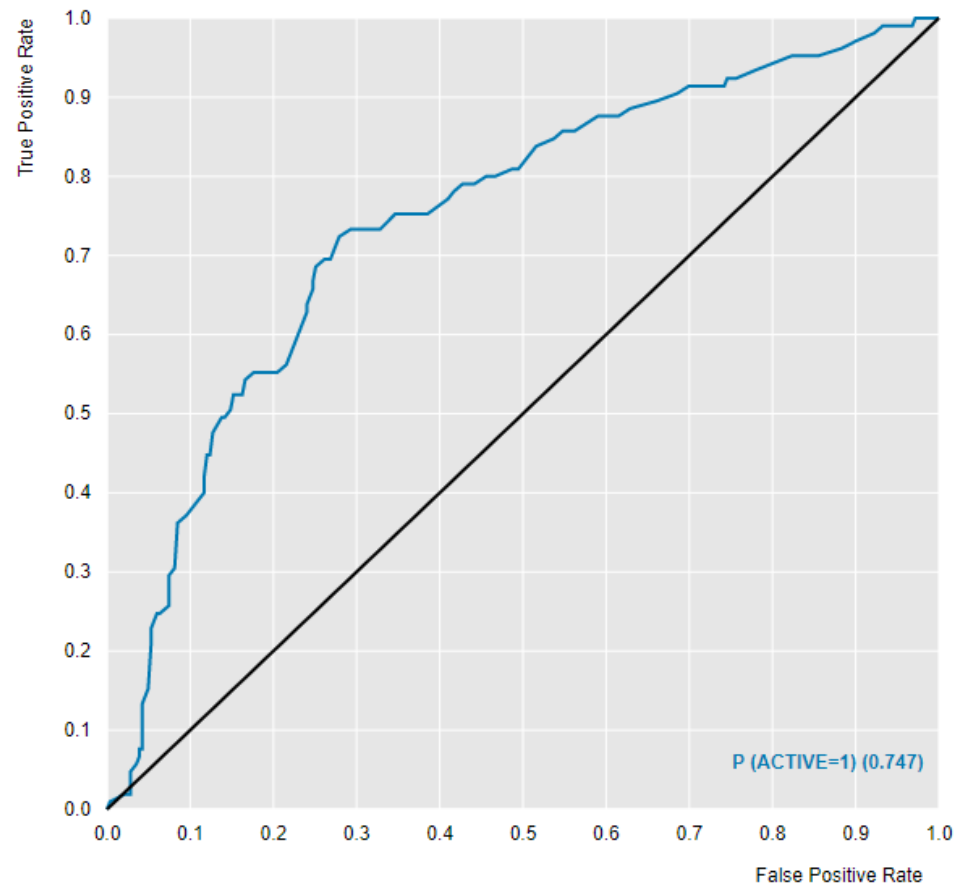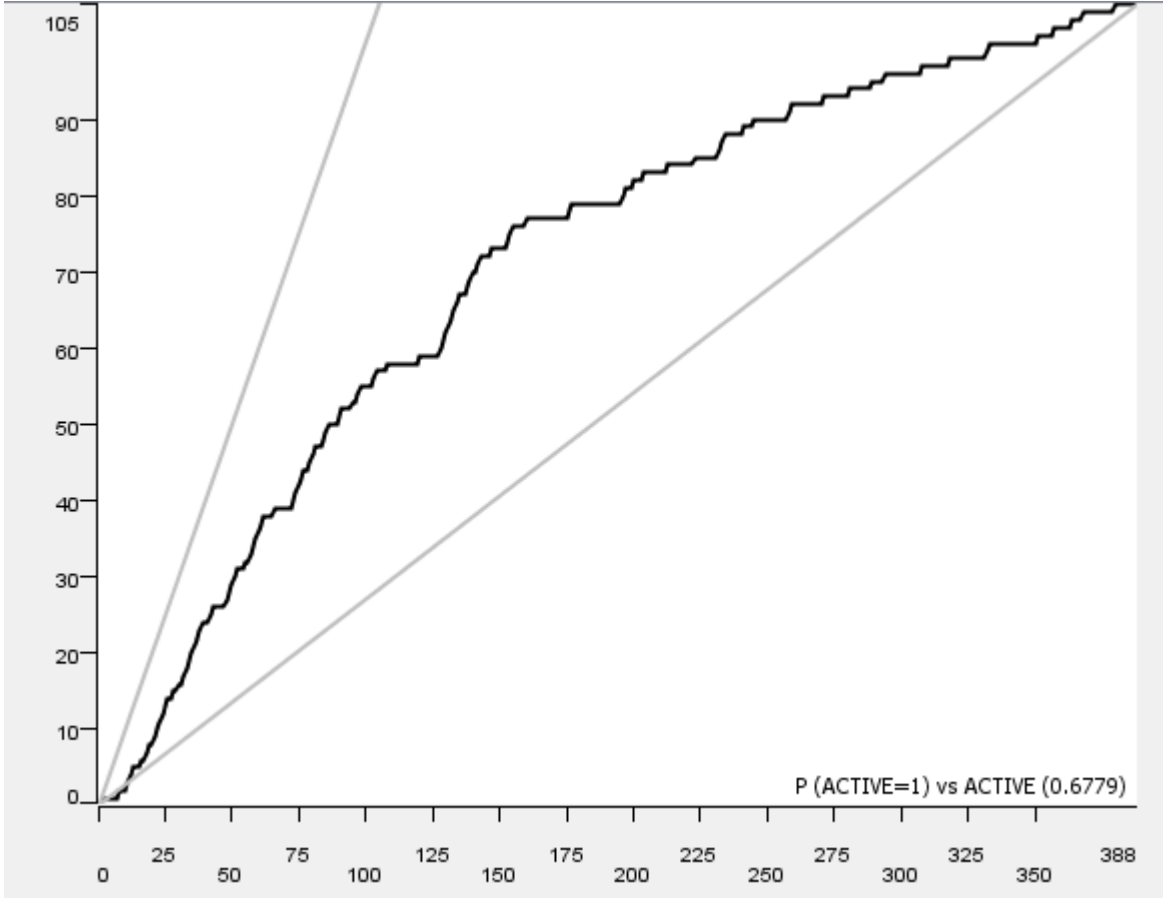

N=388

● P (ACTIVE=1) ● random

| Top 10% Mean IC50 | 3,200 nM |
|-------------------|----------|
|-------------------|----------|

|          | Predicted Active | Predicted Inactive |
|----------|------------------|--------------------|
| Active   | 66               | 39                 |
| Inactive | 68               | 215                |

<20nM DefGood in PARP1, 10% error;  
Random seed = 121783

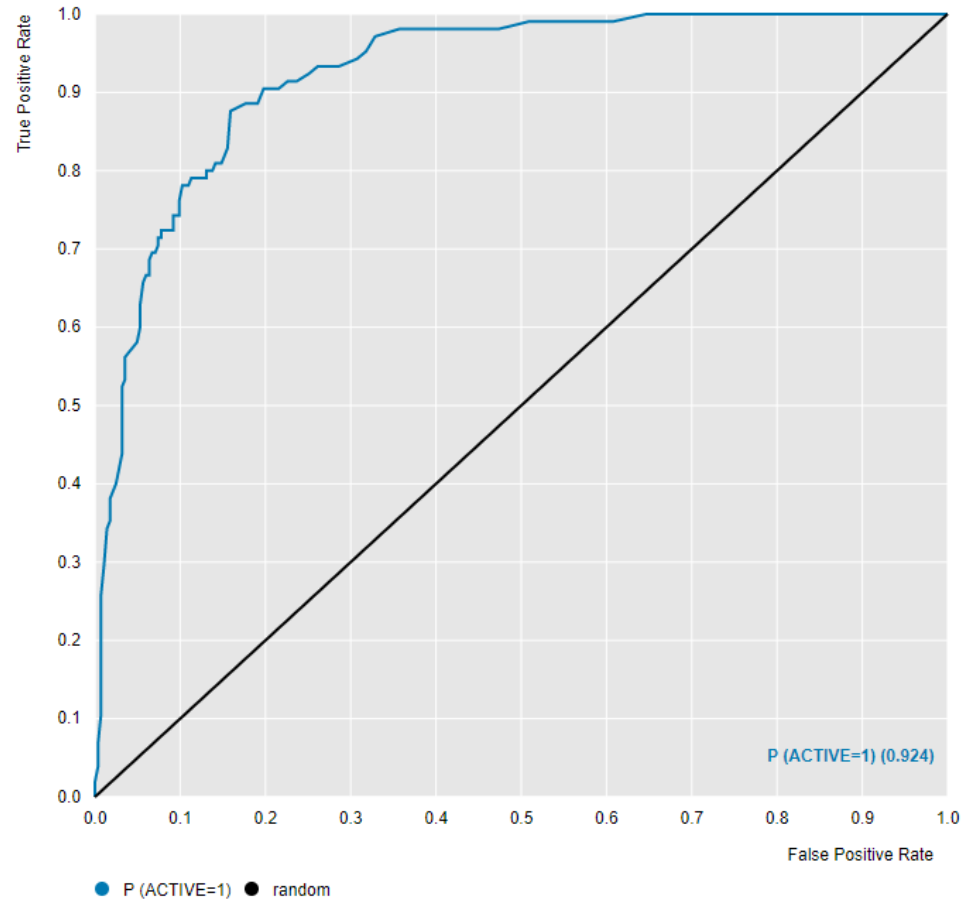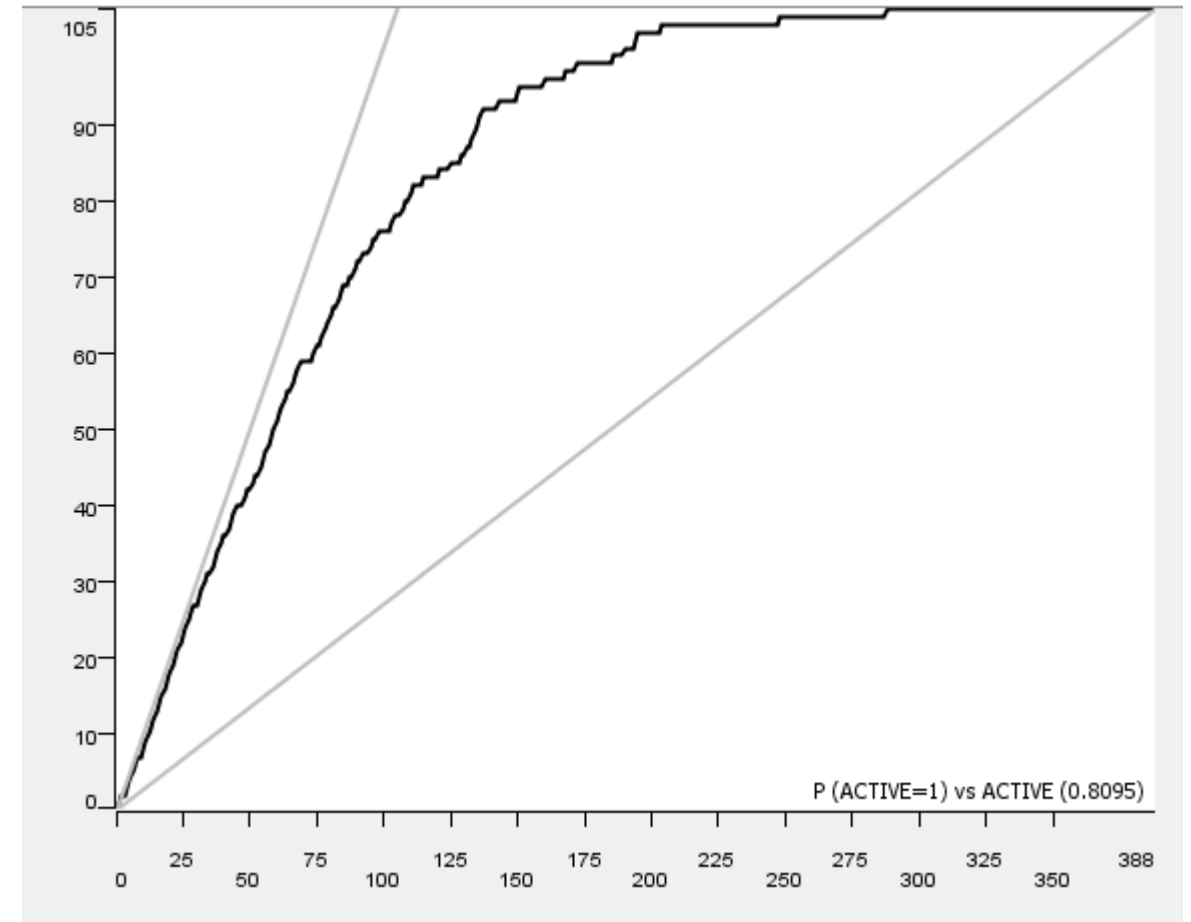

N=388

| Top 10% Mean<br>IC50 | 11.9 nM |
|----------------------|---------|
|----------------------|---------|

|          | Predicted Active | Predicted Inactive |
|----------|------------------|--------------------|
| Active   | 78               | 27                 |
| Inactive | 27               | 256                |

<20nM DefGood in PARP1, 20% error;  
Random seed = 121783

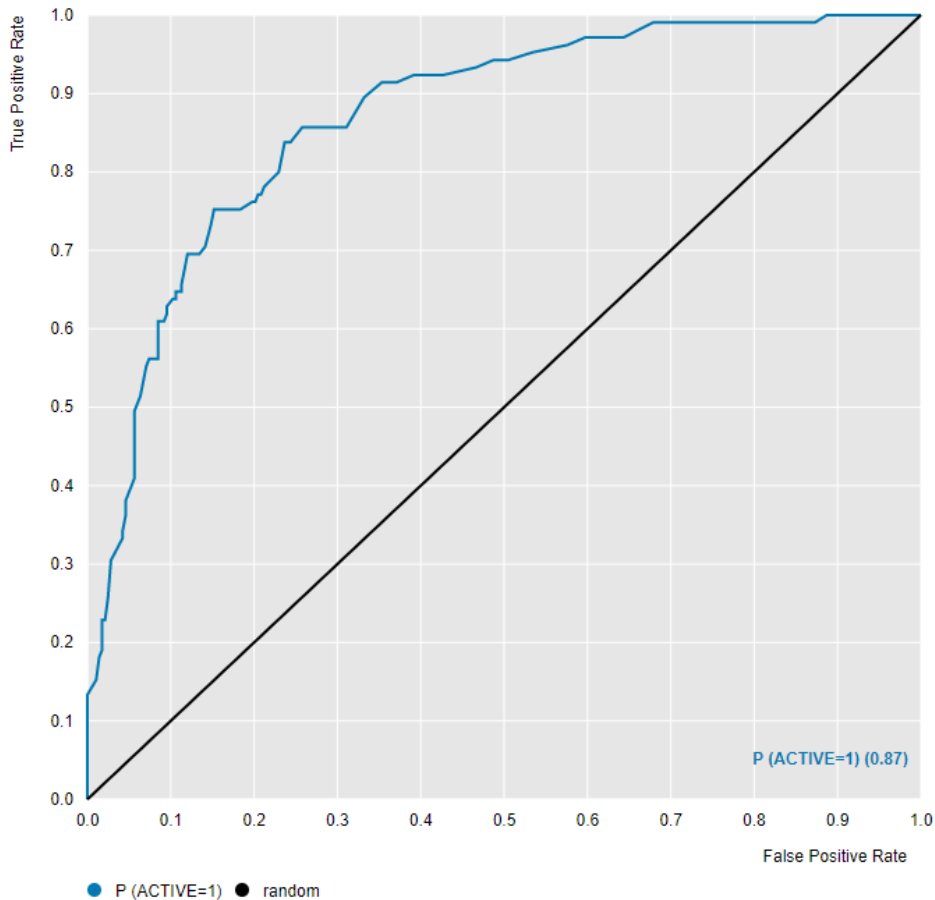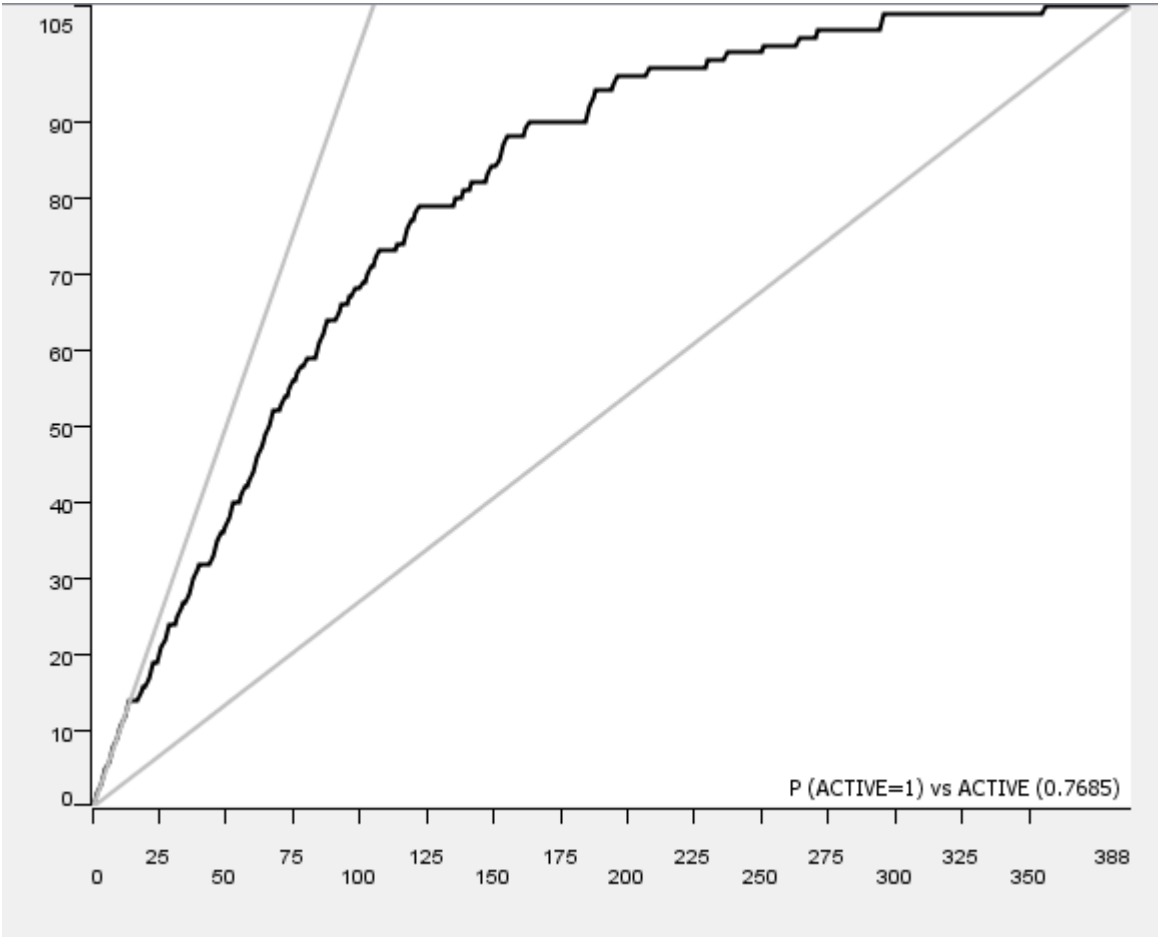

N=388

| Top 10% Mean IC50 | 16.9 nM |
|-------------------|---------|
|-------------------|---------|

|          | Predicted Active | Predicted Inactive |
|----------|------------------|--------------------|
| Active   | 73               | 32                 |
| Inactive | 35               | 248                |

<20nM DefGood in PARP1, 25% error;  
Random seed = 121783

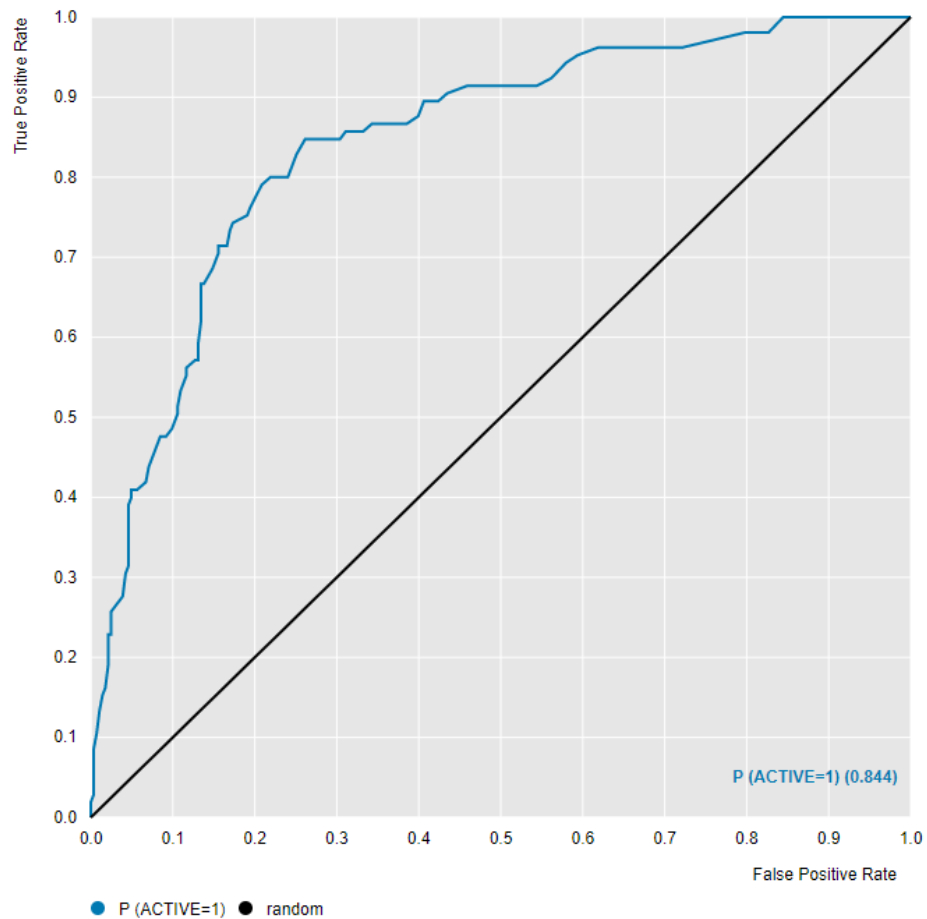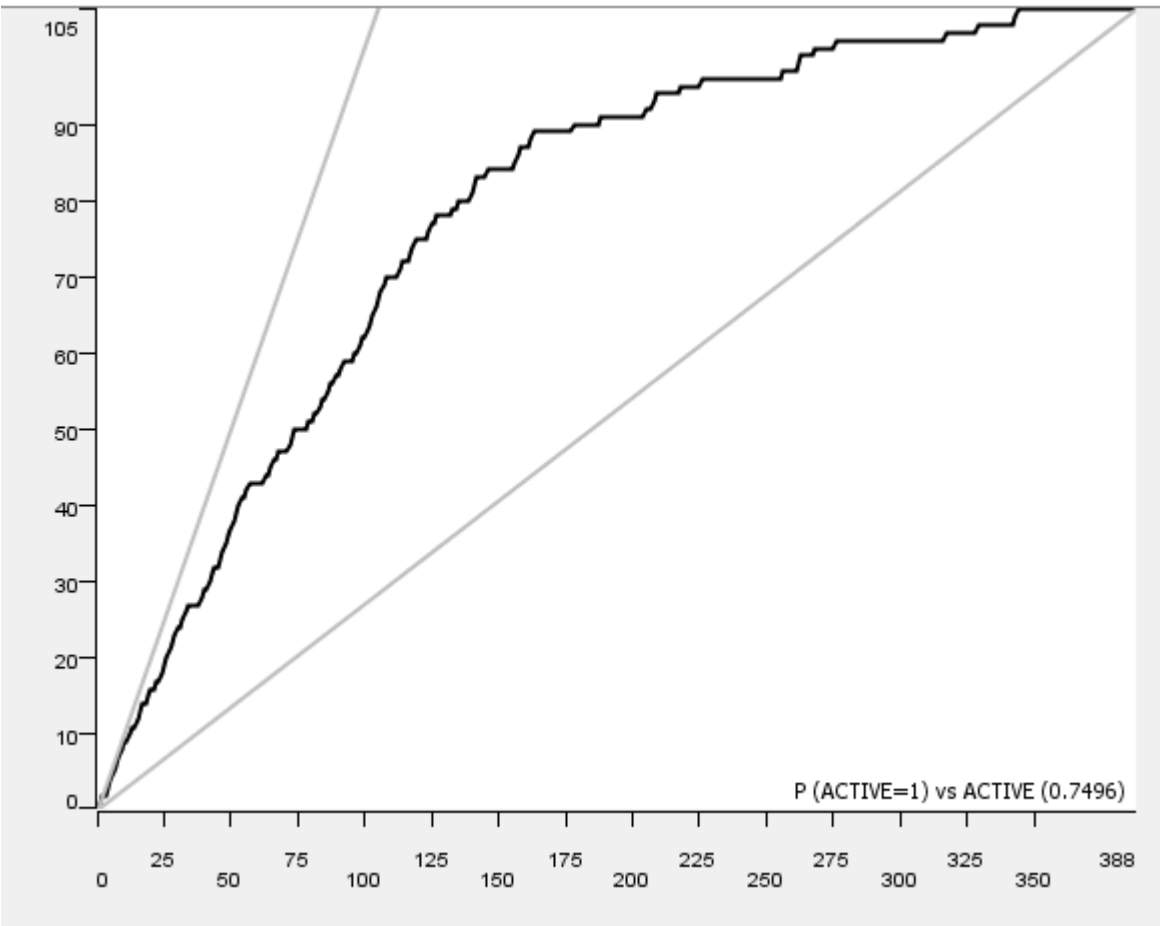

N=388

| Top 10% Mean IC50 | 24.3 nM |
|-------------------|---------|
|-------------------|---------|

|          | Predicted Active | Predicted Inactive |
|----------|------------------|--------------------|
| Active   | 72               | 33                 |
| Inactive | 42               | 241                |



<20nM DefGood in PARP1, 30% error;  
Random seed = 121783

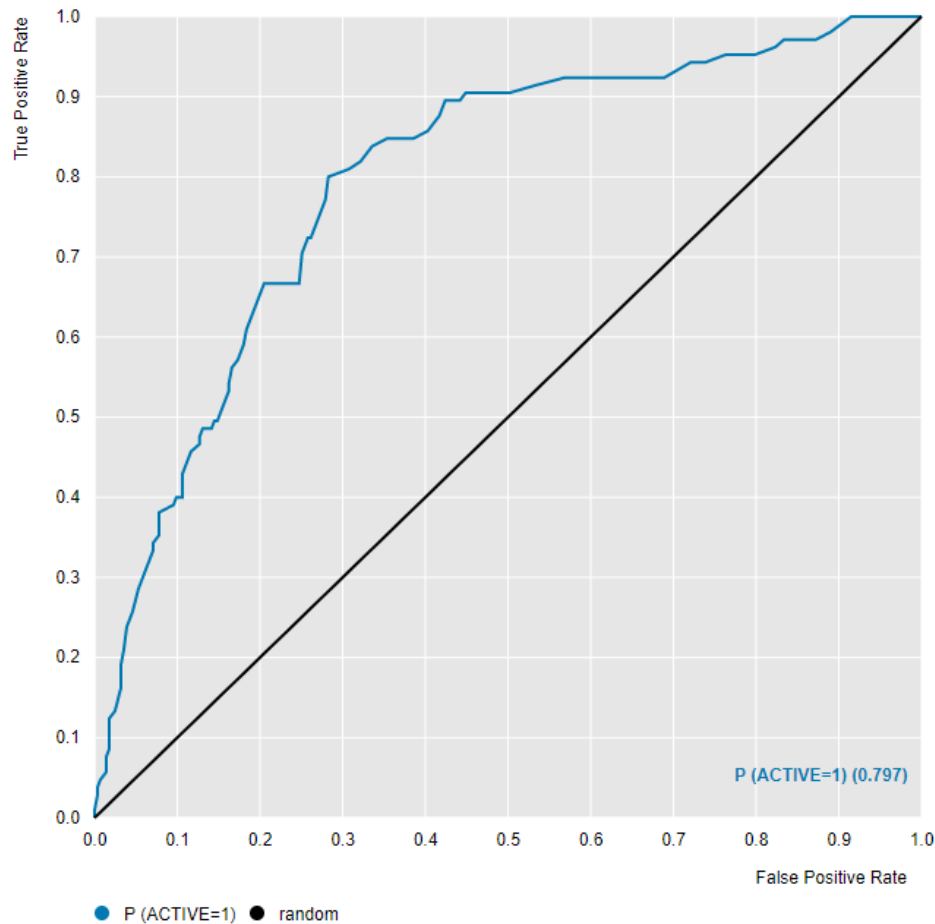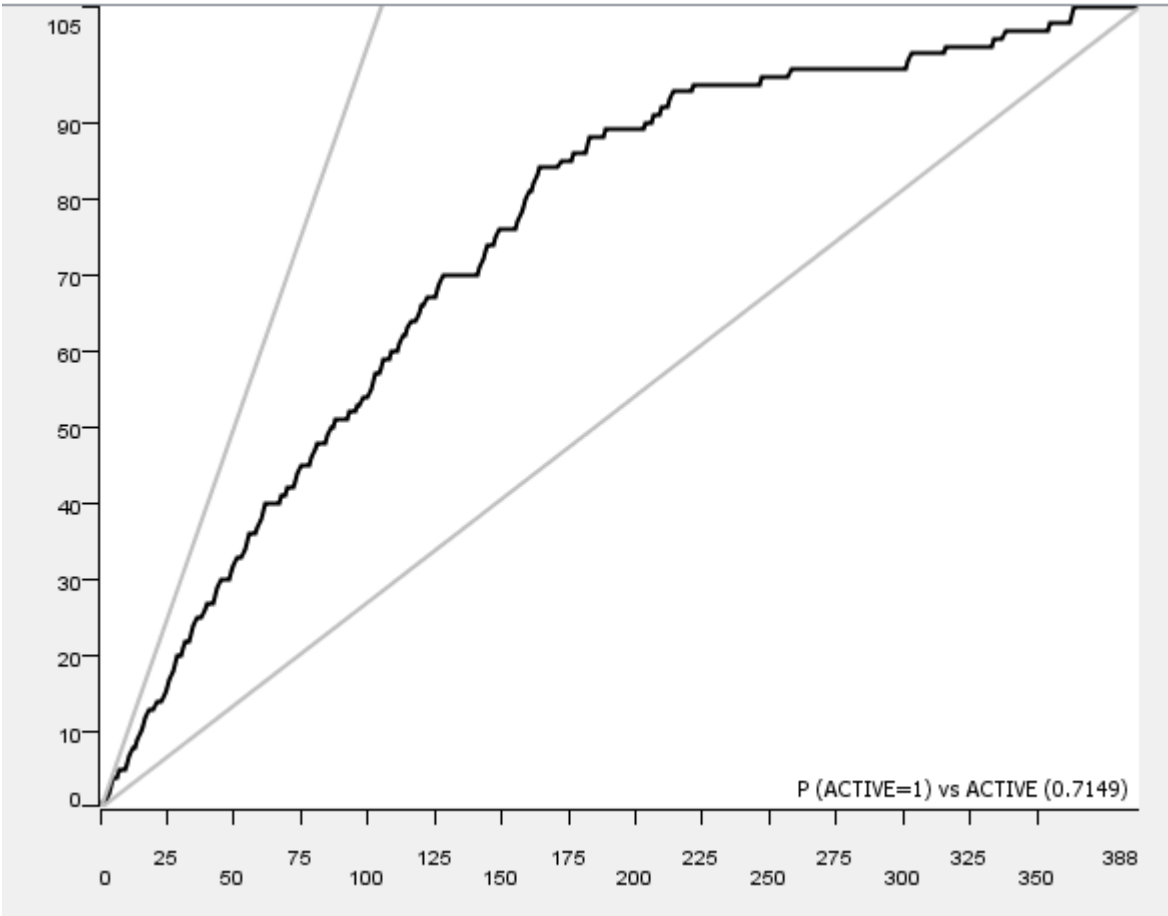

N=388

|                      |         |
|----------------------|---------|
| Top 10% Mean<br>IC50 | 32.5 nM |
|----------------------|---------|

|          | Predicted Active | Predicted Inactive |
|----------|------------------|--------------------|
| Active   | 70               | 35                 |
| Inactive | 58               | 225                |

<20nM DefGood in PARP1, 35% error;  
Random seed = 121783

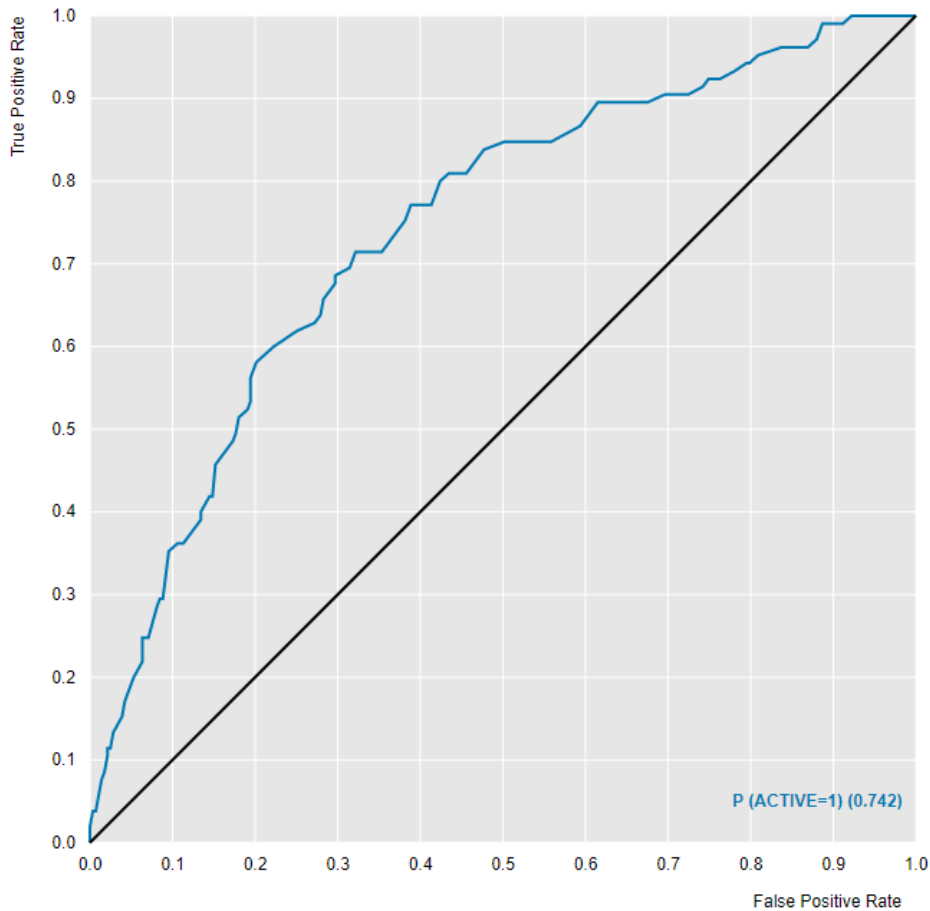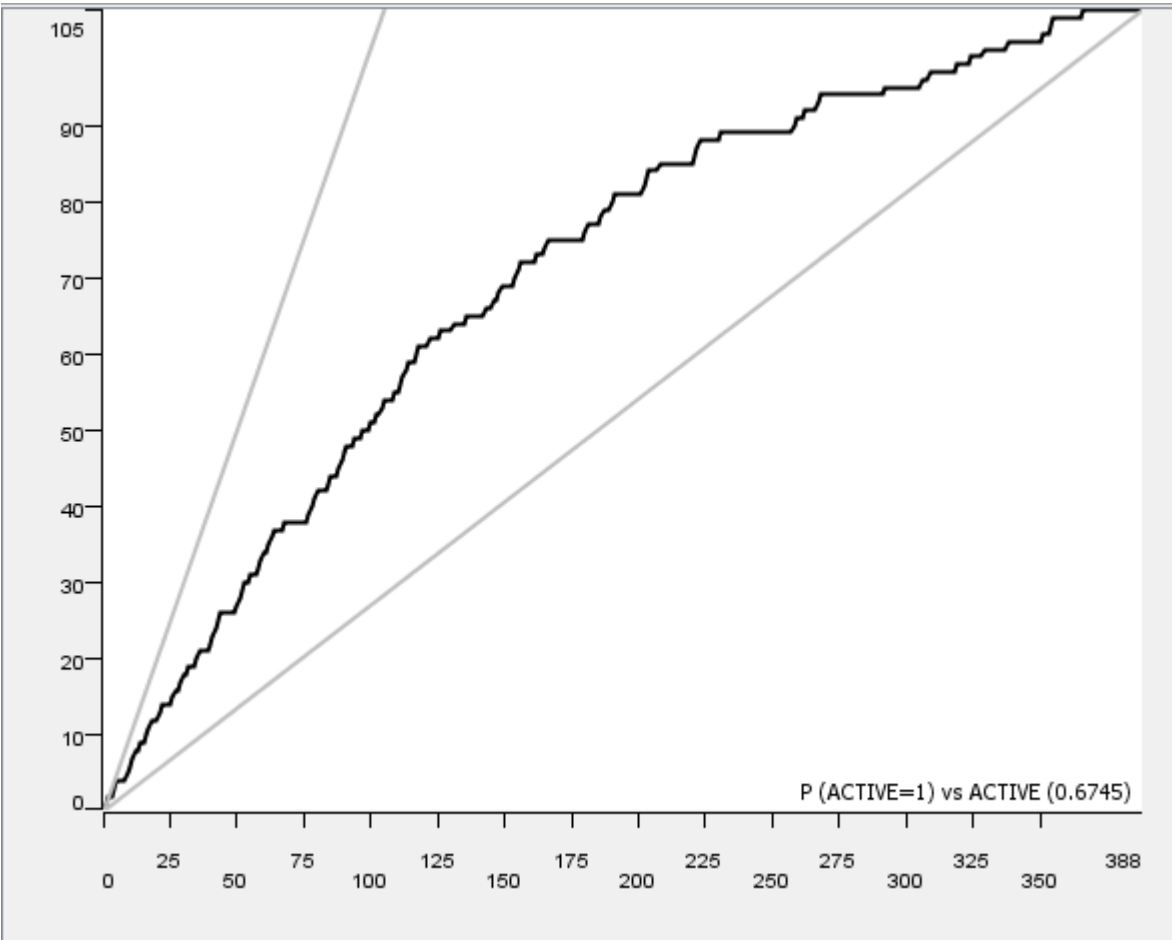

N=388

● P (ACTIVE=1) ● random

| Top 10% Mean IC50 | 64.8 nM |
|-------------------|---------|
|-------------------|---------|

|          | Predicted Active | Predicted Inactive |
|----------|------------------|--------------------|
| Active   | 64               | 41                 |
| Inactive | 67               | 216                |

<20nM DefGood in PARP1, 40% error;  
Random seed = 121783

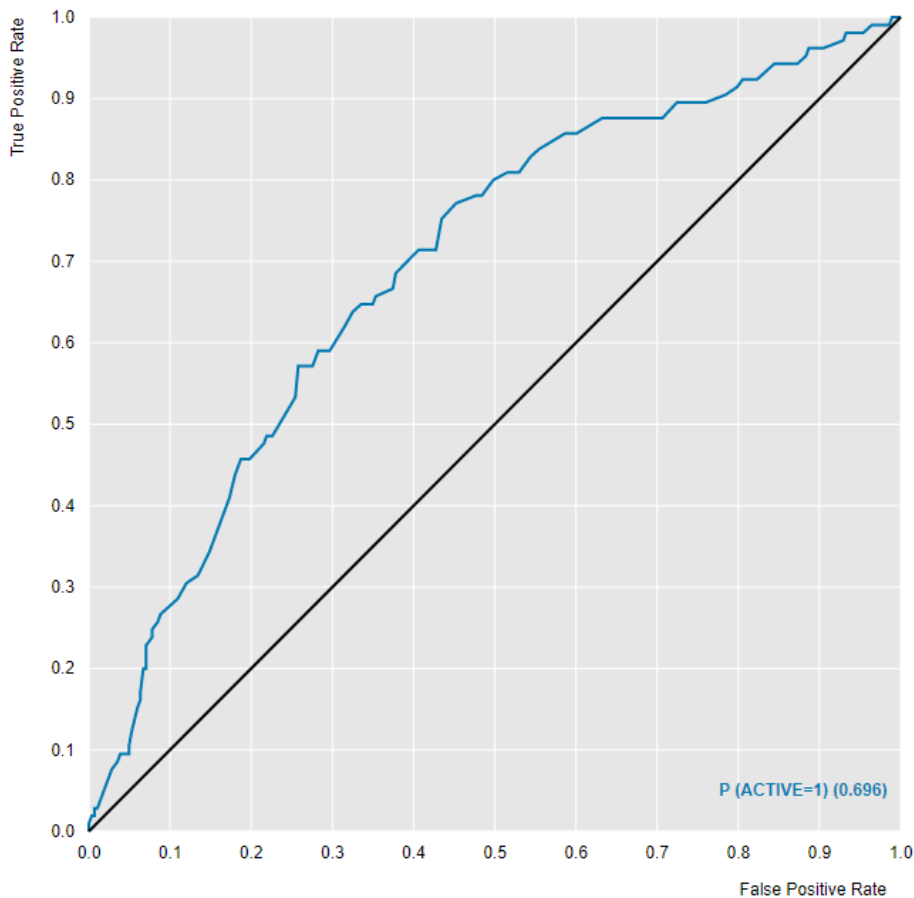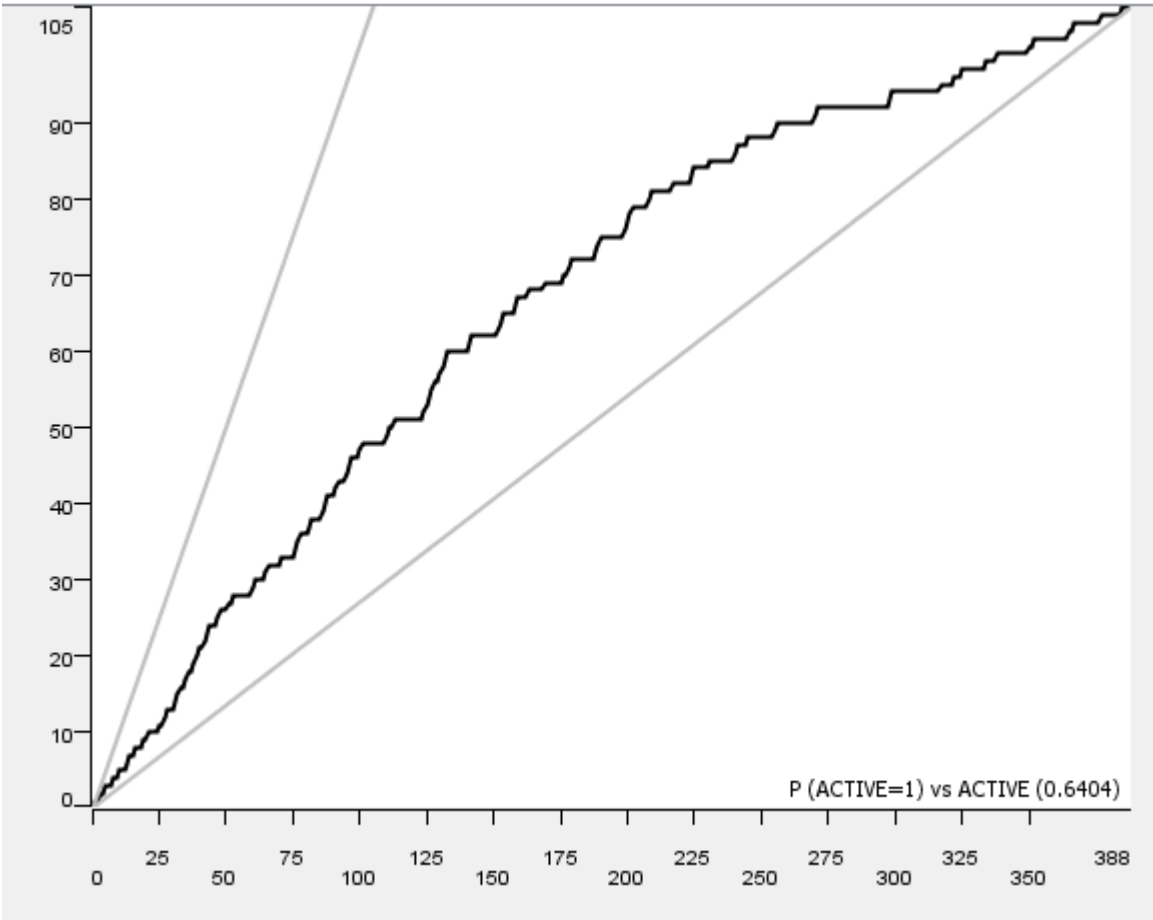

N=388

● P (ACTIVE=1) ● random

|                      |        |
|----------------------|--------|
| Top 10% Mean<br>IC50 | 194 nM |
|----------------------|--------|

|          | Predicted Active | Predicted Inactive |
|----------|------------------|--------------------|
| Active   | 62               | 43                 |
| Inactive | 82               | 201                |

# Conclusion - RF

- A Random Forrest could be generated for PARP1 kinase with a decision value of  $<20$  nM as defined as active. The predictivity of the algorithm could be preserved in three random train/test cycles as error was introduced in the training set. The point of failure was 40%, 25% and 40% error.

PNN- <20nM DefGood in PARP1, 5% error ;  
Random seed = 1515533876005

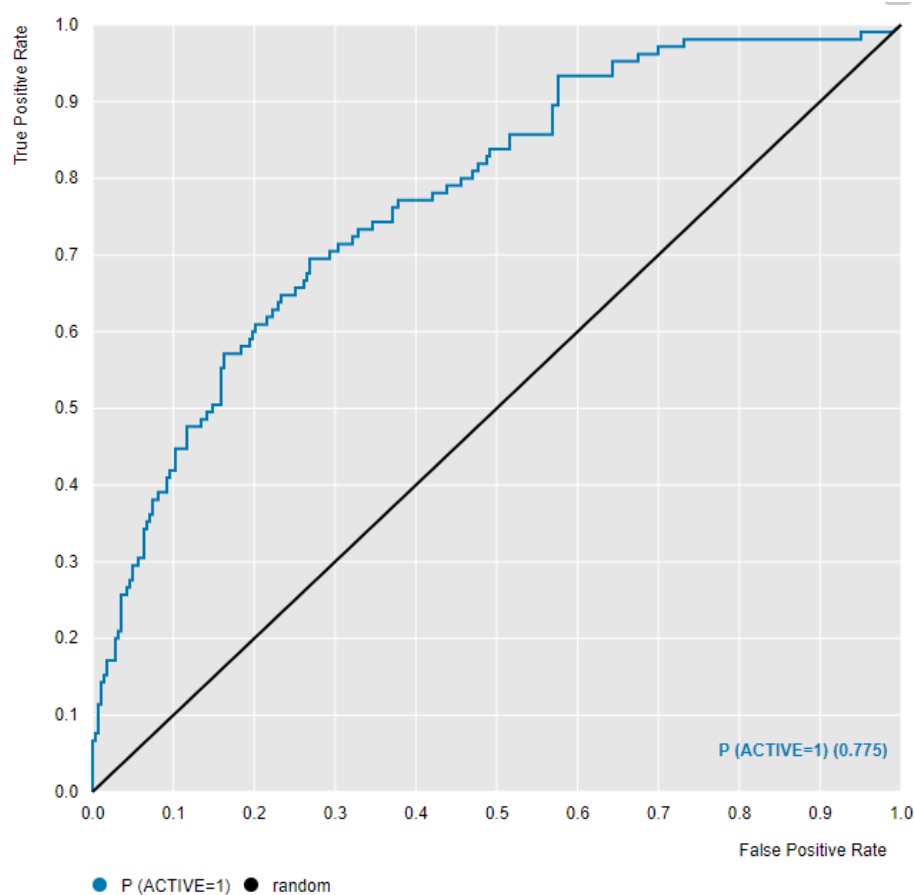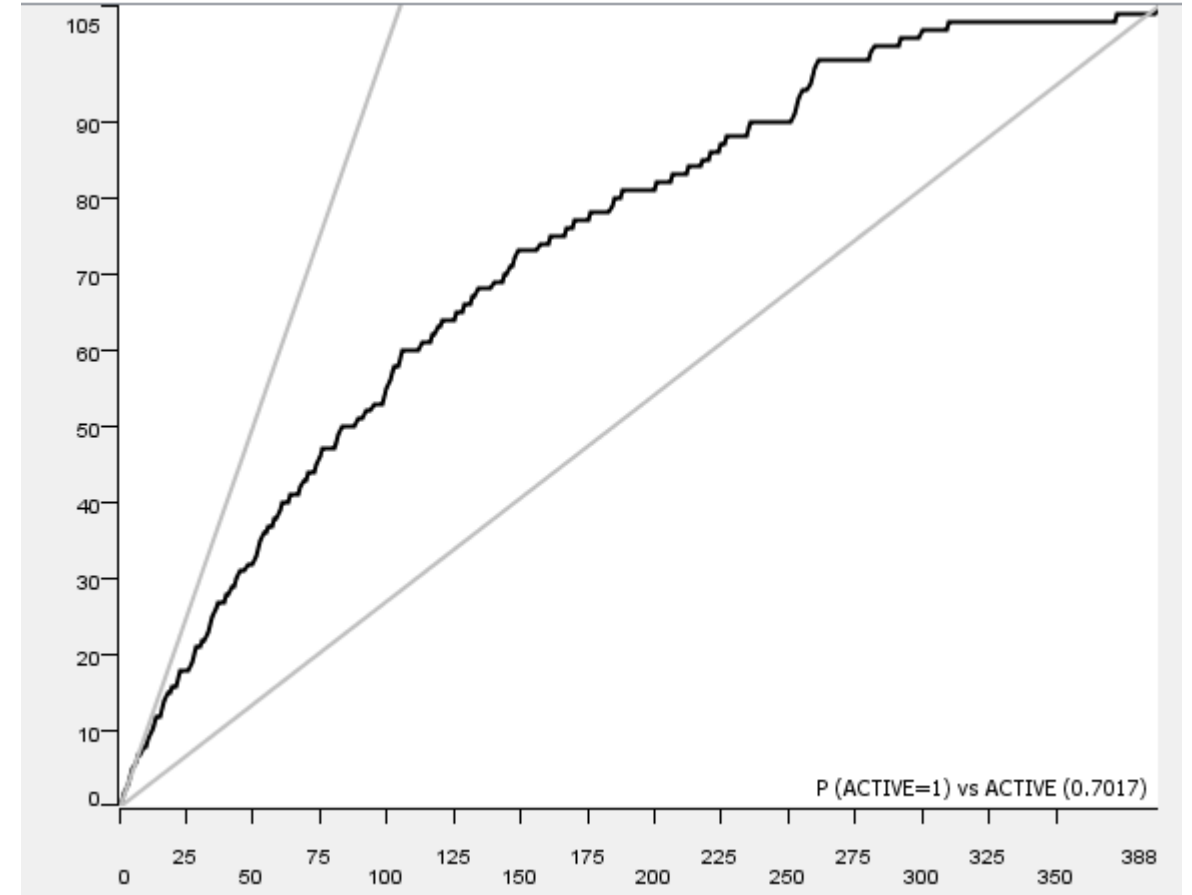

N=388

Top 10% Mean IC50

2,600 nM  
Several Micromolar  
mistakes

|          | Predicted Active | Predicted Inactive |
|----------|------------------|--------------------|
| Active   | 7                | 98                 |
| Inactive | 0                | 283                |

PNN - <20nM DefGood in PARP1, 5% error; Random seed = 1515533876005  
(reparameterized Theta minus = 0.05; theta plus = 0.95)

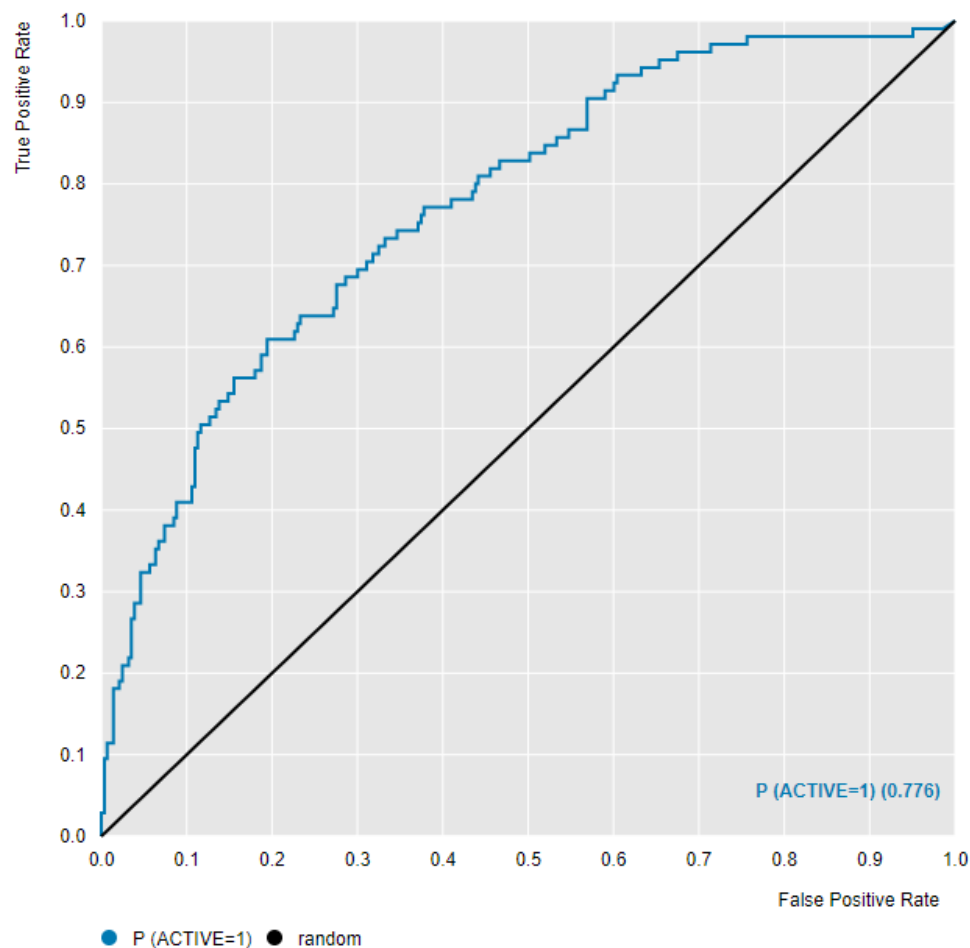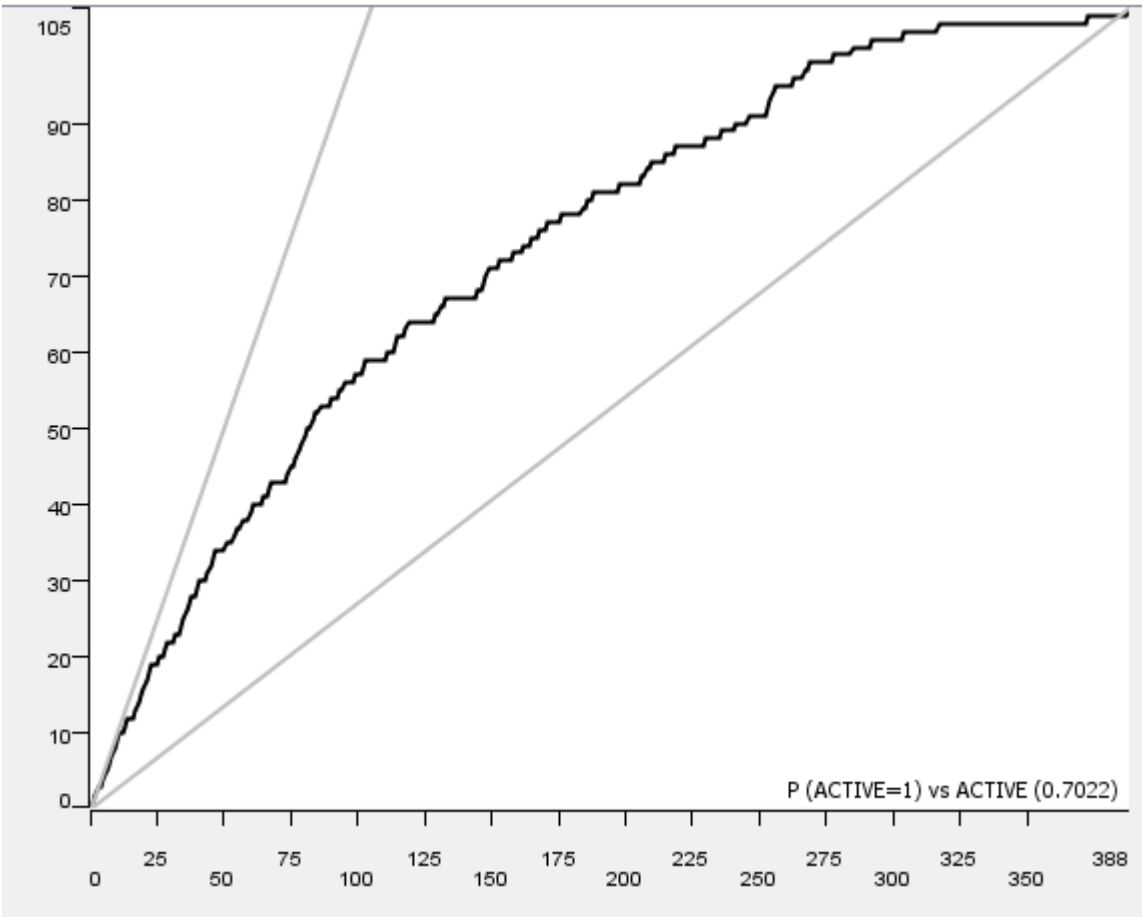

N=388

|                   |         |
|-------------------|---------|
| Top 10% Mean IC50 | 49.9 nM |
|-------------------|---------|

|          | Predicted Active | Predicted Inactive |
|----------|------------------|--------------------|
| Active   | 24               | 81                 |
| Inactive | 10               | 273                |

PNN- <20nM DefGood in PARP1, 10% error ;  
Random seed = 1515533876005

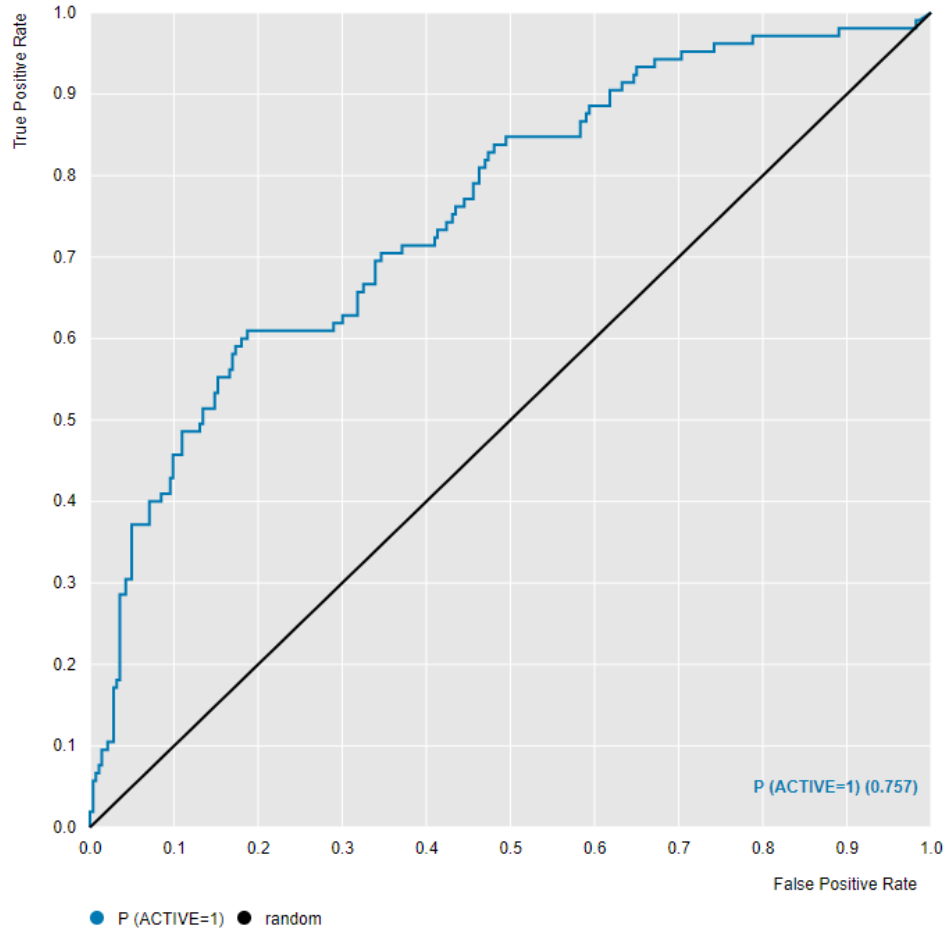

N=388

Top 10% Mean IC50

27.4 nM

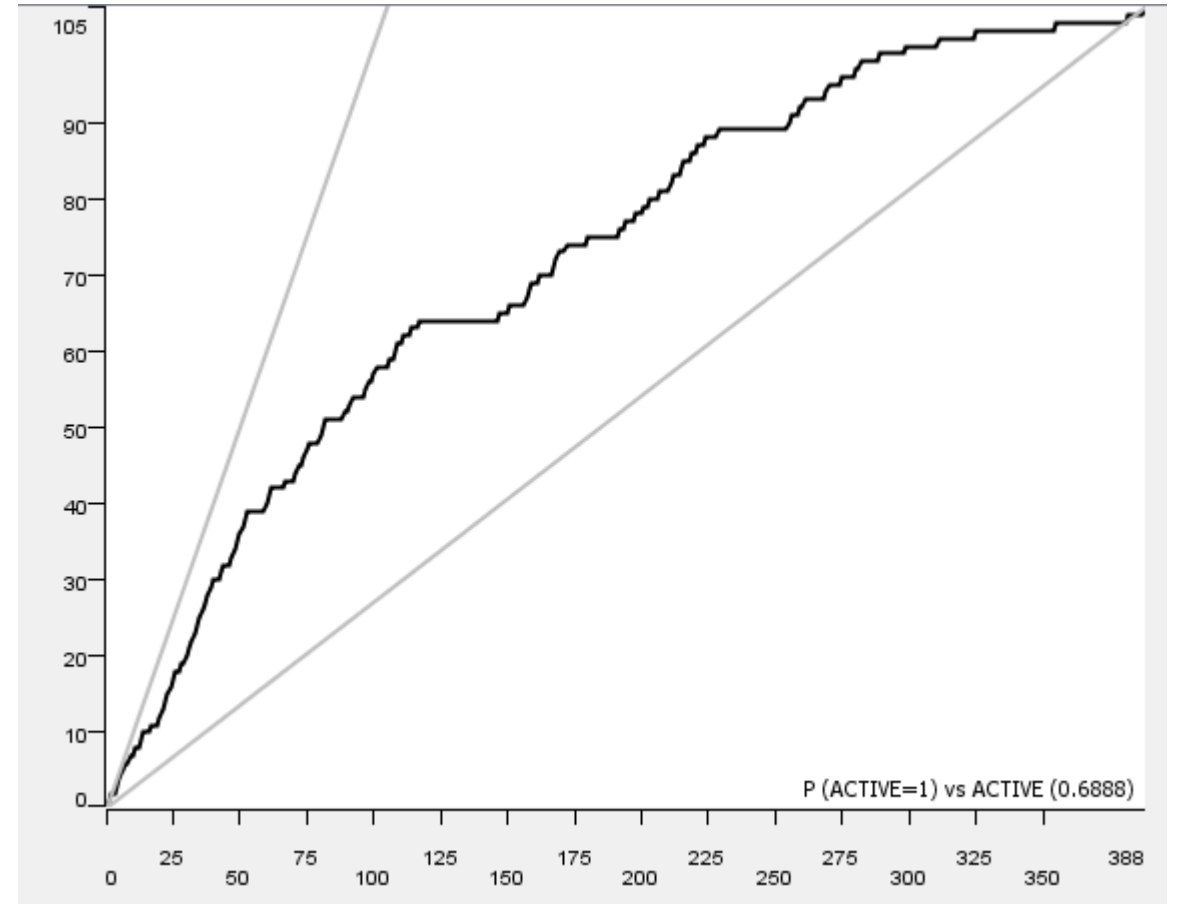

|          | Predicted Active | Predicted Inactive |
|----------|------------------|--------------------|
| Active   | 42               | 63                 |
| Inactive | 23               | 260                |

PNN- <20nM DefGood in PARP1, 20% error ;  
Random seed = 1515533876005

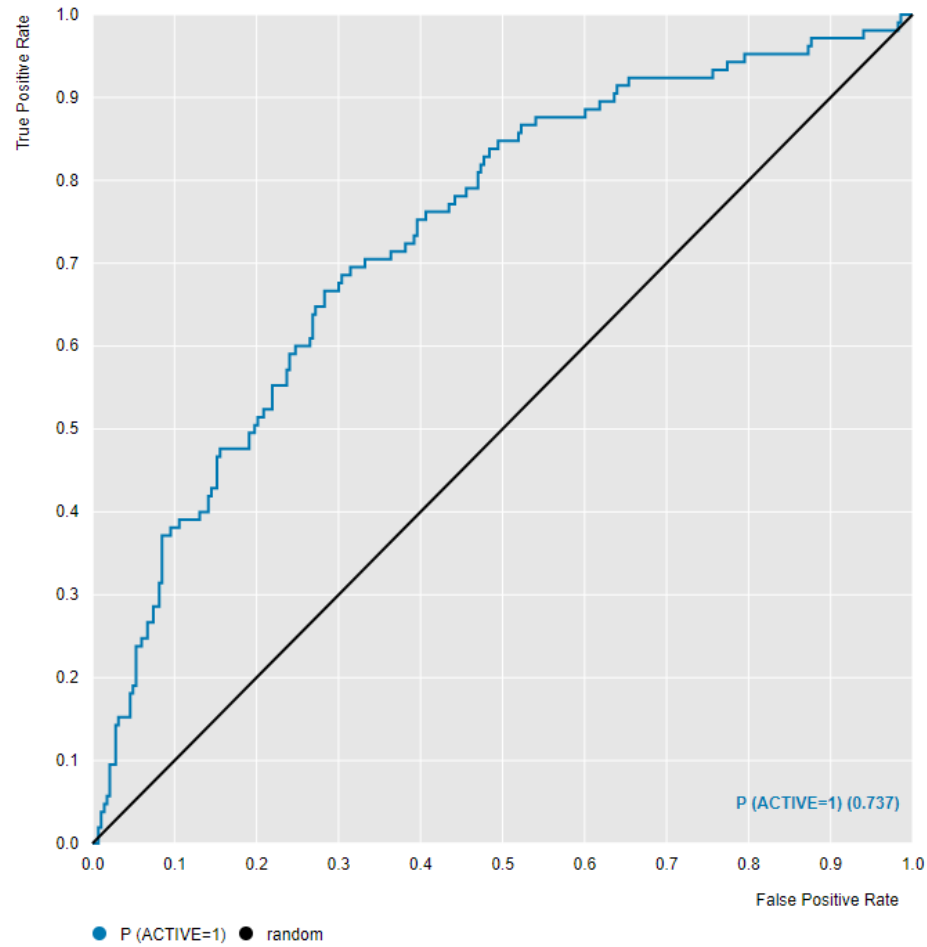

N=388

Top 10% Mean IC50

146 nM

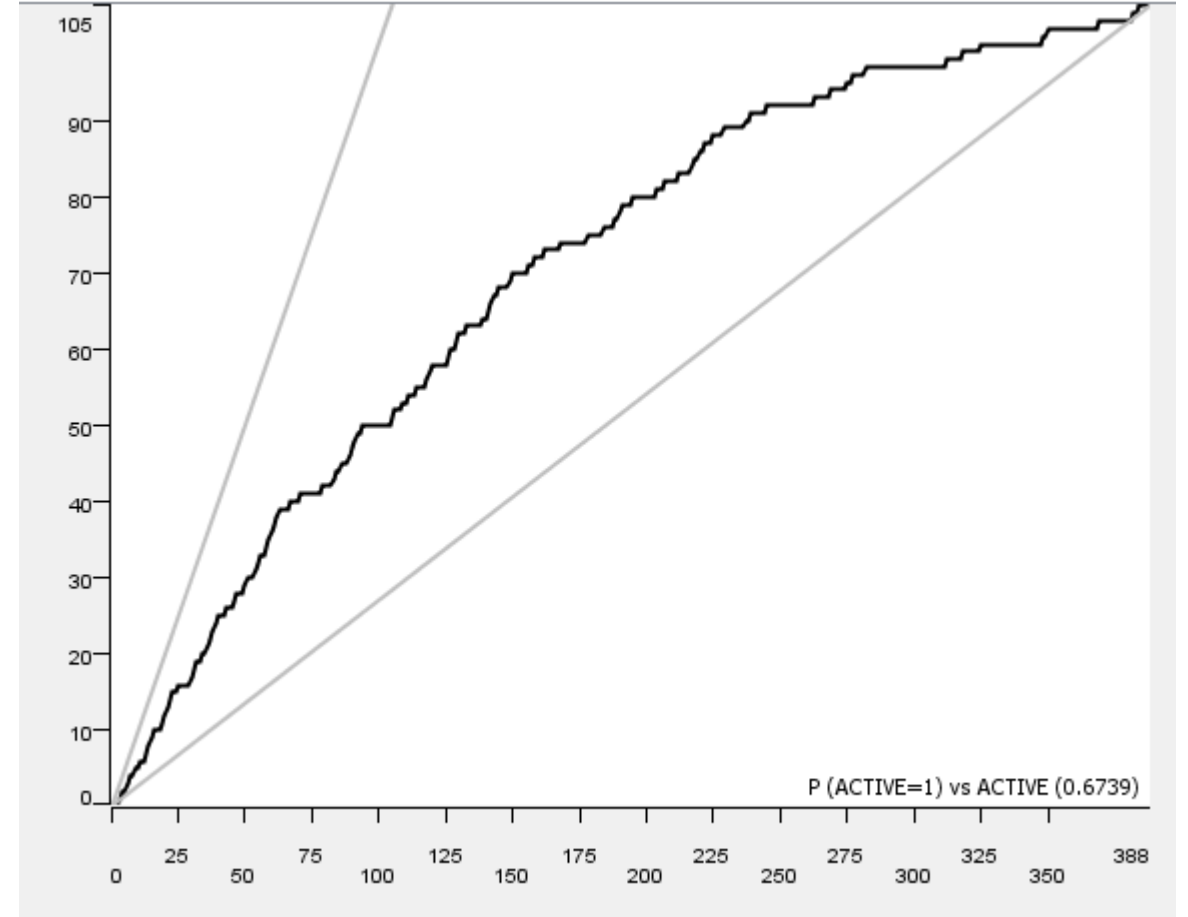

|          | Predicted Active | Predicted Inactive |
|----------|------------------|--------------------|
| Active   | 41               | 64                 |
| Inactive | 36               | 247                |



PNN- <20nM DefGood in PARP1, 25% error ;  
Random seed = 1515533876005

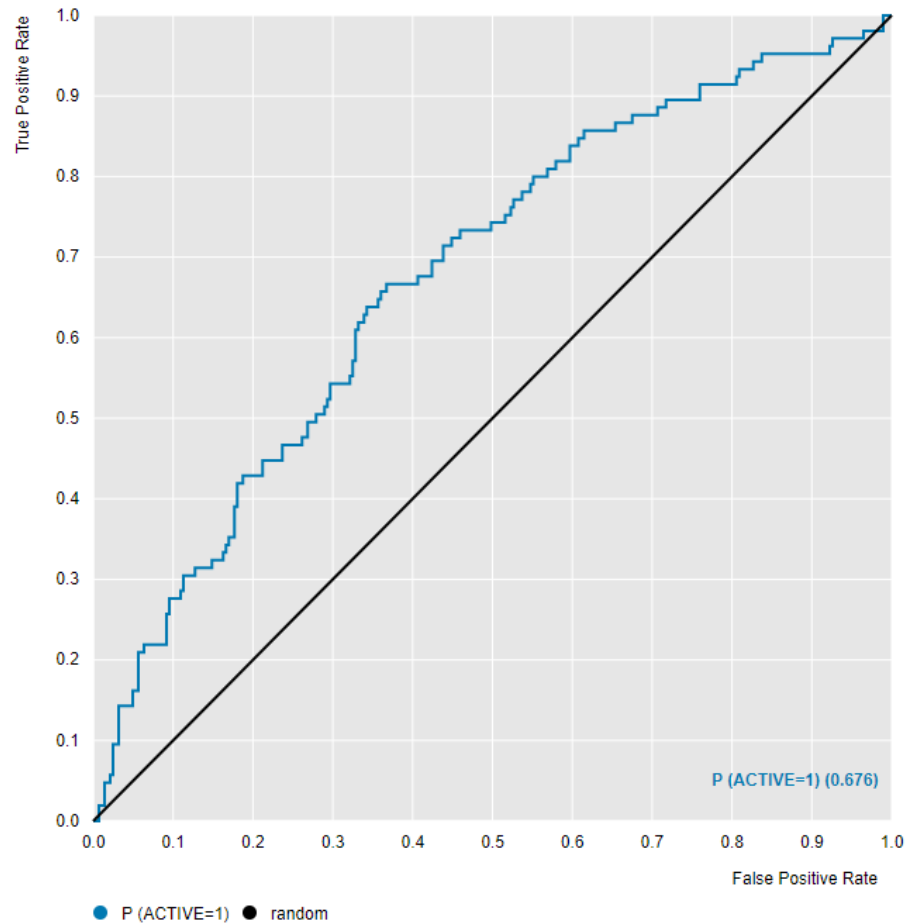

N=388

Top 10% Mean IC50

318 nM

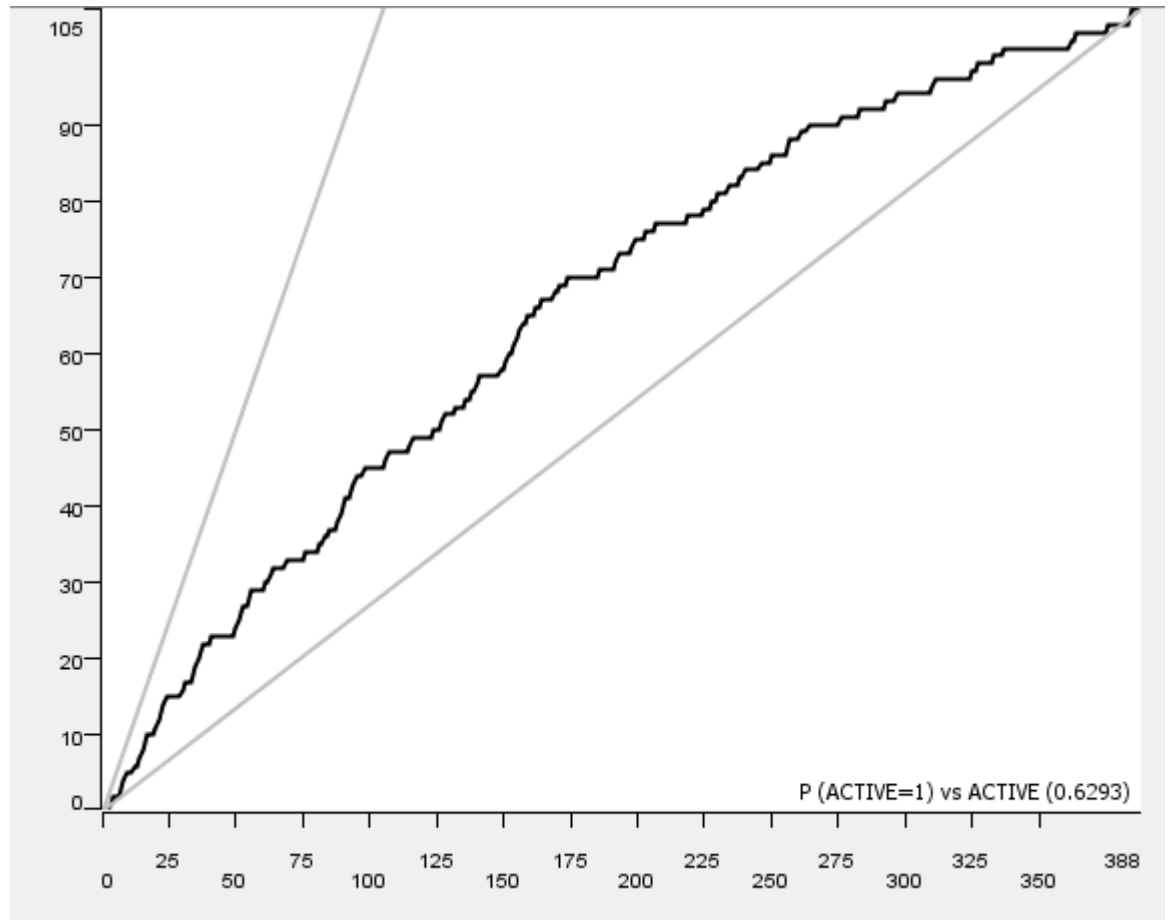

|          | Predicted Active | Predicted Inactive |
|----------|------------------|--------------------|
| Active   | 34               | 71                 |
| Inactive | 42               | 241                |

PNN - <20nM DefGood in PARP1, 25% error; Random seed = 1515533876005  
(reparameterized Theta minus = 0.55; theta plus = 0.65)

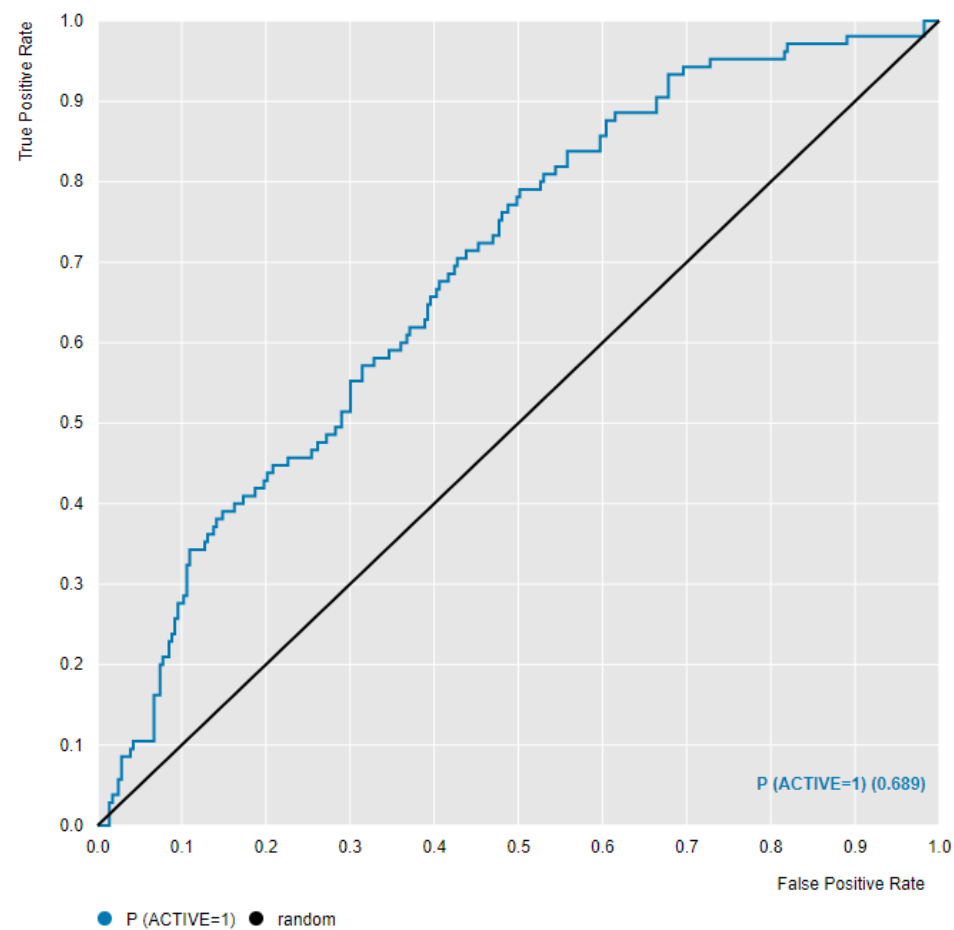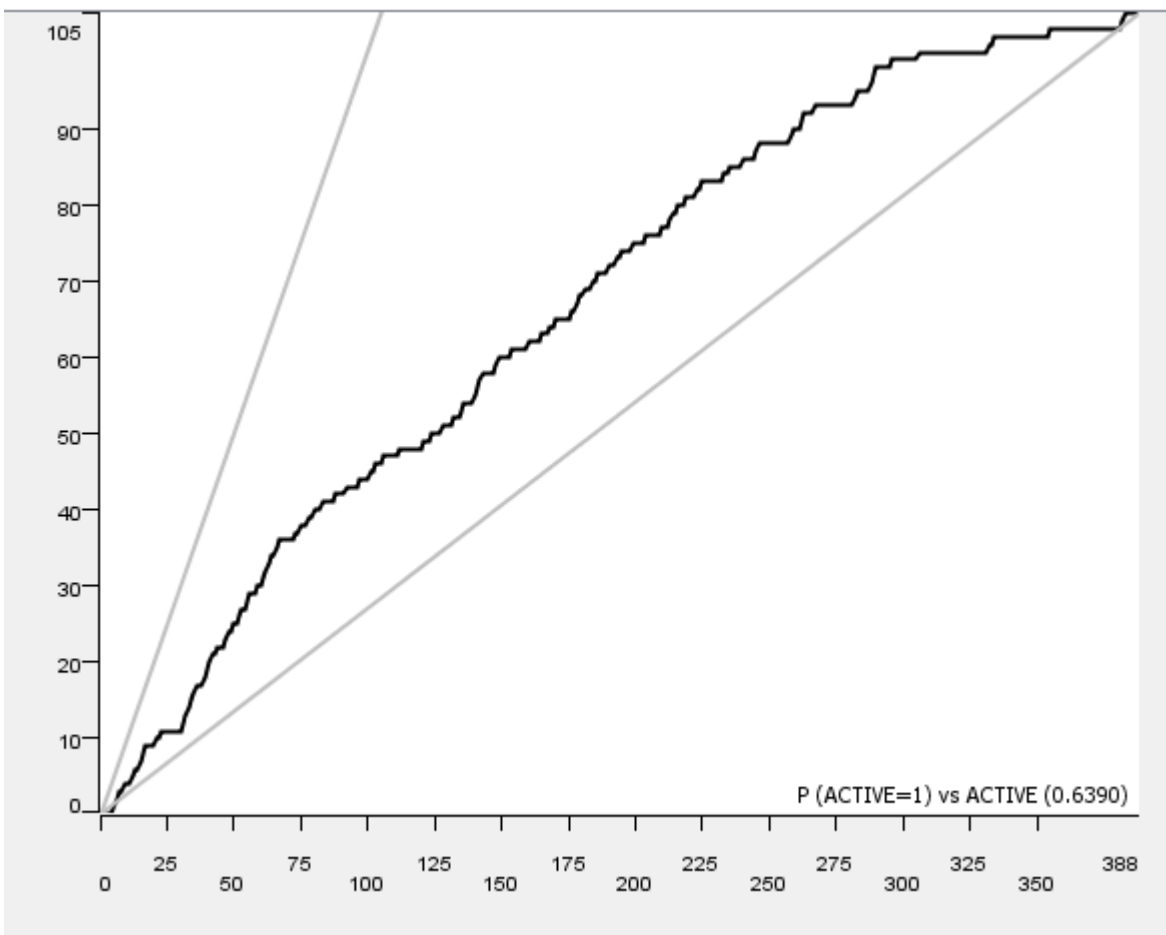

N=388

|                      |        |
|----------------------|--------|
| Top 10% Mean<br>IC50 | 718 nM |
|----------------------|--------|

|          | Predicted Active | Predicted Inactive |
|----------|------------------|--------------------|
| Active   | 0                | 105                |
| Inactive | 4                | 279                |

# PNN- <20nM DefGood in PARP1, 5% error ;

## Random seed = 429

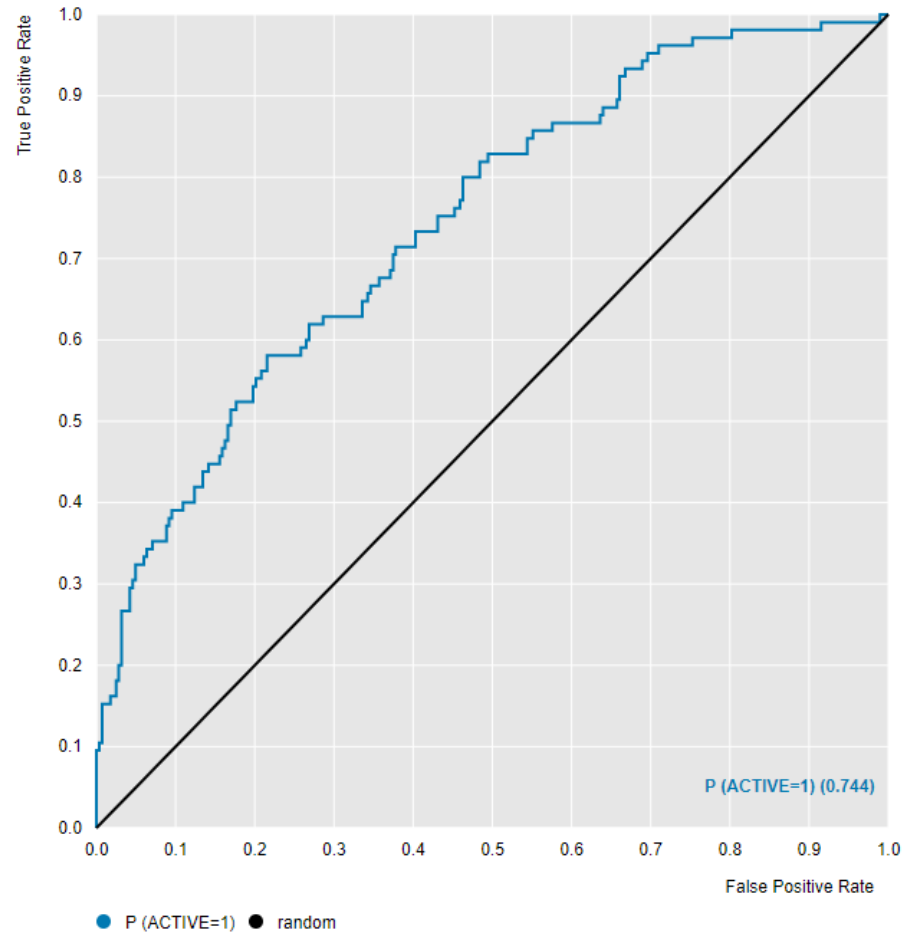

N=388

Top 10% Mean IC50

2,800 nM

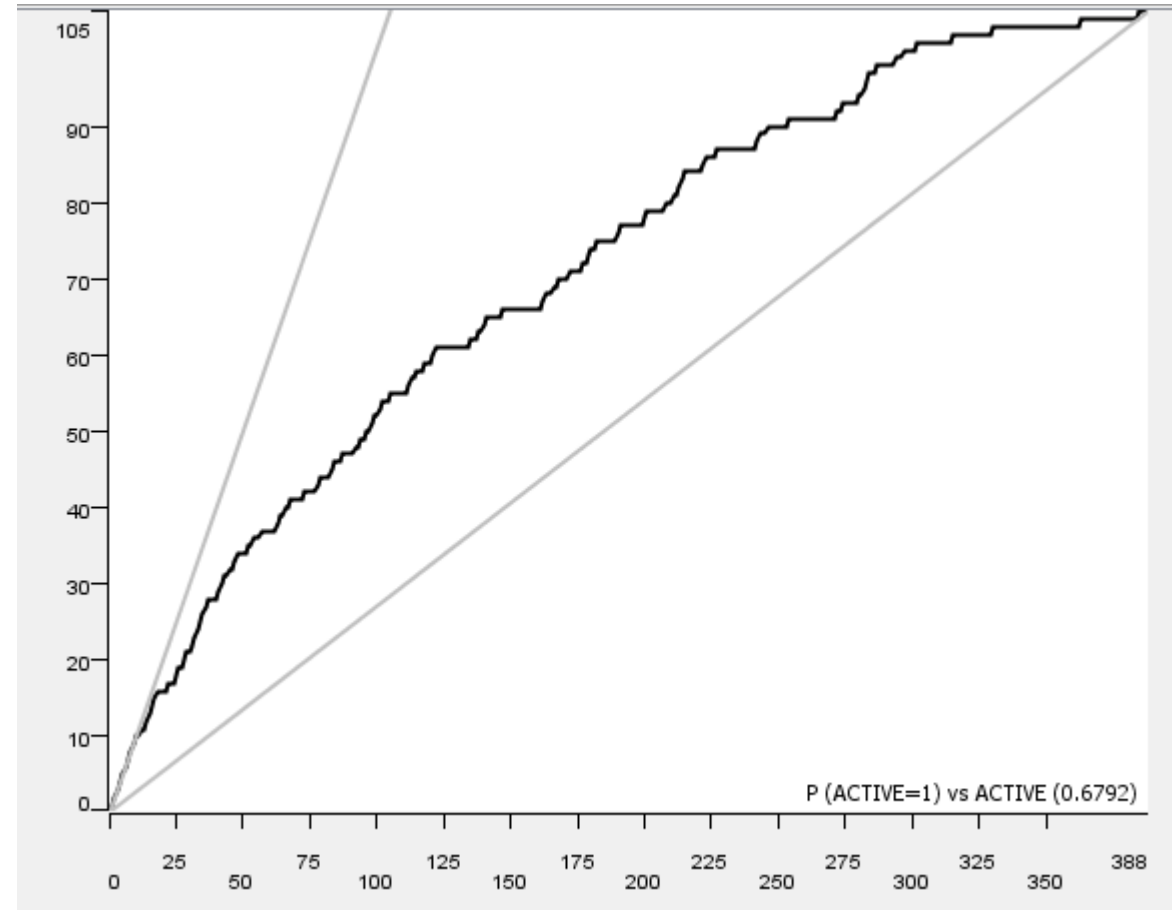

|          | Predicted Active | Predicted Inactive |
|----------|------------------|--------------------|
| Active   | 18               | 87                 |
| Inactive | 7                | 276                |

PNN - <20nM DefGood in PARP1, 5% error; Random seed = 429 (reparameterized  
Theta minus = 0.05; theta plus = 0.75)

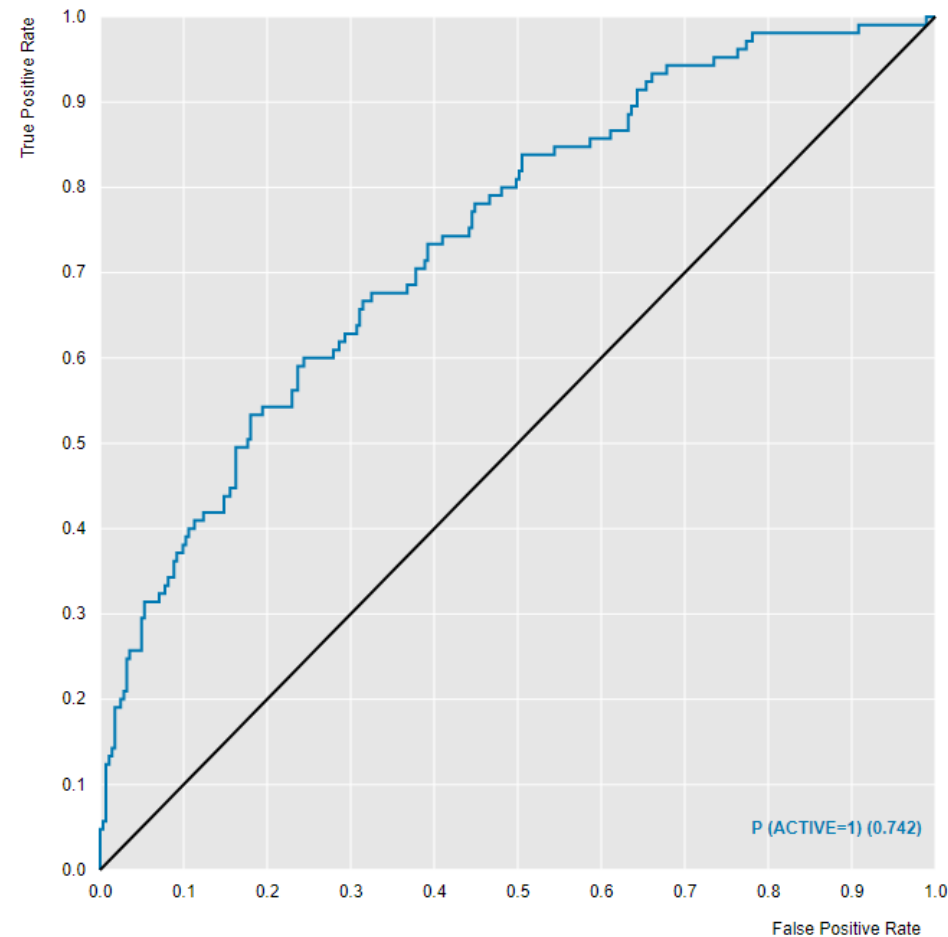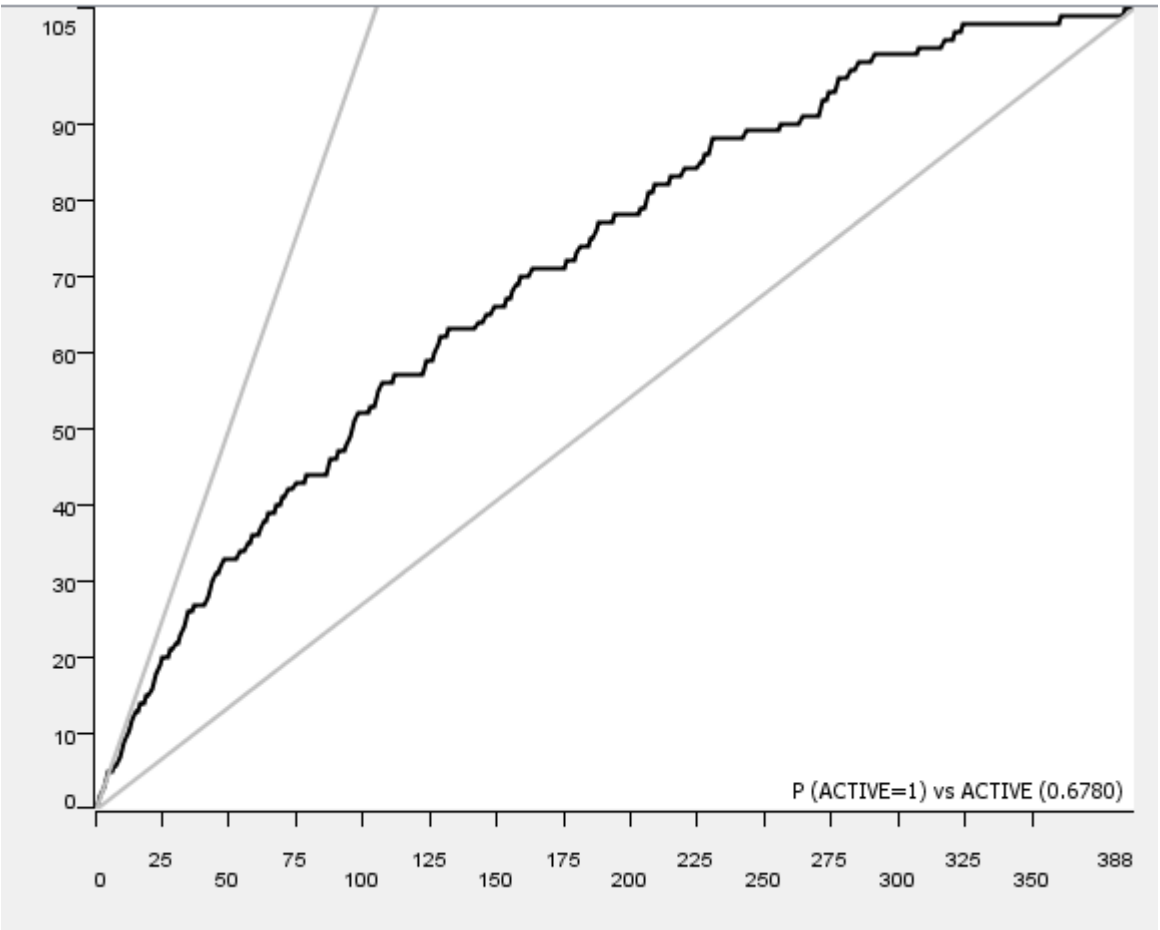

N=388

|                   |          |
|-------------------|----------|
| Top 10% Mean IC50 | 2,800 nM |
|-------------------|----------|

|          | Predicted Active | Predicted Inactive |
|----------|------------------|--------------------|
| Active   | 35               | 70                 |
| Inactive | 22               | 261                |

PNN - <20nM DefGood in PARP1, 5% error;  
Random seed = 121783

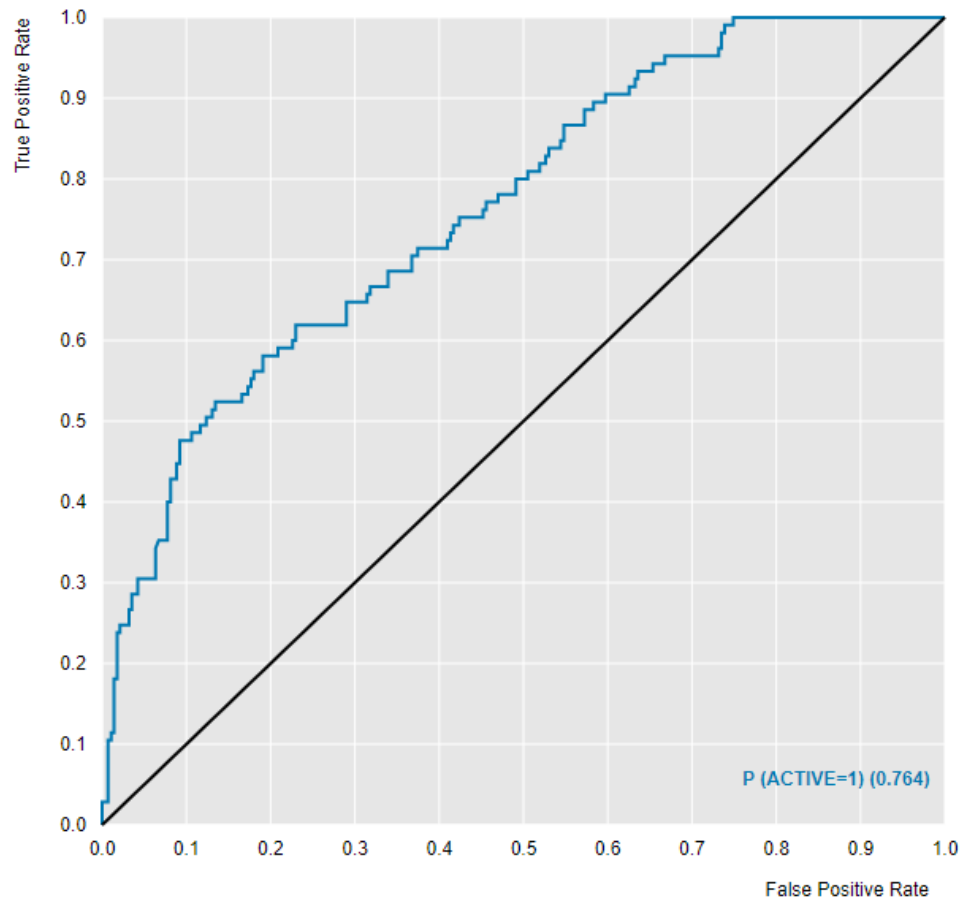

N=388

● P (ACTIVE=1) ● random

| Top 10% Mean<br>IC50 | 73.0 nM |
|----------------------|---------|
|----------------------|---------|

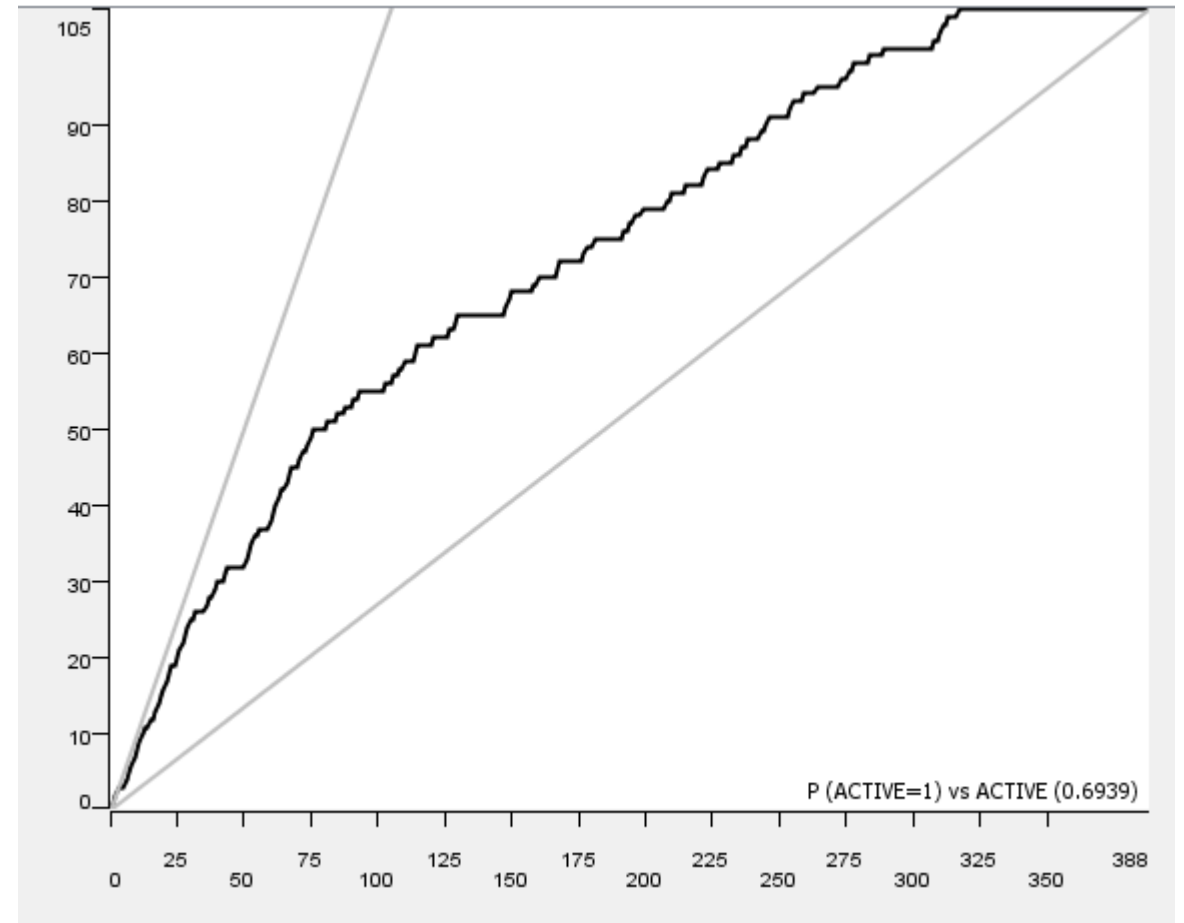

|          | Predicted Active | Predicted Inactive |
|----------|------------------|--------------------|
| Active   | 16               | 89                 |
| Inactive | 4                | 279                |

PNN - <20nM DefGood in PARP1, 10% error;  
Random seed = 121783

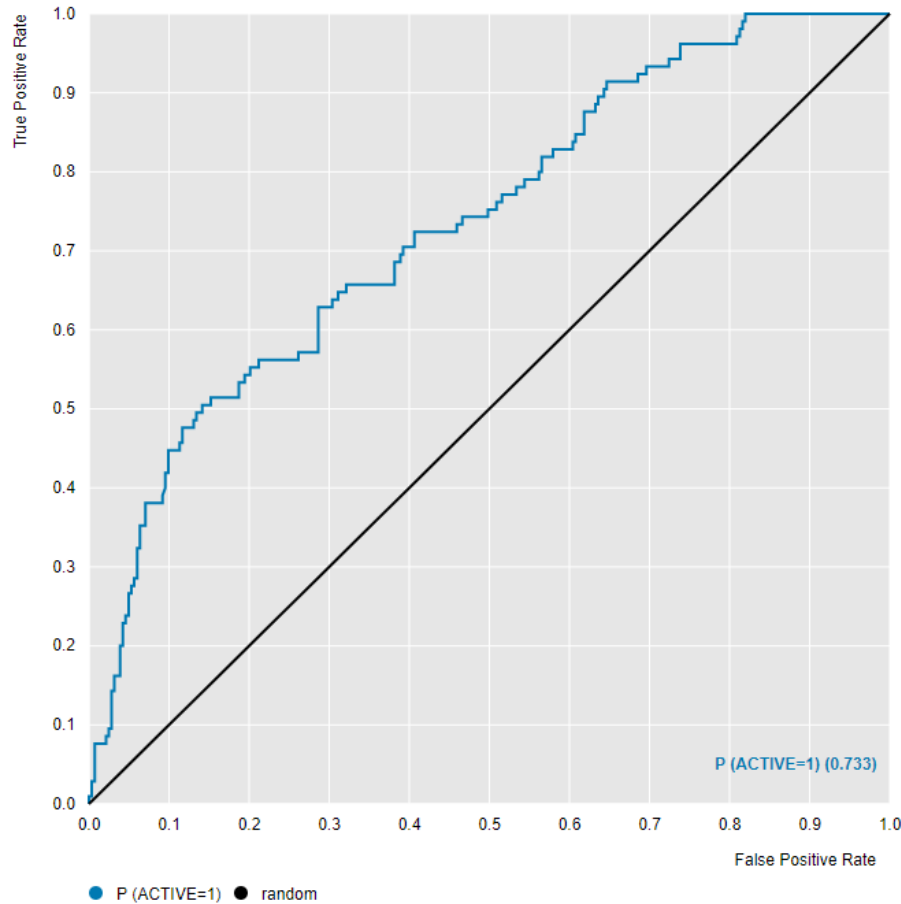

N=388

Top 10% Mean  
IC50

274 nM

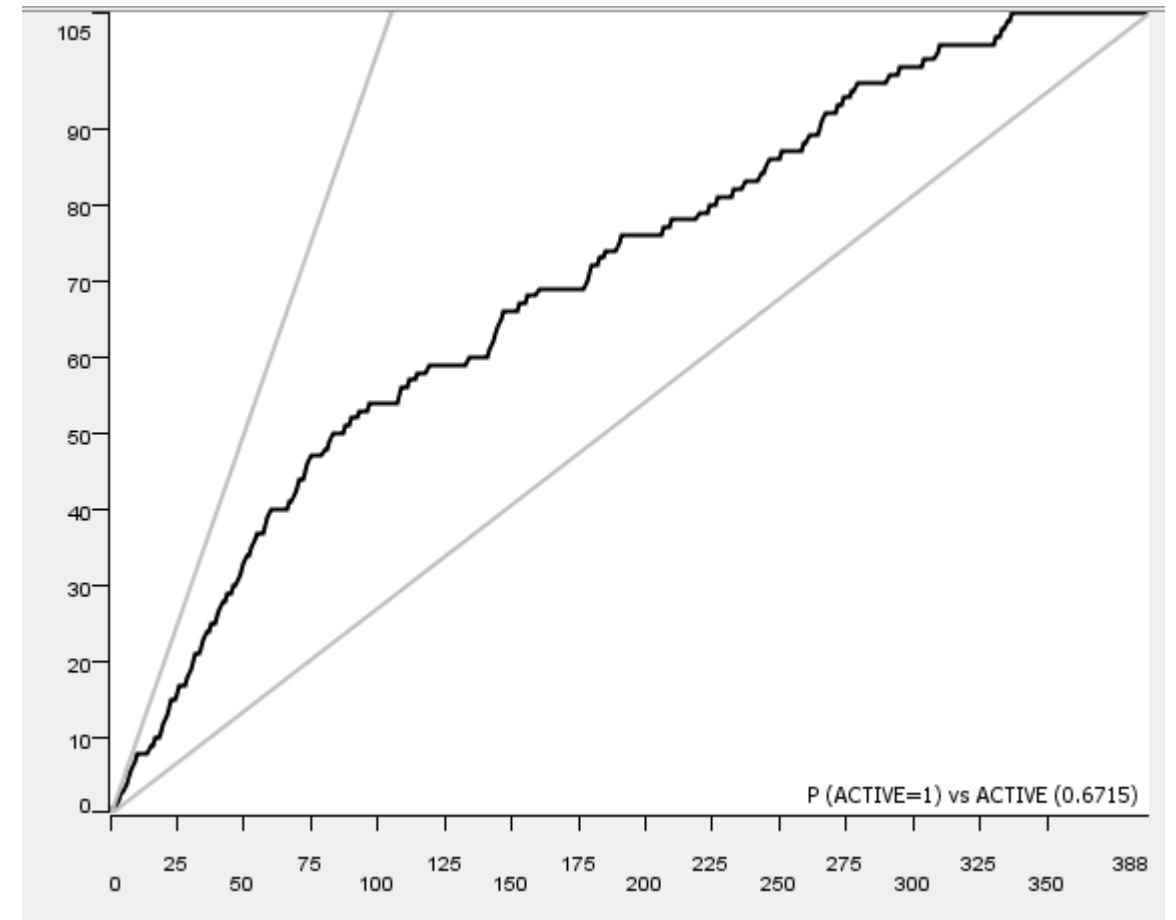

|          | Predicted Active | Predicted Inactive |
|----------|------------------|--------------------|
| Active   | 18               | 87                 |
| Inactive | 11               | 272                |

PNN - <20nM DefGood in PARP1, 15% error;  
Random seed = 121783

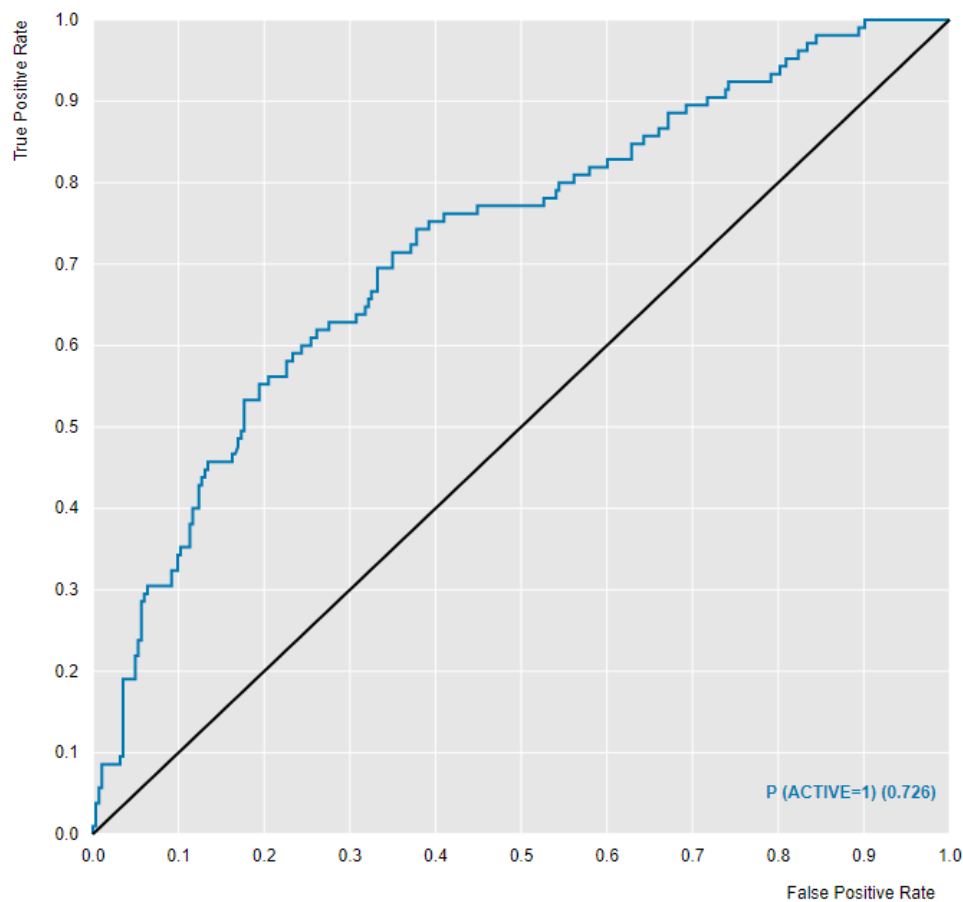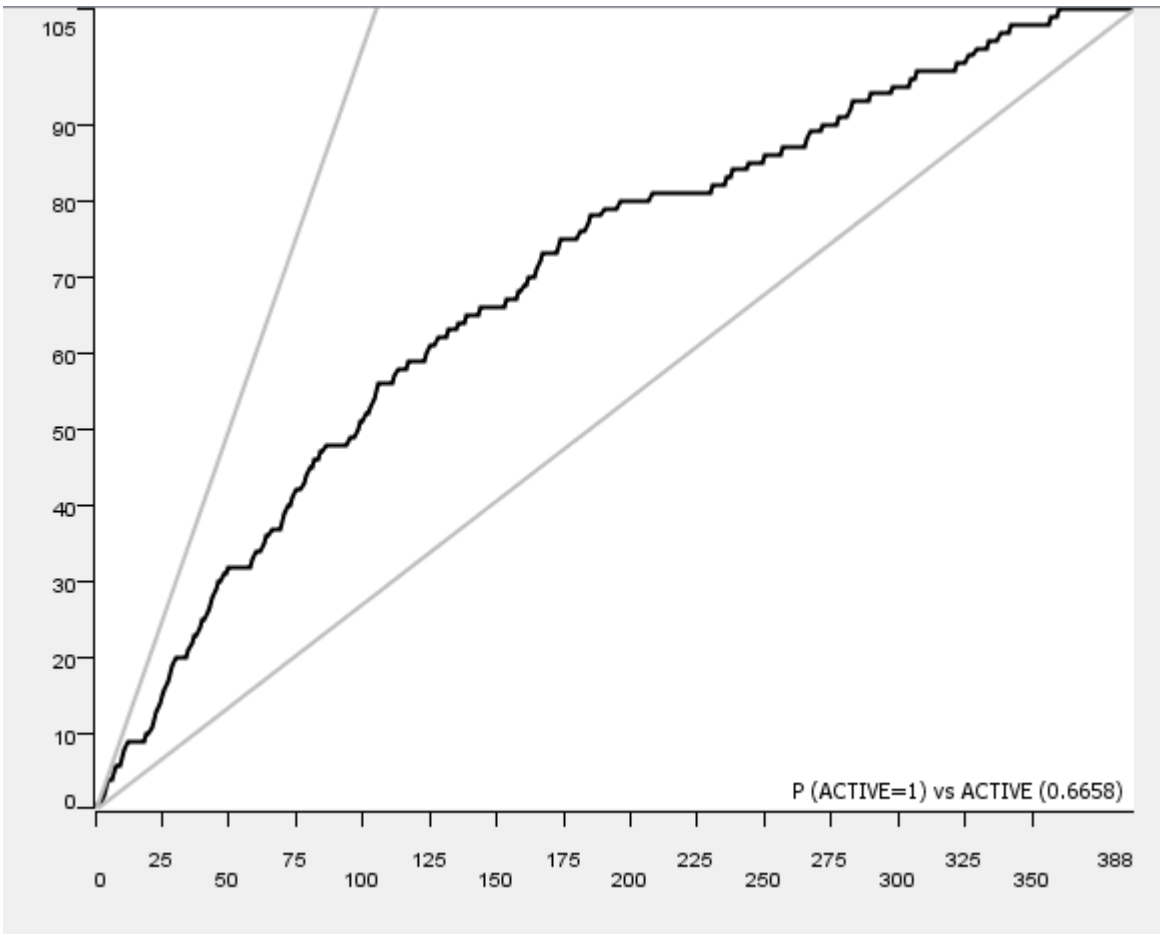

N=388

● P (ACTIVE=1) ● random

| Top 10% Mean IC50 | 232 nM |
|-------------------|--------|
|-------------------|--------|

|          | Predicted Active | Predicted Inactive |
|----------|------------------|--------------------|
| Active   | 20               | 85                 |
| Inactive | 14               | 269                |

PNN - <20nM DefGood in PARP1, 20% error;  
Random seed = 121783

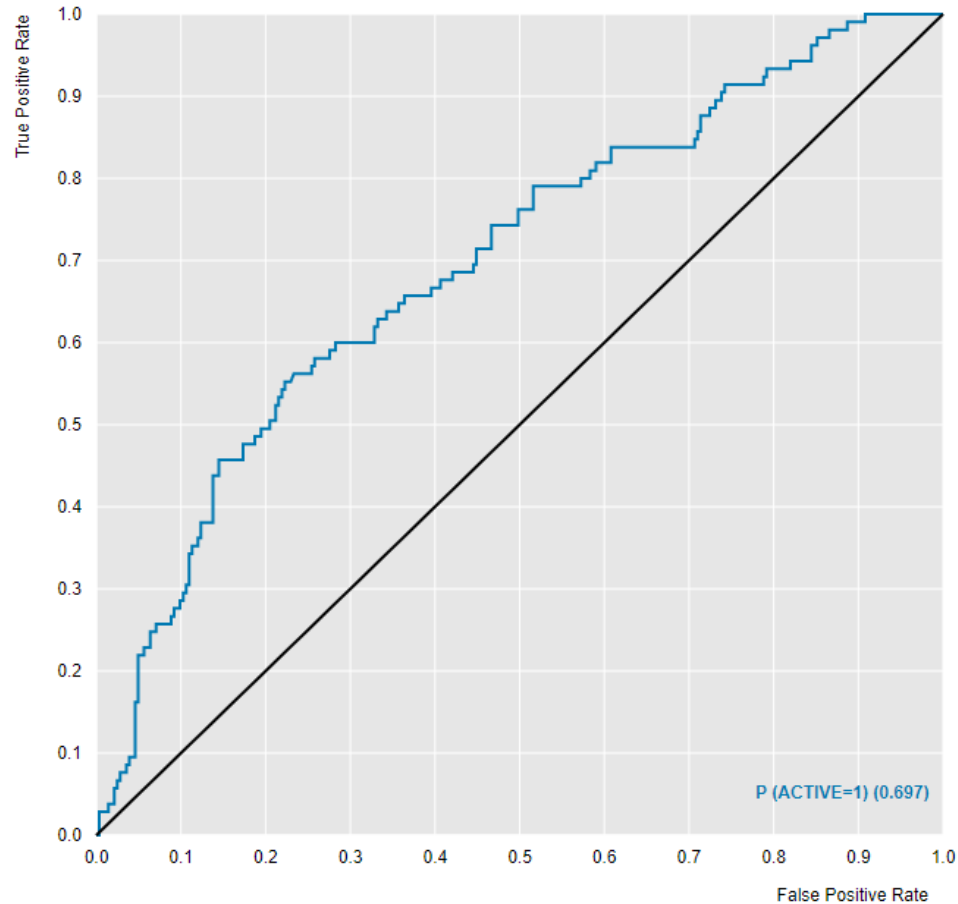

N=388

● P (ACTIVE=1) ● random

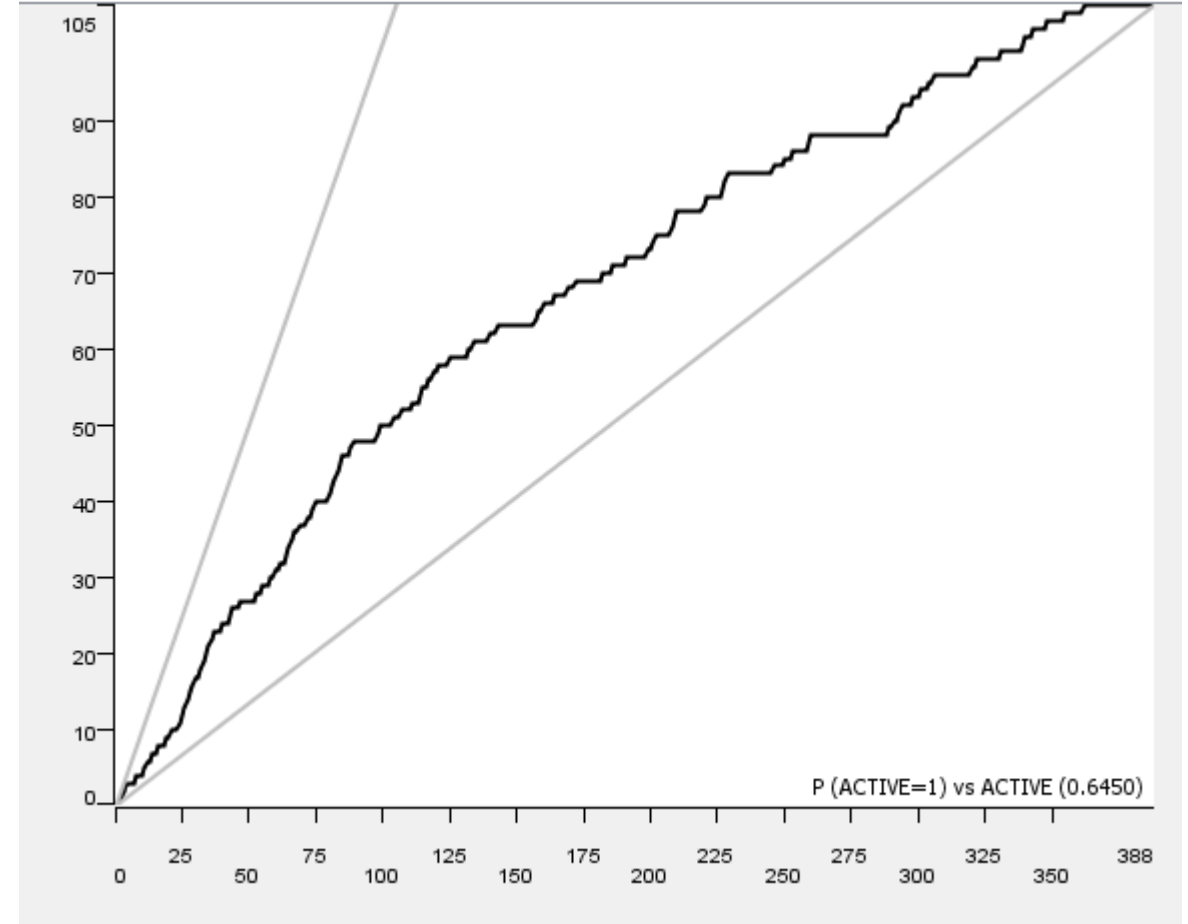

Top 10% Mean  
IC50

336 nM

|          | Predicted Active | Predicted Inactive |
|----------|------------------|--------------------|
| Active   | 42               | 63                 |
| Inactive | 39               | 244                |



PNN - <20nM DefGood in PARP1, 20% error; Random seed = 121783  
(reparameterized Theta minus = 0.35; theta plus = 0.75)

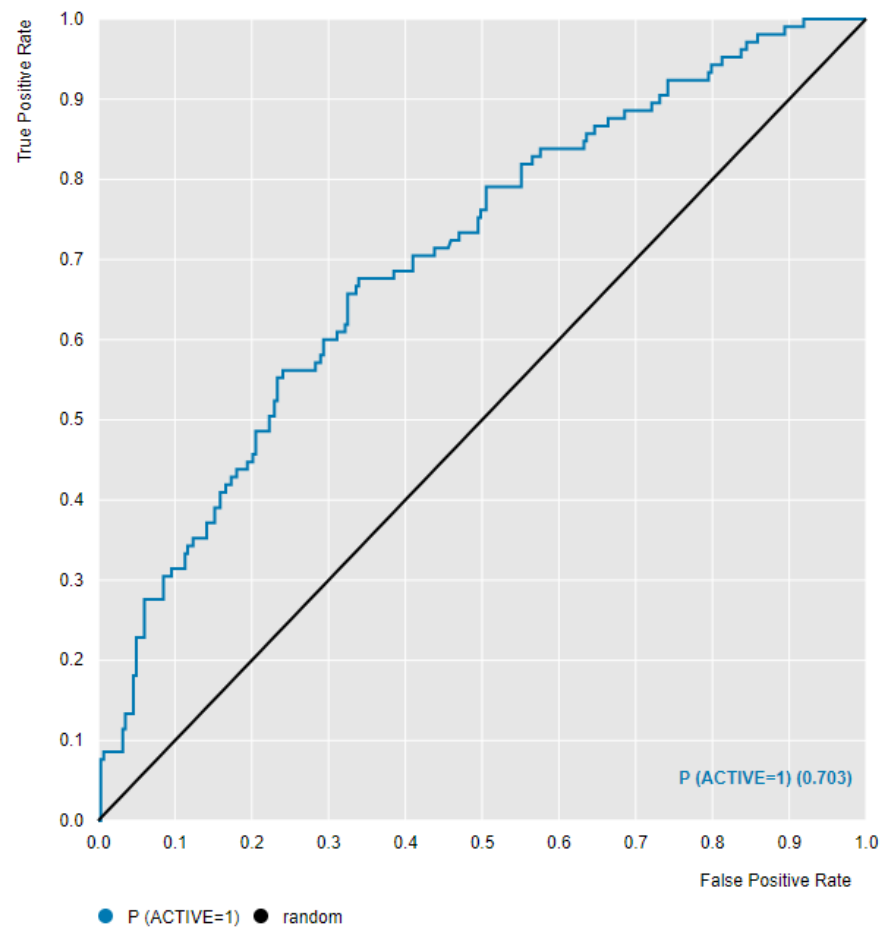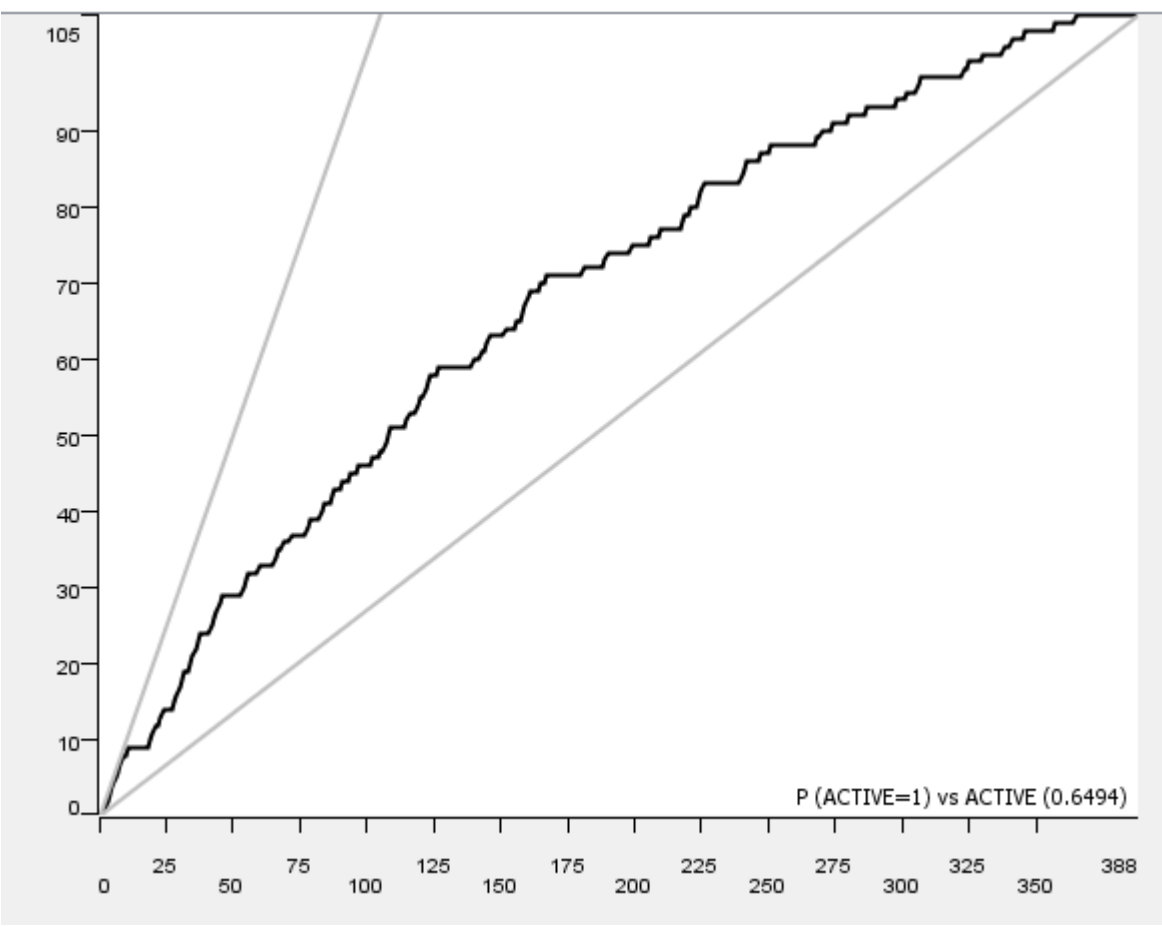

N=388

|                      |        |
|----------------------|--------|
| Top 10% Mean<br>IC50 | 150 nM |
|----------------------|--------|

|          | Predicted Active | Predicted Inactive |
|----------|------------------|--------------------|
| Active   | 14               | 91                 |
| Inactive | 12               | 271                |

PNN - <20nM DefGood in PARP1, 25% error; Random seed = 121783  
(reparameterized Theta minus = 0.35; theta plus = 0.65)

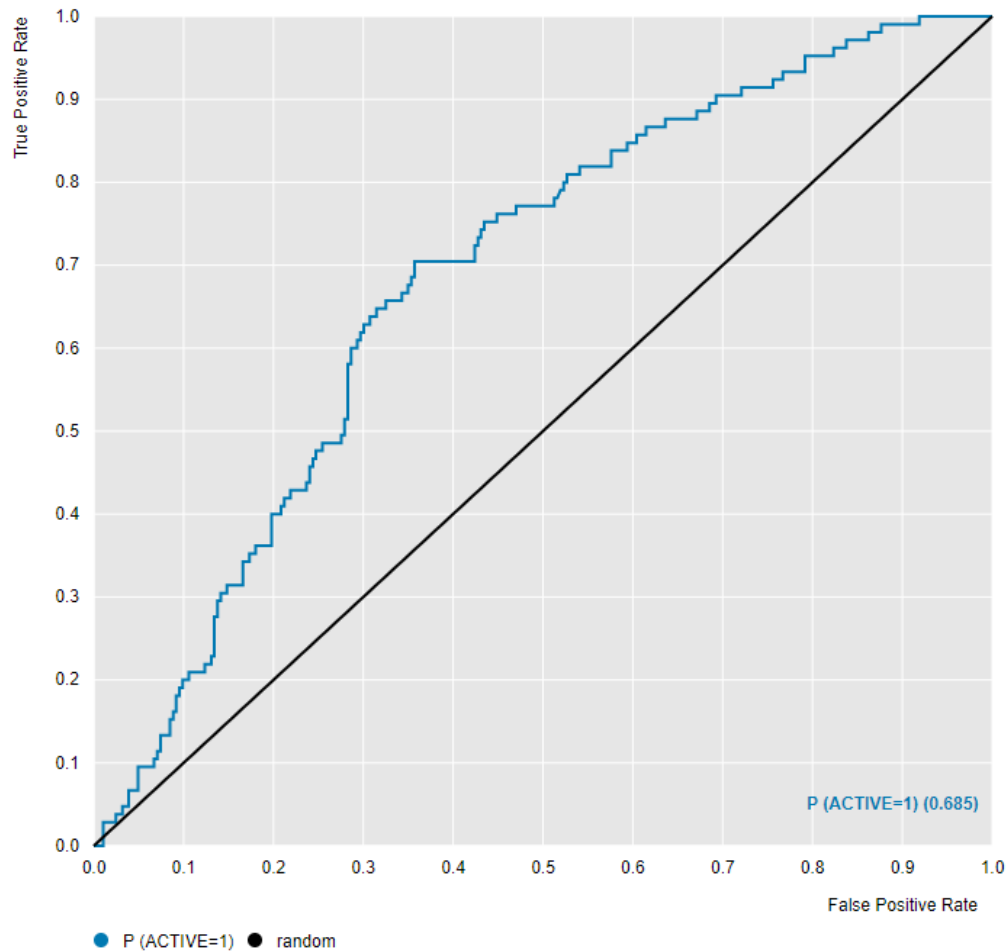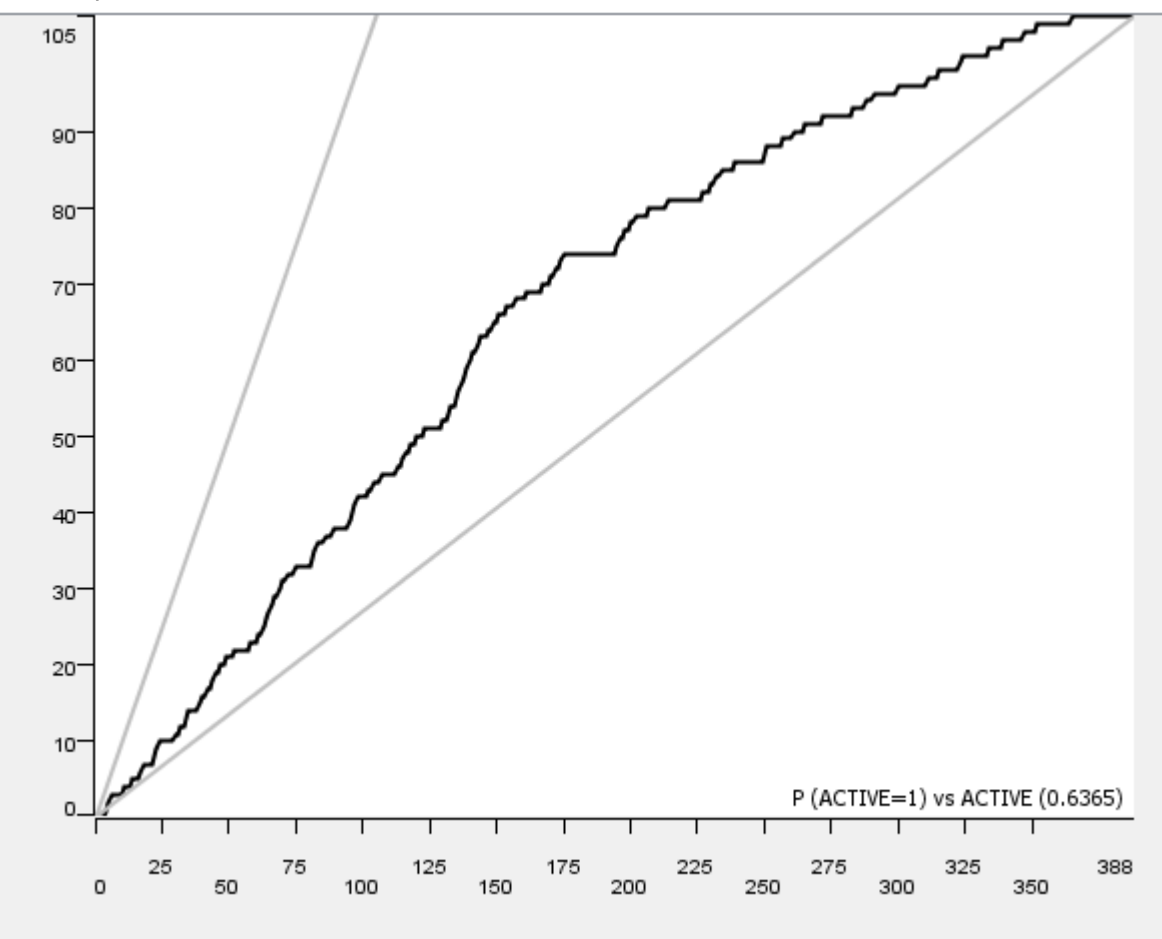

N=388

|                      |          |
|----------------------|----------|
| Top 10% Mean<br>IC50 | 1,900 nM |
|----------------------|----------|

|          | Predicted Active | Predicted Inactive |
|----------|------------------|--------------------|
| Active   | 32               | 73                 |
| Inactive | 40               | 243                |

# Conclusion - PNN

- Across three random seeds, the % error that lead to a significant enrichment failure and/or top 10% IC50 increase in the retrospective test was 25%, 5% and 25% for each unique random seed.
- Parameterization did not alter one of the failure points, and moved the point of failure from 20% to 25% in the last random split. However, reparameterization did rescue a significant failure in this instance as the first random split went from 5% to 25%.

TYRO3

# TYRO3 NBN Design

- Rules -  $\$RELATION\$ = "="$  OR  $\$IC50\$ > 999$  OR  $\$IC50\$ < 10 \Rightarrow TRUE$
- Sort ascending and remove duplicates
- DefGood scanned between 5 and 35 nM
- 80-20 split for both actives and inactives
- NBN – ECFP4 used Classifier where Prediction was Active = True
- Resulted in 277 compounds after cleaning

# <5 nM DefGood in TYRO3

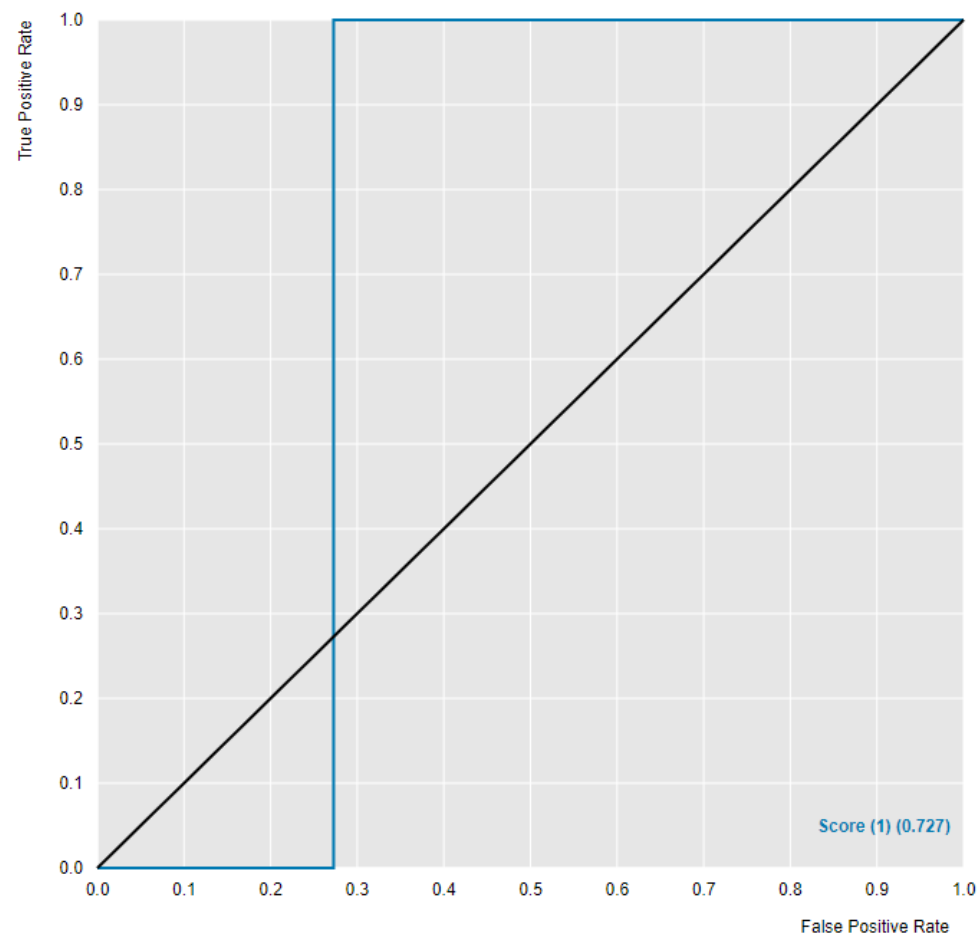

N=56

● Score (1) ● random

Top 10% Mean  
IC50

61.0 nM

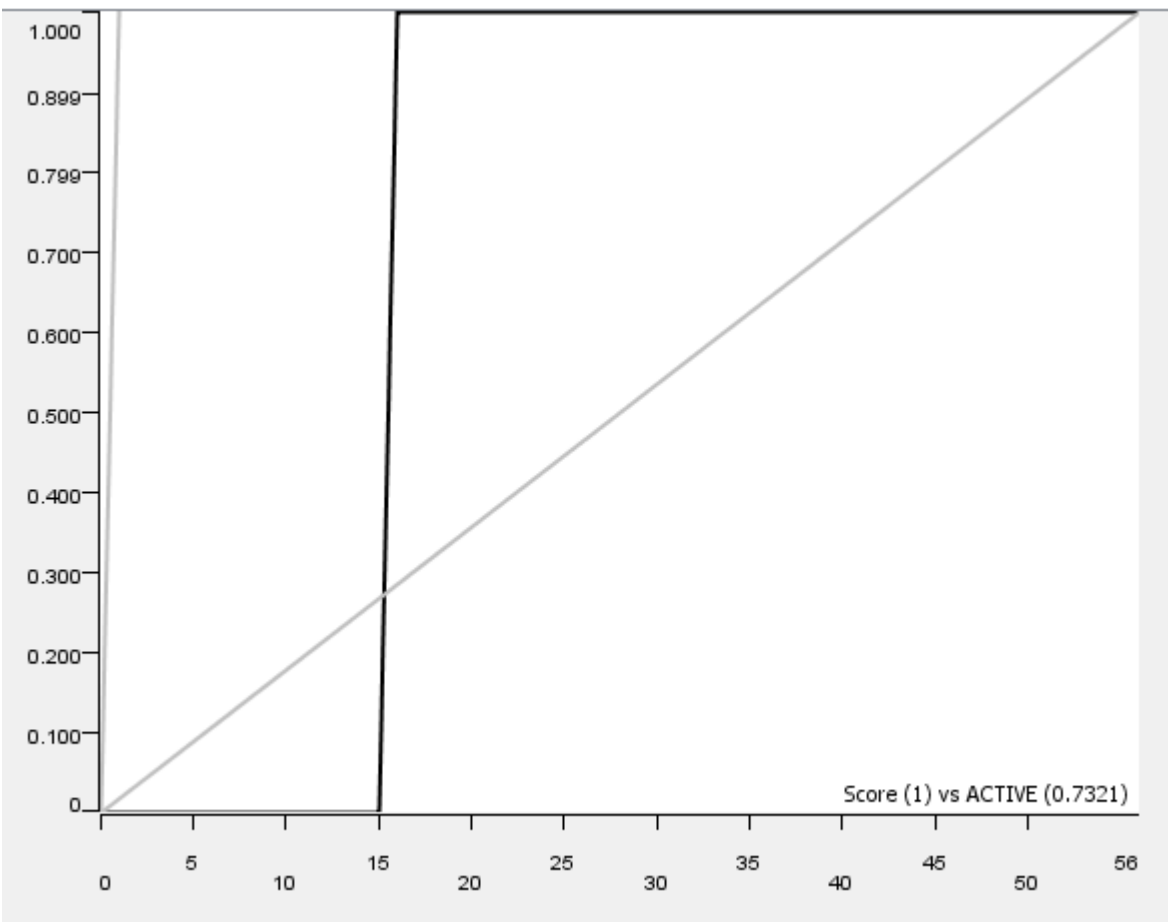

|          | Predicted Active | Predicted Inactive |
|----------|------------------|--------------------|
| Active   | 0                | 1                  |
| Inactive | 1                | 54                 |

# <10 nM DefGood in TYRO3

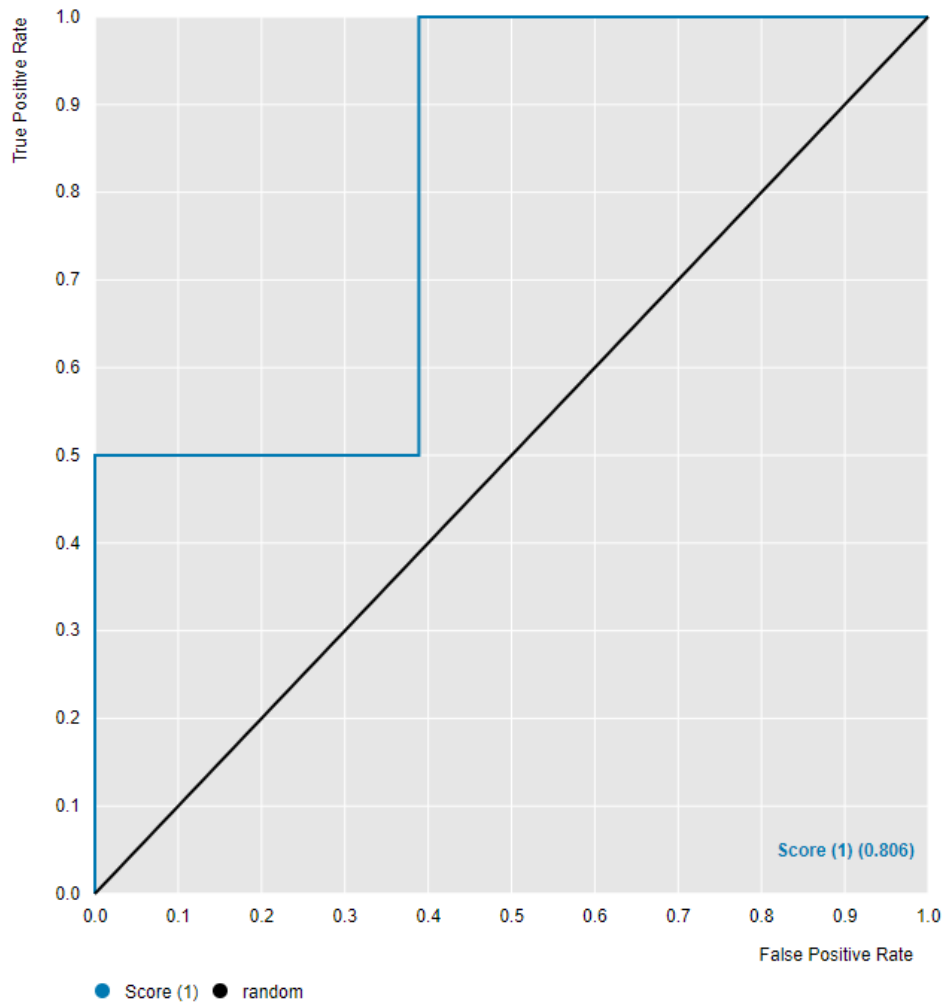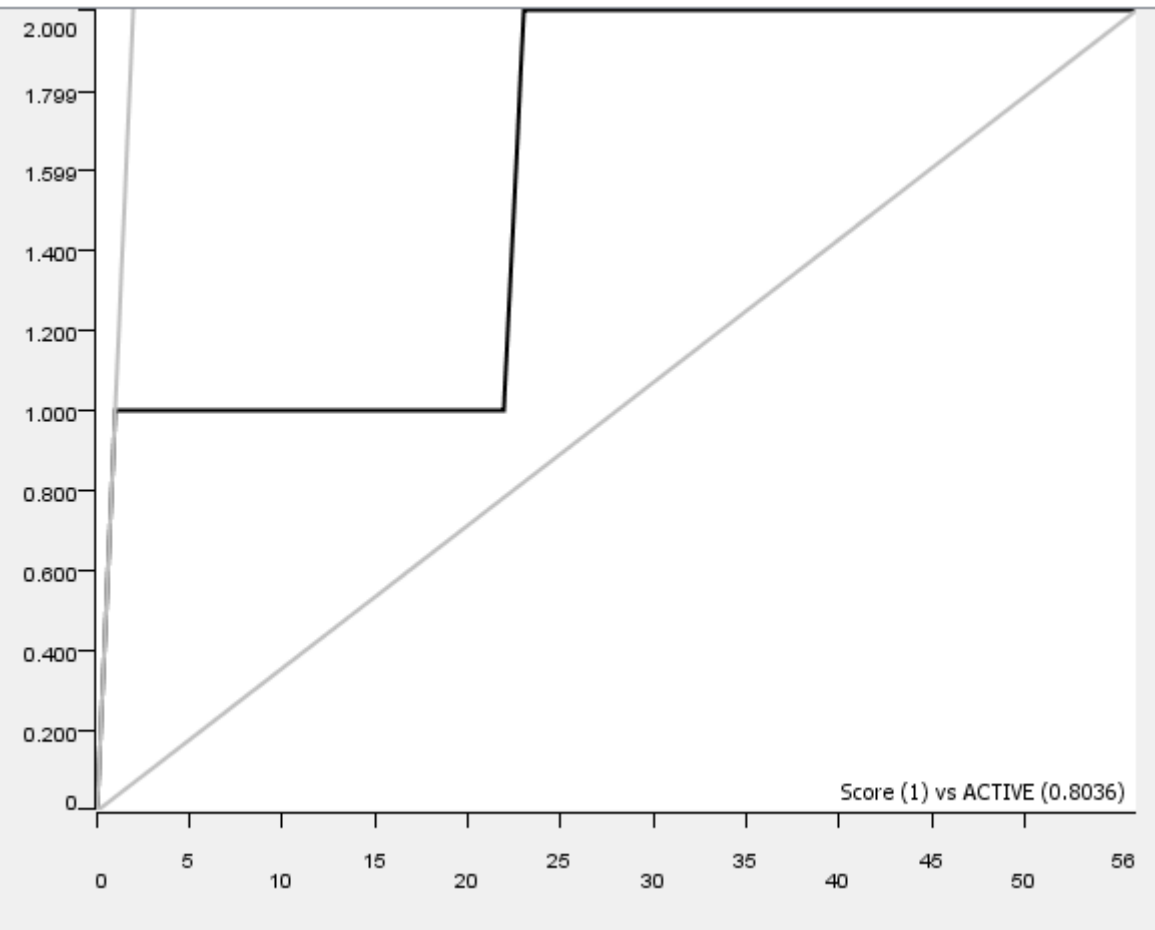

N=56

|                      |        |
|----------------------|--------|
| Top 10% Mean<br>IC50 | 109 nM |
|----------------------|--------|

|          | Predicted Active | Predicted Inactive |
|----------|------------------|--------------------|
| Active   | 1                | 1                  |
| Inactive | 18               | 36                 |

# <15 nM DefGood in TYRO3

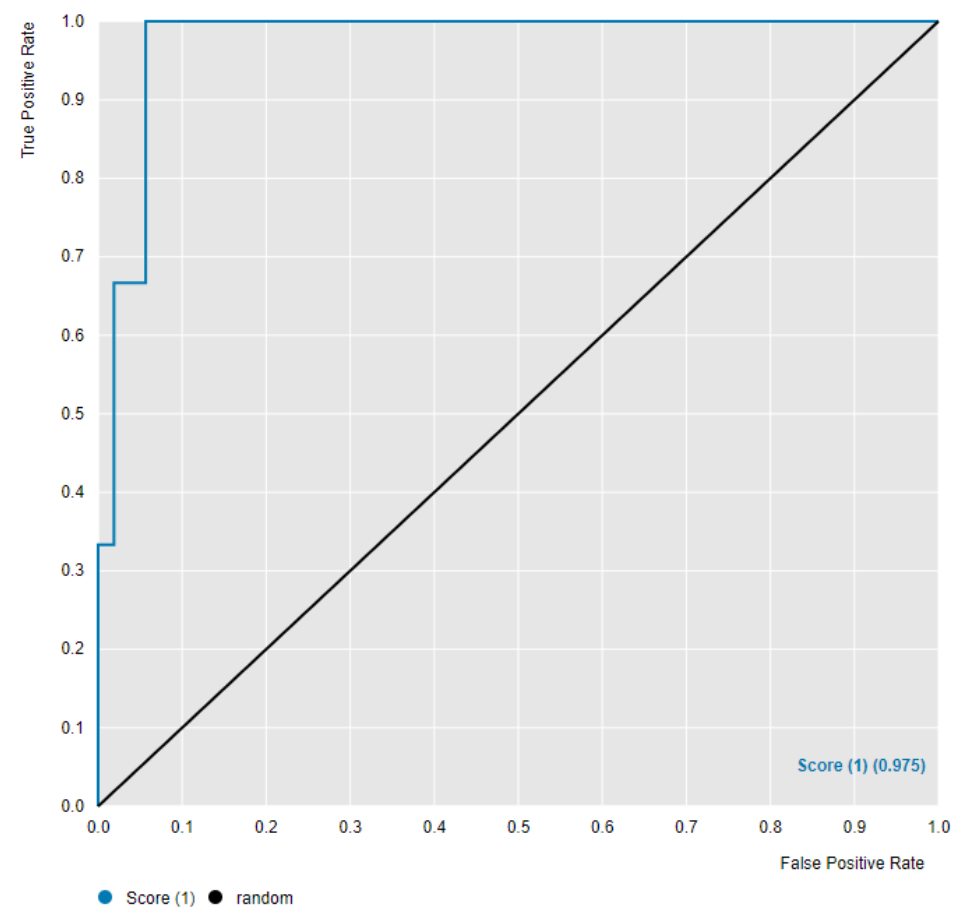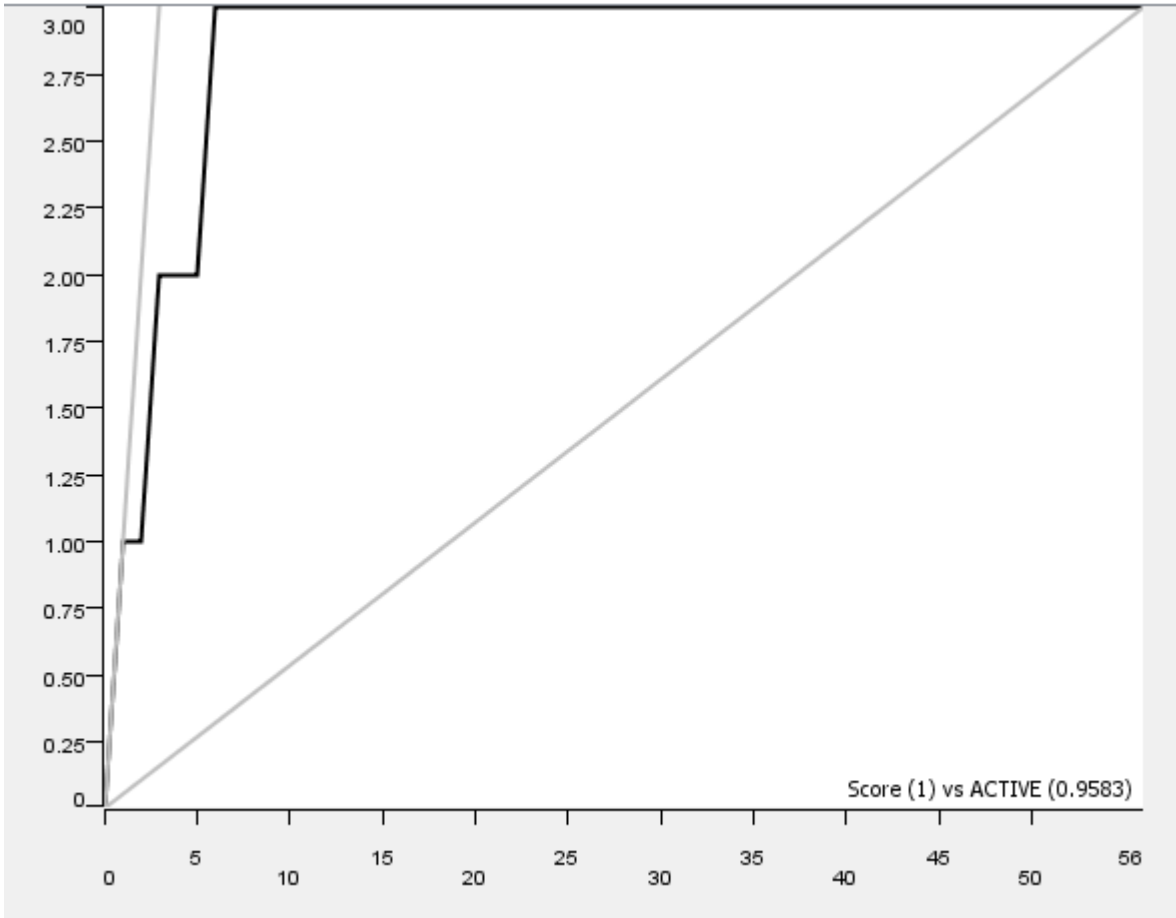

N=56

|                   |         |
|-------------------|---------|
| Top 10% Mean IC50 | 87.4 nM |
|-------------------|---------|

|          | Predicted Active | Predicted Inactive |
|----------|------------------|--------------------|
| Active   | 3                | 0                  |
| Inactive | 4                | 49                 |



# <20 nM DefGood in TYRO3

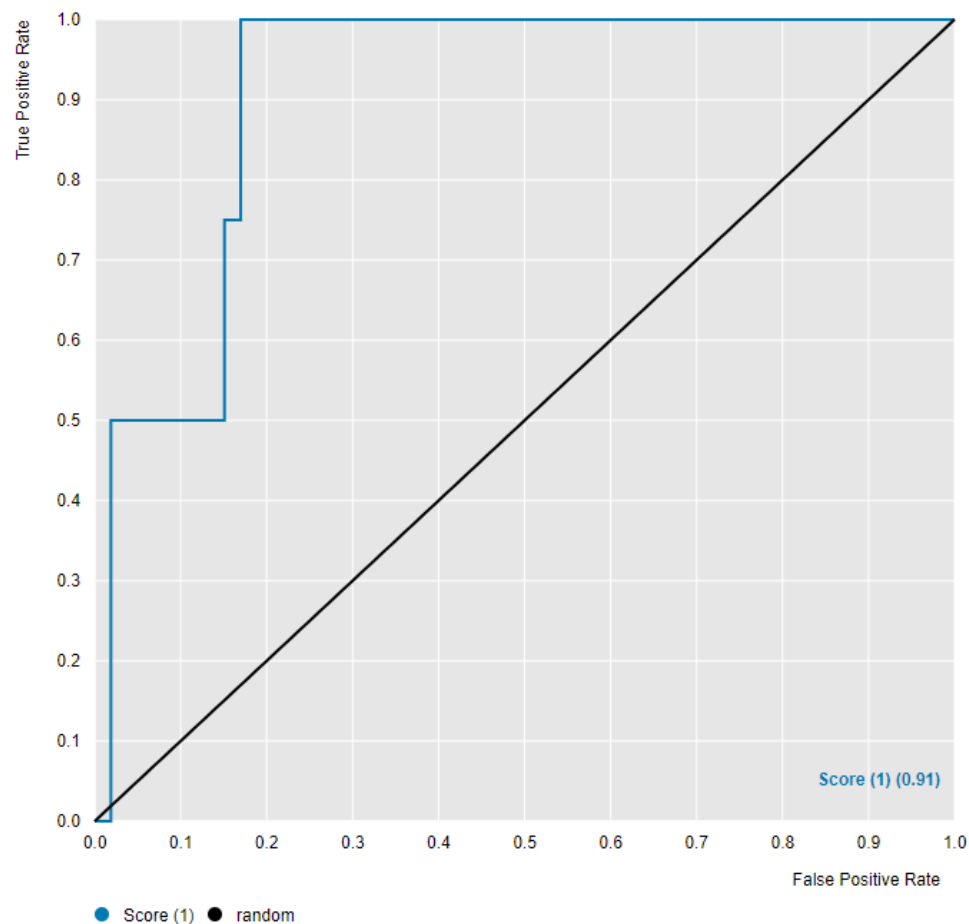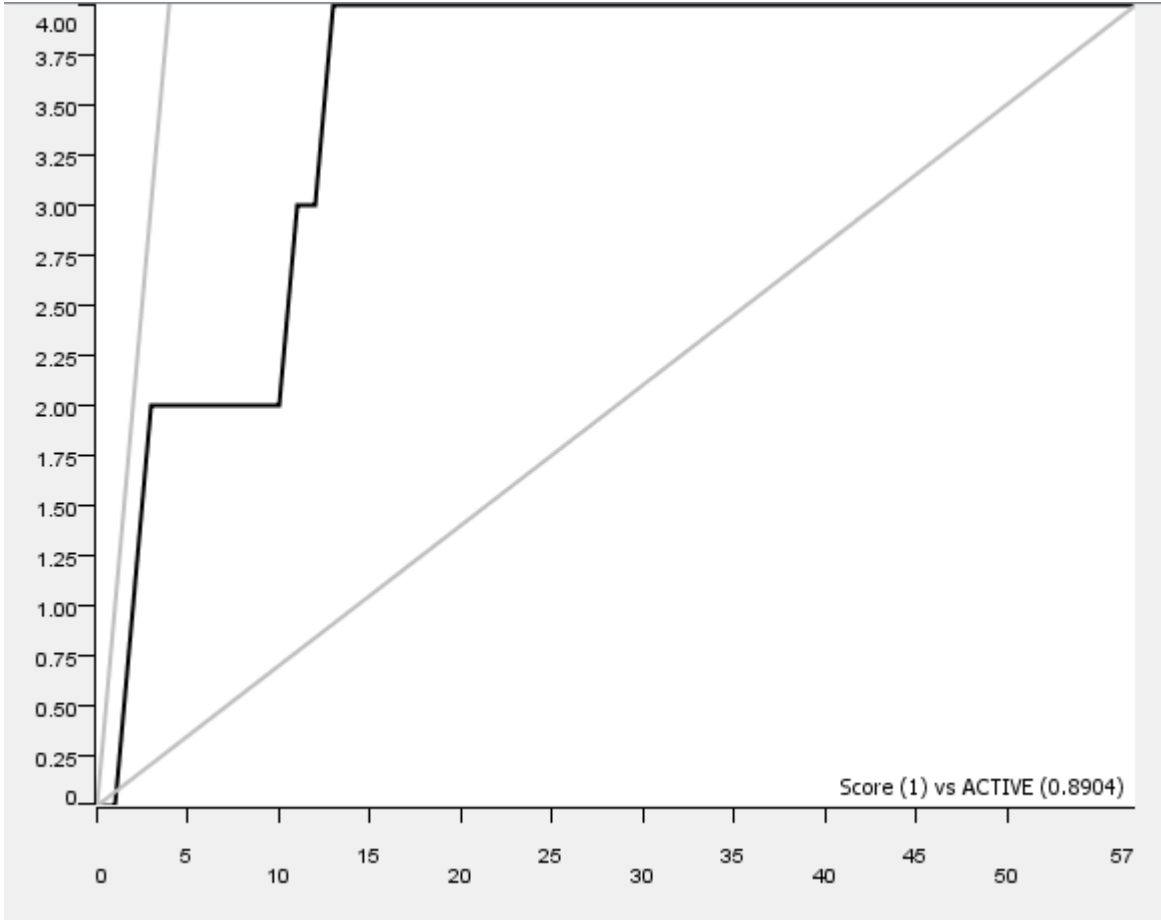

N=56

|                   |         |
|-------------------|---------|
| Top 10% Mean IC50 | 54.8 nM |
|-------------------|---------|

|          | Predicted Active | Predicted Inactive |
|----------|------------------|--------------------|
| Active   | 4                | 0                  |
| Inactive | 10               | 43                 |

# <25 nM DefGood in TYRO3

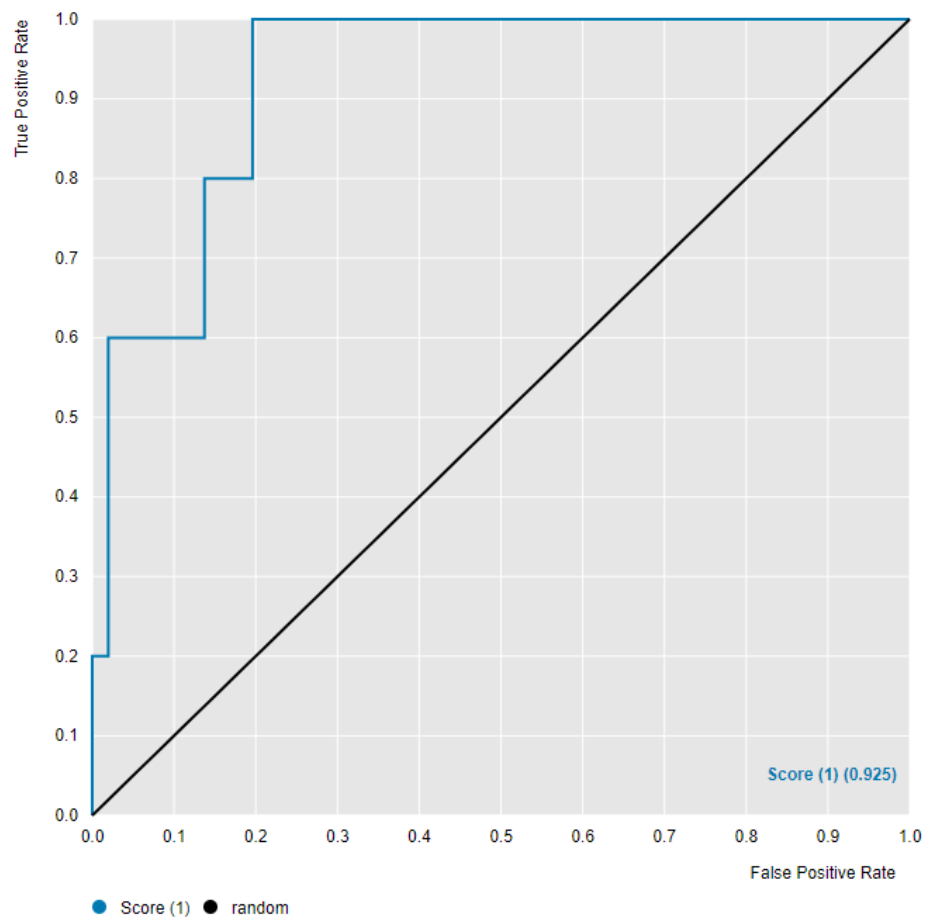

N=56

| Top 10% Mean IC50 | 54.7 nM |
|-------------------|---------|
|-------------------|---------|

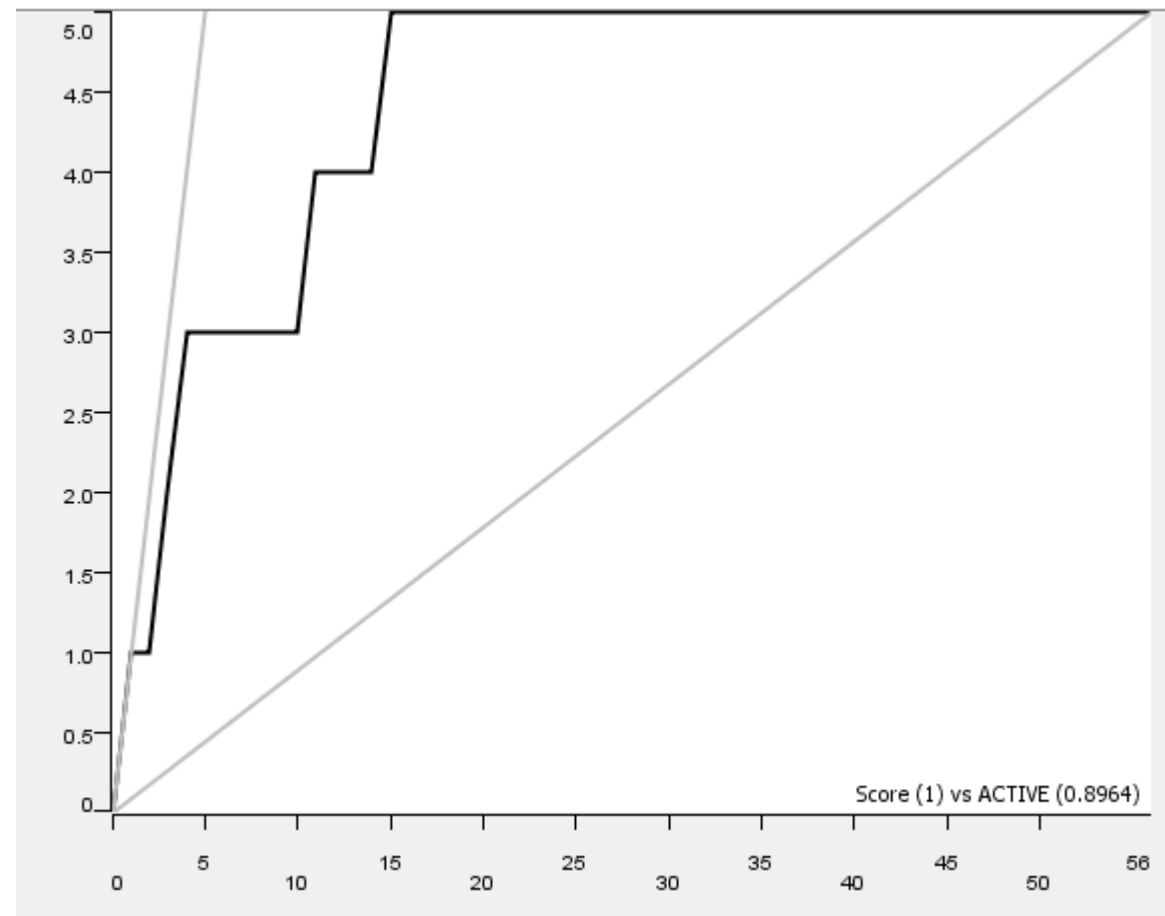

|          | Predicted Active | Predicted Inactive |
|----------|------------------|--------------------|
| Active   | 5                | 0                  |
| Inactive | 16               | 35                 |

# <35 nM DefGood in TYRO3

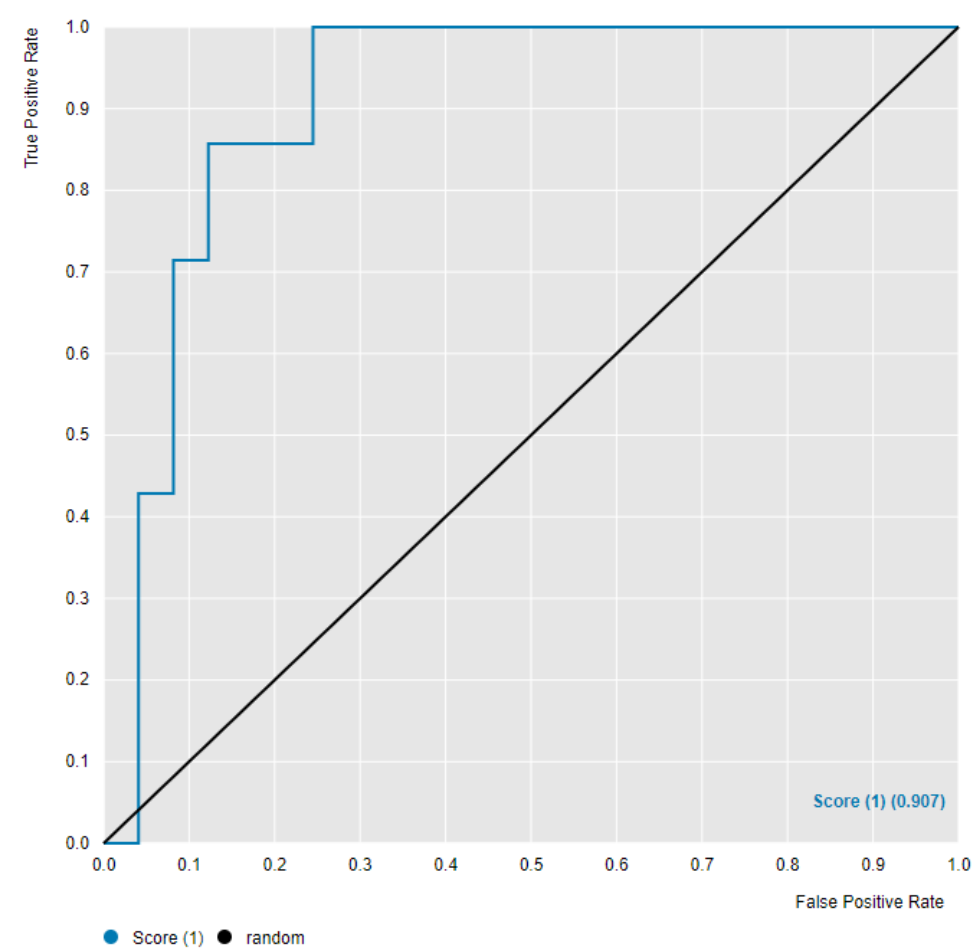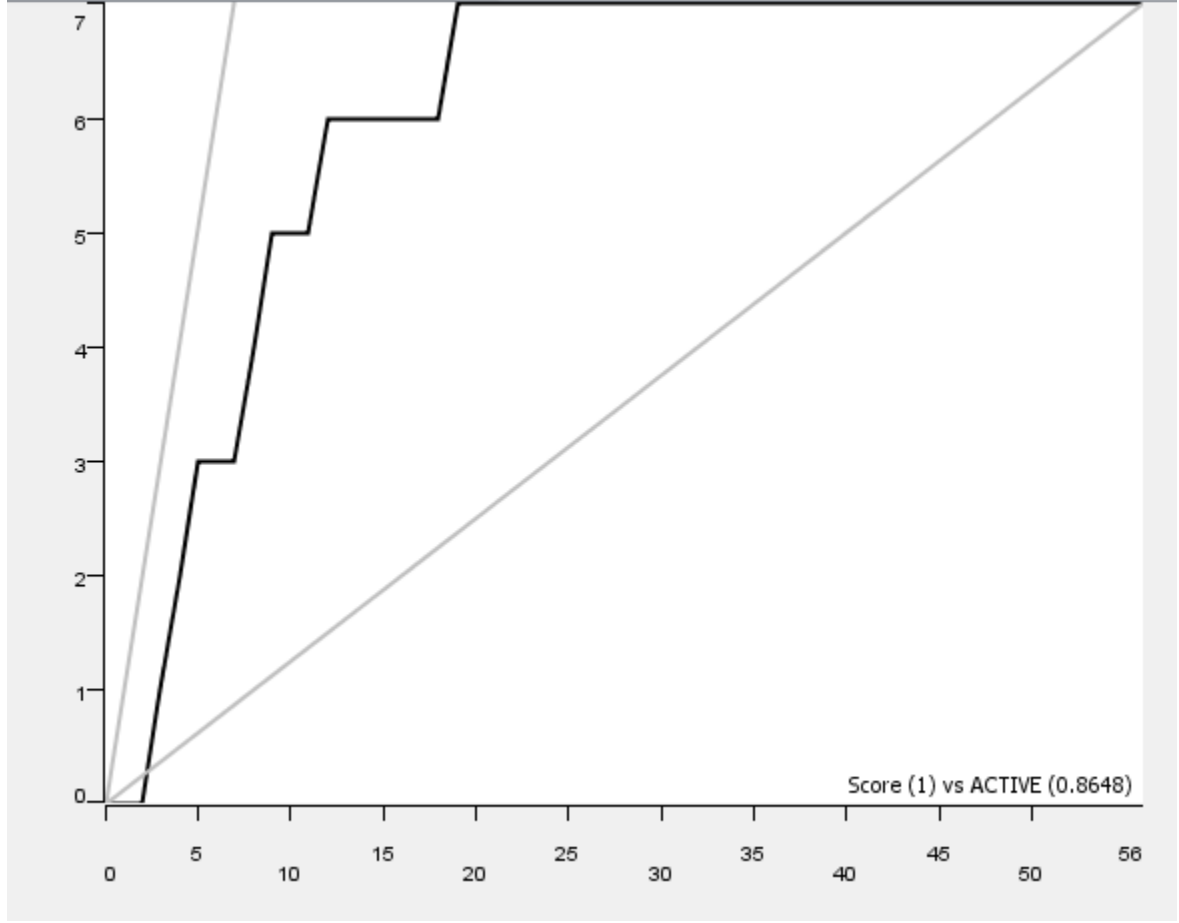

N=56

|                   |         |
|-------------------|---------|
| Top 10% Mean IC50 | 48.6 nM |
|-------------------|---------|

|          | Predicted Active | Predicted Inactive |
|----------|------------------|--------------------|
| Active   | 7                | 0                  |
| Inactive | 16               | 33                 |

# Decision on DefGood

- <25 nM has the best performance with regard to enrichment and mean top 10% IC50.

# RF - <25 nM DefGood in TYRO3

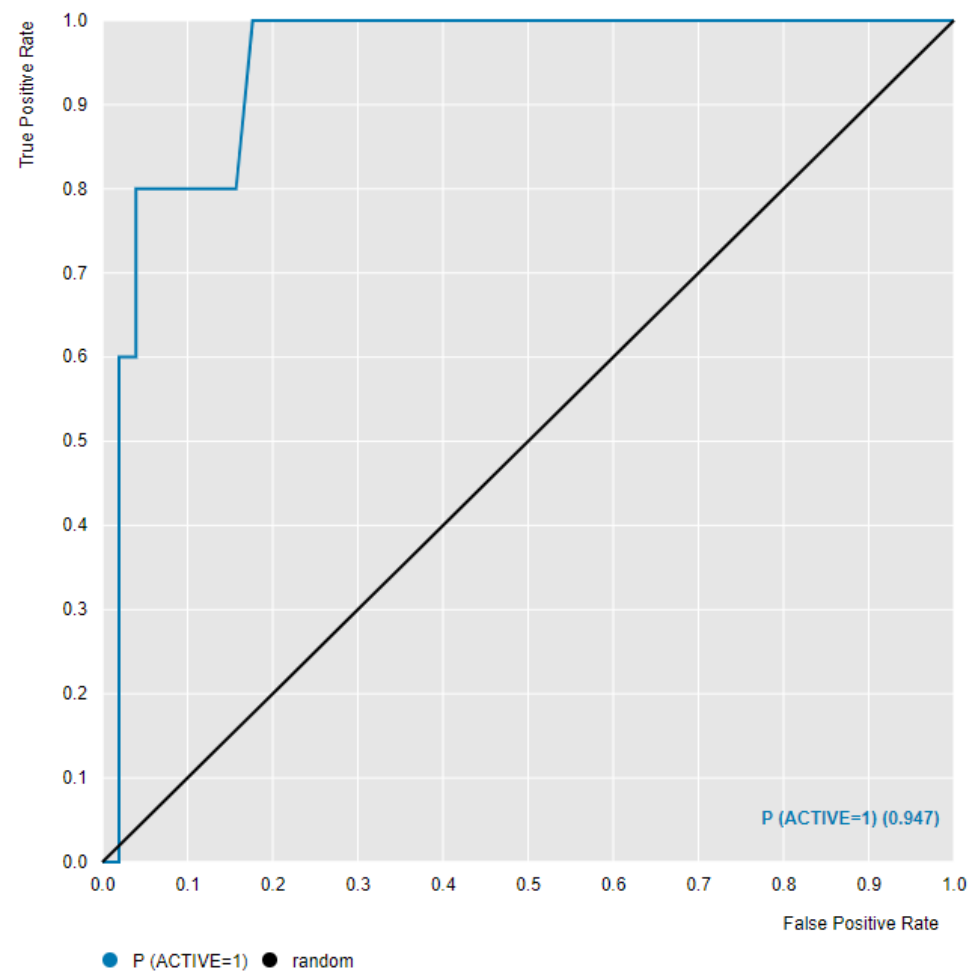

N=56

| Top 10% Mean IC50 | 16.5 nM |
|-------------------|---------|
|-------------------|---------|

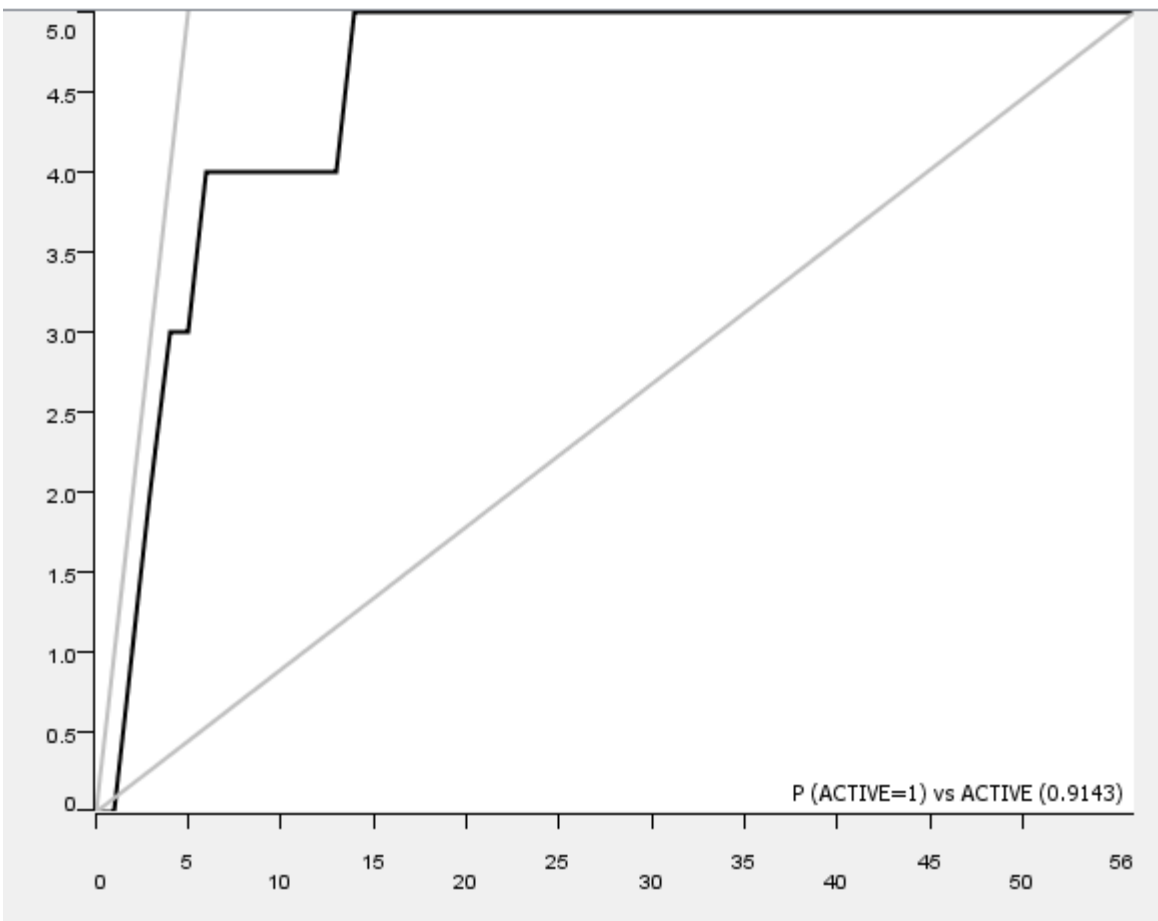

|          | Predicted Active | Predicted Inactive |
|----------|------------------|--------------------|
| Active   | 3                | 2                  |
| Inactive | 2                | 49                 |

# Decision on DefGood - RF

- Work in ALK showed DefGood in the NBN was similar to DefGood in an RF. Therefore, this value for DefGood from the NBN design was used as DefGood.

# PNN - <25 nM DefGood in TYRO3

- Properties List (46 calculatable properties were used)
- Parameterization (Global Accuracy for Activity at a 25 nM decision value was used, and a 5-fold stratified sampling cross validation was used to parameterize theta minus and theta plus) Theta Minus = 0.75 and Theta Plus = 0.05. This parameterization is not allowed in the PNN algorithm, and PNN was not used as a result

# NBN Error Tolerance- <25 nM DefGood in TYRO3

- 0-50% absolute error



<25 nM DefGood in TYRO3, 5% error;  
Random seed = 1515533876005

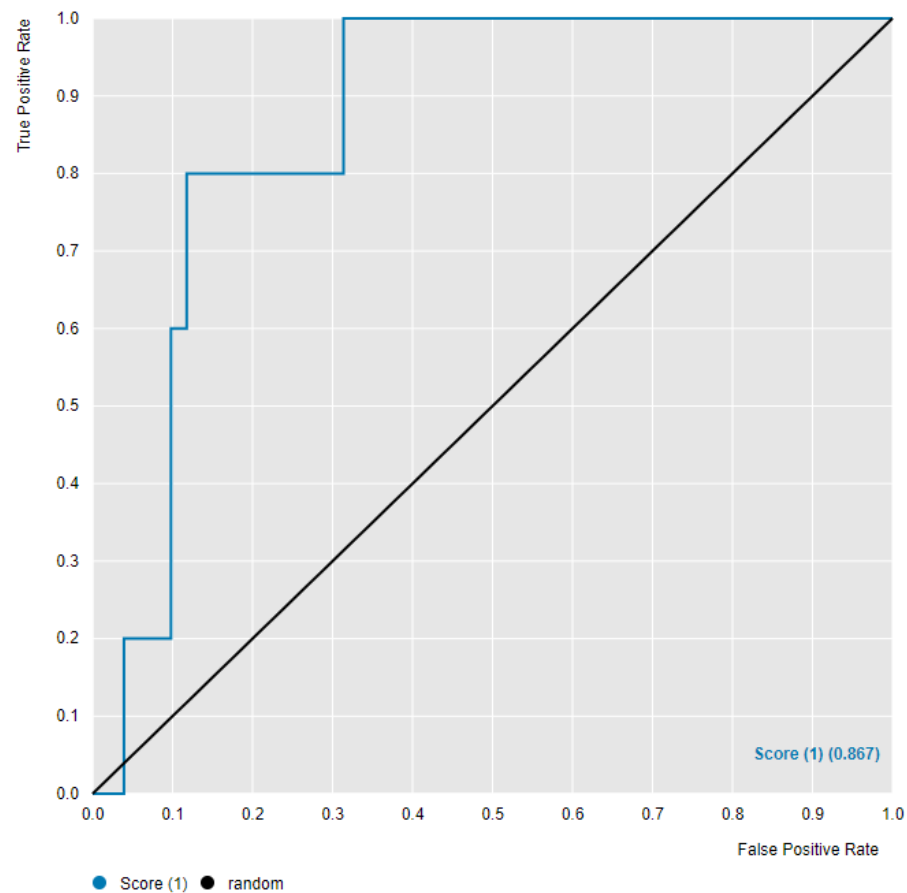

N=56

|                   |         |
|-------------------|---------|
| Top 10% Mean IC50 | 45.2 nM |
|-------------------|---------|

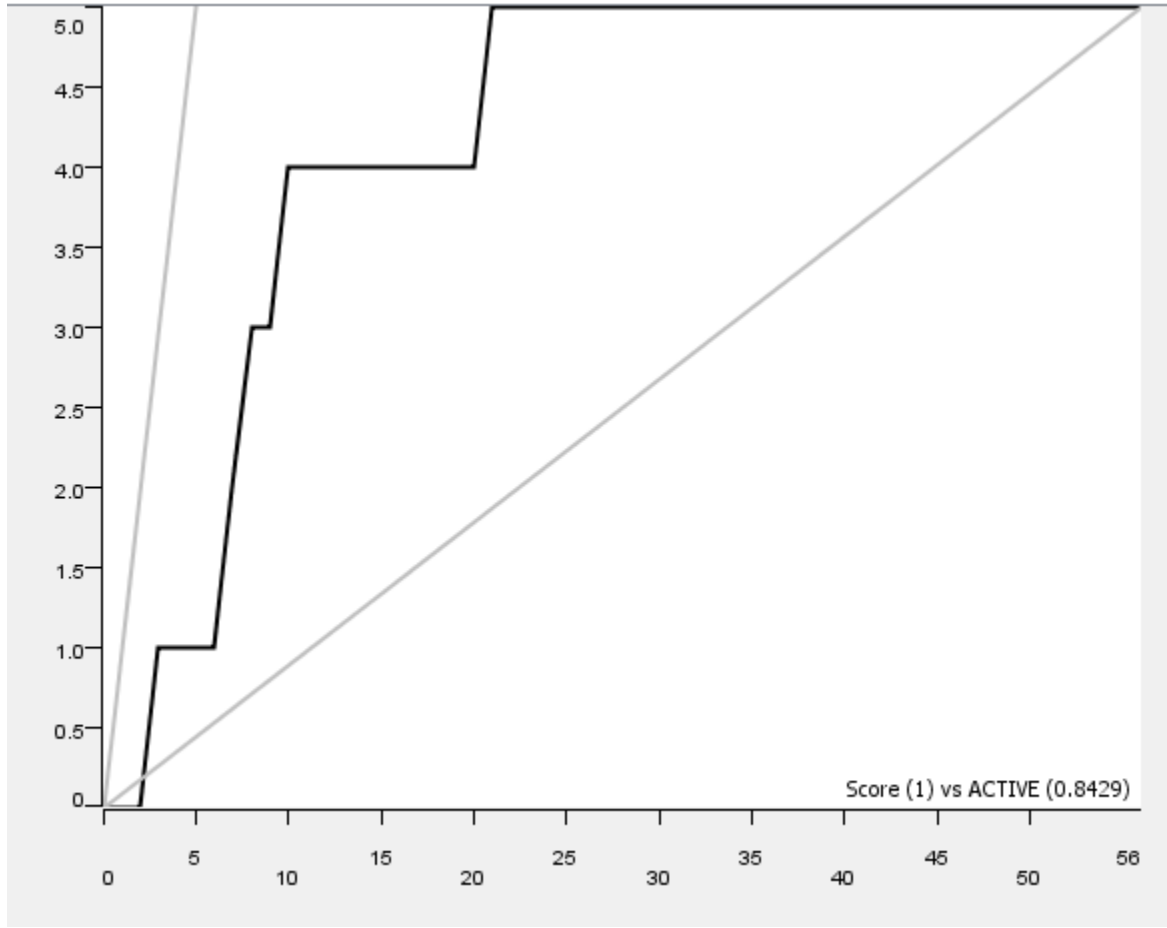

|          | Predicted Active | Predicted Inactive |
|----------|------------------|--------------------|
| Active   | 5                | 0                  |
| Inactive | 16               | 35                 |

<25 nM DefGood in TYRO3, 10% error;  
Random seed = 1515533876005

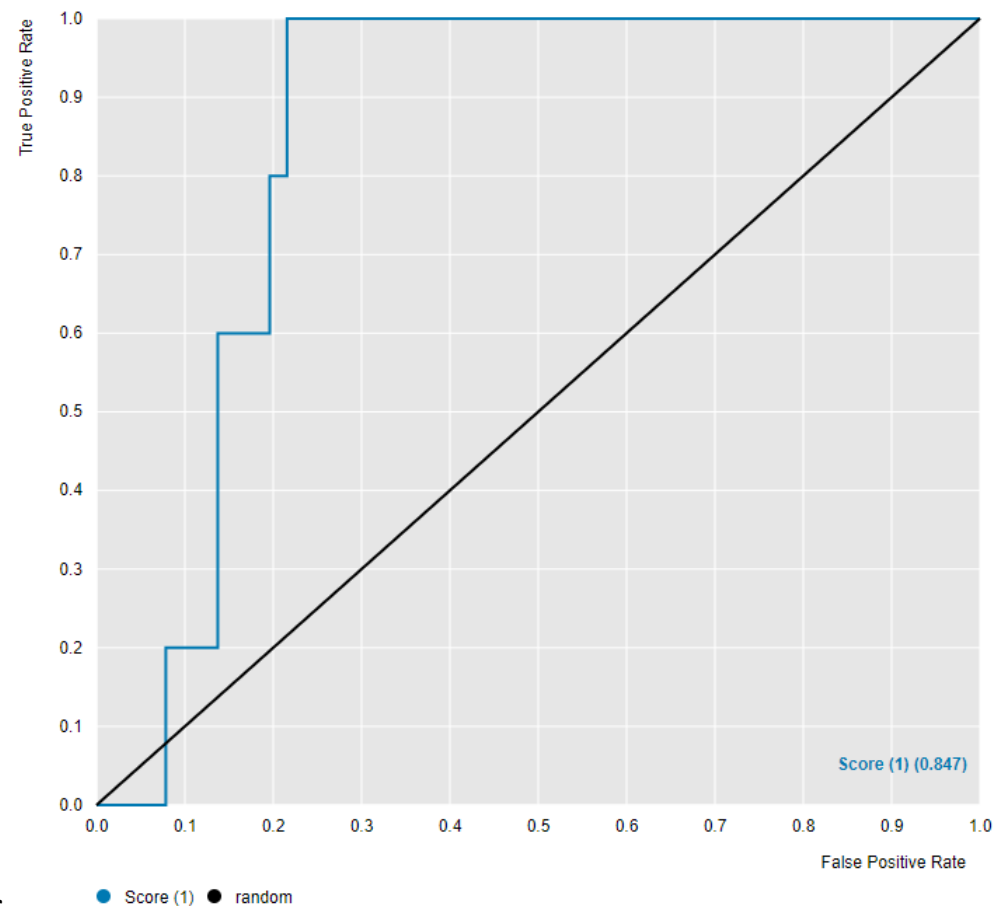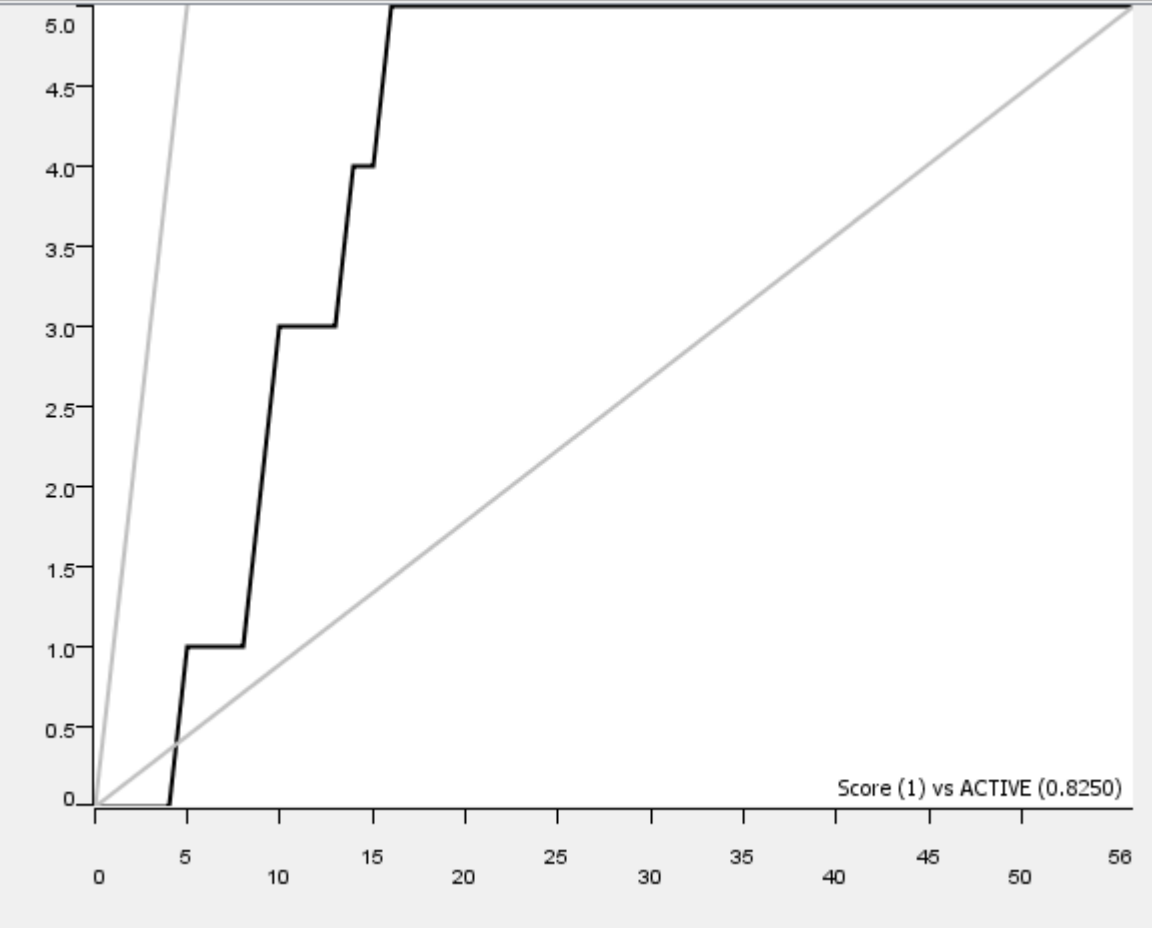

N=56

|                   |         |
|-------------------|---------|
| Top 10% Mean IC50 | 39.1 nM |
|-------------------|---------|

|          | Predicted Active | Predicted Inactive |
|----------|------------------|--------------------|
| Active   | 5                | 0                  |
| Inactive | 23               | 28                 |

<25 nM DefGood in TYRO3, 15% error;

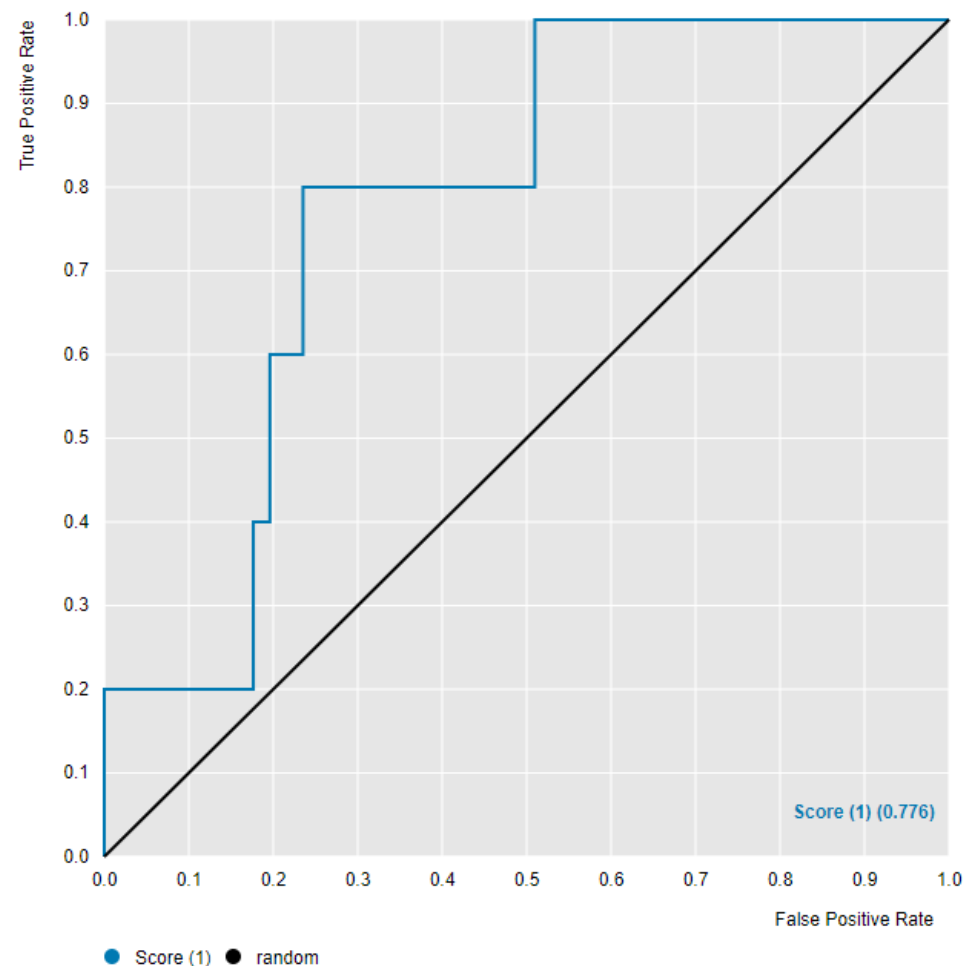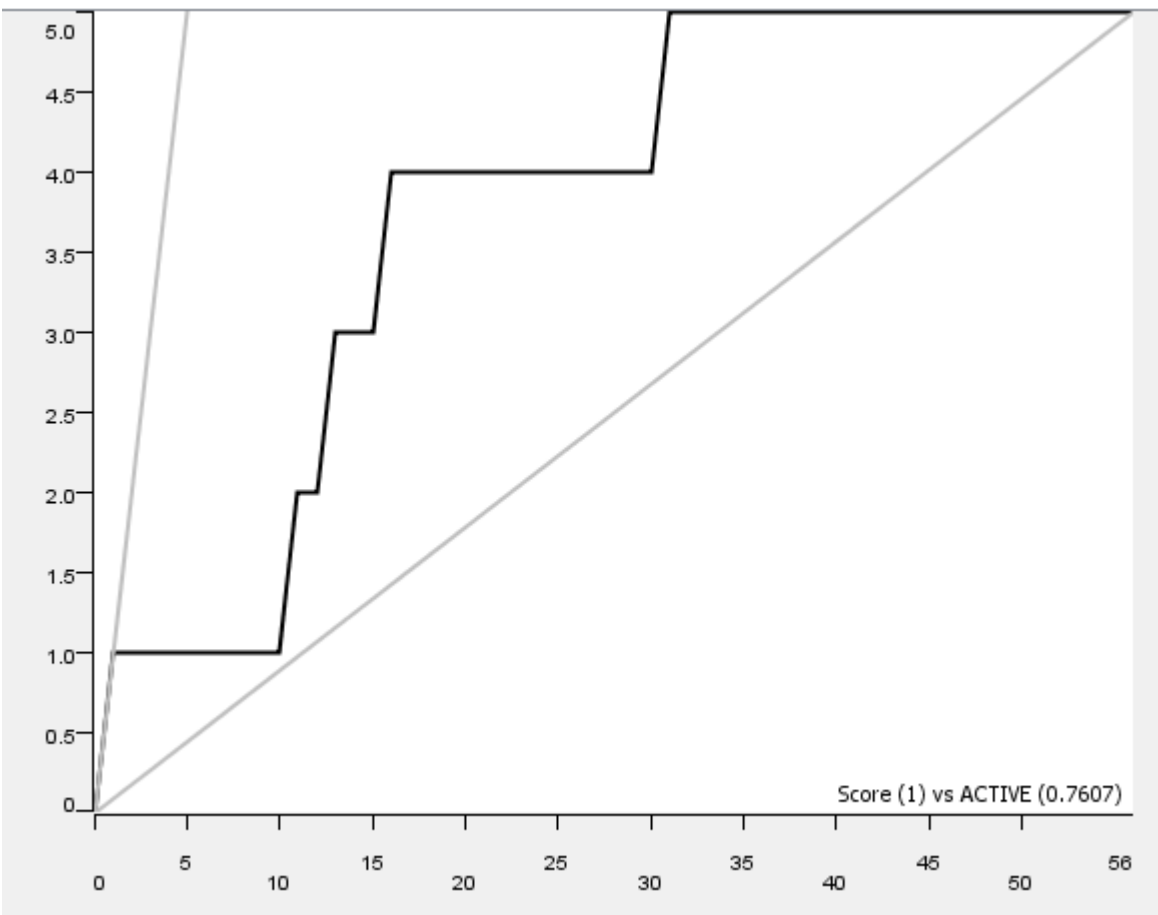

N=56

|                   |         |
|-------------------|---------|
| Top 10% Mean IC50 | 39.1 nM |
|-------------------|---------|

|          | Predicted Active | Predicted Inactive |
|----------|------------------|--------------------|
| Active   | 4                | 1                  |
| Inactive | 18               | 33                 |

<25 nM DefGood in TYRO3, 20% error;

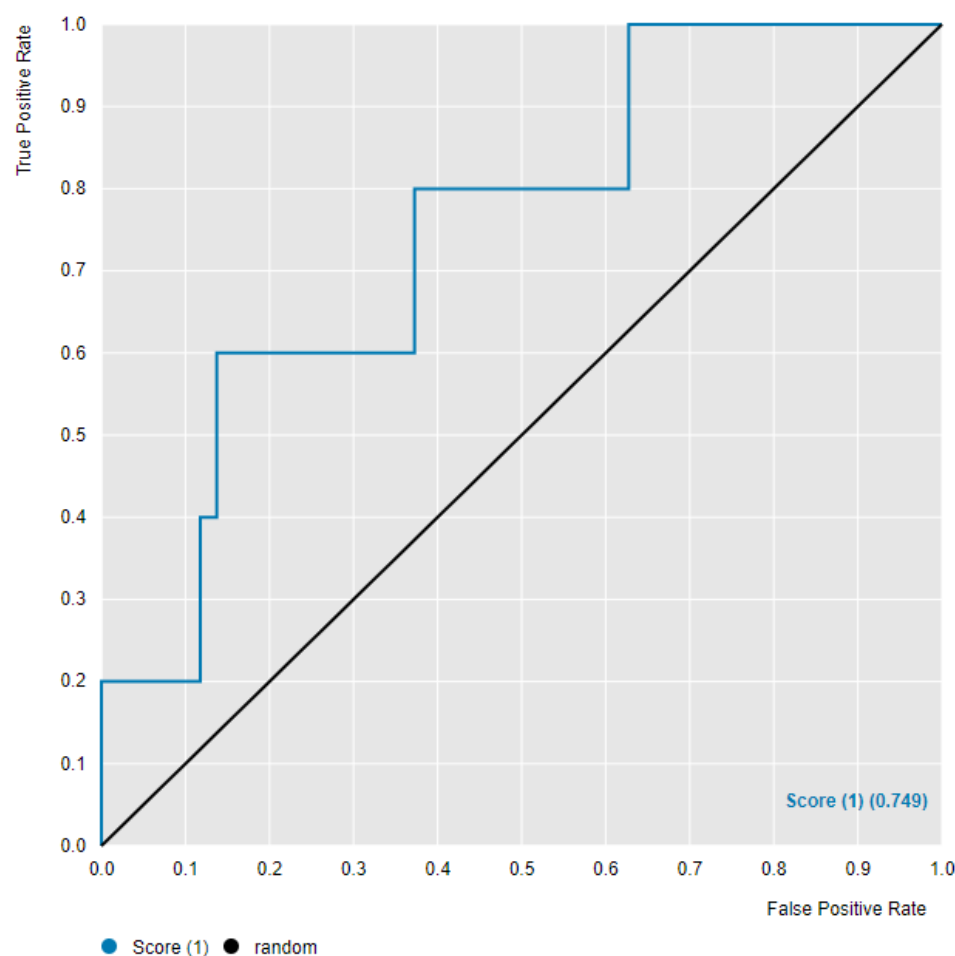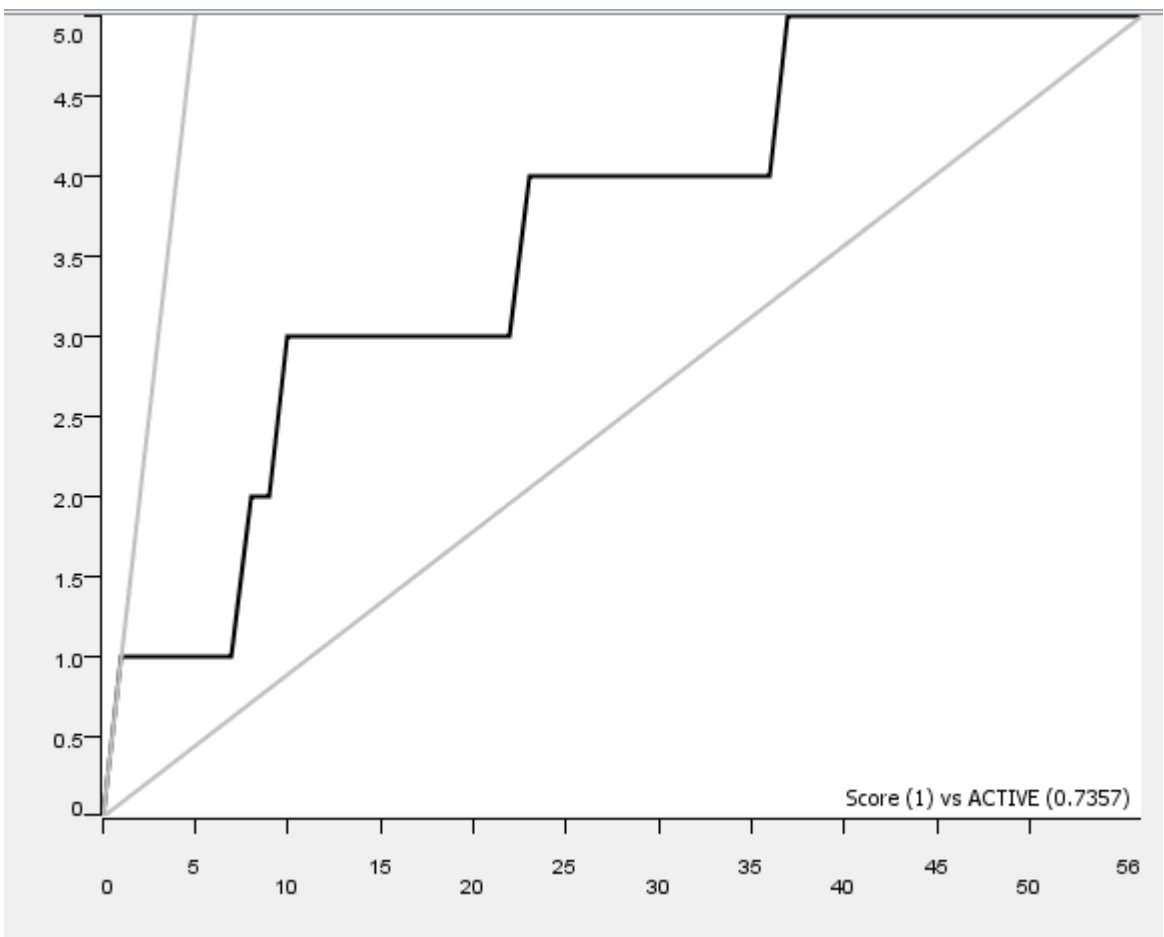

N=56

|                   |         |
|-------------------|---------|
| Top 10% Mean IC50 | 39.1 nM |
|-------------------|---------|

|          | Predicted Active | Predicted Inactive |
|----------|------------------|--------------------|
| Active   | 4                | 1                  |
| Inactive | 22               | 29                 |

<25 nM DefGood in TYRO3, 25% error;

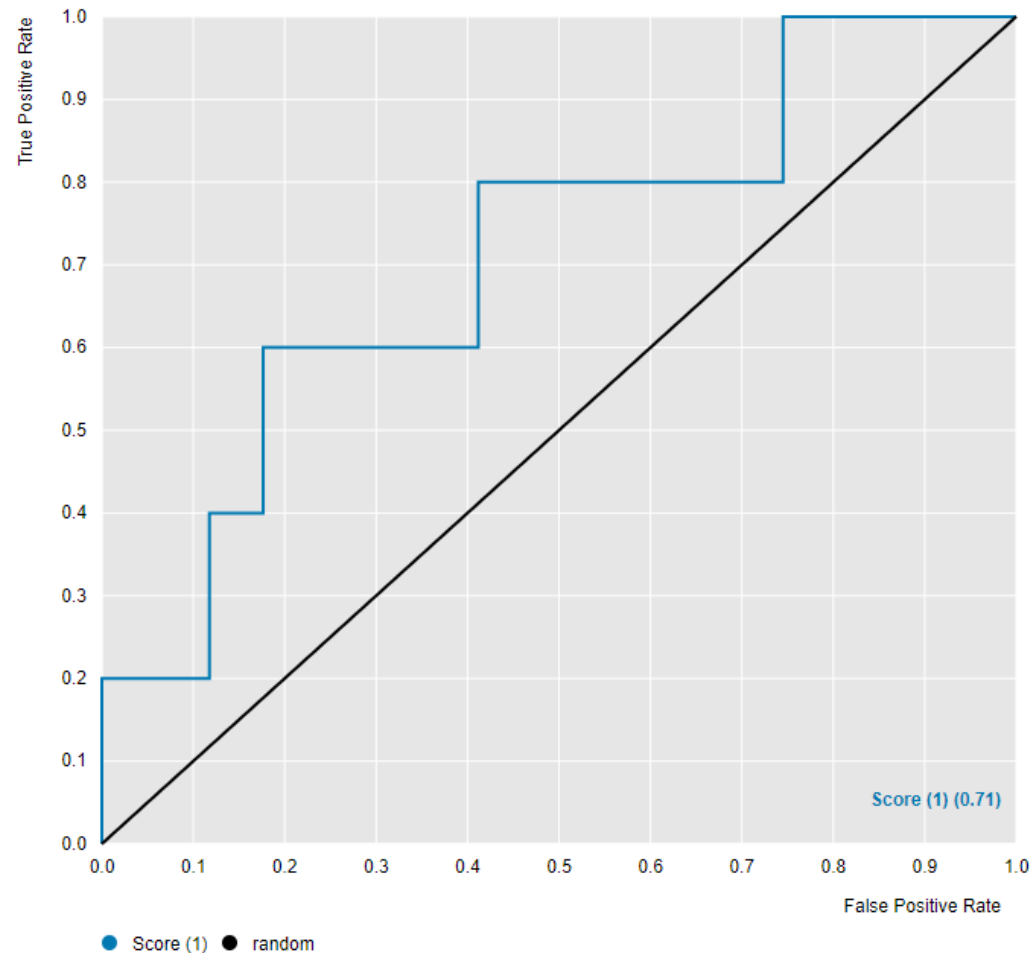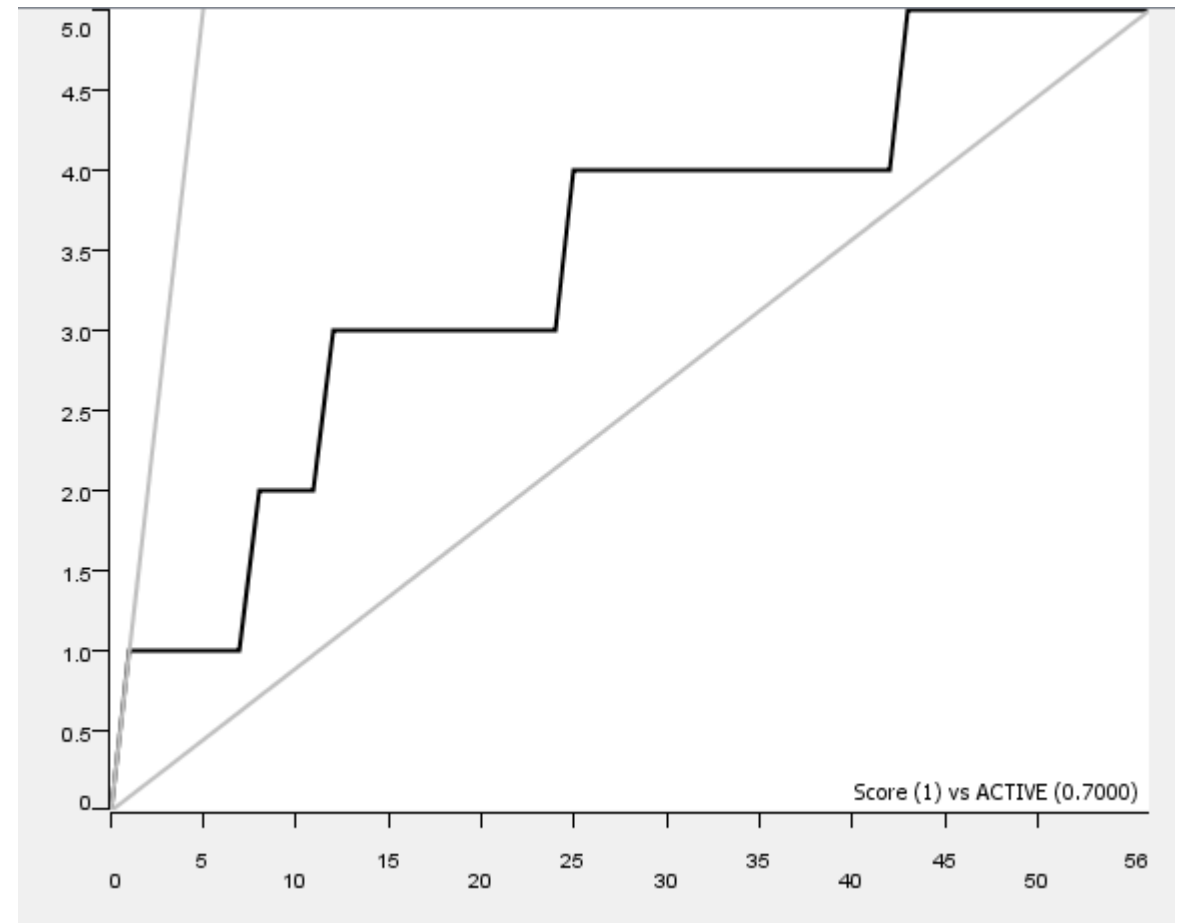

N=56

|                   |         |
|-------------------|---------|
| Top 10% Mean IC50 | 39.1 nM |
|-------------------|---------|

|          | Predicted Active | Predicted Inactive |
|----------|------------------|--------------------|
| Active   | 4                | 1                  |
| Inactive | 22               | 29                 |

<25 nM DefGood in TYRO3, 30% error;

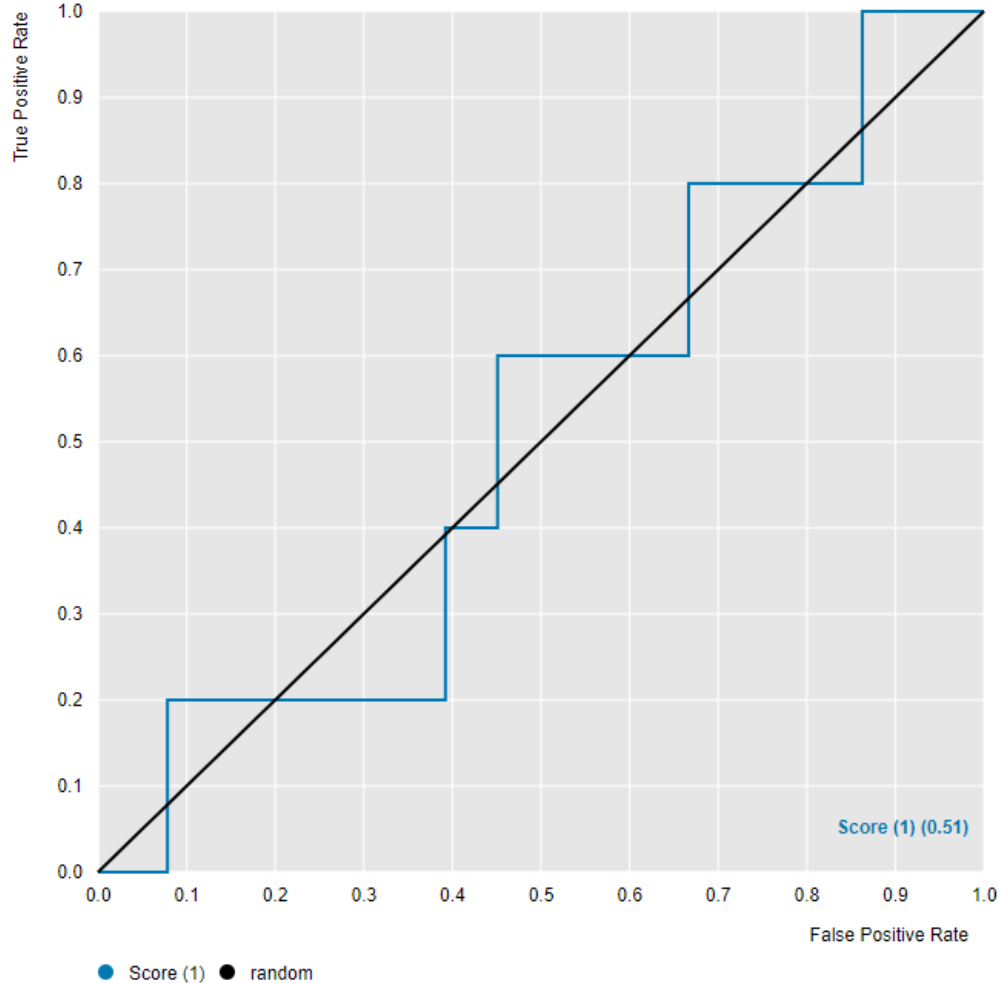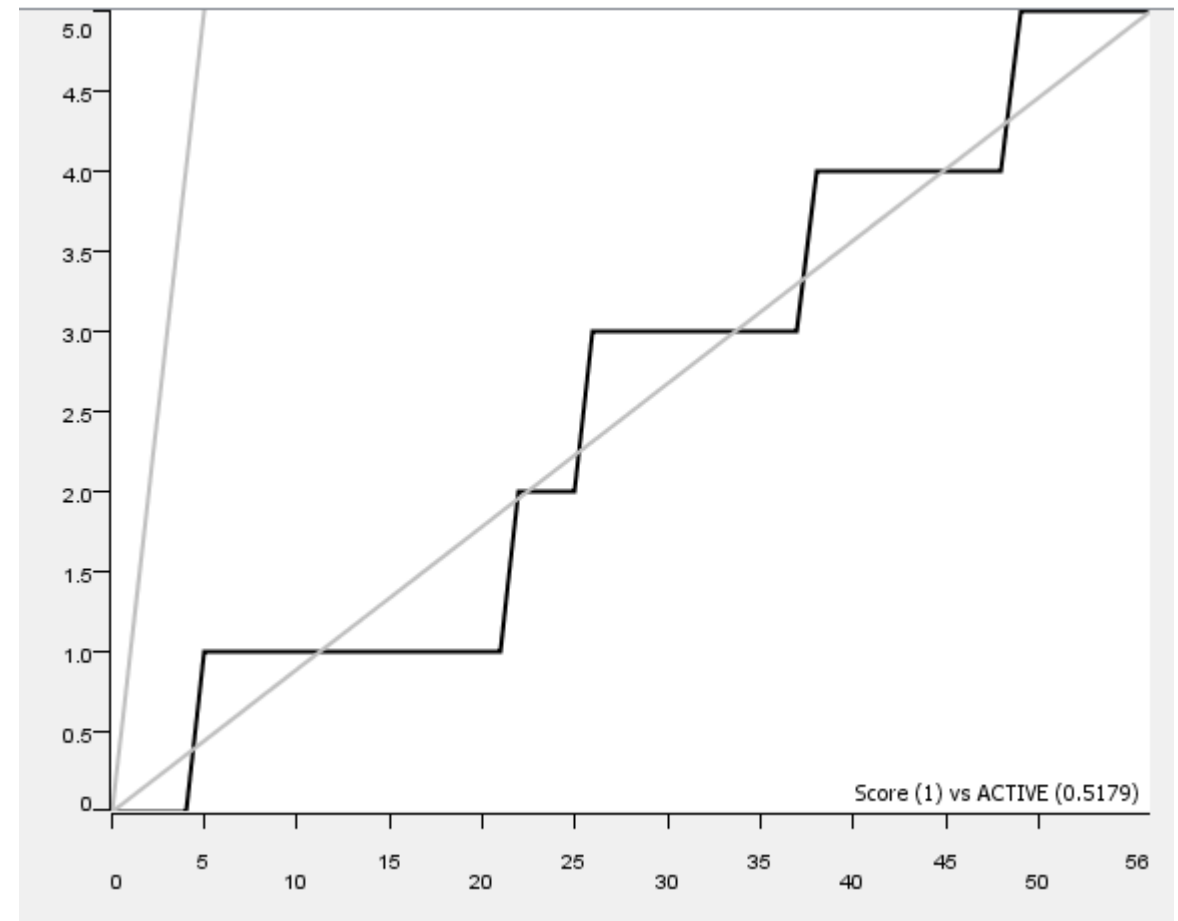

N=56

|                   |         |
|-------------------|---------|
| Top 10% Mean IC50 | 39.1 nM |
|-------------------|---------|

|          | Predicted Active | Predicted Inactive |
|----------|------------------|--------------------|
| Active   | 2                | 3                  |
| Inactive | 23               | 28                 |

<25 nM DefGood in TYRO3, 5% error;  
Random seed = 429

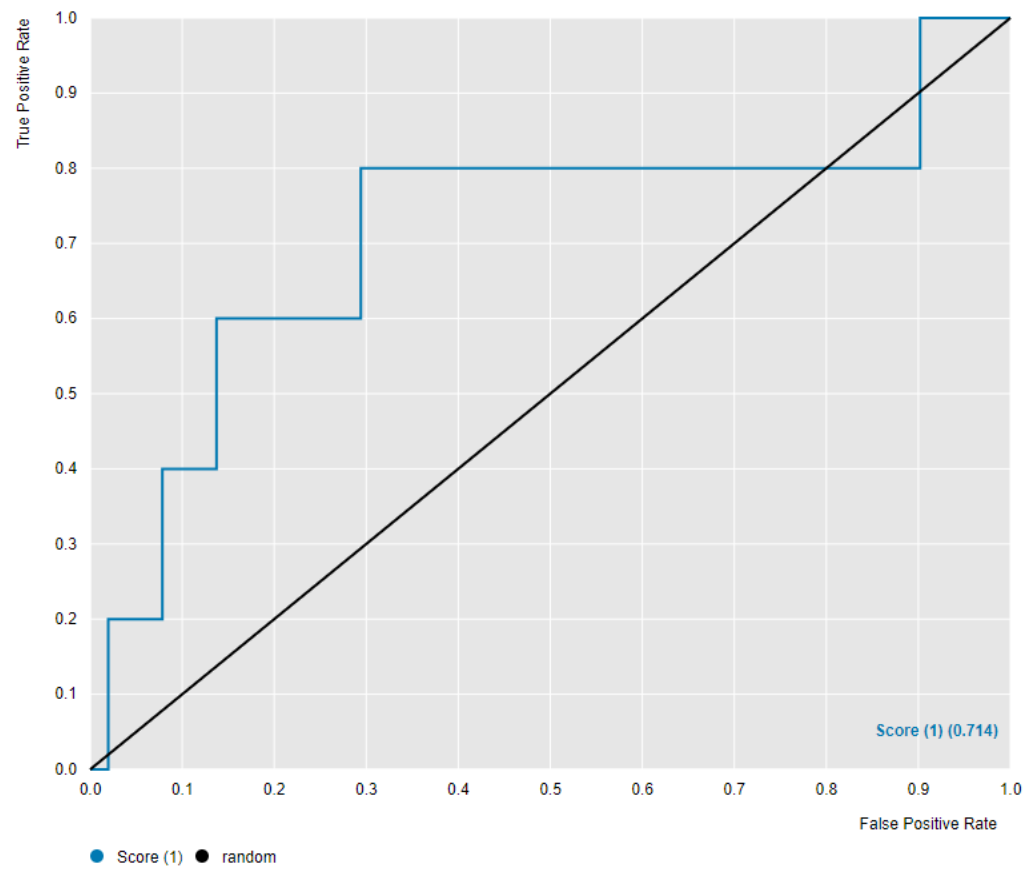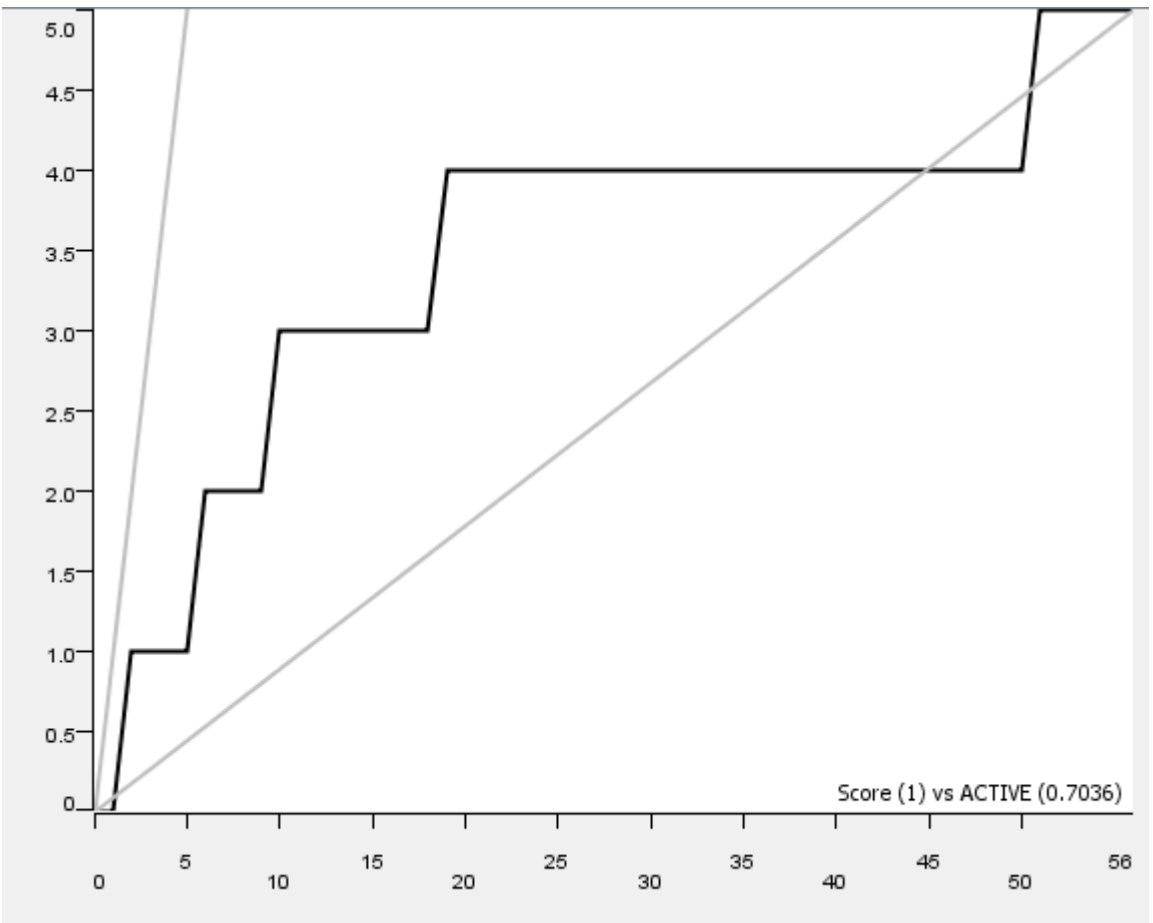

N=56

|                      |        |
|----------------------|--------|
| Top 10% Mean<br>IC50 | 137 nM |
|----------------------|--------|

|          | Predicted Active | Predicted Inactive |
|----------|------------------|--------------------|
| Active   | 2                | 3                  |
| Inactive | 6                | 45                 |

<25nM DefGood in TYRO3, 10% error;  
Random seed = 429

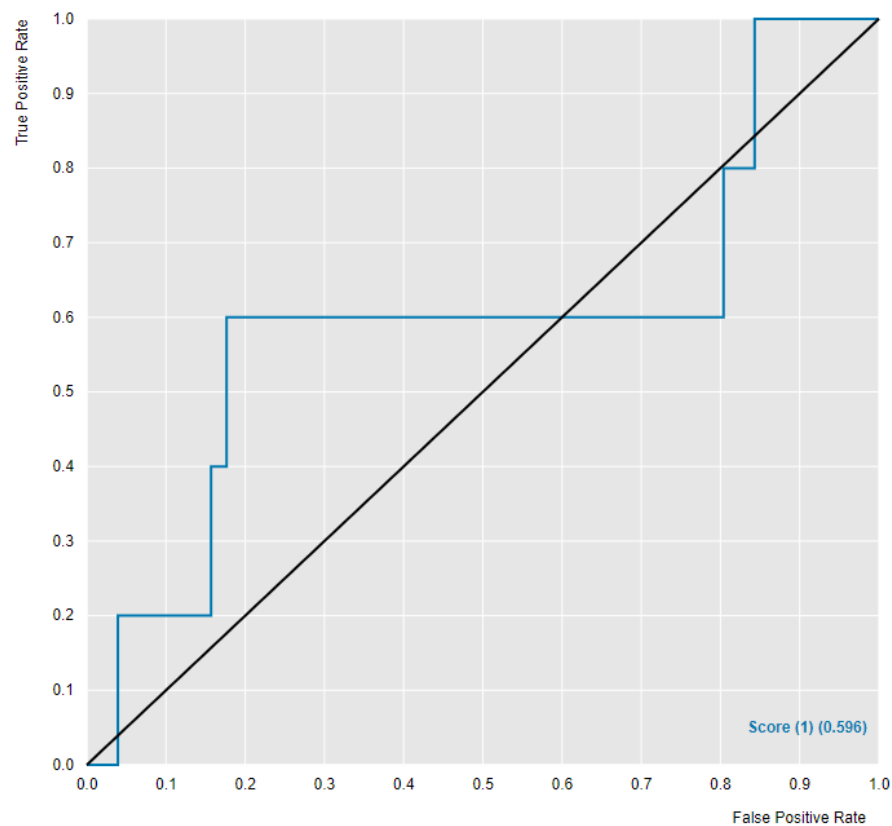

N=56

● Score (1) ● random

Top 10% Mean  
IC50

65.0 nM

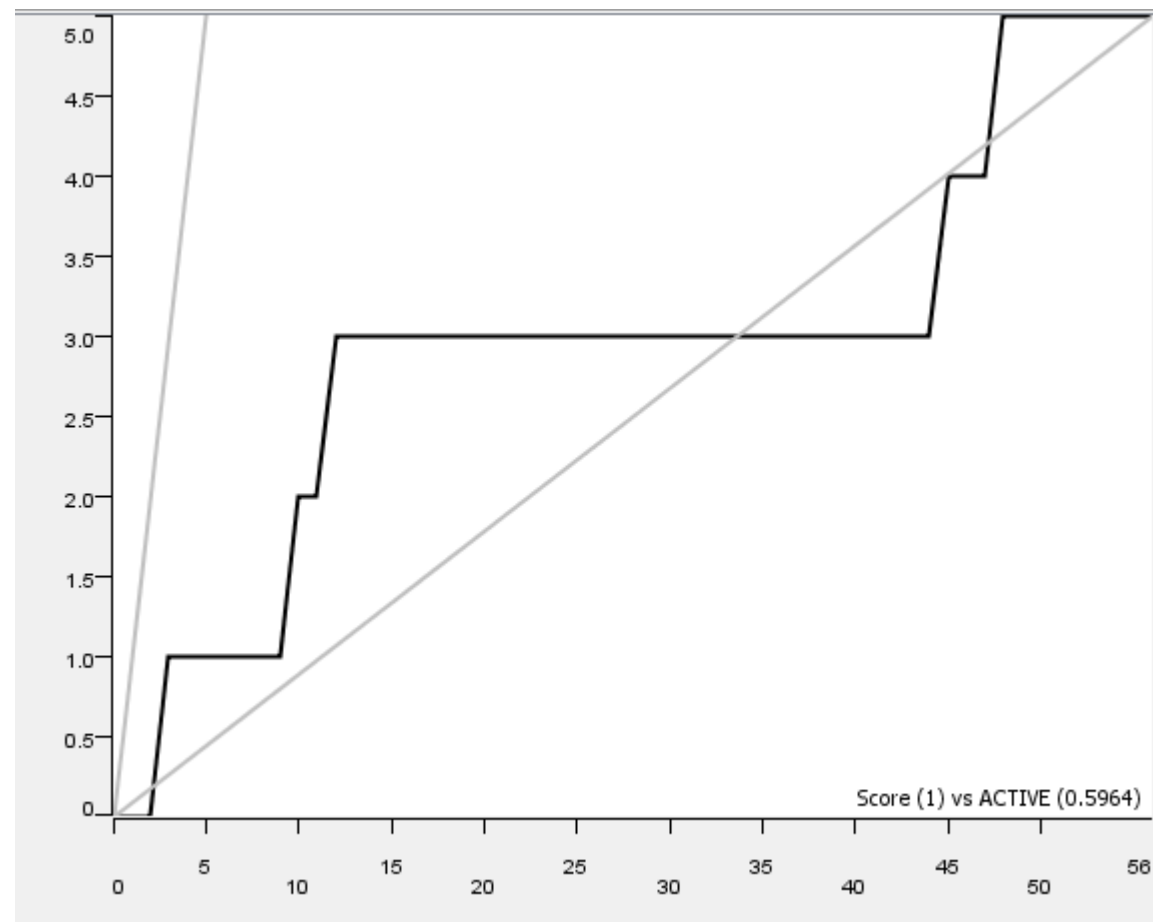

|          | Predicted Active | Predicted Inactive |
|----------|------------------|--------------------|
| Active   | 3                | 2                  |
| Inactive | 16               | 35                 |



<25 nM DefGood in TYRO3, 5% error;  
Random seed = 121783

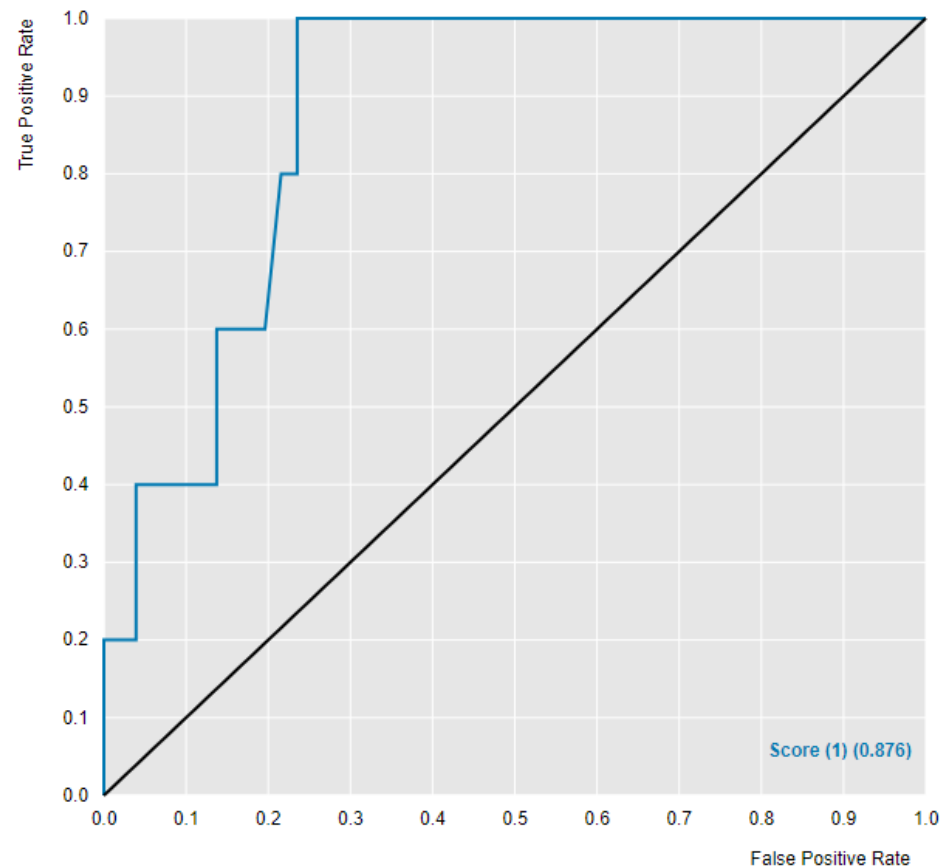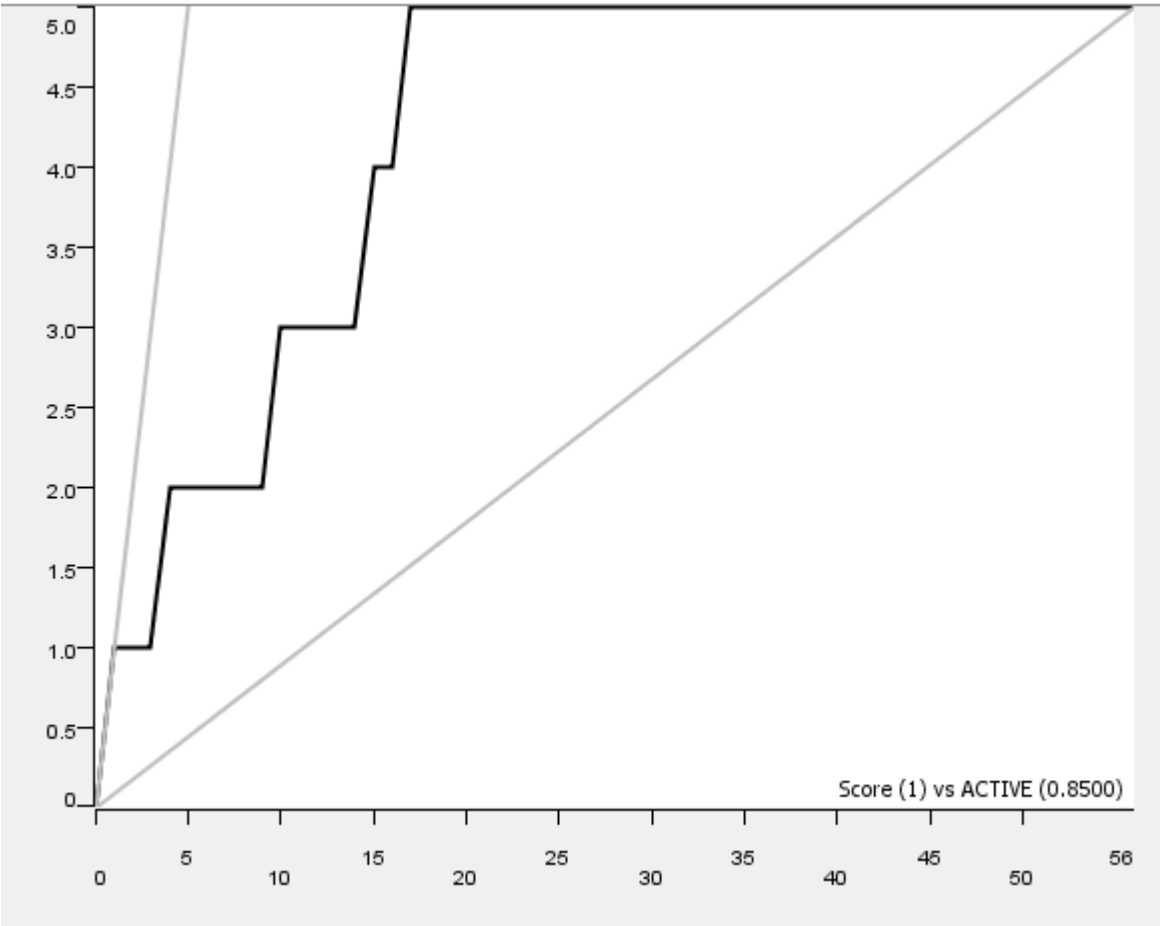

N=56

● Score (1) ● random

|                   |          |
|-------------------|----------|
| Top 10% Mean IC50 | 1,100 nM |
|-------------------|----------|

|          | Predicted Active | Predicted Inactive |
|----------|------------------|--------------------|
| Active   | 5                | 0                  |
| Inactive | 21               | 30                 |

<25nM DefGood in TYRO3, 10% error;  
Random seed = 121783

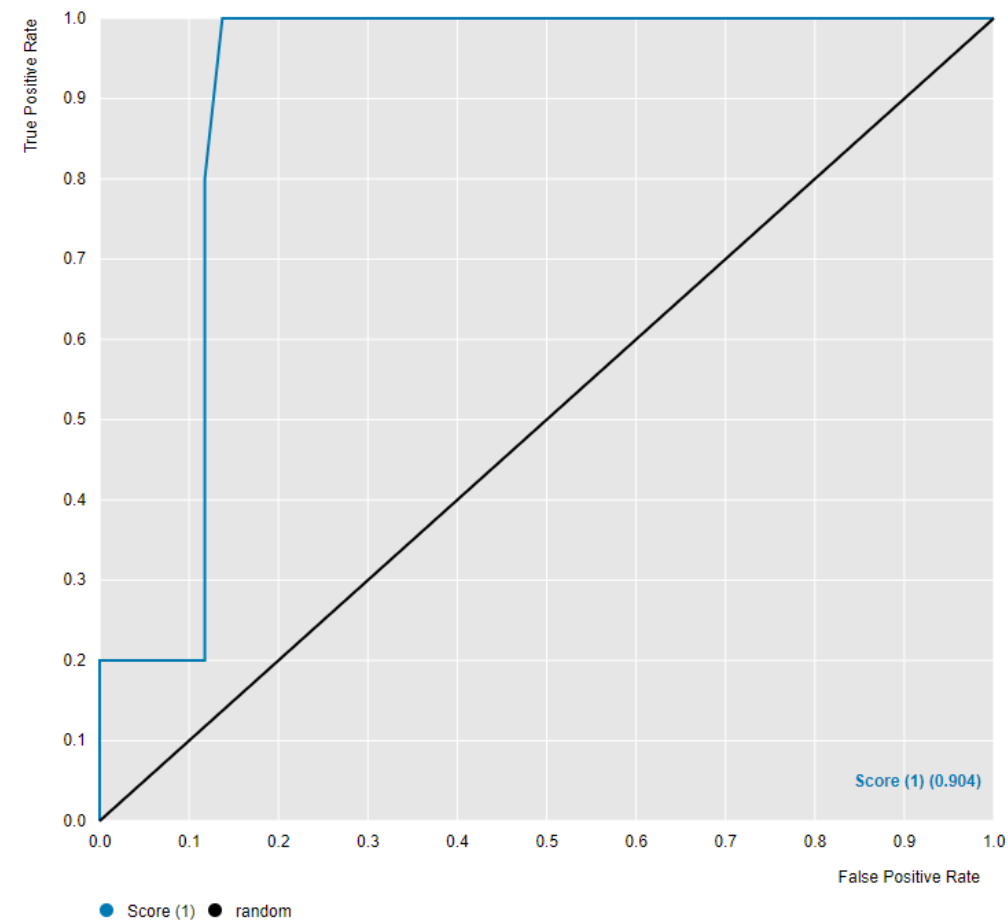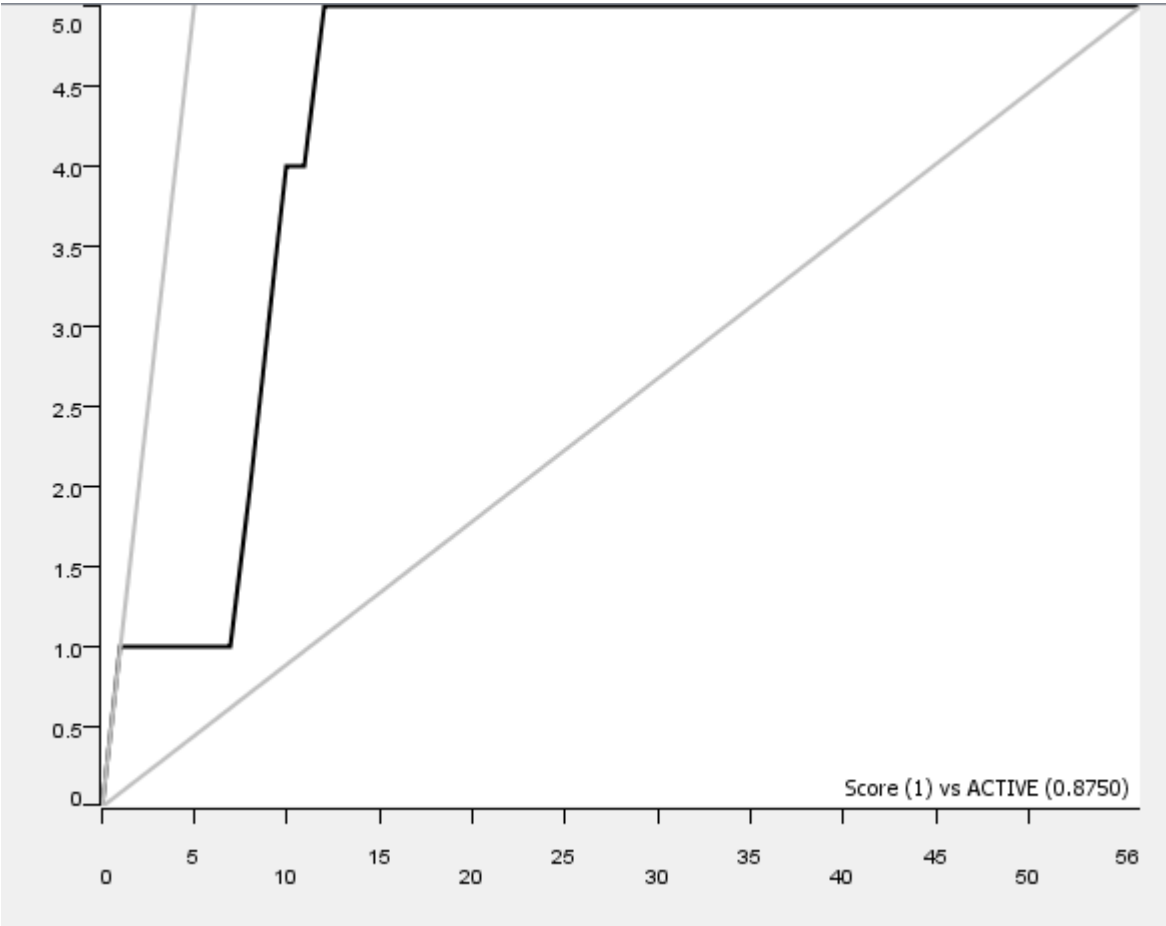

N=56

|                   |                                         |
|-------------------|-----------------------------------------|
| Top 10% Mean IC50 | 915 nM<br>One severe micromolar mistake |
|-------------------|-----------------------------------------|

|          | Predicted Active | Predicted Inactive |
|----------|------------------|--------------------|
| Active   | 5                | 0                  |
| Inactive | 21               | 30                 |

# Conclusion - NBN

- An NBN could be generated for TYRO3 kinase with a decision value of <25 nM as defined as active. The predictivity of the algorithm could be preserved in three random train/test cycles. The point of failure was 30%, 10% and 5% error.

# RF Error Tolerance- <25 nM DefGood in TYRO3

- 0-50% absolute error

# RF- <25nM DefGood in TYRO3, 10% error

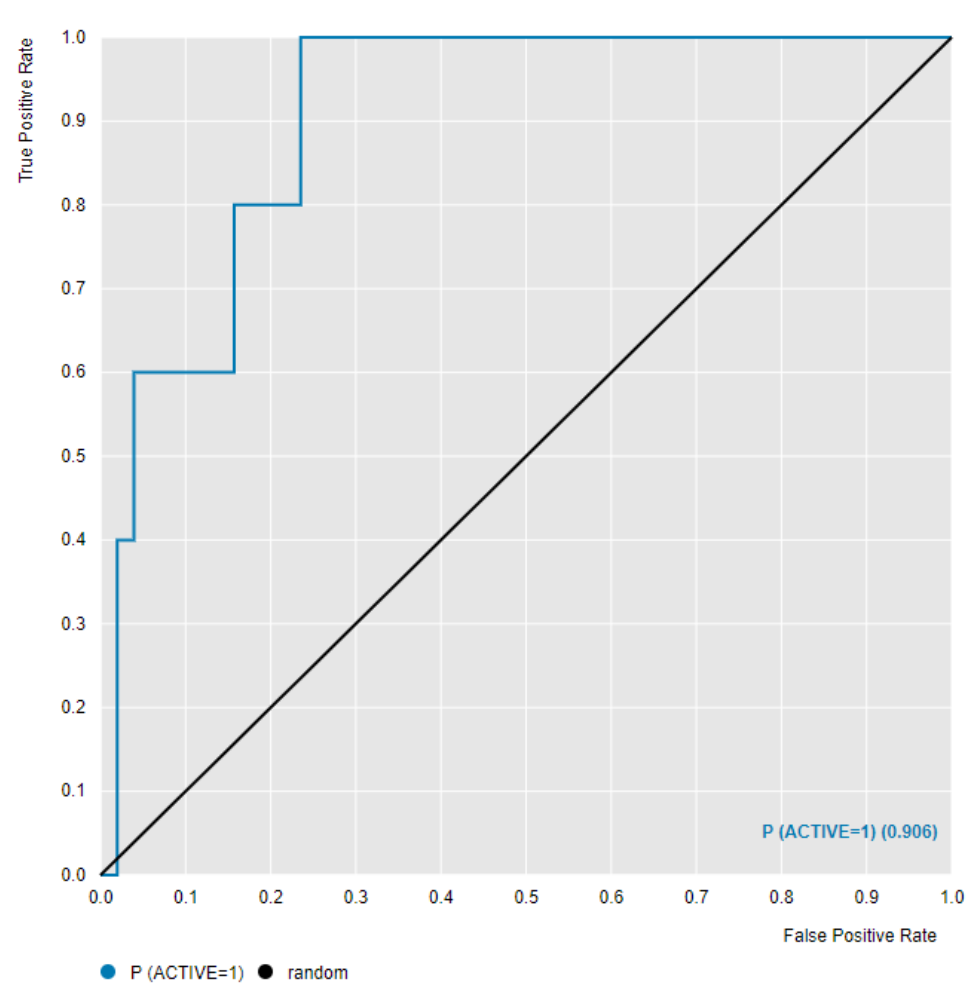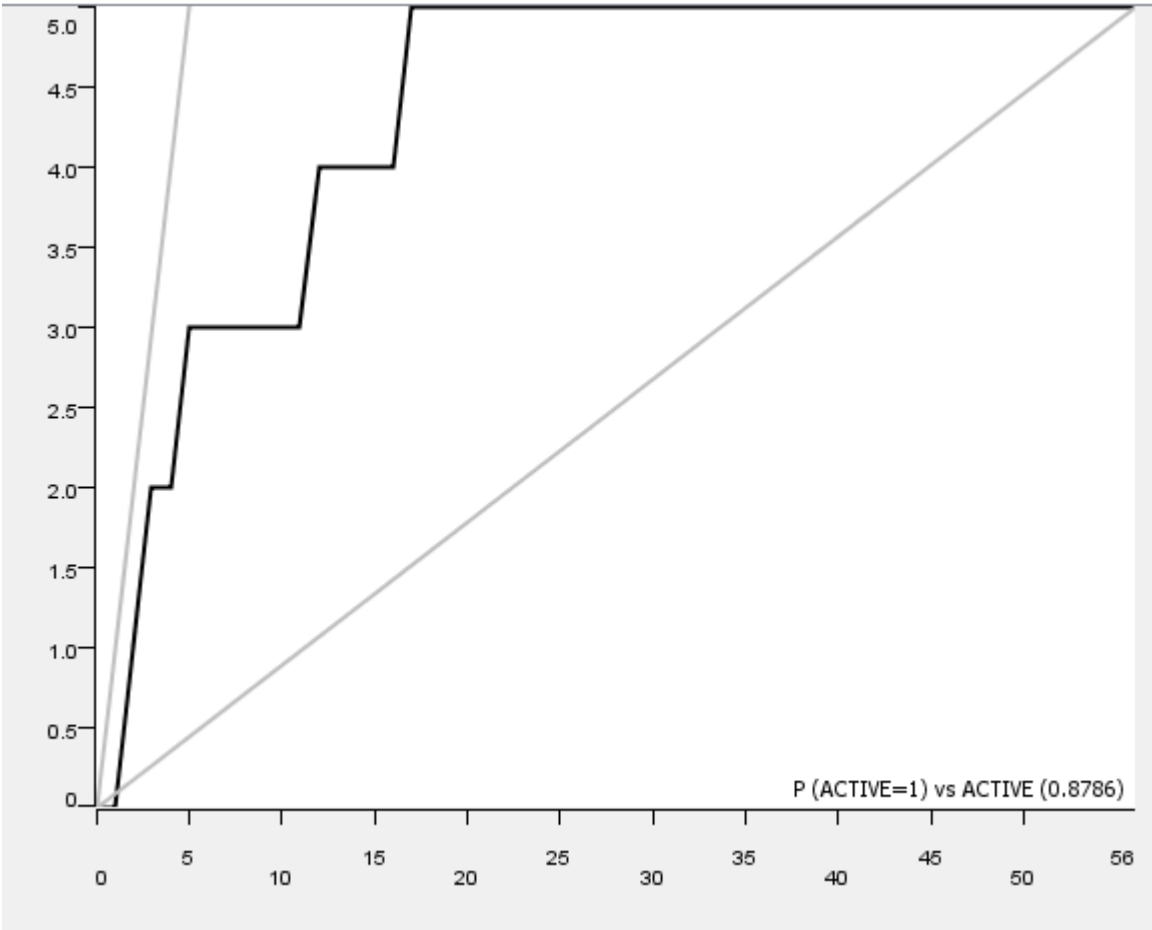

N=56

|                   |         |
|-------------------|---------|
| Top 10% Mean IC50 | 39.9 nM |
|-------------------|---------|

|          | Predicted Active | Predicted Inactive |
|----------|------------------|--------------------|
| Active   | 3                | 2                  |
| Inactive | 4                | 47                 |

# RF- <25nM DefGood in TYRO3, 15% error

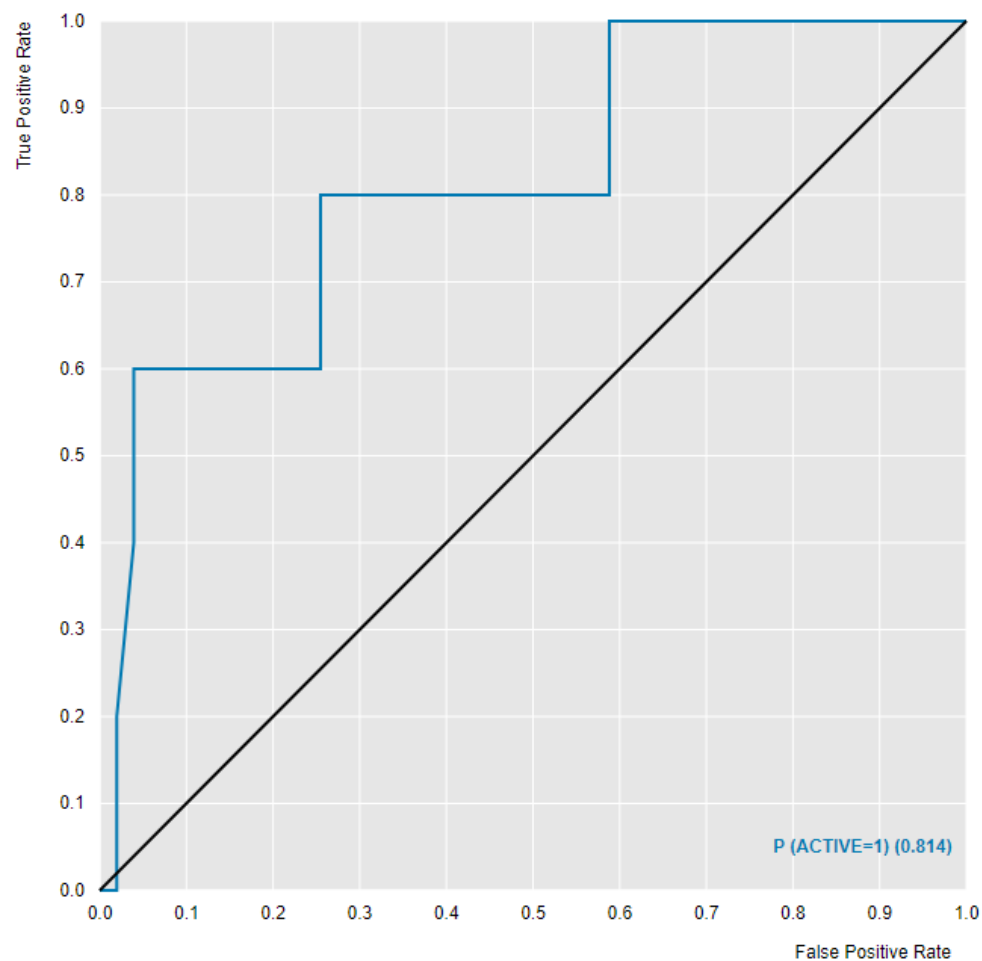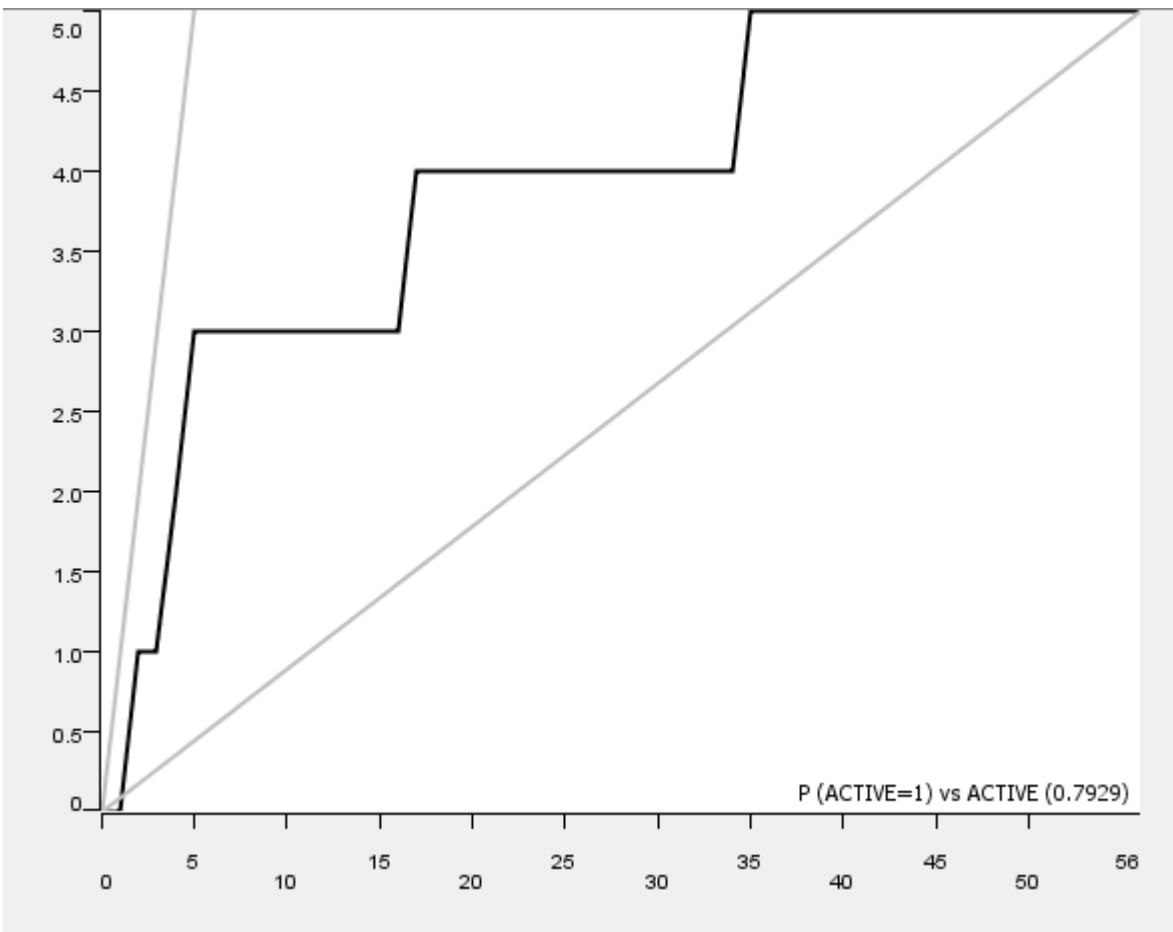

N=56

● P (ACTIVE=1) ● random

| Top 10% Mean IC50 | 39.9 nM |
|-------------------|---------|
|-------------------|---------|

|          | Predicted Active | Predicted Inactive |
|----------|------------------|--------------------|
| Active   | 3                | 2                  |
| Inactive | 4                | 47                 |

# RF- <25nM DefGood in TYRO3, 20% error

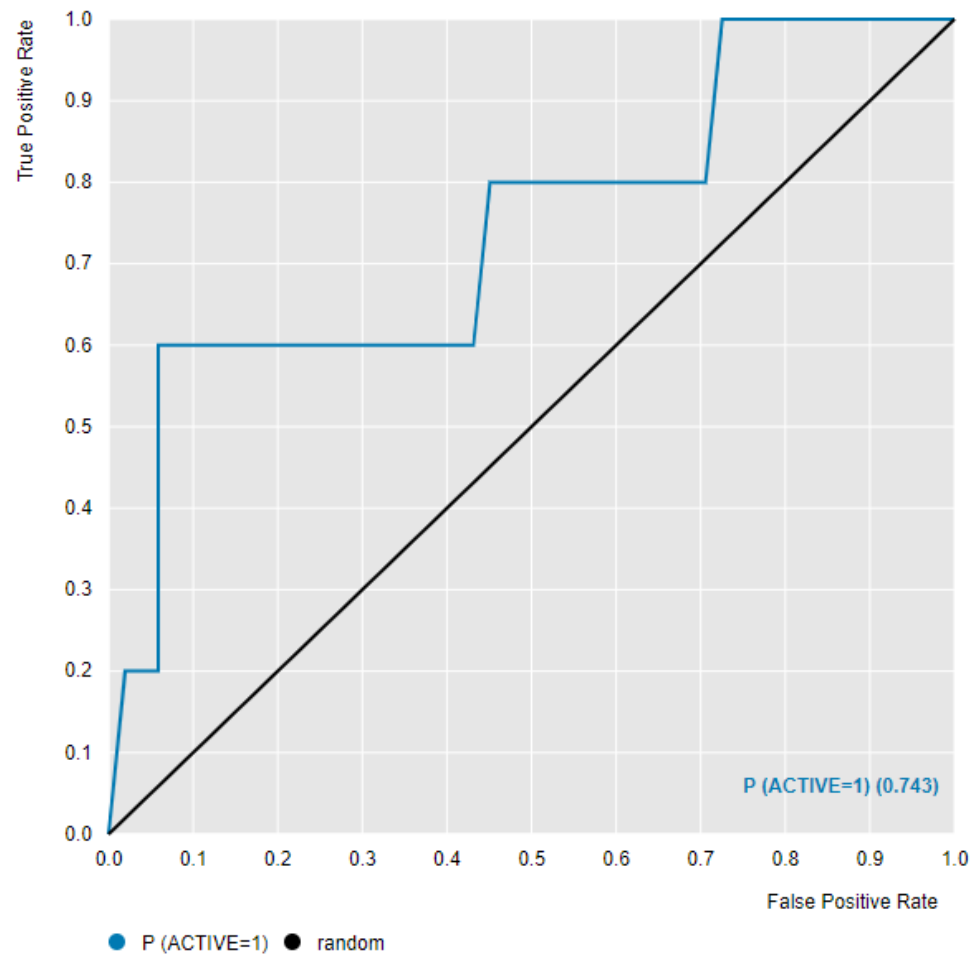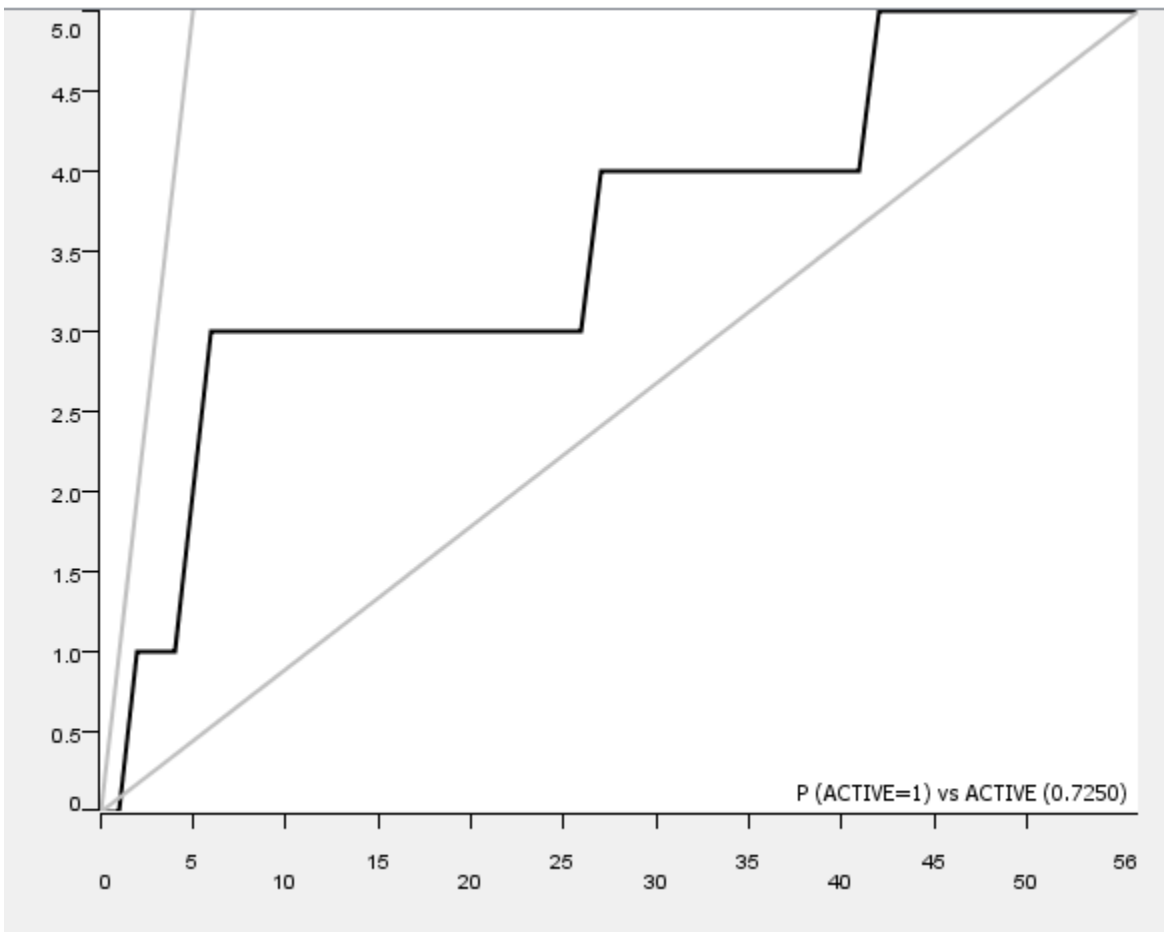

N=56

|                   |          |
|-------------------|----------|
| Top 10% Mean IC50 | 3,900 nM |
|-------------------|----------|

|          | Predicted Active | Predicted Inactive |
|----------|------------------|--------------------|
| Active   | 3                | 2                  |
| Inactive | 4                | 47                 |

<25nM DefGood in TYRO3, 0% error; Random seed = 429

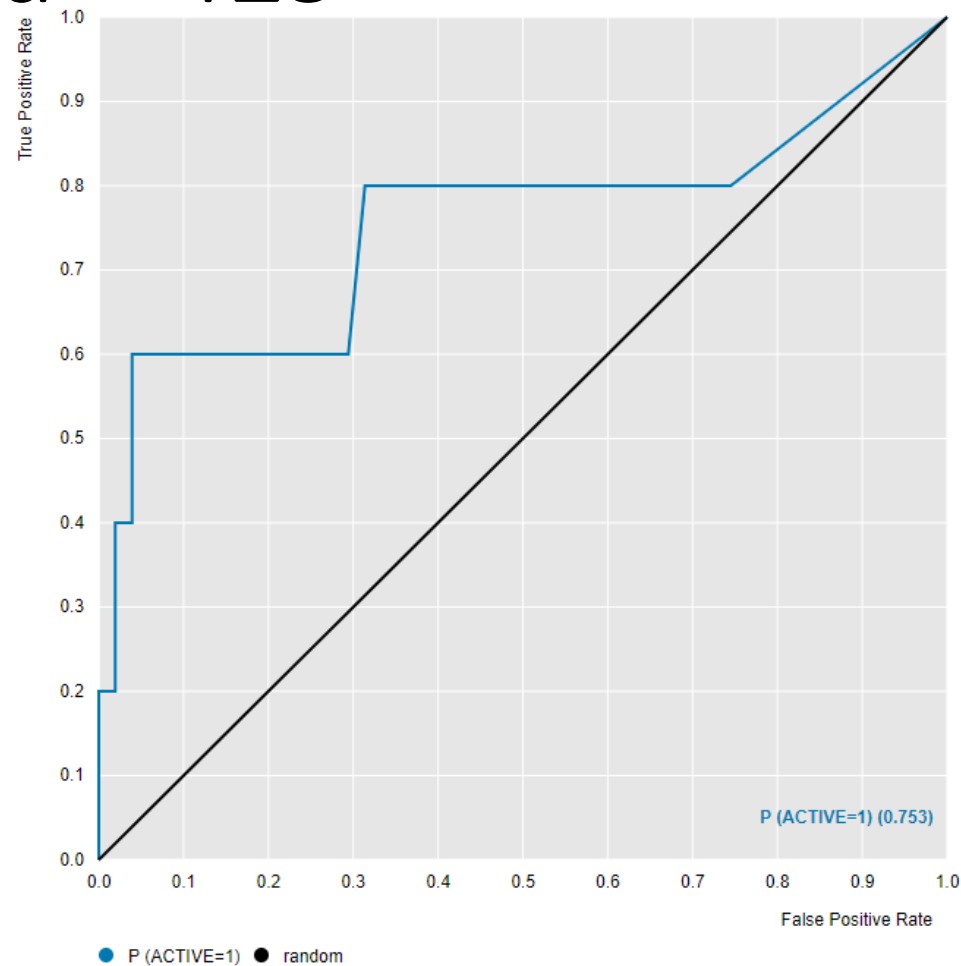

N=56

| Top 10% Mean IC50 | 20.2 nM |
|-------------------|---------|
|-------------------|---------|

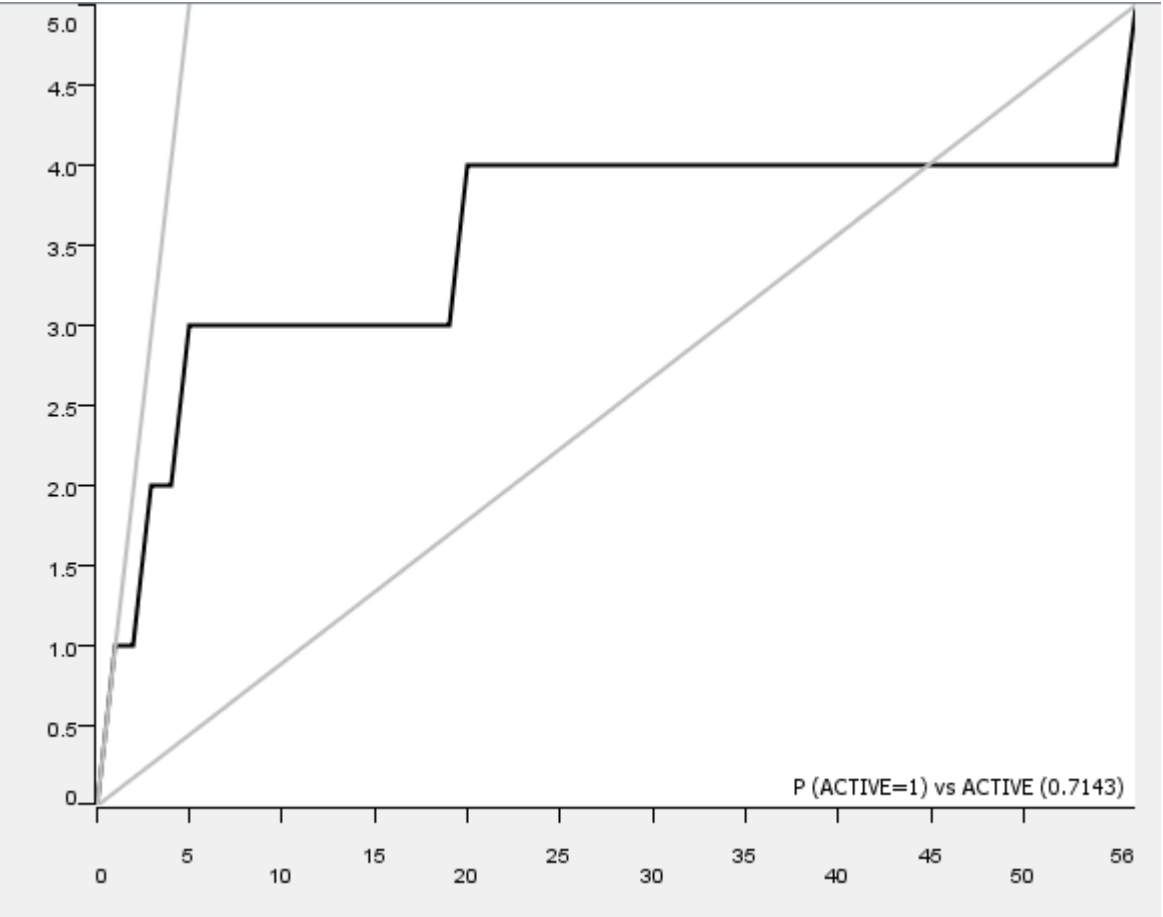

|          | Predicted Active | Predicted Inactive |
|----------|------------------|--------------------|
| Active   | 1                | 4                  |
| Inactive | 0                | 51                 |



<25nM DefGood in TYRO3, 5% error; Random seed = 429

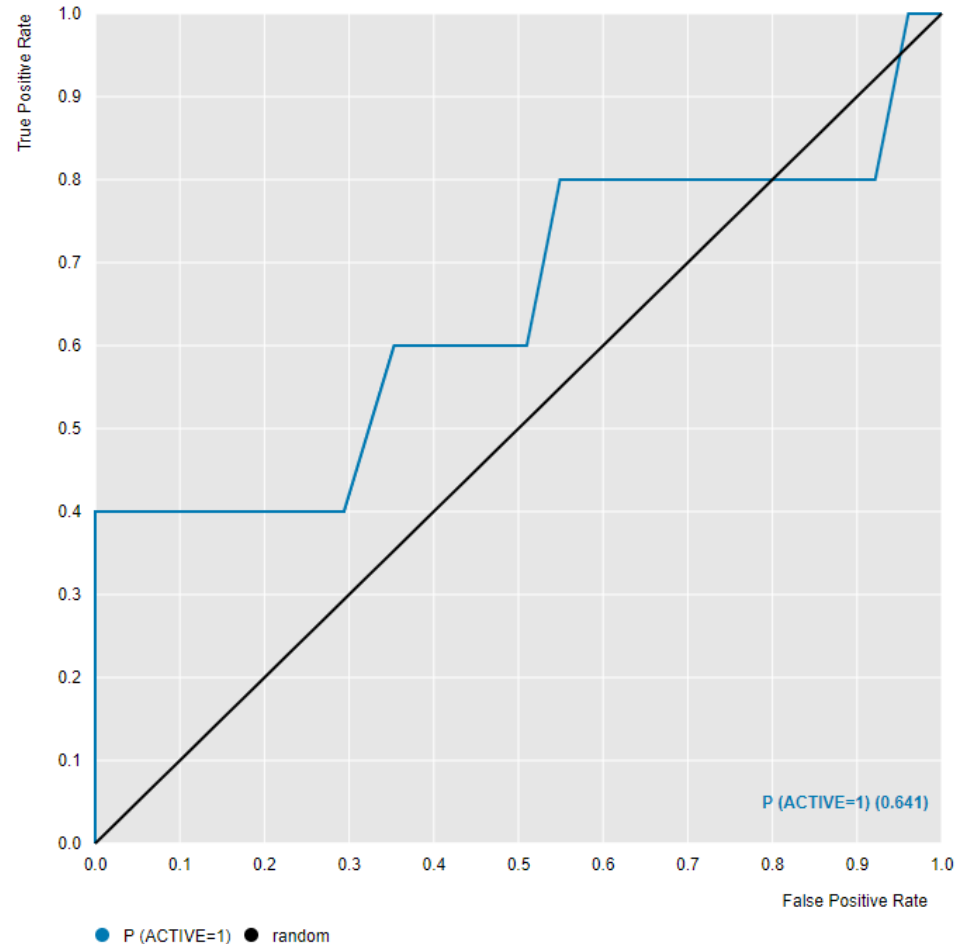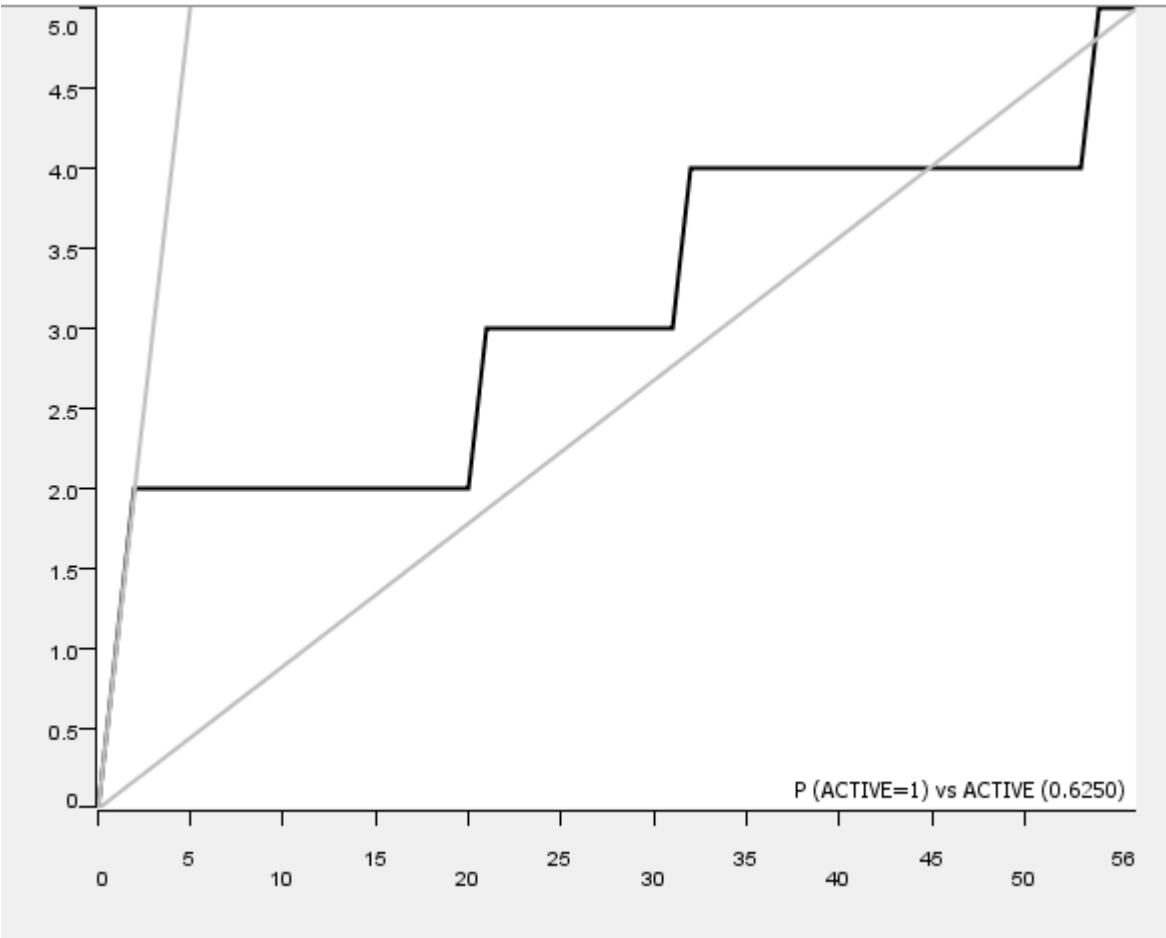

N=56

| Top 10% Mean IC50 | 36.8 nM |
|-------------------|---------|
|-------------------|---------|

|          | Predicted Active | Predicted Inactive |
|----------|------------------|--------------------|
| Active   | 0                | 5                  |
| Inactive | 0                | 51                 |

<25nM DefGood in TYRO3, 10% error;  
Random seed = 429

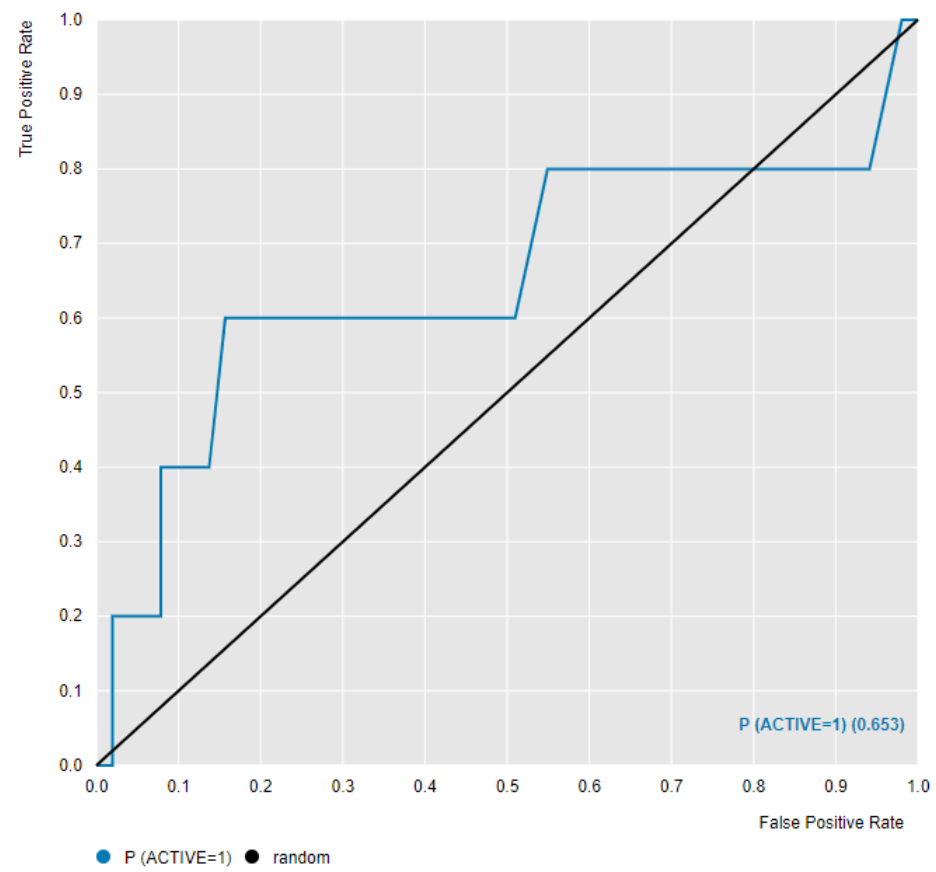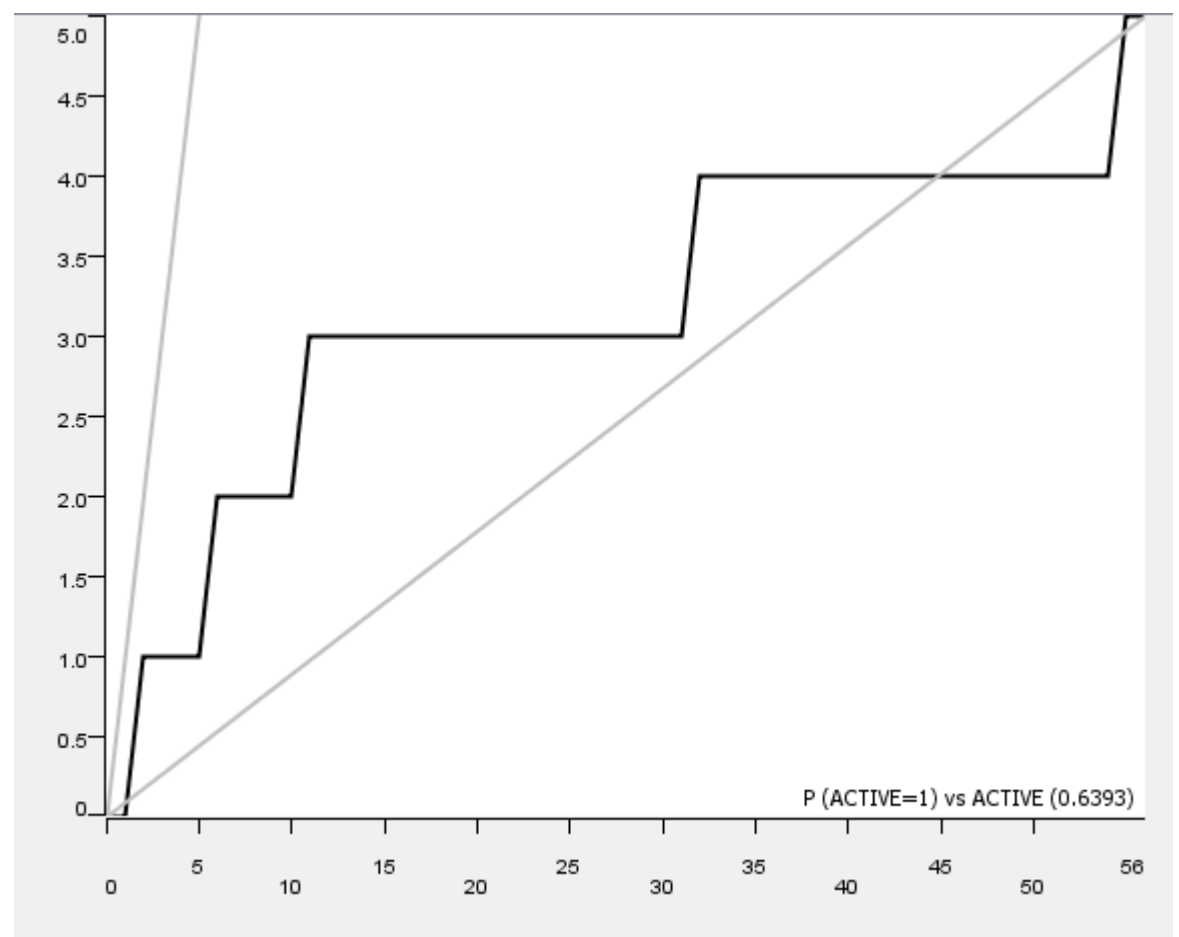

N=56

|                   |         |
|-------------------|---------|
| Top 10% Mean IC50 | 63.8 nM |
|-------------------|---------|

|          | Predicted Active | Predicted Inactive |
|----------|------------------|--------------------|
| Active   | 0                | 5                  |
| Inactive | 1                | 50                 |

<25nM DefGood in TYRO3, 0% error; Random seed = 121783

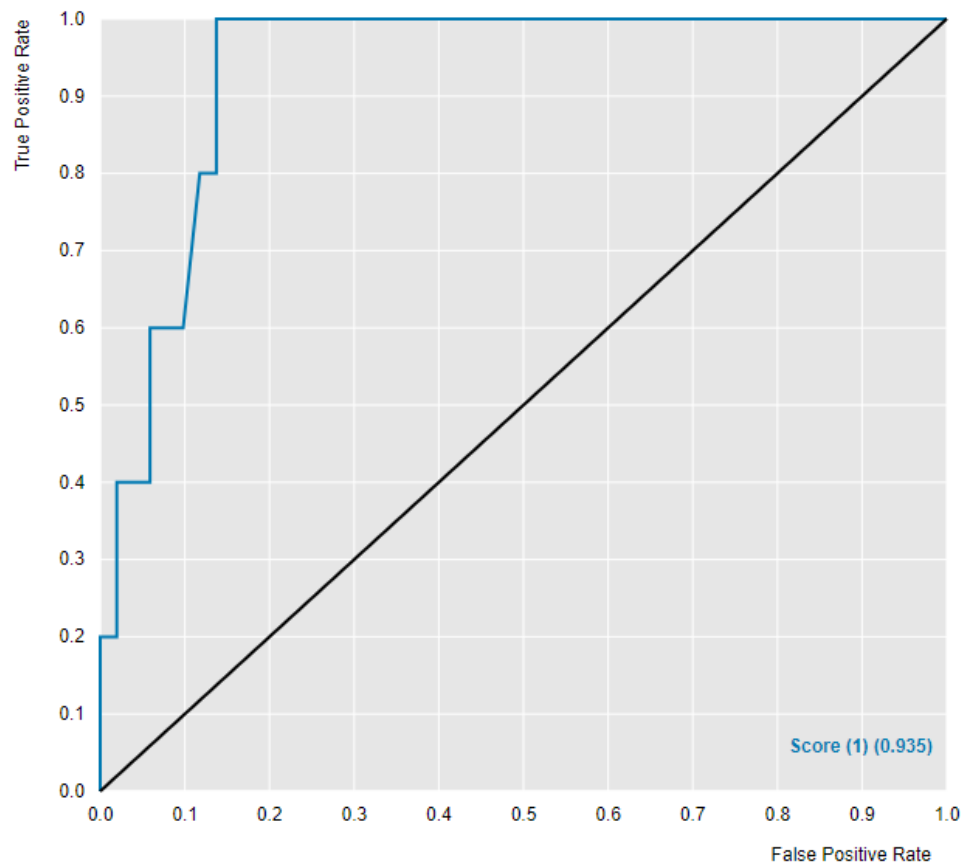

N=56      ● Score (1)   ● random

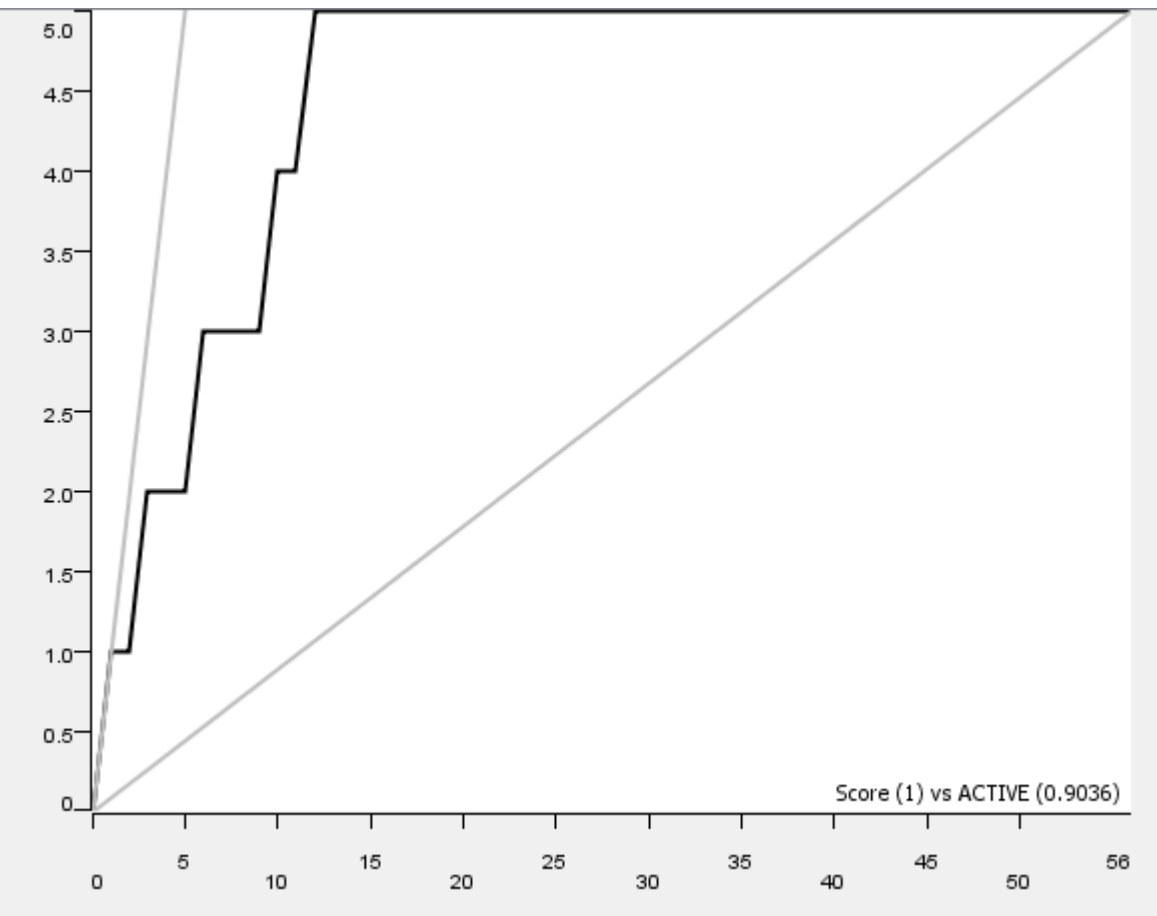

|                   |                                  |
|-------------------|----------------------------------|
| Top 10% Mean IC50 | 886 nM<br>(one 4,300 nM mistake) |
|-------------------|----------------------------------|

|          | Predicted Active | Predicted Inactive |
|----------|------------------|--------------------|
| Active   | 5                | 0                  |
| Inactive | 13               | 38                 |

- 121783 failed to give a good model in the RF, 12178 was used instead

# <25nM DefGood in TYRO3, 0% error; Random seed = 12178

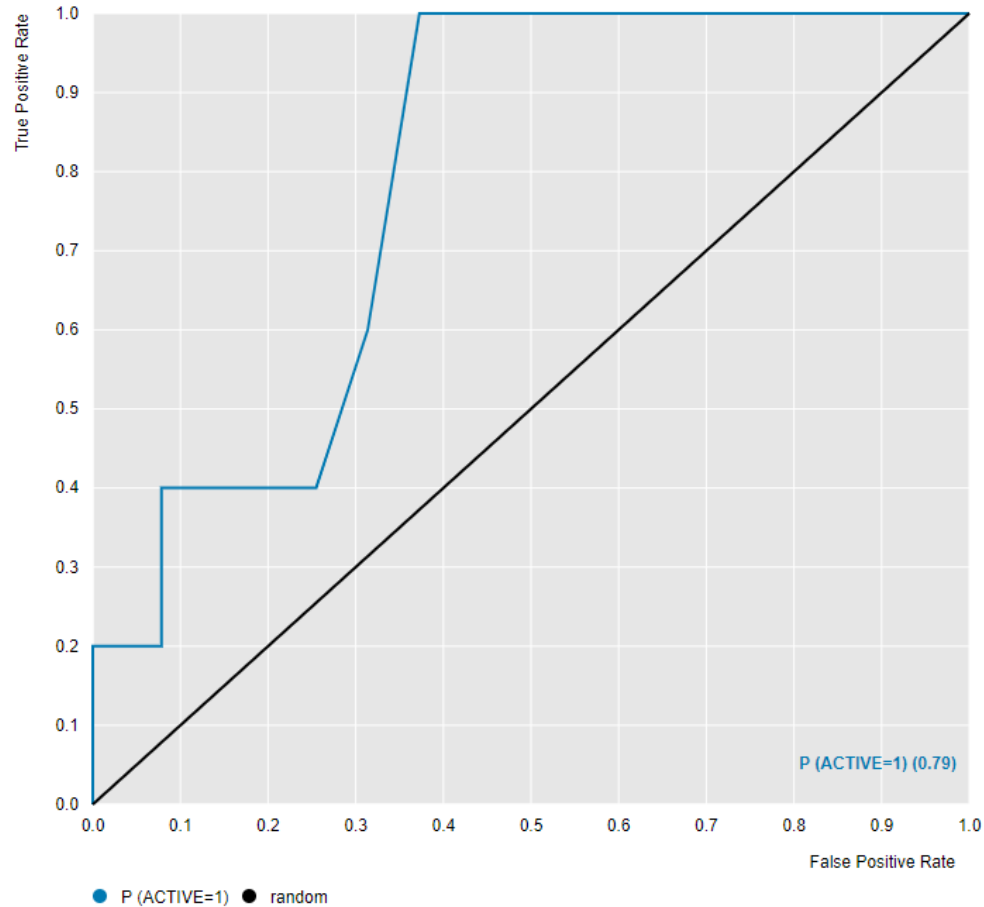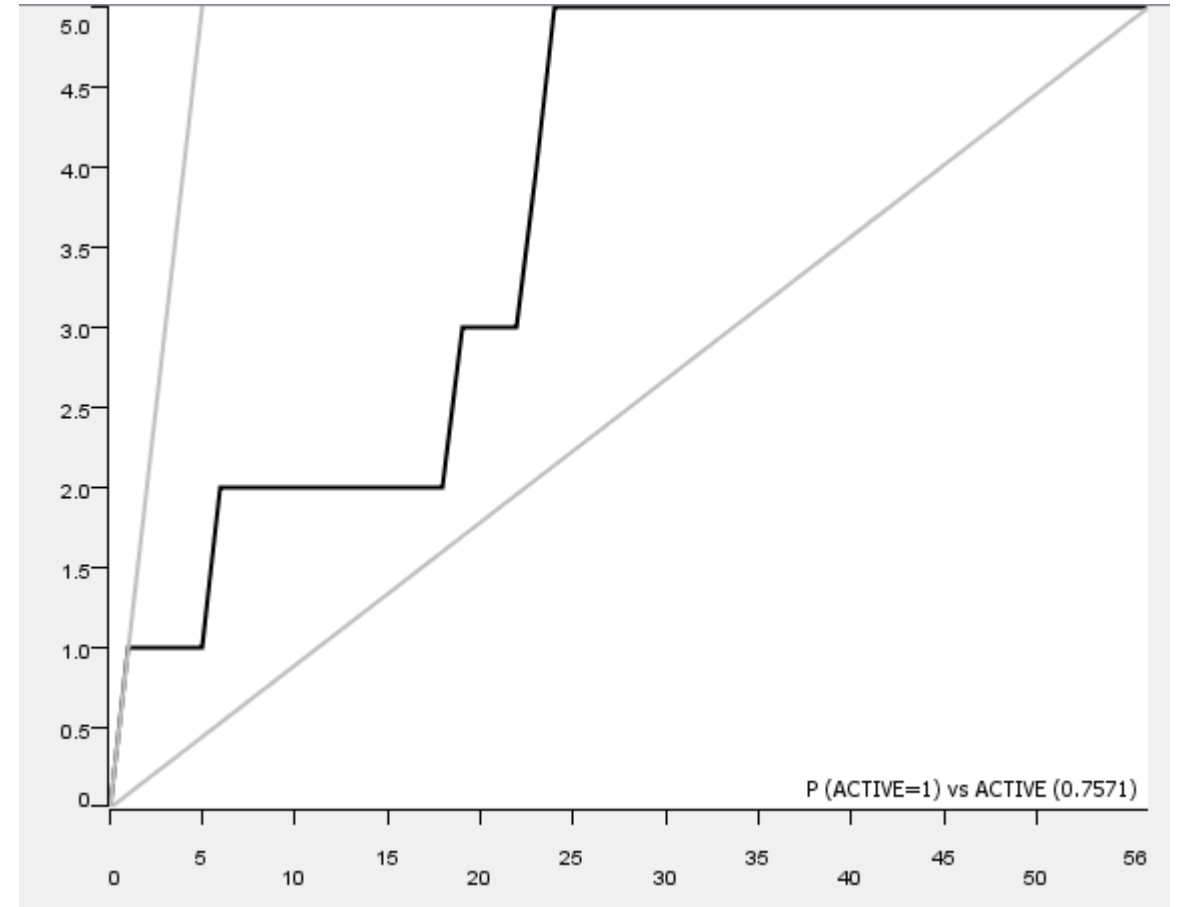

N=56

| Top 10% Mean IC50 | 54.8 nM |
|-------------------|---------|
|-------------------|---------|

|          | Predicted Active | Predicted Inactive |
|----------|------------------|--------------------|
| Active   | 1                | 4                  |
| Inactive | 1                | 50                 |

<25nM DefGood in TYRO3, 5% error; Random seed = 12178

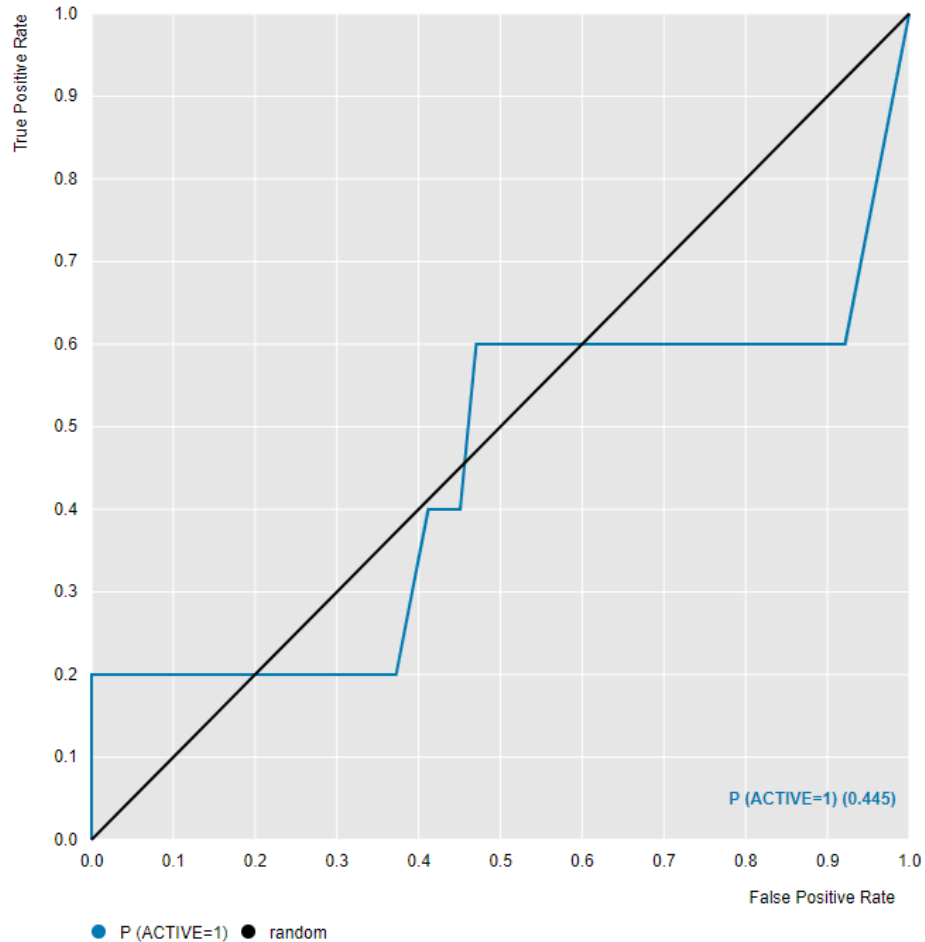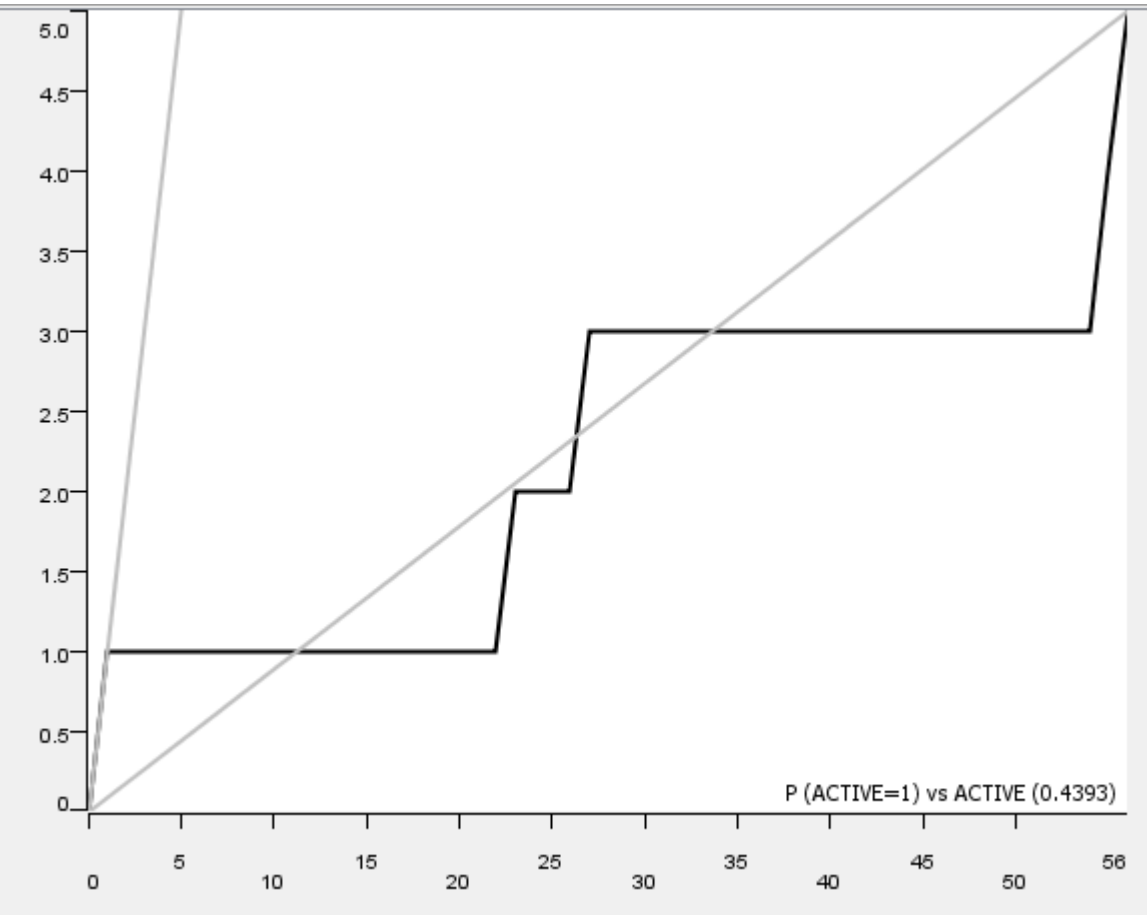

N=56

|                   |          |
|-------------------|----------|
| Top 10% Mean IC50 | 266.8 nM |
|-------------------|----------|

|          | Predicted Active | Predicted Inactive |
|----------|------------------|--------------------|
| Active   | 1                | 4                  |
| Inactive | 2                | 49                 |

# Conclusion - RF

- A Random Forrest could be generated for TYRO3 kinase with a decision value of  $<25$  nM as defined as active. In two out of three cases, the algorithm could accommodate small amounts of error. In one case, a successful algorithm could not be generated as the original dataset with a split using 121783 as the seed generated a top 10% IC50 of  $>800$  nM. Therefore, another seed (12178) was used, and this set was found to generate a useful NBN. The point of failure was 20%, 5% and 5% error.

# Conclusion - PNN

- A PNN could not be used.
