# Supplementary material for: Error Tolerance of Machine Learning Algorithms across Contemporary Biological Targets
Source: Molecules. 2019 Jun 4;24(11):2115. doi: 10.3390/molecules24112115 (PMC6601015; doi:10.3390/molecules24112115)
Supplement: Supplementary file 1 [file molecules-24-02115-s001.zip › Excel of Retrospective Predictive Performance for All Algorithms.xlsx]

## Sheet: Sheet1
Algorithm Name	N	ROC AUC	Top 10% Mean IC50 (nM)	Bottom 10% Mean IC50 (nM)	True Positives	True Negatives	False Positives	False Negatives
ALK
NBN <20 nM DefGood in AKL, 27% error (FEP interval); Random seed = 1515533876005	270	0.916	18	17000	79	149	29	13
NBN <20 nM DefGood in AKL, 27% error (FEP interval); Random seed = 429	270	0.897	22.5	7000	85	133	45	7
NBN <20 nM DefGood in AKL, 27% error (FEP interval); Random seed = 121783	270	0.887	99.8	14000	80	736	42	12
RF <20 nM DefGood in AKL, 27% error (FEP interval); Random seed = 1515533876005	270	0.911	4.87	17000	68	156	22	24
RF <20 nM DefGood in AKL, 27% error (FEP interval); Random seed = 429	270	0.92	15.6	7000	79	150	28	13
RF<20 nM DefGood in AKL, 27% error (FEP interval); Random seed = 121783	270	0.93	9.74	12000	75	161	17	17
NBN <5 nM DefGood in ALK	270	0.874	5.3	Not Calculated (NC)	44	165	55	6
NBN <10 nM DefGood in ALK	269	0.914	14.6	NC	67	154	45	3
NBN <15 nM DefGood in ALK	269	0.885	7.3	NC	71	142	46	10
NBN <20 nM DefGood in ALK	270	0.917	6.7	NC	82	139	39	10
NBN <25 nM DefGood in ALK	269	0.905	19.1	NC	88	130	44	7
RF - <15 nM DefGood in ALK	269	0.931	3.9	NC	61	166	22	20
RF - <20 nM DefGood in ALK	269	0.913	3.3	NC	68	154	24	24
RF - <25 nM DefGood in ALK	269	0.934	14.5	NC	76	155	19	19
PNN - <20 nM DefGood in AKL	270	0.782	34.7	NC	49	151	27	43
PNN - <15 nM DefGood in AKL (unparameterized)	269	0.74	1200	NC	18	181	7	63
PNN - <25 nM DefGood in AKL (unparameterized)	269	0.767	1100	NC	47	145	29	48
PNN - <15 nM DefGood in AKL (parameterized) (theta minus = 0.15; theta plus = 0.55)	269	0.73	1200	NC	24	174	14	57
PNN - <25 nM DefGood in AKL (parameterized) (theta minus = 0.45; theta plus = 0.45)	269	0.745	340	NC	42	151	23	53
NBN <20 nM DefGood in AKL, 5% error; Random seed = 1515533876005	270	0.922	6.9	NC	80	143	35	12
NBN <20 nM DefGood in AKL, 10% error; Random seed = 1515533876005	270	0.915	7.3	NC	83	141	37	9
NBN <20 nM DefGood in AKL, 15% error; Random seed = 1515533876005	270	0.904	20.1	NC	83	138	40	10
NBN <20 nM DefGood in AKL, 20% error; Random seed = 1515533876005	270	0.903	13	NC	82	136	42	10
NBN <20 nM DefGood in AKL, 30% error; Random seed = 1515533876005	270	0.858	13.8	NC	78	135	43	14
NBN <20 nM DefGood in AKL, 40% error; Random seed = 1515533876005	270	0.742	53.5	NC	82	123	55	30
NBN <20 nM DefGood in AKL, 45% error; Random seed = 1515533876005	270	0.674	1400	NC	71	82	96	21
NBN <20 nM DefGood in AKL, 10% error; Random seed = 429	270	0.897	22.3	NC	83	142	36	9
NBN <20 nM DefGood in AKL, 20% error; Random seed = 429	270	0.87	22.9	NC	81	134	44	11
NBN <20 nM DefGood in AKL, 30% error; Random seed = 429	270	0.846	22.4	NC	69	140	38	23
NBN <20 nM DefGood in AKL, 40% error; Random seed = 429	270	0.747	280	NC	32	161	17	60
NBN <20 nM DefGood in AKL, 45% error; Random seed = 429	270	0.632	900	NC	17	168	10	75
NBN <20 nM DefGood in AKL, 10% error; Random seed = 121783	270	0.866	21	NC	81	122	56	11
NBN <20 nM DefGood in AKL, 20% error; Random seed = 121783	270	0.828	18.4	NC	74	128	50	18
NBN <20 nM DefGood in AKL, 30% error; Random seed = 121783	270	0.814	20.4	NC	63	147	31	29
NBN <20 nM DefGood in AKL, 40% error; Random seed = 121783	270	0.791	20	NC	57	150	28	35
NBN <20 nM DefGood in AKL, 45% error; Random seed = 121783	270	0.704	130	NC	47	150	28	45
NBN <20 nM DefGood in AKL, 50% error; Random seed = 121783	270	0.539	2400	NC	67	55	123	25
RF <20 nM DefGood in AKL, 5% error; Random seed = 1515533876005	270	0.916	2.8	NC	66	156	22	26
RF <20 nM DefGood in AKL, 10% error; Random seed = 1515533876005	270	0.898	3.5	NC	68	152	26	24
RF <20 nM DefGood in AKL, 20% error; Random seed = 1515533876005	270	0.85	6.8	NC	62	148	30	30
RF <20 nM DefGood in AKL, 25% error; Random seed = 1515533876005	270	0.828	362	NC	66	140	38	26
RF <20 nM DefGood in AKL, 30% error; Random seed = 1515533876005	270	0.726	1800	NC	56	132	46	36
RF <20 nM DefGood in AKL, 10% error; Random seed = 429	270	0.894	16.2	NC	67	150	28	25
RF <20 nM DefGood in AKL, 20% error; Random seed = 429	270	0.833	139	NC	62	139	39	30
RF <20 nM DefGood in AKL, 25% error; Random seed = 429	270	0.798	233	NC	58	135	43	34
RF <20 nM DefGood in AKL, 35% error; Random seed = 429	270	0.739	111	NC	55	126	52	37
RF <20 nM DefGood in AKL, 40% error; Random seed = 429	270	0.677	383	NC	50	124	54	42
RF <20 nM DefGood in AKL, 10% error; Random seed = 121783	270	0.904	13.4	NC	71	157	21	21
RF <20 nM DefGood in AKL, 20% error; Random seed = 121783	270	0.849	15.9	NC	63	156	22	29
RF <20 nM DefGood in AKL, 30% error; Random seed = 121783	270	0.777	19	NC	56	151	27	36
RF <20 nM DefGood in AKL, 35% error; Random seed = 121783	270	0.746	19.5	NC	54	142	36	38
RF <20 nM DefGood in AKL, 40% error; Random seed = 121783	270	0.68	128	NC	53	122	56	39
PNN <20 nM DefGood in AKL, 5% error; Random seed = 1515533876005	270	0.745	223	NC	49	145	33	43
PNN <20 nM DefGood in AKL, 10% error; Random seed = 1515533876005	270	0.725	440	NC	51	138	40	41
PNN <20 nM DefGood in AKL, 15% error; Random seed = 1515533876005	270	0.701	14	NC	33	156	22	59
PNN <20 nM DefGood in AKL, 20% error; Random seed = 1515533876005	270	0.644	1400	NC	32	145	33	60
PNN <20 nM DefGood in AKL, 20% error; (reparametrized; (0.95, 0.85) (Theta minus and plus)	270	0.654	779	NC	25	167	11	67
PNN <20 nM DefGood in AKL, 15% error; Random seed = 429	270	0.739	552	NC	45	149	29	47
PNN <20 nM DefGood in AKL, 20% error; Random seed = 429	270	0.734	600	NC	45	143	35	47
PNN <20 nM DefGood in AKL, 25% error; Random seed = 429	270	0.706	637	NC	46	137	41	46
PNN <20 nM DefGood in AKL, 30% error; Random seed = 429	270	0.658	680	NC	44	123	55	48
PNN <20 nM DefGood in AKL, 30% error; (reparametrized; (0.95, 0.85) (Theta minus and plus)	270	0.615	320	NC	37	146	32	55
PNN <20 nM DefGood in AKL, 10% error; Random seed = 121783	270	0.736	375	NC	44	151	27	48
PNN <20 nM DefGood in AKL, 15% error; Random seed = 121783	270	0.677	115	NC	37	152	26	55
PNN <20 nM DefGood in AKL, 20% error; Random seed = 121783	270	0.654	115	NC	34	147	31	58
Aurora B Kinase
NBN <5 nM DefGood in ALK	297	0.81	157	NC	16	210	61	10
NBN <10 nM DefGood in ALK	297	0.872	30.6	NC	39	187	64	7
NBN <15 nM DefGood in ALK	297	0.852	53.1	NC	51	173	66	7
NBN <20 nM DefGood in ALK	297	0.835	32.4	NC	52	183	44	18
NBN <25 nM DefGood in ALK	297	0.879	391	NC	60	181	40	16
RF - <10 nM DefGood in Aurora B	297	0.872	62.6	NC	20	242	9	26
PNN - <10 nM DefGood in Aurora B	297	0.629	5900	NC	3	250	1	43
PNN - <20 nM DefGood in Aurora B	297	0.633	2300	NC	4	227	0	66
NBN <10 nM DefGood in aurora B, 5% error; Random seed = 1515533876005	297	0.845	405	NC	37	188	63	9
NBN <10 nM DefGood in aurora B, 10% error; Random seed = 1515533876005	297	0.815	403	NC	28	210	41	18
NBN <10 nM DefGood in aurora B, 15% error; Random seed = 1515533876005	297	0.806	426	NC	26	218	33	20
NBN <10 nM DefGood in aurora B, 20% error; Random seed = 1515533876005	297	0.791	427	NC	33	194	57	13
NBN <10 nM DefGood in aurora B, 25% error; Random seed = 1515533876005	297	0.731	435	NC	28	171	80	18
NBN <10 nM DefGood in aurora B, 30% error; Random seed = 1515533876005	297	0.91	925	NC	24	153	98	22
NBN <10 nM DefGood in aurora B, 10% error; Random seed = 429	297	0.832	385	NC	36	190	61	10
NBN <10 nM DefGood in aurora B, 20% error; Random seed = 429	297	0.784	391	NC	24	211	40	22
NBN <10 nM DefGood in aurora B, 25% error; Random seed = 429	297	0.759	407	NC	26	204	47	20
NBN <10 nM DefGood in aurora B, 30% error; Random seed = 429	297	0.721	1000	NC	23	205	46	23
NBN <10 nM DefGood in aurora B, 10% error; Random seed = 121783	297	0.787	42.7	NC	23	223	28	23
NBN <10 nM DefGood in aurora B, 20% error; Random seed = 121783	297	53.9	0.709	NC	27	193	58	19
NBN <10 nM DefGood in aurora B, 25% error; Random seed = 121783	297	83.4	0.703	NC	26	198	53	20
NBN <10 nM DefGood in aurora B, 30% error; Random seed = 121783	297	67.4	0.729	NC	28	199	52	18
NBN <10 nM DefGood in aurora B, 35% error; Random seed = 121783	297	67.4	0.658	NC	28	199	52	18
RF- <10nM DefGood in aurora B, 10% error; Random seed = 1515533876005	297	93.1	0.782	NC	19	236	15	27
RF- <10nM DefGood in aurora B, 15% error; Random seed = 1515533876005	297	128	0.74	NC	17	227	24	29
RF- <10nM DefGood in aurora B, 20% error; Random seed = 1515533876005	297	534	0.688	NC	17	215	36	29
RF- <10nM DefGood in aurora B, 10% error; Random seed = 429	297	365	0.815	NC	19	230	21	27
RF- <10nM DefGood in aurora B, 15% error; Random seed = 429	297	656	0.811	NC	19	227	24	27
RF- <10nM DefGood in aurora B, 20% error; Random seed = 429	297	1000	0.752	NC	20	216	35	26
RF- <10nM DefGood in aurora B, 10% error; Random seed = 121783	297	221	0.799	NC	17	229	22	29
RF- <10nM DefGood in aurora B, 20% error; Random seed = 121783	297	395	0.709	NC	15	228	23	31
RF- <10nM DefGood in aurora B, 25% error; Random seed = 121783	297	1980	0.688	NC	14	22	31	32
β2 Adrenergic Receptor
NBN <5 nM DefGood in beta-adren	129	63	0.935	NC	12	105	11	1
NBN <10 nM DefGood in beta-adren	129	33.7	0.929	NC	15	96	17	1
NBN <15 nM DefGood in beta-adren	129	21.7	0.986	NC	18	102	9	0
NBN <20 nM DefGood in beta-adren	129	32.2	0.978	NC	19	95	15	0
NBN <25 nM DefGood in beta-adren	129	37.1	0.96	NC	19	99	10	1
RF - <15 nM DefGood in beta-adren	129	3.8	0.986	NC	15	108	3	3
PNN - <15 nM DefGood in beta-adren	129	13.1	0.952	NC	9	109	2	9
NBN <15 nM DefGood in beta-adren, 5% error; Random seed = 1515533876005	129	24.5	0.963	NC	12	103	8	6
NBN <15 nM DefGood in beta-adren, 10% error; Random seed = 1515533876005	129	24.5	0.957	NC	12	103	8	6
NBN <15 nM DefGood in beta-adren, 15% error; Random seed = 1515533876005	129	21.9	0.954	NC	16	99	12	2
NBN <15 nM DefGood in beta-adren, 20% error; Random seed = 1515533876005	129	21.1	0.952	NC	13	100	11	5
NBN <15 nM DefGood in beta-adren, 30% error; Random seed = 1515533876005	129	21.9	0.933	NC	13	100	11	5
NBN <15 nM DefGood in beta-adren, 40% error; Random seed = 1515533876005	129	24.5	0.908	NC	10	105	6	8
NBN <15 nM DefGood in beta-adren, 45% error; Random seed = 1515533876005	129	24.5	0.901	NC	18	34	77	0
NBN <15 nM DefGood in beta-adren, 50% error; Random seed = 1515533876005	129	2500	0.879	NC	18	34	77	0
NBN <15 nM DefGood in beta-adren, 10% error; Random seed = 429	129	17.9	0.963	NC	16	102	9	2
NBN <15 nM DefGood in beta-adren, 20% error; Random seed = 429	129	19.7	0.952	NC	15	100	11	3
NBN <15 nM DefGood in beta-adren, 30% error; Random seed = 429	129	30	0.95	NC	17	91	20	1
NBN <15 nM DefGood in beta-adren, 40% error; Random seed = 429	129	109	0.809	NC	17	44	67	1
NBN <15 nM DefGood in beta-adren, 45% error; Random seed = 429	129	105	0.872	NC	7	109	2	11
NBN <15 nM DefGood in beta-adren, 50% error; Random seed = 429	129	1900	0.637	NC	8	100	11	10
NBN <15 nM DefGood in beta-adren, 10% error; Random seed = 121783	129	18.5	0.961	NC	18	99	12	0
NBN <15 nM DefGood in beta-adren, 20% error; Random seed = 121783	129	18.5	0.963	NC	18	99	12	0
NBN <15 nM DefGood in beta-adren, 30% error; Random seed = 121783	129	18.4	0.964	NC	18	91	20	0
NBN <15 nM DefGood in beta-adren, 40% error; Random seed = 121783	129	18.4	0.927	NC	17	80	31	1
NBN <15 nM DefGood in beta-adren, 45% error; Random seed = 121783	129	33.1	0.835	NC	14	81	30	4
NBN <15 nM DefGood in beta-adren, 50% error; Random seed = 121783	129	250.5	0.623	NC	10	69	42	8
RF <15 nM DefGood in beta-adren, 5% error; Random seed = 1515533876005	129	4.8	0.986	NC	15	108	3	3
RF <15 nM DefGood in beta-adren, 10% error; Random seed = 1515533876005	129	4.7	0.971	NC	15	105	6	3
RF <15 nM DefGood in beta-adren, 20% error; Random seed = 1515533876005	129	95	0.948	NC	14	103	8	4
RF <15 nM DefGood in beta-adren, 30% error; Random seed = 1515533876005	129	130	0.85	NC	13	92	19	5
RF <15 nM DefGood in beta-adren, 35% error; Random seed = 1515533876005	129	3700	0.815	NC	13	87	24	5
RF <15 nM DefGood in beta-adren, 10% error; Random seed = 429	129	7.9	0.907	NC	13	105	6	5
RF <15 nM DefGood in beta-adren, 20% error; Random seed = 429	129	8.4	0.851	NC	12	102	9	6
RF <15 nM DefGood in beta-adren, 25% error; Random seed = 429	129	1800	0.81	NC	13	94	17	5
RF <15 nM DefGood in beta-adren, 10% error; Random seed = 121783	129	32.7	0.936	NC	10	104	7	8
RF <15 nM DefGood in beta-adren, 20% error; Random seed = 121783	129	91	0.876	NC	10	98	13	8
RF <15 nM DefGood in beta-adren, 30% error; Random seed = 121783	129	63	0.865	NC	11	96	15	7
RF <15 nM DefGood in beta-adren, 35% error; Random seed = 121783	129	110	0.834	NC	12	85	26	6
RF <15 nM DefGood in beta-adren, 40% error; Random seed = 121783	129	58.2	0.794	NC	11	85	26	7
RF <15 nM DefGood in beta-adren, 45% error; Random seed = 121783	129	771	0.779	NC	12	78	33	6
PNN <15 nM DefGood in beta-adren, 5% error; Random seed = 1515533876005	129	26.5	0.873	NC	10	108	3	8
PNN <15 nM DefGood in beta-adren, 10% error; Random seed = 1515533876005	129	1100	0.815	NC	10	105	6	8
PNN <15 nM DefGood in beta-adren, 5% error; Random seed = 429	129	21.7	0.844	NC	8	104	7	10
PNN <15 nM DefGood in beta-adren, 10% error; Random seed = 429	129	150	0.799	NC	8	100	11	10
PNN <15 nM DefGood in beta-adren, 15% error; Random seed = 429	129	184	0.772	NC	8	99	12	10
PNN <15 nM DefGood in beta-adren, 20% error; Random seed = 429	129	130000	0.665	NC	7	95	16	11
PNN <15 nM DefGood in beta-adren, 5% error; Random seed = 121783 (reparameterized Theta minus = 0.55; theta plus = 0.95)	129	1100	0.828	NC	7	105	6	11
c-Abl
NBN<5 nM DefGood in c-Abl	289	8	0.896	NC	44	196	43	5
NBN<10 nM DefGood in c-Abl	289	26.5	0.921	NC	61	178	43	6
NBN<15 nM DefGood in c-Abl	289	35.4	0.937	NC	71	177	35	6
NBN<20 nM DefGood in c-Abl	289	77.4	0.913	NC	73	173	33	9
NBN<25 nM DefGood in c-Abl	289	82.7	0.902	NC	70	173	27	19
RF<15 nM DefGood in c-Abl	289	35	0.952	NC	66	197	15	11
PNN<15 nM DefGood in c-Abl	289	41.8	0.87	NC	27	208	4	50
NBN <15 nM DefGood in c-Abl, 5% error; Random seed = 1515533876005	289	35.7	0.939	NC	70	181	31	7
NBN <15 nM DefGood in c-Abl, 10% error; Random seed = 1515533876005	289	35.5	0.938	NC	70	181	31	7
NBN <15 nM DefGood in c-Abl, 15% error; Random seed = 1515533876005	289	35.4	0.936	NC	71	179	33	6
NBN <15 nM DefGood in c-Abl, 20% error; Random seed = 1515533876005	289	35.4	0.93	NC	74	139	73	3
NBN <15 nM DefGood in c-Abl, 30% error; Random seed = 1515533876005	289	36	0.927	NC	67	185	27	10
NBN <15 nM DefGood in c-Abl, 40% error; Random seed = 1515533876005	289	41.6	0.87	NC	64	183	29	13
NBN <15 nM DefGood in c-Abl, 45% error; Random seed = 1515533876005	289	2000	0.756	NC	53	166	46	24
NBN <15 nM DefGood in c-Abl, 10% error; Random seed = 429	289	39.5	0.884	NC	60	180	32	17
NBN <15 nM DefGood in c-Abl, 20% error; Random seed = 429	289	39.2	0.878	NC	52	189	23	25
NBN <15 nM DefGood in c-Abl, 40% error; Random seed = 429	289	39.9	0.826	NC	39	202	10	38
NBN <15 nM DefGood in c-Abl, 45% error; Random seed = 429	289	13.5	0.818	NC	20	208	5	57
NBN <15 nM DefGood in c-Abl, 50% error; Random seed = 429	289	4200	0.574	NC	77	8	204	0
NBN <15 nM DefGood in c-Abl, 10% error; Random seed = 121783	289	101.7	0.955	NC	73	185	27	4
NBN <15 nM DefGood in c-Abl, 20% error; Random seed = 121783	289	101.8	0.951	NC	64	195	17	13
NBN <15 nM DefGood in c-Abl, 40% error; Random seed = 121783	289	112.3	0.917	NC	59	189	23	18
NBN <15 nM DefGood in c-Abl, 45% error; Random seed = 121783	289	4900	0.852	NC	66	151	61	11
RF <15 nM DefGood in c-Abl, 5% error; Random seed = 1515533876005	289	45.7	0.94	NC	59	193	19	18
RF <15 nM DefGood in c-Abl, 10% error; Random seed = 1515533876005	289	34.9	0.932	NC	60	192	20	17
RF <15 nM DefGood in c-Abl, 15% error; Random seed = 1515533876005	289	35.9	0.923	NC	61	190	22	16
RF <15 nM DefGood in c-Abl, 20% error; Random seed = 1515533876005	289	140	0.918	NC	65	185	27	12
RF <15 nM DefGood in c-Abl, 30% error; Random seed = 1515533876005	289	140	0.836	NC	56	178	34	21
RF <15 nM DefGood in c-Abl, 35% error; Random seed = 1515533876005	289	390	0.745	NC	45	168	44	32
RF <15 nM DefGood in c-Abl, 40% error; Random seed = 1515533876005	289	3800	0.625	NC	38	142	70	39
RF <15 nM DefGood in c-Abl, 10% error; Random seed = 429	289	39.6	0.91	NC	52	194	18	25
RF <15 nM DefGood in c-Abl, 20% error; Random seed = 429	289	11.5	0.848	NC	51	188	24	26
RF <15 nM DefGood in c-Abl, 25% error; Random seed = 429	289	2400	0.814	NC	47	183	29	30
RF <15 nM DefGood in c-Abl, 10% error; Random seed = 121783	289	117	0.916	NC	52	196	16	25
RF <15 nM DefGood in c-Abl, 20% error; Random seed = 121783	289	137	0.83	NC	47	185	27	30
RF <15 nM DefGood in c-Abl, 30% error; Random seed = 121783	289	138	0.772	NC	46	182	30	31
RF <15 nM DefGood in c-Abl, 35% error; Random seed = 121783	289	1100	0.726	NC	42	166	46	35
PNN <15 nM DefGood in c-Abl, 5% error; Random seed = 1515533876005	289	390	0.857	NC	40	200	12	37
PNN <15 nM DefGood in c-Abl, 10% error; Random seed = 1515533876005	289	470	0.822	NC	33	198	14	44
PNN <15 nM DefGood in c-Abl, 15% error; Random seed = 1515533876005	289	400	0.825	NC	45	189	23	32
PNN <15 nM DefGood in c-Abl, 20% error; Random seed = 1515533876005	289	565	0.81	NC	42	186	26	35
PNN <15 nM DefGood in c-Abl, 25% error; Random seed = 1515533876005	289	560	0.775	NC	37	186	26	40
PNN <15 nM DefGood in c-Abl, 30% error; Random seed = 1515533876005	289	503	0.713	NC	30	173	39	47
PNN <15 nM DefGood in c-Abl, 35% error; Random seed = 1515533876005	289	4300	0.668	NC	29	164	48	48
PNN <15 nM DefGood in c-Abl, 5% error; Random seed = 429	289	61.5	0.824	NC	23	207	5	54
PNN <15 nM DefGood in c-Abl, 10% error; Random seed = 429	289	420	0.781	NC	32	199	13	45
PNN <15 nM DefGood in c-Abl, 15% error; Random seed = 429	289	390	0.754	NC	34	195	17	43
PNN <15 nM DefGood in c-Abl, 20% error; Random seed = 429	289	480	0.732	NC	42	172	40	35
PNN <15 nM DefGood in c-Abl, 25% error; Random seed = 429	289	1200	0.711	NC	45	160	52	32
PNN <15 nM DefGood in c-Abl, 5% error; Random seed = 121783	289	110	0.819	NC	11	210	2	66
PNN <15 nM DefGood in c-Abl, 10% error; Random seed = 121783	289	370	0.766	NC	8	210	2	69
PNN <15 nM DefGood in c-Abl, 15% error; Random seed = 121783	289	2500	0.711	NC	5	210	2	72
Activated Xa
NBN<2.5 nM DefGood in Xa	332	3.2	0.897	NC	43	227	52	11
NBN<5 nM DefGood in Xa	332	9.9	0.817	NC	66	182	69	15
NBN<10 nM DefGood in Xa	332	11	0.796	NC	83	167	47	35
NBN<15 nM DefGood in Xa	333	5.5	0.794	NC	101	134	62	36
NBN<20 nM DefGood in Xa	332	5.5	0.783	NC	113	113	70	36
NBN<2.5 nM DefGood in Xa	333	10	0.953	NC	38	263	16	16
PNN<2.5 nM DefGood in Xa	333	23	0.78	NC	18	267	12	36
NBN <2.5 nM DefGood in Xa, 5% error; Random seed = 1515533876005	333	6.3	0.911	NC	48	209	70	6
NBN <2.5 nM DefGood in Xa, 10% error; Random seed = 1515533876005	333	6.2	0.902	NC	49	492	87	5
NBN <2.5 nM DefGood in Xa, 15% error; Random seed = 1515533876005	333	5.5	0.9	NC	46	237	42	8
NBN <2.5 nM DefGood in Xa, 20% error; Random seed = 1515533876005	333	5.5	0.87	NC	37	239	40	17
NBN <2.5 nM DefGood in Xa, 30% error; Random seed = 1515533876005	333	9.2	0.764	NC	35	205	74	19
NBN <2.5 nM DefGood in Xa, 35% error; Random seed = 1515533876005	333	9500	0.686	NC	35	192	87	19
NBN <2.5 nM DefGood in Xa, 10% error; Random seed = 429	333	8.2	0.868	NC	45	212	67	9
NBN <2.5 nM DefGood in Xa, 20% error; Random seed = 429	333	9.1	0.847	NC	45	201	78	9
NBN <2.5 nM DefGood in Xa, 30% error; Random seed = 429	333	9.3	0.802	NC	51	104	175	3
NBN <2.5 nM DefGood in Xa, 35% error; Random seed = 429	333	20.7	0.772	NC	33	214	65	21
NBN <2.5 nM DefGood in Xa, 40% error; Random seed = 429	333	12.1	0.739	NC	32	202	77	22
NBN <2.5 nM DefGood in Xa, 45% error; Random seed = 429	333	110	0.636	NC	32	164	115	22
NBN <2.5 nM DefGood in Xa, 10% error; Random seed = 121783	333	5.9	0.871	NC	40	244	35	14
NBN <2.5 nM DefGood in Xa, 20% error; Random seed = 121783	333	10	0.863	NC	39	242	37	15
NBN <2.5 nM DefGood in Xa, 35% error; Random seed = 121783	333	40	0.781	NC	47	127	152	7
NBN <2.5 nM DefGood in Xa, 40% error; Random seed = 121783	333	43.5	0.73	NC	34	190	89	20
NBN <2.5 nM DefGood in Xa, 45% error; Random seed = 121783	333	350	0.676	NC	23	219	60	31
RF <2.5 nM DefGood in Xa, 5% error; Random seed = 1515533876005	333	11.5	0.94	NC	36	260	19	18
RF <2.5 nM DefGood in Xa, 10% error; Random seed = 1515533876005	333	11.9	0.902	NC	32	261	18	22
RF <2.5 nM DefGood in Xa, 20% error; Random seed = 1515533876005	333	36.8	0.839	NC	28	247	32	26
RF <2.5 nM DefGood in Xa, 25% error; Random seed = 1515533876005	333	30.2	0.794	NC	25	245	34	29
RF <2.5 nM DefGood in Xa, 30% error; Random seed = 1515533876005	333	1000	0.759	NC	27	227	52	27
RF <2.5 nM DefGood in Xa, 10% error; Random seed = 429	333	3.3	0.919	NC	37	266	13	17
RF <2.5 nM DefGood in Xa, 20% error; Random seed = 429	333	48.7	0.852	NC	31	256	23	23
RF <2.5 nM DefGood in Xa, 25% error; Random seed = 429	333	60.5	0.814	NC	29	245	34	25
RF <2.5 nM DefGood in Xa, 30% error; Random seed = 429	333	530	0.715	NC	26	230	49	28
RF <2.5 nM DefGood in Xa, 10% error; Random seed = 121783	333	12.5	0.877	NC	30	266	13	24
RF <2.5 nM DefGood in Xa, 20% error; Random seed = 121783	333	200	0.802	NC	27	257	22	27
RF <2.5 nM DefGood in Xa, 25% error; Random seed = 121783	333	130	0.775	NC	31	246	33	23
RF <2.5 nM DefGood in Xa, 30% error; Random seed = 121783	333	680	0.73	NC	30	228	51	24
PNN <2.5 nM DefGood in Xa, 5% error; Random seed = 1515533876005	333	83.5	0.769	NC	19	259	20	35
PNN <2.5 nM DefGood in Xa, 10% error; Random seed = 1515533876005	333	120	0.753	NC	19	256	23	35
PNN <2.5 nM DefGood in Xa, 15% error; Random seed = 1515533876005	333	120	0.718	NC	20	251	28	34
PNN <2.5 nM DefGood in Xa, 20% error; Random seed = 1515533876005	333	89	0.686	NC	22	240	39	32
PNN <2.5 nM DefGood in Xa, 5% error; Random seed = 429	333	66.3	0.71	NC	15	269	10	39
PNN <2.5 nM DefGood in Xa, 10% error; Random seed = 429	333	145	0.696	NC	12	264	15	42
PNN <2.5 nM DefGood in Xa, 5% error; Random seed = 121783	333	190	0.79	NC	17	271	8	37
PNN <2.5 nM DefGood in Xa, 10% error; Random seed = 121783	333	120	0.744	NC	16	269	10	38
PNN <2.5 nM DefGood in Xa, 15% error; Random seed = 121783	333	120	0.735	NC	18	261	18	36
PNN <2.5 nM DefGood in Xa, 20% error; Random seed = 121783	333	210	0.733	NC	19	253	26	35
PNN <2.5 nM DefGood in Xa, 30% error; Random seed = 121783	333	290	0.668	NC	21	230	49	33
HIV Protease
NBN<2.5 nM DefGood in HIV Protease	510	8.31	0.906	NC	111	274	114	11
NBN<5 nM DefGood in HIV Protease	509	15	0.895	NC	123	293	65	28
NBN<10 nM DefGood in HIV Protease	510	2.9	0.87	NC	166	255	98	21
NBN<15 nM DefGood in HIV Protease	509	1.66	0.874	NC	187	205	93	24
NBN<20 nM DefGood in HIV Protease	510	15	0.851	NC	181	215	70	44
NBN<25 nM DefGood in HIV Protease	509	11.8	0.875	NC	204	200	75	30
RF<15 nM DefGood in HIV Protease	509	18.7	0.92	NC	179	255	43	32
PNN<15 nM DefGood in HIV Protease	509	117	0.805	NC	126	257	41	85
NBN <15 nM DefGood in HIV Protease, 10% error; Random seed = 1515533876005	509	1.83	0.881	NC	174	229	69	37
NBN <15 nM DefGood in HIV Protease, 20% error; Random seed = 1515533876005	509	2.26	0.874	NC	177	211	87	34
NBN <15 nM DefGood in HIV Protease, 30% error; Random seed = 1515533876005	509	7.9	0.864	NC	175	220	78	36
NBN <15 nM DefGood in HIV Protease, 40% error; Random seed = 1515533876005	509	4.6	0.759	NC	116	256	42	95
NBN <15 nM DefGood in HIV Protease, 45% error; Random seed = 1515533876005	509	5.8	0.71	NC	123	226	72	88
NBN <15 nM DefGood in HIV Protease, 50% error; Random seed = 1515533876005	509	8500	0.514	NC	39	263	35	172
NBN <15 nM DefGood in HIV Protease, 10% error; Random seed = 429	509	1.58	0.868	NC	171	218	80	40
NBN <15 nM DefGood in HIV Protease, 20% error; Random seed = 429	509	2.65	0.856	NC	175	206	92	36
NBN <15 nM DefGood in HIV Protease, 30% error; Random seed = 429	509	3.13	0.842	NC	187	188	110	24
NBN <15 nM DefGood in HIV Protease, 40% error; Random seed = 429	509	10.6	0.764	NC	196	22	176	15
NBN <15 nM DefGood in HIV Protease, 45% error; Random seed = 429	509	893	0.68	NC	189	88	210	22
NBN <15 nM DefGood in HIV Protease, 10% error; Random seed = 121783	509	10.6	0.86	NC	177	224	74	34
NBN <15 nM DefGood in HIV Protease, 20% error; Random seed = 121783	509	10.6	0.856	NC	175	228	70	36
NBN <15 nM DefGood in HIV Protease, 30% error; Random seed = 121783	509	7.52	0.848	NC	168	227	71	43
NBN <15 nM DefGood in HIV Protease, 40% error; Random seed = 121783	509	15.2	0.79	NC	135	246	52	76
NBN <15 nM DefGood in HIV Protease, 45% error; Random seed = 121783	509	16.5	0.732	NC	152	194	104	59
NBN <15 nM DefGood in HIV Protease, 50% error; Random seed = 121783	509	12000	0.549	NC	194	24	274	17
RF <15 nM DefGood in HIV Protease, 10% error; Random seed = 1515533876005	510	12.7	0.906	NC	139	284	39	48
RF <15 nM DefGood in HIV Protease, 20% error; Random seed = 1515533876005	510	14.7	0.843	NC	130	260	63	57
RF <15 nM DefGood in HIV Protease, 30% error; Random seed = 1515533876005	510	10.2	0.753	NC	116	239	84	71
RF <15 nM DefGood in HIV Protease, 35% error; Random seed = 1515533876005	510	3700	0.684	NC	103	225	98	84
RF <15 nM DefGood in HIV Protease, 10% error; Random seed = 429	510	10.2	0.901	NC	143	286	37	44
RF <15 nM DefGood in HIV Protease, 15% error; Random seed = 429	510	10.3	0.88	NC	135	279	44	52
RF <15 nM DefGood in HIV Protease, 20% error; Random seed = 429	510	941	0.855	NC	139	273	50	48
RF <15 nM DefGood in HIV Protease, 10% error; Random seed = 121783	510	17.9	0.894	NC	133	287	36	54
RF <15 nM DefGood in HIV Protease, 15% error; Random seed = 121783	510	1100	0.872	NC	127	286	37	60
PNN <15 nM DefGood in HIV Protease, 10% error; Random seed = 1515533876005	509	111	0.769	NC	128	239	59	83
PNN <15 nM DefGood in HIV Protease, 20% error; Random seed = 1515533876005	509	114	0.715	NC	139	207	91	72
PNN <15 nM DefGood in HIV Protease, 25% error; Random seed = 1515533876005	509	217	0.654	NC	120	202	96	91
PNN - <15nM DefGood in HIV Protease, 25% error; Random seed = 1515533876005 (reparameterized Theta minus = 0.55; theta plus = 0.75)	509	150	0.698	NC	84	254	44	127
PNN <15 nM DefGood in HIV Protease, 10% error; Random seed = 429	509	251	0.787	NC	123	250	48	88
PNN <15 nM DefGood in HIV Protease, 15% error; Random seed = 429	509	756	0.75	NC	109	250	48	102
PNN <15 nM DefGood in HIV Protease, 10% error; Random seed = 12178	509	269	0.752	NC	104	254	44	107
PNN <15 nM DefGood in HIV Protease, 20% error; Random seed = 12178	509	267	0.708	NC	93	245	53	118
PNN <15 nM DefGood in HIV Protease, 25% error; Random seed = 12178	509	498	0.669	NC	109	221	77	102
JAK2
NBN <5 nM DefGood in JAK2	725	175	0.836	NC	67	510	119	29
NBN <10 nM DefGood in JAK2	726	309	0.767	NC	97	380	203	46
NBN <15 nM DefGood in JAK2	725	38.3	0.789	NC	110	442	110	63
NBN <20 nM DefGood in JAK2	726	32.6	0.767	NC	117	414	110	85
NBN <25 nM DefGood in JAK2	726	37.4	0.779	NC	161	369	129	67
RF <15 nM DefGood in JAK2	725	26.4	0.883	NC	99	524	28	74
PNN - <15 nM DefGood in JAK2 (0.95, 0.95)	725	3600	0.606	NC	0	552	0	173
NBN <15 nM DefGood in JAK2, 5% error; Random seed = 1515533876005	725	304	0.795	NC	127	392	160	46
NBN <15 nM DefGood in JAK2, 10% error; Random seed = 1515533876005	725	258	0.79	NC	125	382	170	48
NBN <15 nM DefGood in JAK2, 15% error; Random seed = 1515533876005	725	82.3	0.762	NC	104	447	105	69
NBN <15 nM DefGood in JAK2, 20% error; Random seed = 1515533876005	725	55.7	0.753	NC	128	349	203	45
NBN <15 nM DefGood in JAK2, 30% error; Random seed = 1515533876005	725	53.4	0.735	NC	109	401	151	94
NBN <15 nM DefGood in JAK2, 35% error; Random seed = 1515533876005	725	77.7	0.71	NC	136	364	288	37
NBN <15 nM DefGood in JAK2, 40% error; Random seed = 1515533876005	725	131	0.644	NC	75	418	134	98
NBN <15 nM DefGood in JAK2, 10% error; Random seed = 429	725	71.9	0.795	NC	109	424	128	64
NBN <15 nM DefGood in JAK2, 20% error; Random seed = 429	725	419	0.764	NC	118	397	155	55
NBN <15 nM DefGood in JAK2, 25% error; Random seed = 429	725	431	0.731	NC	77	479	73	96
NBN <15 nM DefGood in JAK2, 30% error; Random seed = 429	725	418	0.698	NC	97	386	166	76
NBN <15 nM DefGood in JAK2, 10% error; Random seed = 121783	725	1427	0.782	NC	134	325	227	39
NBN <15 nM DefGood in JAK2, 0% error; Random seed = 121783	725	1427	-	-	-	-	-	-
NBN <15 nM DefGood in JAK2, 10% error; Random seed = 12178	725	65.7	0.751	NC	112	404	148	61
NBN <15 nM DefGood in JAK2, 20% error; Random seed = 12178	725	50.6	0.75	NC	100	443	109	73
NBN <15 nM DefGood in JAK2, 30% error; Random seed = 12178	725	136	0.743	NC	122	365	187	51
NBN <15 nM DefGood in JAK2, 35% error; Random seed = 12178	725	117	0.727	NC	106	420	132	67
NBN <15 nM DefGood in JAK2, 40% error; Random seed = 12178	725	141	0.683	NC	95	408	143	78
RF <15 nM DefGood in JAK2, 10% error; Random seed = 1515533876005	725	50.3	0.846	NC	96	509	43	77
Rf <15 nM DefGood in JAK2, 20% error; Random seed = 1515533876005	725	139	0.804	NC	91	489	63	82
RF <15 nM DefGood in JAK2, 25% error; Random seed = 1515533876005	725	94.8	0.793	NC	95	470	82	78
RF <15 nM DefGood in JAK2, 30% error; Random seed = 1515533876005	725	231	0.766	NC	97	453	99	76
RF <15 nM DefGood in JAK2, 35% error; Random seed = 1515533876005	725	264	0.722	NC	99	409	143	74
RF <15 nM DefGood in JAK2, 40% error; Random seed = 1515533876005	725	266.8	0.659	NC	90	398	154	83
RF <15 nM DefGood in JAK2, 10% error; Random seed = 429	725	52	0.857	NC	91	502	50	82
RF <15 nM DefGood in JAK2, 15% error; Random seed = 429	725	34	0.843	NC	94	491	61	79
RF <15 nM DefGood in JAK2, 20% error; Random seed = 429	725	46.8	0.836	NC	95	487	65	78
RF <15 nM DefGood in JAK2, 30% error; Random seed = 429	725	2300	0.785	NC	97	457	95	76
RF <15 nM DefGood in JAK2, 10% error; Random seed = 121783	725	454	0.842	NC	98	500	52	75
RF <15 nM DefGood in JAK2, 20% error; Random seed = 121783	725	653	0.772	NC	90	477	75	83
RF <15 nM DefGood in JAK2, 30% error; Random seed = 121783	725	563	0.706	NC	84	443	109	89
RF <15 nM DefGood in JAK2, 35% error; Random seed = 121783	725	743	0.64	NC	87	411	141	86
MEK1
NBN <5 nM DefGood in MEK1	165	271	0.932	NC	5	108	51	1
NBN <10 nM DefGood in MEK1	165	93.5	0.841	NC	11	122	28	5
NBN <15 nM DefGood in MEK1	165	129	0.87	NC	21	99	43	2
NBN <20 nM DefGood in MEK1	166	121	0.88	NC	27	98	38	3
NBN <25 nM DefGood in MEK1	166	54	0.847	NC	25	106	24	10
NBN <35 nM DefGood in MEK1	165	23	0.868	NC	34	98	20	13
NBN <50 nM DefGood in MEK1	165	23.4	0.843	NC	37	88	19	21
RF <50 nM DefGood in MEK1	165	120	0.883	NC	43	89	18	15
PNN - <50 nM DefGood in MEK1	165	47.9	0.783	NC	30	88	19	28
NBN <50 nM DefGood in MEK1, 5% error; Random seed = 1515533876005	165	20.4	0.838	NC	45	76	31	13
NBN <50 nM DefGood in MEK1, 10% error; Random seed = 1515533876005	165	23.4	0.82	NC	41	81	26	17
NBN <50 nM DefGood in MEK1, 20% error; Random seed = 1515533876005	165	23.1	0.802	NC	51	58	49	7
NBN <50 nM DefGood in MEK1, 30% error; Random seed = 1515533876005	165	419.7	0.763	NC	53	43	64	5
NBN <50 nM DefGood in MEK1, 35% error; Random seed = 1515533876005	165	491	0.712	NC	51	44	63	7
NBN <50 nM DefGood in MEK1, 40% error; Random seed = 1515533876005	165	3700	0.626	NC	42	53	54	16
NBN <50 nM DefGood in MEK1, 20% error; Random seed = 429	165	22.6	0.804	NC	40	77	30	18
NBN <50 nM DefGood in MEK1, 30% error; Random seed = 429	165	59.8	0.748	NC	40	68	39	18
NBN <50 nM DefGood in MEK1, 35% error; Random seed = 429	165	96	0.69	NC	41	63	44	17
NBN <50 nM DefGood in MEK1, 20% error; Random seed = 121783	165	20.8	0.789	NC	39	87	20	19
NBN <50 nM DefGood in MEK1, 30% error; Random seed = 121783	165	40.6	0.768	NC	44	78	29	14
NBN <50 nM DefGood in MEK1, 35% error; Random seed = 121783	165	45.5	0.718	NC	49	51	56	9
NBN <50 nM DefGood in MEK1, 40% error; Random seed = 121783	165	104	0.689	NC	49	37	70	9
RF <50 nM DefGood in MEK1, 10% error; Random seed = 1515533876005	165	138	0.857	NC	40	91	16	18
RF <50 nM DefGood in MEK1, 20% error; Random seed = 1515533876005	165	148	0.81	NC	39	86	21	19
RF <50 nM DefGood in MEK1, 25% error; Random seed = 1515533876005	165	76.9	0.78	NC	36	86	21	22
RF <50 nM DefGood in MEK1, 30% error; Random seed = 1515533876005	165	1200	0.724	NC	36	81	26	22
RF <50 nM DefGood in MEK1, 10% error; Random seed = 429	165	38.5	0.868	NC	40	96	11	18
RF <50 nM DefGood in MEK1, 20% error; Random seed = 429	165	20.3	0.775	NC	38	93	14	20
RF <50 nM DefGood in MEK1, 25% error; Random seed = 429	165	20.3	0.757	NC	38	87	20	20
RF <50 nM DefGood in MEK1, 30% error; Random seed = 429	165	689	0.718	NC	39	73	34	19
RF <50 nM DefGood in MEK1, 35% error; Random seed = 429	165	832	0.622	NC	32	65	42	26
RF <50 nM DefGood in MEK1, 10% error; Random seed = 121786	165	19.5	0.856	NC	37	93	14	21
RF <50 nM DefGood in MEK1, 20% error; Random seed = 121786	165	56.3	0.711	NC	31	87	20	27
RF <50 nM DefGood in MEK1, 25% error; Random seed = 121786	165	6900	0.703	NC	34	81	26	24
PNN <50 nM DefGood in MEK1, 5% error; Random seed = 1515533876005	165	778	0.784	NC	34	85	22	24
PNN <50 nM DefGood in MEK1, 5% error; Random seed = 429	165	1700	0.743	NC	29	84	23	29
PNN - <50nM DefGood in MEK1, 5% error; Random seed = 429 (reparameterized Theta minus = 0.15; theta plus = 0.85)	165	1700	0.756	NC	26	85	22	32
PNN <50 nM DefGood in MEK1, 5% error; Random seed = 121783	165	72.1	0.809	NC	29	96	11	29
PNN <50 nM DefGood in MEK1, 10% error; Random seed = 121783	165	91.8	0.789	NC	26	94	13	32
PNN <50 nM DefGood in MEK1, 15% error; Random seed = 121783	165	102	0.733	NC	29	79	28	29
PNN <50 nM DefGood in MEK1, 20% error; Random seed = 121783	165	12600	0.647	NC	22	77	30	36
PNN - <50nM DefGood in MEK1, 20% error; Random seed = 121783 (reparameterized Theta minus = 0.35; theta plus = 0.35)	165	115	0.729	NC	17	98	9	41
PNN - <50nM DefGood in MEK1, 25% error; Random seed = 121783 (reparameterized Theta minus = 0.35; theta plus = 0.35)	165	79	0.692	NC	24	84	23	34
PARP1
NBN <5 nM DefGood in PARP1	388	106	0.934	NC	31	312	42	3
NBN <10 nM DefGood in PARP1	388	10.5	0.921	NC	60	273	48	7
NBN <15 nM DefGood in PARP1	388	13.4	0.919	NC	76	256	45	10
NBN <20 nM DefGood in PARP1	388	7.5	0.921	NC	88	241	42	17
NBN <25 nM DefGood in PARP1	388	15.7	0.873	NC	89	227	42	30
RF <20 nM DefGood in PARP1	388	6.1	0.951	NC	90	266	17	15
PNN <20 nM DefGood in PARP1	388	47.7	0.79	NC	19	578	5	86
NBN <20 nM DefGood in PARP1, 5% error; Random seed = 1515533876005	388	10200	0.912	NC	90	233	50	15
NBN <20 nM DefGood in PARP1, 5% error; Random seed = 429	388	9.6	0.905	NC	89	242	41	16
NBN <20 nM DefGood in PARP1, 10% error; Random seed = 429	388	9.5	0.905	NC	90	241	42	15
NBN <20 nM DefGood in PARP1, 20% error; Random seed = 429	388	9.6	0.892	NC	78	253	30	27
NBN <20 nM DefGood in PARP1, 30% error; Random seed = 429	388	9.2	0.858	NC	87	201	82	18
NBN <20 nM DefGood in PARP1, 40% error; Random seed = 429	388	510	0.803	NC	77	222	61	28
NBN <20 nM DefGood in PARP1, 45% error; Random seed = 429	388	7400	0.735	NC	85	145	134	20
NBN <20 nM DefGood in PARP1, 20% error; Random seed = 121783	388	13.2	0.924	NC	94	239	44	11
NBN <20 nM DefGood in PARP1, 30% error; Random seed = 121783	388	9.4	0.917	NC	87	247	36	18
NBN <20 nM DefGood in PARP1, 40% error; Random seed = 121783	388	280	0.876	NC	93	204	79	12
NBN <20 nM DefGood in PARP1, 45% error; Random seed = 121783	388	21.4	0.816	NC	99	109	174	6
NBN <20 nM DefGood in PARP1, 50% error; Random seed = 121783	388	4700	0.681	NC	105	2	281	0
RF <20 nM DefGood in PARP1, 10% error; Random seed = 1515533876005	388	7.3	0.926	NC	86	257	26	19
RF <20 nM DefGood in PARP1, 20% error; Random seed = 1515533876005	388	18.1	0.906	NC	83	245	38	22
RF <20 nM DefGood in PARP1, 25% error; Random seed = 1515533876005	388	282	0.866	NC	74	237	46	31
RF <20 nM DefGood in PARP1, 30% error; Random seed = 1515533876005	388	546	0.816	NC	70	228	55	35
RF <20 nM DefGood in PARP1, 35% error; Random seed = 1515533876005	388	631	0.751	NC	63	225	58	42
RF <20 nM DefGood in PARP1, 40% error; Random seed = 1515533876005	388	3600	0.644	NC	56	199	84	49
RF <20 nM DefGood in PARP1, 10% error; Random seed = 429	388	12.1	0.901	NC	75	257	26	30
RF <20 nM DefGood in PARP1, 20% error; Random seed = 429	388	109	0.862	NC	69	248	35	36
RF <20 nM DefGood in PARP1, 25% error; Random seed = 429	388	2700	0.816	NC	70	232	51	35
RF <20 nM DefGood in PARP1, 10% error; Random seed = 121783	388	11.9	0.924	NC	78	256	27	27
RF <20 nM DefGood in PARP1, 20% error; Random seed = 121783	388	16.9	0.87	NC	73	248	35	32
RF <20 nM DefGood in PARP1, 25% error; Random seed = 121783	388	24.3	0.844	NC	72	241	42	33
RF <20 nM DefGood in PARP1, 30% error; Random seed = 121783	388	32.5	0.797	NC	70	225	58	35
RF <20 nM DefGood in PARP1, 35% error; Random seed = 121783	388	64.8	0.742	NC	64	216	67	41
RF <20 nM DefGood in PARP1, 40% error; Random seed = 121783	388	194	0.696	NC	62	201	82	43
PNN <20 nM DefGood in PARP1, 5% error; Random seed = 1515533876005	388	2600	0.775	NC	7	283	0	98
PNN <20 nM DefGood in PARP1, 5% error; Random seed = 1515533876005 (reparameterized Theta minus = 0.05; theta plus = 0.95)	388	49.9	0.776	NC	24	273	10	81
PNN <20 nM DefGood in PARP1, 10% error; Random seed = 1515533876005	388	27.4	0.757	NC	42	260	23	63
PNN <20 nM DefGood in PARP1, 20% error; Random seed = 1515533876005	388	146	0.737	NC	41	247	36	64
PNN <20 nM DefGood in PARP1, 25% error; Random seed = 1515533876005	388	318	0.676	NC	34	241	42	71
PNN <20 nM DefGood in PARP1, 25% error; Random seed = 1515533876005 (reparameterized Theta minus = 0.05; theta plus = 0.95)	388	718	0.689	NC	0	279	4	105
PNN <20 nM DefGood in PARP1, 5% error; Random seed = 429	388	2800	0.744	NC	18	276	7	87
PNN <20 nM DefGood in PARP1, 5% error; Random seed = 429 (reparameterized Theta minus = 0.05; theta plus = 0.75))	388	2800	0.742	NC	35	261	22	70
PNN <20 nM DefGood in PARP1, 5% error; Random seed = 121783	388	73	0.764	NC	16	279	4	89
PNN <20 nM DefGood in PARP1, 10% error; Random seed = 121783	388	274	0.733	NC	18	272	11	87
PNN <20 nM DefGood in PARP1, 15% error; Random seed = 121783	388	232	0.726	NC	20	269	14	85
PNN <20 nM DefGood in PARP1, 20% error; Random seed = 121783	388	336	0.697	NC	42	244	39	63
PNN <20 nM DefGood in PARP1, 20% error; Random seed = 121783 (reparameterized Theta minus = 0.35; theta plus = 0.75)	388	150	0.703	NC	14	271	12	91
PNN <20 nM DefGood in PARP1, 25% error; Random seed = 121783 (reparameterized Theta minus = 0.35; theta plus = 0.65)	388	1900	0.685	NC	32	243	40	73
TYRO3
NBN <5 nM DefGood in TYRO3	56	61	0.727	NC	0	54	1	1
NBN <10 nM DefGood in TYRO3	56	109	0.806	NC	1	36	18	1
NBN <15 nM DefGood in TYRO3	56	87.4	0.975	NC	3	49	4	0
NBN <20 nM DefGood in TYRO3	56	54.8	0.91	NC	4	43	10	0
NBN <25 nM DefGood in TYRO3	56	54.7	0.925	NC	5	35	16	0
NBN <35 nM DefGood in TYRO3	56	48.6	0.907	NC	7	33	16	0
RF <25 nM DefGood in TYRO3	56	16.5	0.947	NC	3	49	2	2
NBN <25 nM DefGood in TYRO3, 5% error; Random seed = 1515533876005	56	45.2	0.867	NC	5	35	16	0
NBN <25 nM DefGood in TYRO3, 10% error; Random seed = 1515533876005	56	39.1	0.847	NC	5	28	23	0
NBN <25 nM DefGood in TYRO3, 15% error; Random seed = 1515533876005	56	39.1	0.775	NC	4	33	18	1
NBN <25 nM DefGood in TYRO3, 20% error; Random seed = 1515533876005	56	39.1	0.749	NC	4	29	22	1
NBN <25 nM DefGood in TYRO3, 25% error; Random seed = 1515533876005	56	39.1	0.71	NC	4	29	22	1
NBN <25 nM DefGood in TYRO3, 30% error; Random seed = 1515533876005	56	39.1	0.51	NC	2	28	23	3
NBN <25 nM DefGood in TYRO3, 5% error; Random seed = 429	56	137	0.714	NC	2	45	6	3
NBN <25 nM DefGood in TYRO3, 10% error; Random seed = 429	56	65	0.596	NC	3	35	16	2
NBN <25 nM DefGood in TYRO3, 5% error; Random seed = 121783	56	1100	0.876	NC	5	30	21	0
NBN <25 nM DefGood in TYRO3, 10% error; Random seed = 121783	56	915	0.904	NC	5	30	21	0
RF <25 nM DefGood in TYRO3, 10% error; Random seed = 1515533876005	56	39.9	0.906	NC	3	47	4	2
RF <25 nM DefGood in TYRO3, 15% error; Random seed = 1515533876005	56	39.9	0.814	NC	3	47	4	2
RF <25 nM DefGood in TYRO3, 20% error; Random seed = 1515533876005	56	3900	0.743	NC	3	47	4	2
RF <25 nM DefGood in TYRO3, 0% error; Random seed = 429	56	20.2	0.753	NC	1	51	0	4
RF <25 nM DefGood in TYRO3, 5% error; Random seed = 429	56	36.8	0.641	NC	0	51	0	5
RF <25 nM DefGood in TYRO3, 0% error; Random seed = 121783	56	866	0.953	NC	5	38	13	0
RF <25 nM DefGood in TYRO3, 0% error; Random seed = 12178	56	54.8	0.79	NC	1	50	1	4
RF <25 nM DefGood in TYRO3, 5% error; Random seed = 12178	56	266.8	0.445	NC	1	49	2	4
